## Labels of aberrant Clusters of Differentiation gene expression in a compendium of systemic lupus erythematosus patients

Trang T. Le, Ph.D., Nigel O. Blackwood, Matthew K. Breitenstein, Ph.D.\*

Department of Biostatistics, Epidemiology, & Informatics, Perelman School of Medicine,  
University of Pennsylvania, Philadelphia, PA, USA

\* correspondence to: *mkbreit at pennmedicine dot upenn dot edu*

### Background

This author manuscript serves as an extended annotation of gene expression for all known clusters of differentiation (CD) within a compendium of systemic lupus erythematosus (SLE) patients. The overarching goal for this line of research is to enrich the perspective of the CD transcriptome with upstream gene expression features.

### Introduction

CDs are cell surface biomarkers that denote key biological differences between cell types and disease state. For each of the >400 known CDs<sup>1</sup>, distinct monoclonal antibodies (mABs) enable robust immunophenotyping and serve as scalable biomarkers for translational research. Annotation of CD molecules have been organized through a series of international meetings known as the Human Leucocyte Differentiation Antigens (HLDA) Workshops, affiliated with the Human Cell Differentiation Molecules (HCDM) organization.

**CD nomenclature** <<http://www.hcdm.org/>>

### Methods

A compendium containing human SLE gene expression data was previously collected, aggregated, and normalized by collaborators in the Greene Lab at the University of Pennsylvania. <<https://github.com/greenelab/rheum-plier-data/tree/master/sle-wb>> This compendium was slightly modified to include basic demographic information and exclude patients not belonging to classifications of healthy control, treatment naïve SLE, or SLE with exposure to various treatments – the modified dataset represents our ‘**SLE Compendium**’. Entrez gene ID to CD mapping was provided by HCDM<sup>1</sup>. The SLE Compendium dataset and R code corresponding to data pre-processing can be found on the Breitenstein Lab Github page.

**SLE Compendium:** <<https://breitensteinlab.github.io/SLE-Compendium-2018/>>

Within our SLE Compendium, all known CDs gene expression of , were categorized as ‘aberrant’ or ‘non-aberrant’ based on the following criteria: *i*) two-tailed normalization at 20<sup>th</sup> and 80<sup>th</sup> percentile of relative gene expression. Specifically, the two tails encompassed ‘aberrant’ CD expression, whereas the middle distribution served as ‘non-aberrant’. Following visual inspection of all histograms, specific CDs were deemed to require manual adjustments. *ii*) Manually adjustment of two-tail normalization was applied when CDs followed apparent normal distribution but would require slight modification of thresholds to characterization feature variation. *iii*) Binarization CD features was applied when an obvious non-normal distribution was observed. Thresholds separated the expression values into low/high groups (instead of non-aberrant/aberrant) to capture apparent patterns in the expression distributions.

In future research, CDs will be enriched with perspective of interdependent gene expression features using the integrated machine learning pipeline for aberrant biomarker enrichment (**i-mAB pipeline**).

**i-mAB pipeline:** <<https://breitensteinlab.github.io/i-mAB/>>

### Results

Within the original study cohorts, multiple observations were generated for most patients. Observation characteristics of the SLE Compendium, including PMID for the 6 original studies<sup>2,3,4,5,6,7</sup>, can be found in **Table 1**. Additional sample/cohort can be ascertained from the Gene Expression Omnibus via GSE or GEO accession ID.

**Gene Expression Omnibus:** <<https://www.ncbi.nlm.nih.gov/geo/query/acc.cgi>>

**Table 1. SLE Compendium characteristics as ascertained from study of origin**

|                                | <u>Cohort 1</u> <sup>2</sup> | <u>Cohort 2</u> <sup>3</sup> | <u>Cohort 3</u> <sup>4</sup> | <u>Cohort 4</u> <sup>5</sup> | <u>Cohort 5</u> <sup>6</sup> | <u>Cohort 6</u> <sup>7</sup> | <u>Overall</u> |
|--------------------------------|------------------------------|------------------------------|------------------------------|------------------------------|------------------------------|------------------------------|----------------|
| <b>Study PMID</b>              | 18631455                     | 23203821                     | 24644022                     | 25736140                     | 27040498                     | 26138472                     | ---            |
| <b>Study GEO identifier</b>    | GSE11907                     | GSE39088                     | GSE49454                     | GSE61635                     | GSE65391                     | GSE78193                     | ---            |
| <b>Healthy control*</b>        | <b>0</b>                     | <b>46</b>                    | <b>0</b>                     | <b>30</b>                    | <b>72</b>                    | <b>12</b>                    | <b>160</b>     |
| median age (range)             | ---                          | 34.5<br>(19-50)              | ---                          | ---                          | 12<br>(6-21)                 | ---                          | 16<br>(6-50)   |
| gender - female/male           | ---                          | 34                           | ---                          | ---                          | 57                           | ---                          | 91             |
| <b>SLE-treatment naïve*</b>    | <b>37</b>                    | <b>21</b>                    | <b>177</b>                   | <b>99</b>                    | <b>924</b>                   | <b>32</b>                    | <b>1290</b>    |
| median age (range)             | 14<br>(8-17)                 | 43<br>(20-50)                | 40<br>(18-71)                | ---                          | 15<br>(6-19)                 | ---                          | 16<br>(6-71)   |
| gender - female                | 35                           | 21                           | 148                          | ---                          | 817                          | ---                          | 1021           |
| <b>SLE-various treatments*</b> | <b>0</b>                     | <b>57</b>                    | <b>0</b>                     | <b>0</b>                     | <b>0</b>                     | <b>69</b>                    | <b>126</b>     |
| median age (range)             | ---                          | 36<br>(19-50)                | ---                          | ---                          | ---                          | ---                          | 36<br>(19-50)  |
| gender - female/male           | ---                          | 57                           | ---                          | ---                          | ---                          | ---                          | 57             |

\*observation characteristics include multiple observations per patient

By default, CD gene expression thresholds were labeled as ‘aberrant’ or ‘non-aberrant’, with ‘aberrant’ being further delineated as ‘low’ or ‘high’. Gene expression was stratified at 20 and 80 percentiles, with low expression being between 0 and 20, average between 20 and 80, and high between 80 and 100. Descriptive statistics of CD gene expression with corresponding Entrez ID can be found in **Supplement 1, Table 2**.

Overall the default two-tailed thresholds provided satisfactory characterization of ‘aberrant’ (including ‘low’ and ‘high’) vs. ‘non-aberrant’ normal gene expression distributions. However, some CDs required manual adjustment, including shifting of thresholds (n=3) and binary transformation for non-normal distributions (n=85) (**Supplement 2, Table 3**). Amongst CD genes requiring binary transformation, no clear data-driven hypothesis of ‘aberrant’ vs ‘average’ was practical so gene expression was labeled simply as ‘low’ or ‘high’ (i.e. no clear baseline comparison is available). Consensus review by the research team determined manual revisions of thresholds. Detailed labelling of all CD features (n=351) identified within the SLE Compendium can be found in **Supplement 3, Figures 1-290**. Included are histograms of CD gene expression distribution and descriptive statistics of expression and variation.

## References

1. Clark G, Stockinger H, Balderas R, van Zelm MC, Zola H, Hart D, Engel P. Nomenclature of CD molecules from the tenth human Leucocyte differentiation antigen workshop. *Clinical & Translational Immunology*. 2016; 5(1).
2. Chaussabel D, Quinn C, Shen J, Patel P, Glaser C, Baldwin N, et al. A modular analysis framework for blood genomics studies: application to systemic lupus erythematosus. *Immunity*. 2008 18;29(1): 150-64. (**GSE11907**)
3. Lauwerys BR, Hachulla E, Spertini F, Lazaro E, Jorgensen C, Mariette X, et al. Down-regulation of interferon signature in systemic lupus erythematosus patients by active immunization with interferon  $\alpha$ -kinoid. *Arthritis & Rheumatology*. 2013; 65(2):447-56. (**GSE39088**)
4. Chiche L, Jourde-Chiche N, Whalen E, Presnell S, Gersuk V, Dang K, et al. Modular transcriptional repertoire analyses of adults with systemic lupus erythematosus reveal distinct type I and type II interferon signatures. *Arthritis & Rheumatology*. 2014; 66(6):1583-95. (**GSE49454**)
5. Carpintero MF, Martinez L, Fernandez I, Romero AG, Mejia C, Zang Y, et al. Diagnosis and risk stratification in patients with anti-RNP autoimmunity. *Lupus*. 2015; 24(10):1057-66. (**GSE61635**)
6. Banchereau R, Hong S, Cantarel B, Baldwin N, Baisch J, Edens M, et al. Personalized immunomonitoring uncovers molecular networks that stratify lupus patients. *Cell*. 2016; 165(3):551-65. (**GSE65391**)
7. Welcher AA, Boedigheimer M, Kivitz AJ, Amoura Z, Buyon J, Rudinskaya A, et al. Blockade of interferon- $\gamma$  normalizes interferon-regulated gene expression and serum CXCL10 levels in patients with systemic lupus erythematosus. *Arthritis & Rheumatology*. 2015; 67(10):2713-22. (**GSE78193**)

**Supplement 1. Table 2. CD expression characteristics with the SLE Compendium**

| Cluster of Differentiation | Entrez ID | 1 <sup>st</sup> quartile | Median | Mean   | Standard error | 3 <sup>rd</sup> quartile |
|----------------------------|-----------|--------------------------|--------|--------|----------------|--------------------------|
| CD1A                       | 909       | 0.2877                   | 0.4131 | 0.4306 | 0.0049         | 0.5418                   |
| CD1B                       | 910       | 0.0429                   | 0.2810 | 0.2859 | 0.0067         | 0.4699                   |
| CD1C                       | 911       | 0.4298                   | 0.4847 | 0.5165 | 0.0046         | 0.6191                   |
| CD1D                       | 912       | 0.4725                   | 0.5790 | 0.5669 | 0.0047         | 0.6692                   |
| CD1E                       | 913       | 0.0808                   | 0.3933 | 0.3550 | 0.0072         | 0.5690                   |
| CD2                        | 914       | 0.5507                   | 0.6660 | 0.6479 | 0.0045         | 0.7567                   |
| CD3D                       | 915       | 0.5816                   | 0.6579 | 0.6517 | 0.0037         | 0.7393                   |
| CD3E                       | 916       | 0.3478                   | 0.4621 | 0.4756 | 0.0050         | 0.5963                   |
| CD3G                       | 917       | 0.4454                   | 0.5510 | 0.5513 | 0.0045         | 0.6593                   |
| CD4                        | 920       | 0.4148                   | 0.5369 | 0.5325 | 0.0055         | 0.6743                   |
| CD5                        | 921       | 0.4914                   | 0.6062 | 0.5890 | 0.0047         | 0.7053                   |
| CD6                        | 923       | 0.5397                   | 0.6628 | 0.6438 | 0.0048         | 0.7728                   |
| CD7                        | 924       | 0.4072                   | 0.5400 | 0.5347 | 0.0052         | 0.6661                   |
| CD8A                       | 925       | 0.4365                   | 0.5553 | 0.5594 | 0.0049         | 0.6907                   |
| CD8B                       | 926       | 0.3612                   | 0.4399 | 0.4622 | 0.0044         | 0.5634                   |
| CD9                        | 928       | 0.2634                   | 0.4078 | 0.4108 | 0.0056         | 0.5510                   |
| CD10                       | 4311      | 0.3475                   | 0.4486 | 0.4754 | 0.0053         | 0.5955                   |
| CD11A                      | 3683      | 0.3848                   | 0.4876 | 0.4934 | 0.0047         | 0.5992                   |
| CD11B                      | 3684      | 0.4461                   | 0.5705 | 0.5660 | 0.0049         | 0.6893                   |
| CD11C                      | 3687      | 0.3237                   | 0.4352 | 0.4567 | 0.0051         | 0.5685                   |
| CD13                       | 290       | 0.4166                   | 0.5281 | 0.5234 | 0.0048         | 0.6361                   |
| CD14                       | 929       | 0.4937                   | 0.6117 | 0.5974 | 0.0047         | 0.7128                   |
| CD15                       | 2526      | 0.3056                   | 0.3946 | 0.4032 | 0.0041         | 0.4802                   |
| CD16B                      | 2215      | 0.6375                   | 0.7064 | 0.6900 | 0.0039         | 0.7744                   |
| CD18                       | 3689      | 0.2797                   | 0.3487 | 0.3843 | 0.0047         | 0.4451                   |
| CD19                       | 930       | 0.3390                   | 0.4880 | 0.4796 | 0.0057         | 0.6270                   |
| CD20                       | 931       | 0.4250                   | 0.5417 | 0.5368 | 0.0045         | 0.6543                   |
| CD21                       | 1380      | 0.4267                   | 0.5343 | 0.5282 | 0.0051         | 0.6581                   |
| CD22                       | 933       | 0.2415                   | 0.3850 | 0.3967 | 0.0051         | 0.5316                   |
| CD23                       | 2208      | 0.3318                   | 0.3686 | 0.4186 | 0.0052         | 0.5378                   |
| CD25                       | 3559      | 0.3142                   | 0.3952 | 0.4048 | 0.0042         | 0.4792                   |
| CD26                       | 1803      | 0.3800                   | 0.4833 | 0.4955 | 0.0048         | 0.6179                   |

|       |       |        |        |        |        |        |
|-------|-------|--------|--------|--------|--------|--------|
| CD27  | 939   | 0.4434 | 0.5544 | 0.5574 | 0.0049 | 0.6732 |
| CD28  | 940   | 0.5163 | 0.6076 | 0.5988 | 0.0042 | 0.6912 |
| CD30  | 943   | 0.4002 | 0.5314 | 0.5164 | 0.0049 | 0.6416 |
| CD31  | 5175  | 0.5092 | 0.6208 | 0.6047 | 0.0047 | 0.7196 |
| CD33  | 945   | 0.4531 | 0.5563 | 0.5536 | 0.0045 | 0.6564 |
| CD34  | 947   | 0.0888 | 0.2385 | 0.3193 | 0.0072 | 0.5643 |
| CD35  | 1378  | 0.2969 | 0.3960 | 0.4141 | 0.0048 | 0.5101 |
| CD36  | 948   | 0.5503 | 0.6644 | 0.6425 | 0.0046 | 0.7539 |
| CD37  | 951   | 0.4015 | 0.5194 | 0.5212 | 0.0048 | 0.6362 |
| CD38  | 952   | 0.2643 | 0.3496 | 0.3615 | 0.0042 | 0.4382 |
| CD39  | 953   | 0.4219 | 0.5449 | 0.5388 | 0.0048 | 0.6571 |
| CD40  | 958   | 0.4295 | 0.5178 | 0.5264 | 0.0049 | 0.6269 |
| CD41  | 3674  | 0.2975 | 0.4246 | 0.4302 | 0.0051 | 0.5517 |
| CD42A | 2815  | 0.4343 | 0.5542 | 0.5424 | 0.0049 | 0.6606 |
| CD42B | 2811  | 0.2818 | 0.4168 | 0.4206 | 0.0055 | 0.5492 |
| CD43  | 6693  | 0.4208 | 0.5204 | 0.5248 | 0.0046 | 0.6187 |
| CD44  | 960   | 0.4447 | 0.5468 | 0.5461 | 0.0044 | 0.6526 |
| CD45  | 5788  | 0.4831 | 0.5932 | 0.5897 | 0.0049 | 0.7097 |
| CD46  | 4179  | 0.3236 | 0.4766 | 0.4776 | 0.0056 | 0.6164 |
| CD47  | 961   | 0.3421 | 0.4422 | 0.4758 | 0.0051 | 0.6049 |
| CD48  | 962   | 0.5302 | 0.6346 | 0.6206 | 0.0045 | 0.7340 |
| CD49B | 3673  | 0.0505 | 0.0692 | 0.2157 | 0.0057 | 0.3656 |
| CD49C | 3675  | 0.0874 | 0.1118 | 0.2535 | 0.0065 | 0.4513 |
| CD49D | 3676  | 0.4888 | 0.5827 | 0.5825 | 0.0044 | 0.6847 |
| CD49E | 3678  | 0.4647 | 0.5786 | 0.5710 | 0.0044 | 0.6751 |
| CD49F | 3655  | 0.4701 | 0.5373 | 0.5076 | 0.0043 | 0.5757 |
| CD50  | 3385  | 0.4232 | 0.5380 | 0.5340 | 0.0050 | 0.6507 |
| CD51  | 3685  | 0.4443 | 0.5668 | 0.5565 | 0.0046 | 0.6670 |
| CD52  | 1043  | 0.5706 | 0.6869 | 0.6614 | 0.0046 | 0.7794 |
| CD53  | 963   | 0.4696 | 0.5772 | 0.5712 | 0.0045 | 0.6843 |
| CD54  | 3383  | 0.4393 | 0.4668 | 0.4858 | 0.0041 | 0.5453 |
| CD55  | 1604  | 0.3661 | 0.4807 | 0.4874 | 0.0048 | 0.5927 |
| CD56  | 4684  | 0.4322 | 0.5026 | 0.4613 | 0.0043 | 0.5338 |
| CD57  | 27087 | 0.0730 | 0.1057 | 0.2654 | 0.0066 | 0.4719 |
| CD58  | 965   | 0.4668 | 0.5758 | 0.5660 | 0.0045 | 0.6744 |

|       |        |        |        |        |        |        |
|-------|--------|--------|--------|--------|--------|--------|
| CD59  | 966    | 0.3650 | 0.4031 | 0.4285 | 0.0038 | 0.4862 |
| CD61  | 3690   | 0.3290 | 0.4558 | 0.4583 | 0.0051 | 0.5751 |
| CD62E | 6401   | 0.0770 | 0.0991 | 0.2399 | 0.0067 | 0.4248 |
| CD62L | 6402   | 0.7253 | 0.8035 | 0.7461 | 0.0049 | 0.8507 |
| CD62P | 6403   | 0.3499 | 0.3783 | 0.4157 | 0.0043 | 0.4860 |
| CD63  | 967    | 0.3594 | 0.4536 | 0.4675 | 0.0049 | 0.5648 |
| CD66A | 634    | 0.2915 | 0.3878 | 0.4013 | 0.0045 | 0.5012 |
| CD66B | 1088   | 0.1388 | 0.2813 | 0.3267 | 0.0057 | 0.4510 |
| CD66C | 4680   | 0.1392 | 0.2528 | 0.2982 | 0.0058 | 0.4030 |
| CD66D | 1084   | 0.4487 | 0.5544 | 0.5490 | 0.0047 | 0.6591 |
| CD66E | 1048   | 0.0563 | 0.0711 | 0.1684 | 0.0054 | 0.2331 |
| CD66F | 5669   | 0.0613 | 0.0806 | 0.2017 | 0.0063 | 0.3510 |
| CD68  | 968    | 0.3514 | 0.4872 | 0.4973 | 0.0055 | 0.6275 |
| CD69  | 969    | 0.3740 | 0.4842 | 0.4911 | 0.0048 | 0.6100 |
| CD70  | 970    | 0.2230 | 0.2760 | 0.3463 | 0.0050 | 0.4596 |
| CD71  | 7037   | 0.3510 | 0.4346 | 0.4396 | 0.0038 | 0.5131 |
| CD72  | 971    | 0.3064 | 0.4160 | 0.4328 | 0.0049 | 0.5519 |
| CD73  | 4907   | 0.4912 | 0.5631 | 0.5156 | 0.0051 | 0.5975 |
| CD74  | 972    | 0.4180 | 0.5258 | 0.5255 | 0.0048 | 0.6352 |
| CD79A | 973    | 0.3382 | 0.4927 | 0.4903 | 0.0055 | 0.6265 |
| CD79B | 974    | 0.3125 | 0.4823 | 0.4761 | 0.0058 | 0.6293 |
| CD80  | 941    | 0.0514 | 0.1602 | 0.2415 | 0.0063 | 0.4027 |
| CD81  | 975    | 0.5014 | 0.6132 | 0.6063 | 0.0045 | 0.7234 |
| CD82  | 3732   | 0.3397 | 0.4747 | 0.4727 | 0.0051 | 0.5940 |
| CD83  | 9308   | 0.3623 | 0.4244 | 0.4407 | 0.0040 | 0.5118 |
| CD84  | 8832   | 0.3429 | 0.4340 | 0.4523 | 0.0045 | 0.5422 |
| CD85A | 11025  | 0.6931 | 0.7578 | 0.7279 | 0.0038 | 0.8070 |
| CD85C | 10990  | 0.0850 | 0.4020 | 0.3630 | 0.0067 | 0.5531 |
| CD85D | 10288  | 0.3225 | 0.4431 | 0.4598 | 0.0053 | 0.5779 |
| CD85F | 353514 | 0.3677 | 0.5059 | 0.5027 | 0.0053 | 0.6397 |
| CD85G | 23547  | 0.4090 | 0.4471 | 0.4459 | 0.0041 | 0.4722 |
| CD85H | 11027  | 0.5010 | 0.6070 | 0.5915 | 0.0044 | 0.7014 |
| CD85J | 10859  | 0.3159 | 0.4139 | 0.4257 | 0.0046 | 0.5250 |
| CD85K | 11006  | 0.4451 | 0.5721 | 0.5530 | 0.0049 | 0.6757 |
| CD85M | 79166  | 0.0732 | 0.0925 | 0.1941 | 0.0058 | 0.2385 |

|        |        |        |        |        |        |        |
|--------|--------|--------|--------|--------|--------|--------|
| CD86   | 942    | 0.4575 | 0.5648 | 0.5551 | 0.0046 | 0.6661 |
| CD87   | 5329   | 0.3865 | 0.5033 | 0.5014 | 0.0048 | 0.6157 |
| CD88   | 728    | 0.4475 | 0.5733 | 0.5605 | 0.0048 | 0.6804 |
| CD89   | 2204   | 0.2910 | 0.3992 | 0.4156 | 0.0049 | 0.5191 |
| CD90   | 7070   | 0.4564 | 0.5648 | 0.5543 | 0.0046 | 0.6762 |
| CD91   | 4035   | 0.3538 | 0.3758 | 0.4351 | 0.0045 | 0.5273 |
| CD92   | 23446  | 0.2598 | 0.3575 | 0.3815 | 0.0048 | 0.4715 |
| CD93   | 22918  | 0.5621 | 0.6614 | 0.6459 | 0.0043 | 0.7482 |
| CD94   | 3824   | 0.3531 | 0.4708 | 0.4715 | 0.0051 | 0.5947 |
| CD95   | 355    | 0.2904 | 0.3998 | 0.4154 | 0.0050 | 0.5267 |
| CD96   | 10225  | 0.4582 | 0.5713 | 0.5583 | 0.0046 | 0.6695 |
| CD97   | 976    | 0.6236 | 0.6971 | 0.6633 | 0.0046 | 0.7619 |
| CD98   | 6520   | 0.3606 | 0.4524 | 0.4941 | 0.0051 | 0.5967 |
| CD99   | 4267   | 0.4504 | 0.5680 | 0.5712 | 0.0050 | 0.6912 |
| CD100  | 10507  | 0.3385 | 0.4490 | 0.4607 | 0.0050 | 0.5779 |
| CD101  | 9398   | 0.2724 | 0.3138 | 0.3420 | 0.0047 | 0.3551 |
| CD102  | 3384   | 0.4566 | 0.5730 | 0.5620 | 0.0049 | 0.6810 |
| CD103  | 3682   | 0.4387 | 0.5648 | 0.5500 | 0.0050 | 0.6722 |
| CD104  | 3691   | 0.0816 | 0.1027 | 0.2067 | 0.0057 | 0.2799 |
| CD105  | 2022   | 0.3528 | 0.3820 | 0.4359 | 0.0046 | 0.5444 |
| CD106  | 7412   | 0.0866 | 0.1180 | 0.2716 | 0.0065 | 0.4658 |
| CD107A | 3916   | 0.4480 | 0.5595 | 0.5639 | 0.0050 | 0.6827 |
| CD107B | 3920   | 0.4848 | 0.6087 | 0.5944 | 0.0050 | 0.7172 |
| CD108  | 8482   | 0.0407 | 0.0579 | 0.2029 | 0.0058 | 0.3577 |
| CD109  | 135228 | 0.0000 | 0.0000 | 0.1030 | 0.0052 | 0.1858 |
| CD110  | 4352   | 0.3177 | 0.4492 | 0.4495 | 0.0054 | 0.5842 |
| CD111  | 5818   | 0.0928 | 0.1236 | 0.2683 | 0.0066 | 0.4653 |
| CD112  | 5819   | 0.3224 | 0.4273 | 0.4002 | 0.0044 | 0.4934 |
| CD113  | 25945  | 0.0681 | 0.0913 | 0.2426 | 0.0064 | 0.4338 |
| CD114  | 1441   | 0.5753 | 0.6686 | 0.6467 | 0.0043 | 0.7422 |
| CD115  | 1436   | 0.5198 | 0.6335 | 0.6169 | 0.0047 | 0.7290 |
| CD116  | 1438   | 0.4898 | 0.6032 | 0.5869 | 0.0048 | 0.7041 |
| CD117  | 3815   | 0.3513 | 0.4393 | 0.4171 | 0.0048 | 0.5119 |
| CD118  | 3977   | 0.0659 | 0.0853 | 0.1629 | 0.0050 | 0.1796 |
| CD119  | 3459   | 0.4095 | 0.5120 | 0.5233 | 0.0048 | 0.6231 |

|        |      |        |        |        |        |        |
|--------|------|--------|--------|--------|--------|--------|
| CD120A | 7132 | 0.5005 | 0.6198 | 0.6110 | 0.0047 | 0.7361 |
| CD120B | 7133 | 0.4559 | 0.5577 | 0.5536 | 0.0043 | 0.6504 |
| CD121A | 3554 | 0.0190 | 0.0244 | 0.1232 | 0.0049 | 0.1807 |
| CD121B | 7850 | 0.2424 | 0.3407 | 0.3743 | 0.0052 | 0.4773 |
| CD122  | 3560 | 0.3886 | 0.5172 | 0.5126 | 0.0052 | 0.6399 |
| CD123  | 3563 | 0.3700 | 0.4103 | 0.3952 | 0.0043 | 0.4318 |
| CD124  | 3566 | 0.2042 | 0.2736 | 0.3085 | 0.0043 | 0.3769 |
| CD125  | 3568 | 0.3568 | 0.4262 | 0.4325 | 0.0041 | 0.5189 |
| CD126  | 3570 | 0.3755 | 0.4928 | 0.4965 | 0.0051 | 0.6100 |
| CD127  | 3575 | 0.5461 | 0.6411 | 0.6247 | 0.0040 | 0.7205 |
| CD130  | 3572 | 0.3375 | 0.4164 | 0.4160 | 0.0041 | 0.5015 |
| CD131  | 1439 | 0.4445 | 0.5347 | 0.5372 | 0.0041 | 0.6284 |
| CD132  | 3561 | 0.3418 | 0.4780 | 0.4704 | 0.0053 | 0.5944 |
| CD133  | 8842 | 0.0488 | 0.0621 | 0.1466 | 0.0050 | 0.1944 |
| CD134  | 7293 | 0.3926 | 0.4894 | 0.4966 | 0.0045 | 0.5970 |
| CD135  | 2322 | 0.0291 | 0.0373 | 0.1480 | 0.0057 | 0.2172 |
| CD136  | 4486 | 0.0000 | 0.0000 | 0.1381 | 0.0070 | 0.1647 |
| CD137  | 3604 | 0.3478 | 0.4435 | 0.4429 | 0.0045 | 0.5422 |
| CD138  | 6382 | 0.3120 | 0.3694 | 0.3835 | 0.0044 | 0.4721 |
| CD140A | 5156 | 0.0972 | 0.1263 | 0.2032 | 0.0053 | 0.2115 |
| CD140B | 5159 | 0.3238 | 0.3561 | 0.4020 | 0.0049 | 0.4690 |
| CD141  | 7056 | 0.2608 | 0.2839 | 0.3207 | 0.0043 | 0.3411 |
| CD142  | 2152 | 0.0865 | 0.1460 | 0.2883 | 0.0067 | 0.4879 |
| CD143  | 1636 | 0.0946 | 0.1203 | 0.2143 | 0.0056 | 0.2871 |
| CD144  | 1003 | 0.1160 | 0.1465 | 0.2313 | 0.0054 | 0.2808 |
| CD146  | 4162 | 0.0703 | 0.0887 | 0.1900 | 0.0058 | 0.2591 |
| CD147  | 682  | 0.3429 | 0.4740 | 0.4832 | 0.0055 | 0.6138 |
| CD148  | 5795 | 0.4195 | 0.5279 | 0.5285 | 0.0045 | 0.6324 |
| CD150  | 6504 | 0.4758 | 0.6168 | 0.5923 | 0.0048 | 0.7180 |
| CD151  | 977  | 0.3240 | 0.4176 | 0.4358 | 0.0045 | 0.5333 |
| CD152  | 1493 | 0.5168 | 0.5735 | 0.5624 | 0.0046 | 0.6629 |
| CD153  | 944  | 0.2956 | 0.3934 | 0.3992 | 0.0045 | 0.4975 |
| CD154  | 959  | 0.3712 | 0.4881 | 0.4943 | 0.0053 | 0.6246 |
| CD155  | 5817 | 0.4646 | 0.5331 | 0.5162 | 0.0043 | 0.5983 |
| CD156A | 101  | 0.4237 | 0.5389 | 0.5380 | 0.0050 | 0.6521 |

|        |        |        |        |        |        |        |
|--------|--------|--------|--------|--------|--------|--------|
| CD156C | 102    | 0.4647 | 0.5321 | 0.5452 | 0.0039 | 0.6233 |
| CD157  | 683    | 0.3466 | 0.4645 | 0.4743 | 0.0051 | 0.5949 |
| CD158E | 3811   | 0.3143 | 0.4080 | 0.4189 | 0.0043 | 0.5066 |
| CD158I | 3809   | 0.0000 | 0.0000 | 0.1134 | 0.0060 | 0.1442 |
| CD158K | 3812   | 0.3227 | 0.4613 | 0.4677 | 0.0053 | 0.6060 |
| CD160  | 11126  | 0.3611 | 0.4916 | 0.4939 | 0.0048 | 0.6118 |
| CD161  | 3820   | 0.4143 | 0.5328 | 0.5259 | 0.0049 | 0.6424 |
| CD162  | 6404   | 0.3945 | 0.5122 | 0.5080 | 0.0047 | 0.6193 |
| CD163  | 9332   | 0.2490 | 0.3195 | 0.3529 | 0.0043 | 0.4156 |
| CD164  | 8763   | 0.3328 | 0.4739 | 0.4945 | 0.0050 | 0.6267 |
| CD166  | 214    | 0.3513 | 0.4532 | 0.4597 | 0.0048 | 0.5668 |
| CD167A | 780    | 0.3657 | 0.4349 | 0.4419 | 0.0043 | 0.5196 |
| CD167B | 4921   | 0.0842 | 0.1105 | 0.2371 | 0.0063 | 0.3681 |
| CD168  | 3161   | 0.0473 | 0.1676 | 0.2173 | 0.0056 | 0.3415 |
| CD169  | 6614   | 0.0290 | 0.1402 | 0.2449 | 0.0072 | 0.4275 |
| CD170  | 8778   | 0.4018 | 0.5207 | 0.5186 | 0.0049 | 0.6382 |
| CD171  | 3897   | 0.0649 | 0.0819 | 0.2025 | 0.0061 | 0.3430 |
| CD172A | 140885 | 0.4620 | 0.5746 | 0.5634 | 0.0045 | 0.6771 |
| CD172G | 55423  | 0.3642 | 0.4814 | 0.4895 | 0.0049 | 0.6088 |
| CD174  | 2525   | 0.0000 | 0.0000 | 0.1298 | 0.0063 | 0.2475 |
| CD177  | 57126  | 0.0226 | 0.0311 | 0.1232 | 0.0047 | 0.1642 |
| CD178  | 356    | 0.4686 | 0.5054 | 0.5078 | 0.0044 | 0.5625 |
| CD179A | 7441   | 0.0409 | 0.0523 | 0.1288 | 0.0045 | 0.1056 |
| CD179B | 3543   | 0.5017 | 0.5881 | 0.5847 | 0.0044 | 0.6935 |
| CD180  | 4064   | 0.0896 | 0.3274 | 0.3306 | 0.0066 | 0.5309 |
| CD181  | 3577   | 0.5136 | 0.6410 | 0.6177 | 0.0049 | 0.7477 |
| CD182  | 3579   | 0.5253 | 0.6211 | 0.6064 | 0.0041 | 0.7002 |
| CD183  | 2833   | 0.4208 | 0.5164 | 0.5323 | 0.0046 | 0.6433 |
| CD184  | 7852   | 0.4024 | 0.4948 | 0.5076 | 0.0045 | 0.6019 |
| CD185  | 643    | 0.3929 | 0.5298 | 0.5033 | 0.0047 | 0.6156 |
| CD186  | 10663  | 0.4005 | 0.4329 | 0.4296 | 0.0042 | 0.4769 |
| CD191  | 1230   | 0.4444 | 0.5803 | 0.5620 | 0.0051 | 0.6919 |
| CD193  | 1232   | 0.4625 | 0.5722 | 0.5543 | 0.0049 | 0.6712 |
| CD194  | 1233   | 0.0459 | 0.0605 | 0.1963 | 0.0064 | 0.3592 |
| CD195  | 1234   | 0.3732 | 0.4295 | 0.4471 | 0.0042 | 0.5207 |



|         |       |        |        |        |        |        |
|---------|-------|--------|--------|--------|--------|--------|
| CD196   | 1235  | 0.3381 | 0.4530 | 0.4578 | 0.0050 | 0.5753 |
| CD197   | 1236  | 0.4787 | 0.6108 | 0.5969 | 0.0050 | 0.7204 |
| CD199   | 10803 | 0.3392 | 0.4020 | 0.3840 | 0.0038 | 0.4403 |
| CD200   | 4345  | 0.0567 | 0.0819 | 0.2404 | 0.0062 | 0.4174 |
| CD201   | 10544 | 0.2714 | 0.3164 | 0.3688 | 0.0048 | 0.4618 |
| CD202B  | 7010  | 0.0674 | 0.2322 | 0.2739 | 0.0064 | 0.4369 |
| CD203C  | 5169  | 0.0818 | 0.1037 | 0.1722 | 0.0046 | 0.1822 |
| CD204   | 4481  | 0.0663 | 0.0921 | 0.2563 | 0.0064 | 0.4345 |
| CD205   | 4065  | 0.4357 | 0.5313 | 0.5450 | 0.0040 | 0.6345 |
| CD206   | 4360  | 0.0625 | 0.0808 | 0.1978 | 0.0054 | 0.3369 |
| CD207   | 50489 | 0.0724 | 0.0917 | 0.2102 | 0.0060 | 0.3352 |
| CD208   | 27074 | 0.2642 | 0.3410 | 0.3676 | 0.0043 | 0.4326 |
| CD209   | 30835 | 0.0000 | 0.0000 | 0.1070 | 0.0056 | 0.1425 |
| CD210   | 3587  | 0.4240 | 0.5205 | 0.5219 | 0.0044 | 0.6222 |
| CDW210B | 3588  | 0.5186 | 0.6042 | 0.5920 | 0.0041 | 0.6832 |
| CD212   | 3594  | 0.4045 | 0.5213 | 0.5310 | 0.0049 | 0.6489 |
| CD213A1 | 3597  | 0.4451 | 0.5561 | 0.5489 | 0.0048 | 0.6578 |
| CD213A2 | 3598  | 0.0658 | 0.0828 | 0.1504 | 0.0045 | 0.1479 |
| CD215   | 3601  | 0.0744 | 0.0945 | 0.1943 | 0.0057 | 0.2438 |
| CD217A  | 23765 | 0.3543 | 0.4847 | 0.4848 | 0.0053 | 0.6106 |
| CD218A  | 8809  | 0.2310 | 0.3237 | 0.3634 | 0.0053 | 0.4489 |
| CD218B  | 8807  | 0.3551 | 0.4772 | 0.4696 | 0.0049 | 0.5795 |
| CD220   | 3643  | 0.0558 | 0.0707 | 0.1690 | 0.0054 | 0.2508 |
| CD221   | 3480  | 0.3040 | 0.3717 | 0.3908 | 0.0041 | 0.4642 |
| CD222   | 3482  | 0.3865 | 0.4883 | 0.4928 | 0.0047 | 0.5964 |
| CD223   | 3902  | 0.3208 | 0.4433 | 0.4631 | 0.0048 | 0.5783 |
| CD225   | 8519  | 0.6660 | 0.7433 | 0.7008 | 0.0047 | 0.7958 |
| CD226   | 10666 | 0.4493 | 0.5699 | 0.5684 | 0.0046 | 0.6877 |
| CD227   | 4582  | 0.2539 | 0.2935 | 0.3209 | 0.0038 | 0.3633 |
| CD228   | 4241  | 0.0977 | 0.1279 | 0.2904 | 0.0067 | 0.5091 |
| CD229   | 4063  | 0.4910 | 0.6255 | 0.6065 | 0.0049 | 0.7315 |
| CD230   | 5621  | 0.4669 | 0.5790 | 0.5668 | 0.0047 | 0.6783 |
| CD231   | 7102  | 0.0694 | 0.1267 | 0.1527 | 0.0038 | 0.2059 |
| CD232   | 10154 | 0.3927 | 0.5165 | 0.5161 | 0.0050 | 0.6311 |
| CD233   | 6521  | 0.3742 | 0.4941 | 0.4807 | 0.0052 | 0.5946 |

|         |        |        |        |        |        |        |
|---------|--------|--------|--------|--------|--------|--------|
| CD234   | 2532   | 0.2298 | 0.2971 | 0.3469 | 0.0051 | 0.4538 |
| CD235A  | 2993   | 0.0264 | 0.0336 | 0.0949 | 0.0040 | 0.1100 |
| CD235B  | 2994   | 0.2290 | 0.3563 | 0.3744 | 0.0056 | 0.5058 |
| CD236   | 2995   | 0.4735 | 0.5625 | 0.5534 | 0.0043 | 0.6455 |
| CD238   | 3792   | 0.2072 | 0.2995 | 0.3301 | 0.0045 | 0.4292 |
| CD239   | 4059   | 0.1152 | 0.1459 | 0.2366 | 0.0059 | 0.2638 |
| CD240CE | 6006   | 0.1861 | 0.2264 | 0.2542 | 0.0041 | 0.2675 |
| CD240D  | 6007   | 0.0252 | 0.0322 | 0.1400 | 0.0050 | 0.2184 |
| CD241   | 6005   | 0.0282 | 0.0361 | 0.1449 | 0.0051 | 0.2316 |
| CD242   | 3386   | 0.3286 | 0.3667 | 0.3986 | 0.0041 | 0.4481 |
| CD243   | 5243   | 0.3582 | 0.4697 | 0.4731 | 0.0050 | 0.5995 |
| CD244   | 51744  | 0.5086 | 0.5471 | 0.5625 | 0.0044 | 0.6383 |
| CD246   | 238    | 0.0540 | 0.0687 | 0.1963 | 0.0064 | 0.3157 |
| CD247   | 919    | 0.5804 | 0.6672 | 0.6598 | 0.0039 | 0.7547 |
| CD248   | 57124  | 0.3734 | 0.4714 | 0.4798 | 0.0047 | 0.5894 |
| CD249   | 2028   | 0.0632 | 0.0860 | 0.2344 | 0.0064 | 0.4235 |
| CD252   | 7292   | 0.2576 | 0.3412 | 0.3685 | 0.0047 | 0.4500 |
| CD253   | 8743   | 0.3552 | 0.4537 | 0.4613 | 0.0046 | 0.5625 |
| CD254   | 8600   | 0.0778 | 0.1061 | 0.2277 | 0.0060 | 0.3639 |
| CD257   | 10673  | 0.4844 | 0.6047 | 0.5812 | 0.0048 | 0.6959 |
| CD258   | 8740   | 0.3544 | 0.5111 | 0.5044 | 0.0057 | 0.6435 |
| CD262   | 8795   | 0.3919 | 0.5091 | 0.5013 | 0.0049 | 0.6212 |
| CD263   | 8794   | 0.3718 | 0.4614 | 0.4833 | 0.0048 | 0.5685 |
| CD264   | 8793   | 0.0537 | 0.0768 | 0.2575 | 0.0069 | 0.4421 |
| CD265   | 8792   | 0.0607 | 0.0770 | 0.1617 | 0.0049 | 0.2216 |
| CD266   | 51330  | 0.2305 | 0.2770 | 0.3496 | 0.0051 | 0.4592 |
| CD267   | 23495  | 0.3001 | 0.3167 | 0.3391 | 0.0042 | 0.3625 |
| CD269   | 608    | 0.2179 | 0.3244 | 0.3582 | 0.0049 | 0.4692 |
| CD270   | 8764   | 0.3937 | 0.5311 | 0.5315 | 0.0053 | 0.6555 |
| CD271   | 4804   | 0.0484 | 0.0626 | 0.1994 | 0.0059 | 0.3569 |
| CD272   | 151888 | 0.3200 | 0.4516 | 0.4583 | 0.0049 | 0.5837 |
| CD273   | 80380  | 0.0000 | 0.0000 | 0.0919 | 0.0048 | 0.1376 |
| CD274   | 29126  | 0.0346 | 0.0441 | 0.1299 | 0.0049 | 0.1768 |
| CD276   | 80381  | 0.0618 | 0.0801 | 0.2286 | 0.0069 | 0.3964 |
| CD277   | 11119  | 0.3237 | 0.4063 | 0.4270 | 0.0044 | 0.5089 |

|        |        |        |        |        |        |        |
|--------|--------|--------|--------|--------|--------|--------|
| CD278  | 29851  | 0.4065 | 0.5303 | 0.5204 | 0.0051 | 0.6423 |
| CD279  | 5133   | 0.0390 | 0.0499 | 0.1709 | 0.0061 | 0.2742 |
| CD280  | 9902   | 0.0455 | 0.2031 | 0.2347 | 0.0058 | 0.3882 |
| CD281  | 7096   | 0.3368 | 0.4997 | 0.4942 | 0.0060 | 0.6577 |
| CD282  | 7097   | 0.2973 | 0.4055 | 0.4288 | 0.0050 | 0.5405 |
| CD283  | 7098   | 0.0974 | 0.1225 | 0.2435 | 0.0059 | 0.3783 |
| CD284  | 7099   | 0.3382 | 0.4540 | 0.4687 | 0.0051 | 0.5907 |
| CD286  | 10333  | 0.3518 | 0.4914 | 0.4930 | 0.0054 | 0.6335 |
| CD288  | 51311  | 0.4240 | 0.5298 | 0.5305 | 0.0048 | 0.6437 |
| CD289  | 54106  | 0.3317 | 0.3715 | 0.3772 | 0.0042 | 0.3984 |
| CD290  | 81793  | 0.4269 | 0.5439 | 0.5341 | 0.0046 | 0.6416 |
| CD292  | 657    | 0.0928 | 0.1299 | 0.2889 | 0.0065 | 0.4903 |
| CDW293 | 658    | 0.0771 | 0.1042 | 0.2290 | 0.0054 | 0.3880 |
| CD294  | 11251  | 0.2721 | 0.2885 | 0.3274 | 0.0045 | 0.3827 |
| CD295  | 3953   | 0.4433 | 0.5012 | 0.5038 | 0.0041 | 0.5759 |
| CD296  | 417    | 0.3463 | 0.3758 | 0.4412 | 0.0044 | 0.5359 |
| CD297  | 420    | 0.0485 | 0.0637 | 0.2164 | 0.0062 | 0.3780 |
| CD298  | 483    | 0.3326 | 0.4407 | 0.4449 | 0.0047 | 0.5547 |
| CD299  | 10332  | 0.0339 | 0.0427 | 0.1953 | 0.0067 | 0.3262 |
| CD300A | 11314  | 0.4993 | 0.6021 | 0.5909 | 0.0045 | 0.6974 |
| CD300C | 10871  | 0.4161 | 0.5457 | 0.5341 | 0.0051 | 0.6624 |
| CD301  | 10462  | 0.4865 | 0.5319 | 0.5278 | 0.0044 | 0.6119 |
| CD304  | 8829   | 0.0821 | 0.1085 | 0.2568 | 0.0065 | 0.4547 |
| CD305  | 3903   | 0.3634 | 0.4618 | 0.4744 | 0.0044 | 0.5776 |
| CD306  | 3904   | 0.2039 | 0.2878 | 0.3070 | 0.0044 | 0.3783 |
| CD307A | 115350 | 0.0862 | 0.1091 | 0.1929 | 0.0053 | 0.2121 |
| CD307B | 79368  | 0.3870 | 0.5031 | 0.4953 | 0.0047 | 0.6056 |
| CD307C | 115352 | 0.4221 | 0.5118 | 0.5191 | 0.0044 | 0.6154 |
| CD307D | 83417  | 0.0523 | 0.0663 | 0.1390 | 0.0046 | 0.1500 |
| CD307E | 83416  | 0.2651 | 0.3560 | 0.3732 | 0.0044 | 0.4562 |
| CD308  | 2321   | 0.1455 | 0.1845 | 0.2555 | 0.0054 | 0.2298 |
| CD309  | 3791   | 0.0792 | 0.1003 | 0.1694 | 0.0045 | 0.1944 |
| CD312  | 30817  | 0.4273 | 0.5262 | 0.5254 | 0.0046 | 0.6323 |
| CD315  | 5738   | 0.0863 | 0.1089 | 0.1899 | 0.0050 | 0.2524 |
| CD316  | 93185  | 0.1475 | 0.5214 | 0.4480 | 0.0070 | 0.6486 |

|       |        |        |        |        |        |        |
|-------|--------|--------|--------|--------|--------|--------|
| CD317 | 684    | 0.4043 | 0.5385 | 0.5355 | 0.0054 | 0.6746 |
| CD318 | 64866  | 0.0909 | 0.2574 | 0.3190 | 0.0070 | 0.5427 |
| CD319 | 57823  | 0.3282 | 0.4635 | 0.4620 | 0.0048 | 0.5813 |
| CD320 | 51293  | 0.4975 | 0.5343 | 0.5618 | 0.0042 | 0.6432 |
| CD321 | 50848  | 0.3659 | 0.4622 | 0.4825 | 0.0047 | 0.5838 |
| CD322 | 58494  | 0.0578 | 0.0736 | 0.2095 | 0.0065 | 0.3546 |
| CD324 | 999    | 0.0830 | 0.1046 | 0.1786 | 0.0048 | 0.1851 |
| CD325 | 1000   | 0.1798 | 0.2115 | 0.2514 | 0.0044 | 0.2504 |
| CD326 | 4072   | 0.0374 | 0.0473 | 0.1227 | 0.0043 | 0.1631 |
| CD327 | 946    | 0.1152 | 0.4171 | 0.3868 | 0.0067 | 0.5691 |
| CD328 | 27036  | 0.3945 | 0.4399 | 0.4761 | 0.0041 | 0.5506 |
| CD329 | 27180  | 0.3735 | 0.4845 | 0.4874 | 0.0050 | 0.5985 |
| CD331 | 2260   | 0.0623 | 0.0815 | 0.1848 | 0.0057 | 0.2825 |
| CD332 | 2263   | 0.1078 | 0.1379 | 0.1910 | 0.0046 | 0.1685 |
| CD333 | 2261   | 0.0938 | 0.1198 | 0.2726 | 0.0064 | 0.4759 |
| CD334 | 2264   | 0.1030 | 0.1317 | 0.2100 | 0.0055 | 0.1767 |
| CD335 | 9437   | 0.0930 | 0.1176 | 0.2136 | 0.0056 | 0.3205 |
| CD336 | 9436   | 0.0406 | 0.0514 | 0.1626 | 0.0057 | 0.2566 |
| CD337 | 259197 | 0.3529 | 0.4894 | 0.4933 | 0.0046 | 0.6105 |
| CD338 | 9429   | 0.0000 | 0.0000 | 0.0981 | 0.0052 | 0.0917 |
| CD339 | 182    | 0.0478 | 0.0622 | 0.1937 | 0.0061 | 0.3276 |
| CD340 | 2064   | 0.4351 | 0.4842 | 0.4856 | 0.0044 | 0.5603 |
| CD344 | 8322   | 0.0000 | 0.0000 | 0.1506 | 0.0071 | 0.3500 |
| CD349 | 8326   | 0.0453 | 0.0572 | 0.1384 | 0.0049 | 0.1556 |
| CD350 | 11211  | 0.0368 | 0.0508 | 0.2128 | 0.0066 | 0.3945 |
| CD351 | 8395   | 0.2458 | 0.3268 | 0.3550 | 0.0044 | 0.4425 |
| CD353 | 56833  | 0.0388 | 0.0496 | 0.1923 | 0.0060 | 0.3306 |
| CD354 | 54210  | 0.4307 | 0.5610 | 0.5460 | 0.0052 | 0.6796 |
| CD355 | 56253  | 0.0568 | 0.0724 | 0.1858 | 0.0061 | 0.2610 |
| CD357 | 8784   | 0.0684 | 0.0893 | 0.2214 | 0.0061 | 0.3834 |
| CD358 | 27242  | 0.3184 | 0.3443 | 0.3893 | 0.0049 | 0.4793 |
| CD360 | 50615  | 0.5752 | 0.6418 | 0.6174 | 0.0045 | 0.7088 |
| CD361 | 2124   | 0.2721 | 0.3649 | 0.3831 | 0.0047 | 0.4680 |
| CD362 | 6383   | 0.2068 | 0.2533 | 0.3137 | 0.0050 | 0.3991 |
| CD363 | 1901   | 0.4069 | 0.5292 | 0.5368 | 0.0051 | 0.6612 |

|       |        |        |        |        |        |        |
|-------|--------|--------|--------|--------|--------|--------|
| CD364 | 221476 | 0.4220 | 0.4661 | 0.4906 | 0.0047 | 0.5900 |
| CD366 | 84868  | 0.4126 | 0.5178 | 0.5167 | 0.0046 | 0.6249 |
| CD367 | 50856  | 0.5184 | 0.6120 | 0.6118 | 0.0042 | 0.7098 |
| CD369 | 64581  | 0.4805 | 0.5836 | 0.5811 | 0.0049 | 0.6980 |

By default, CD gene expression was stratified at 20 and 80 percentiles, with low expression being between 0 and 20, average between 20 and 80, and high between 80 and 100. Two-tailed thresholds were labeled as 'aberrant' or 'non-aberrant', with 'aberrant' being further delineated as 'low' or 'high'.

**Supplement 2. Table 3. Clusters of differentiation gene expression requiring.** Feature transformation included threshold shifting (n=3) or binary dichotomization (n=85).

| Cluster of Differentiation | Entrez ID | Feature transformation  | Threshold | Figure # |
|----------------------------|-----------|-------------------------|-----------|----------|
| CD34                       | 947       | Dichotomization         | 0.18      | 38       |
| CD49B                      | 3673      | Dichotomization         | 0.1       | 54       |
| CD49C                      | 3675      | Dichotomization         | 0.18      | 55       |
| CD57                       | 27087     | Dichotomization         | 0.2       | 66       |
| CD62E                      | 6401      | Dichotomization         | 0.2       | 70       |
| CD62L                      | 6402      | Dichotomization         | 0.7       | 71       |
| CD66E                      | 1048      | Dichotomization         | 0.12      | 78       |
| CD66F                      | 5669      | Dichotomization         | 0.15      | 79       |
| CD72                       | 971       | First threshold shifted | 0.35      | 84       |
| CD80                       | 941       | Dichotomization         | 0.1       | 89       |
| CD85C                      | 10990     | Dichotomization         | 0.2       | 95       |
| CD85M                      | 79166     | Dichotomization         | 0.2       | 102      |
| CD91                       | 4035      | Dichotomization         | 0.45      | 108      |
| CD104                      | 3691      | Dichotomization         | 0.2       | 121      |
| CD105                      | 2022      | First threshold shifted | 0.3       | 122      |
| CD106                      | 7412      | Dichotomization         | 0.2       | 123      |
| CD108                      | 8482      | Dichotomization         | 0.15      | 126      |
| CD111                      | 5818      | Dichotomization         | 0.2       | 129      |
| CD113                      | 25945     | Dichotomization         | 0.15      | 131      |
| CD118                      | 3977      | Dichotomization         | 0.18      | 136      |
| CD121A                     | 3554      | Dichotomization         | 0.1       | 140      |
| CD133                      | 8842      | Dichotomization         | 0.1       | 151      |
| CD135                      | 2322      | Dichotomization         | 0.1       | 153      |
| CD140A                     | 5156      | Dichotomization         | 0.2       | 157      |
| CD142                      | 2152      | Dichotomization         | 0.2       | 160      |
| CD143                      | 1636      | Dichotomization         | 0.2       | 161      |
| CD144                      | 1003      | Dichotomization         | 0.25      | 162      |
| CD146                      | 4162      | Dichotomization         | 0.2       | 163      |
| CD154                      | 959       | Dichotomization         | 0.35      | 170      |
| CD167B                     | 4921      | Dichotomization         | 0.2       | 185      |
| CD168                      | 3161      | Dichotomization         | 0.15      | 186      |
| CD169                      | 6614      | Dichotomization         | 0.1       | 187      |
| CD171                      | 3897      | Dichotomization         | 0.2       | 189      |
| CD179A                     | 7441      | Dichotomization         | 0.15      | 195      |
| CD180                      | 4064      | Dichotomization         | 0.2       | 197      |

|         |        |                         |      |     |
|---------|--------|-------------------------|------|-----|
| CD194   | 1233   | Dichotomization         | 0.1  | 206 |
| CD200   | 4345   | Dichotomization         | 0.2  | 211 |
| CD202B  | 7010   | Dichotomization         | 0.15 | 213 |
| CD203C  | 5169   | Dichotomization         | 0.18 | 214 |
| CD204   | 4481   | Dichotomization         | 0.2  | 215 |
| CD206   | 4360   | Dichotomization         | 0.15 | 217 |
| CD207   | 50489  | Dichotomization         | 0.15 | 218 |
| CD213A2 | 3598   | Dichotomization         | 0.15 | 225 |
| CD215   | 3601   | Dichotomization         | 0.2  | 226 |
| CD220   | 3643   | Dichotomization         | 0.15 | 230 |
| CD225   | 8519   | Dichotomization         | 0.63 | 234 |
| CD228   | 4241   | Dichotomization         | 0.2  | 237 |
| CD231   | 7102   | First threshold shifted | 0.05 | 240 |
| CD235A  | 2993   | Dichotomization         | 0.07 | 244 |
| CD239   | 4059   | Dichotomization         | 0.2  | 248 |
| CD240D  | 6007   | Dichotomization         | 0.1  | 250 |
| CD241   | 6005   | Dichotomization         | 0.1  | 251 |
| CD246   | 238    | Dichotomization         | 0.2  | 255 |
| CD249   | 2028   | Dichotomization         | 0.2  | 258 |
| CD254   | 8600   | Dichotomization         | 0.2  | 261 |
| CD264   | 8793   | Dichotomization         | 0.15 | 266 |
| CD265   | 8792   | Dichotomization         | 0.15 | 267 |
| CD271   | 4804   | Dichotomization         | 0.15 | 272 |
| CD274   | 29126  | Dichotomization         | 0.1  | 275 |
| CD276   | 80381  | Dichotomization         | 0.2  | 276 |
| CD279   | 5133   | Dichotomization         | 0.1  | 279 |
| CD280   | 9902   | Dichotomization         | 0.15 | 280 |
| CD283   | 7098   | Dichotomization         | 0.2  | 283 |
| CD292   | 657    | Dichotomization         | 0.2  | 289 |
| CD297   | 420    | Dichotomization         | 0.2  | 290 |
| CD299   | 10332  | Dichotomization         | 0.1  | 294 |
| CD304   | 8829   | Dichotomization         | 0.2  | 296 |
| CD307A  | 115350 | Dichotomization         | 0.2  | 300 |
| CD307D  | 83417  | Dichotomization         | 0.1  | 303 |
| CD309   | 3791   | Dichotomization         | 0.2  | 306 |
| CD315   | 5738   | Dichotomization         | 0.2  | 309 |
| CD316   | 93185  | Dichotomization         | 0.2  | 311 |
| CD318   | 64866  | Dichotomization         | 0.2  | 312 |
| CD322   | 58494  | Dichotomization         | 0.15 | 314 |

|        |       |                 |      |     |
|--------|-------|-----------------|------|-----|
| CD324  | 999   | Dichotomization | 0.2  | 318 |
| CD326  | 4072  | Dichotomization | 0.1  | 319 |
| CD331  | 2260  | Dichotomization | 0.2  | 321 |
| CD333  | 2261  | Dichotomization | 0.2  | 325 |
| CD334  | 2264  | Dichotomization | 0.2  | 327 |
| CD335  | 9437  | Dichotomization | 0.2  | 328 |
| CD336  | 9436  | Dichotomization | 0.1  | 329 |
| CD339  | 182   | Dichotomization | 0.1  | 330 |
| CD349  | 8326  | Dichotomization | 0.1  | 333 |
| CD350  | 11211 | Dichotomization | 0.1  | 336 |
| CD353  | 56833 | Dichotomization | 0.1  | 337 |
| CD355  | 56253 | Dichotomization | 0.15 | 339 |
| CD357  | 8784  | Dichotomization | 0.15 | 341 |
| CDW293 | 658   | Dichotomization | 0.2  | 342 |



**Supplement 3. Figures 1 – 351. Distributions Clusters of Differentiation and labels of aberrant gene expression.**

Figure 1 - CD1A

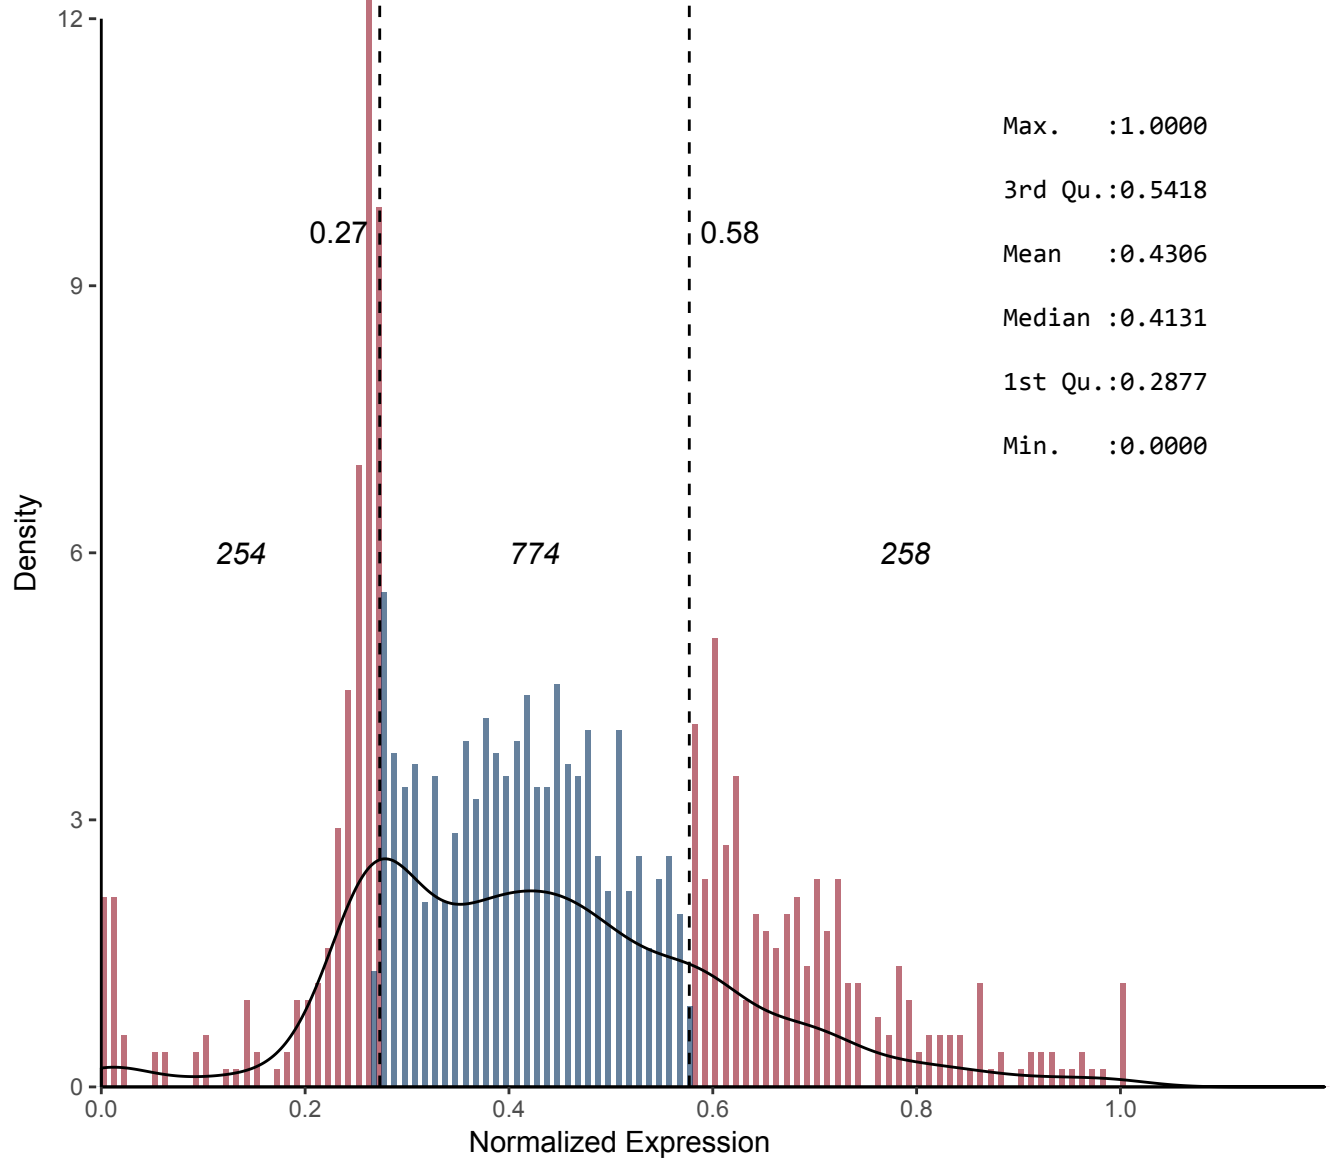

Aberrant TRUE FALSE

Figure 2 - CD1B

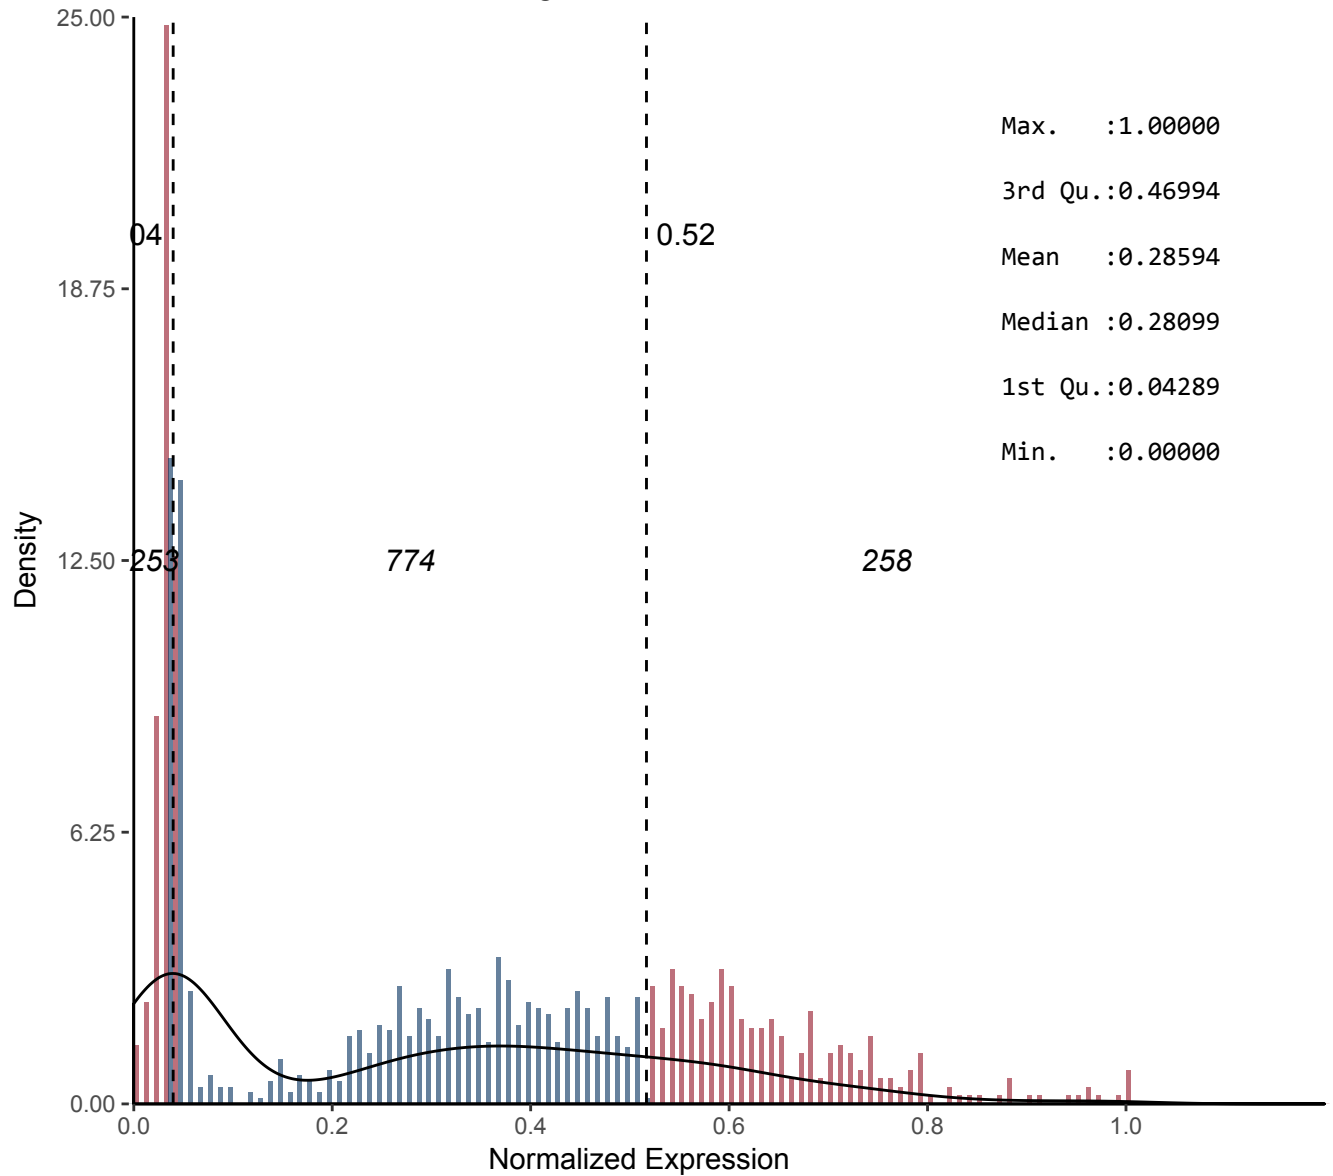

Aberrant ■ TRUE ■ FALSE

Figure 3 - CD1C

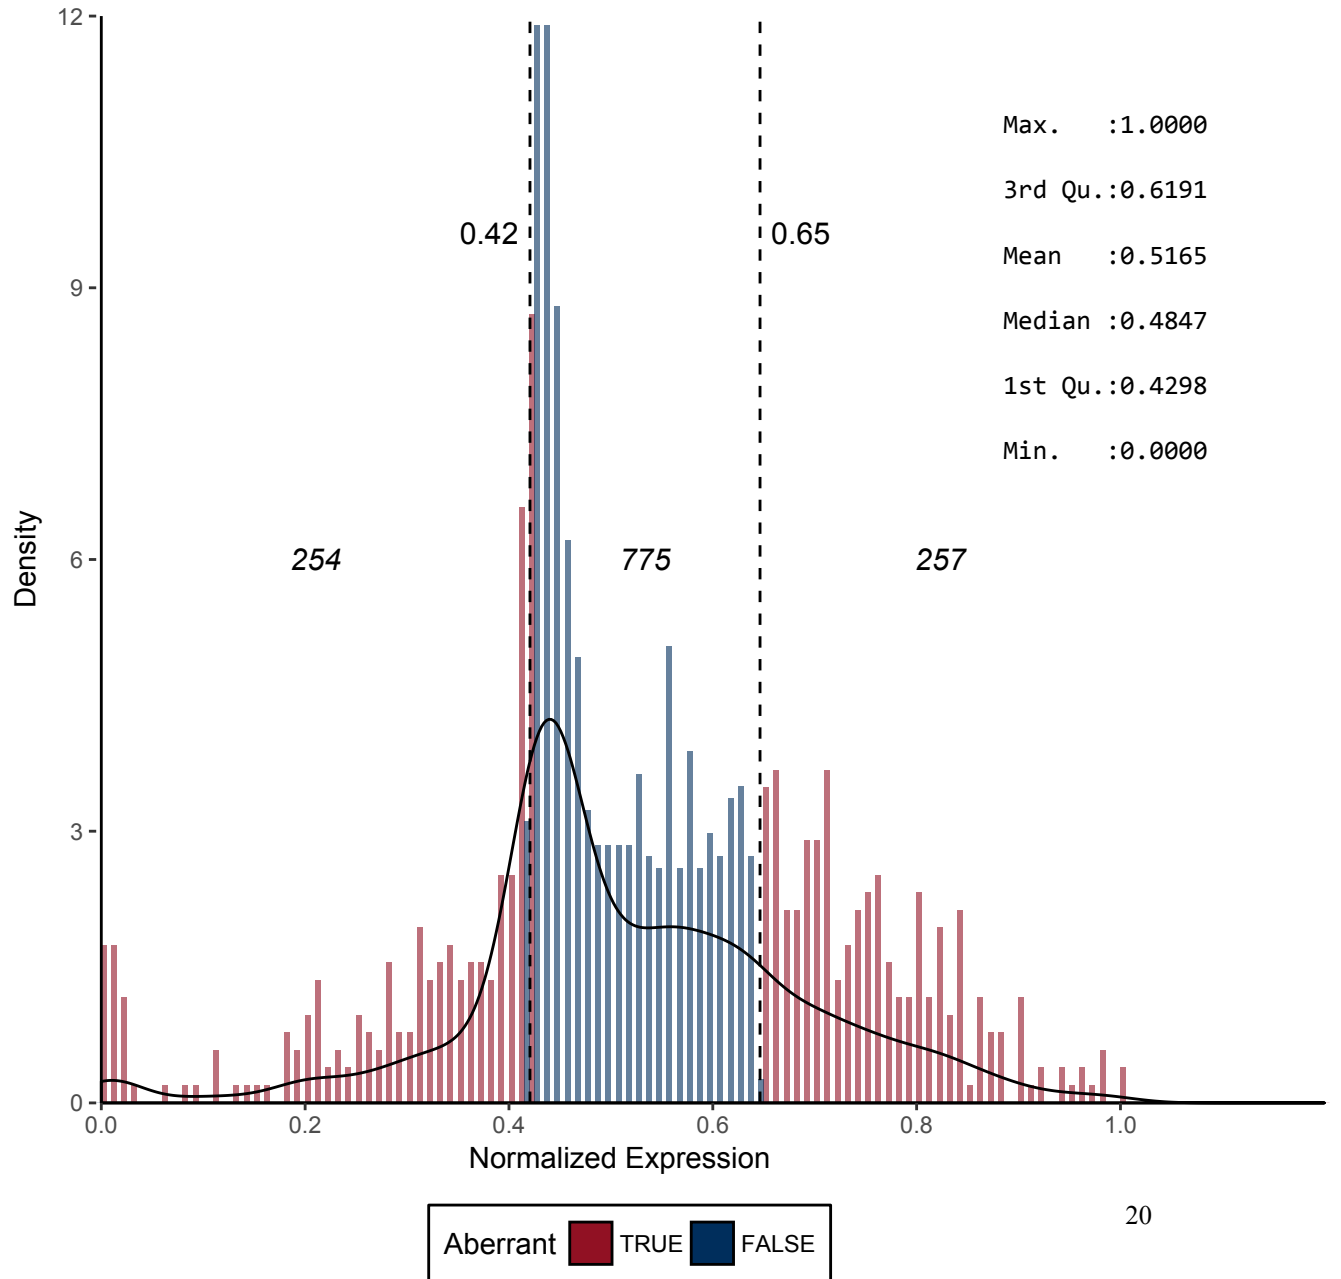

Figure 4 - CD1D

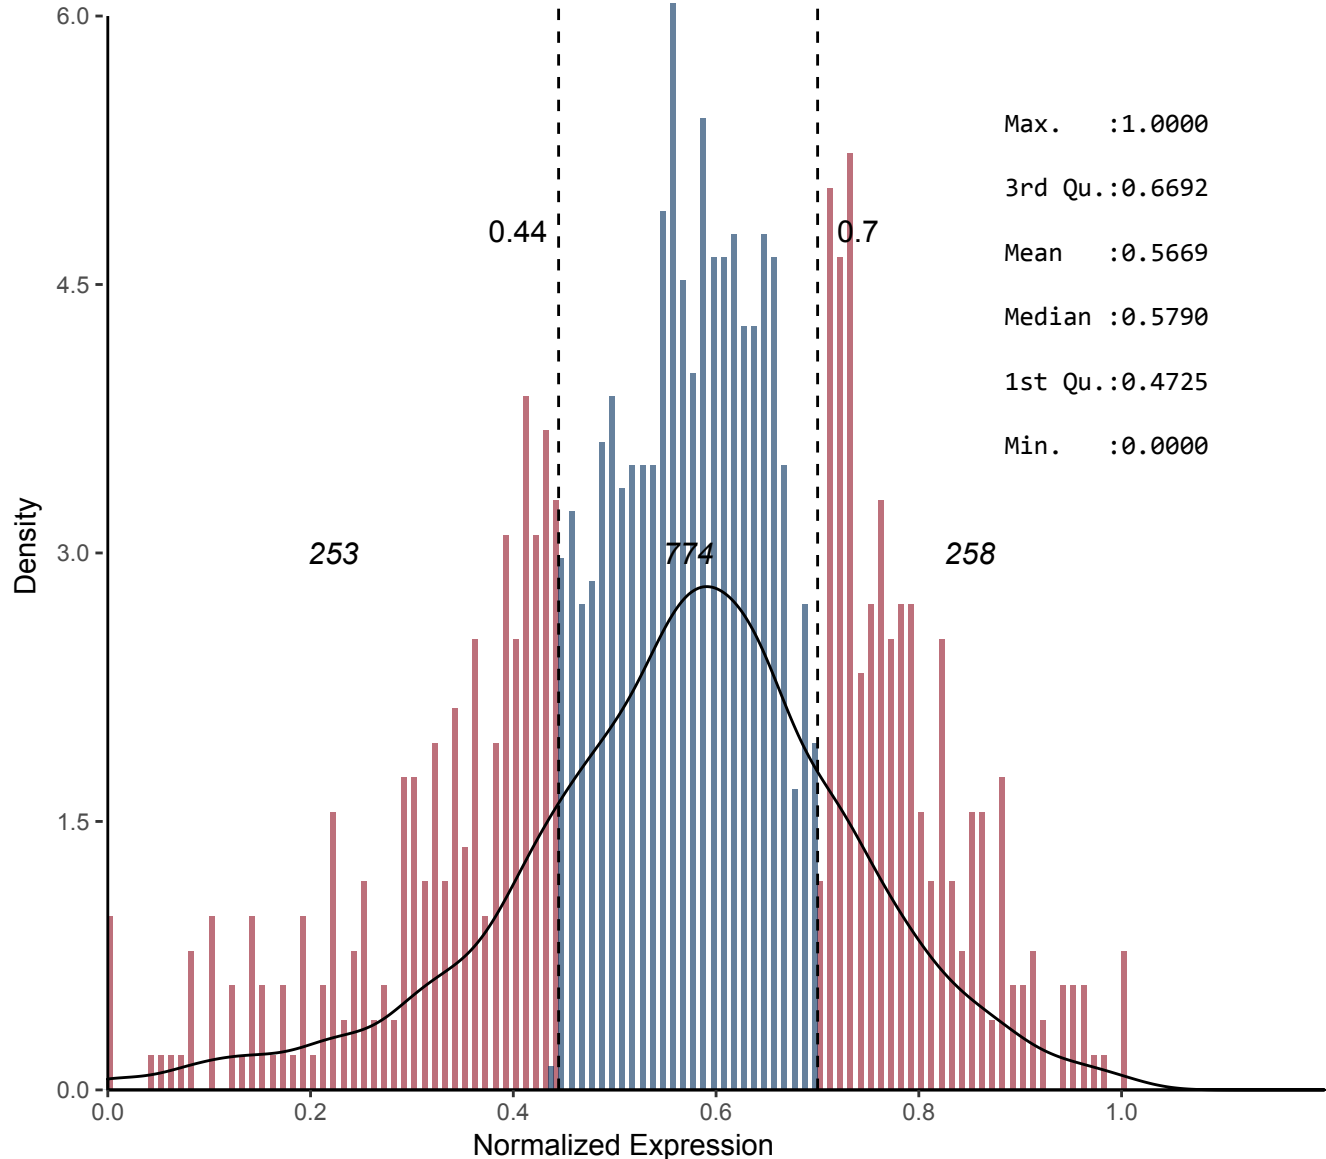

Aberrant TRUE FALSE

Figure 5 - CD1E

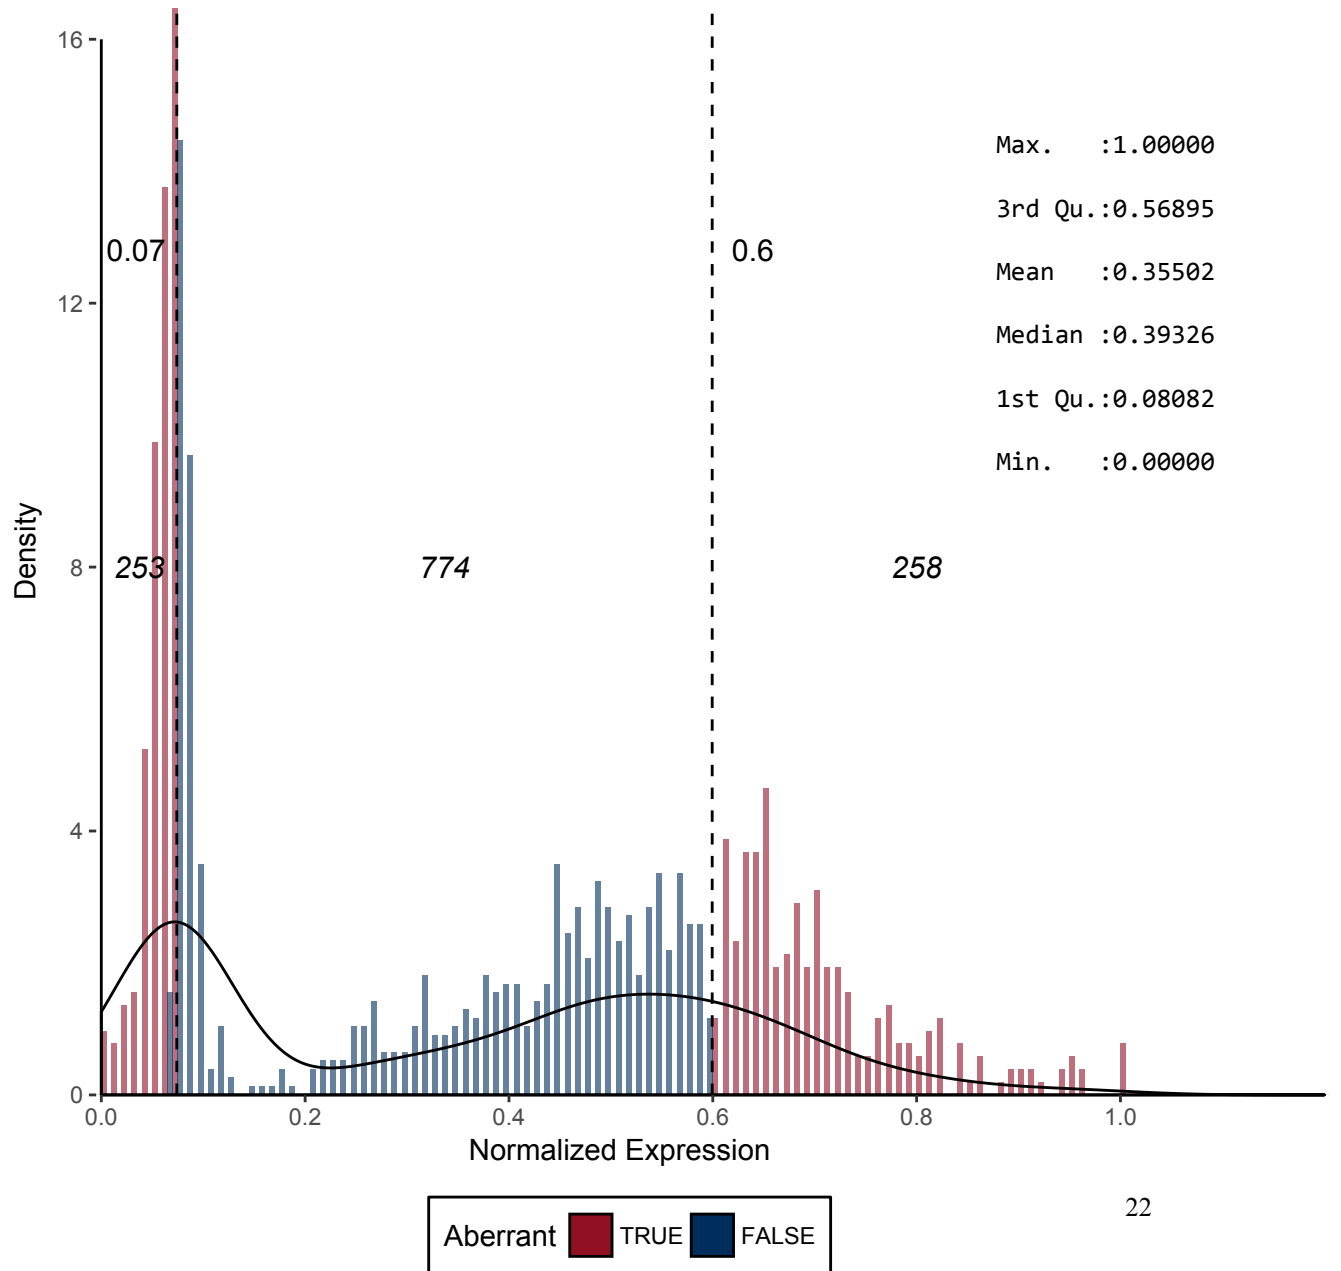

Figure 6 - CD2

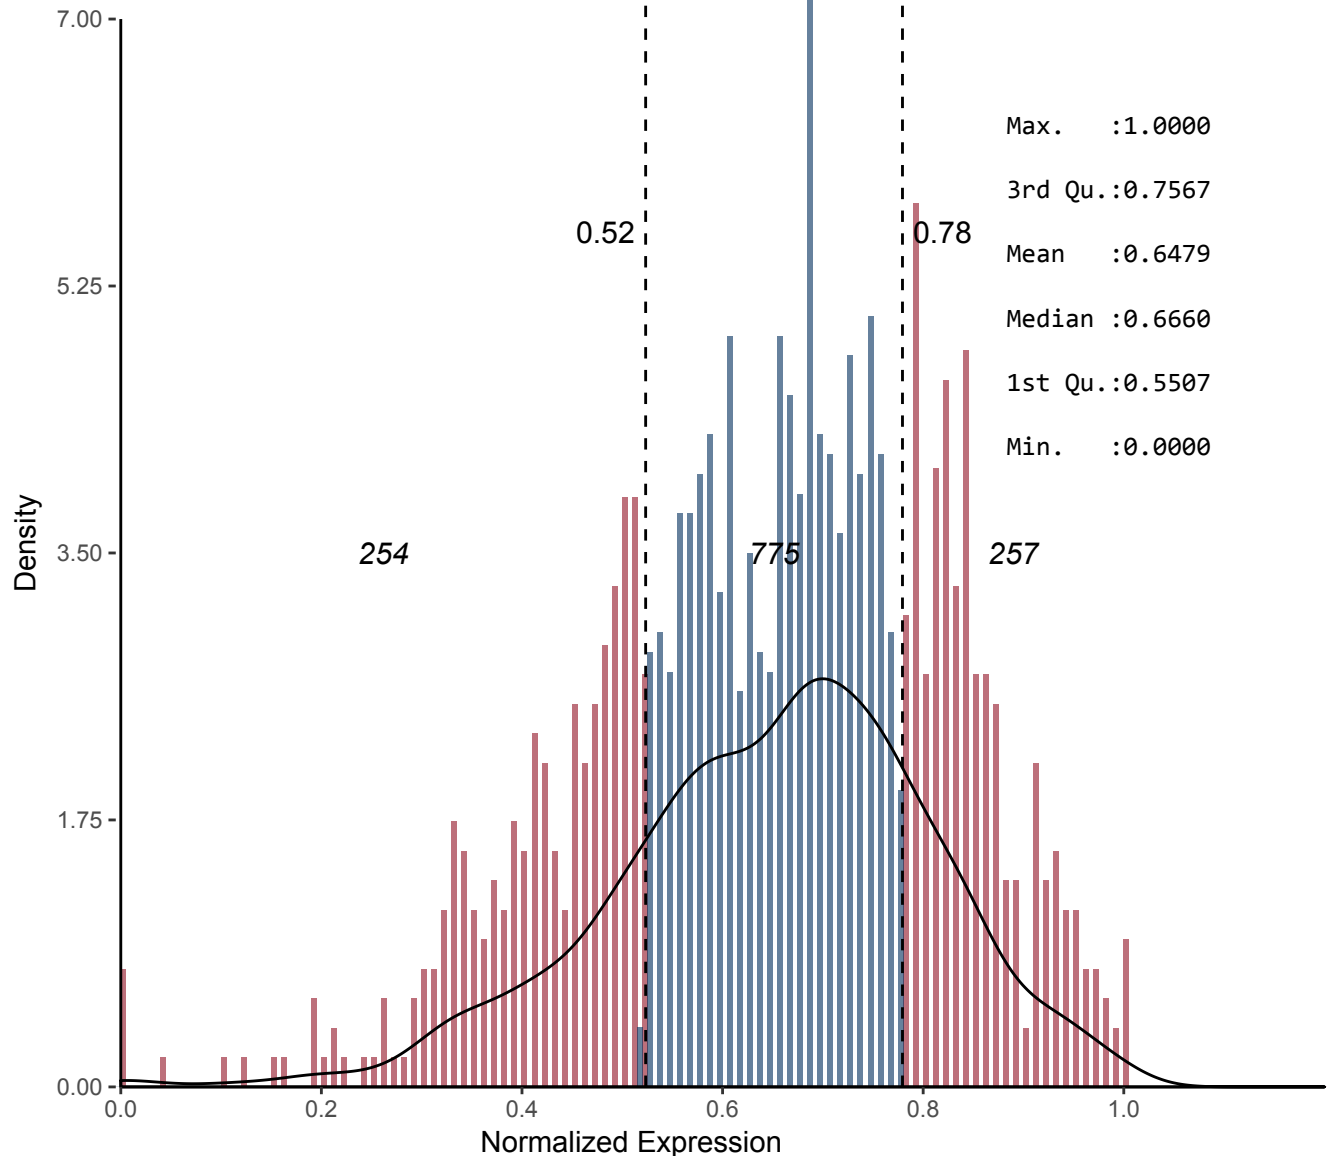

Aberrant TRUE FALSE

Figure 7 - CD3D

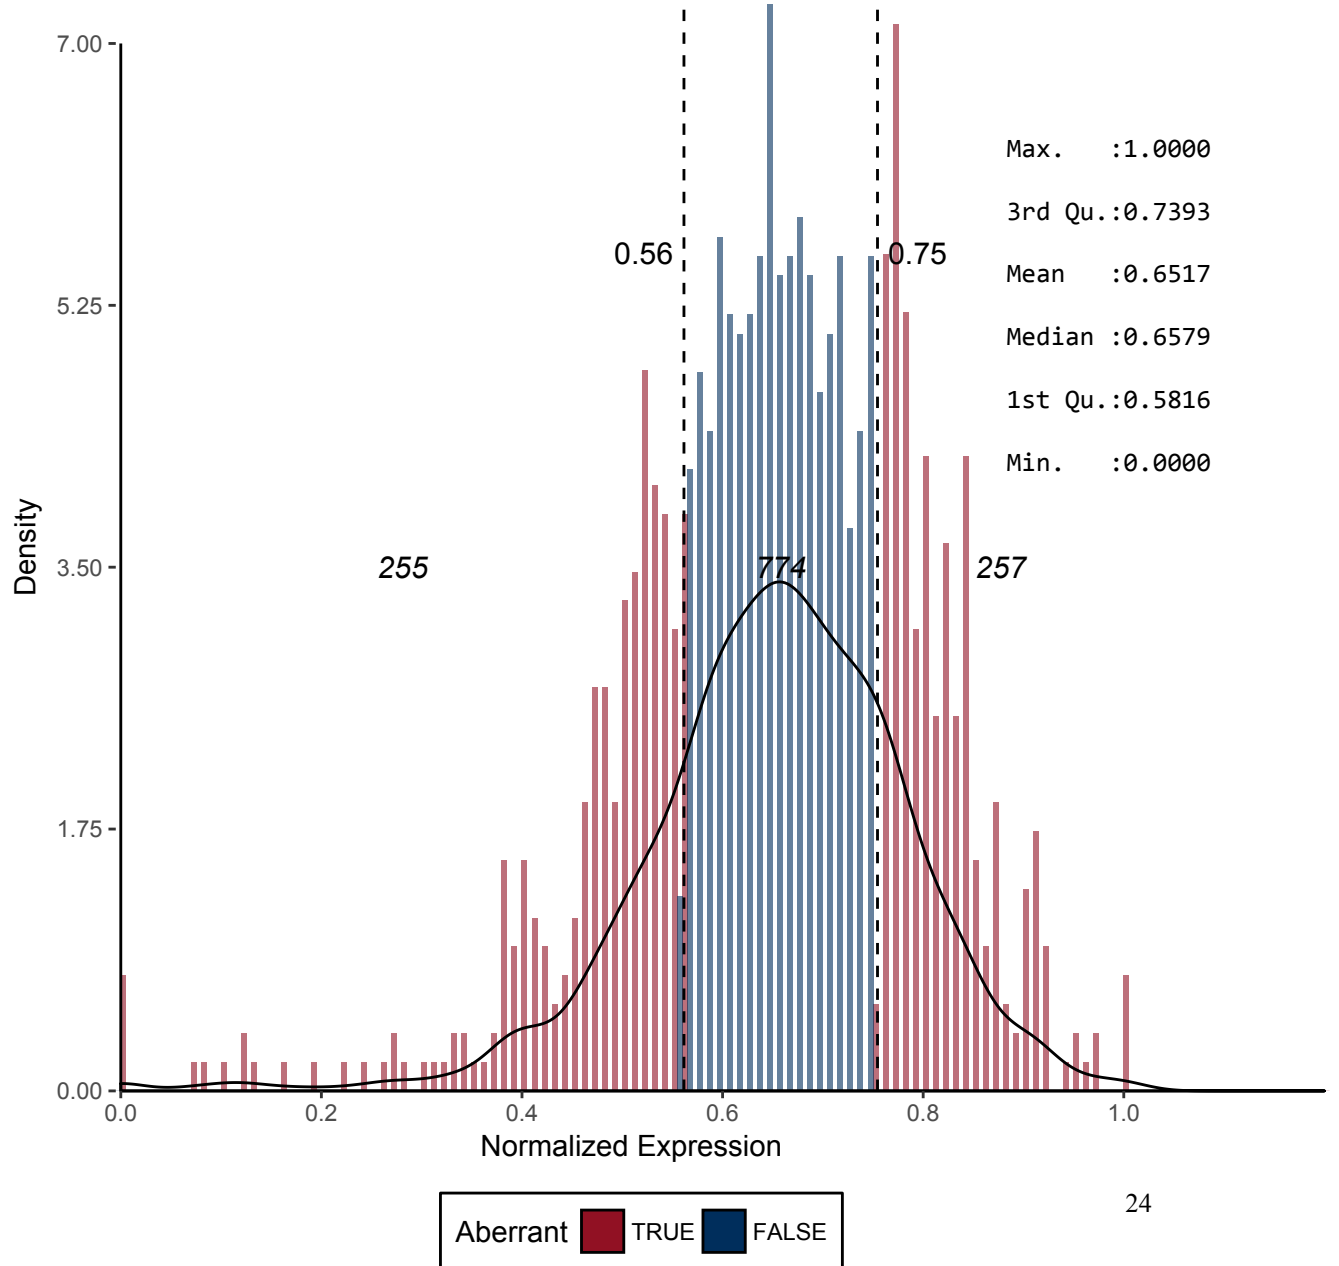



Figure 8 - CD3E

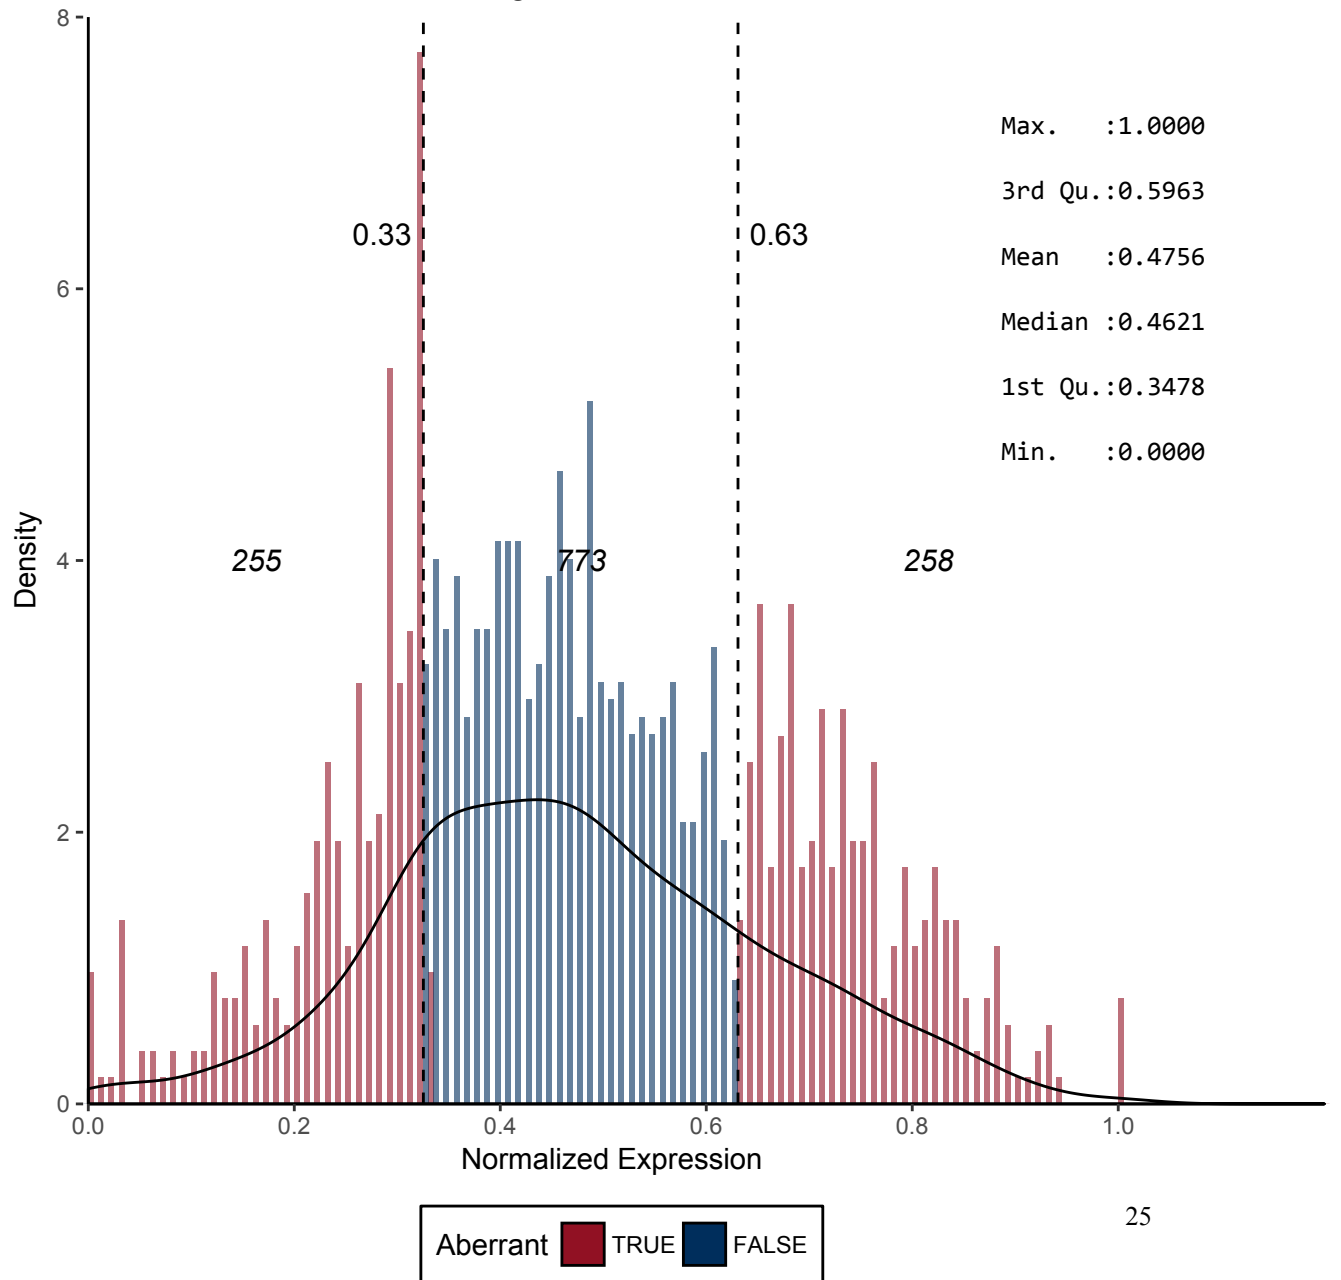

Figure 9 - CD3G

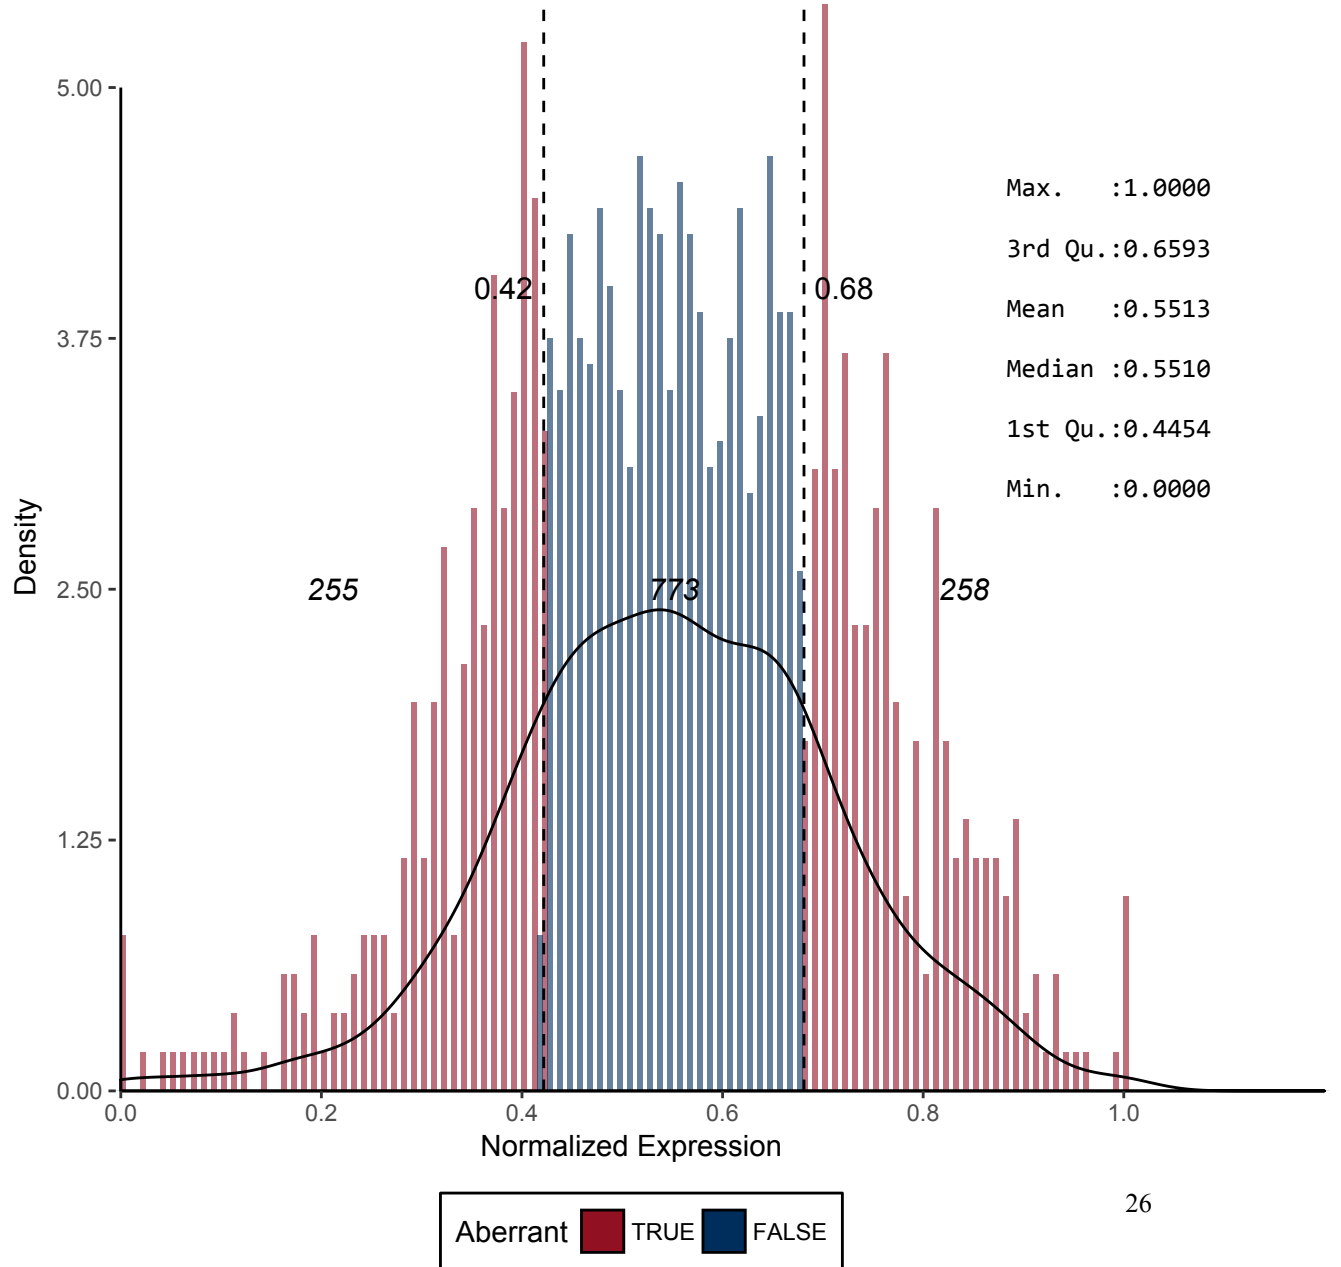

Figure 10 - CD4

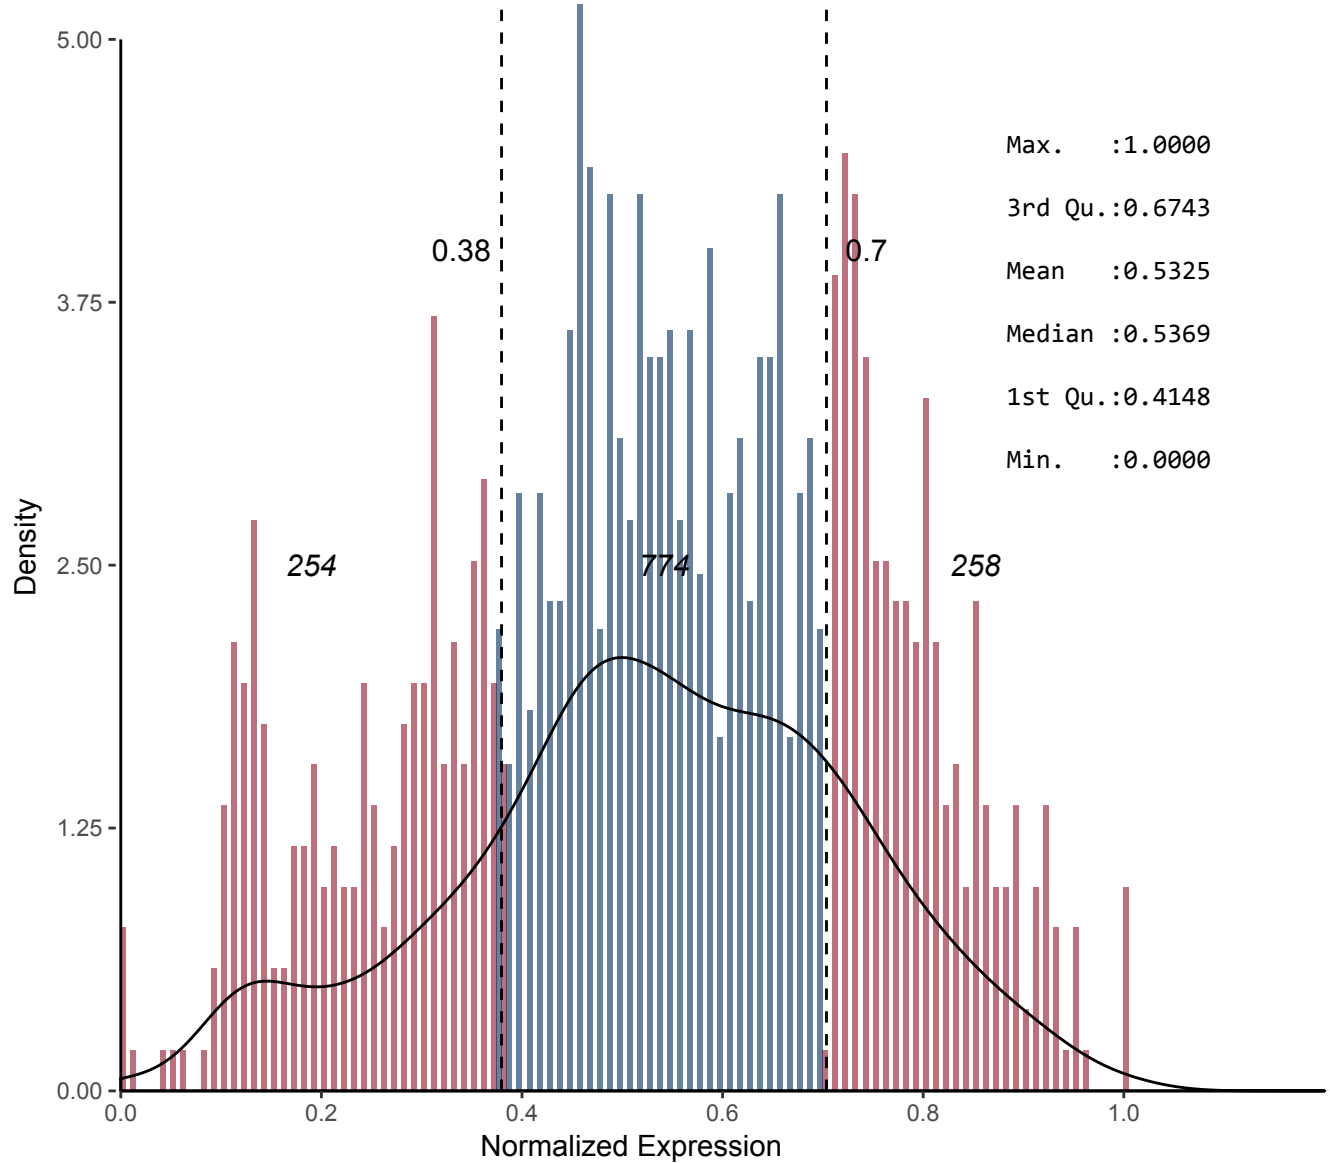

Aberrant TRUE FALSE

Figure 11 - CD5

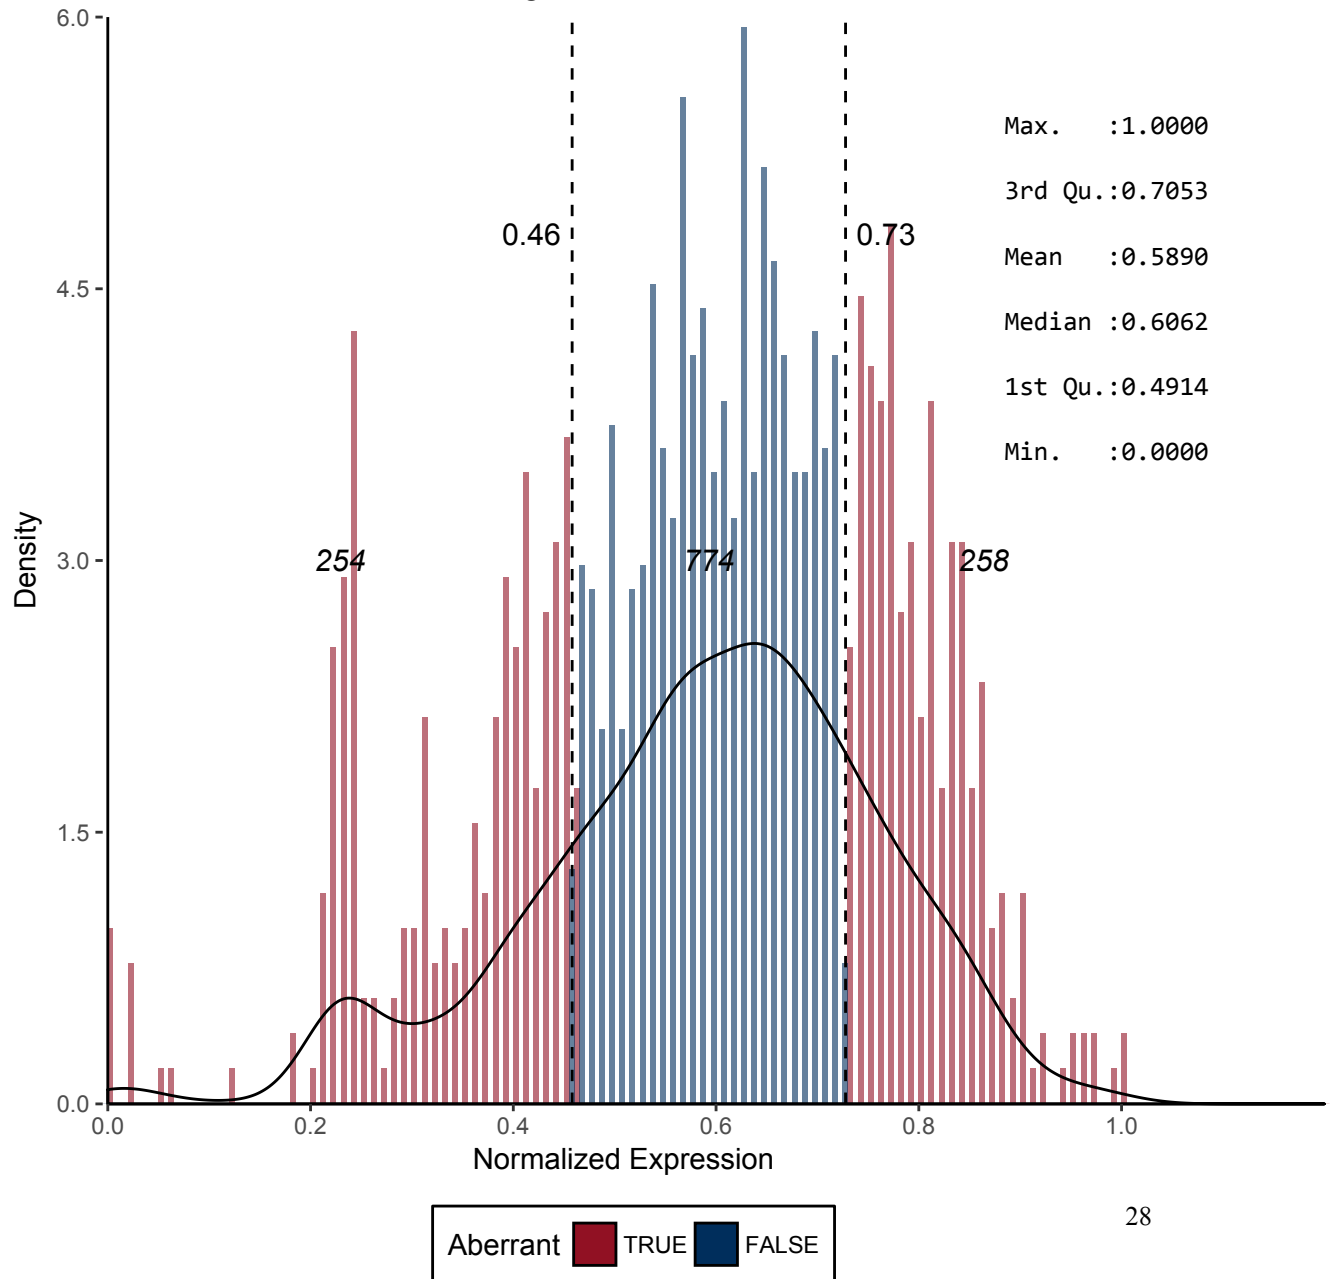

Figure 12 - CD6

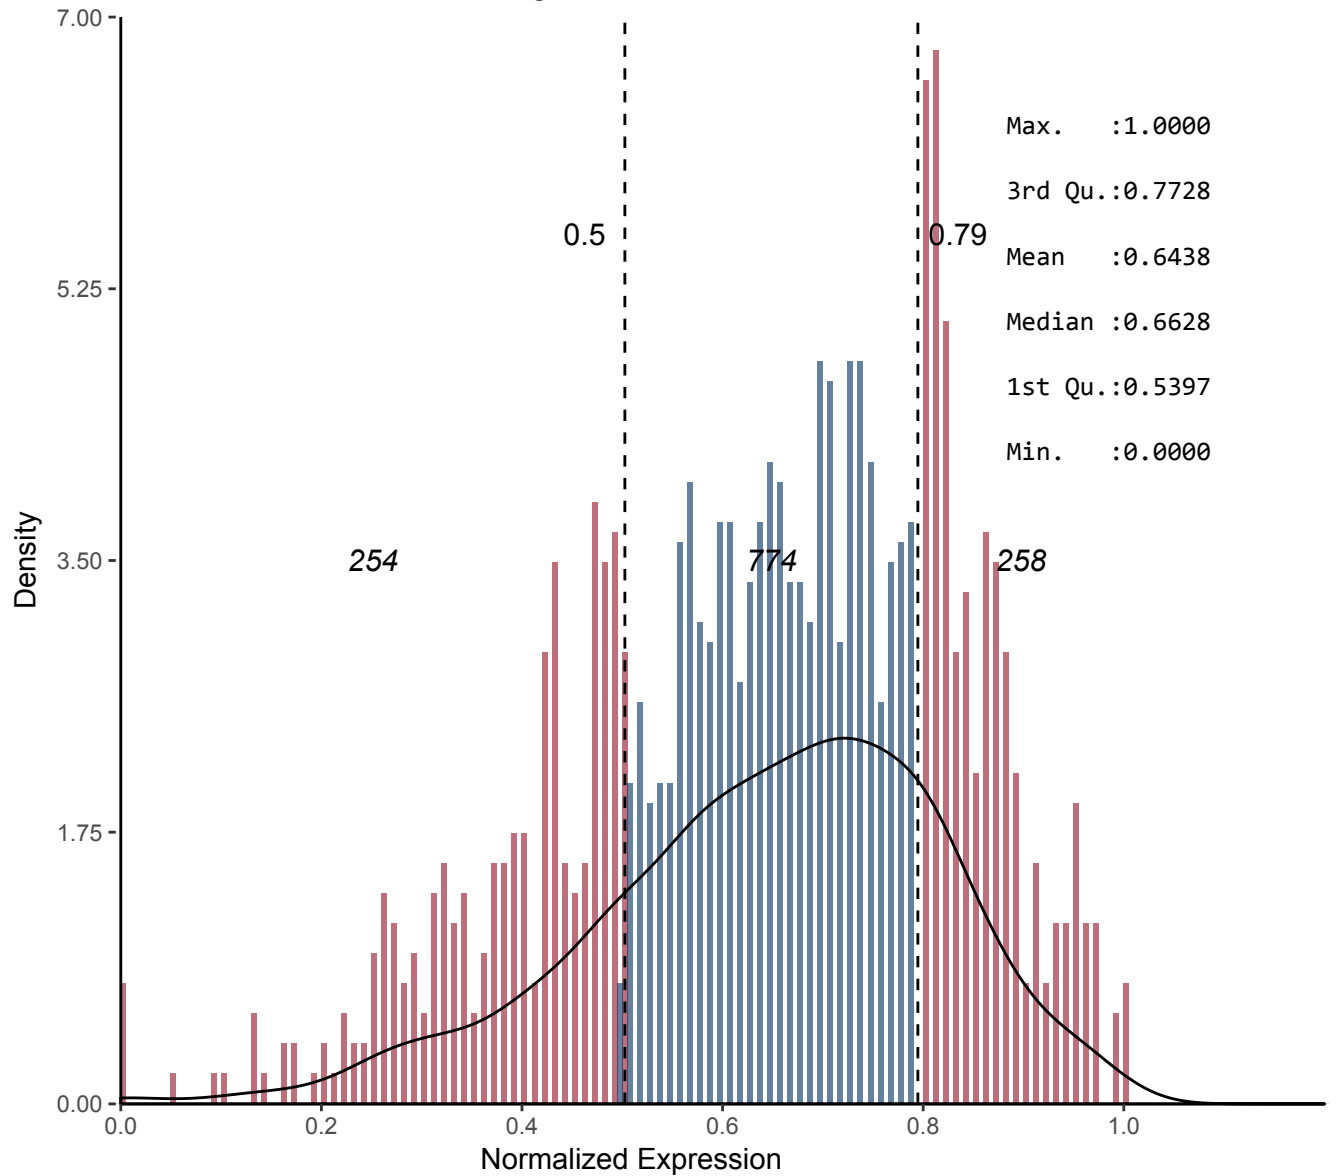

Aberrant TRUE FALSE

Figure 13 - CD7

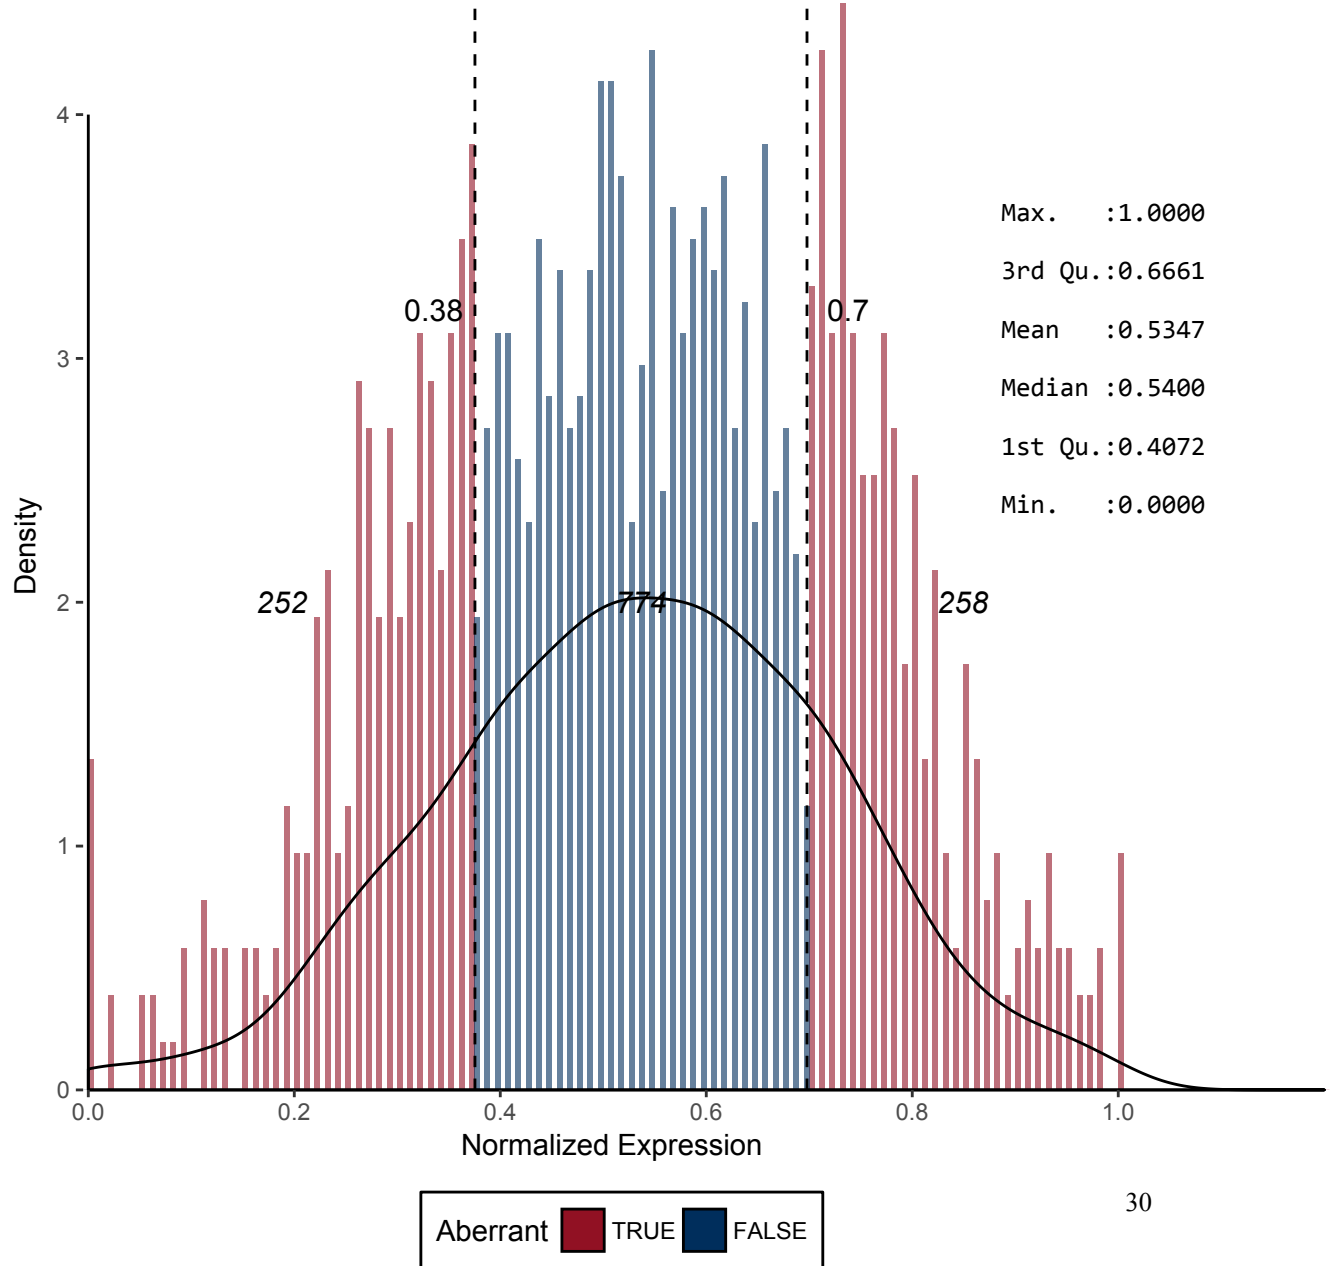

Figure 14 - CD8A

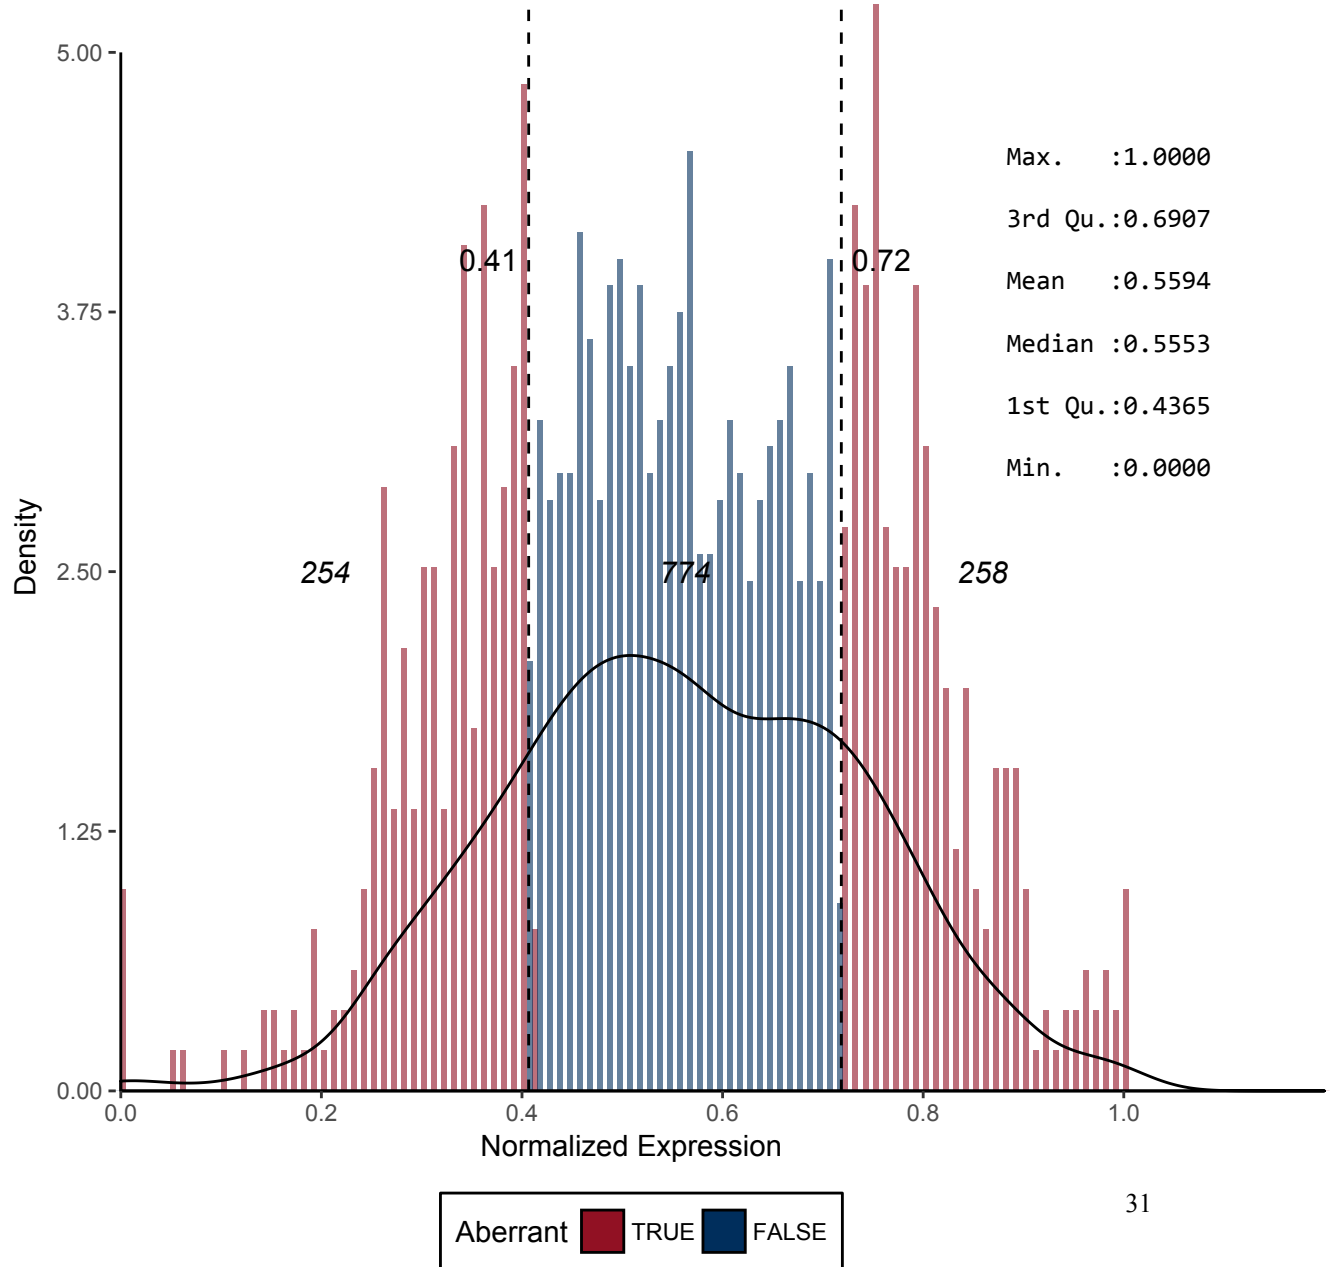

Figure 15 - CD8B

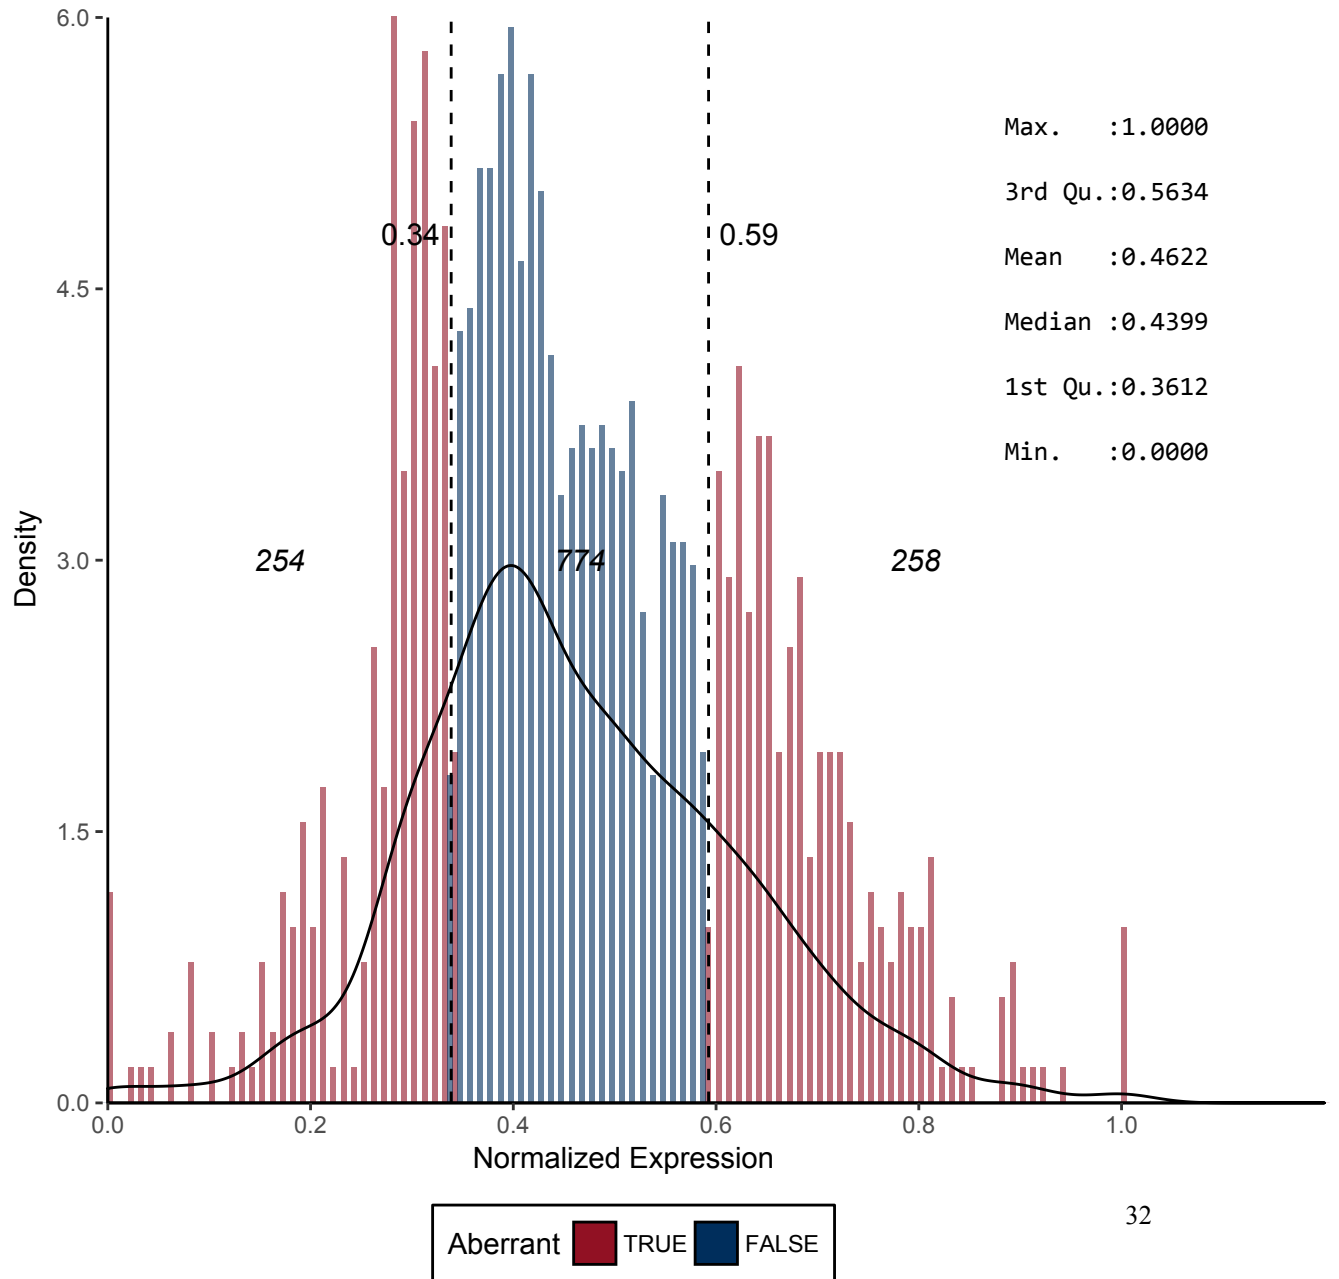



Figure 16 - CD9

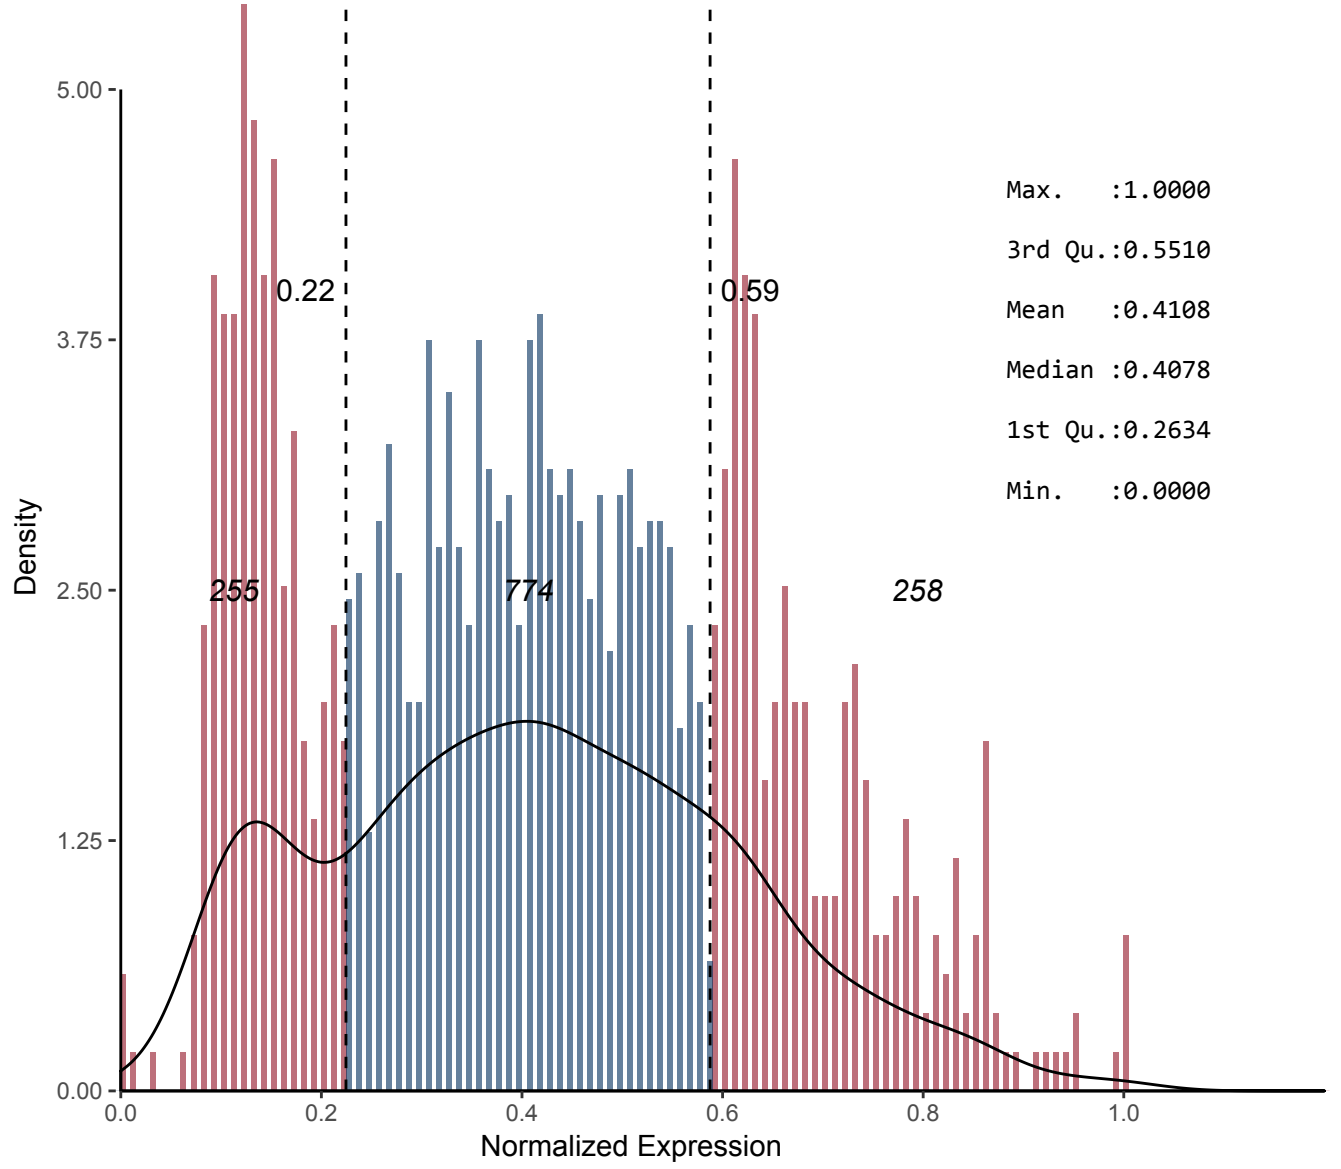

Aberrant TRUE FALSE

Figure 17 - CD10

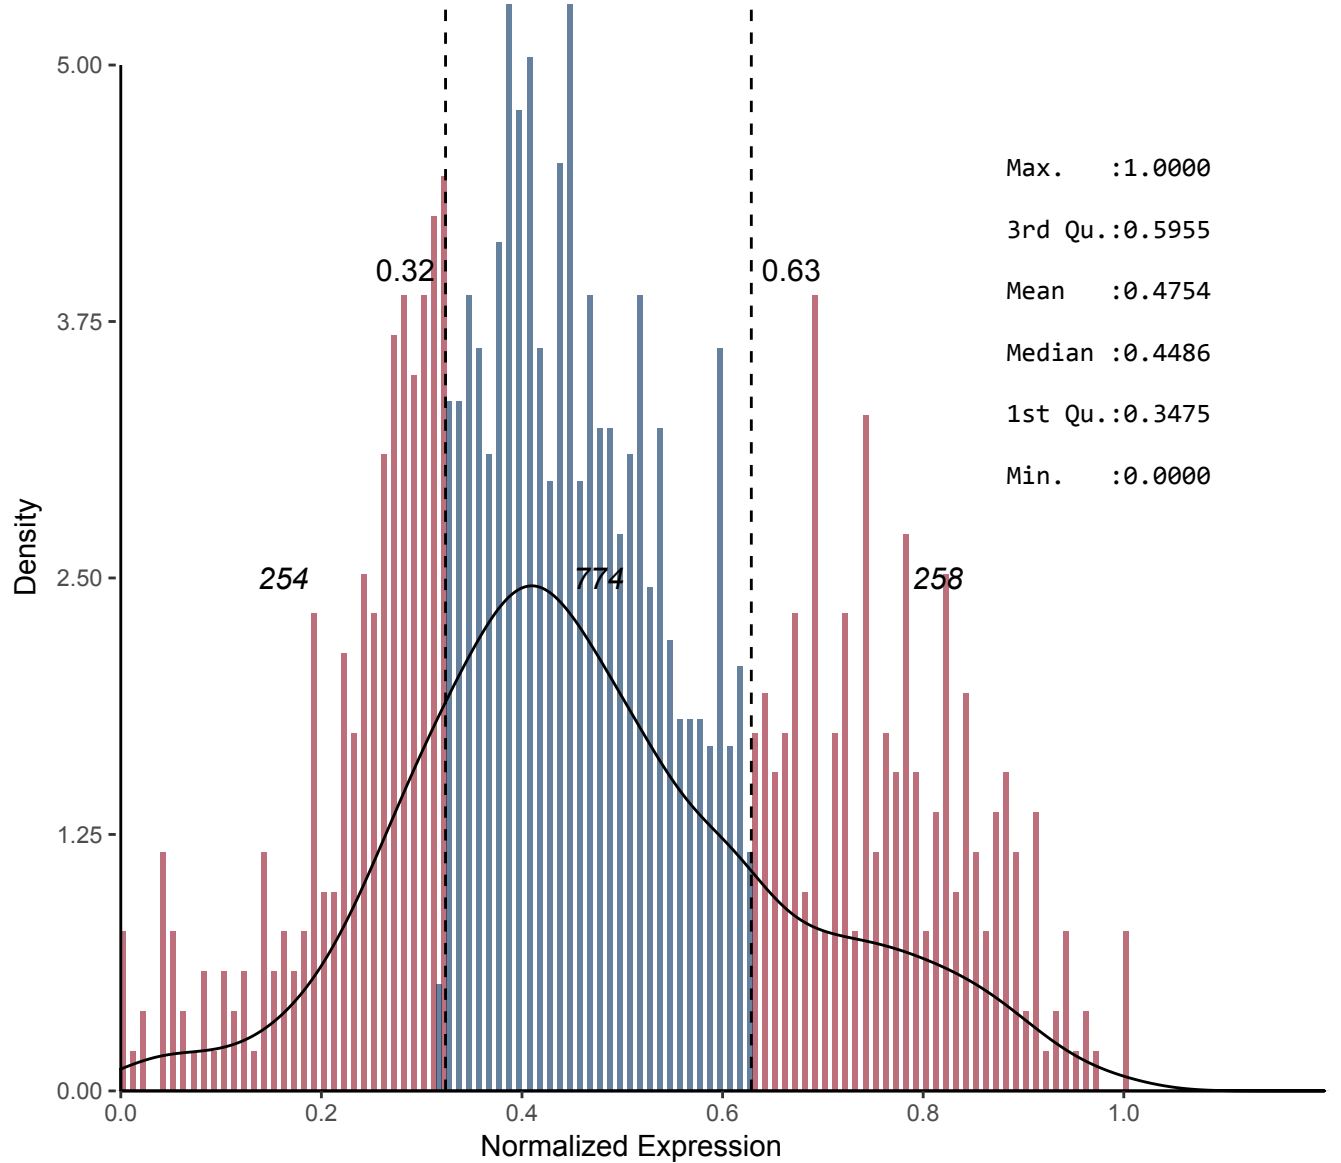

Aberrant TRUE FALSE

Figure 18 - CD11A

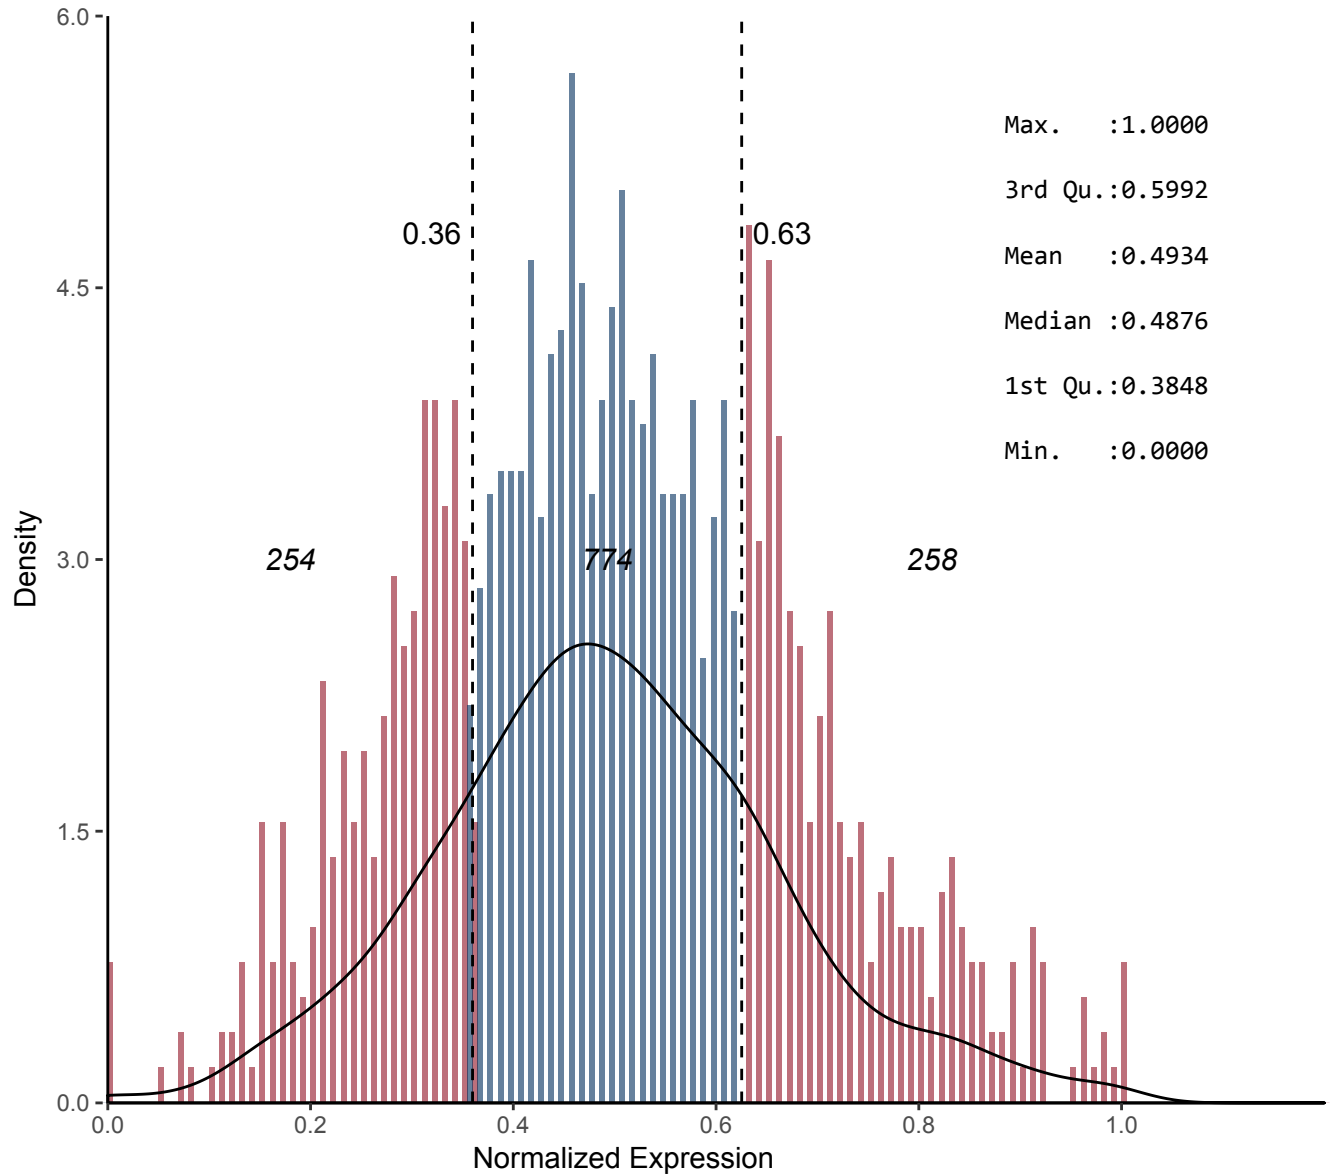

Aberrant TRUE FALSE

Figure 19 - CD11B

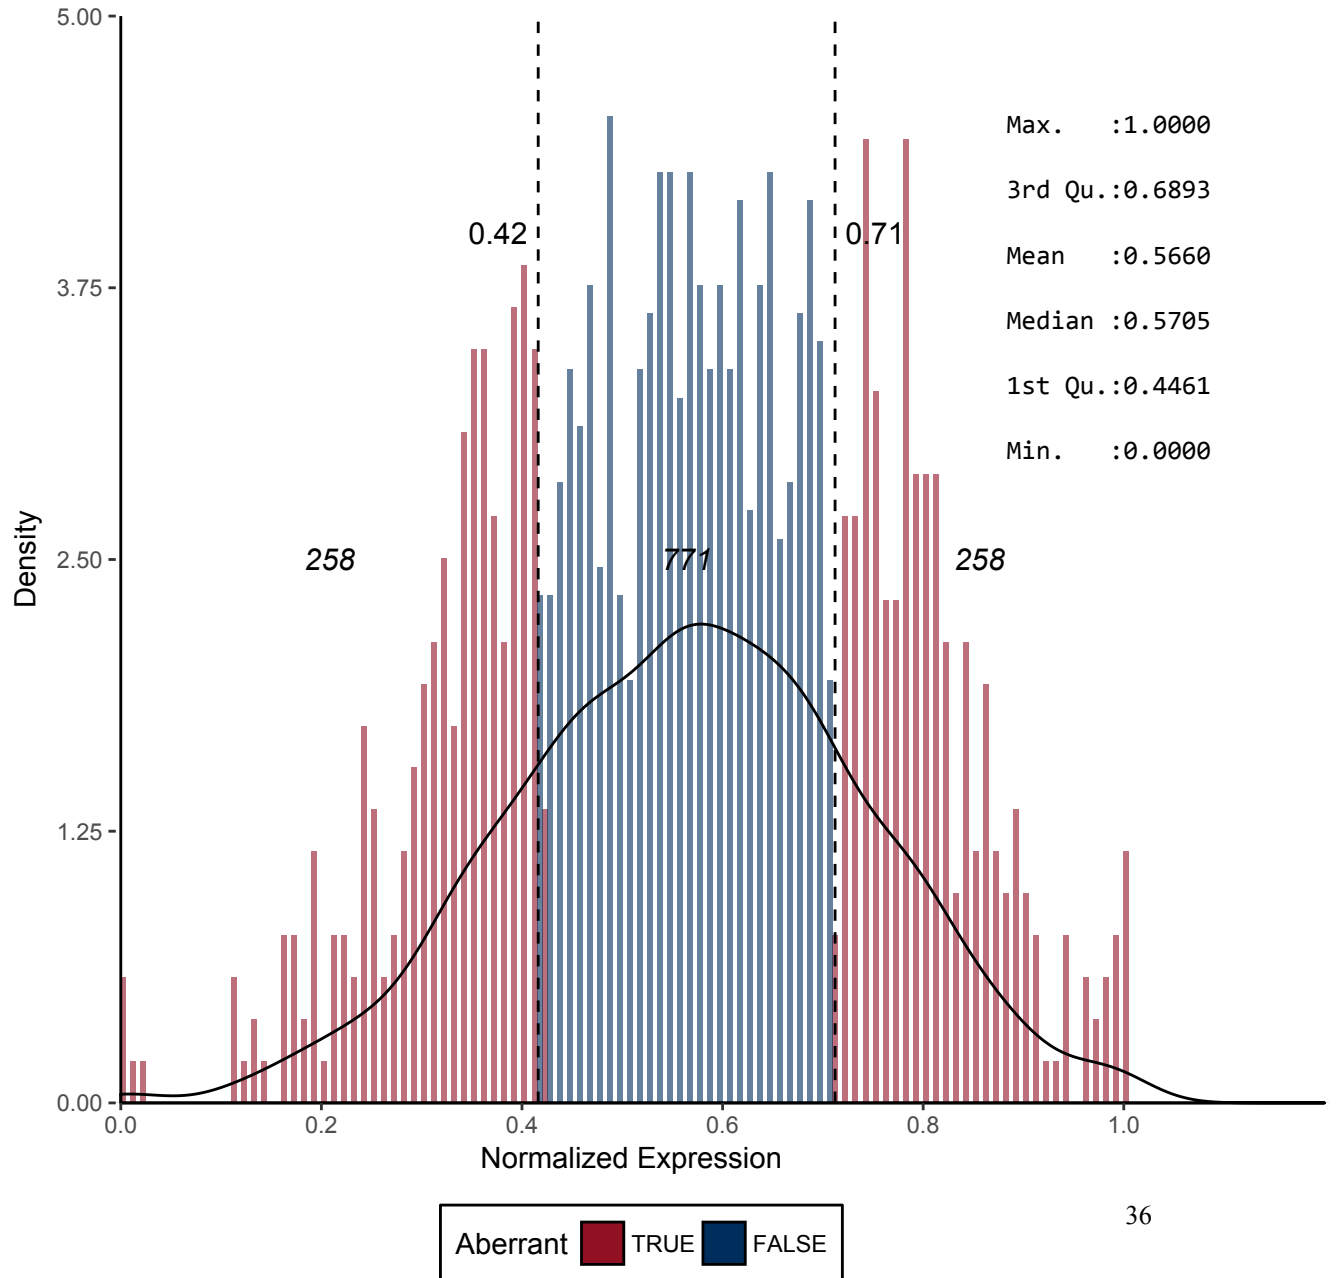

Figure 20 - CD11C

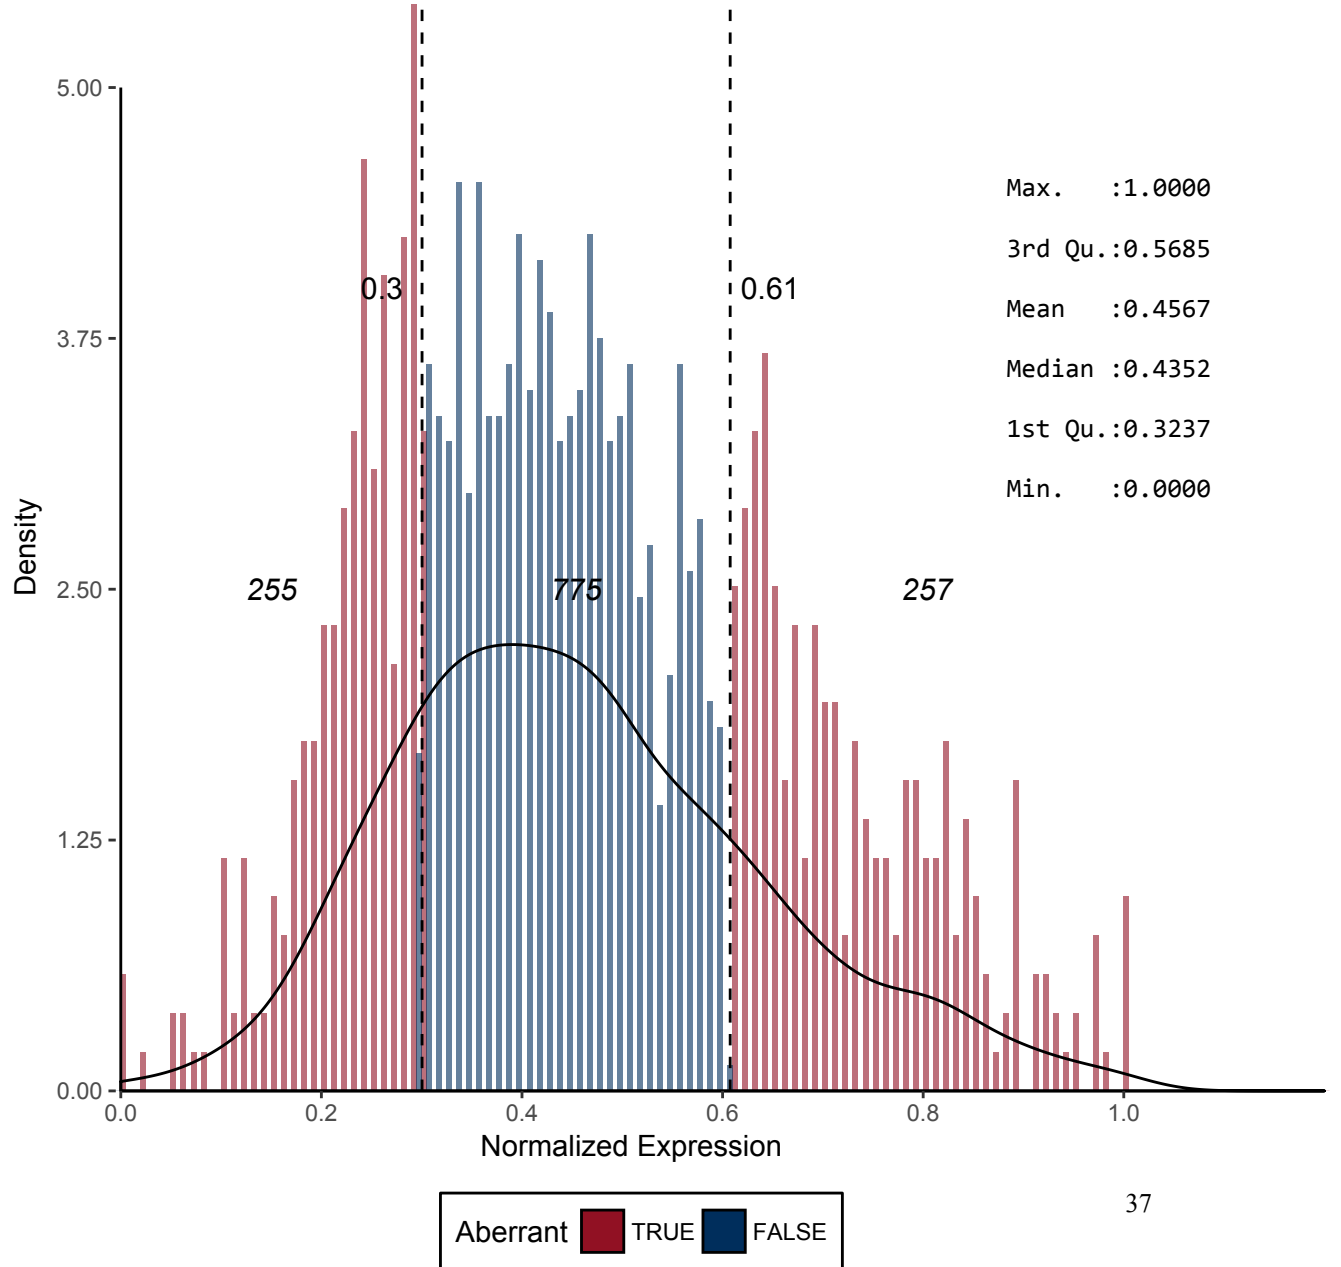

Figure 21 - CD13

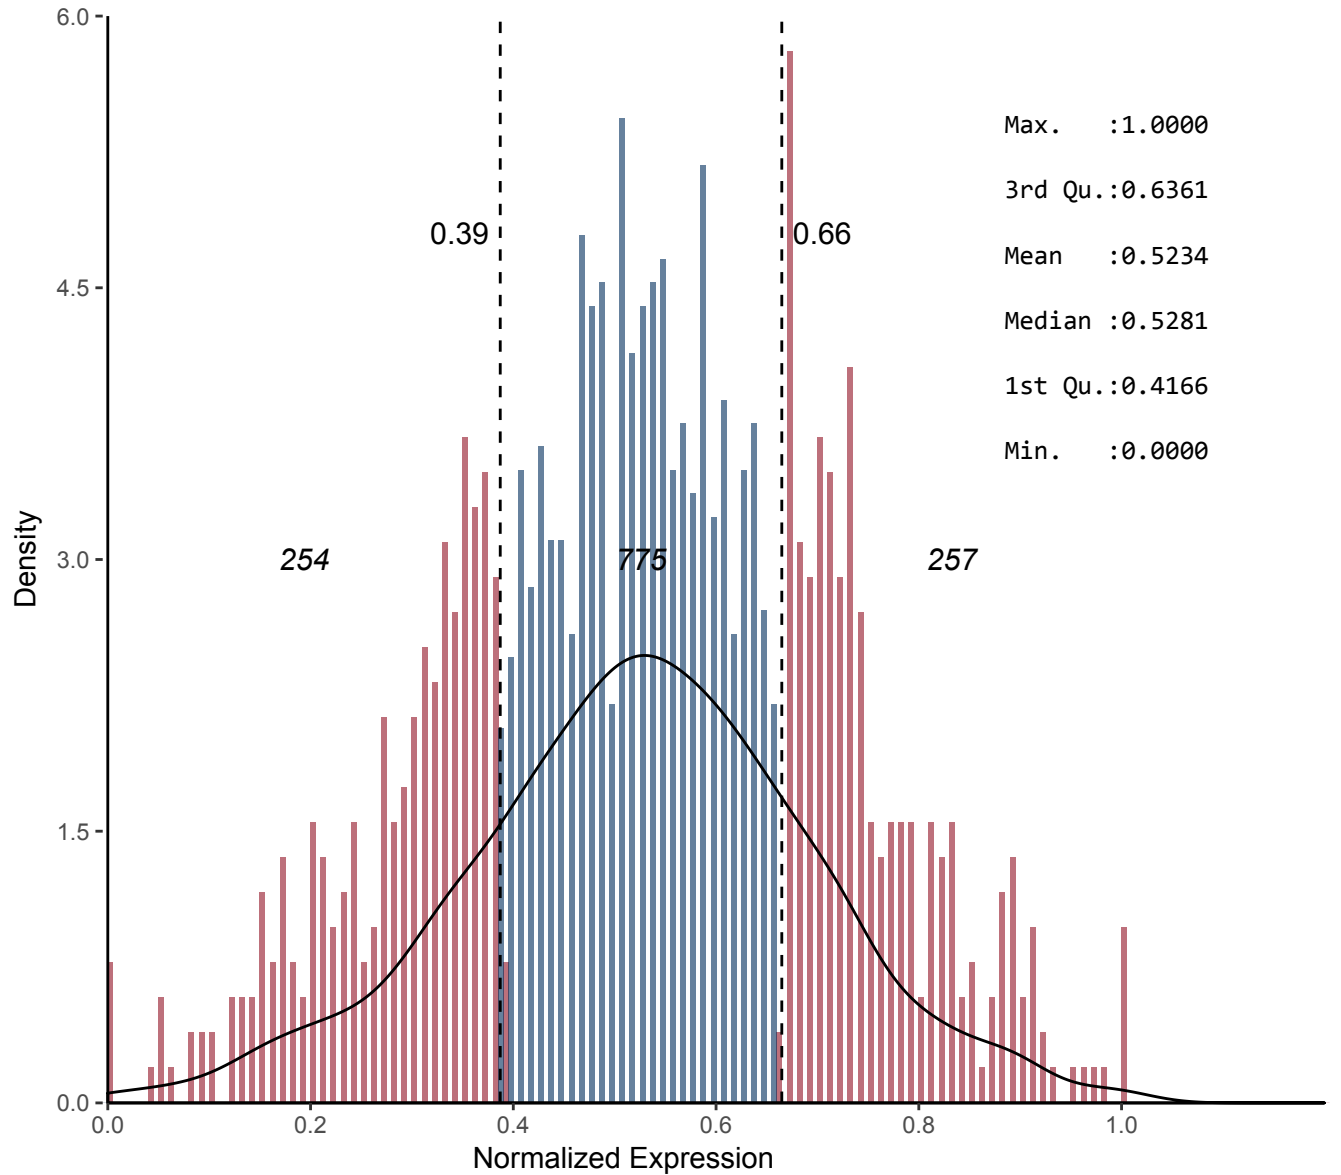

Aberrant TRUE FALSE

Figure 22 - CD14

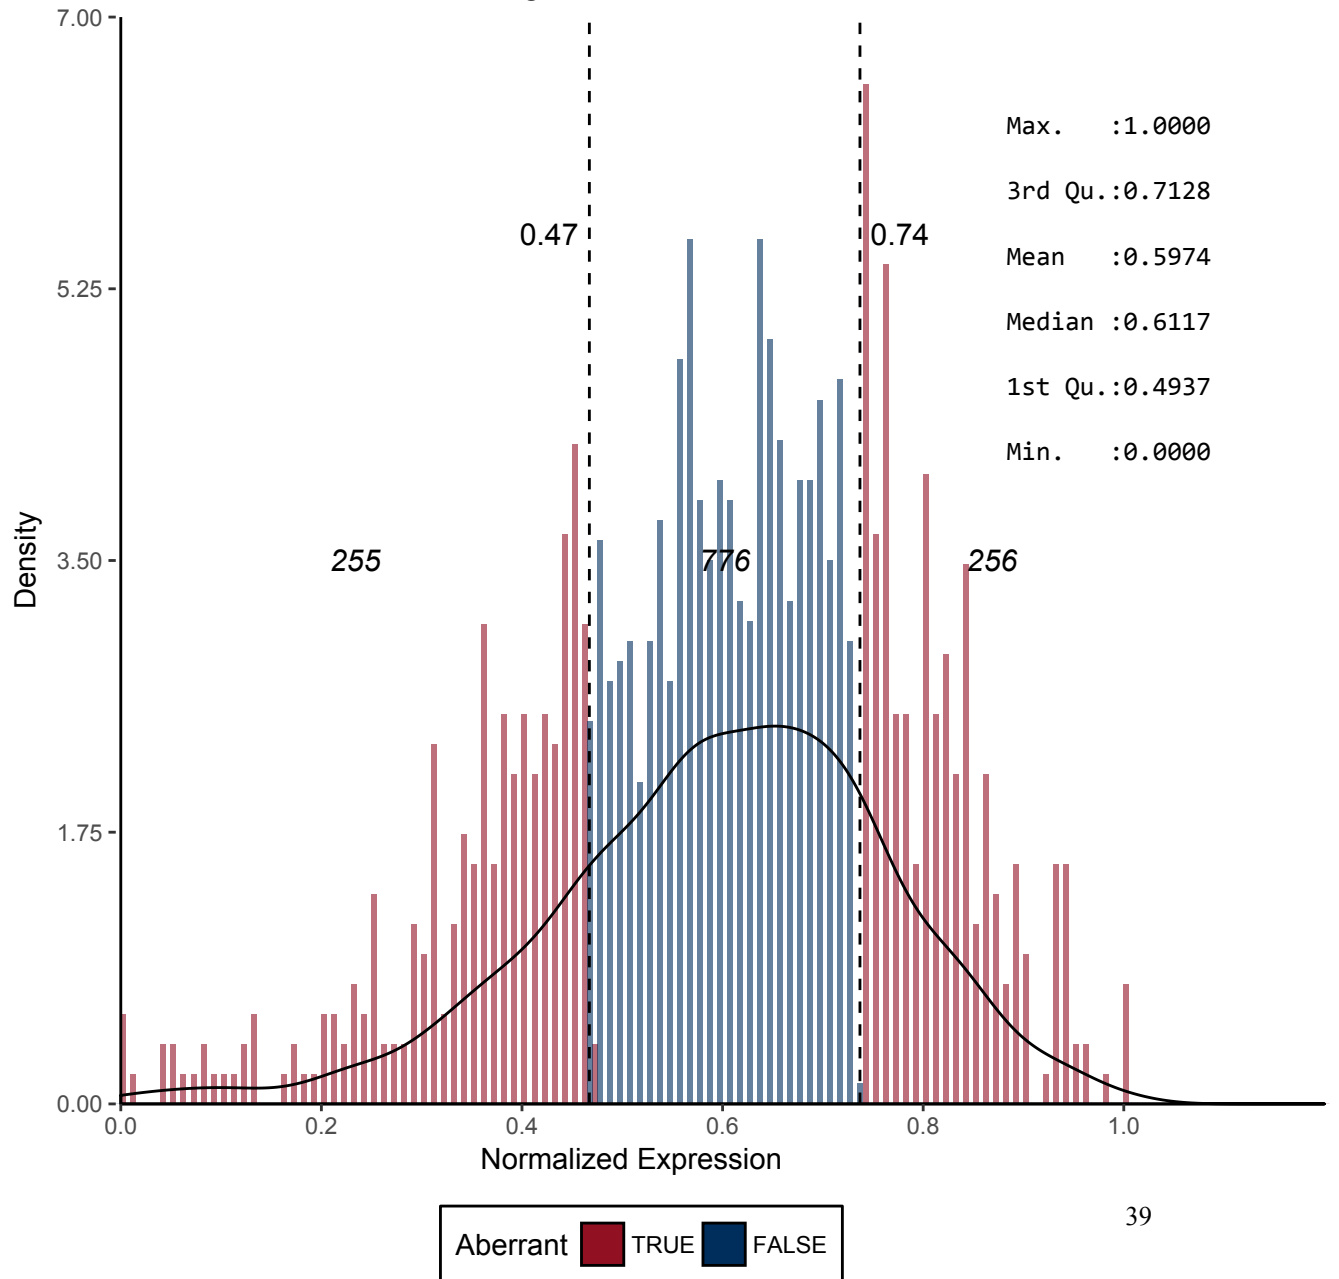

Figure 23 - CD15

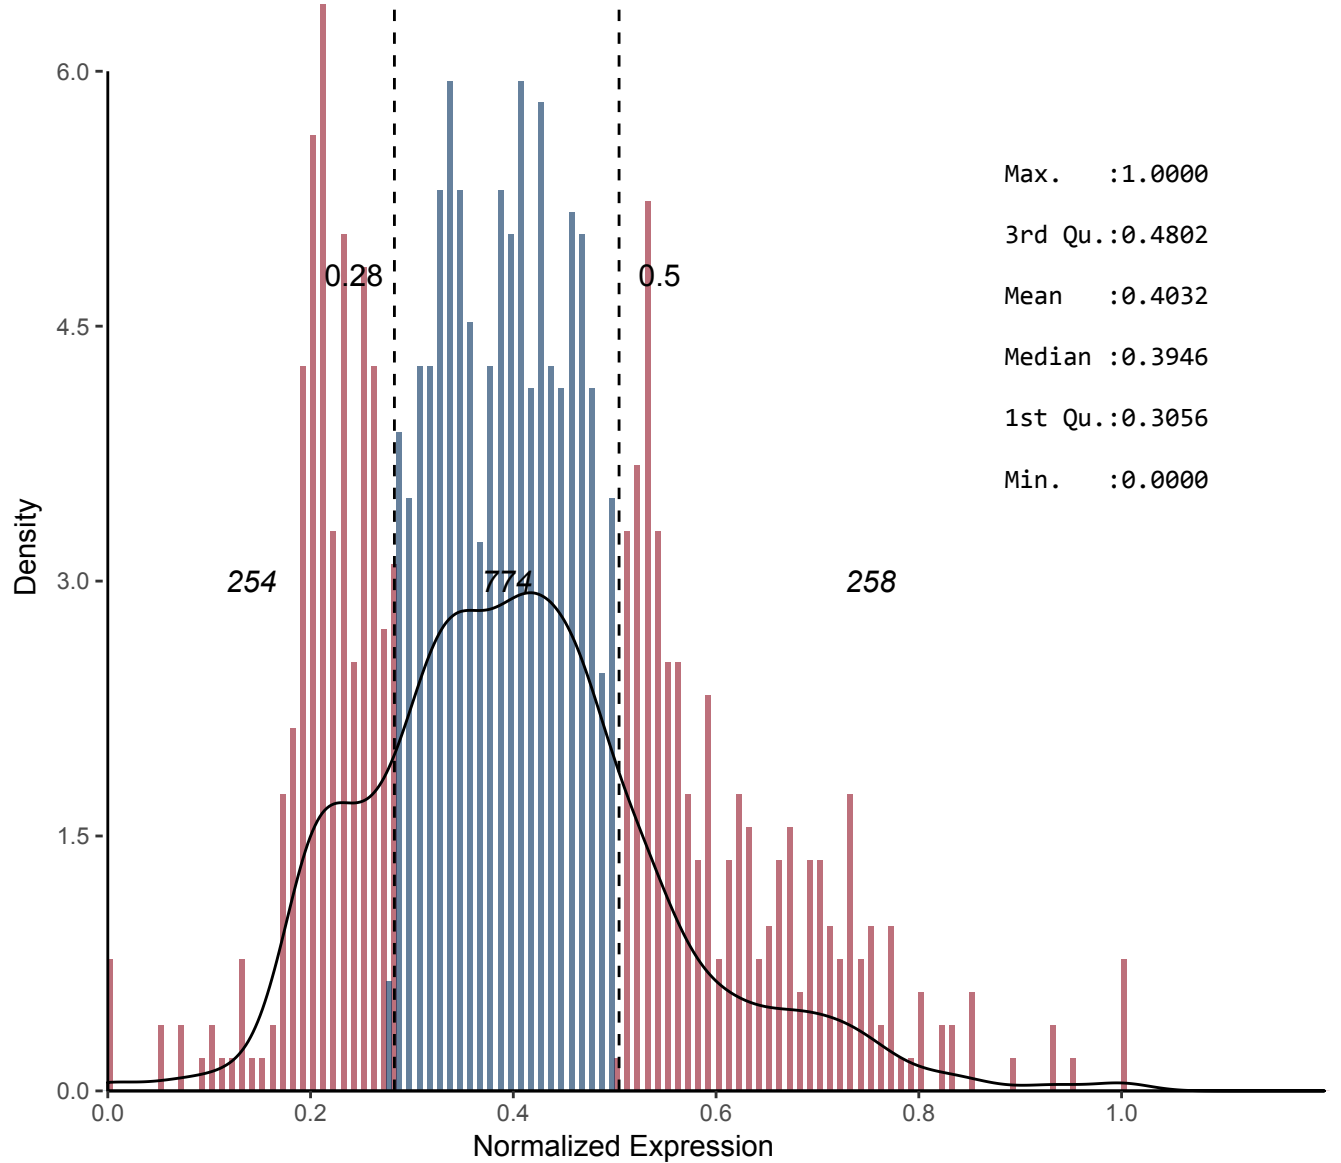

Aberrant TRUE FALSE



Figure 24 - CD16B

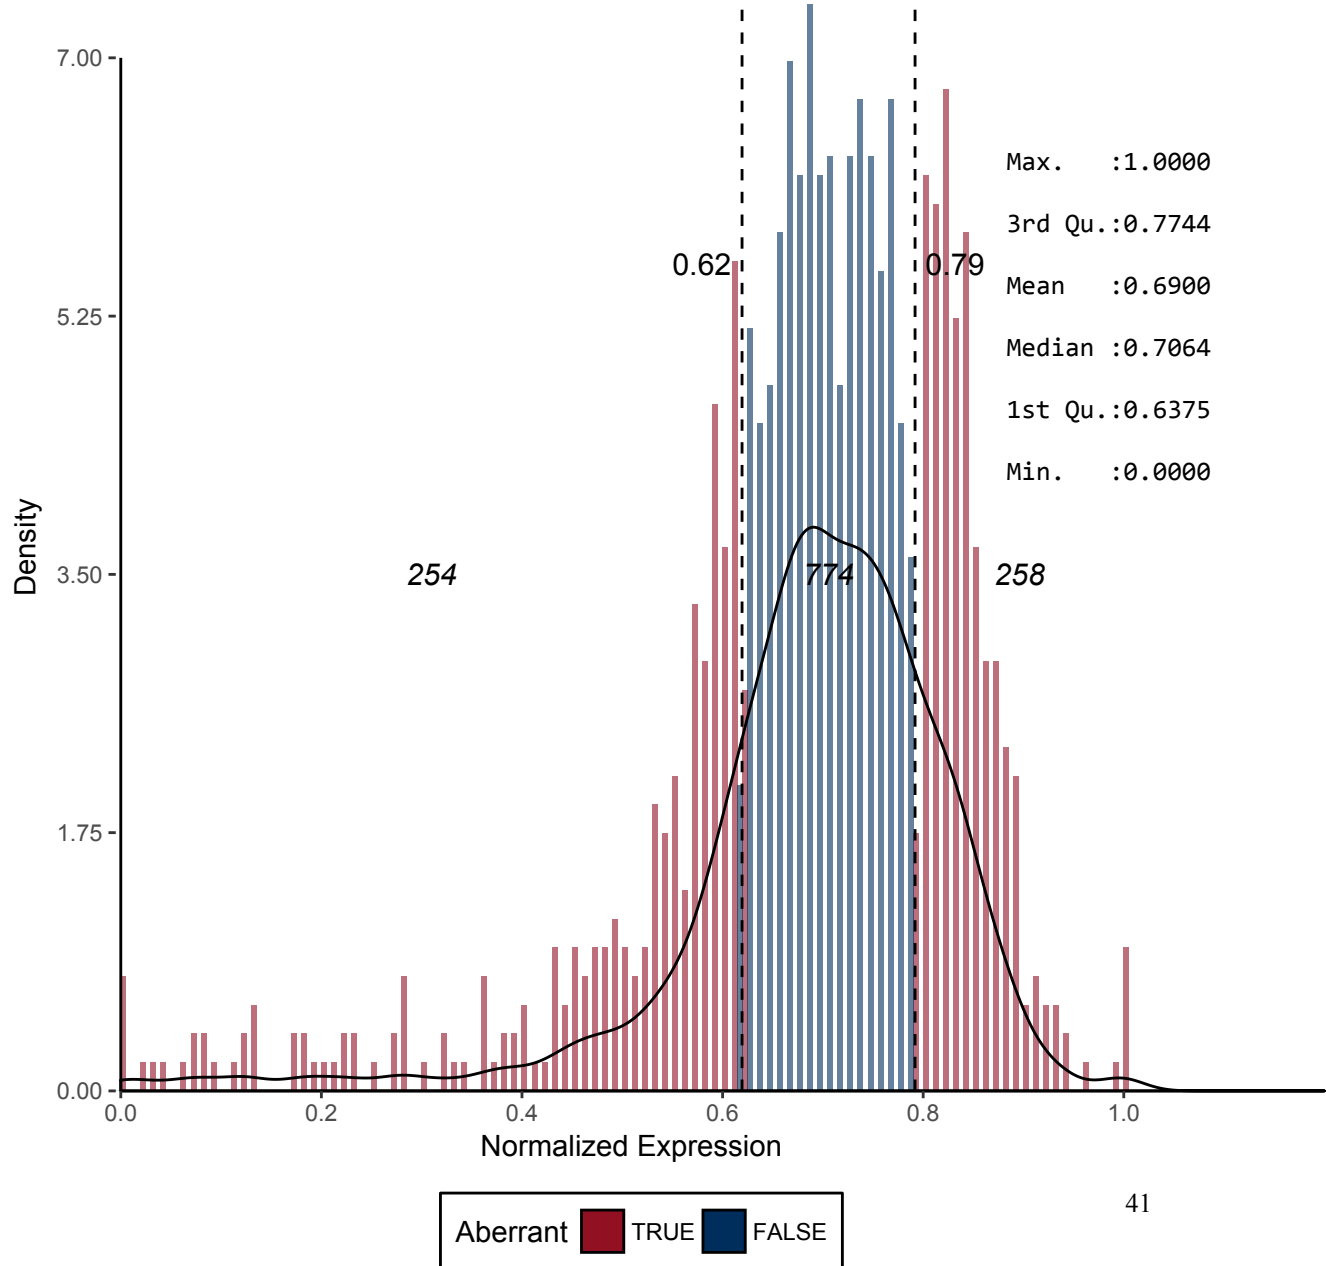

Figure 25 - CD18

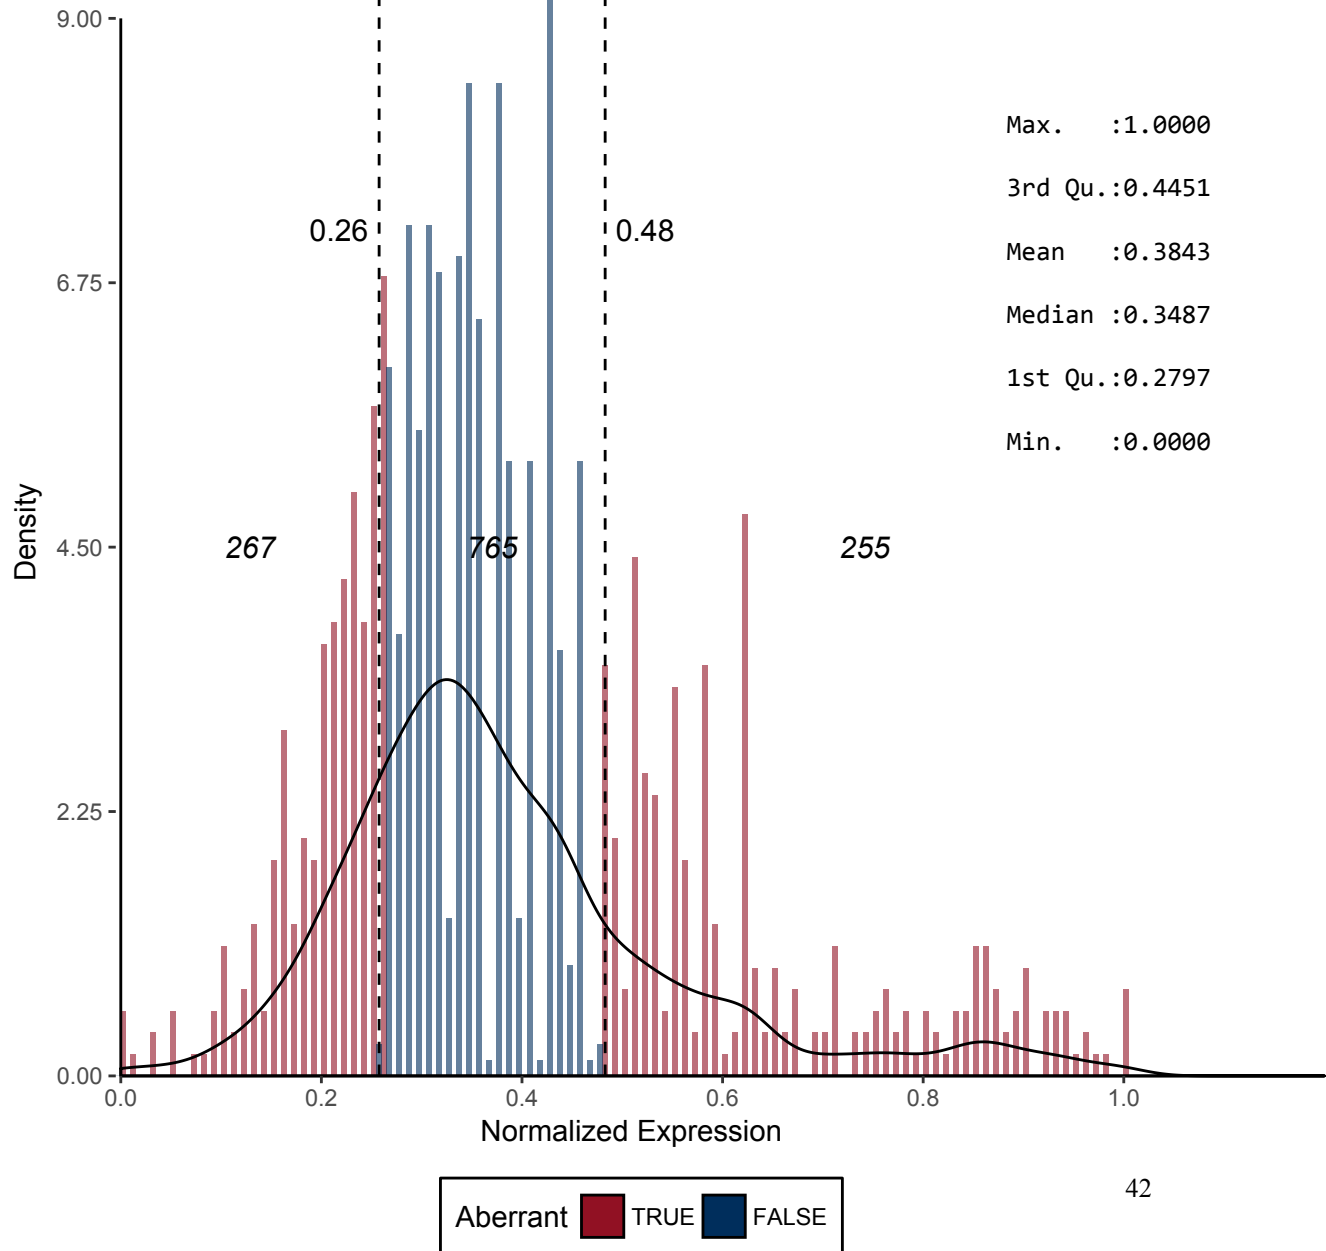

Figure 26 - CD19

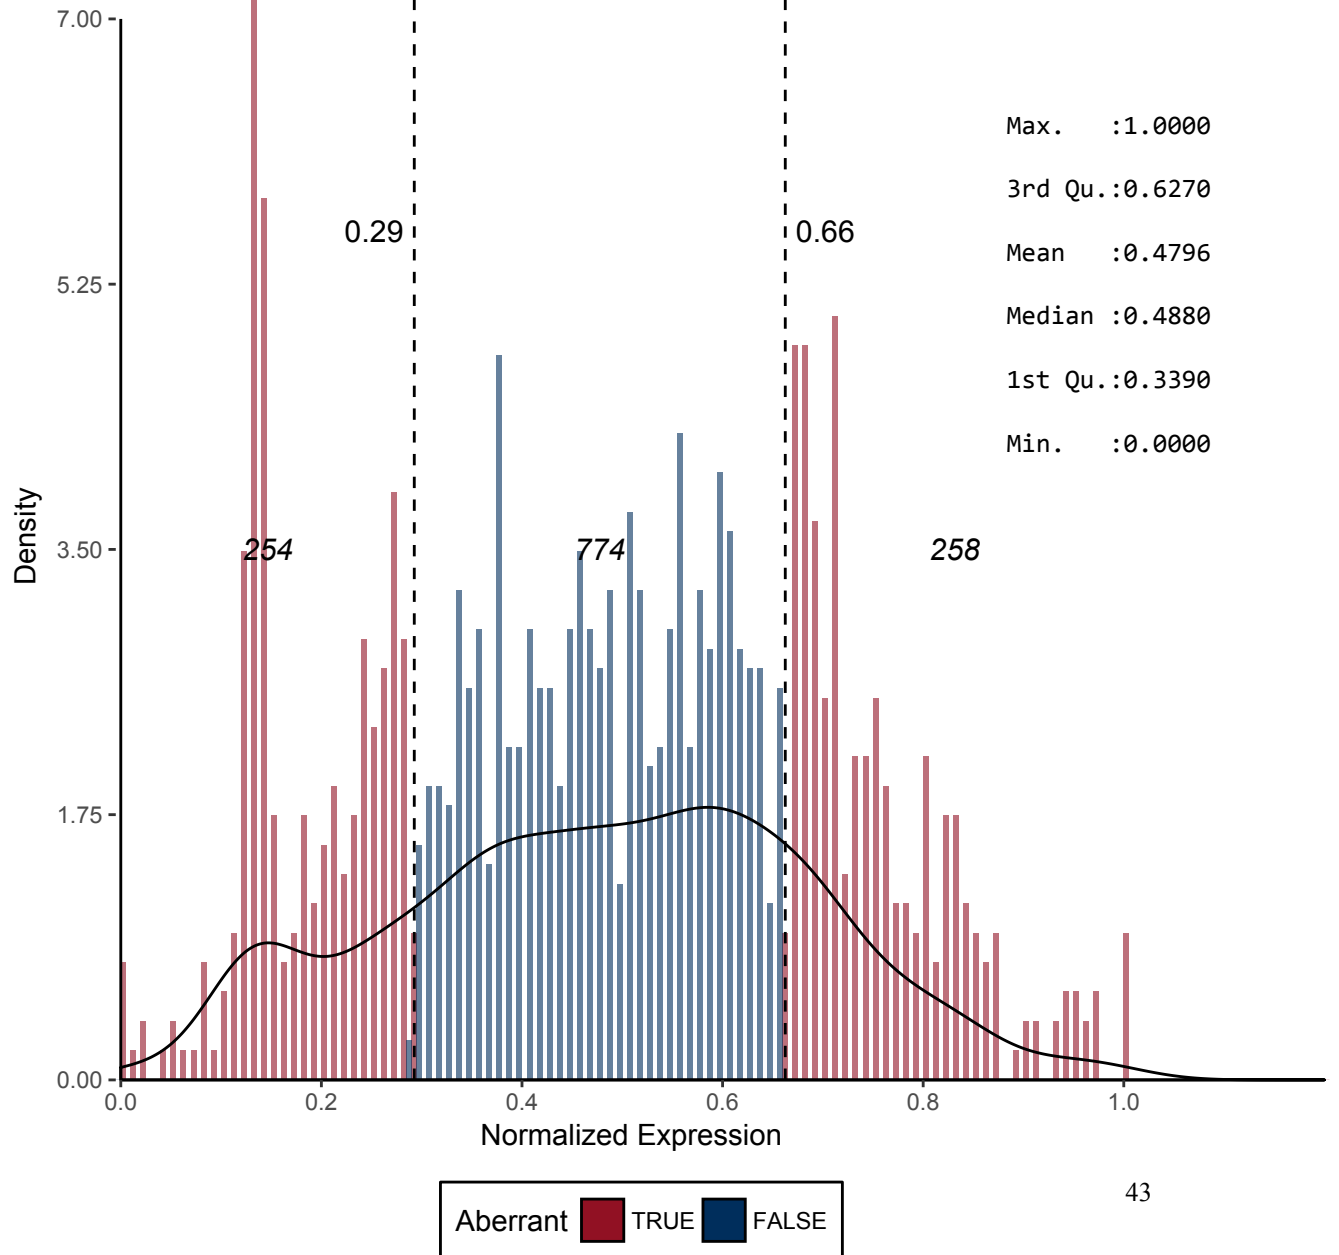

Figure 27 - CD20

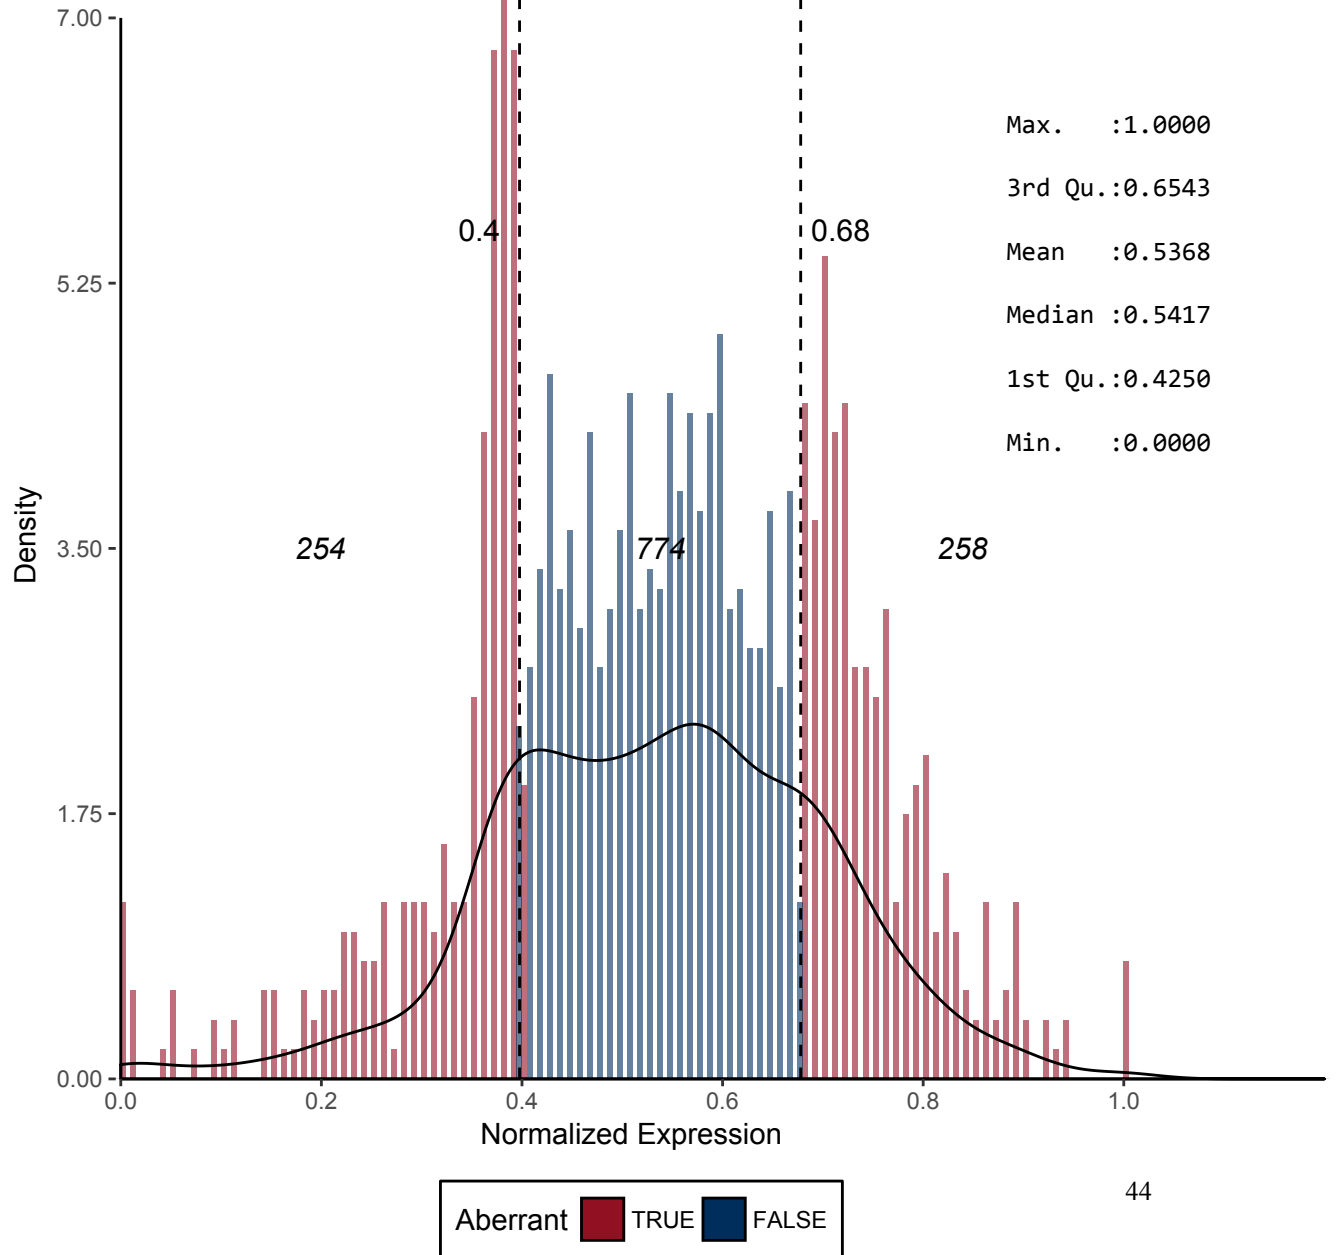

Figure 28 - CD21

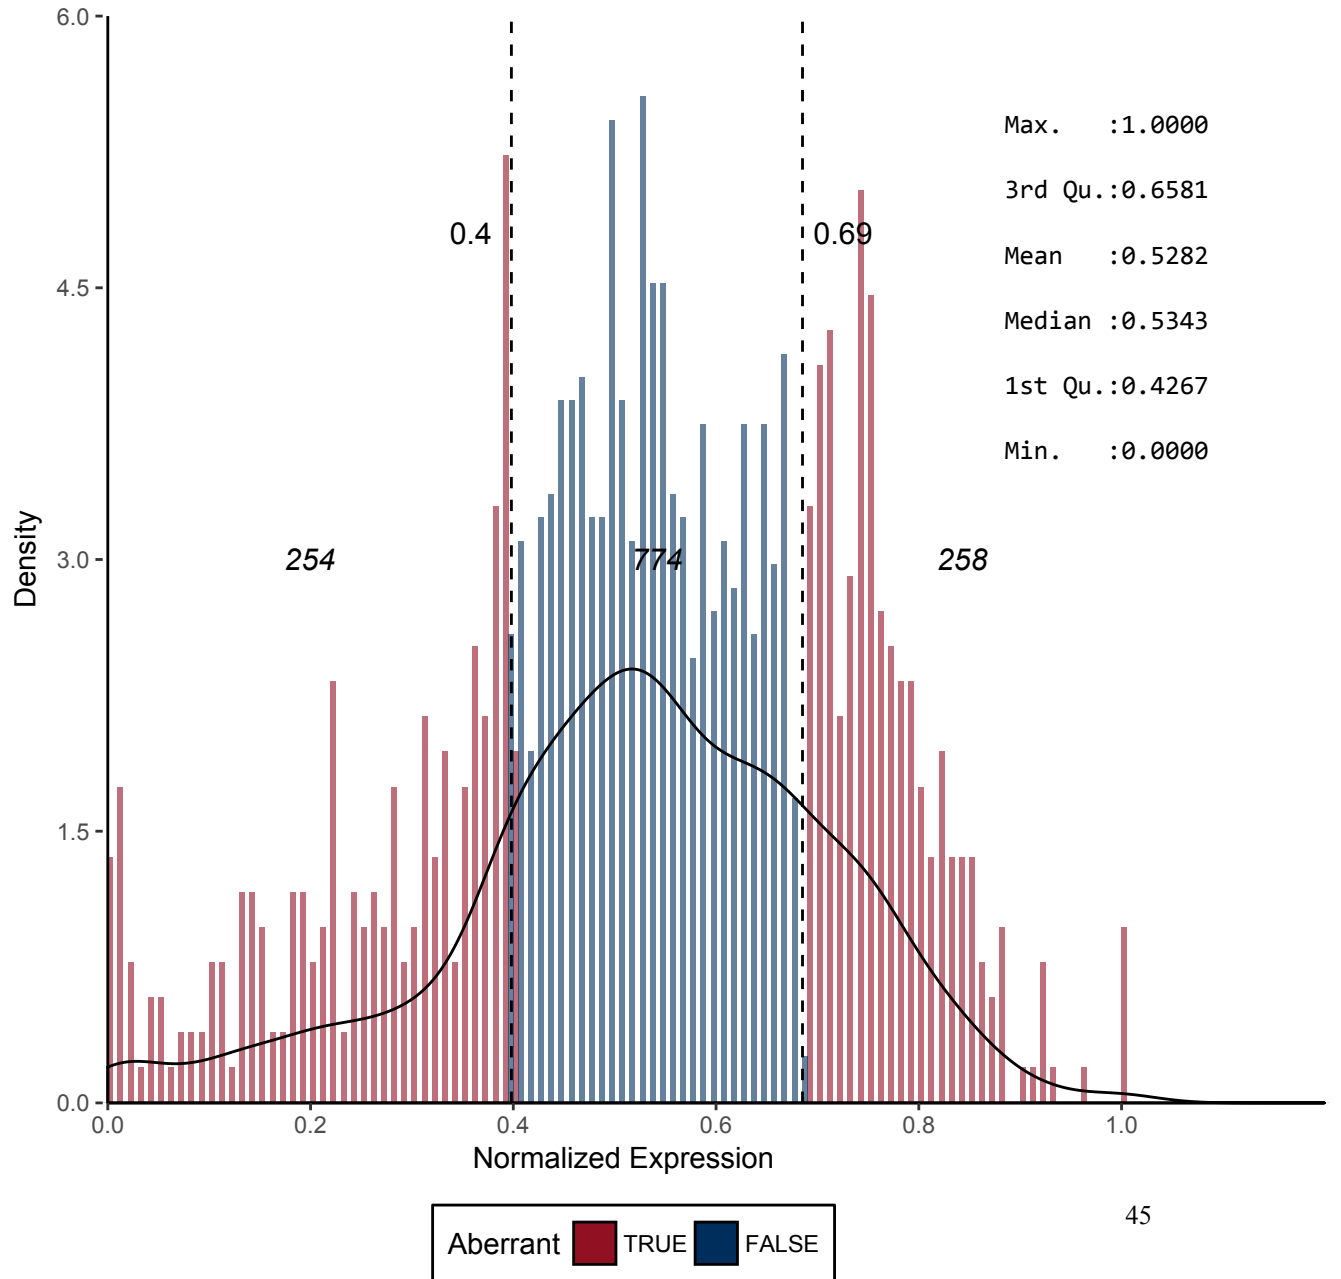

Figure 29 - CD22

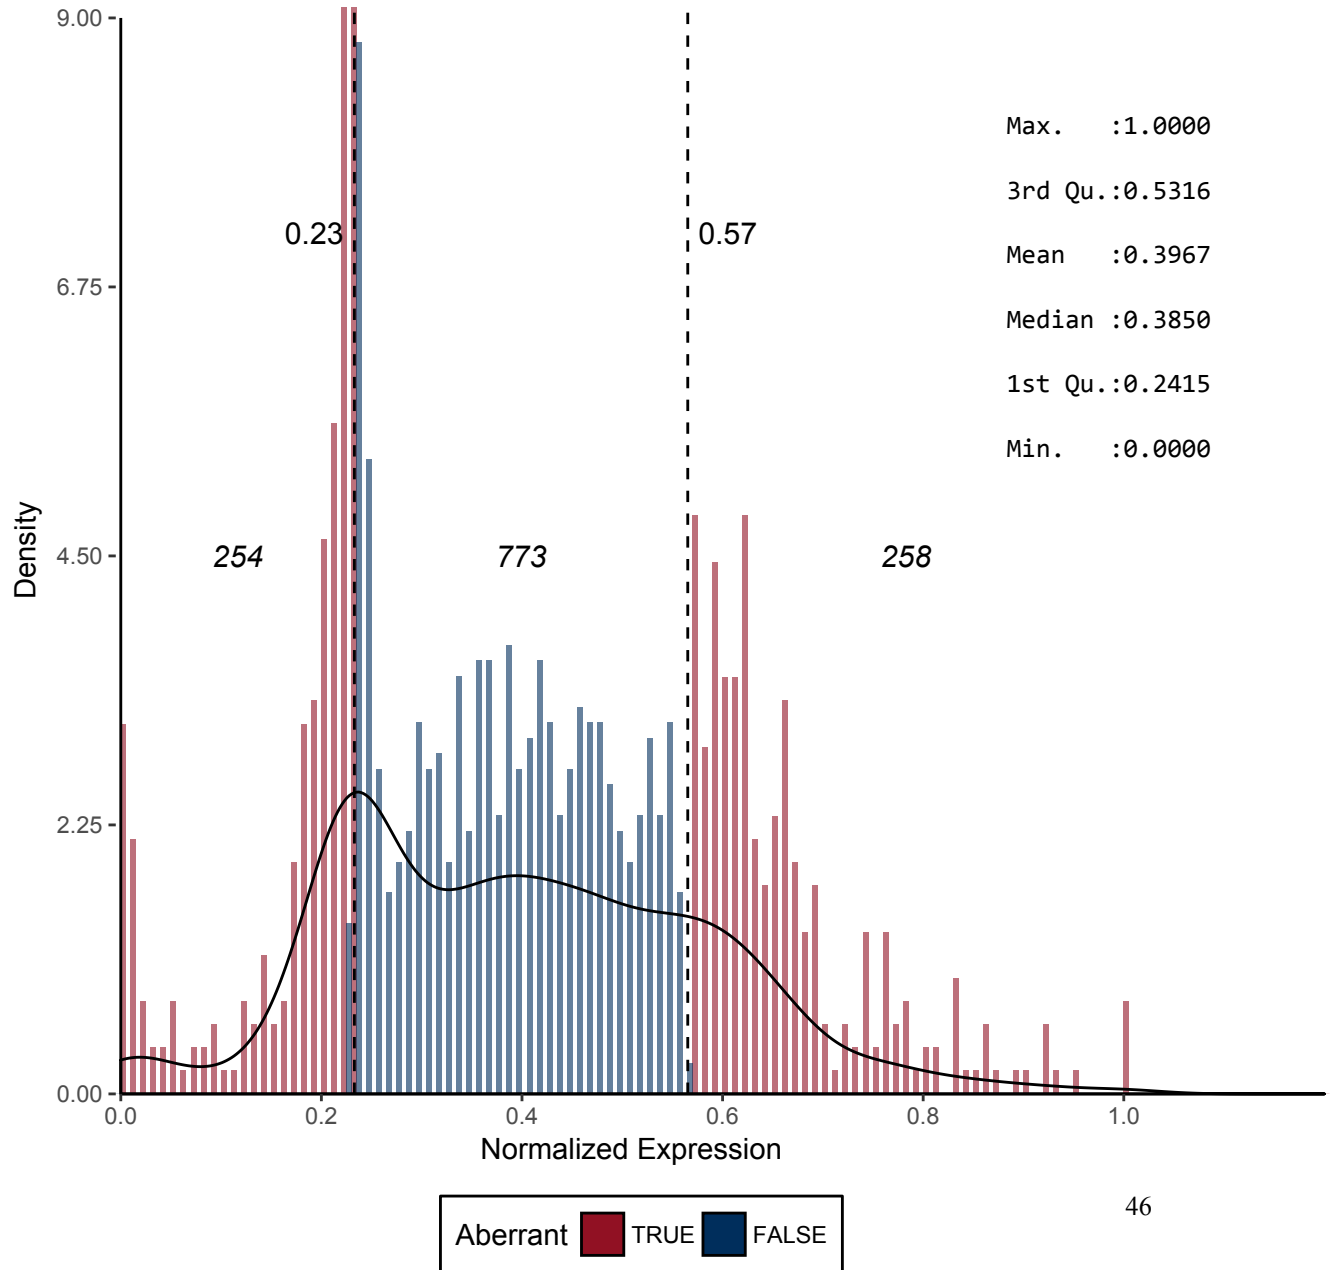

Figure 30 - CD23

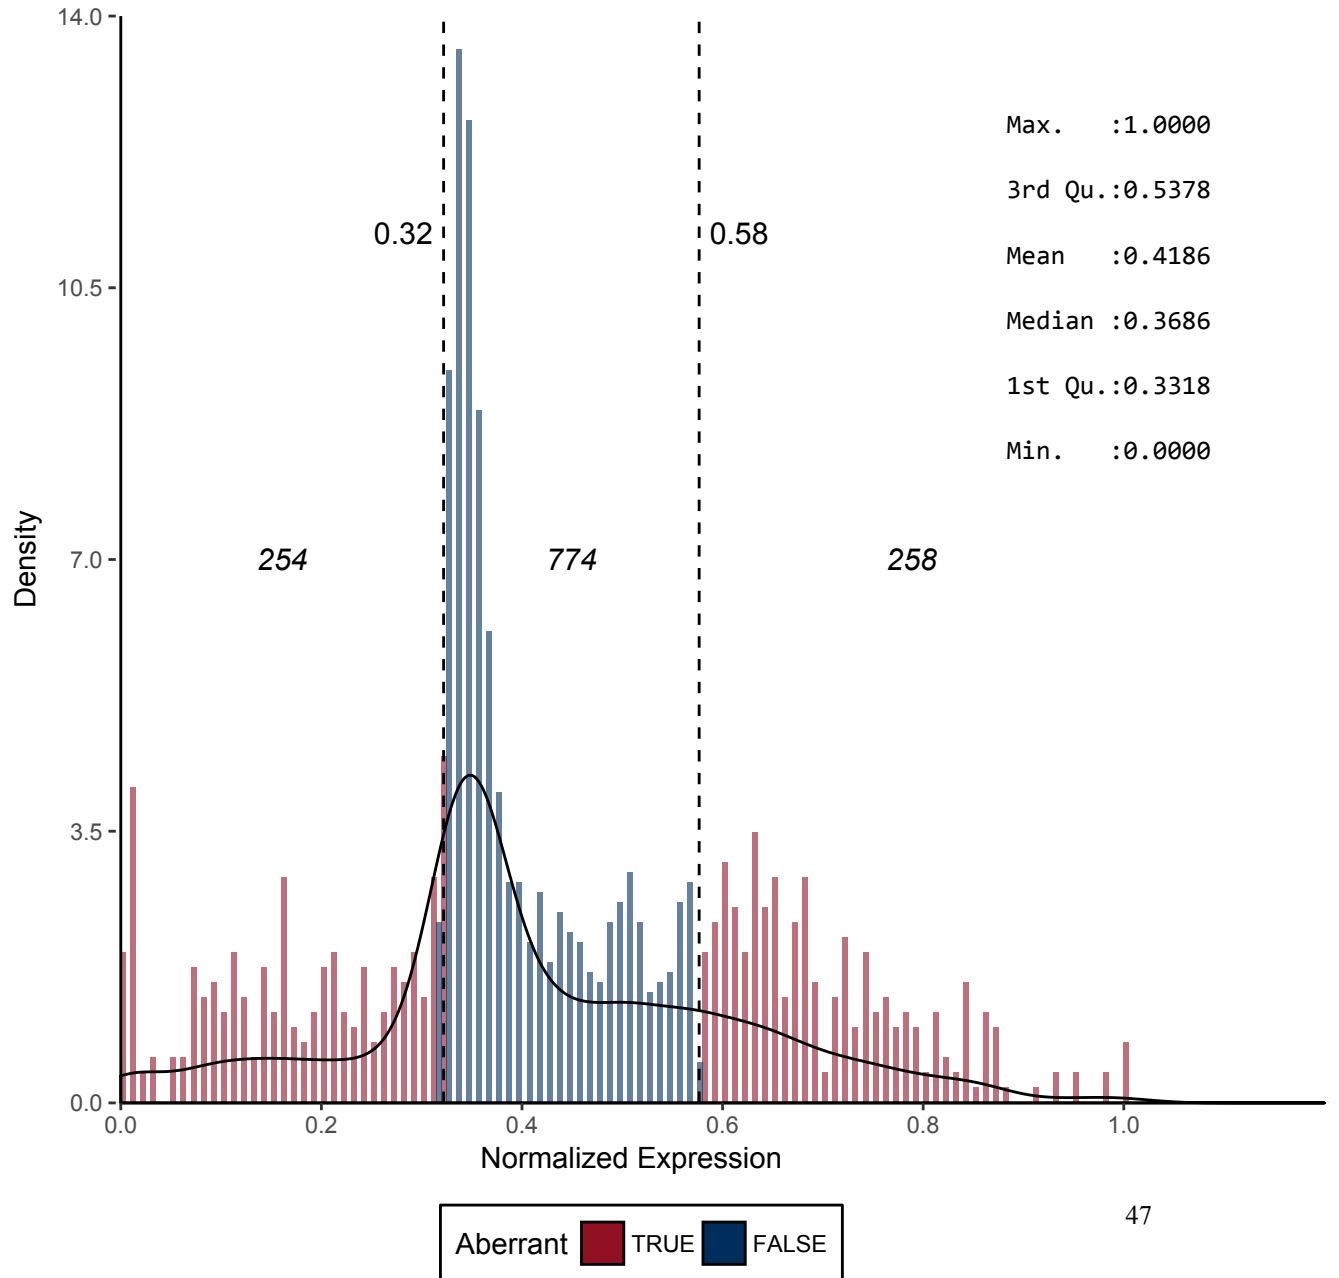

Figure 31 - CD25

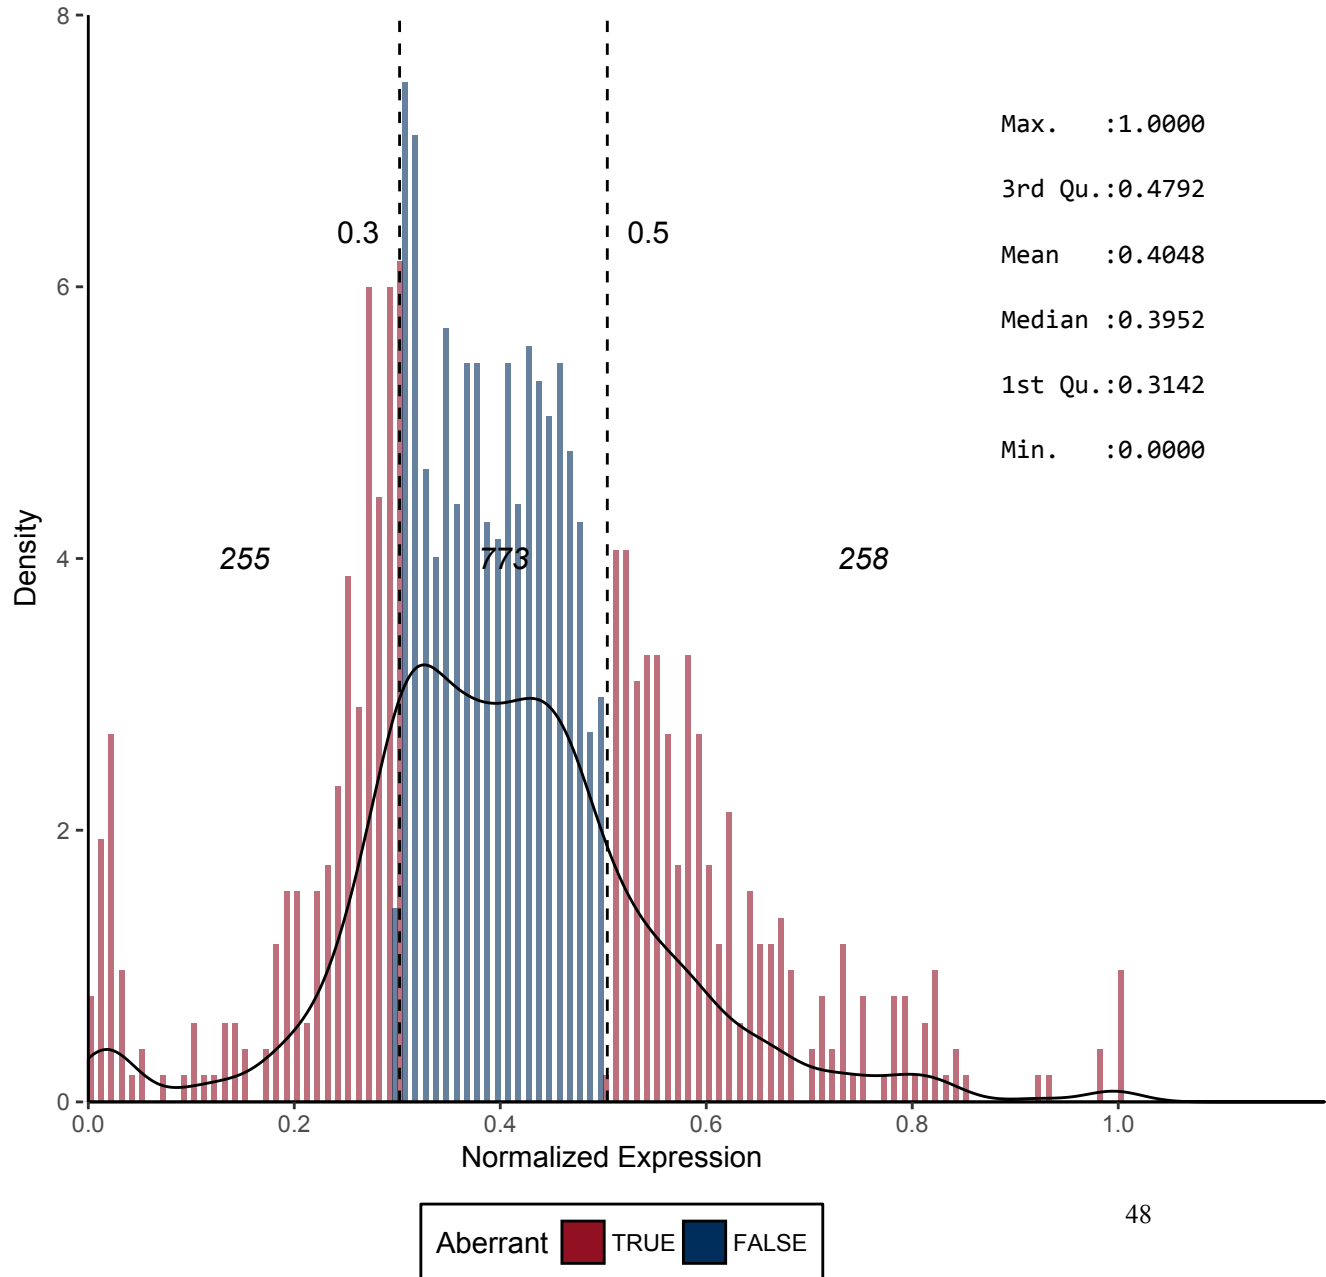



Figure 32 - CD26

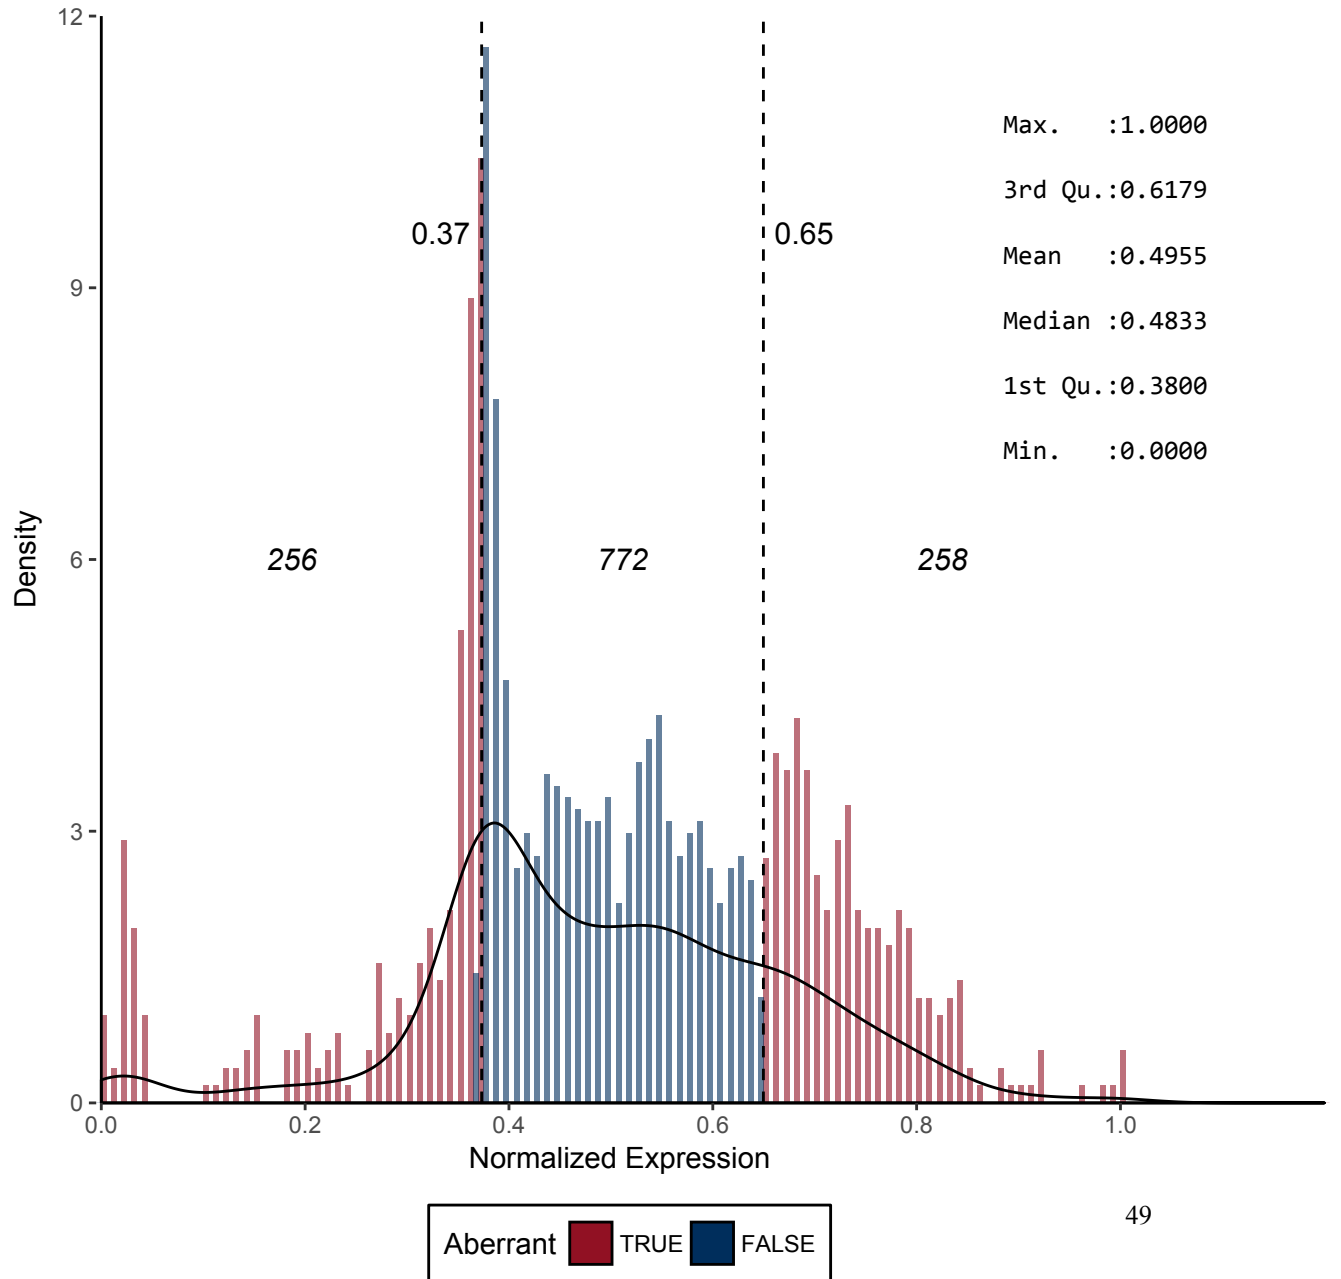

Figure 33 - CD27

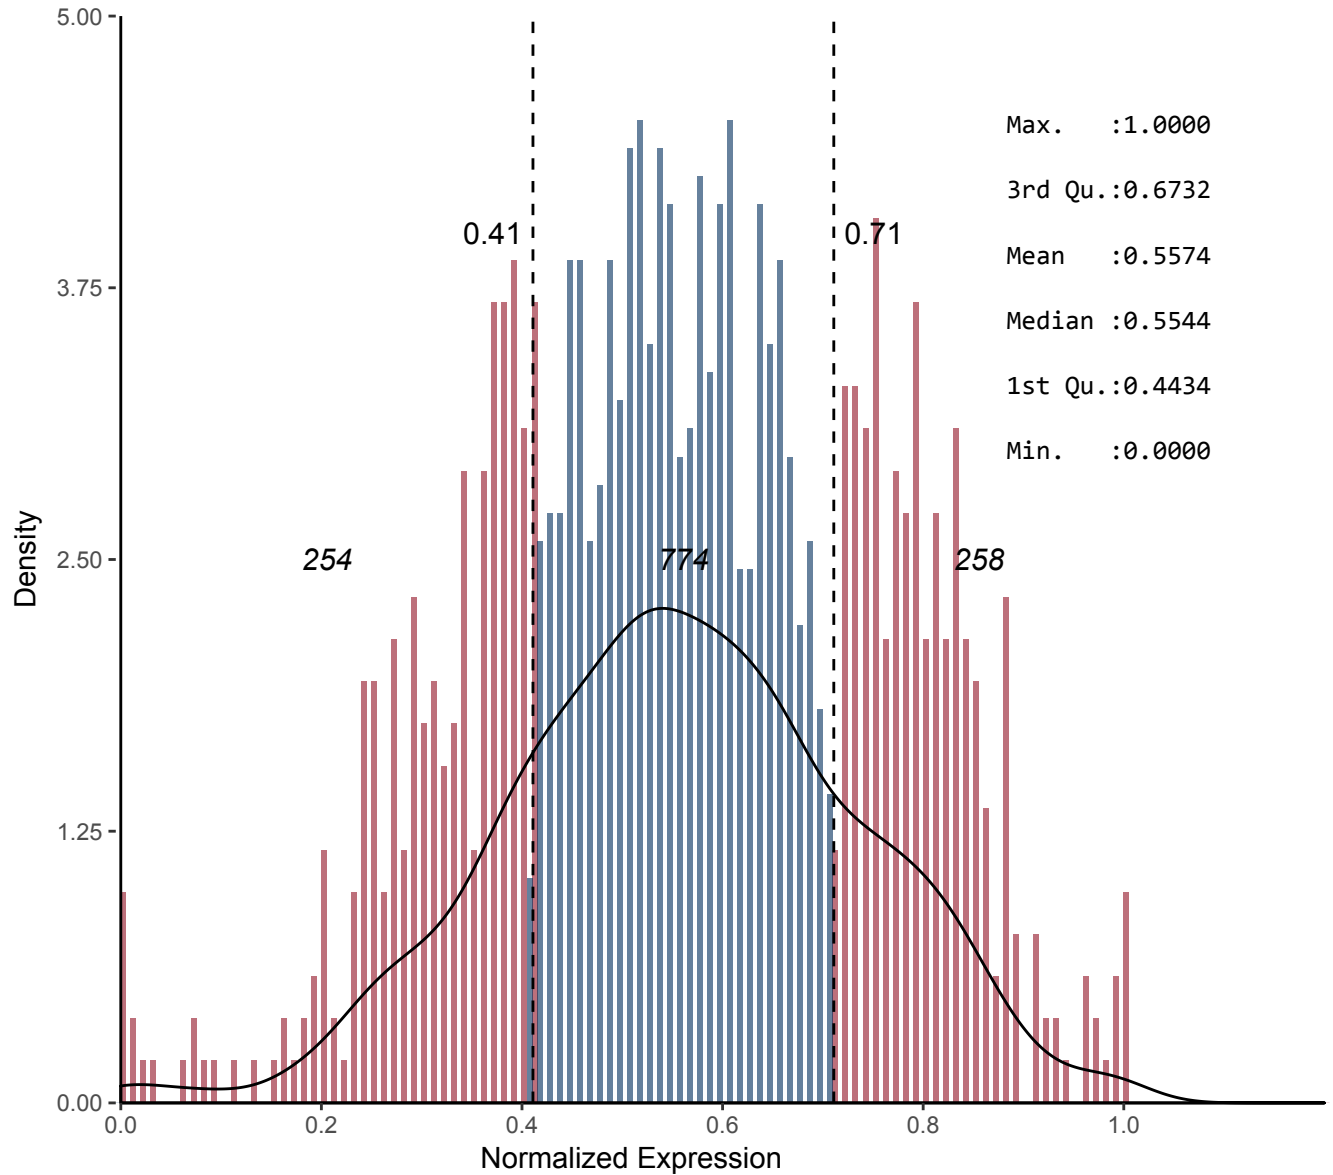

Aberrant TRUE FALSE

Figure 34 - CD28

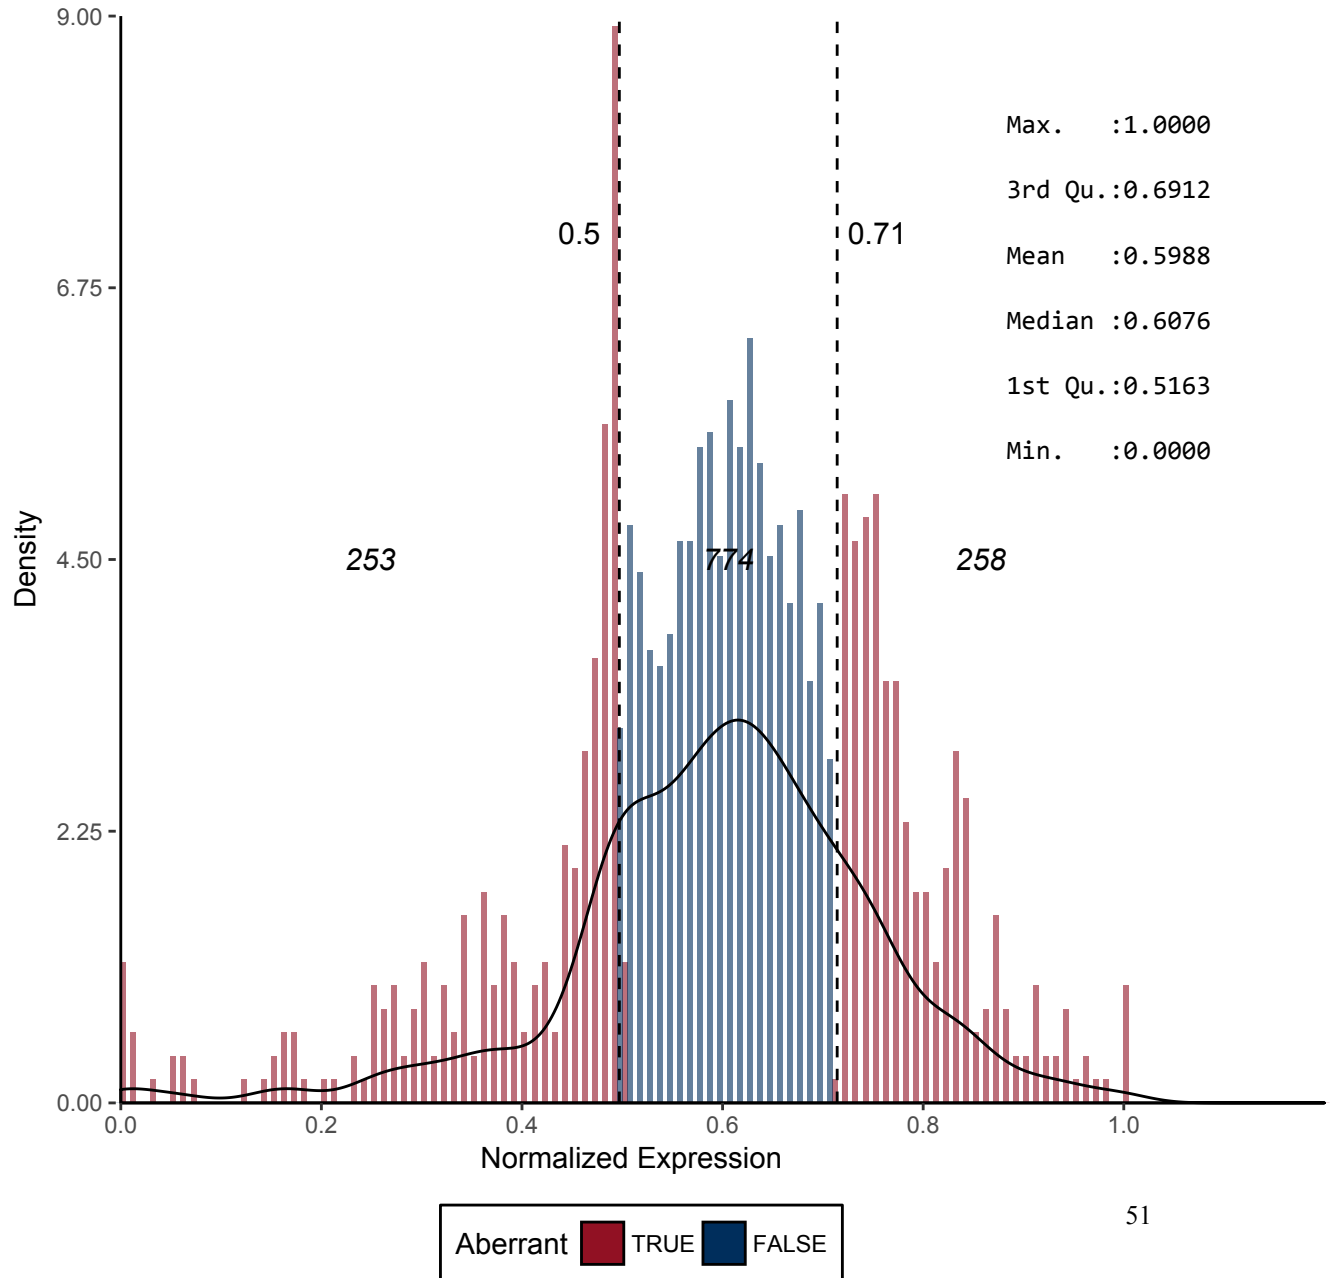

Figure 35 - CD30

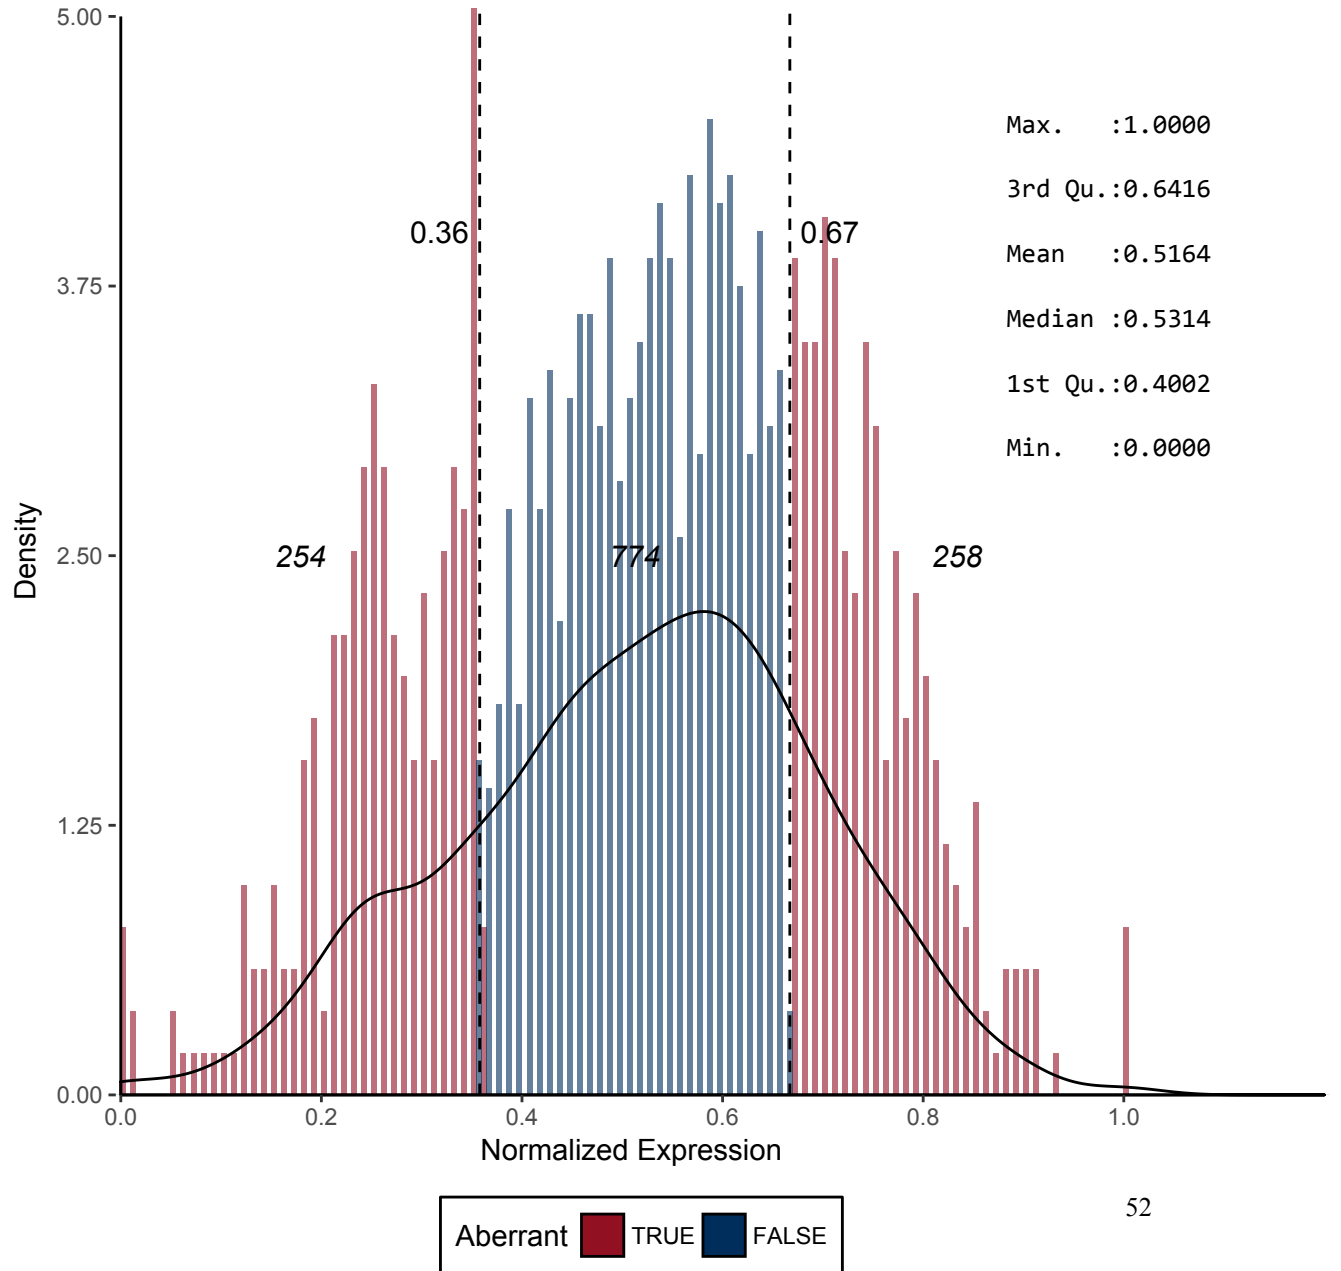

Figure 36 - CD31

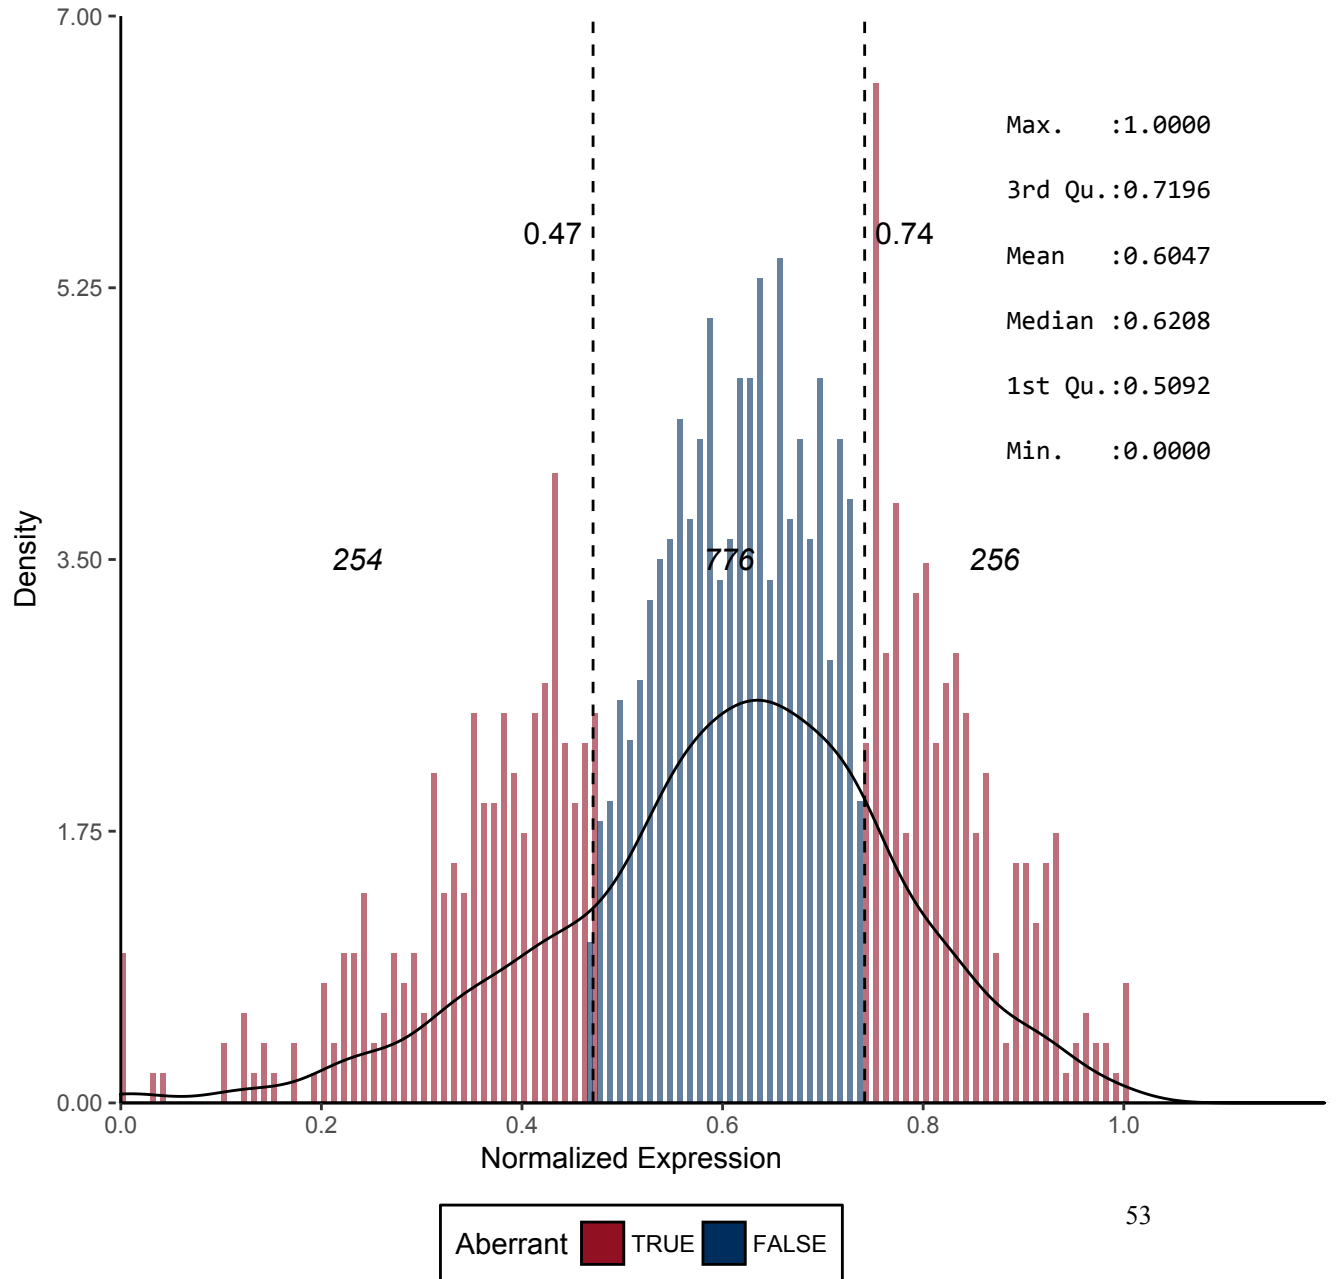

Figure 37 - CD33

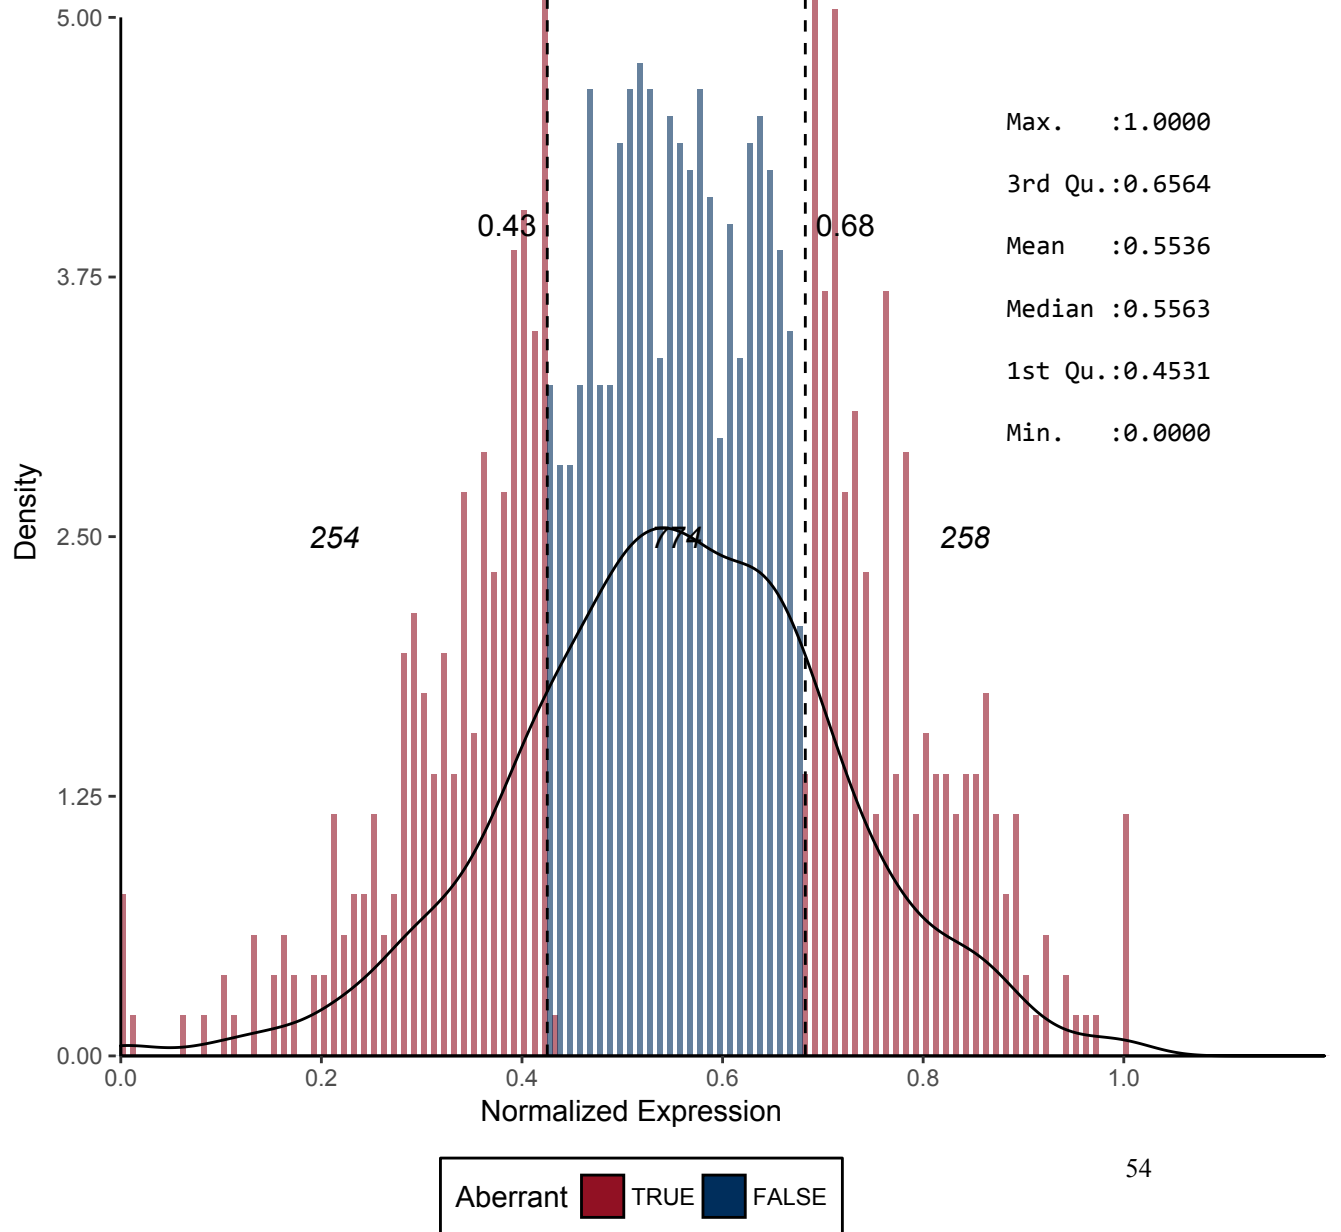

Figure 38 - CD34\*

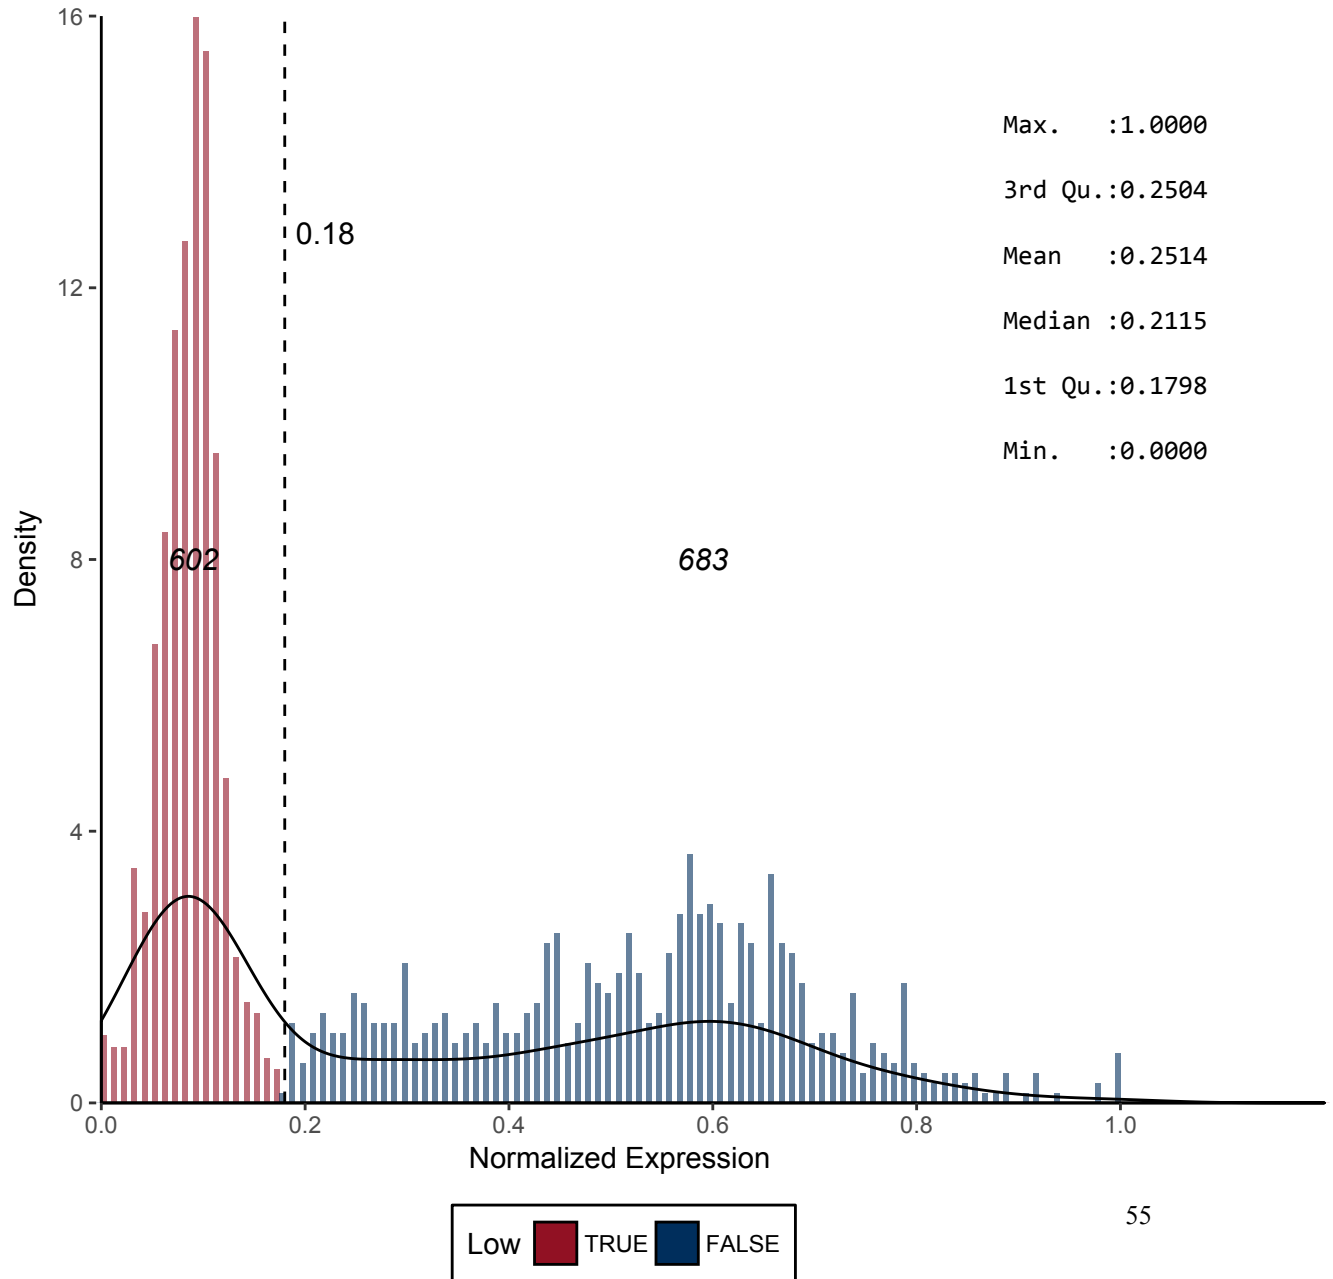

Figure 39 - CD35

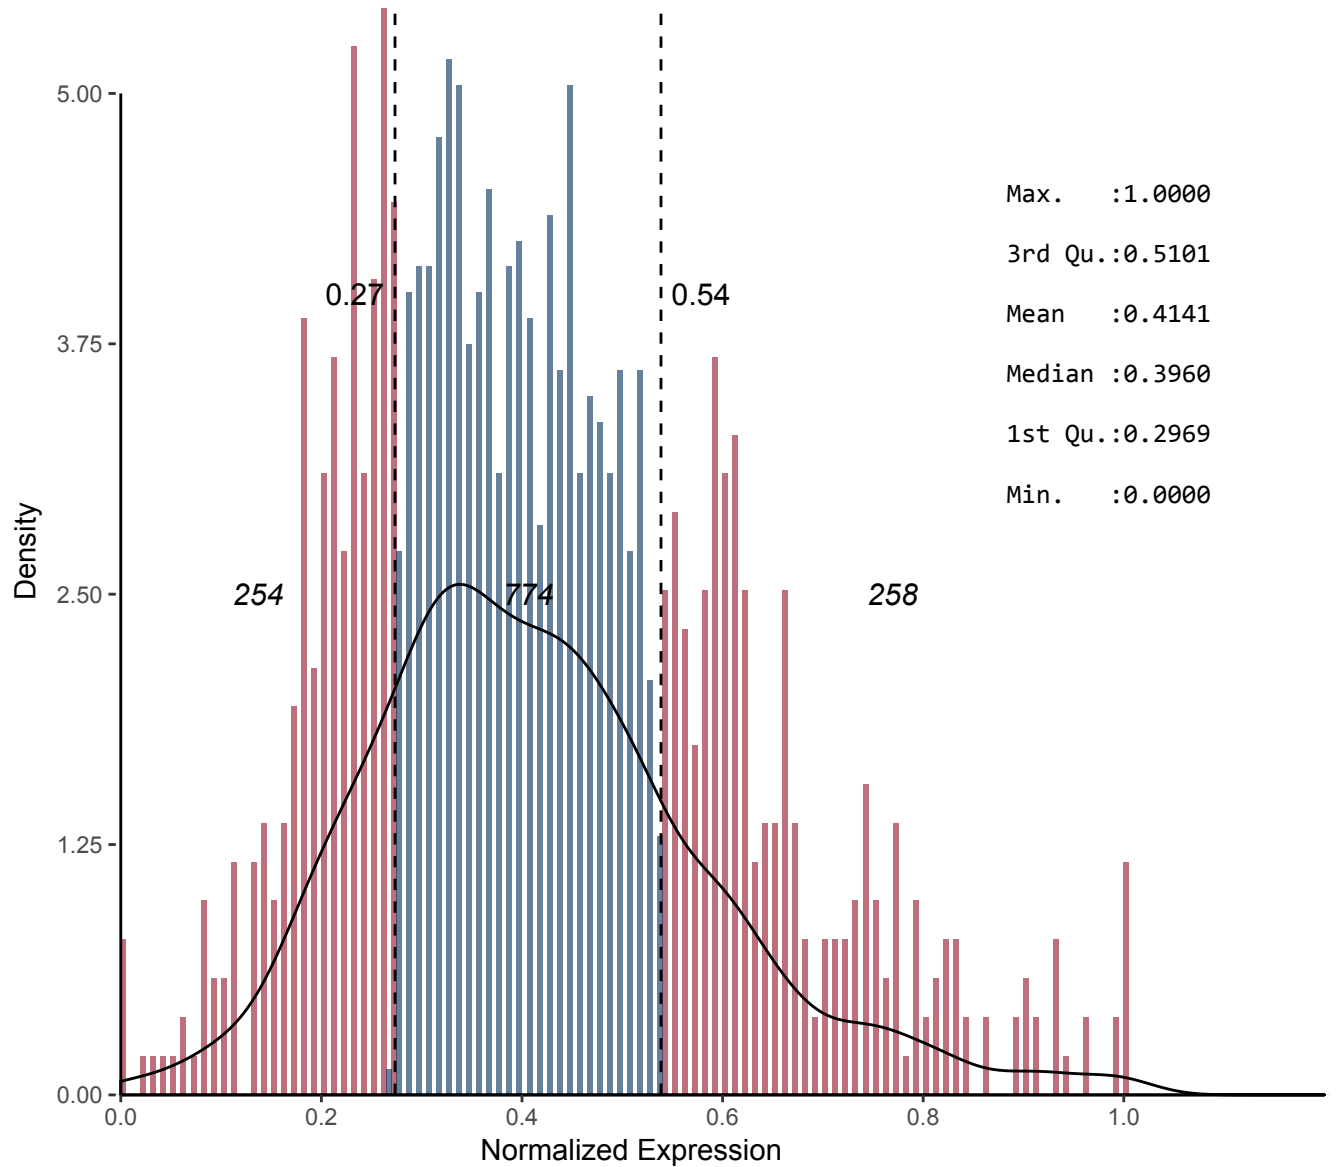

Aberrant TRUE FALSE



Figure 40 - CD36

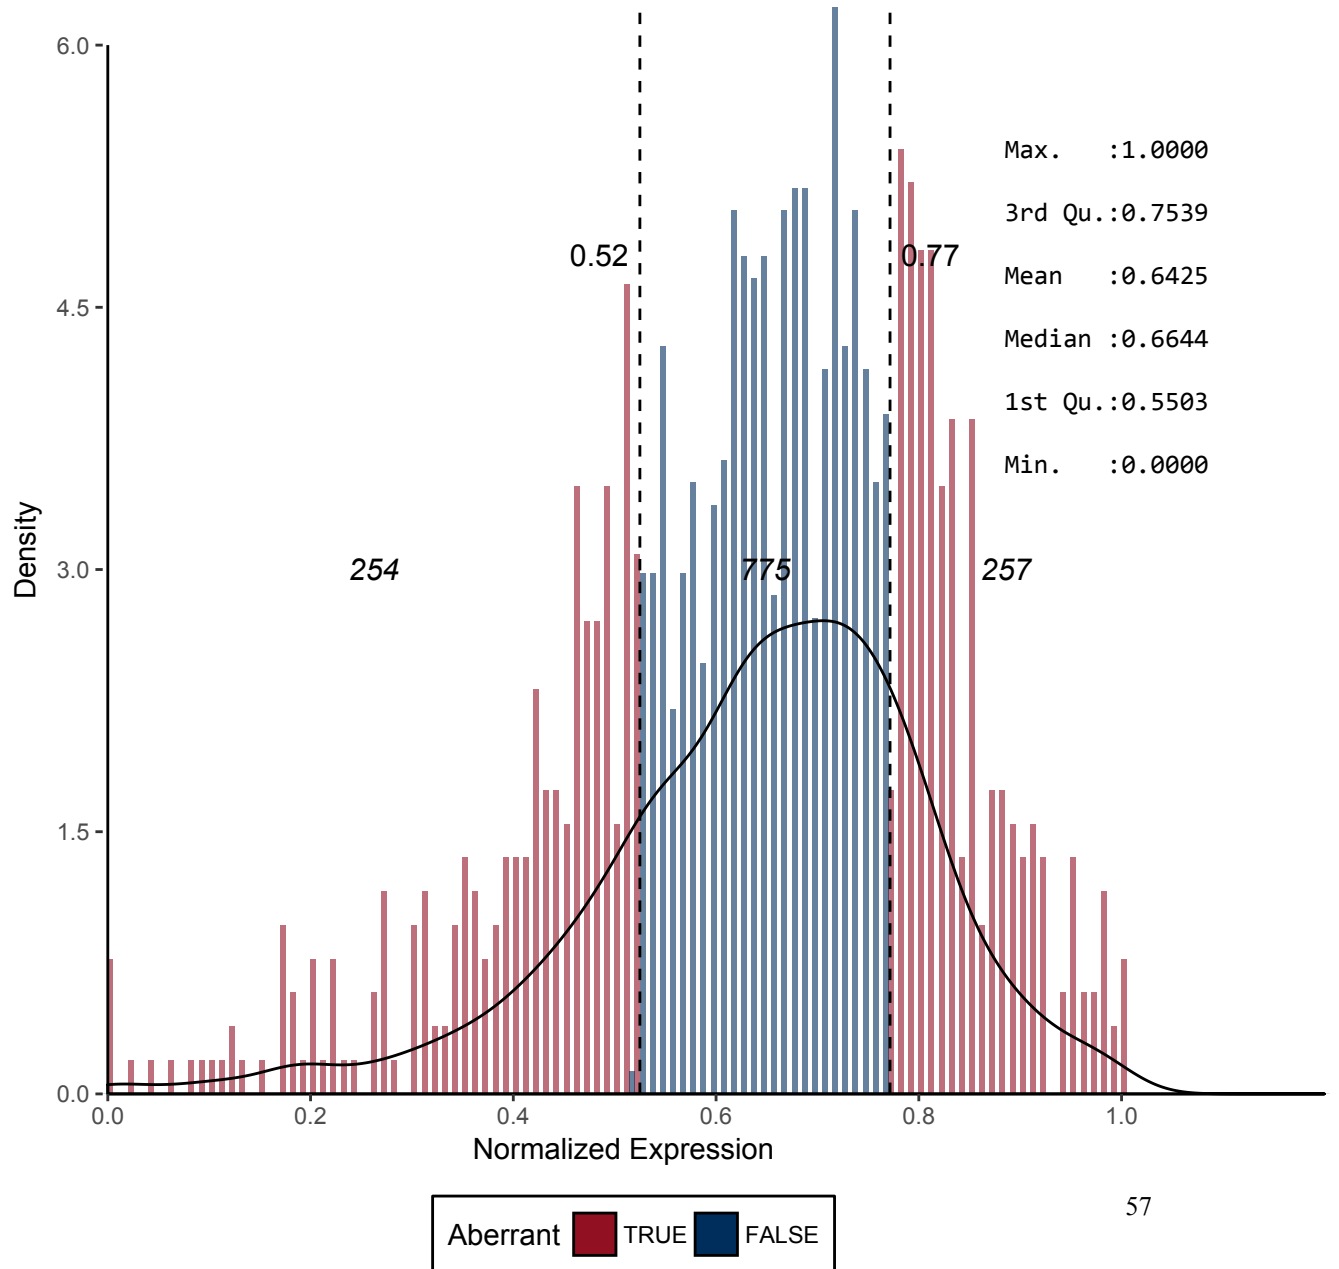

Figure 41 - CD37

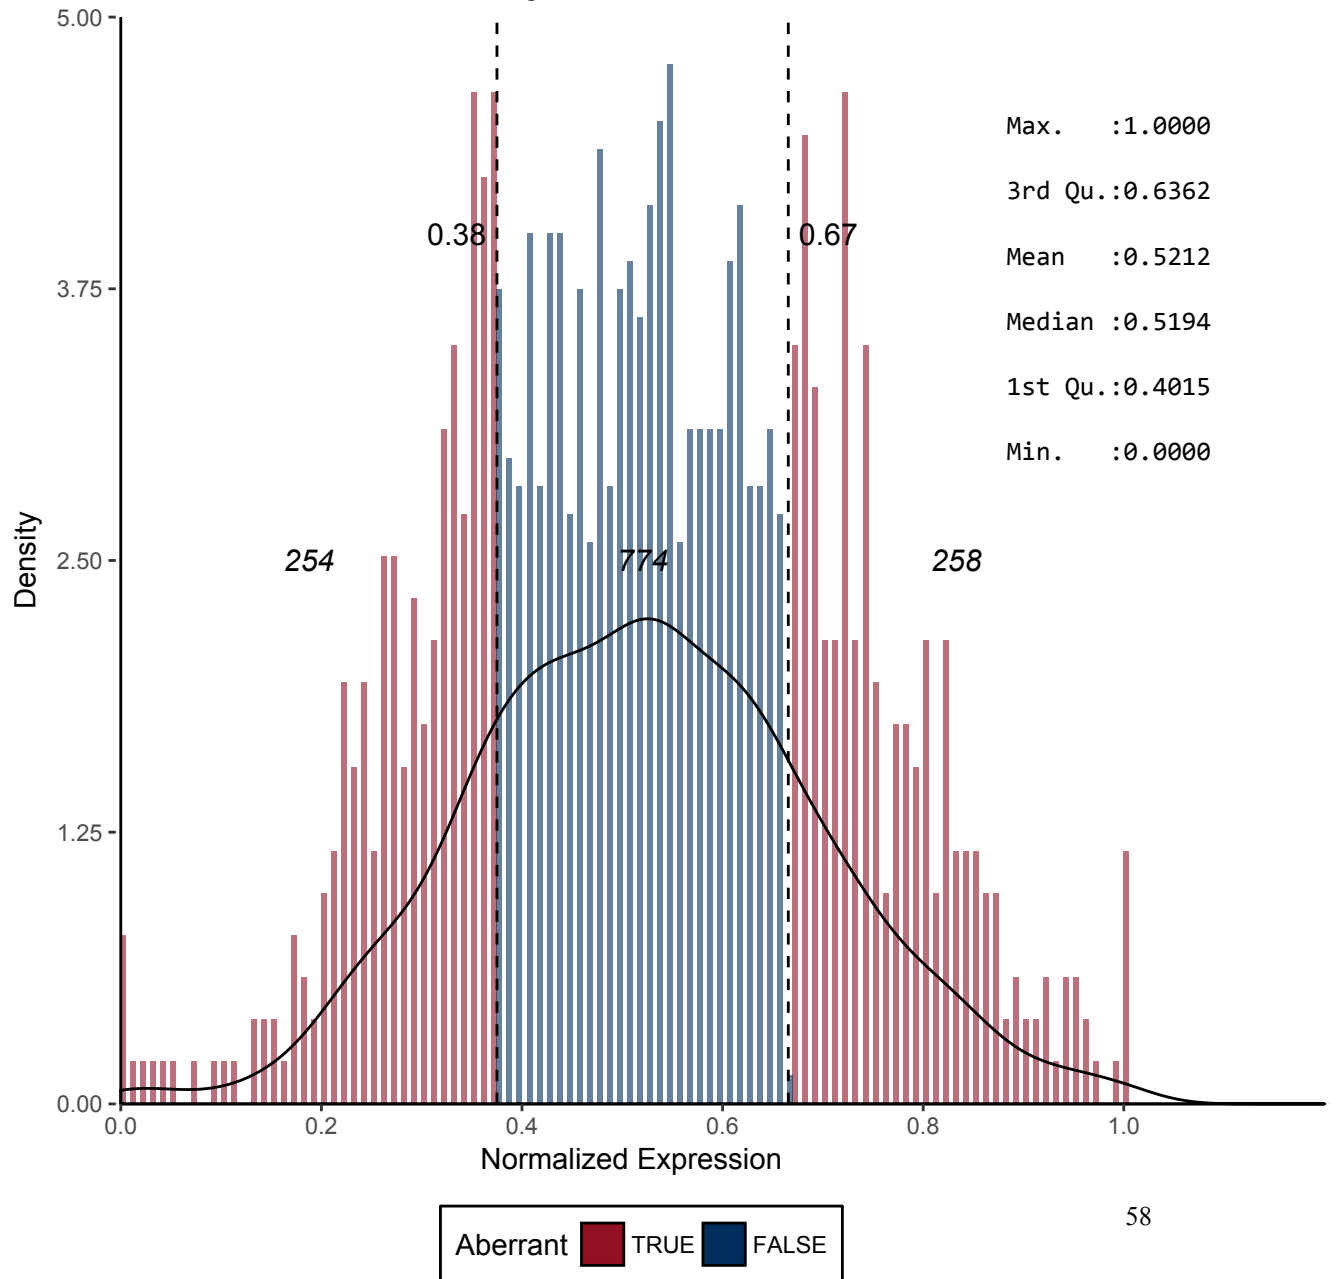

Figure 42 - CD38

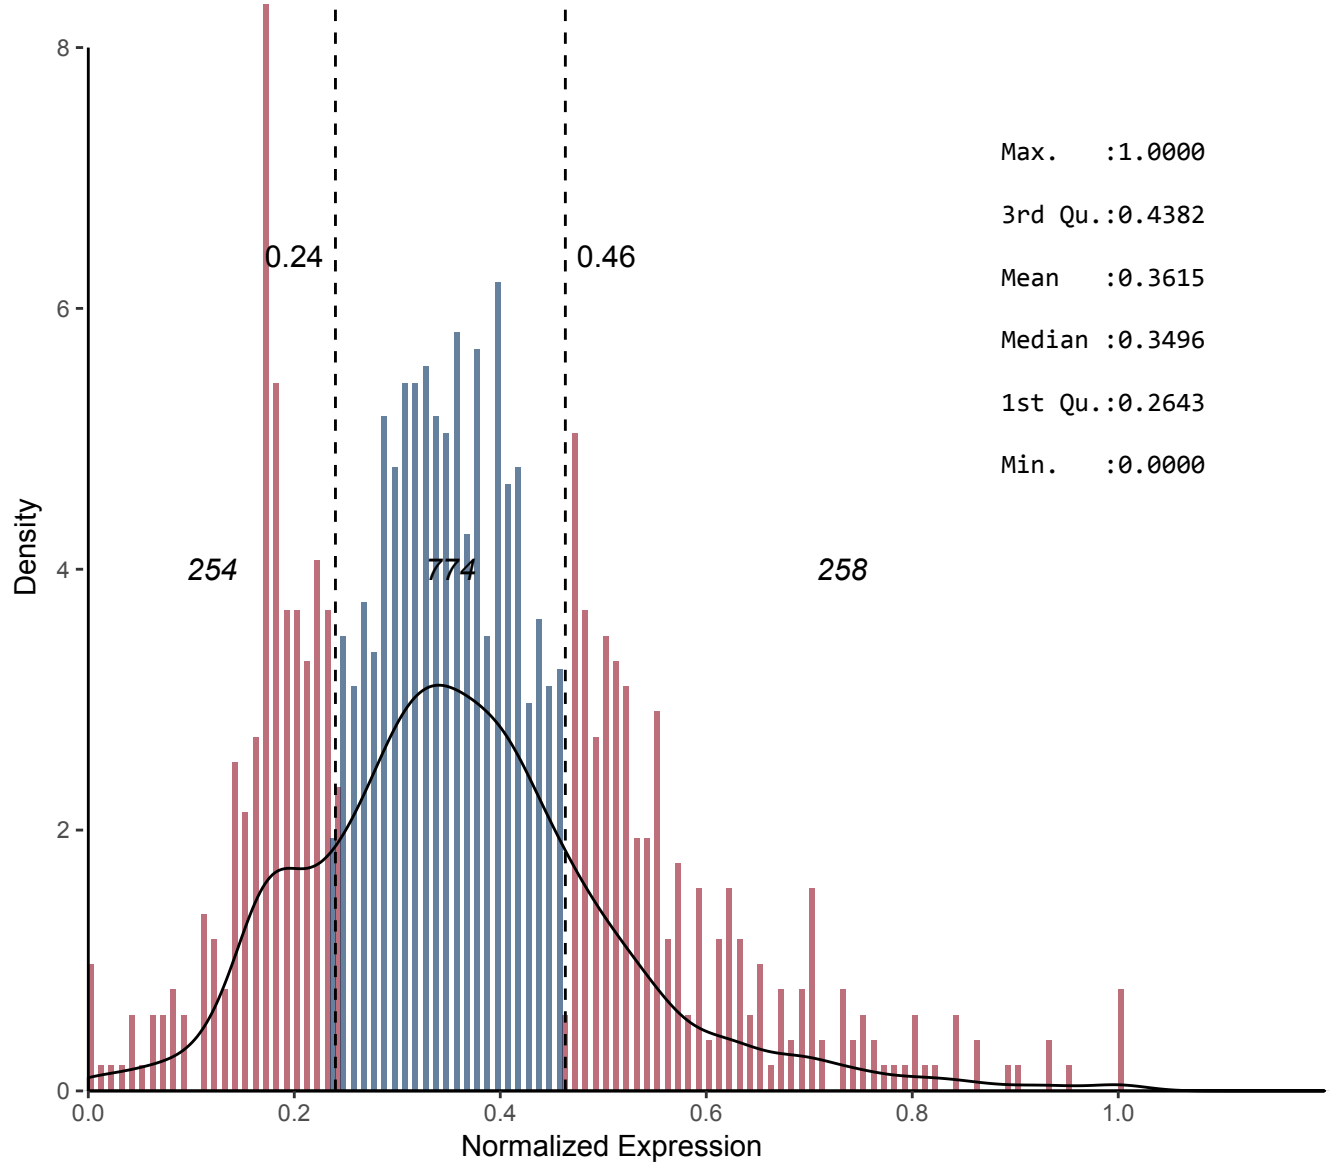

Aberrant TRUE FALSE

Figure 43 - CD39

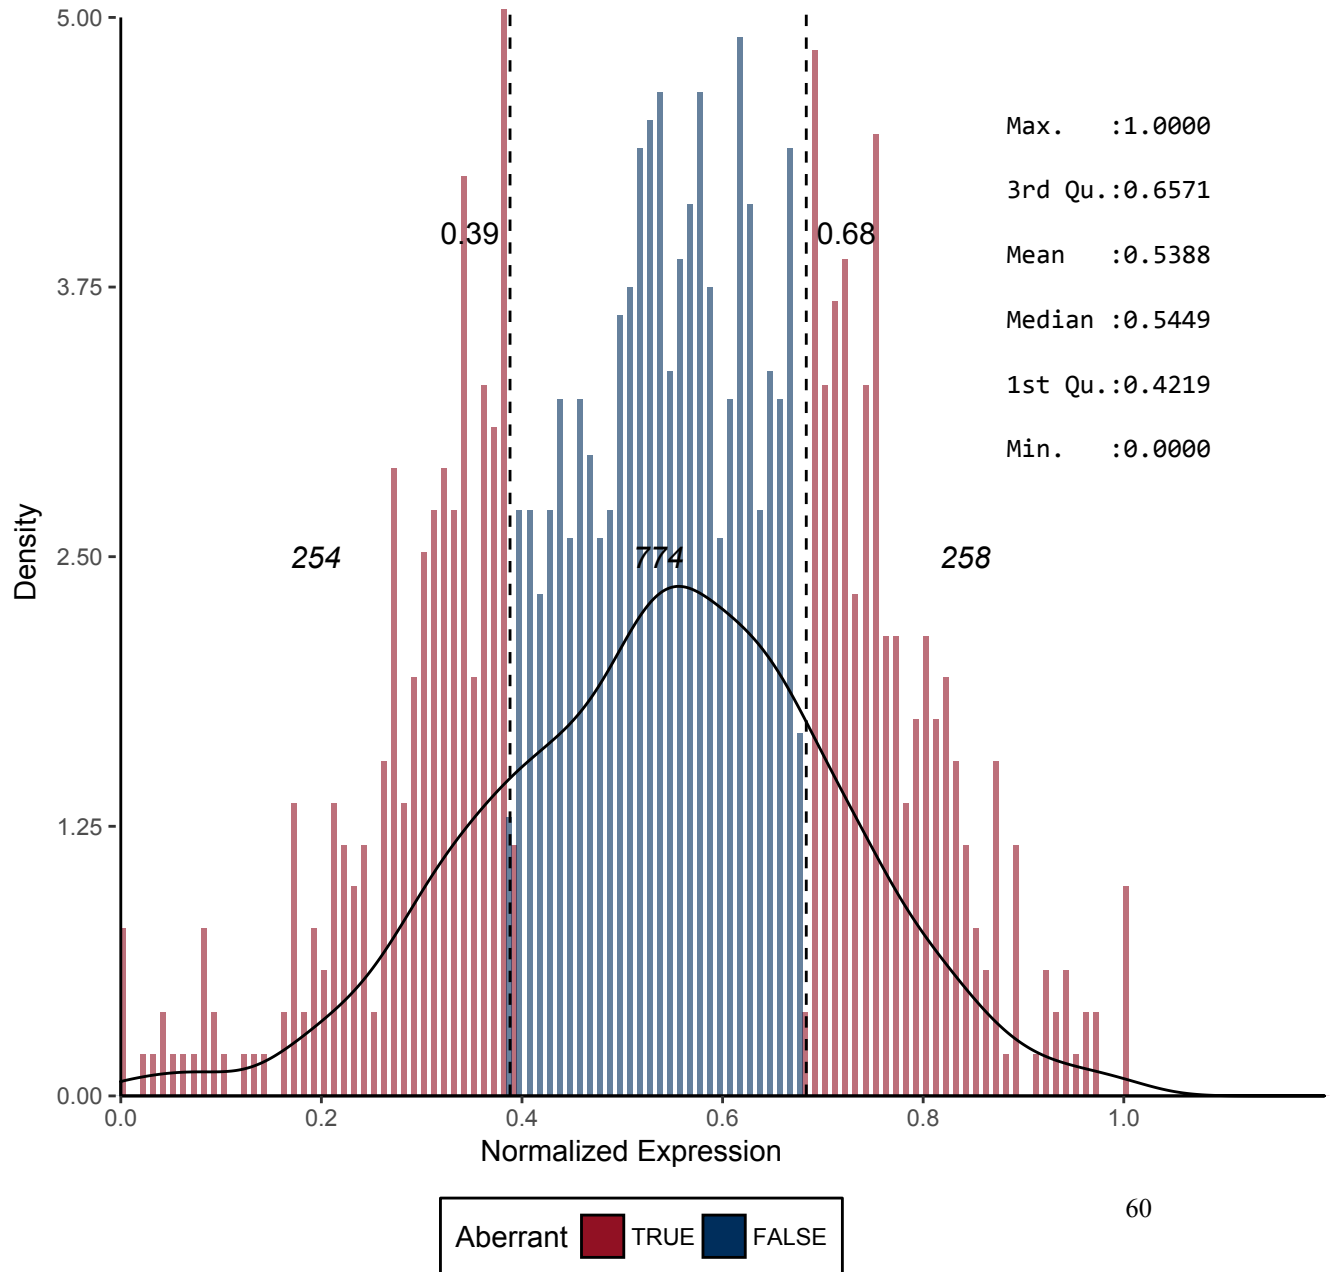

Figure 44 - CD40

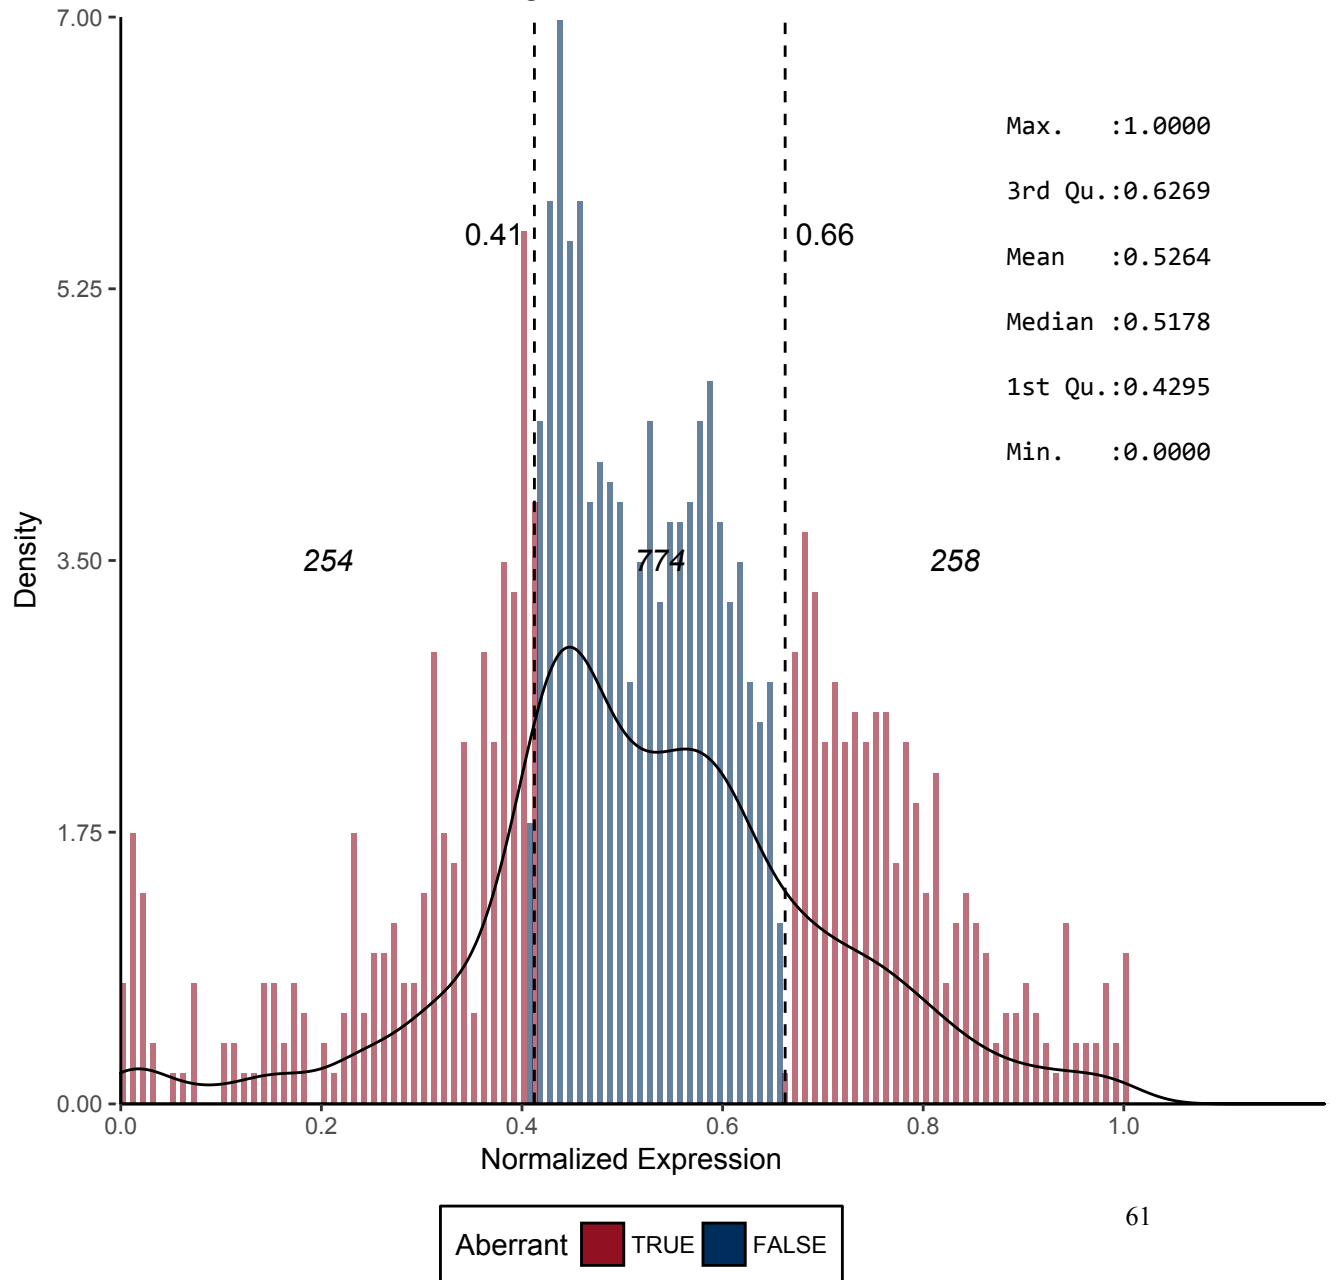

Figure 45 - CD41

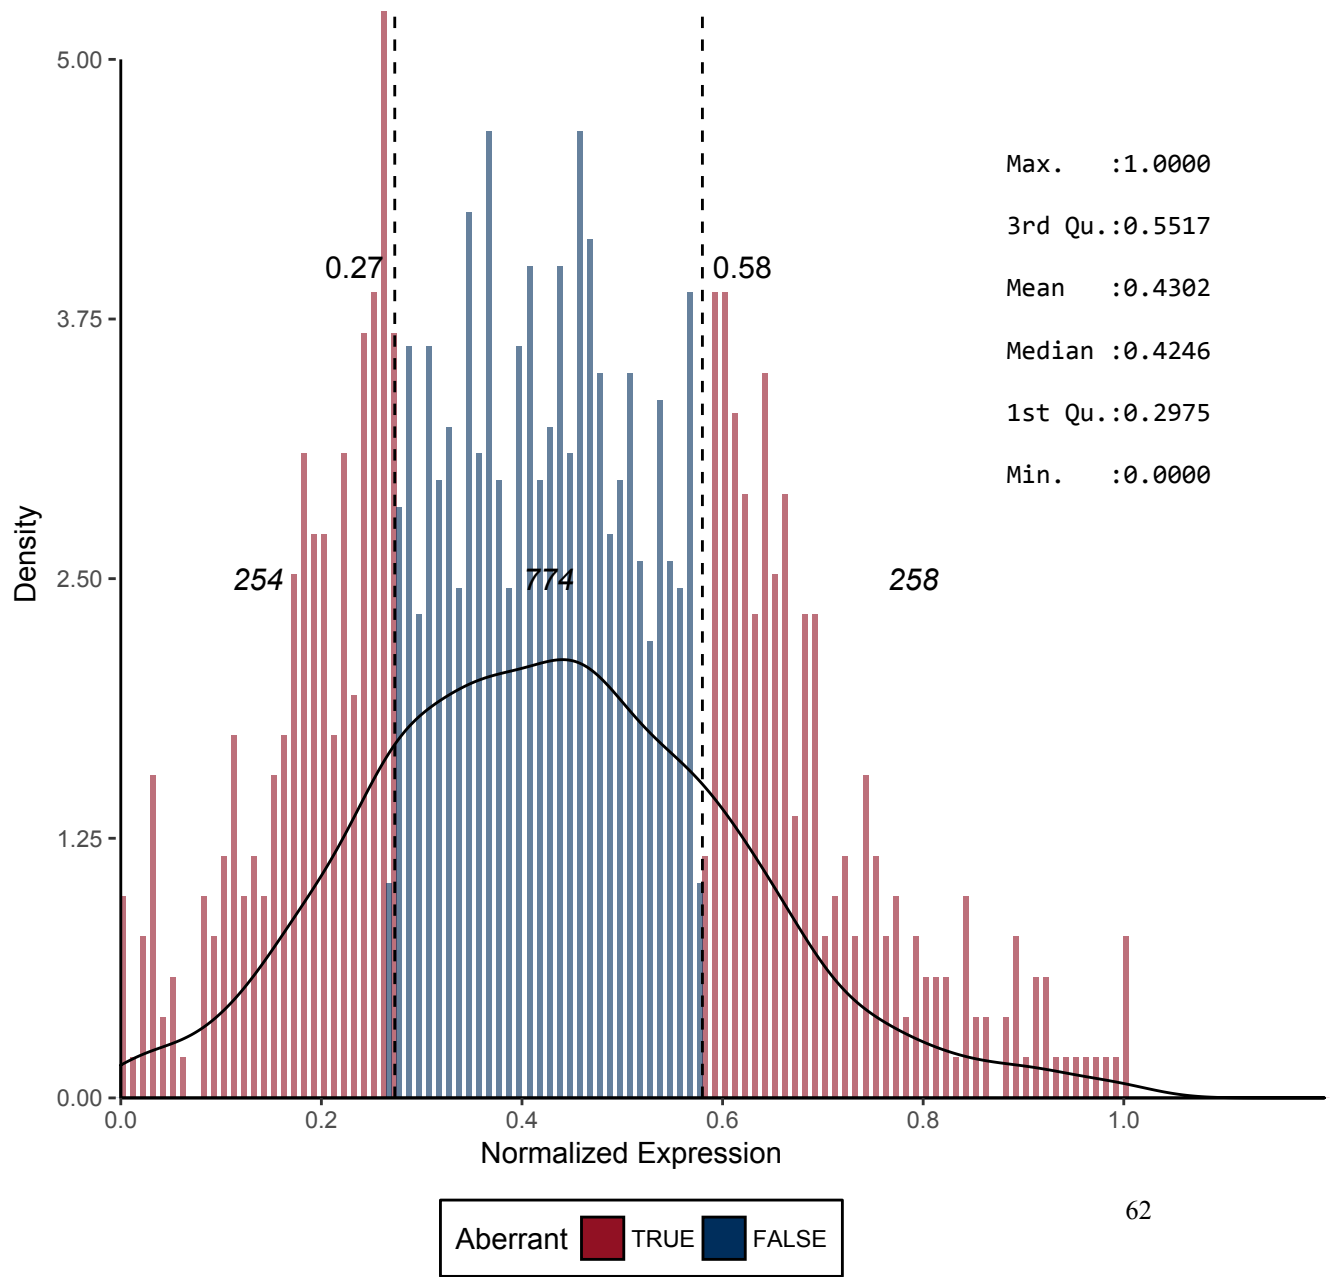

Figure 46 - CD42A

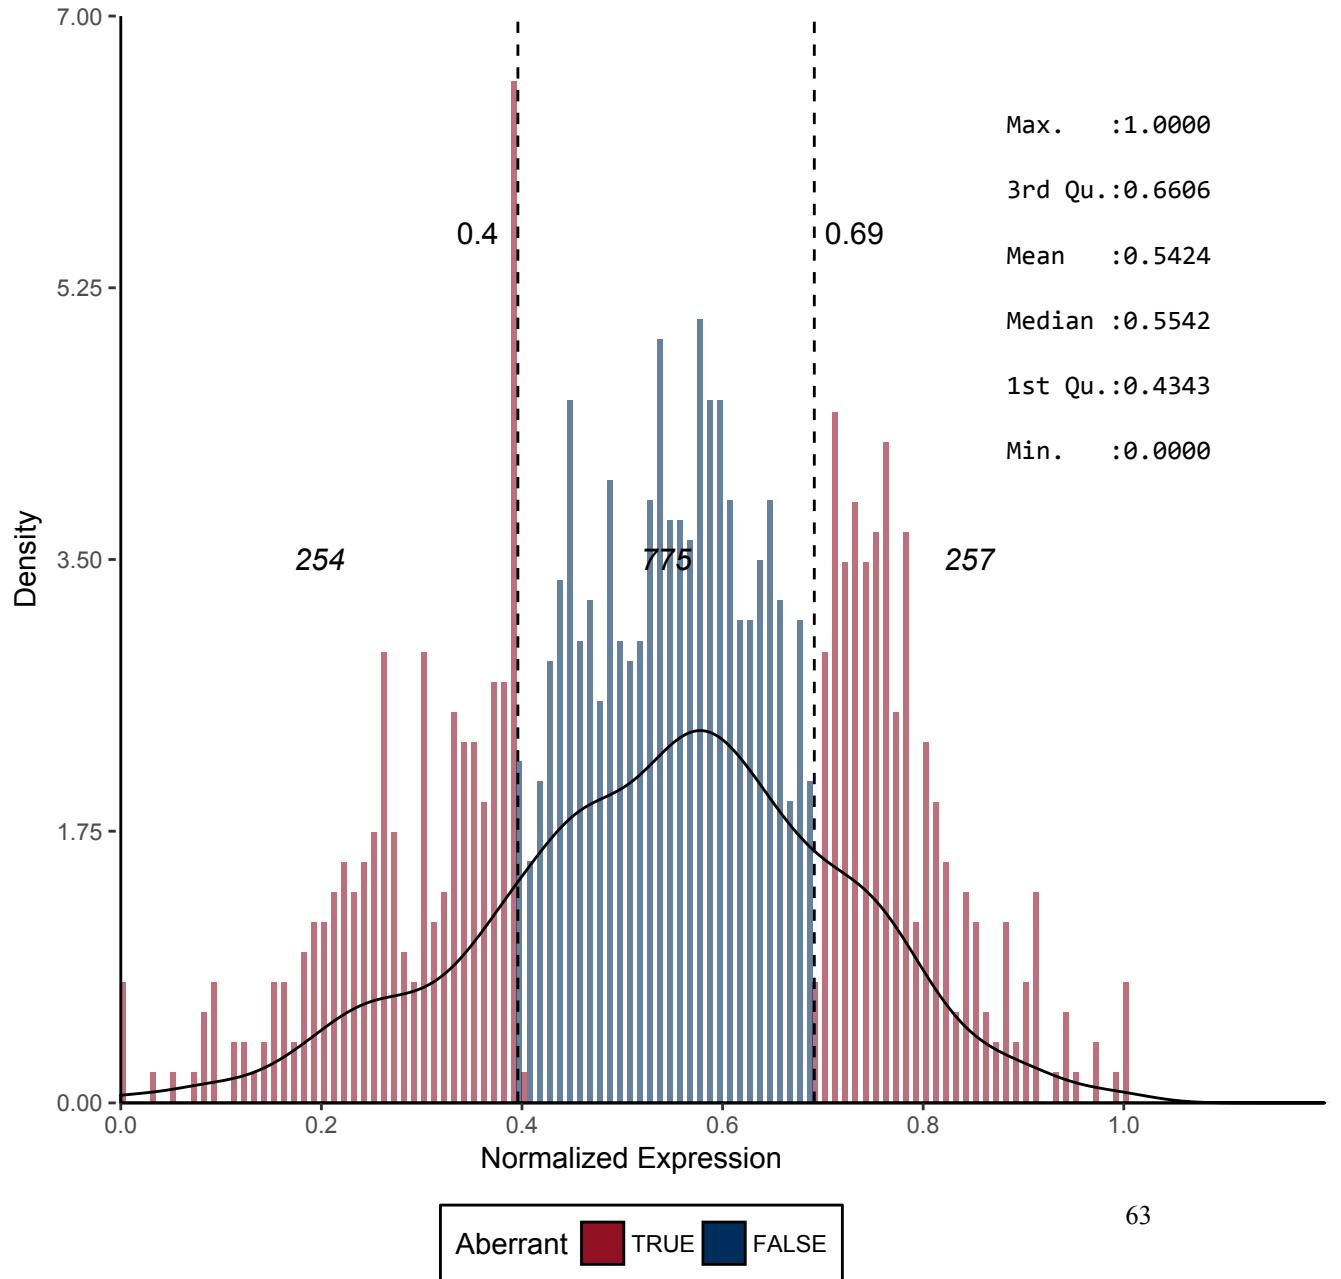

Figure 47 - CD42B

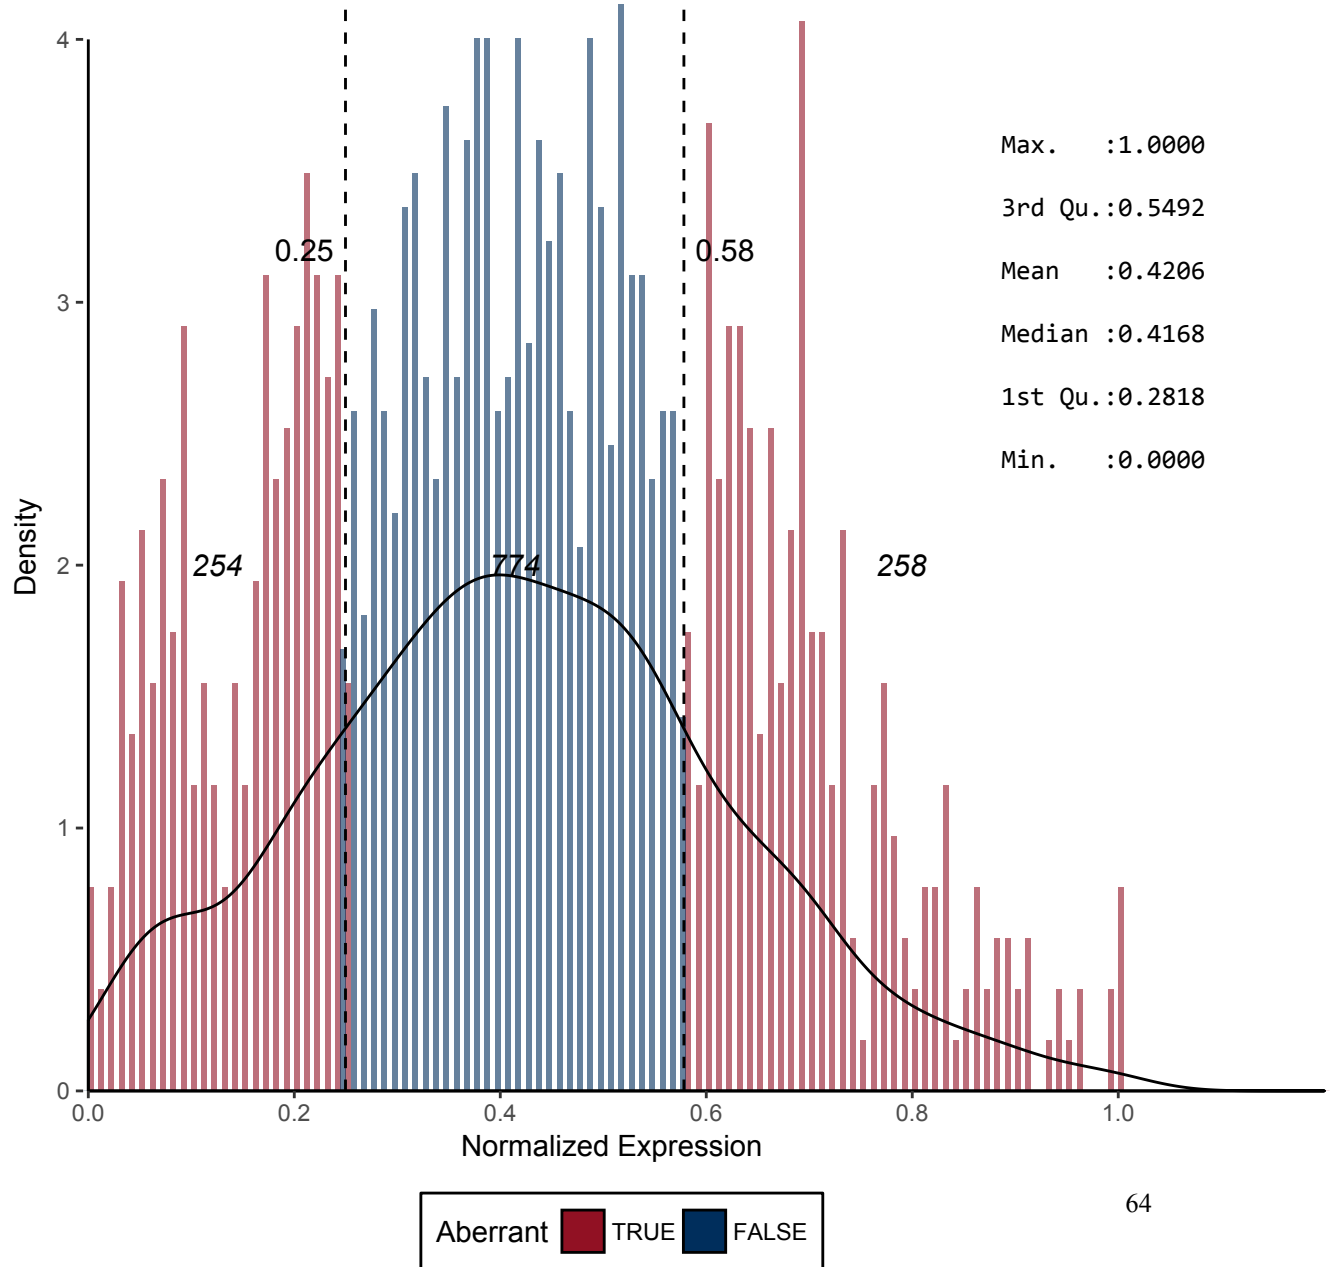



Figure 48 - CD43

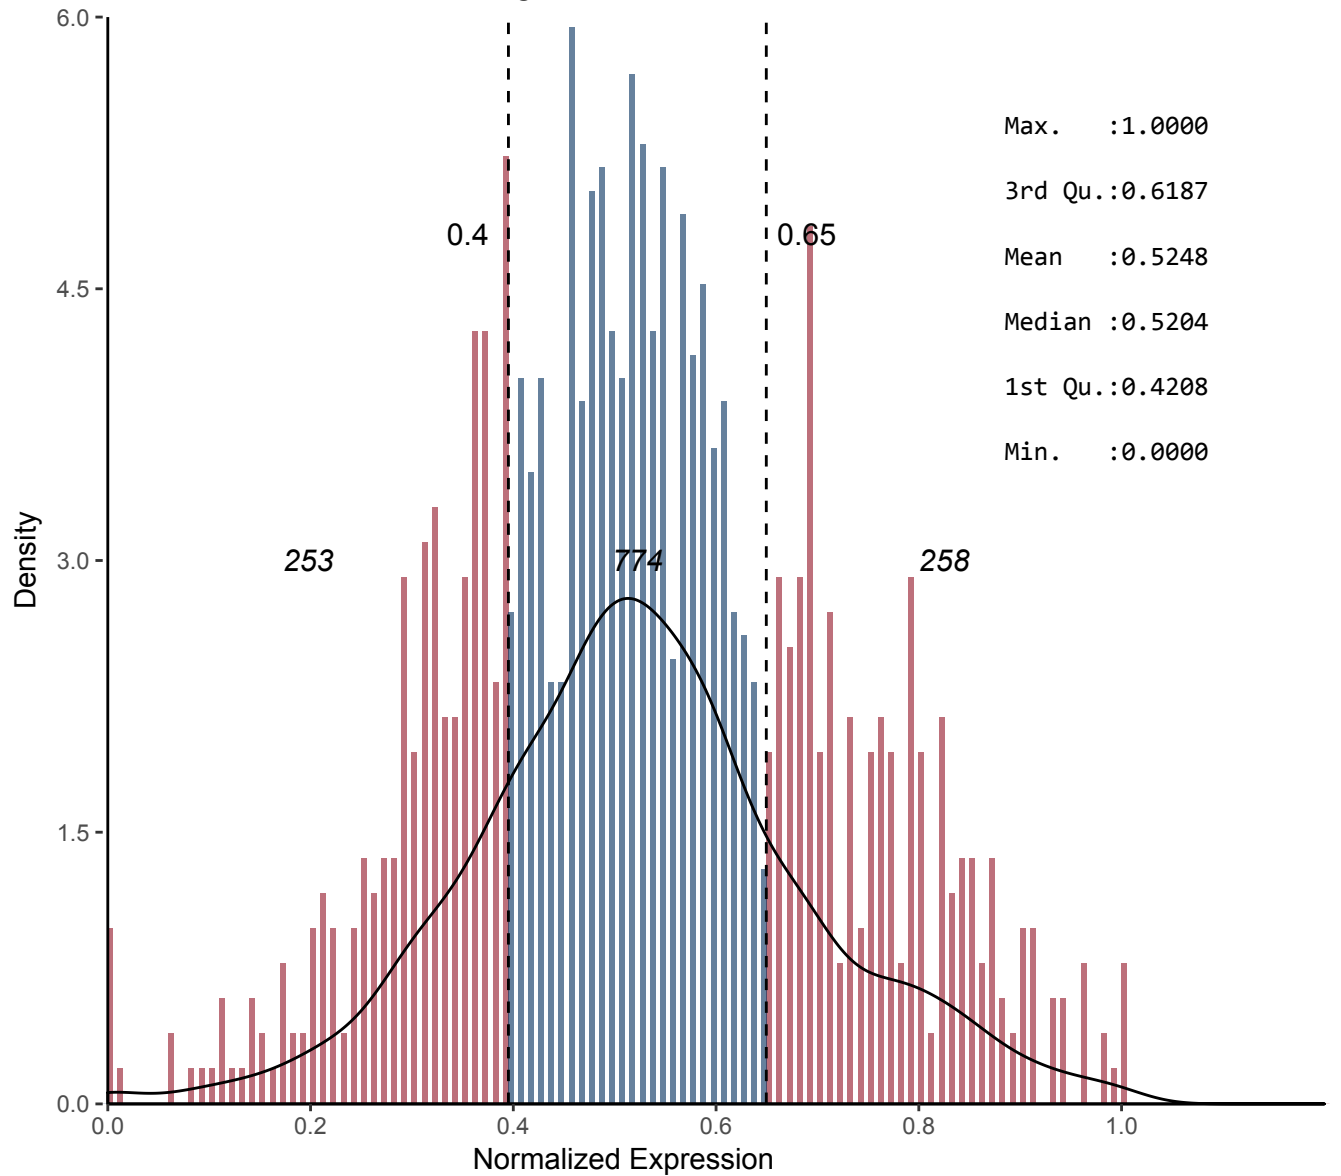

Aberrant TRUE FALSE

Figure 49 - CD44

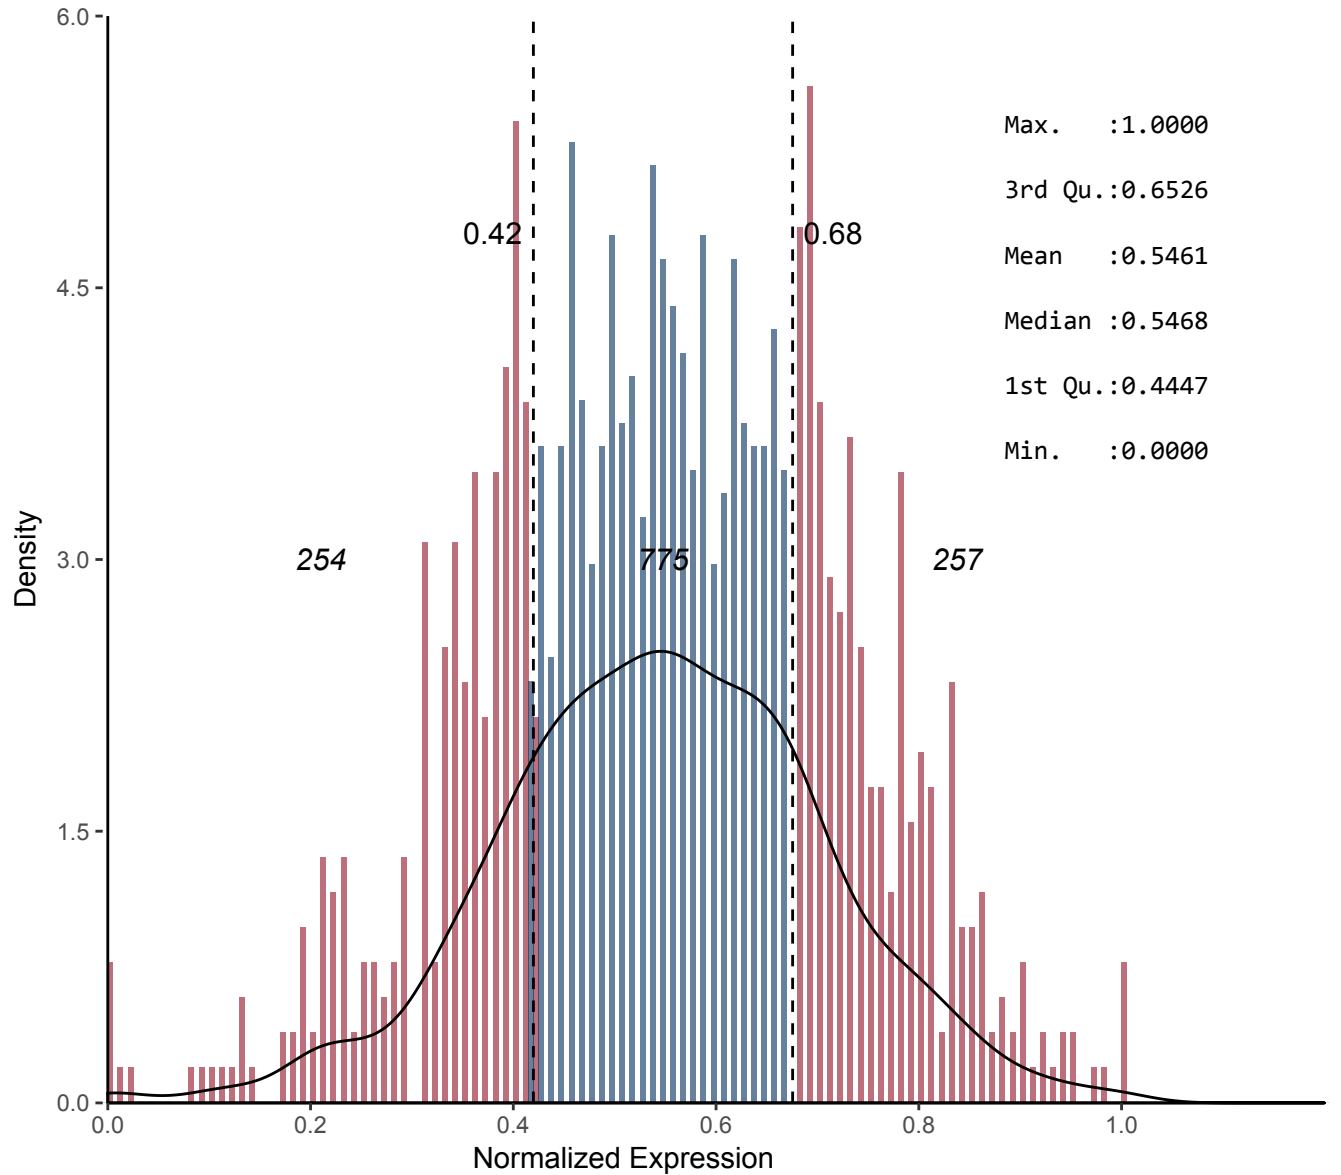

Aberrant TRUE FALSE

Figure 50 - CD45

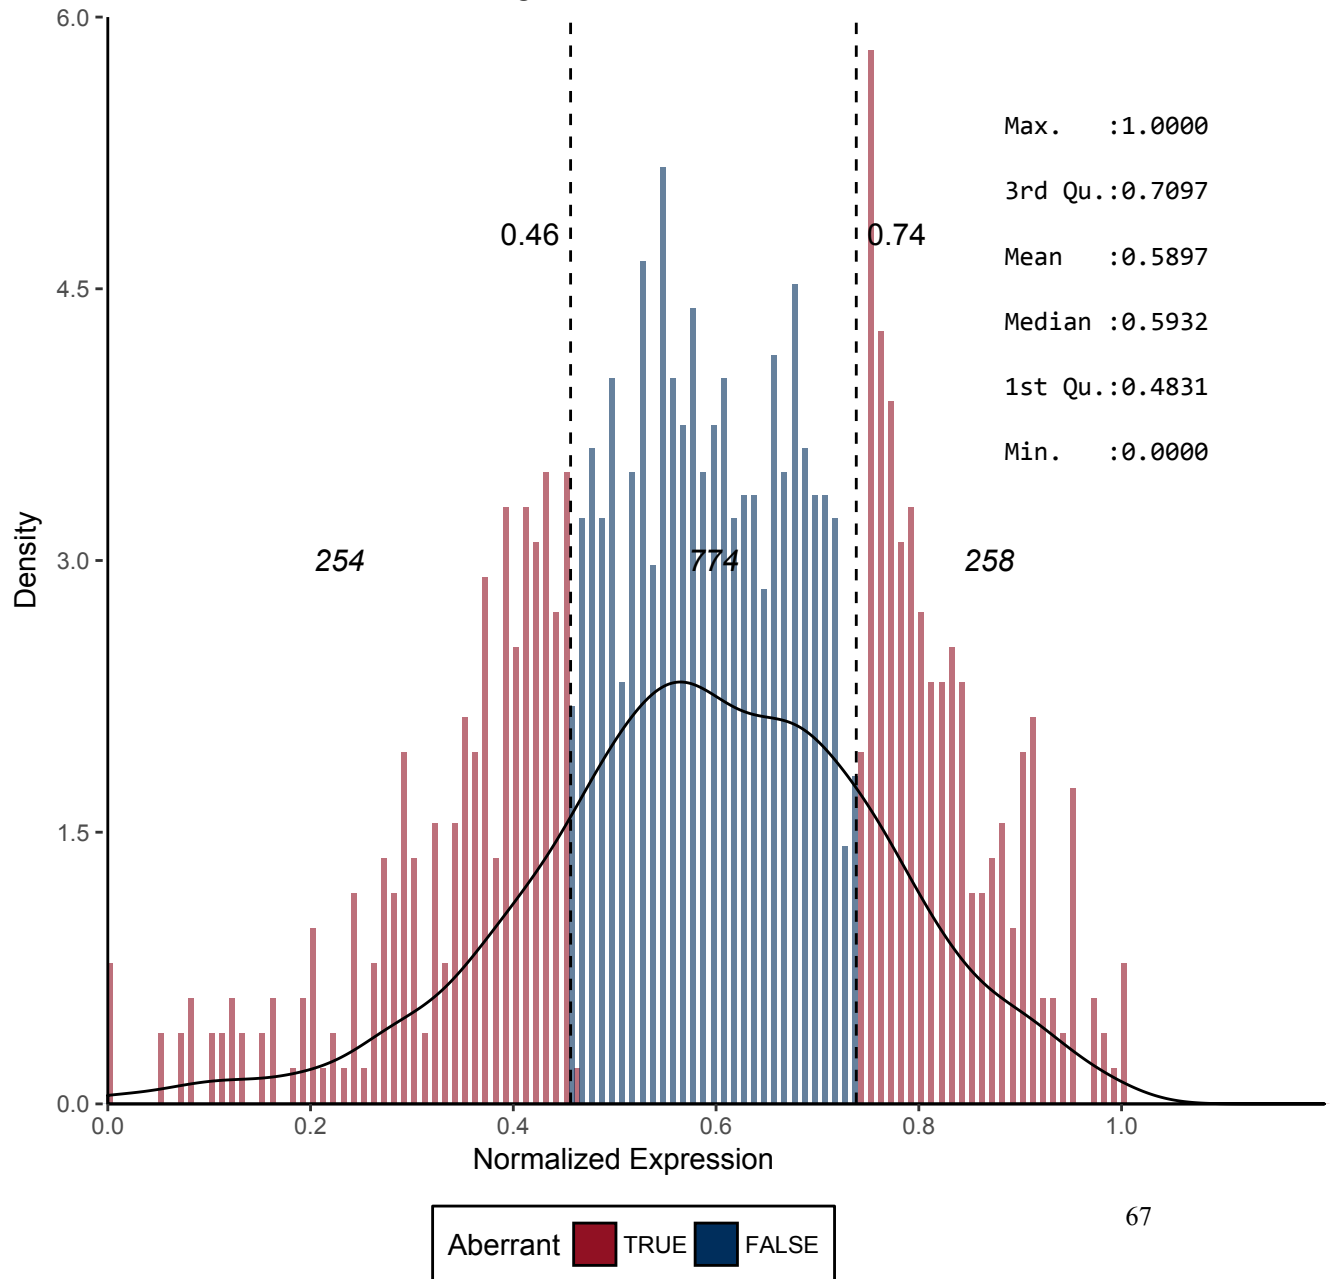

Figure 51 - CD46

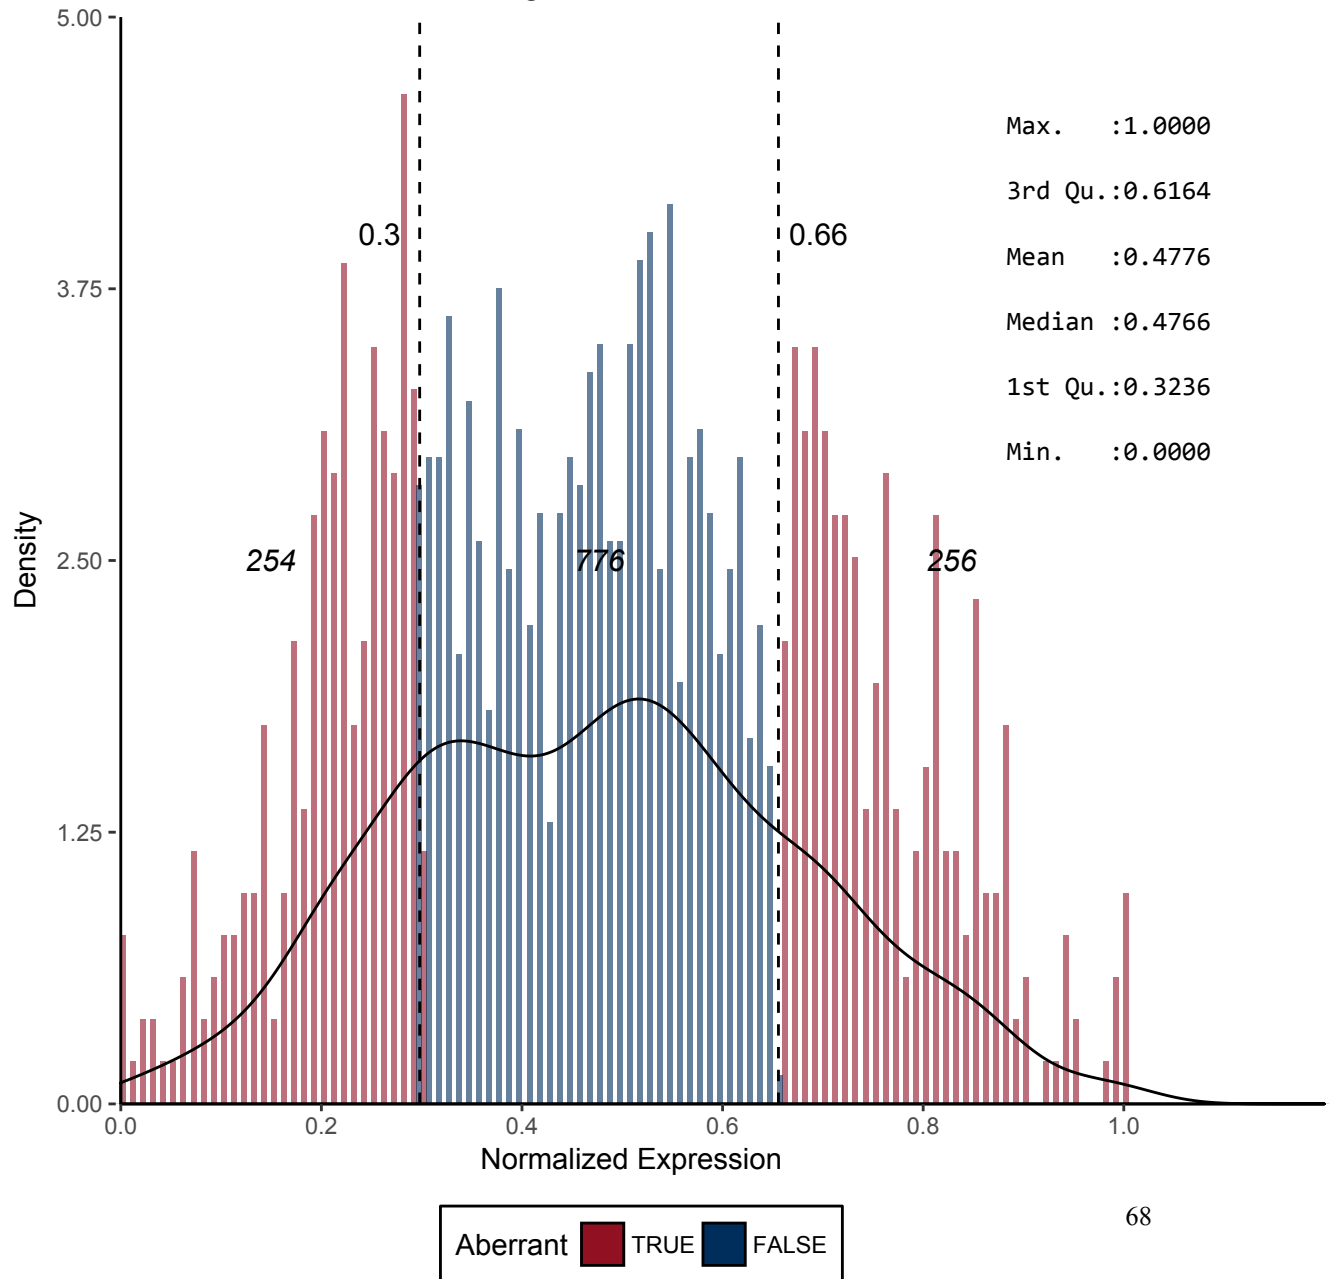

Figure 52 - CD47

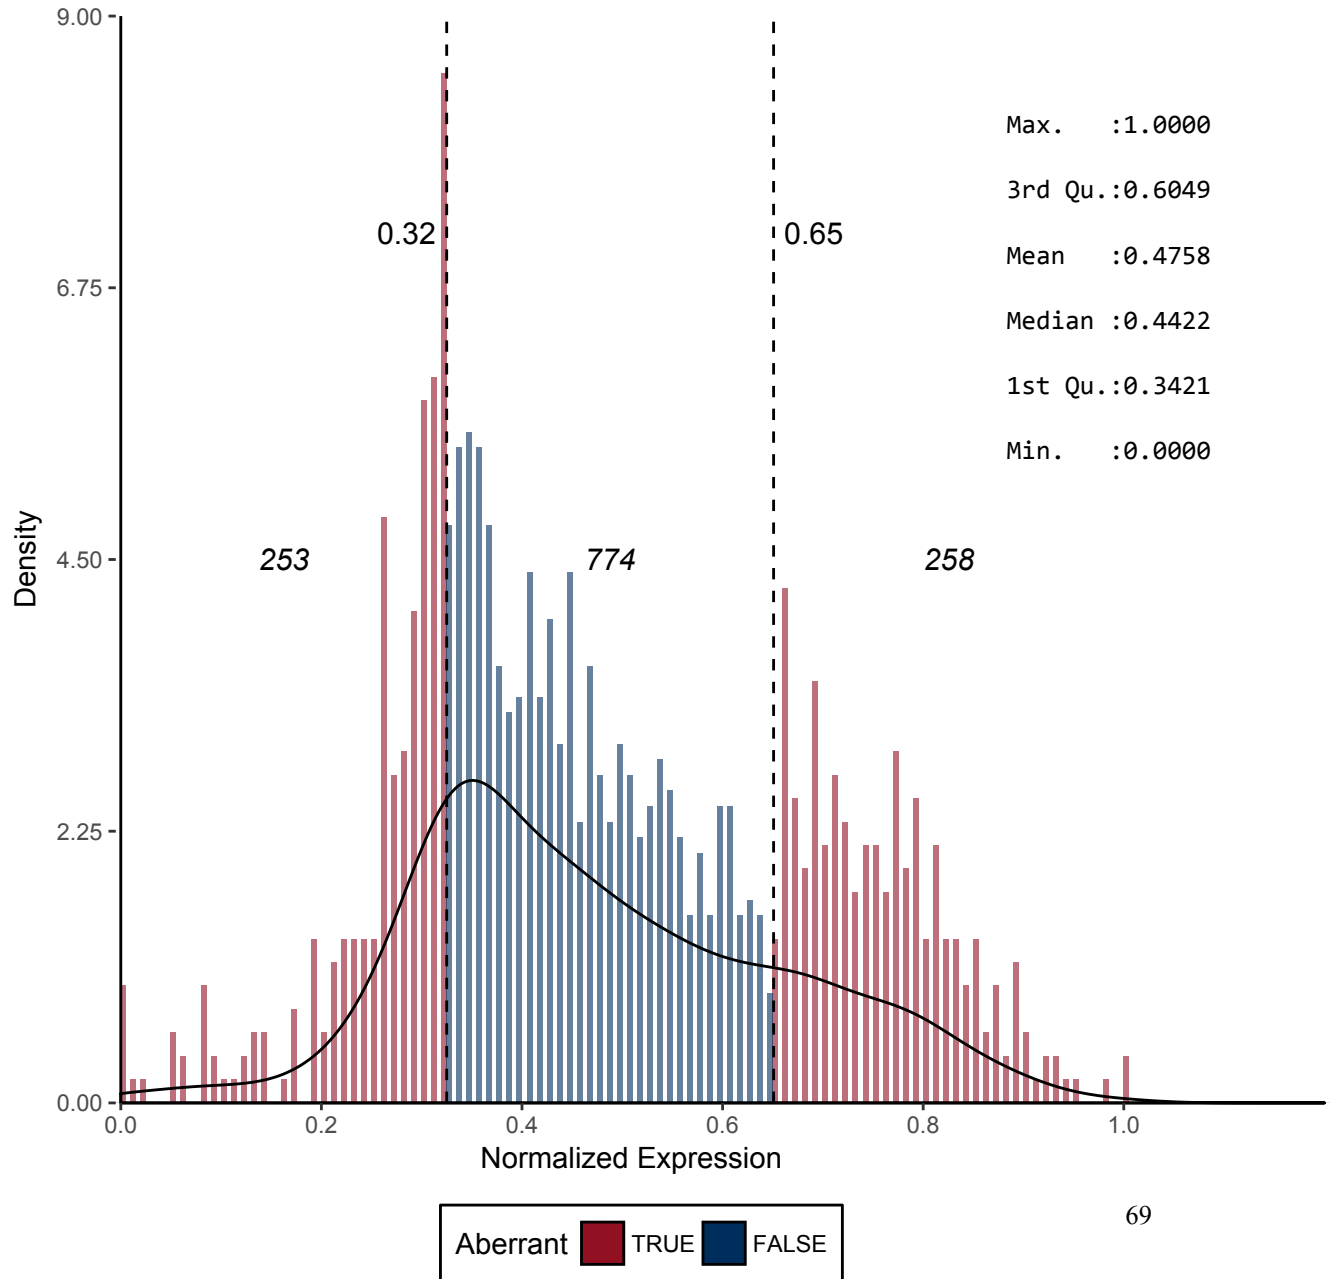

Figure 53 - CD48

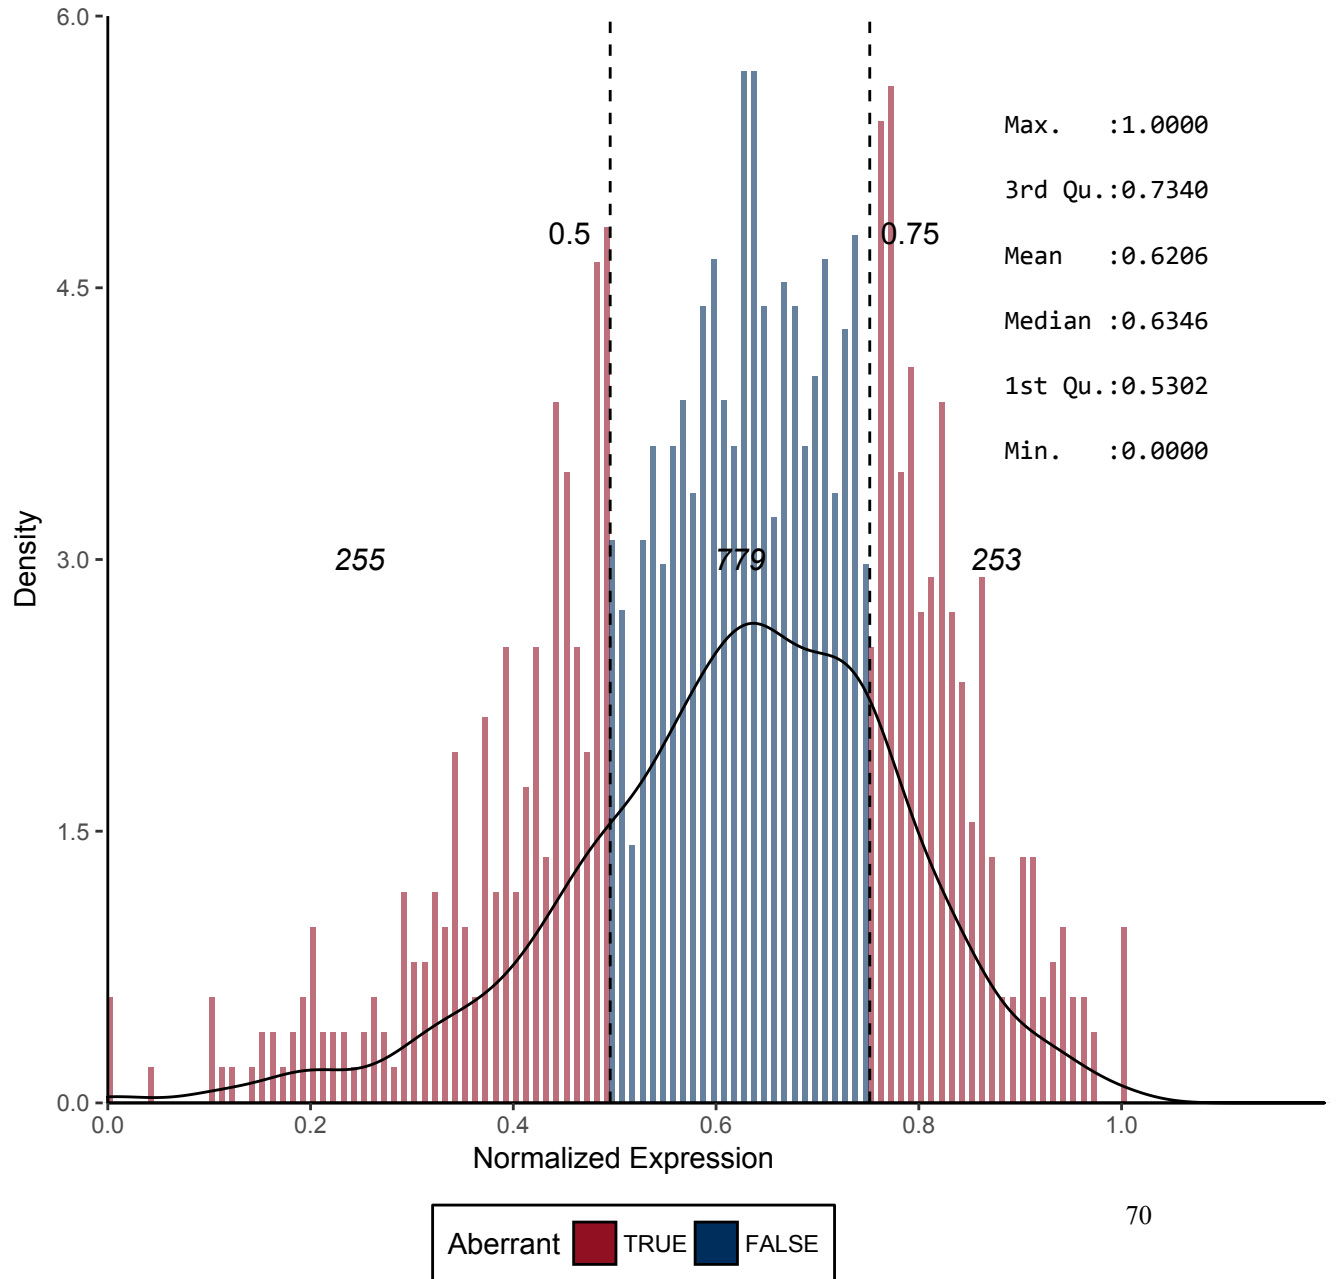

Figure 54 - CD49B\*

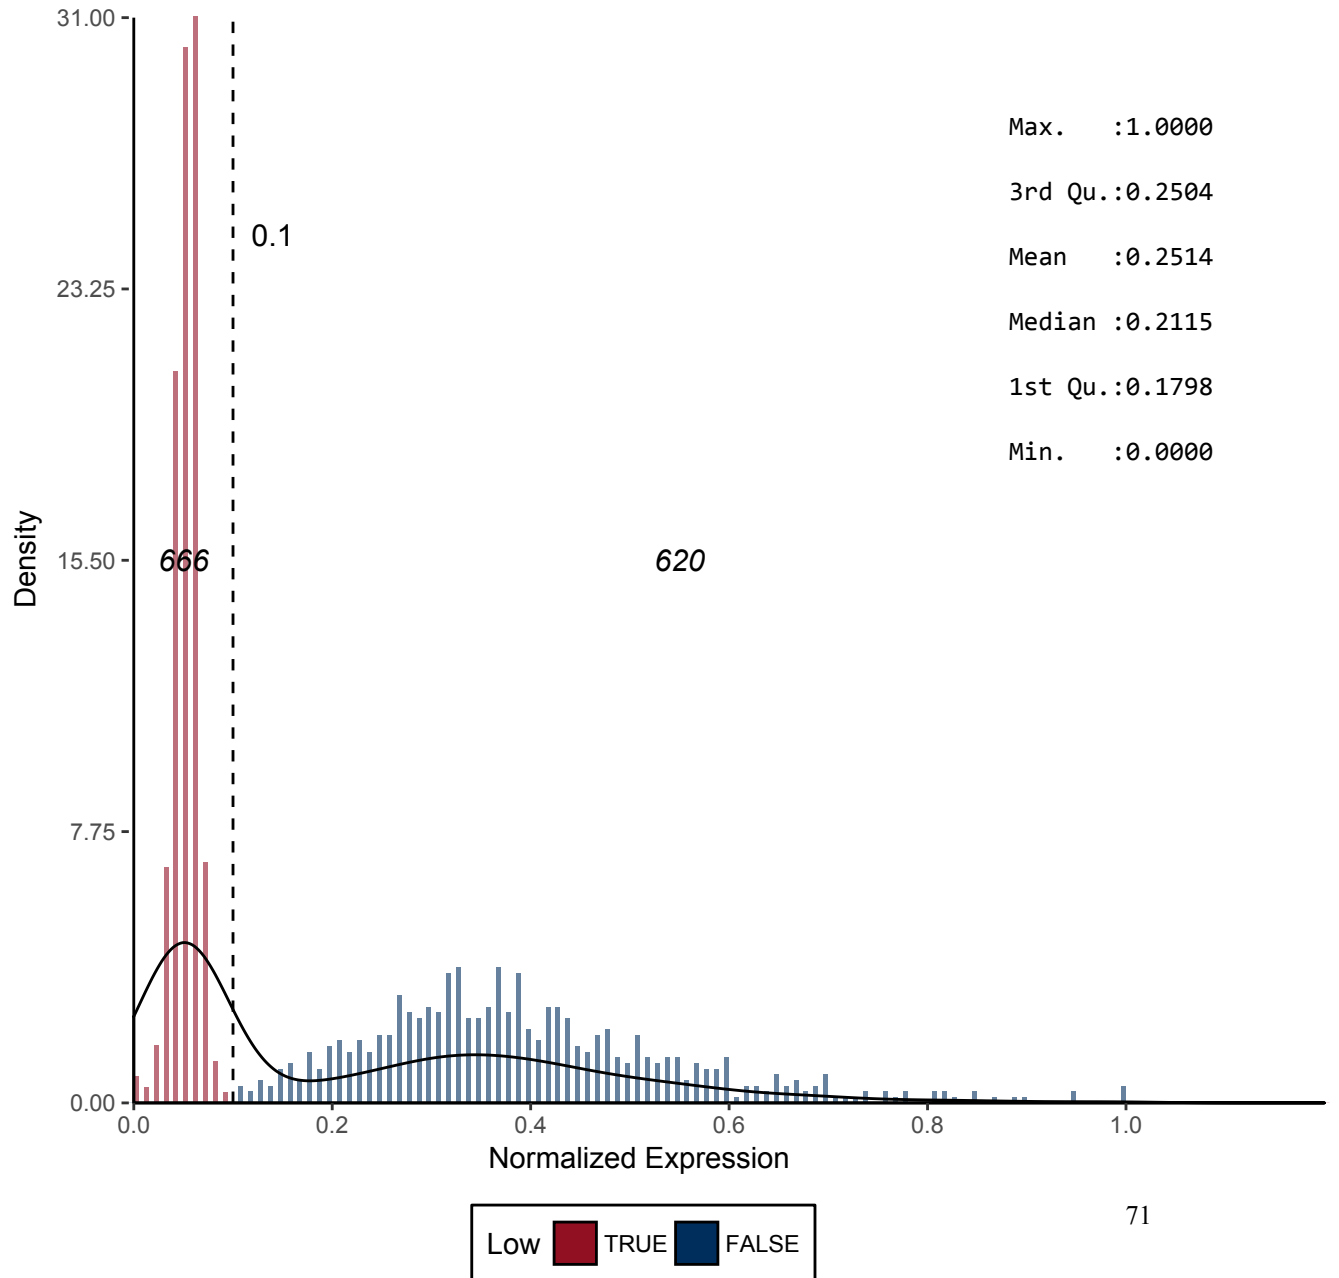

Figure 55 - CD49C\*

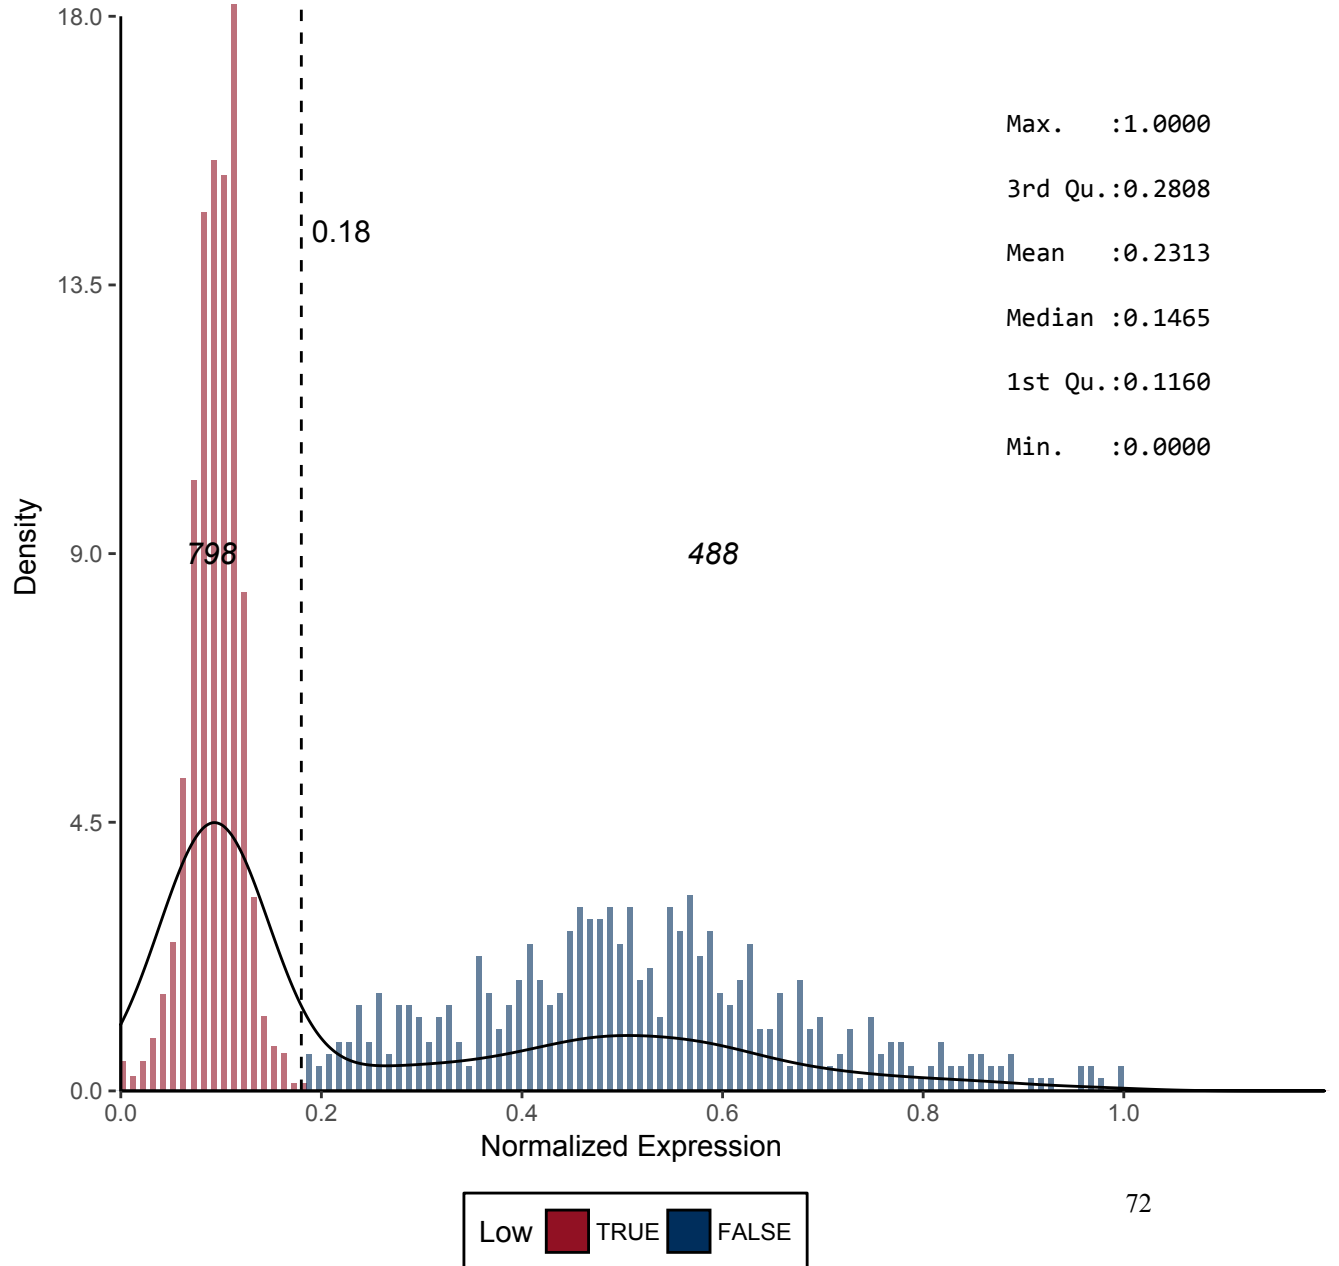



Figure 56 - CD49D

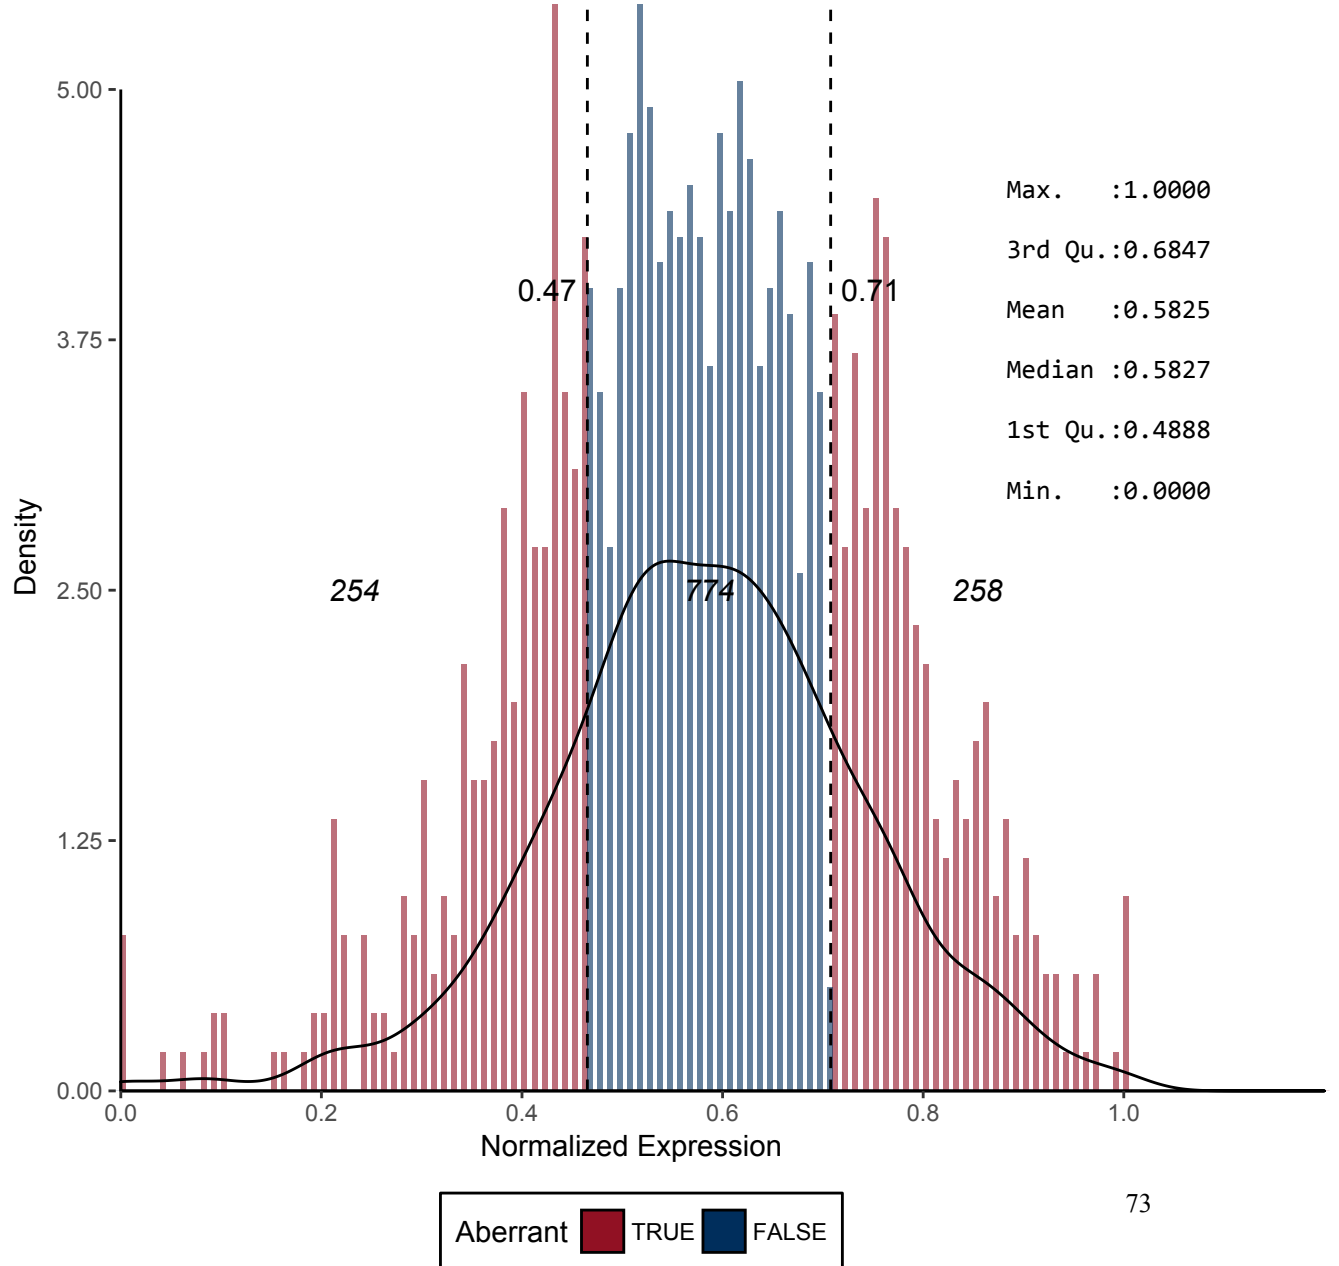

Figure 57 - CD49E

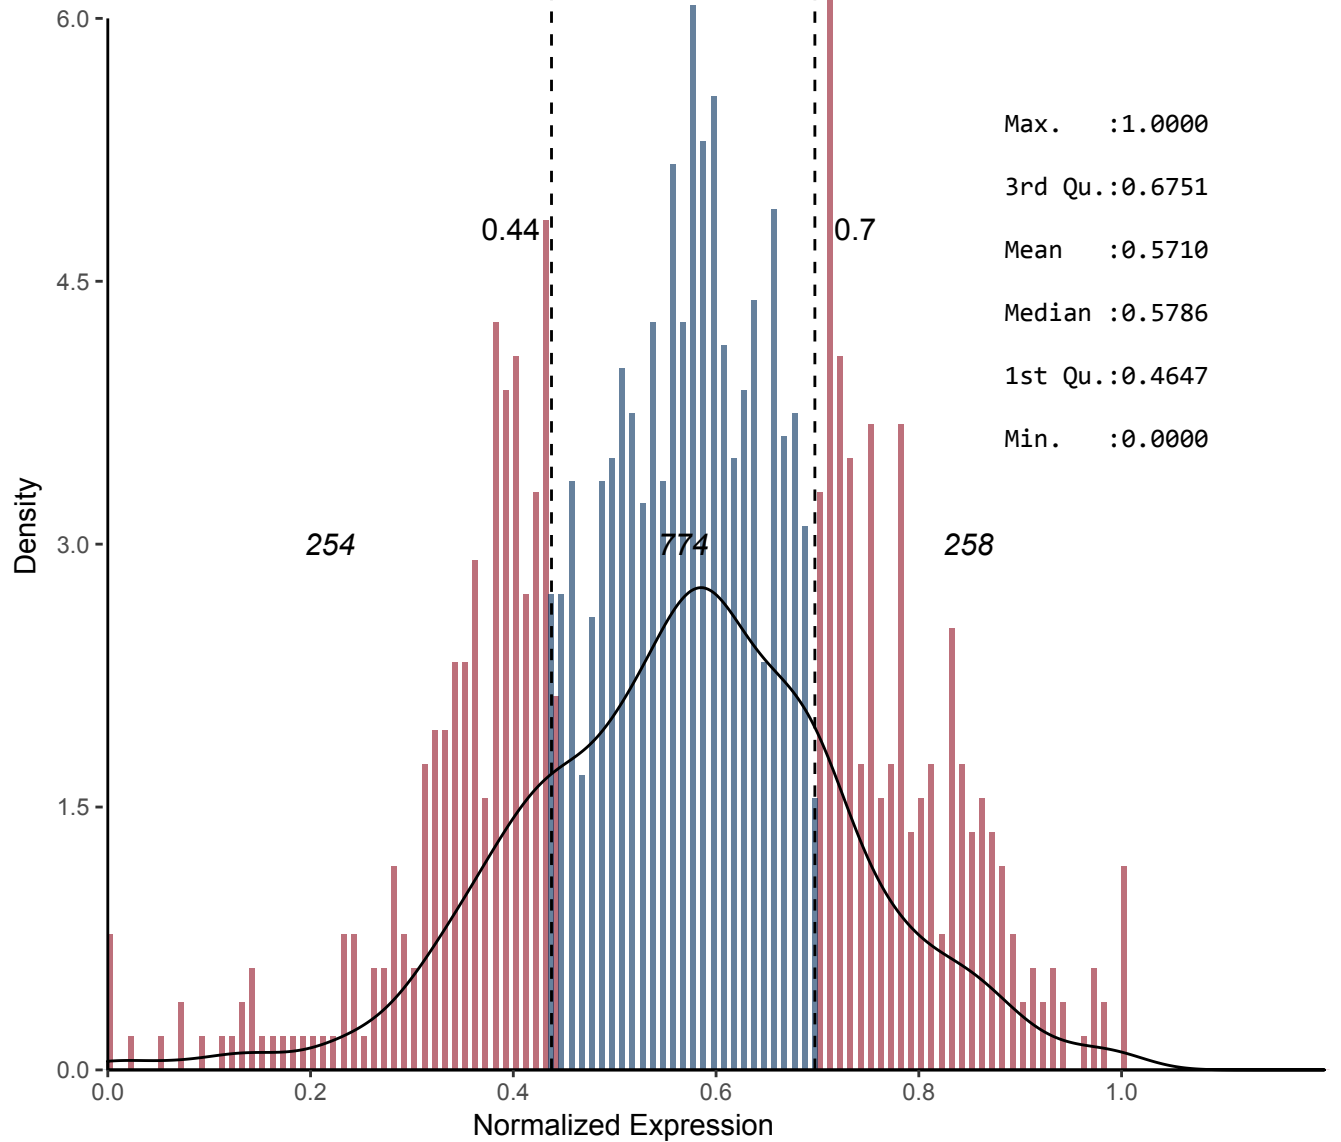

Aberrant TRUE FALSE

Figure 58 - CD49F

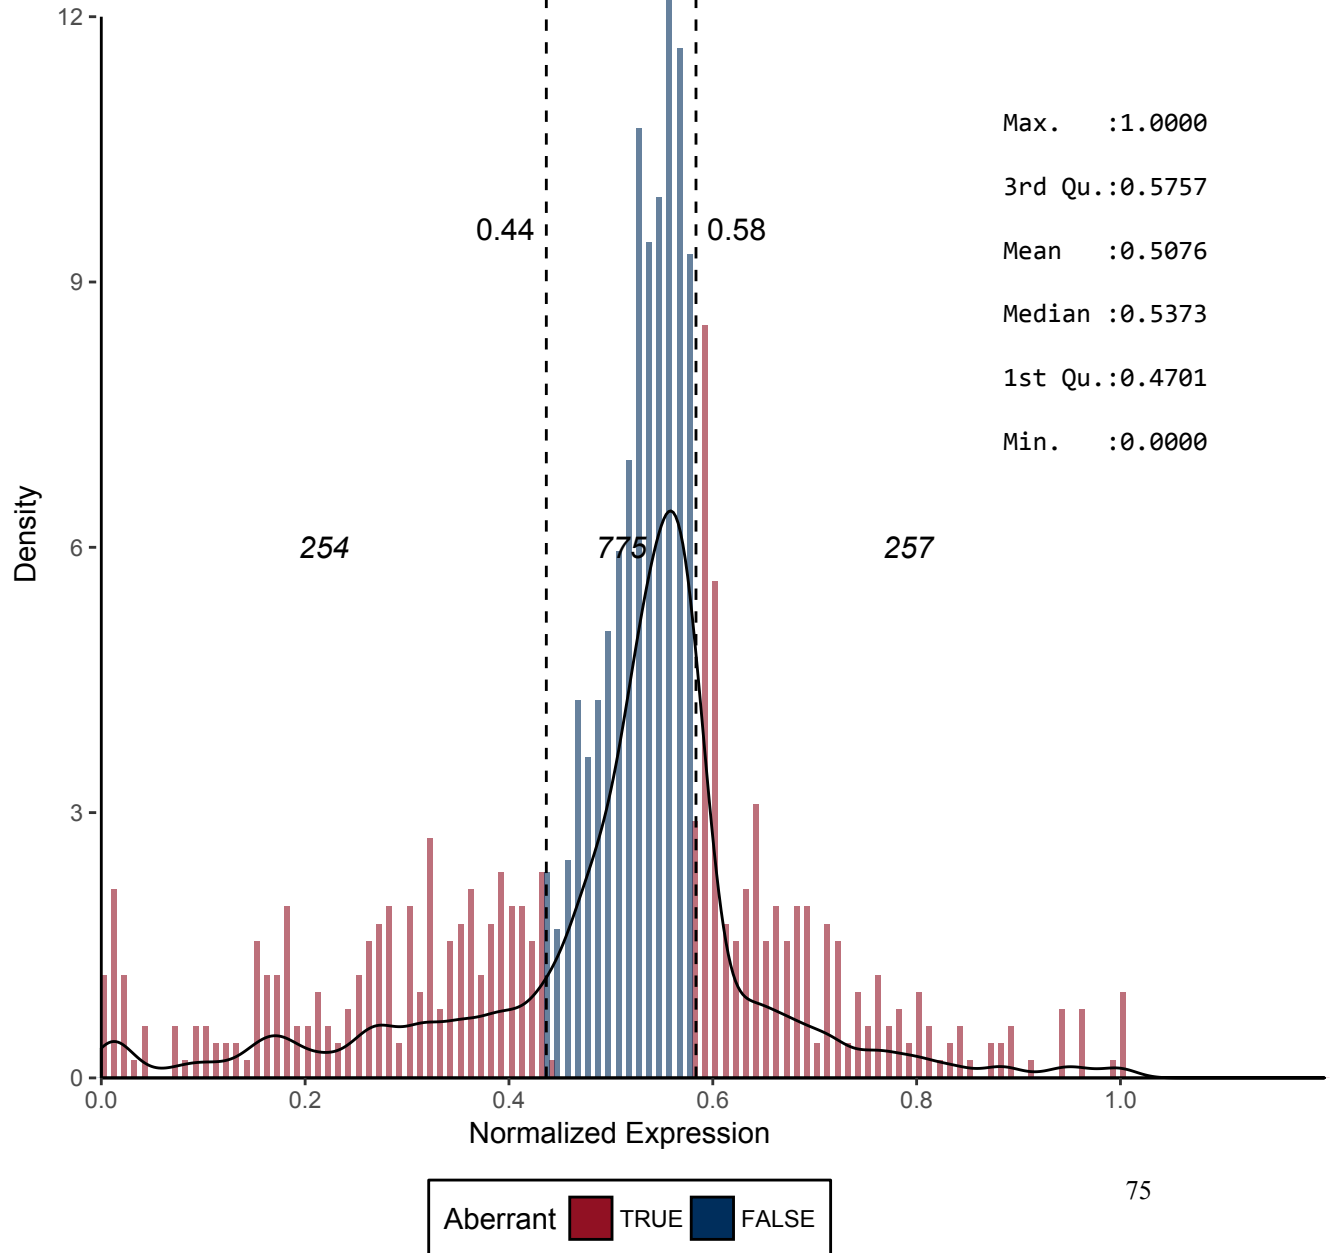

Figure 59 - CD50

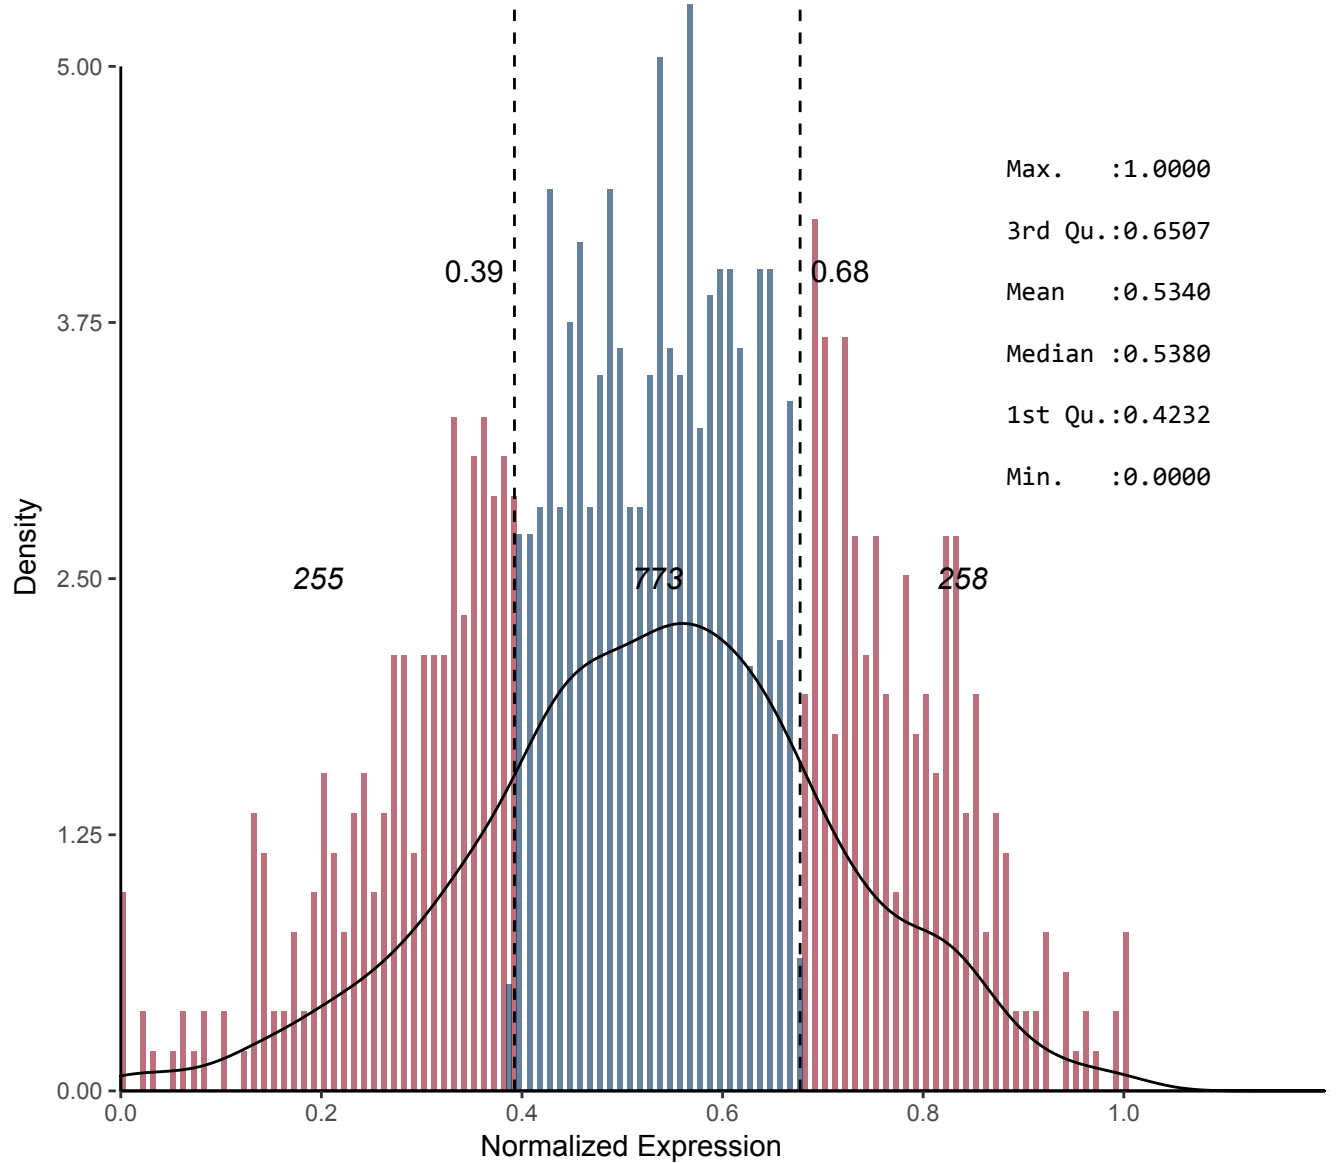

Aberrant TRUE FALSE

Figure 60 - CD51

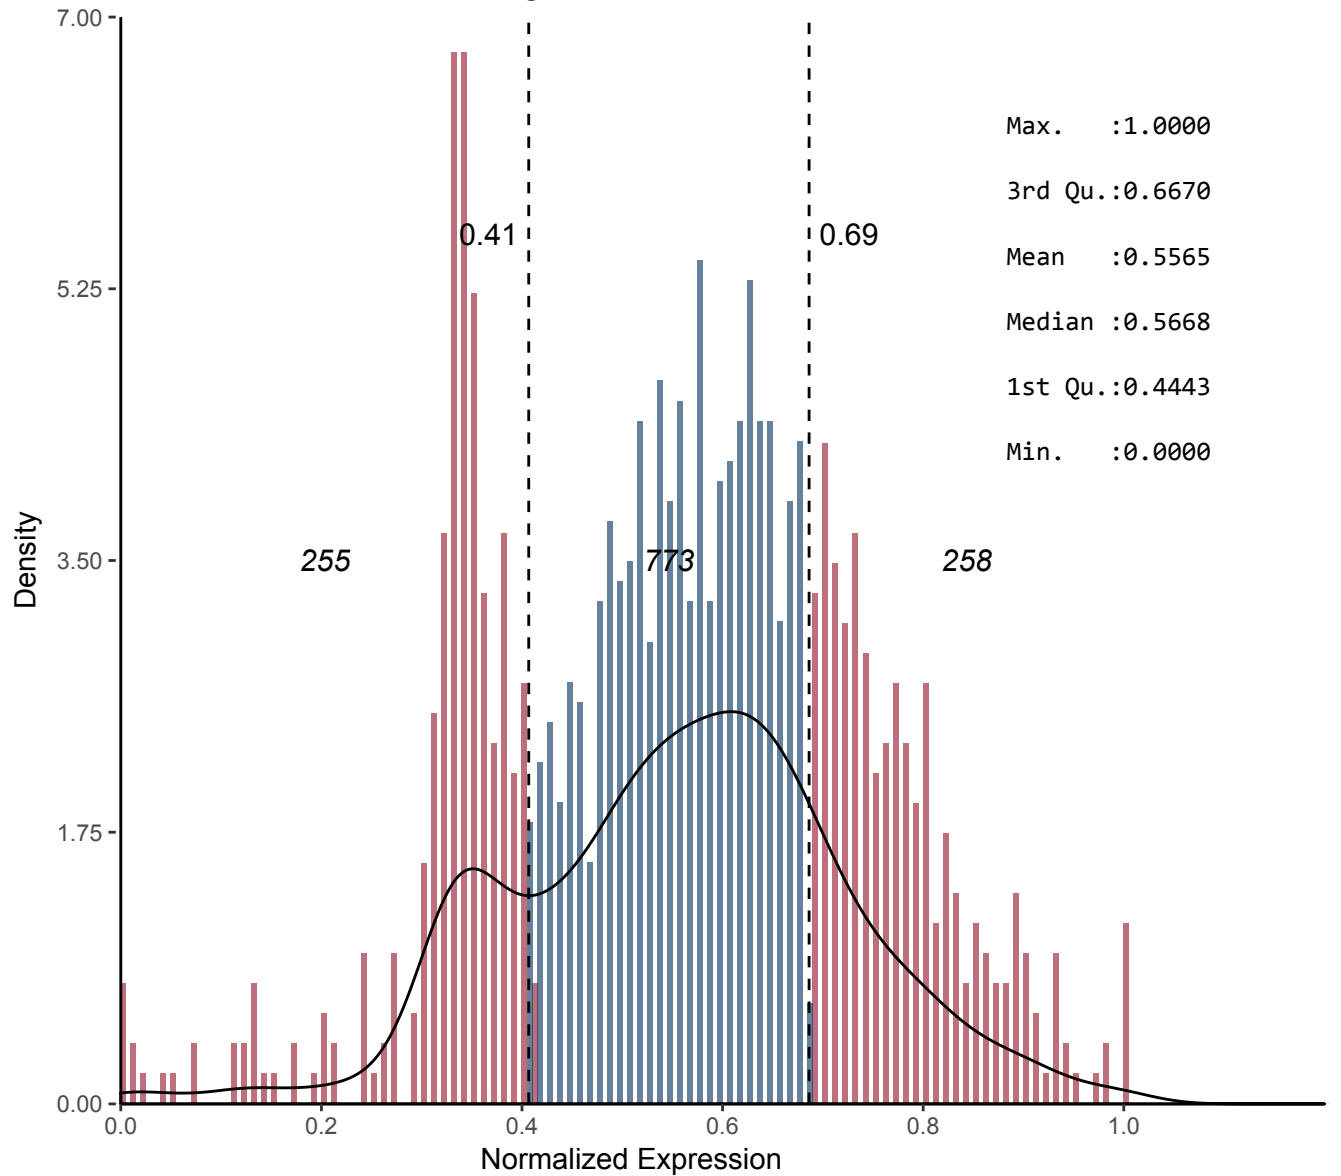

Figure 61 - CD52

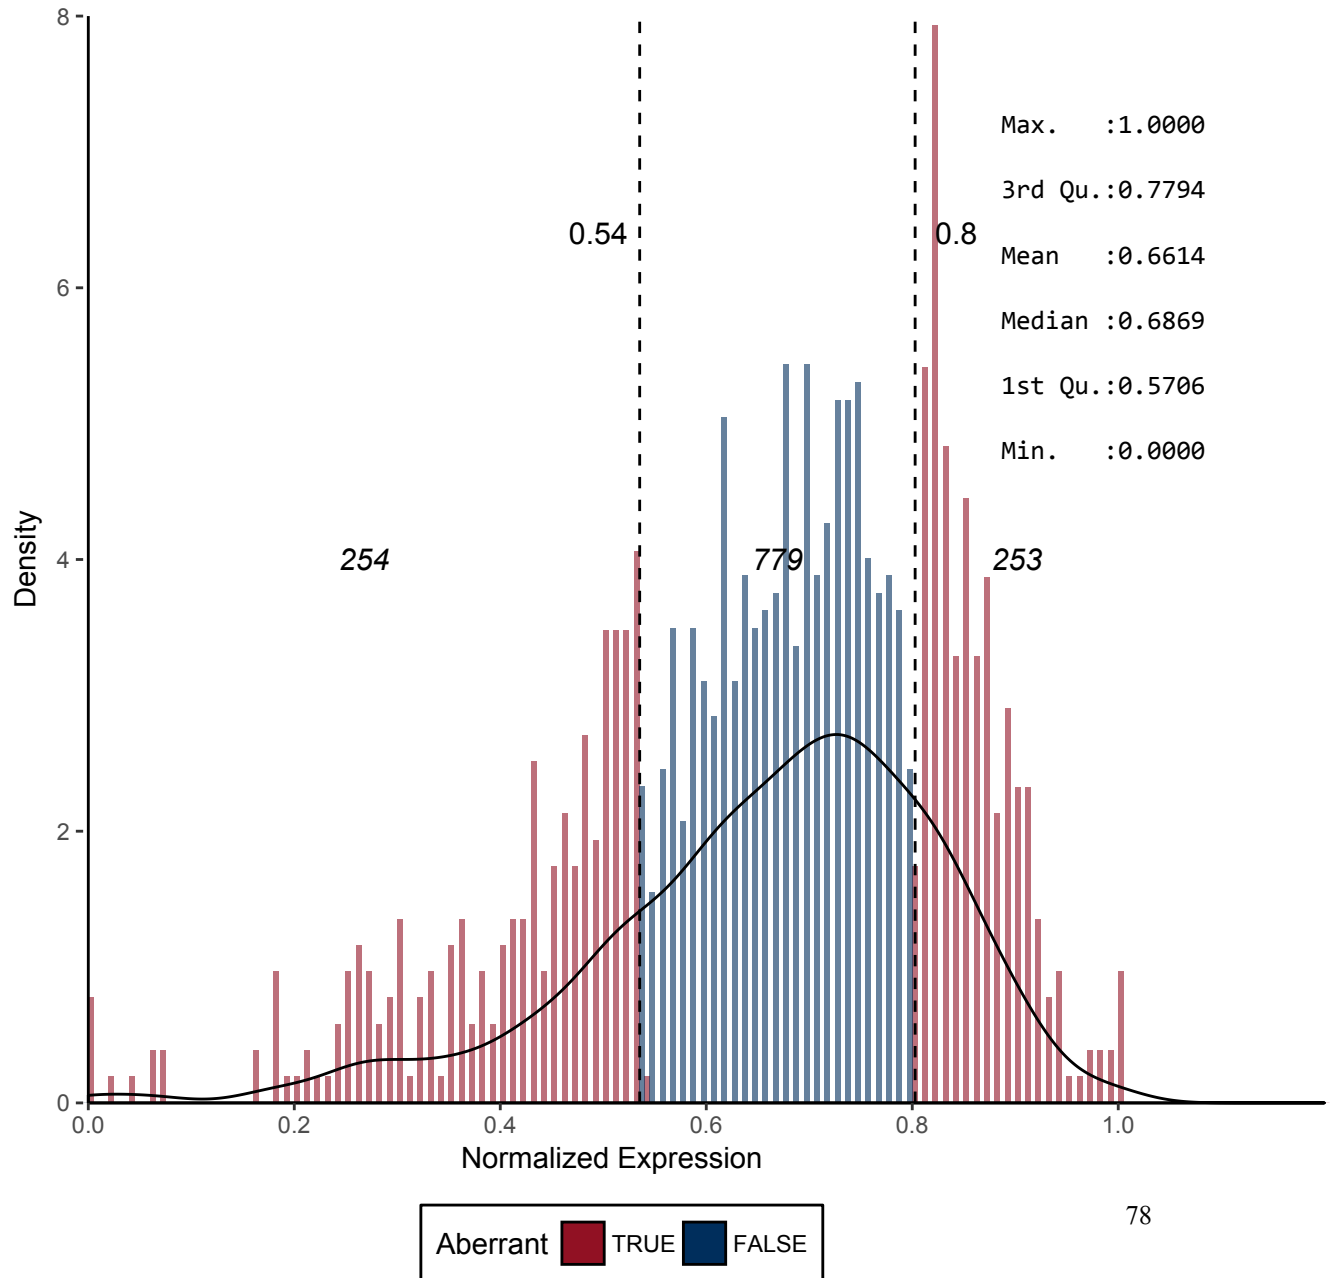

Figure 62 - CD53

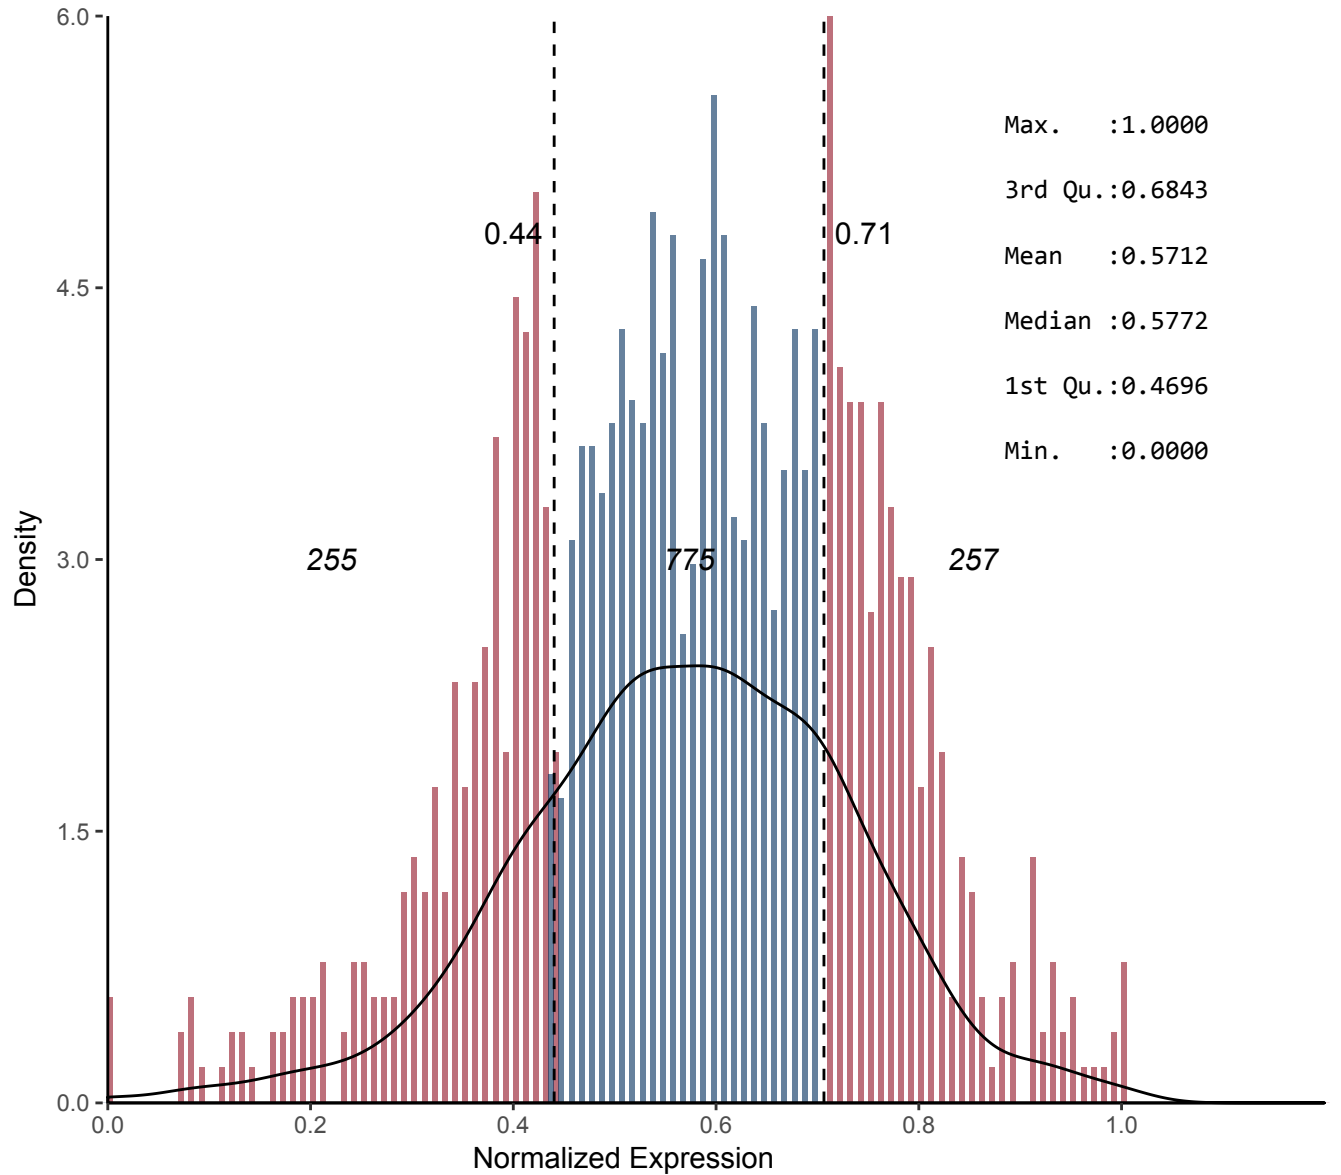

Aberrant TRUE FALSE

Figure 63 - CD54

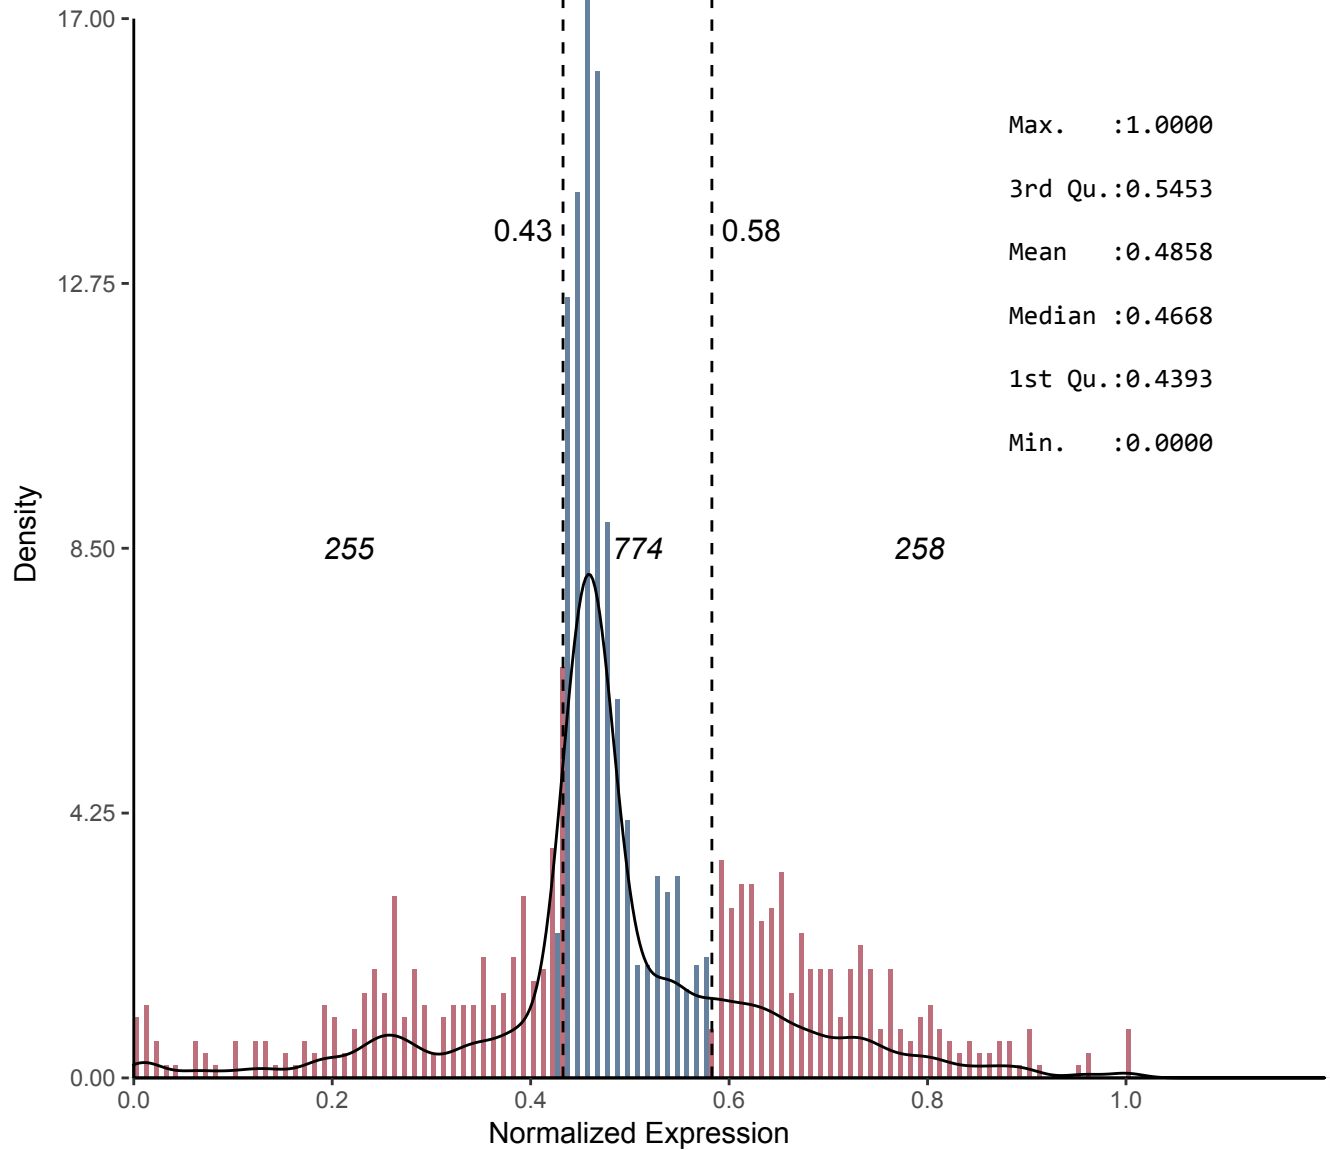

Aberrant ■ TRUE ■ FALSE



Figure 64 - CD55

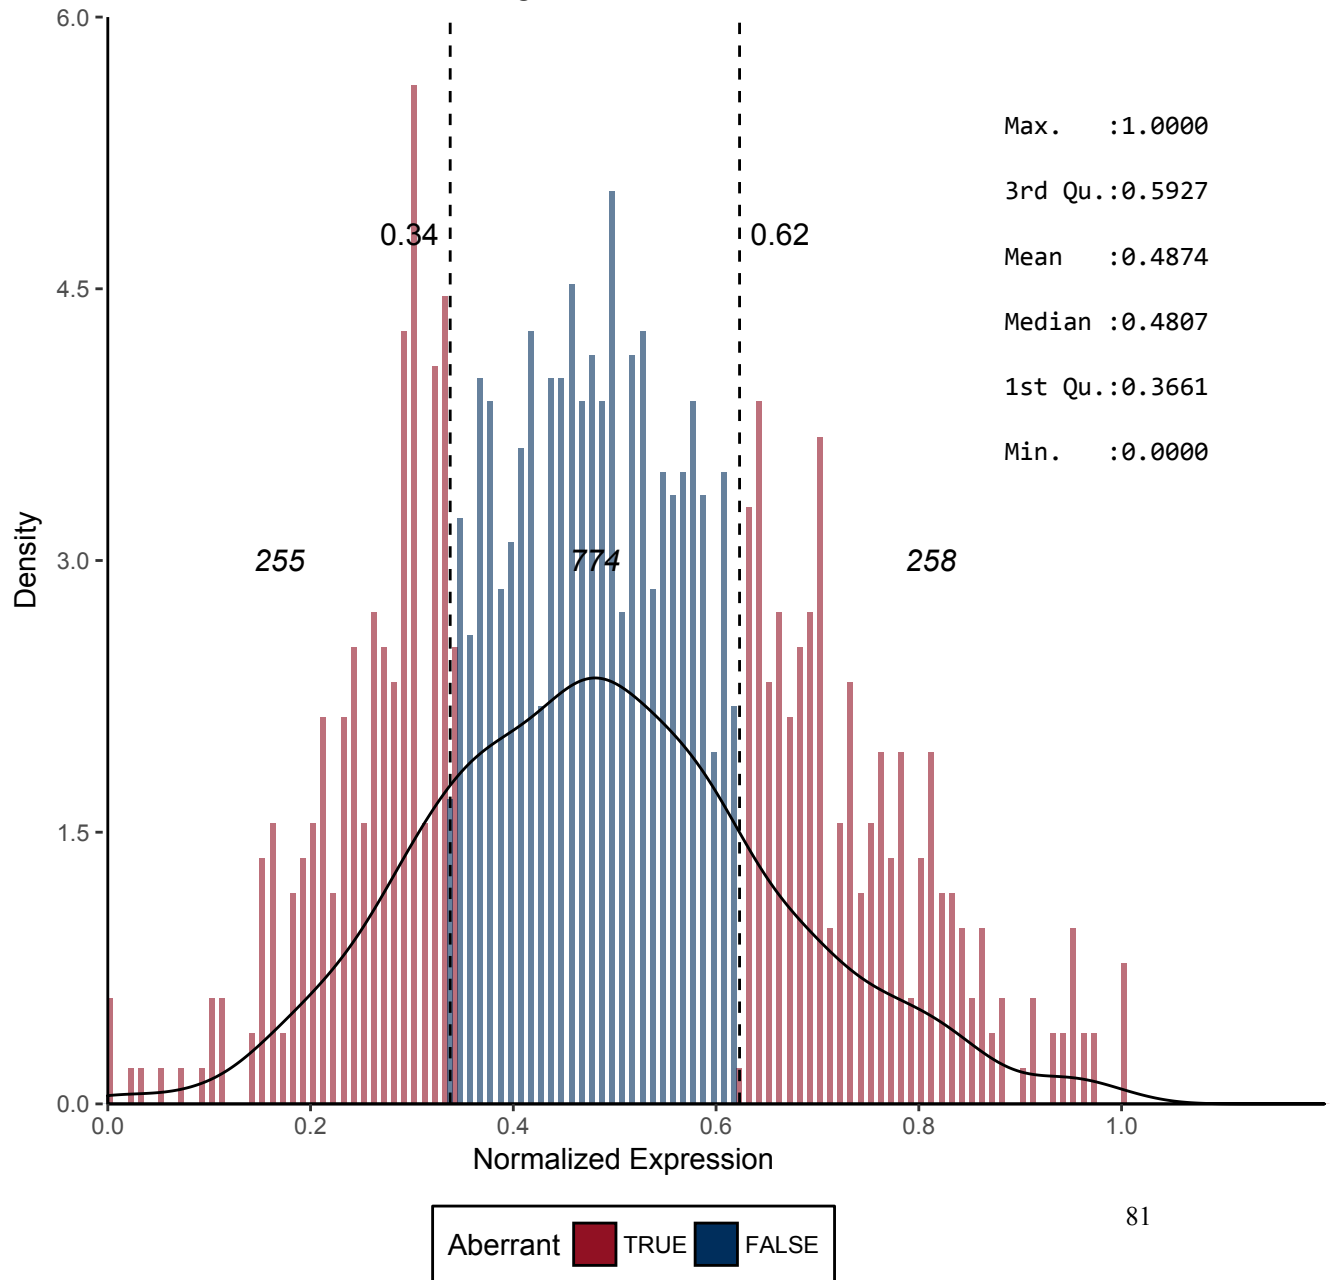

Figure 65 - CD56

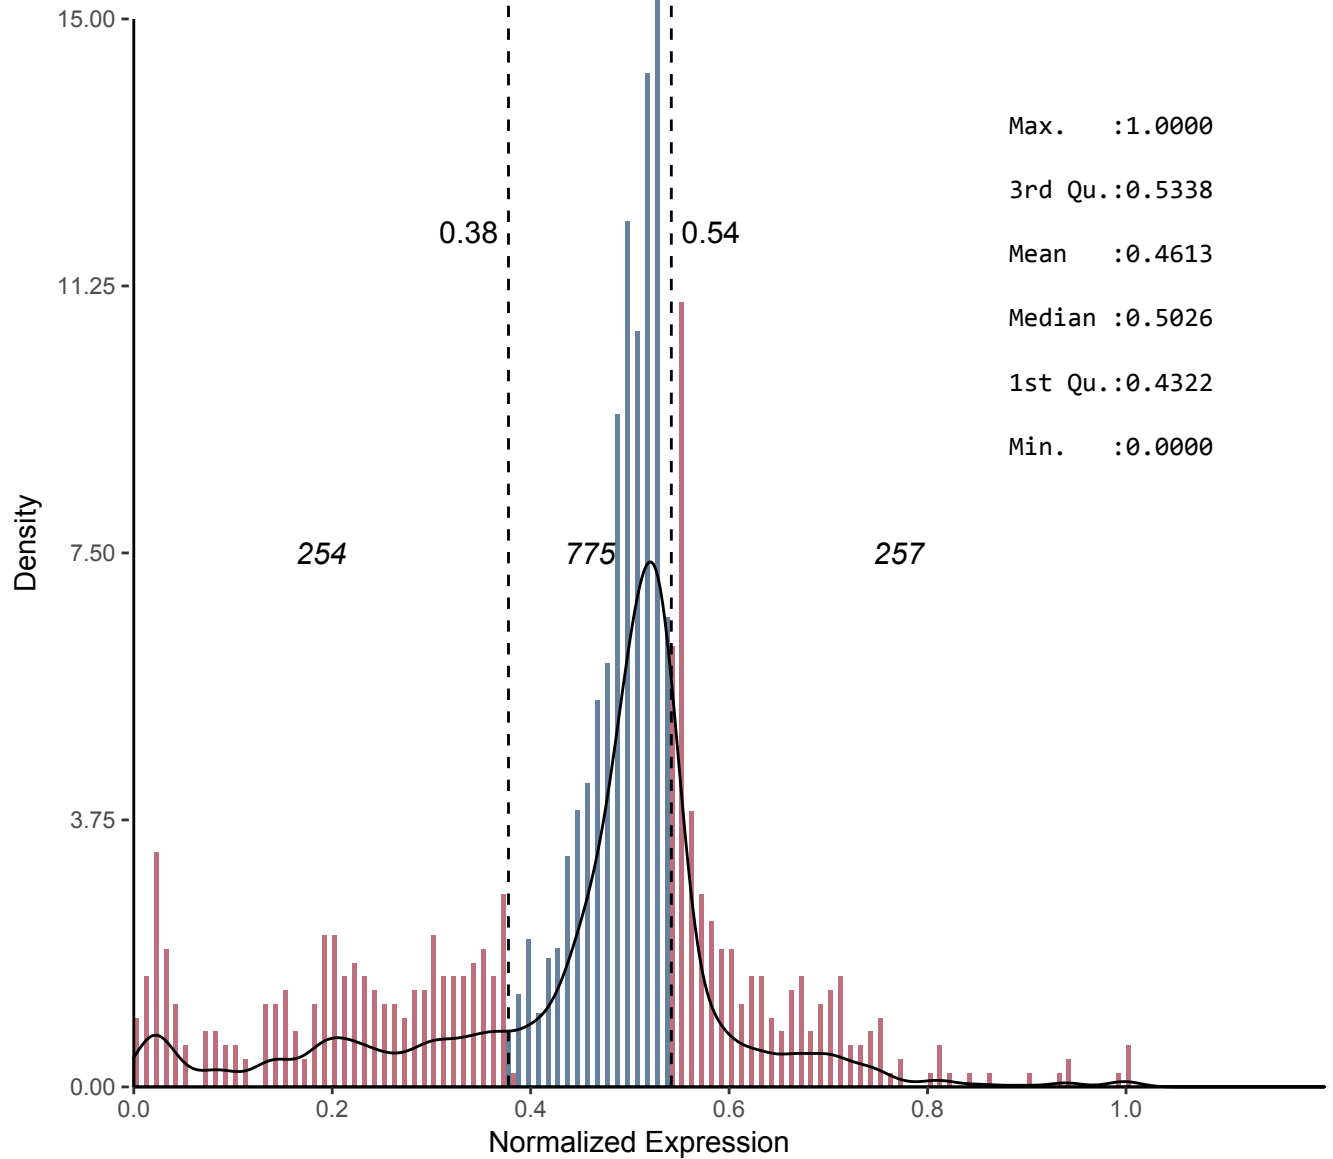

Aberrant TRUE FALSE

Figure 66 - CD57\*

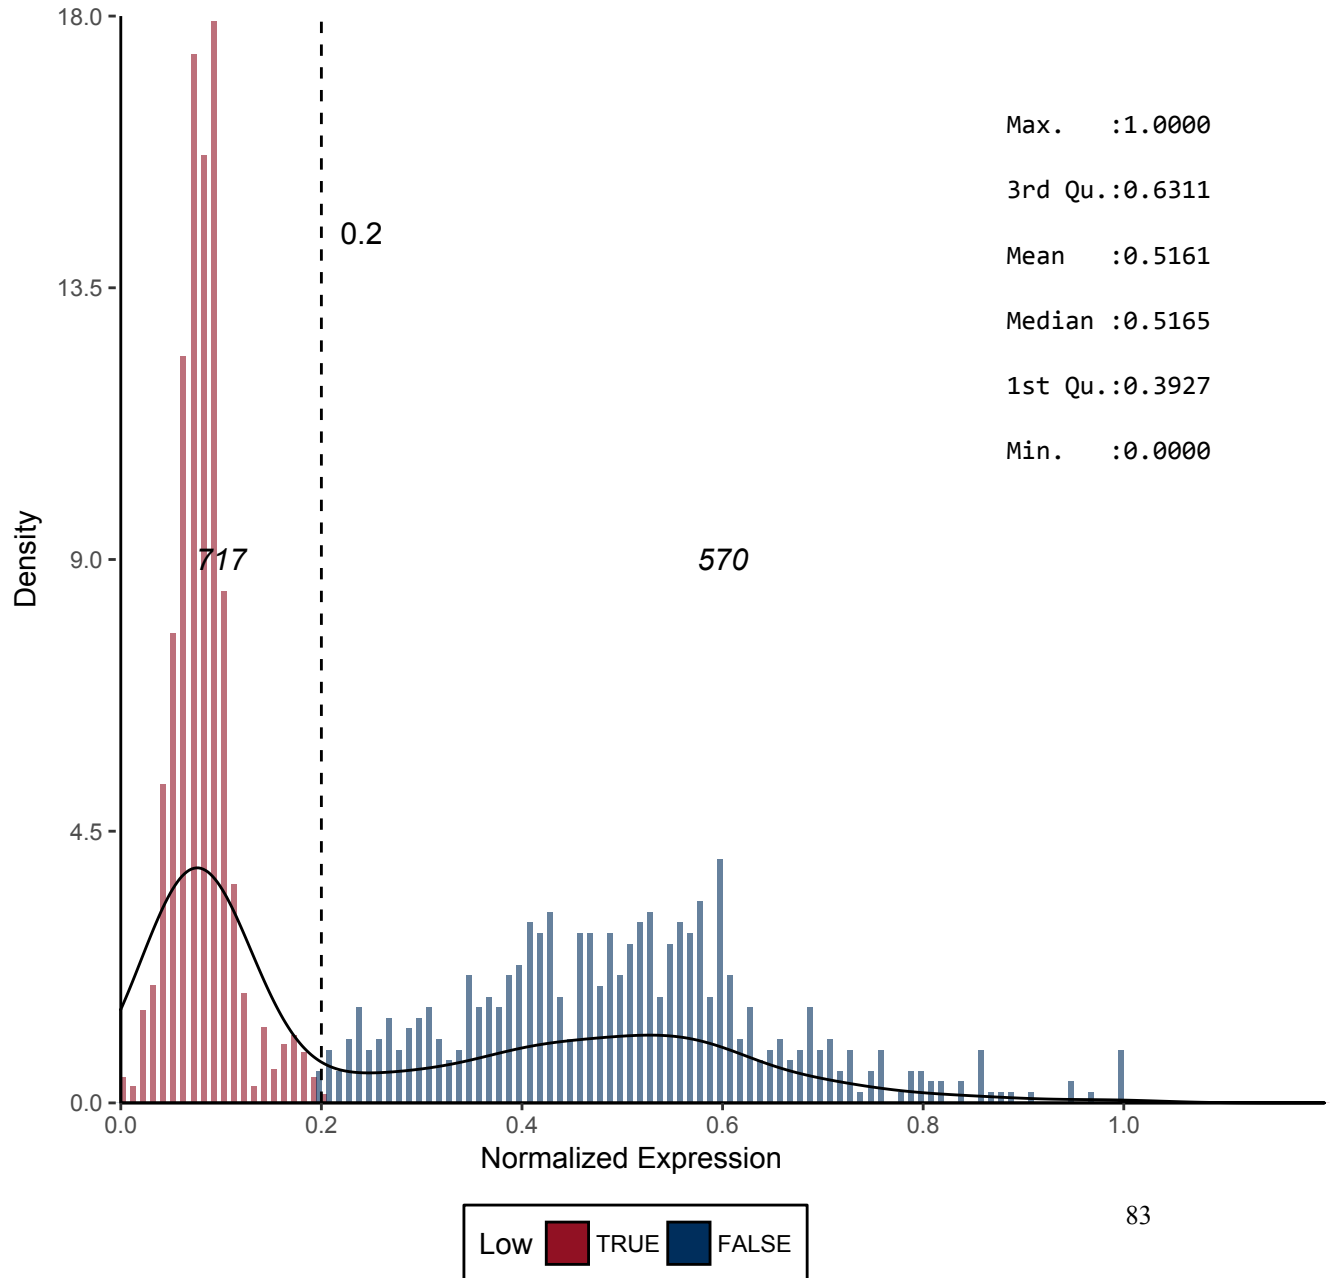

Figure 67 - CD58

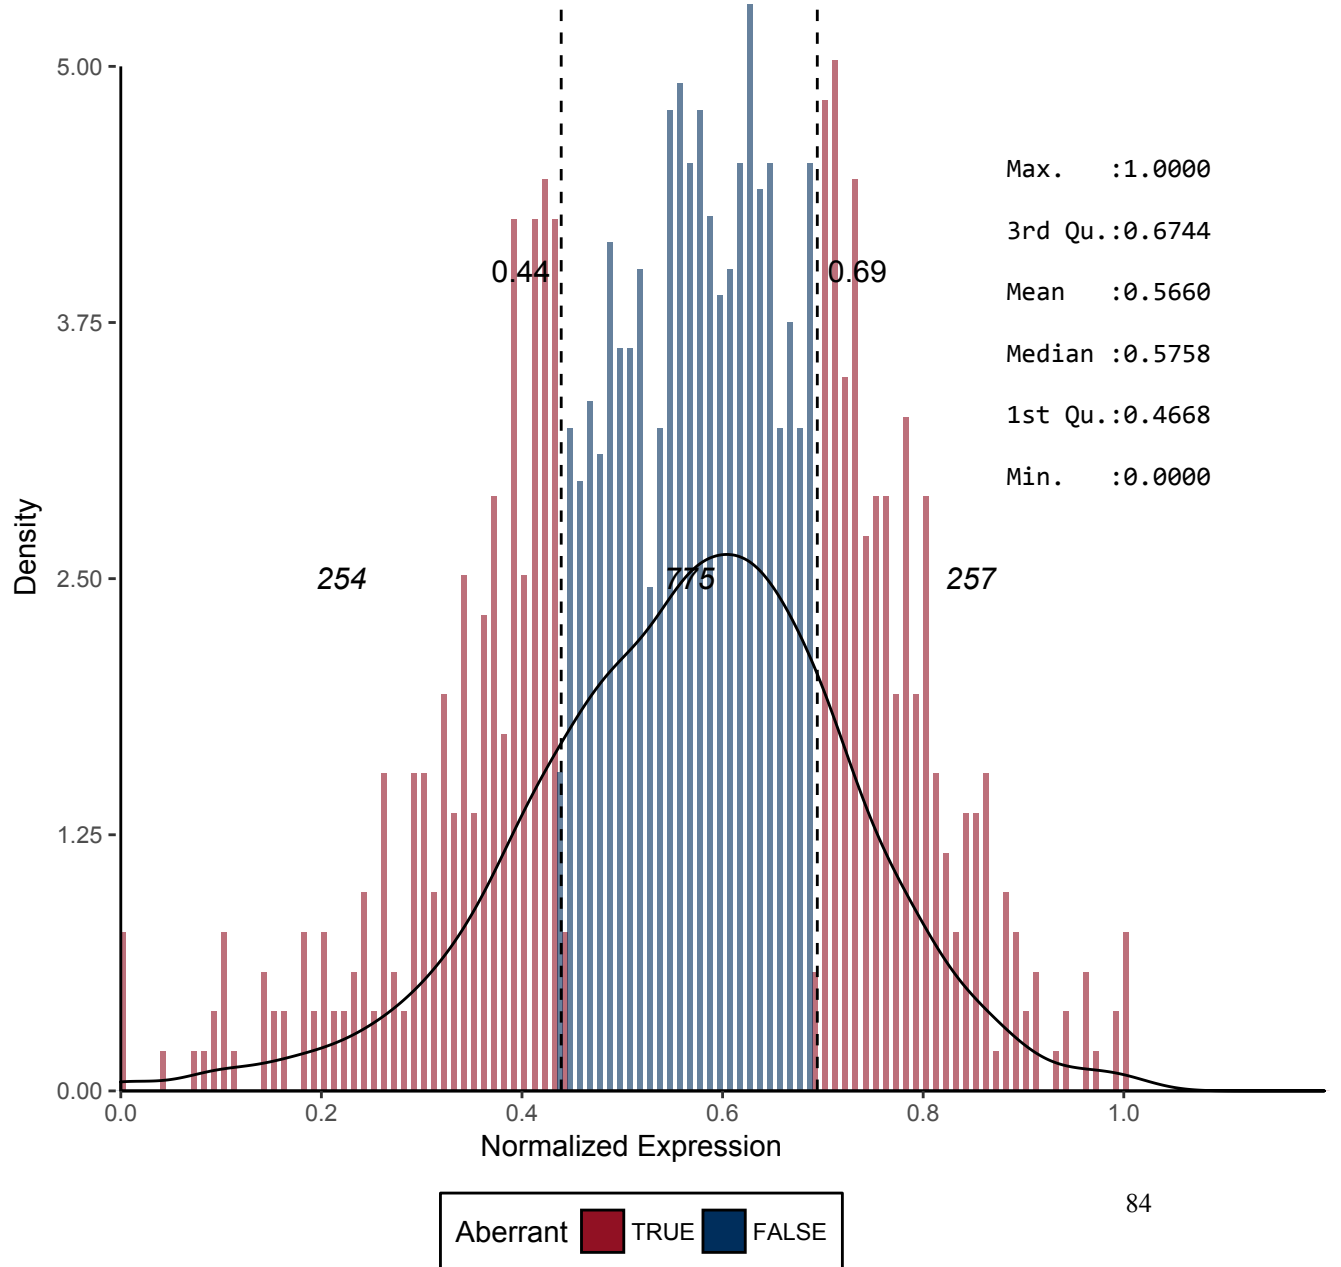

Figure 68 - CD59

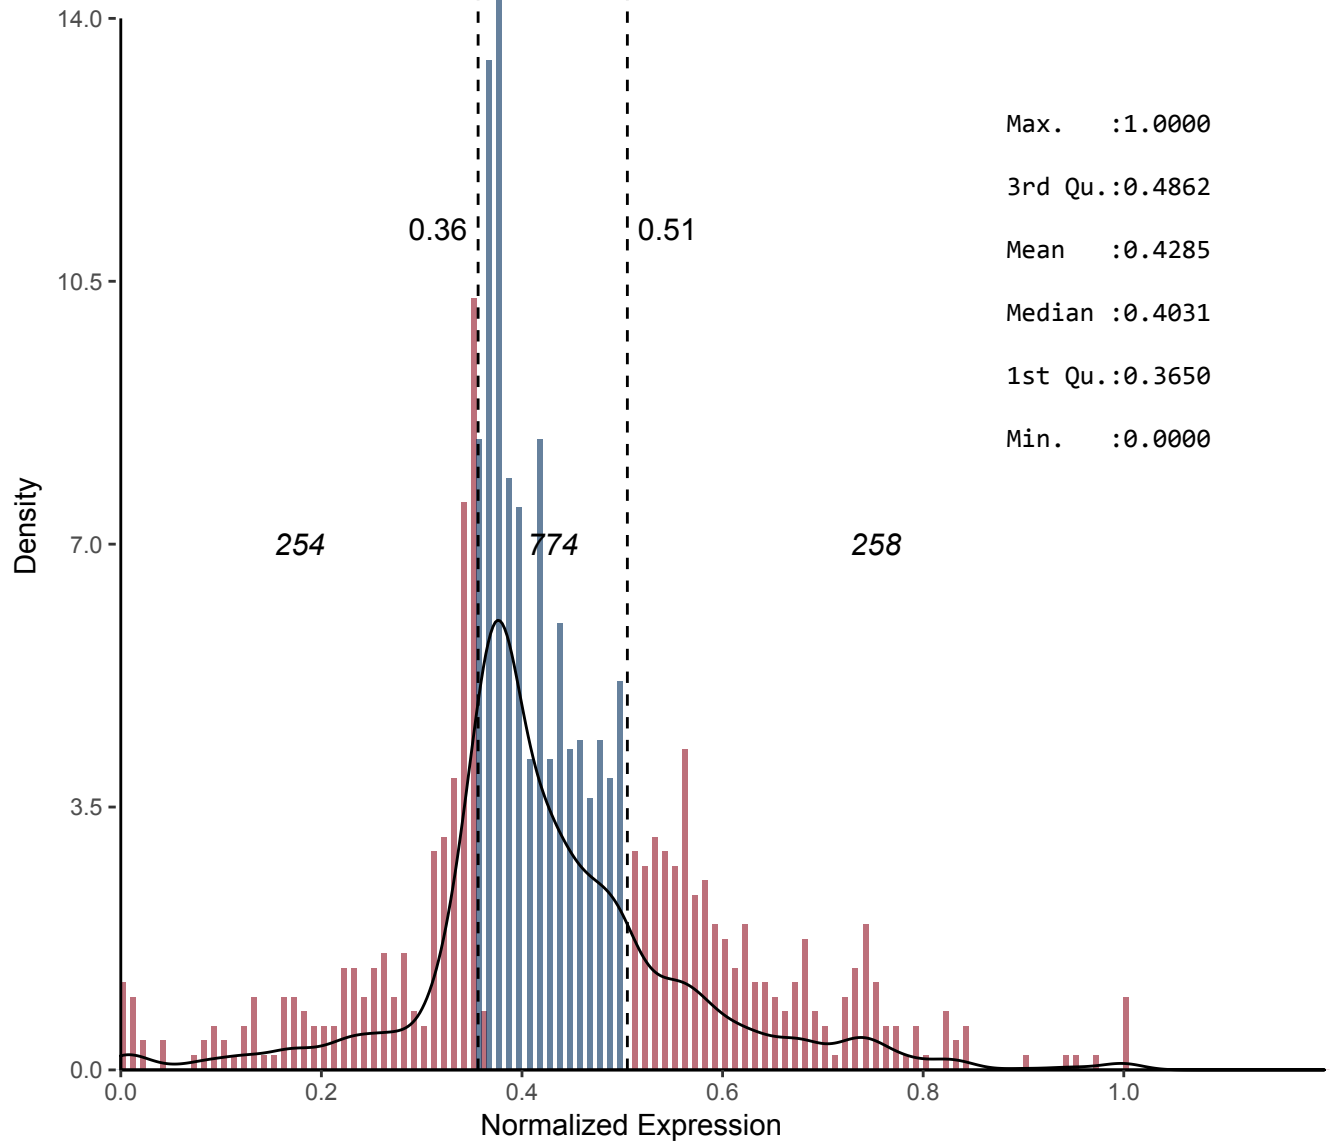

Aberrant TRUE FALSE

Figure 69 - CD61

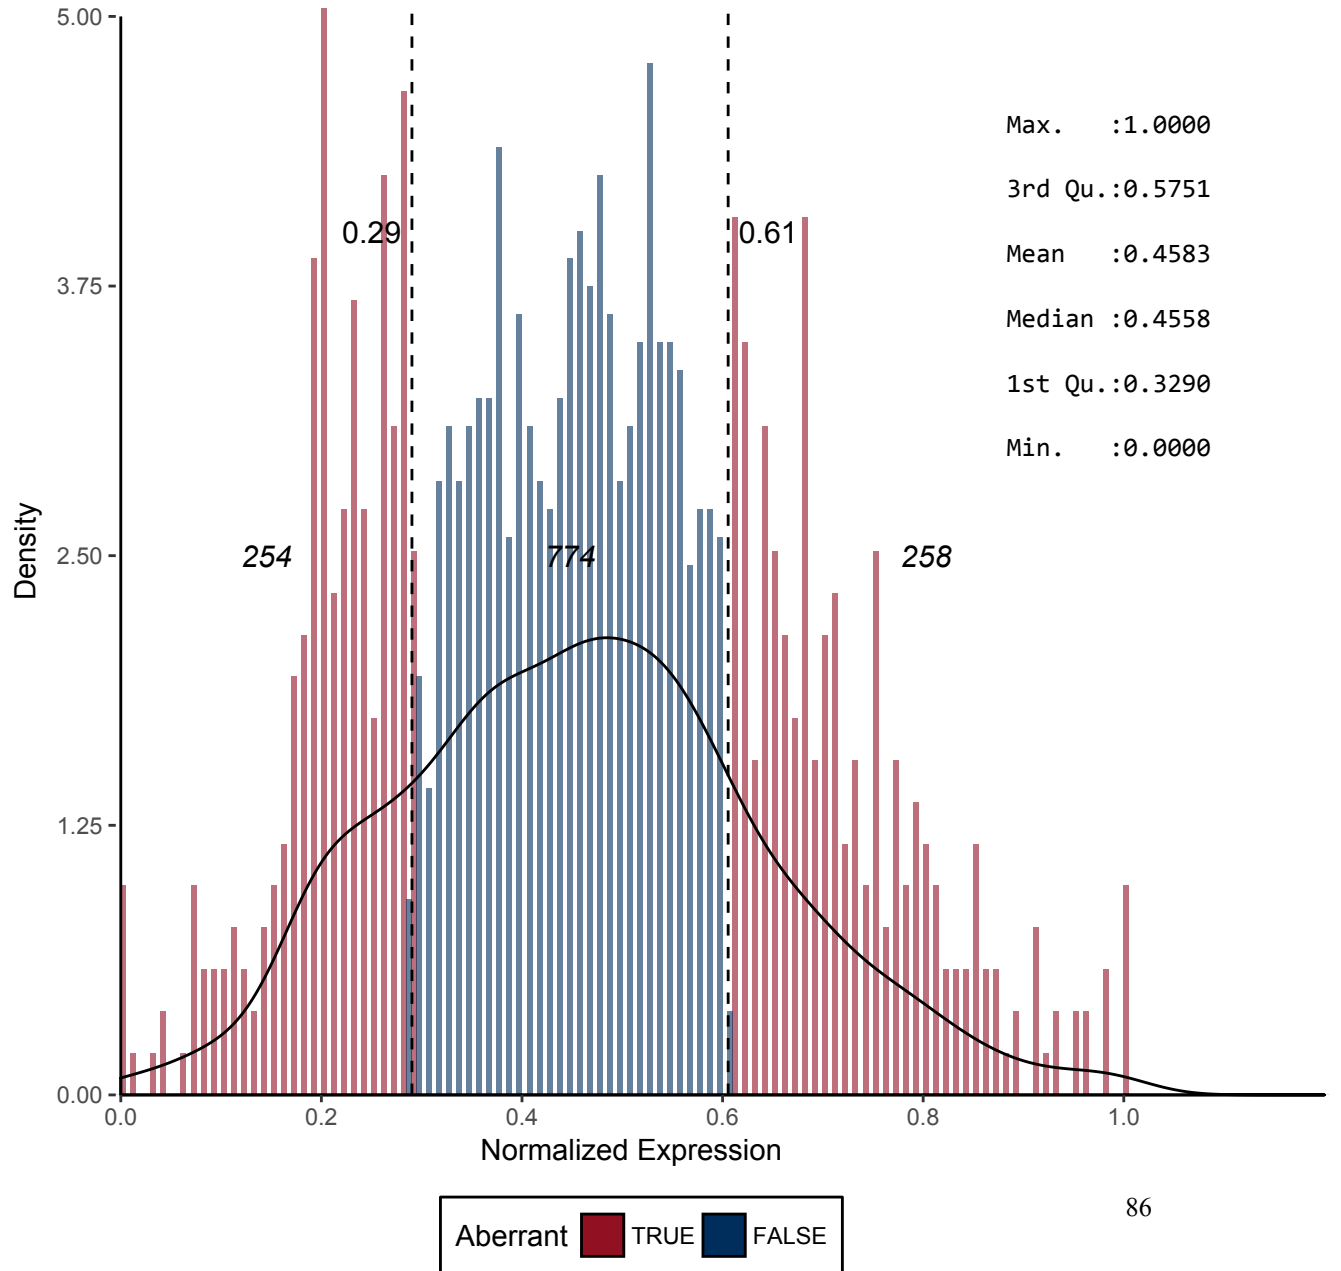

Figure 70 - CD62E\*

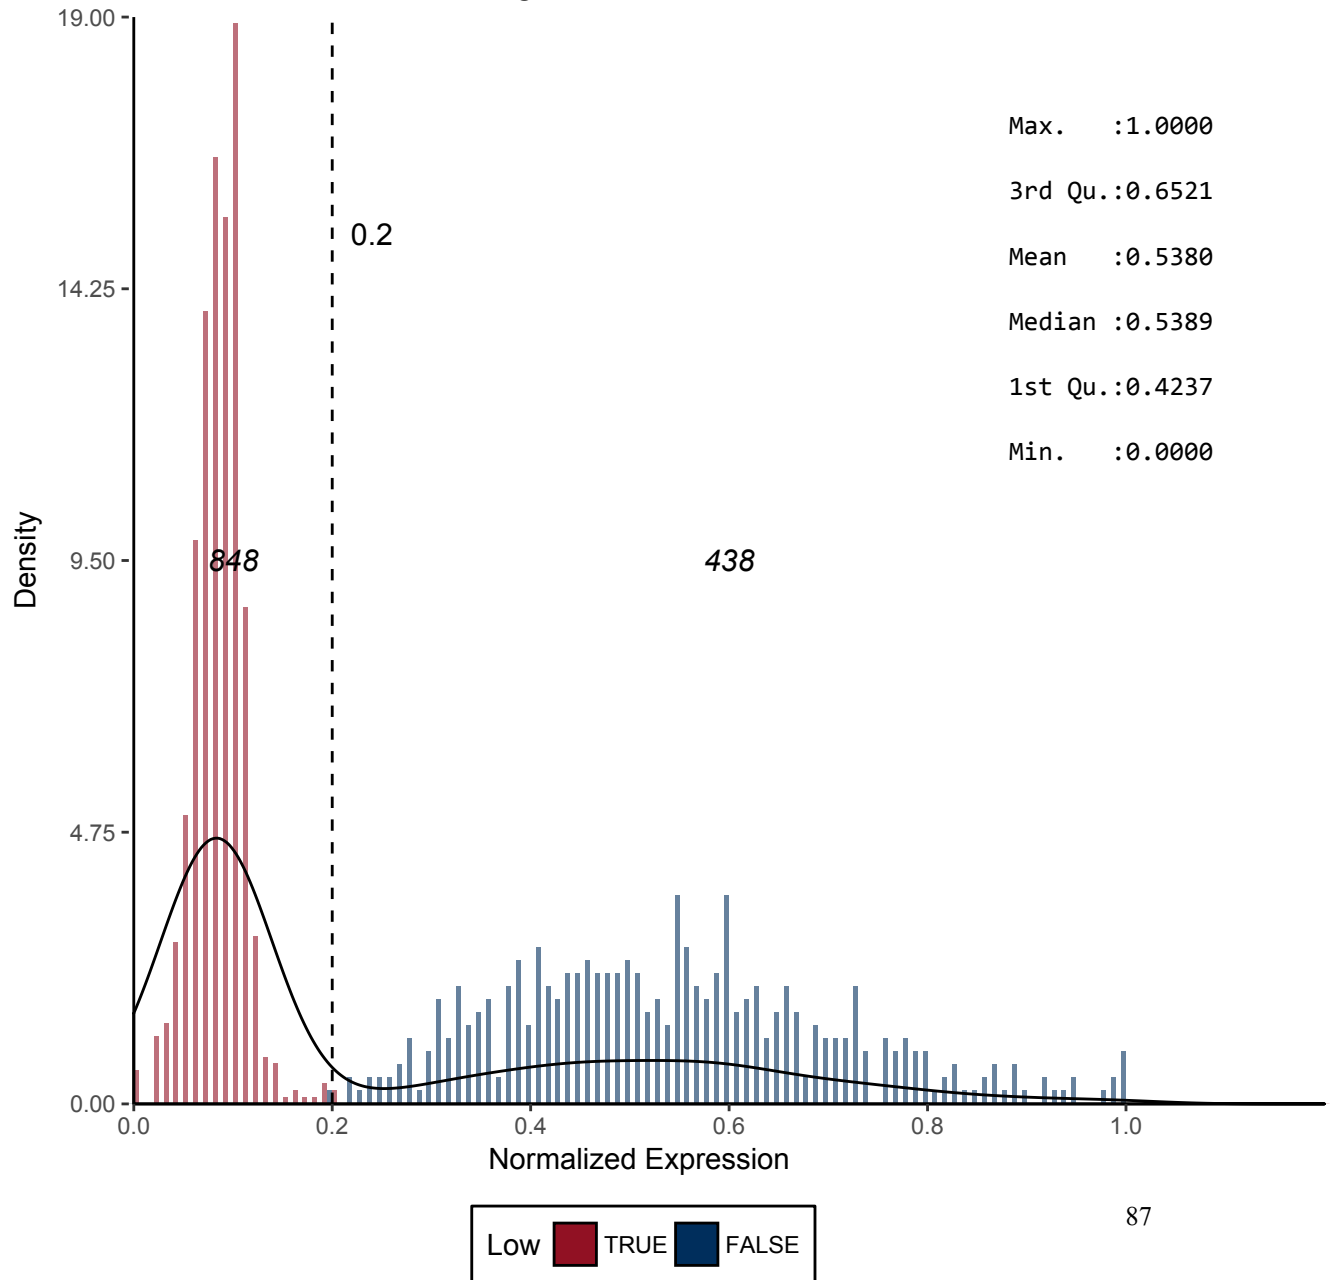

Figure 71 - CD62L\*

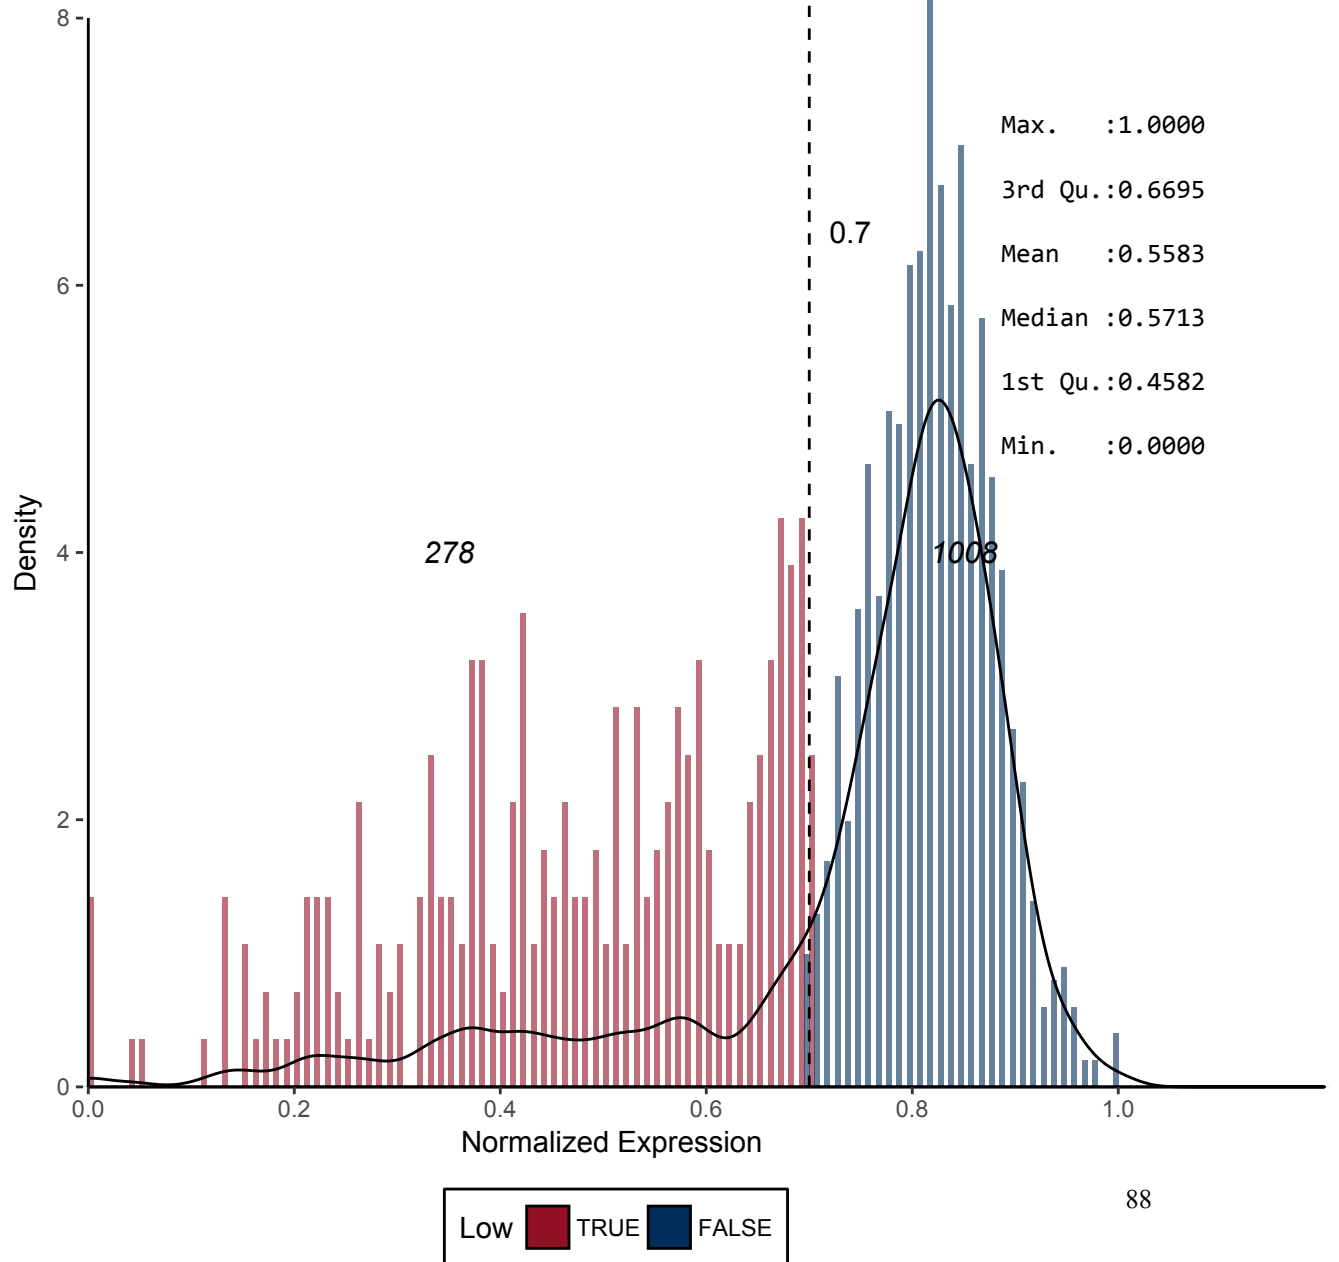



Figure 72 - CD62P

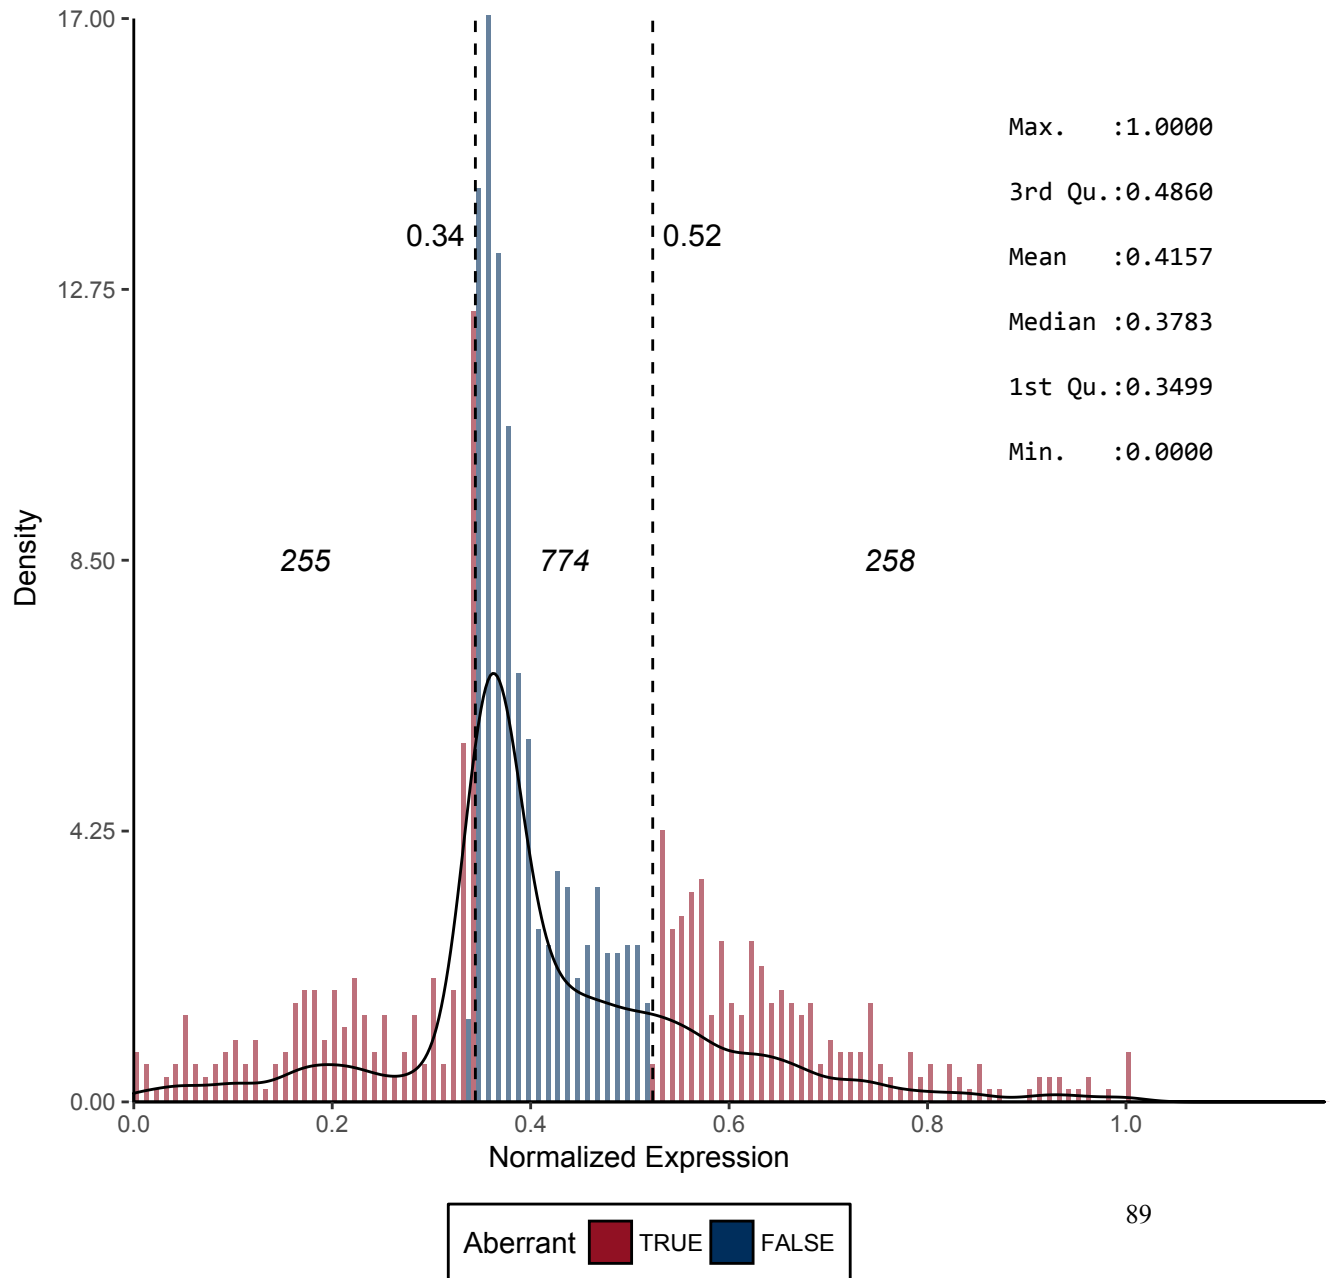

Figure 73 - CD63

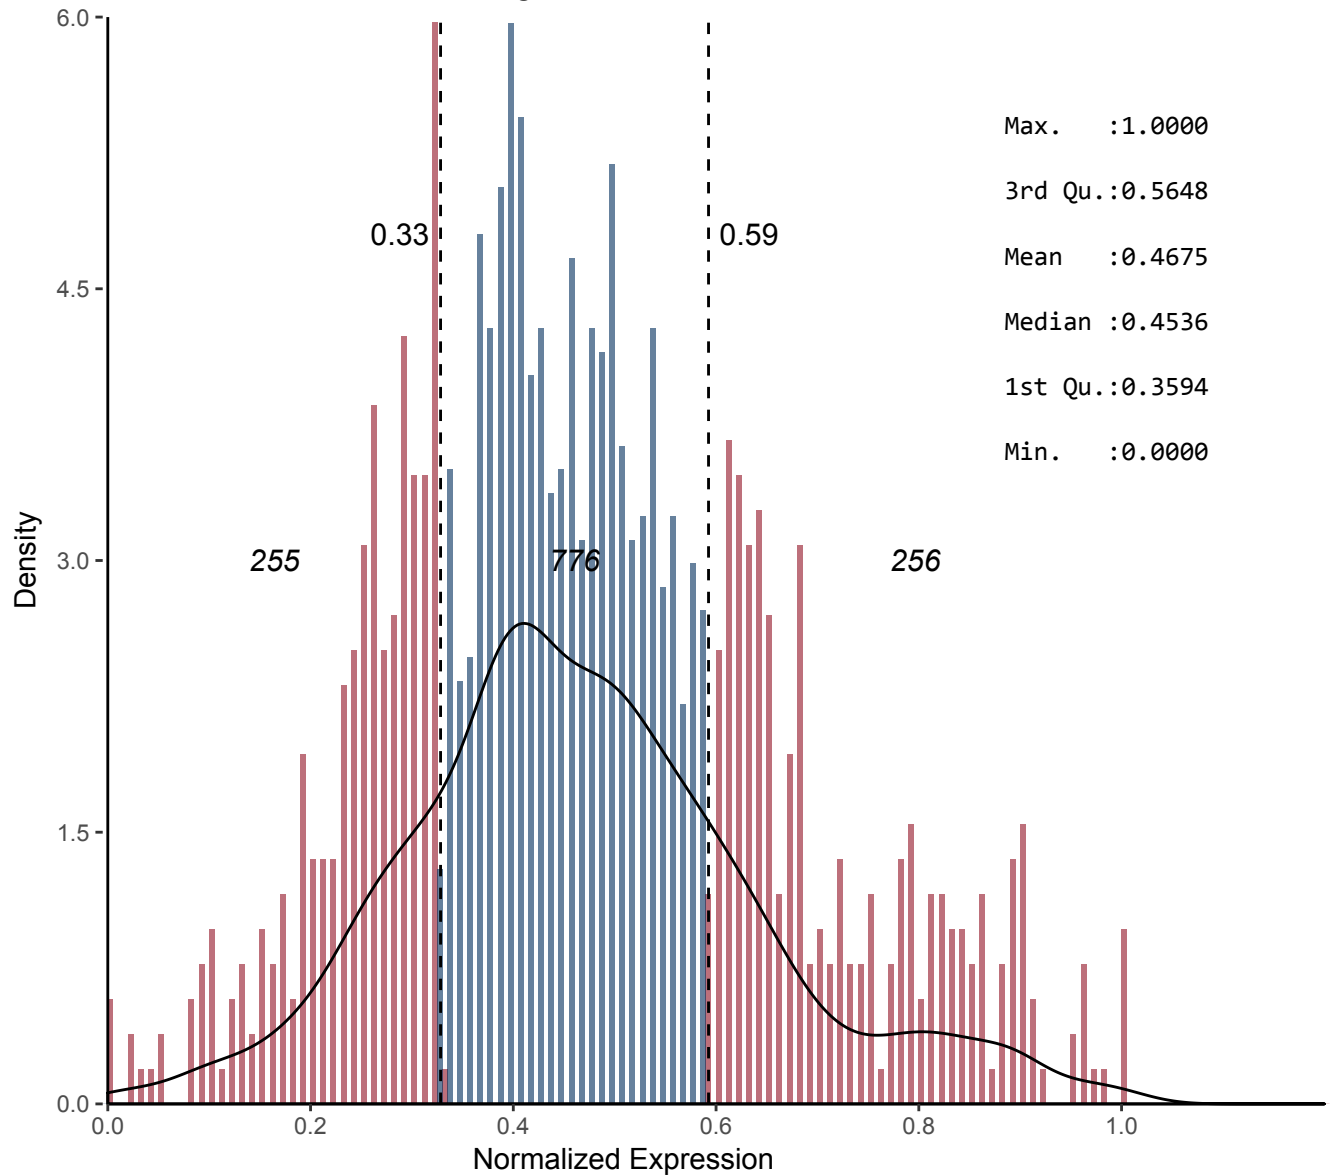

Aberrant TRUE FALSE

Figure 74 - CD66A

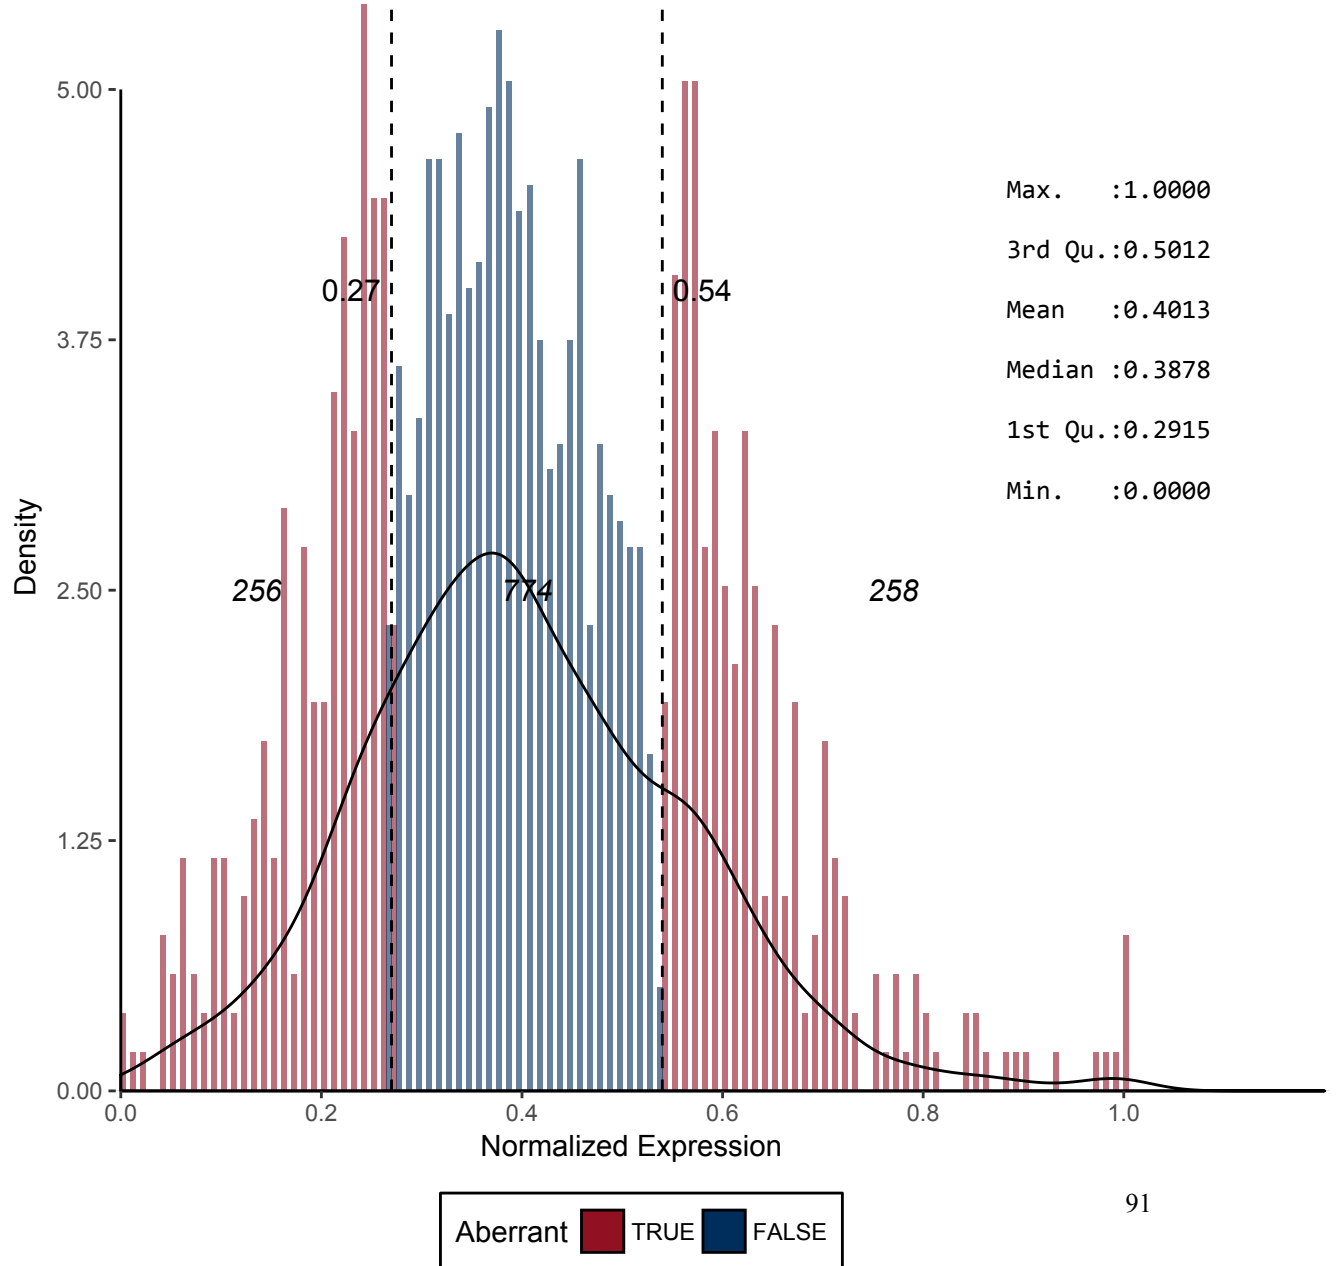

Figure 75 - CD66B

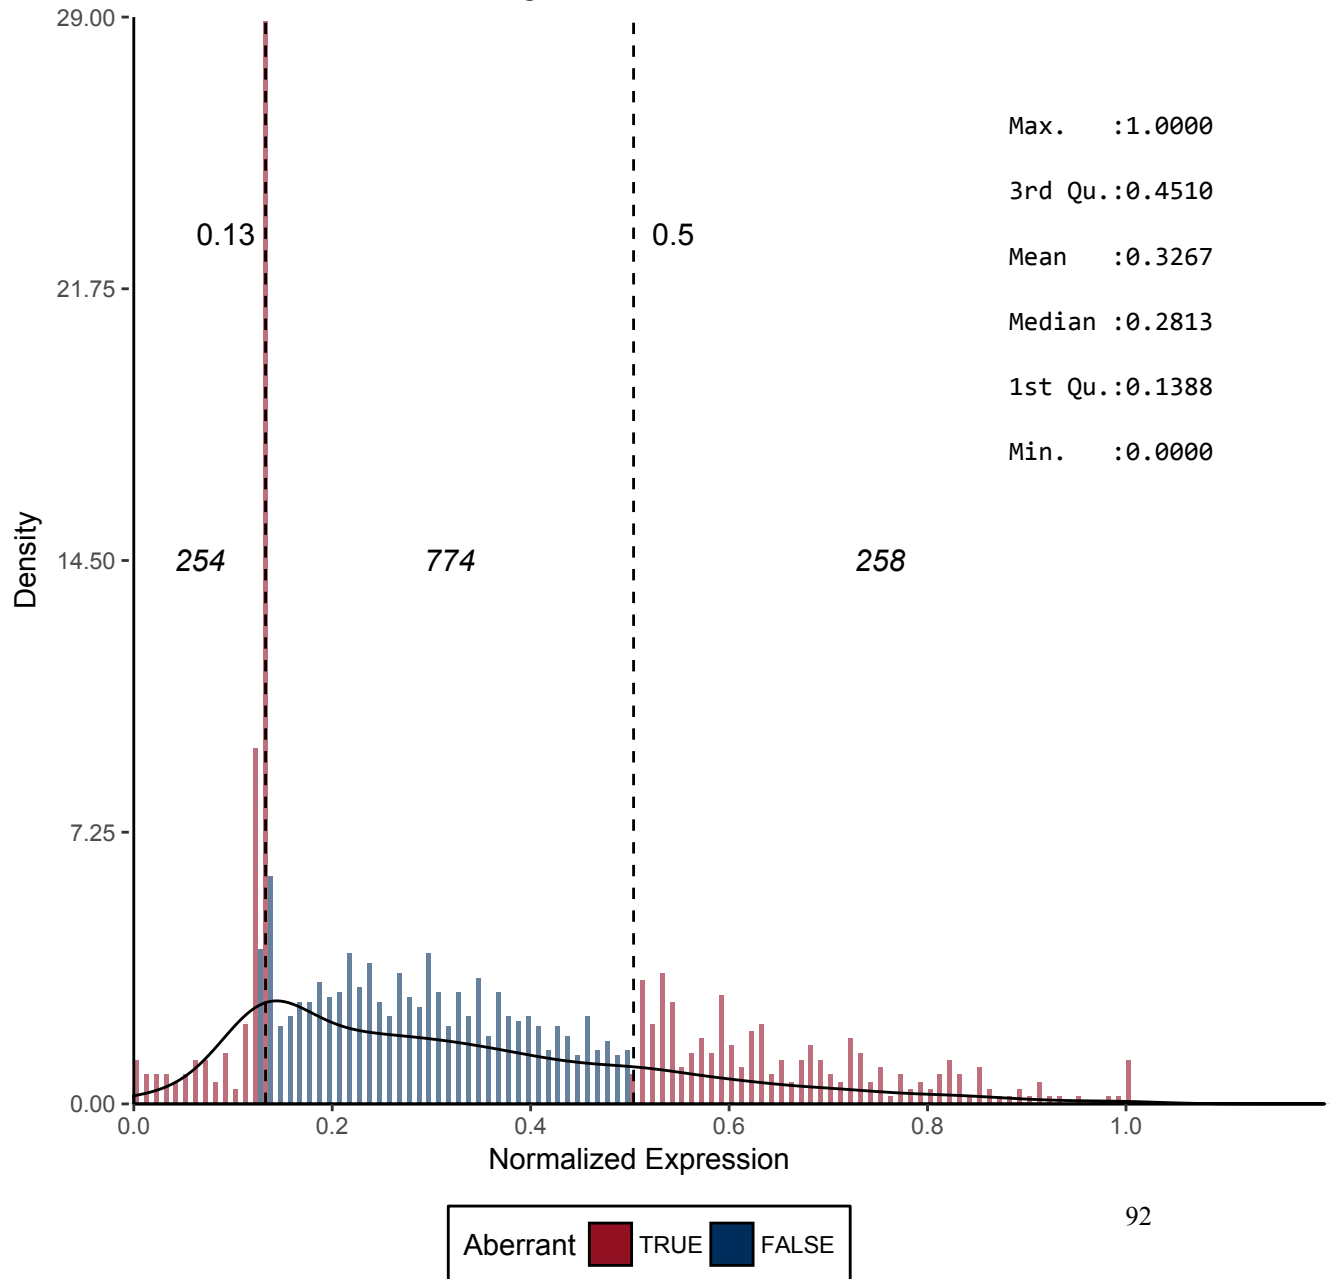

Figure 76 - CD66C

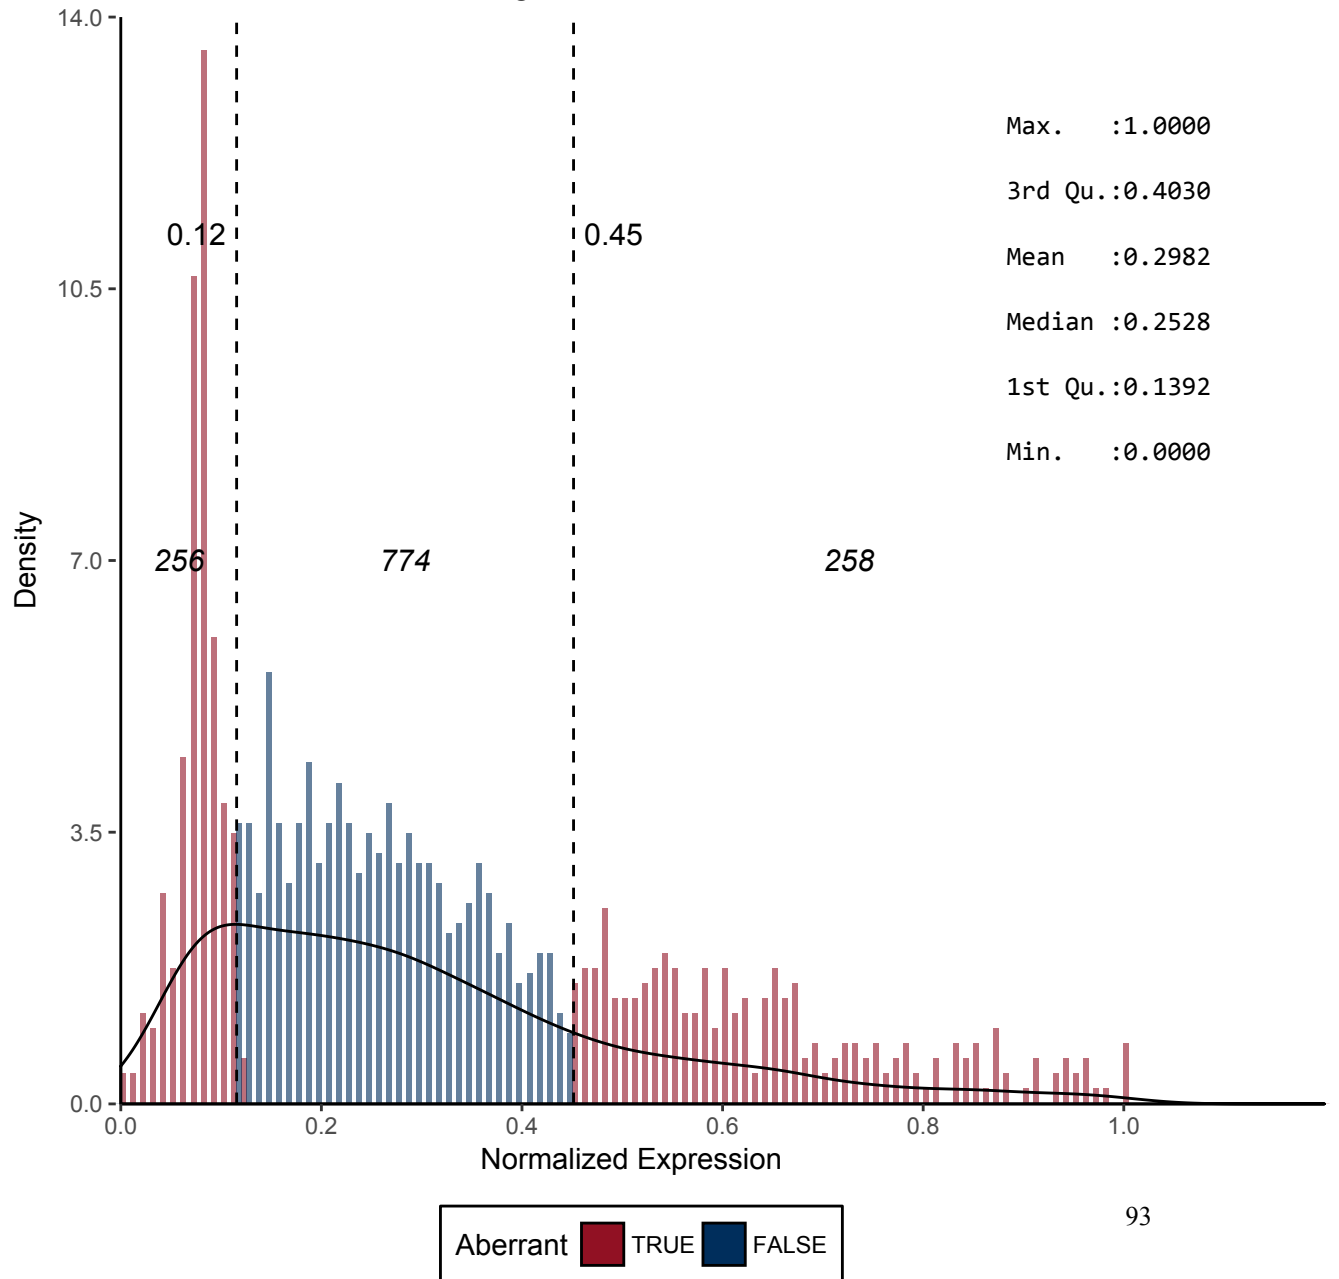

Figure 77 - CD66D

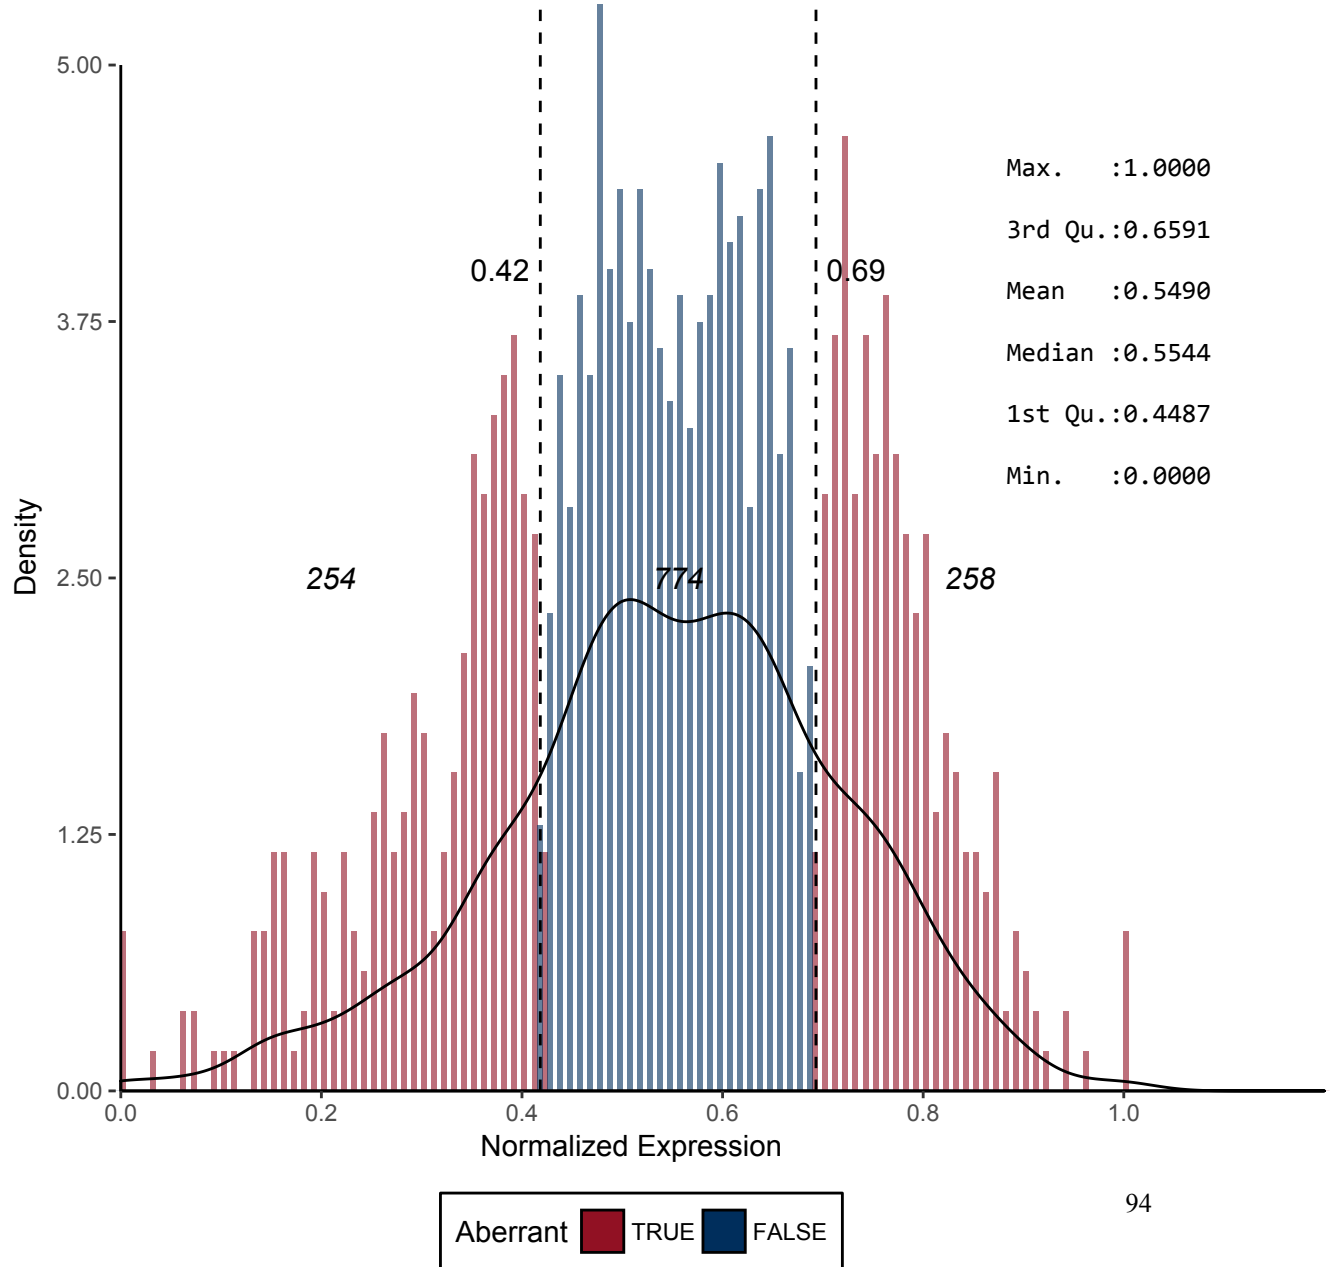

Figure 78 - CD66E\*

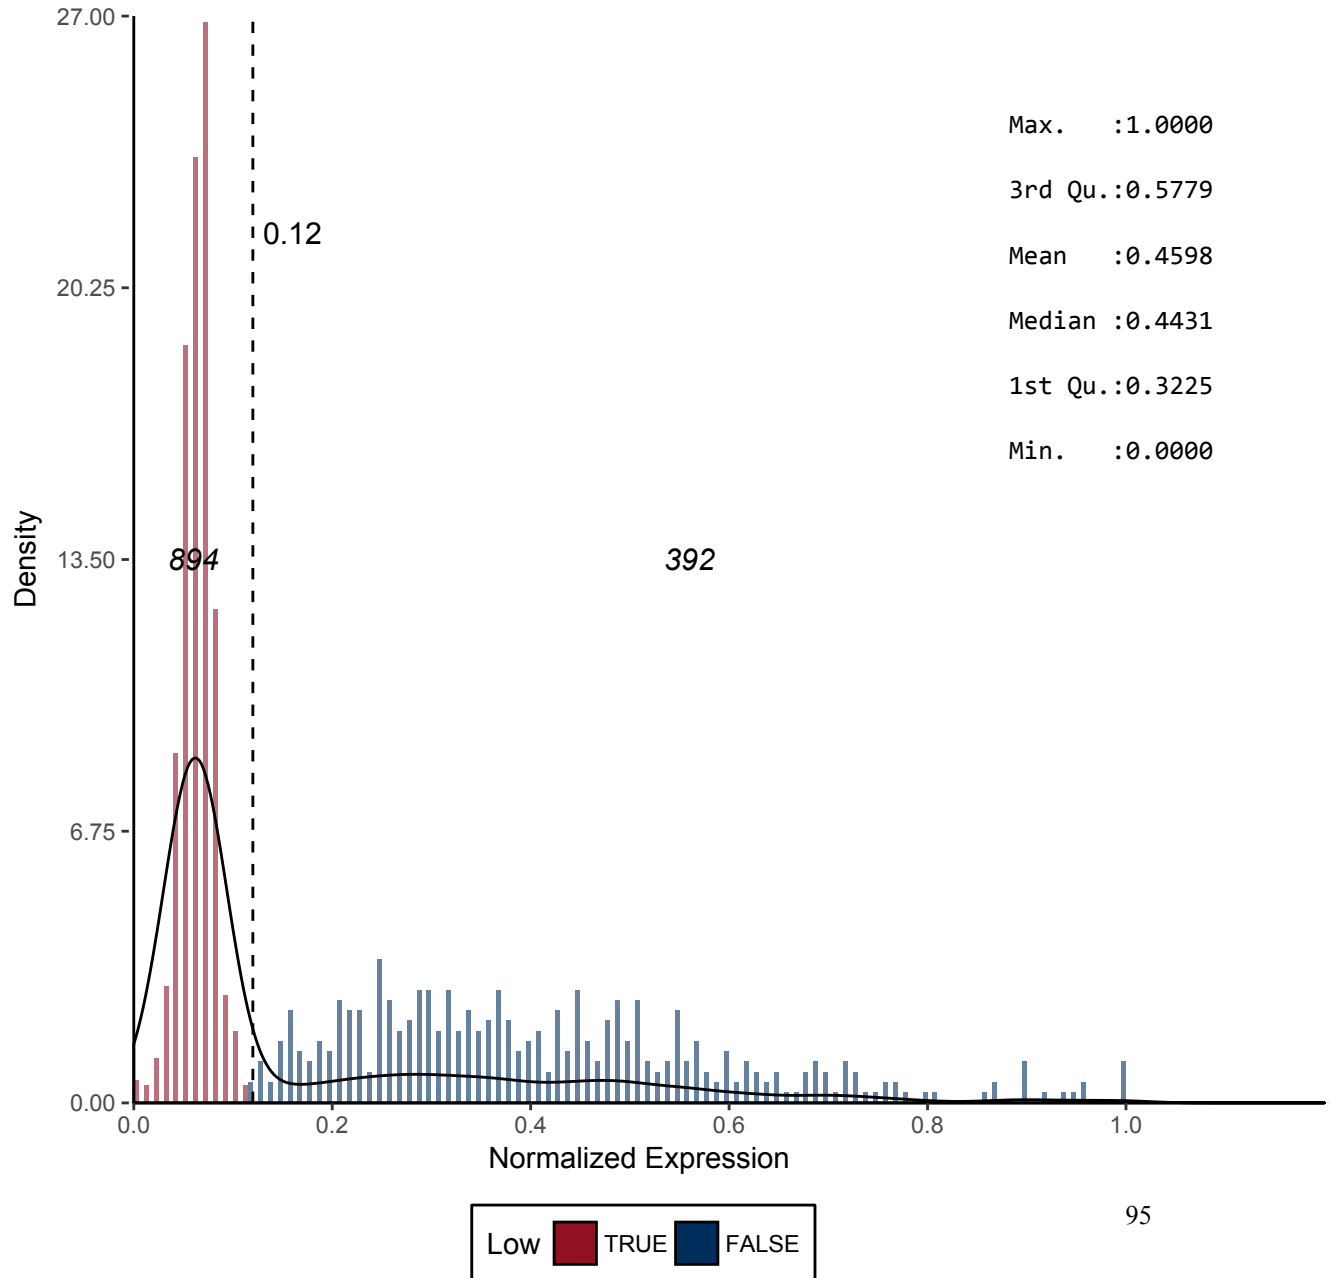

Figure 79 - CD66F\*

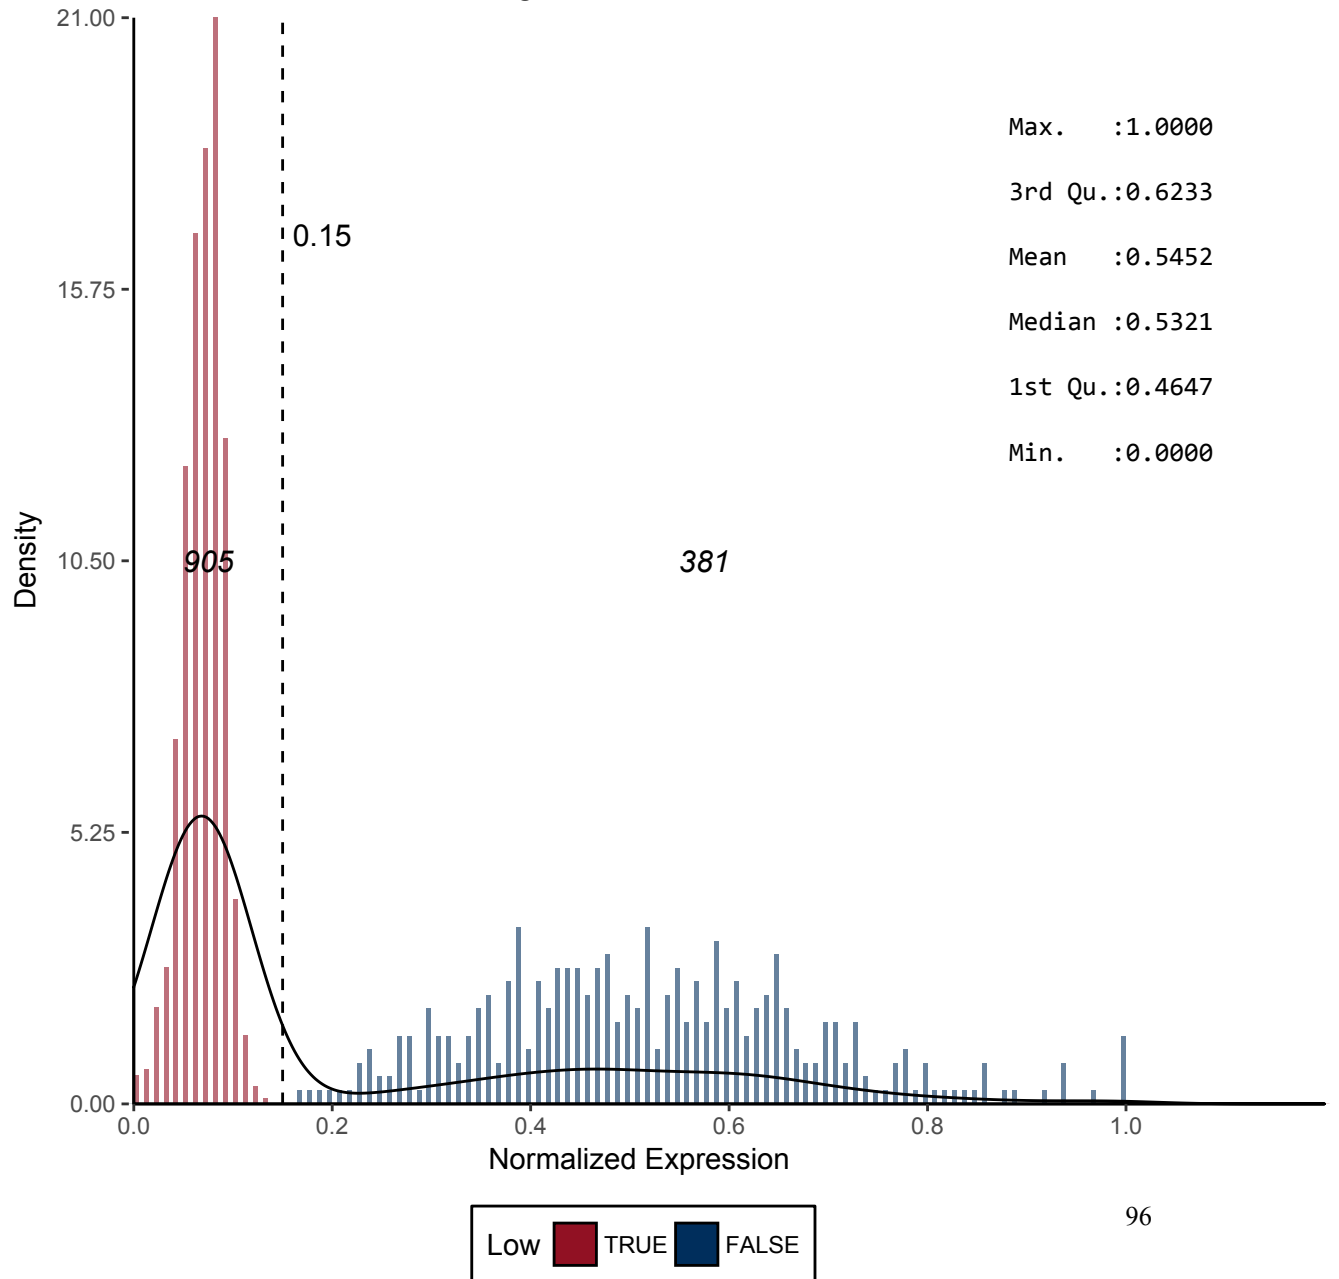



Figure 80 - CD68

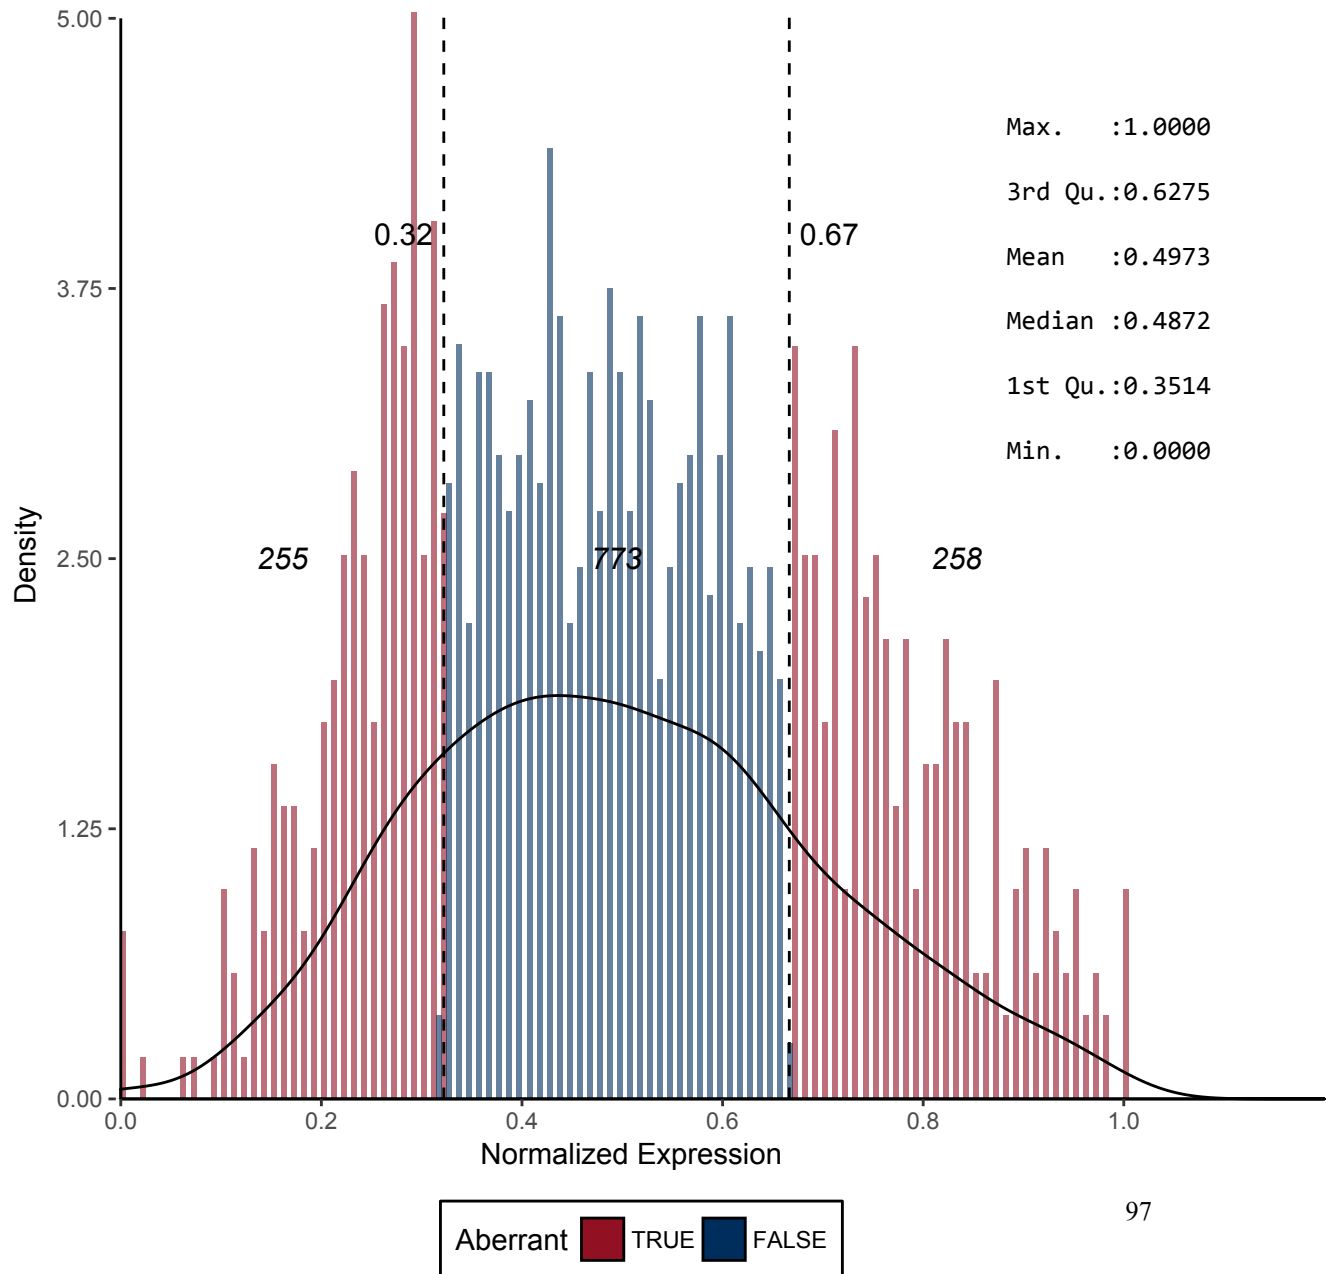

Figure 81 - CD69

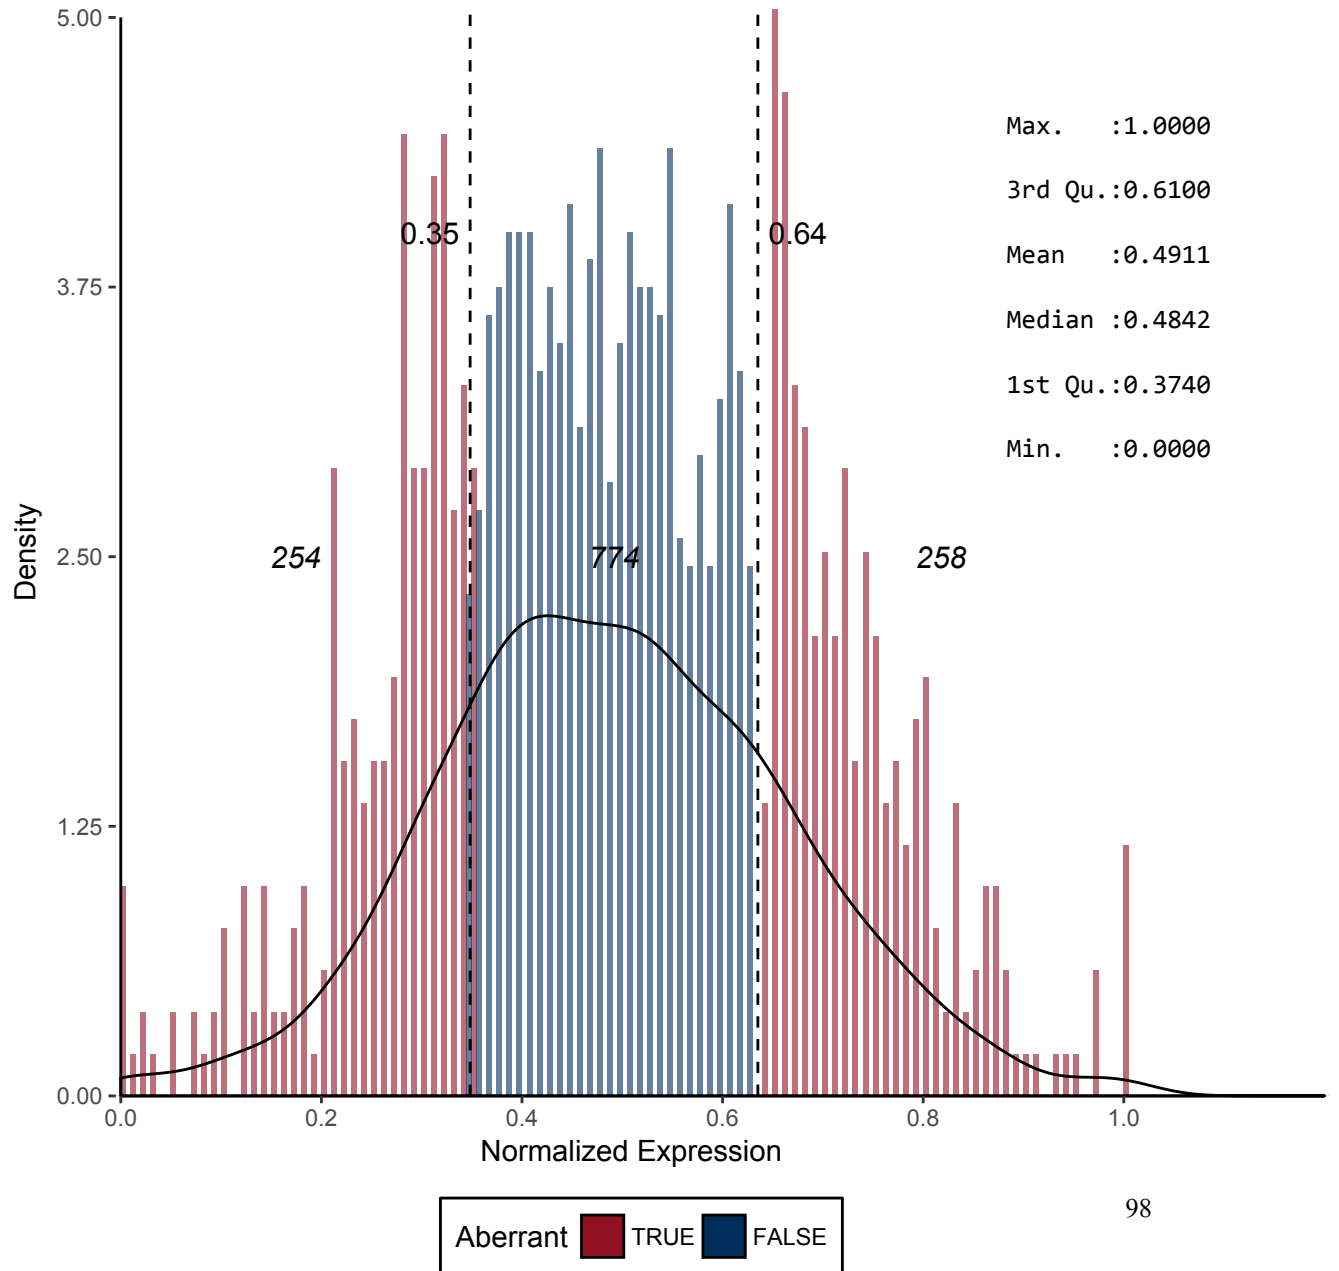

Figure 82 - CD70

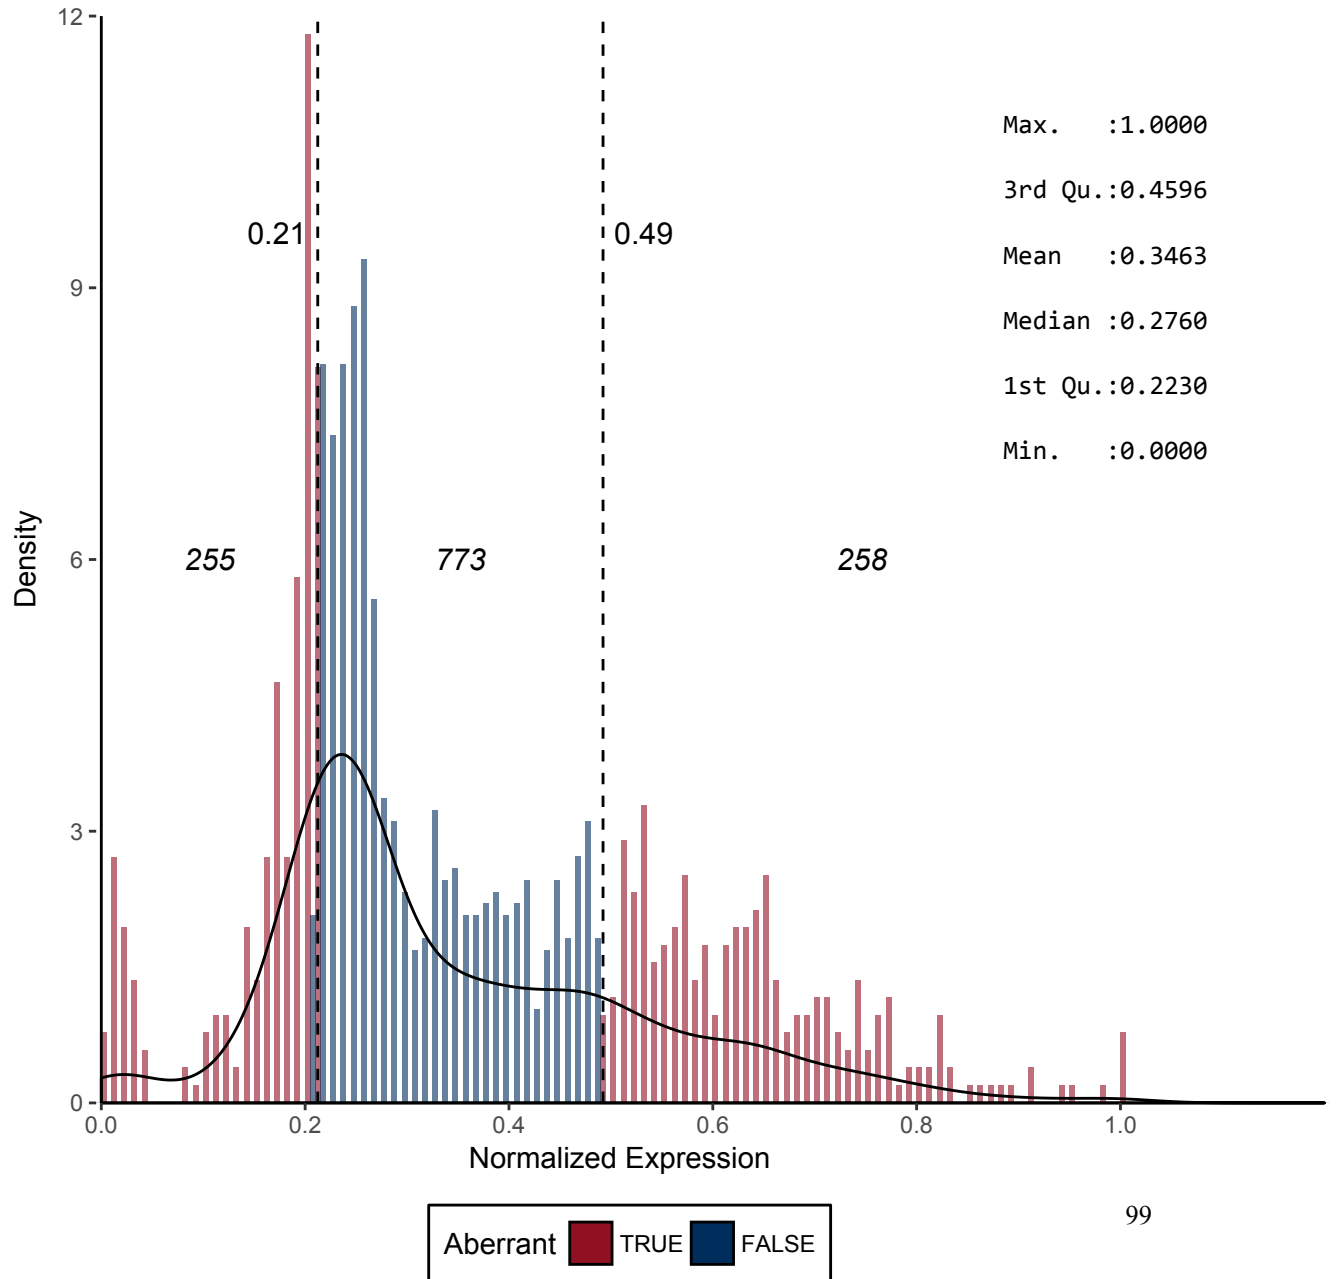

Figure 83 - CD71

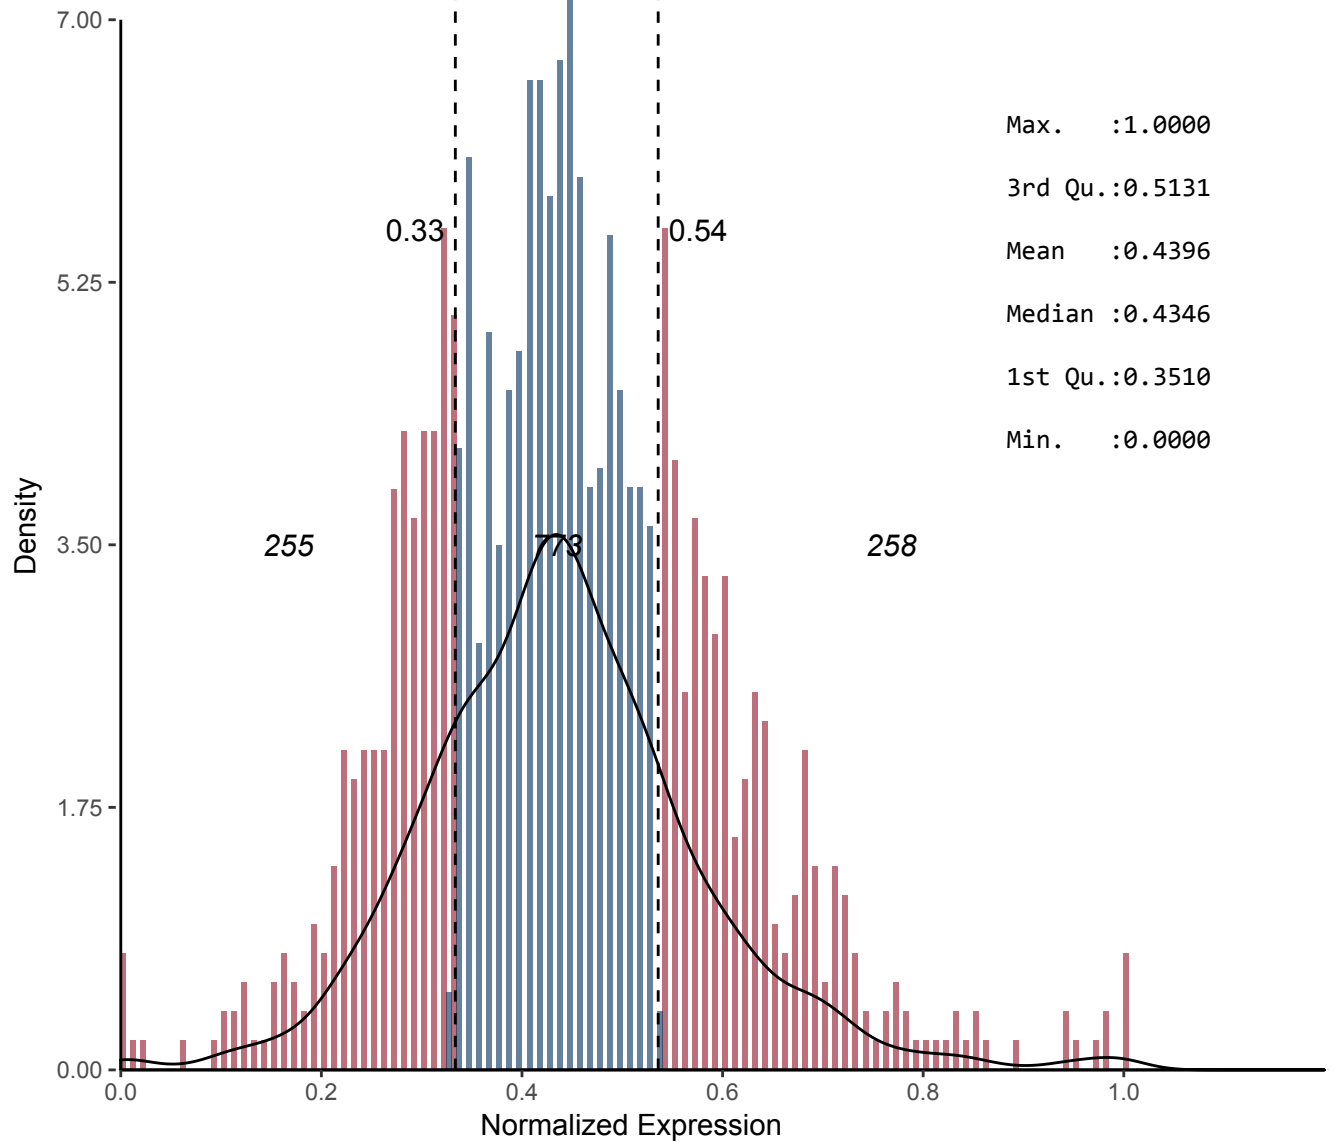

Aberrant TRUE FALSE

Figure 84 - CD72\*

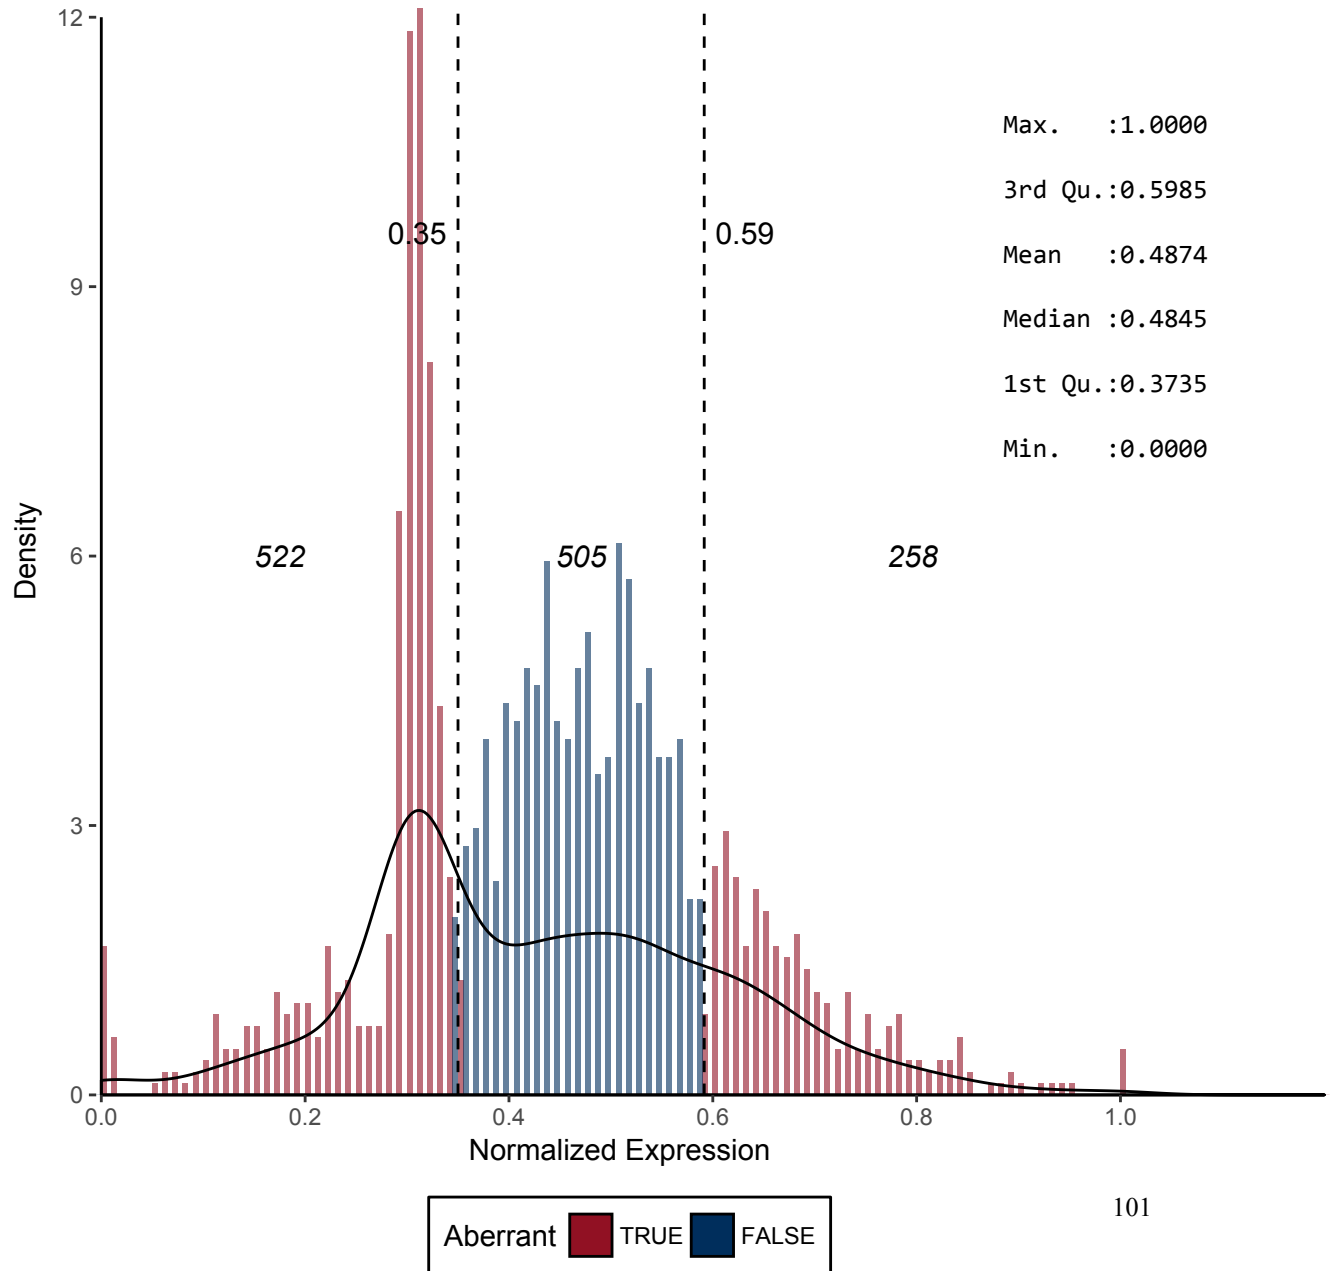

Figure 85 - CD73

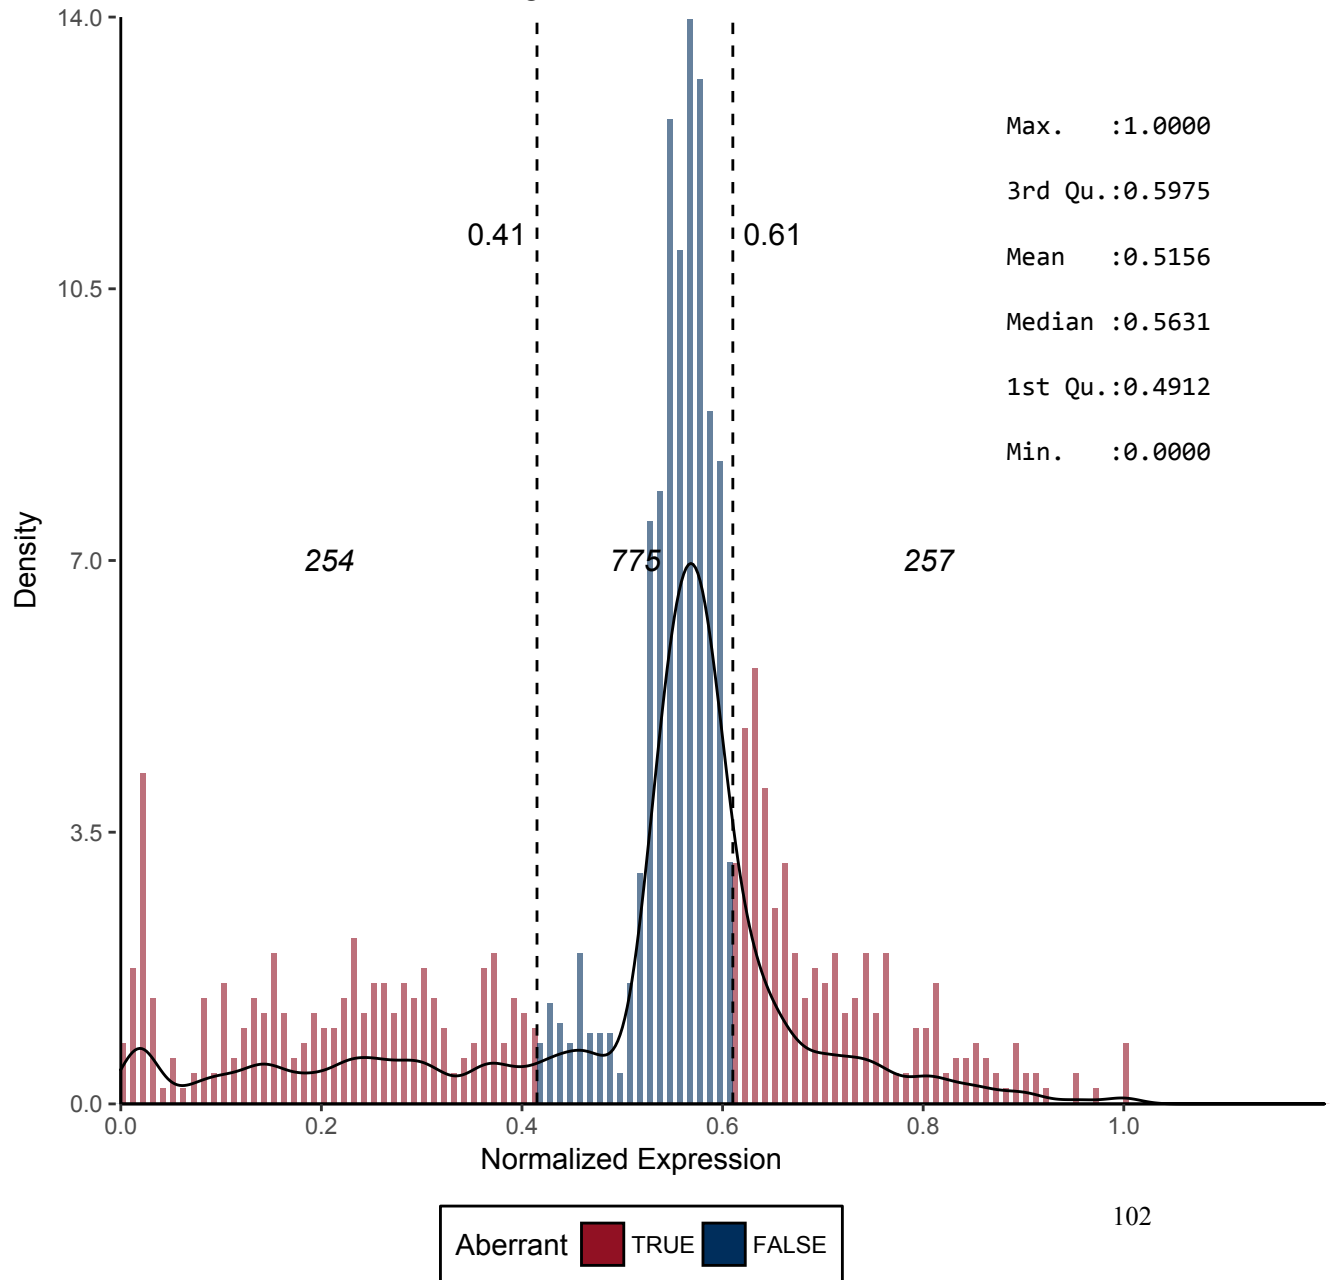

Figure 86 - CD74

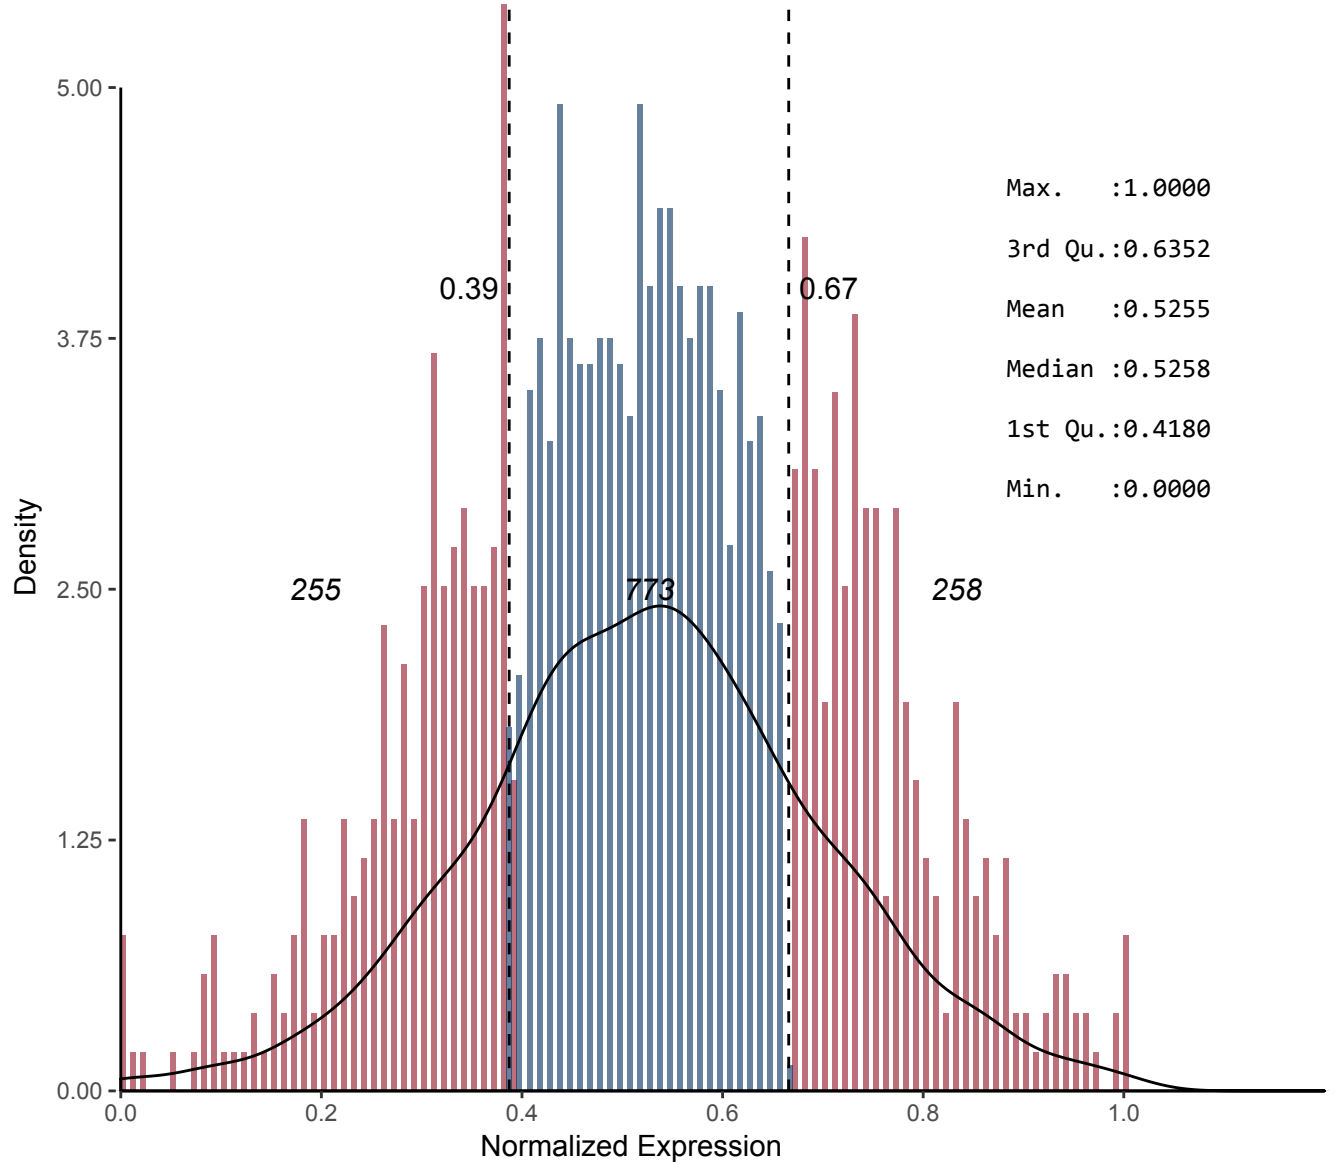

Aberrant TRUE FALSE

Figure 87 - CD79A

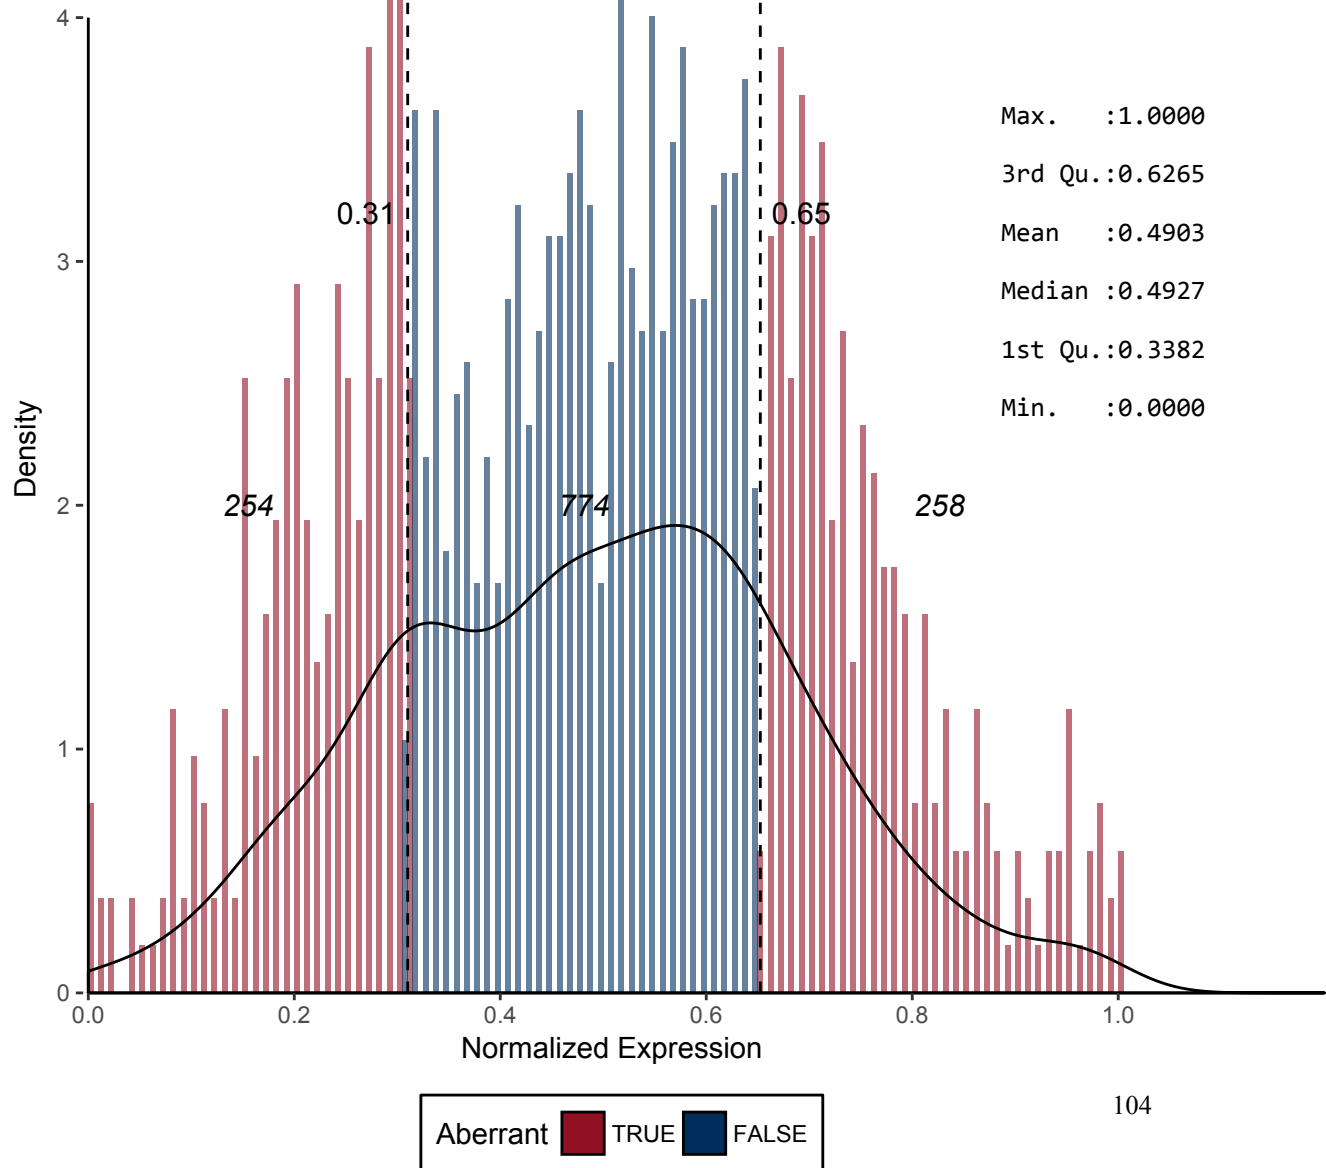



Figure 88 - CD79B

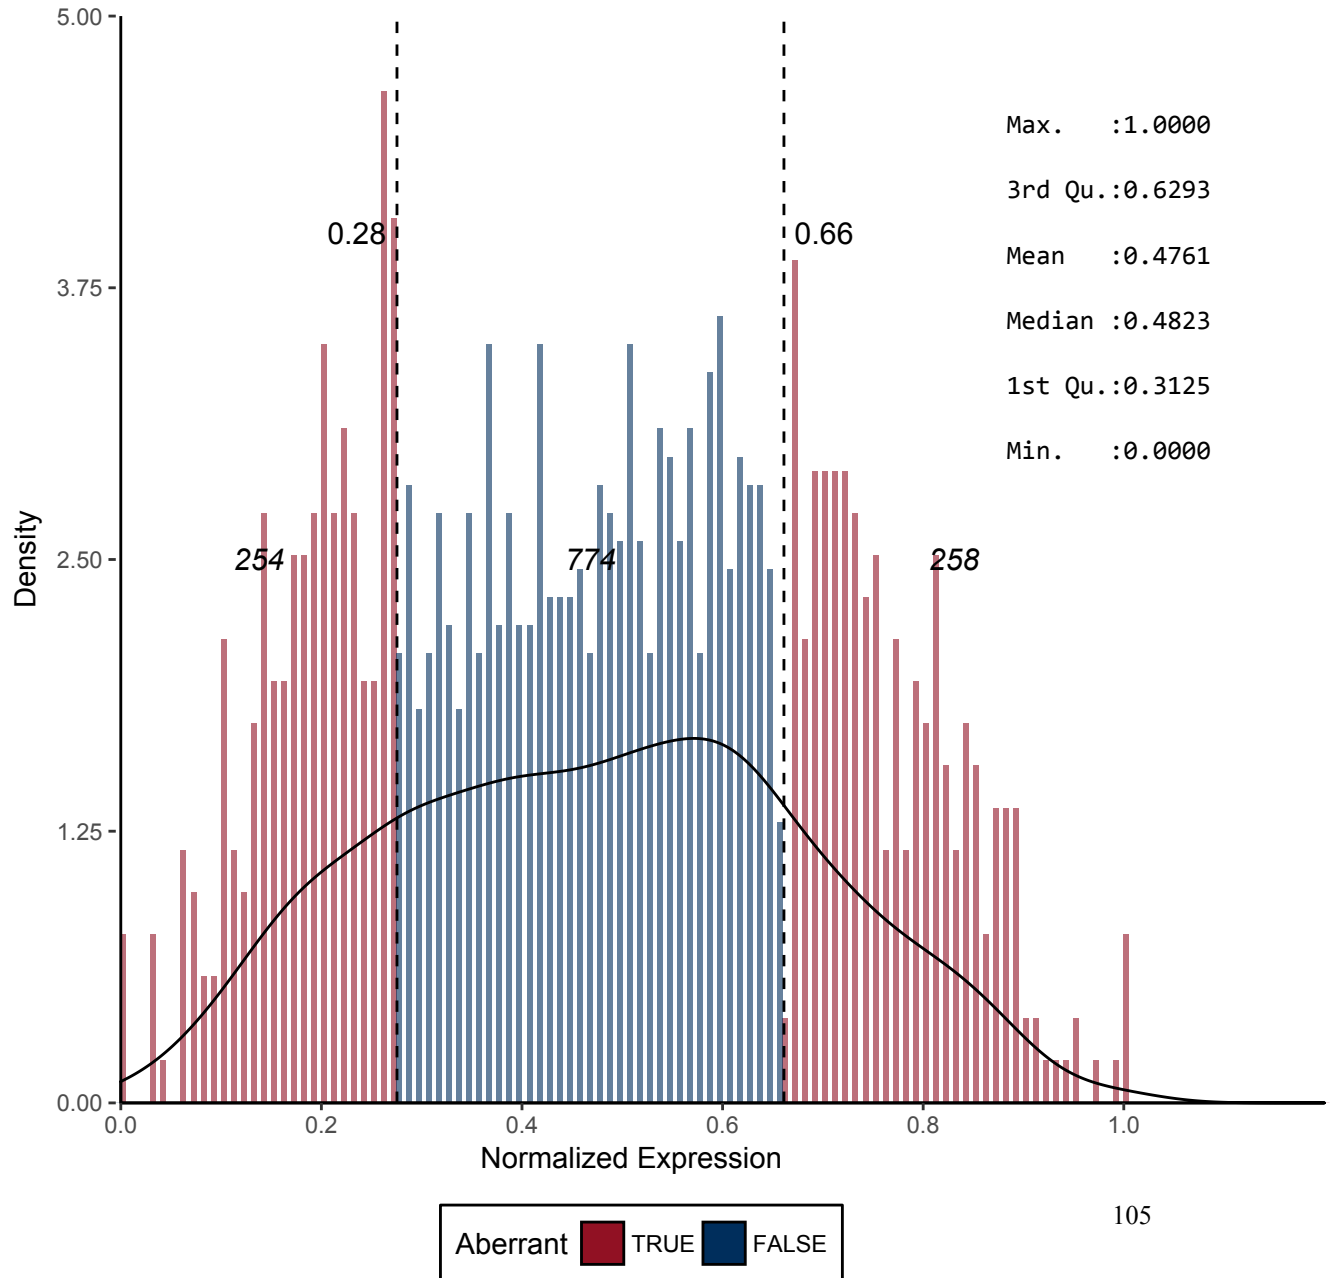

Figure 89 - CD80\*

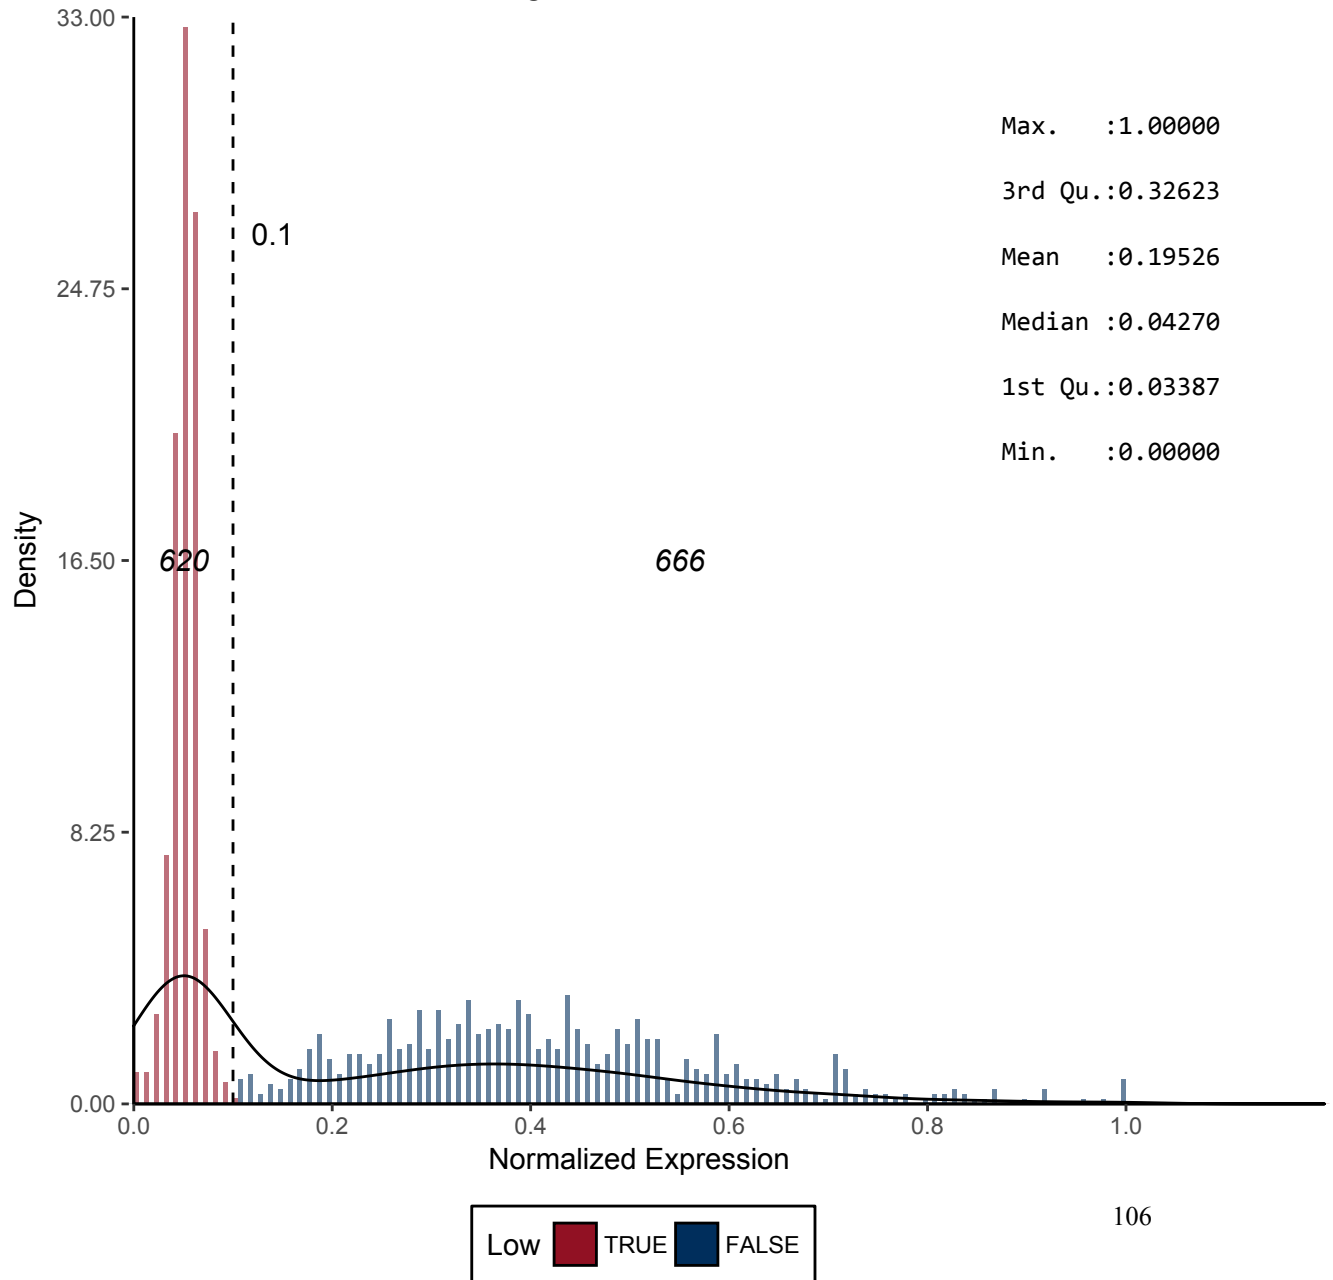

Figure 90 - CD81

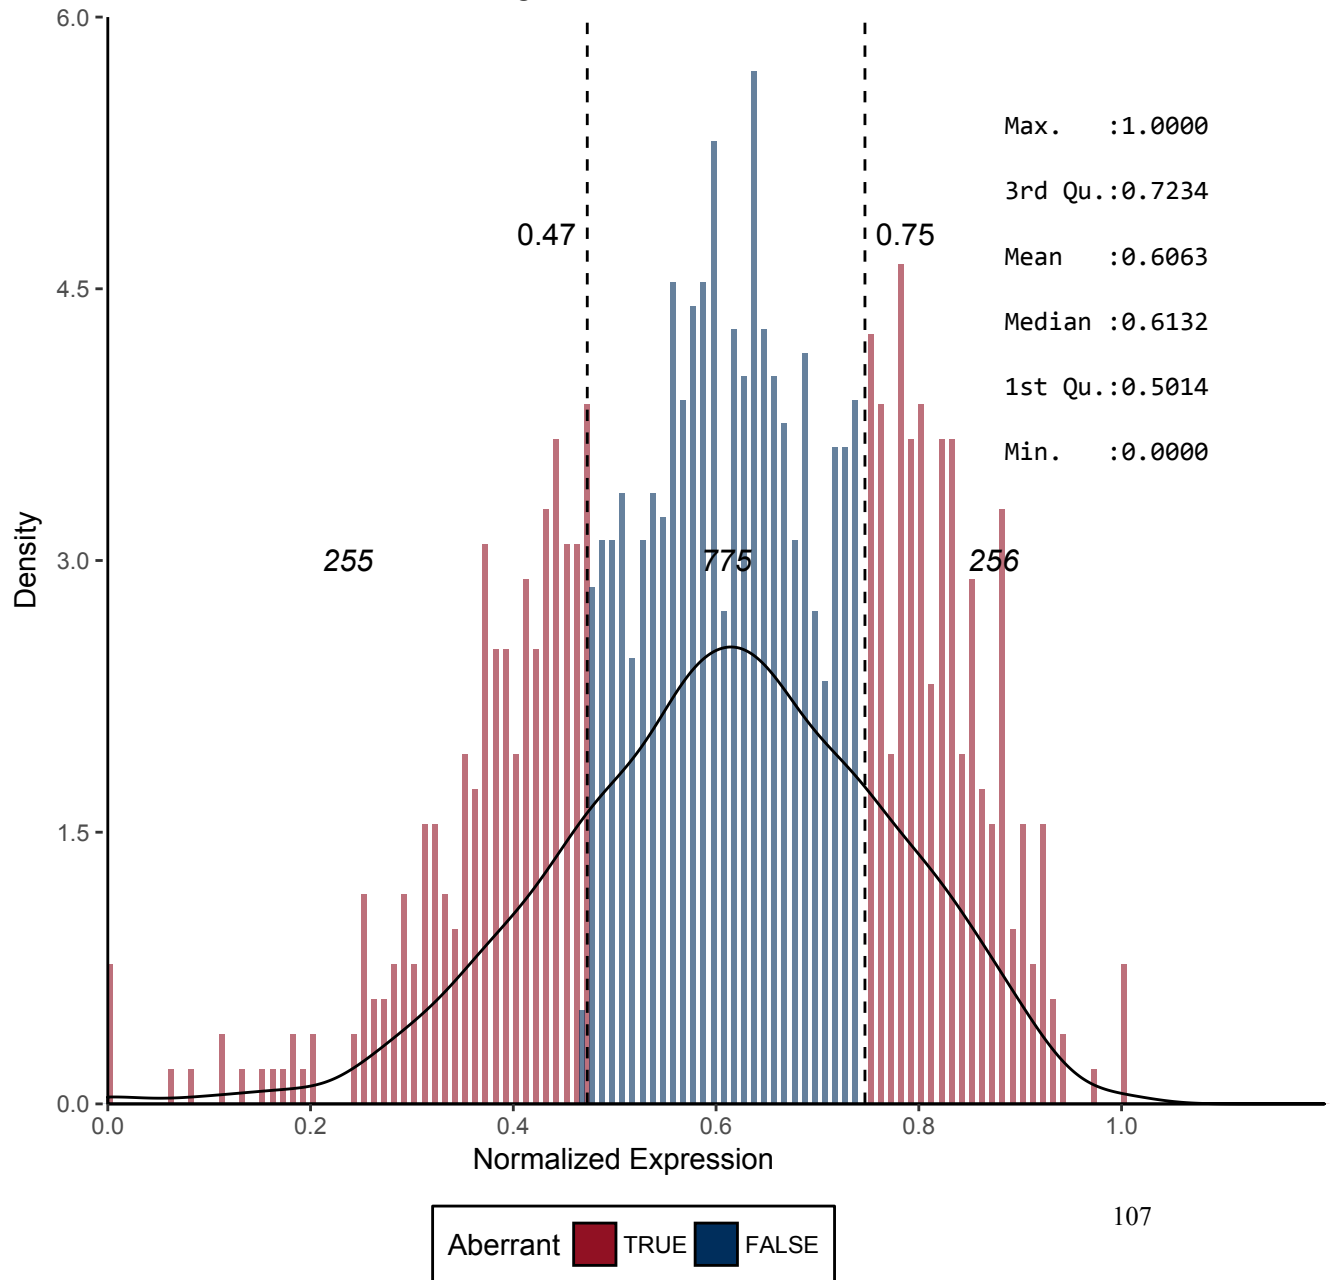

Figure 91 - CD82

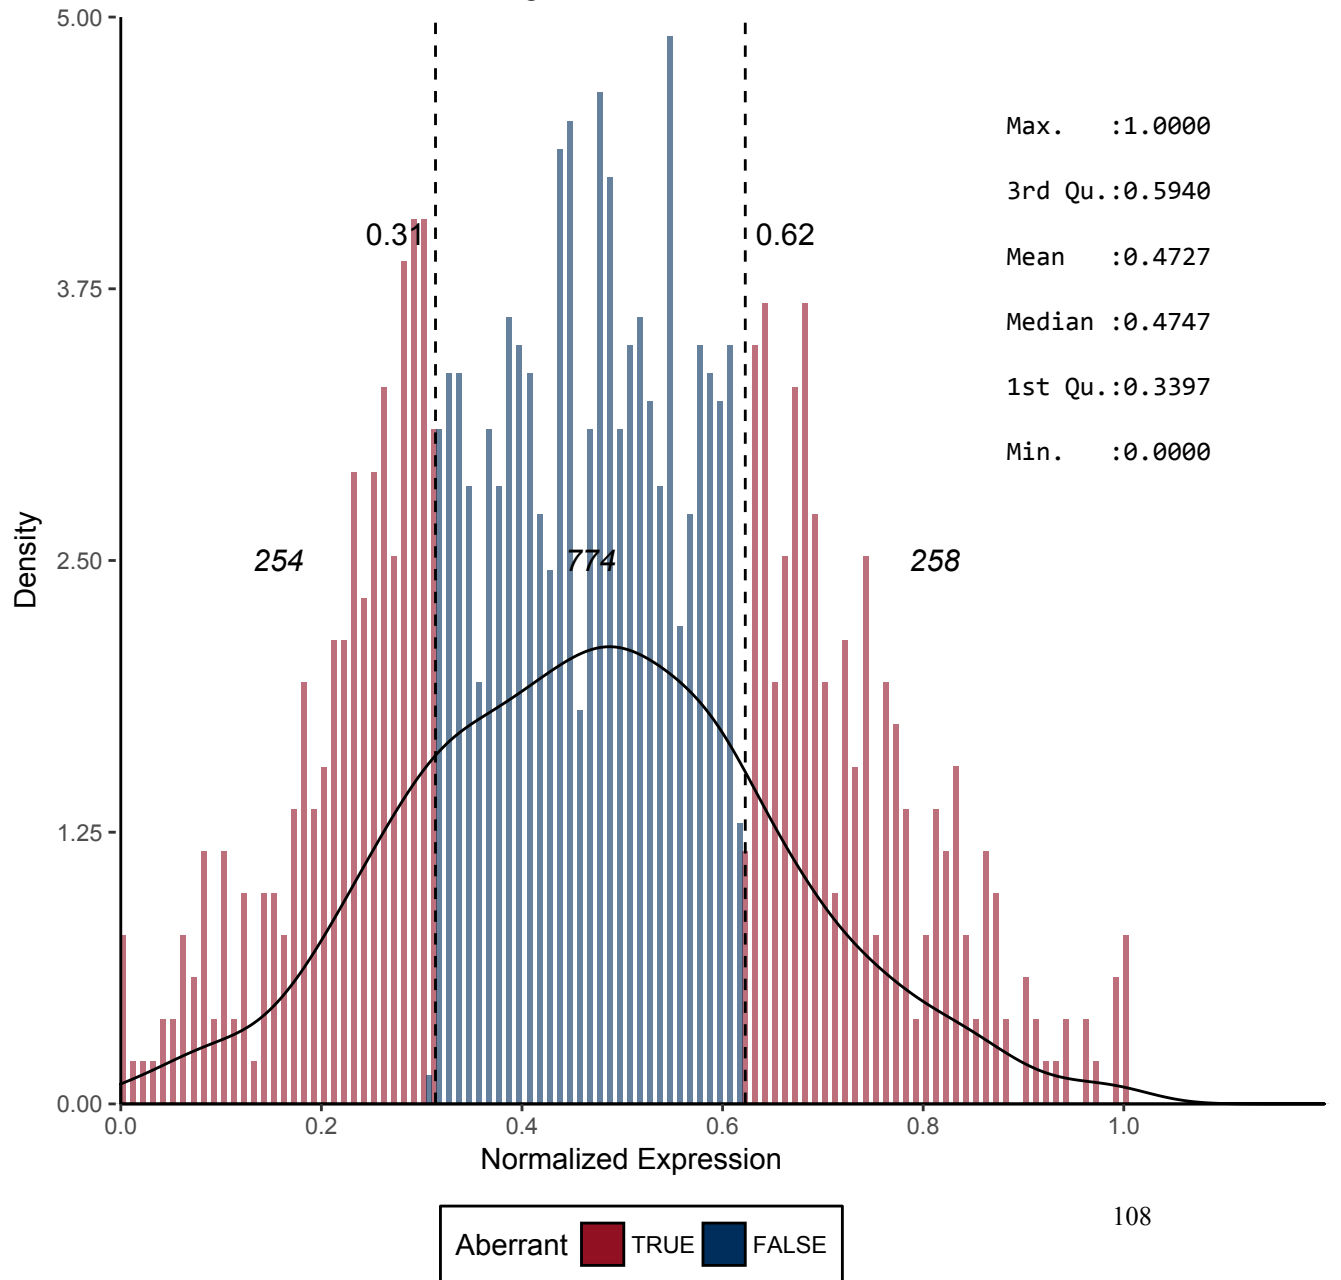

Figure 92 - CD83

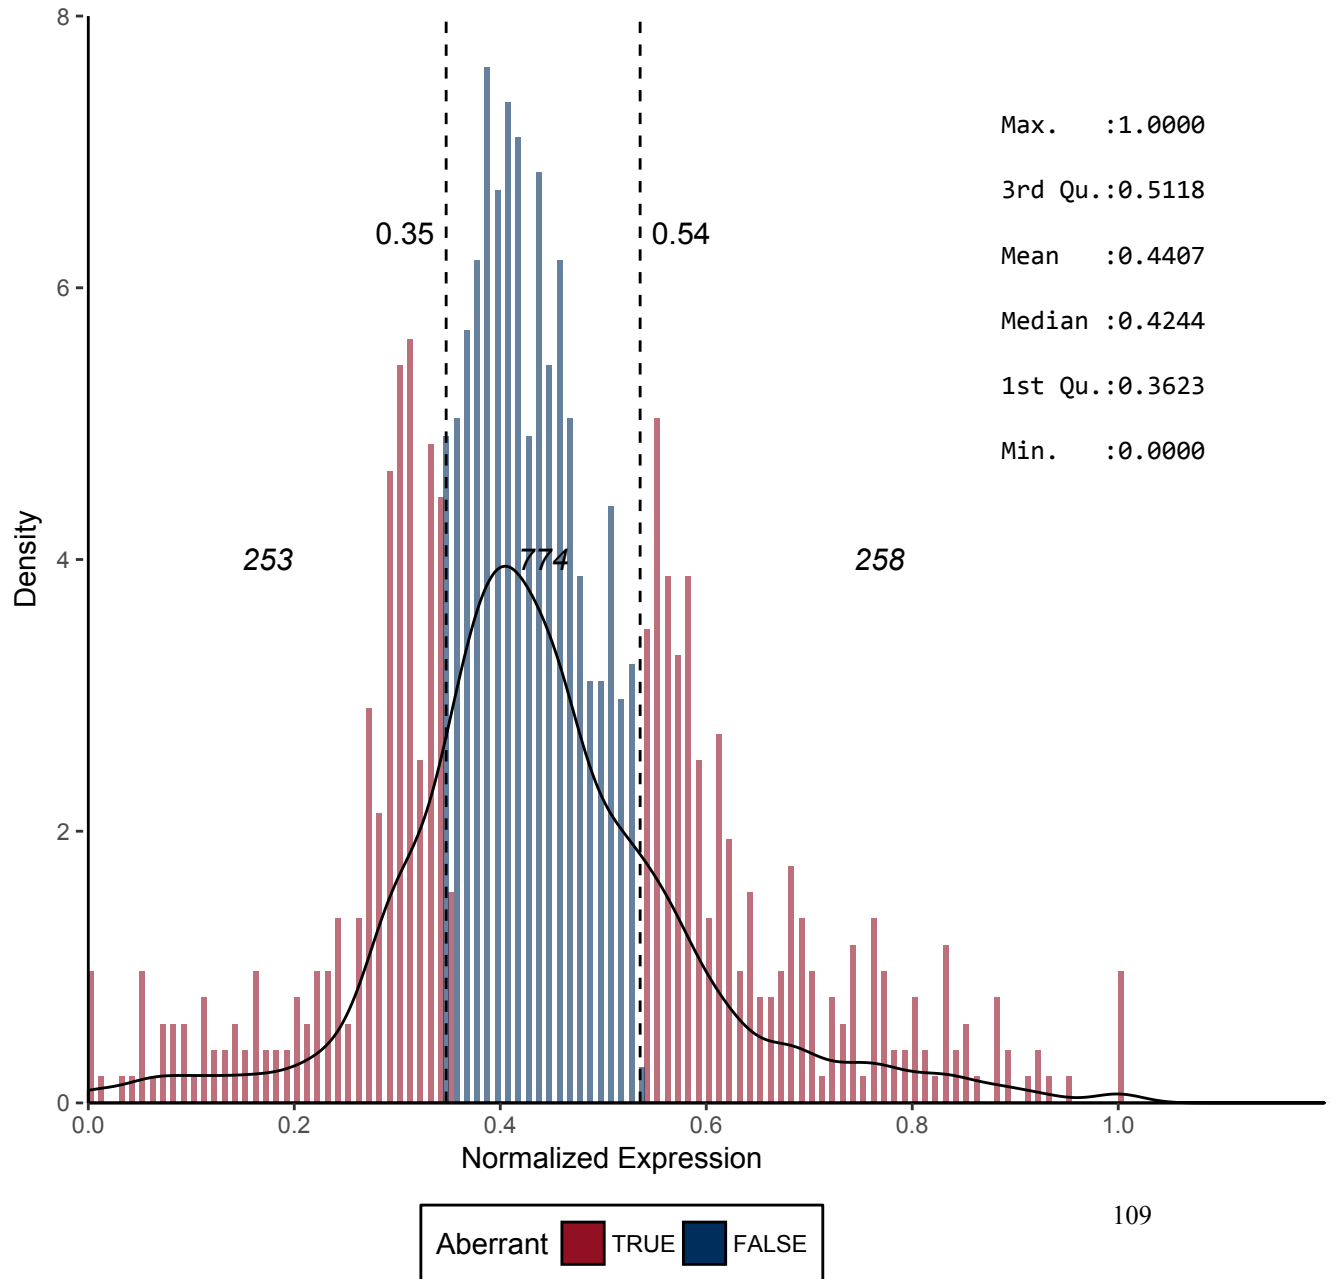

Figure 93 - CD84

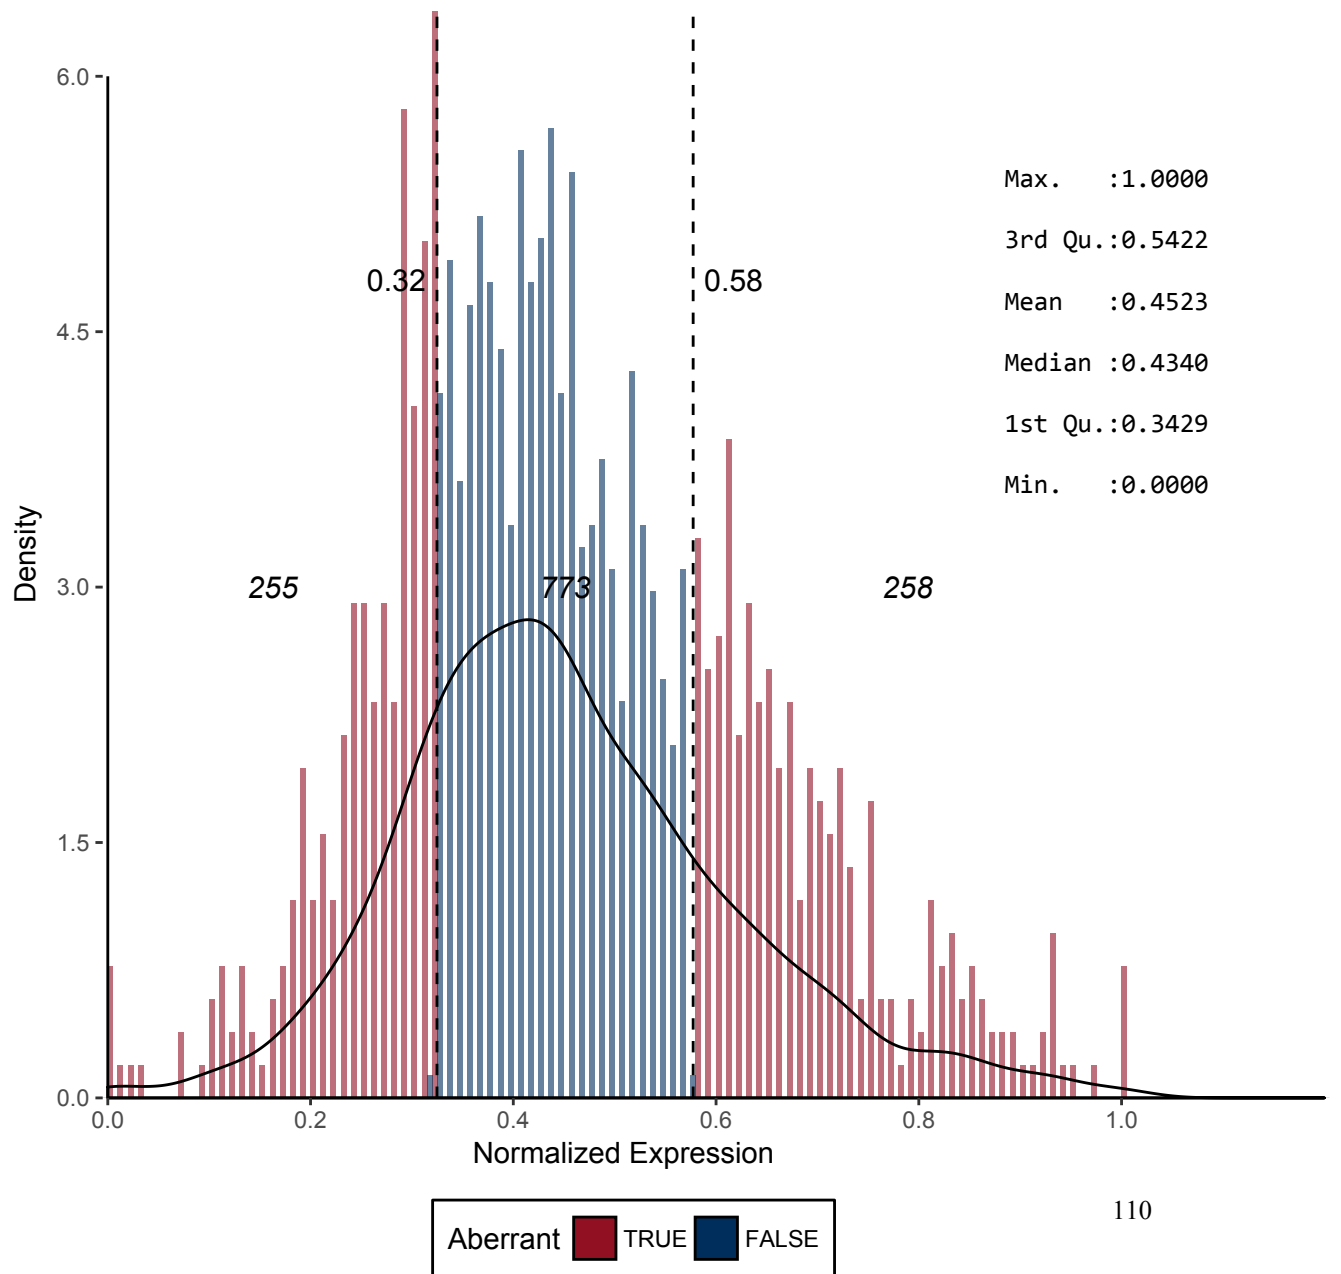

Figure 94 - CD85A

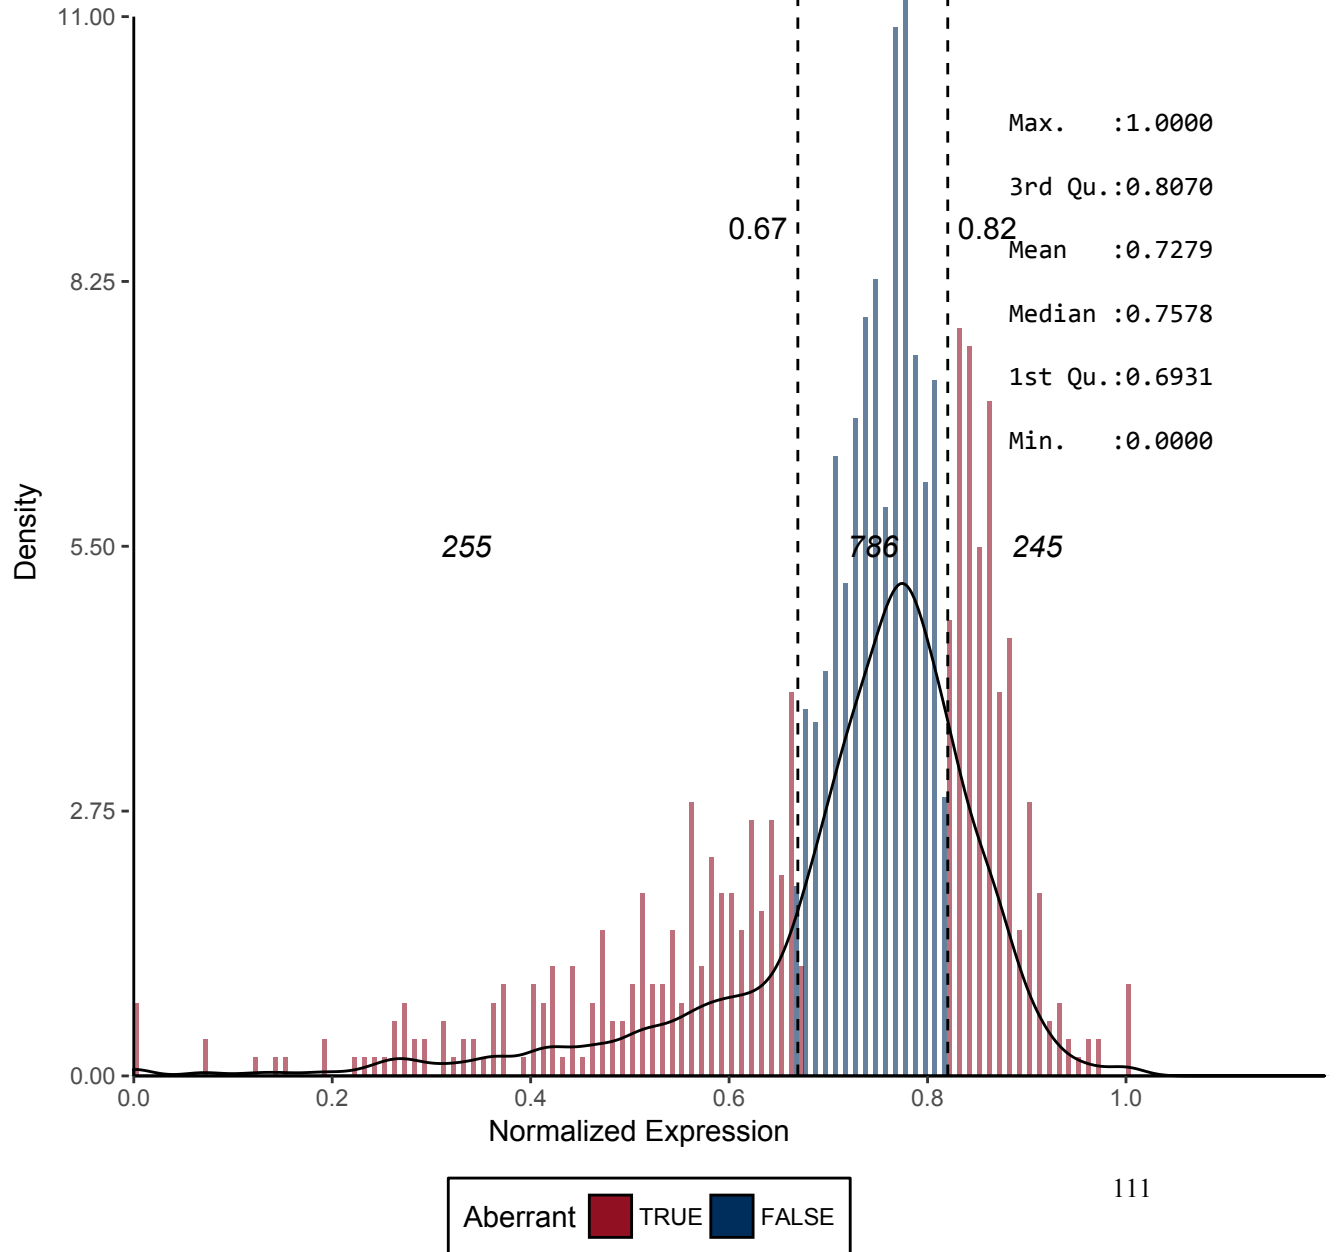

Figure 95 - CD85C\*

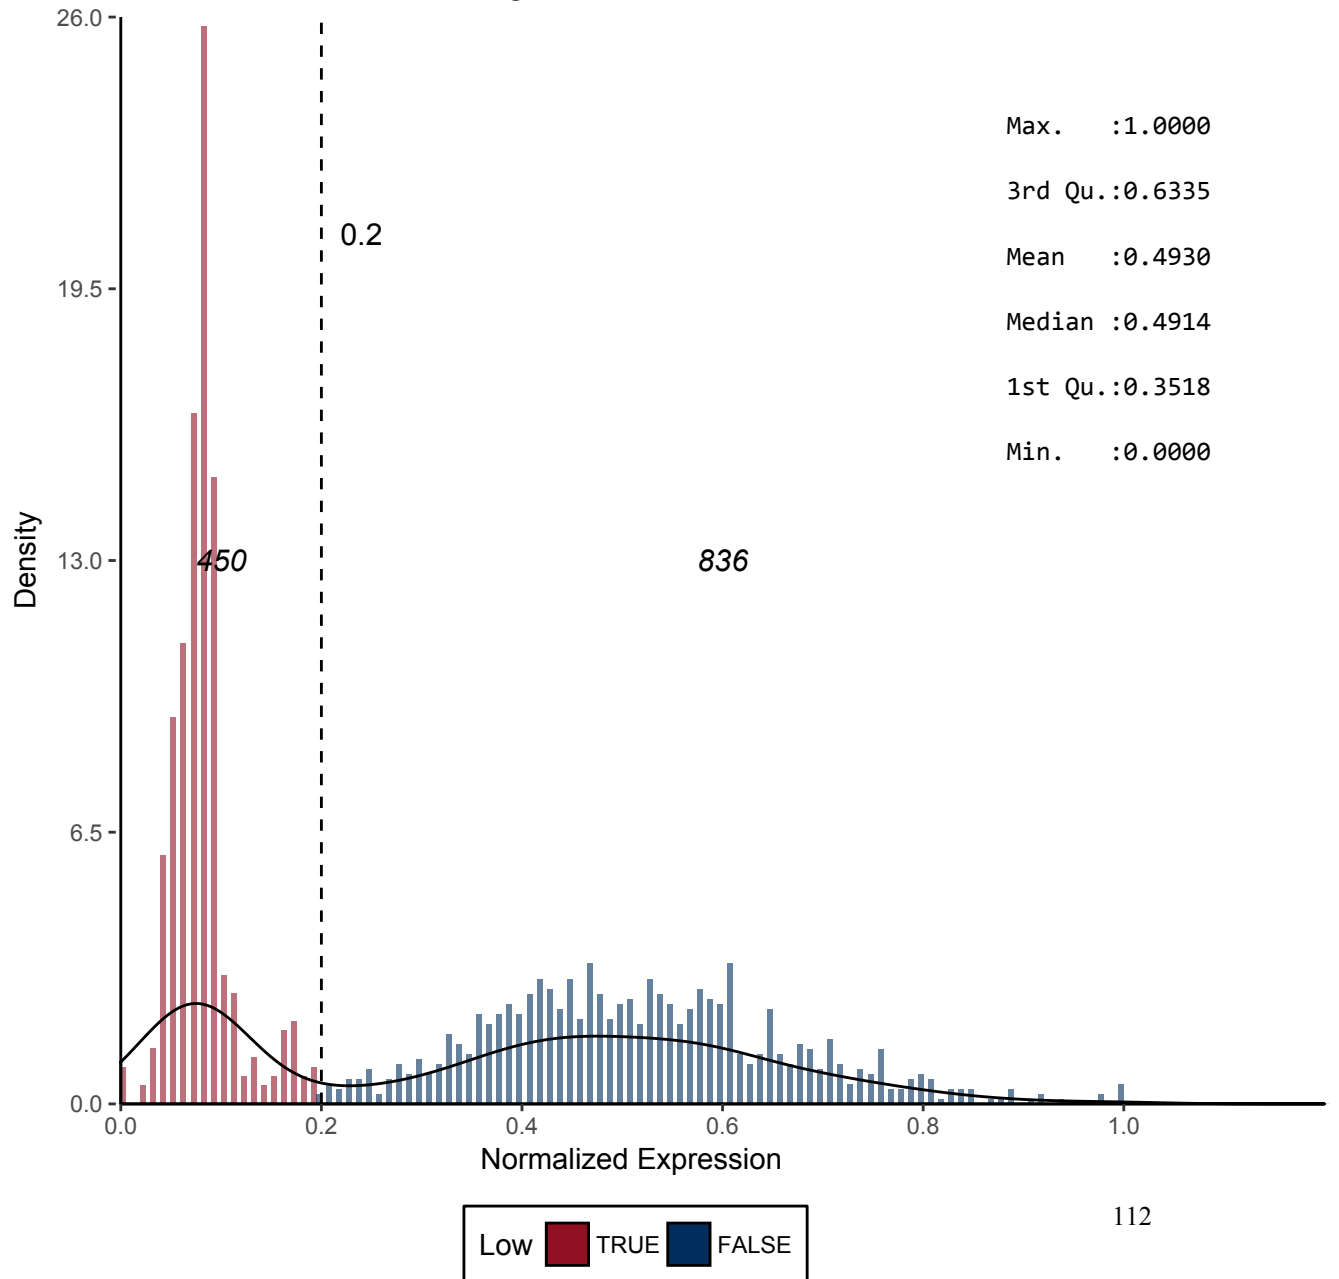



Figure 96 - CD85D

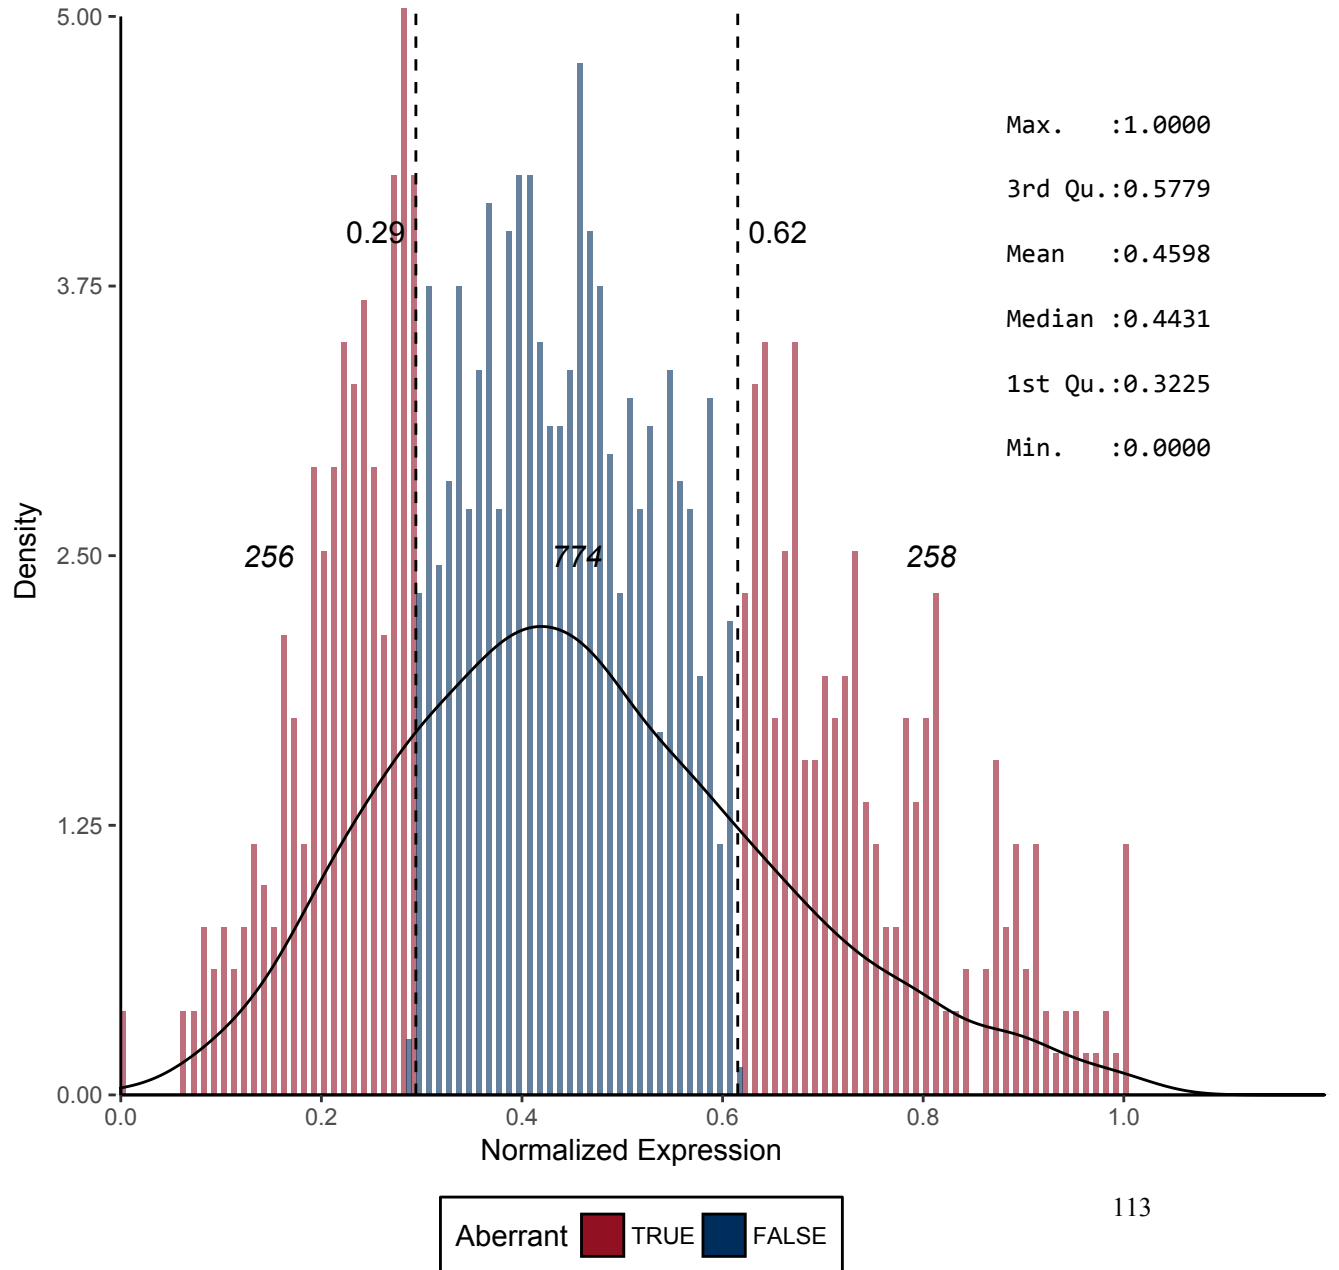

Figure 97 - CD85F

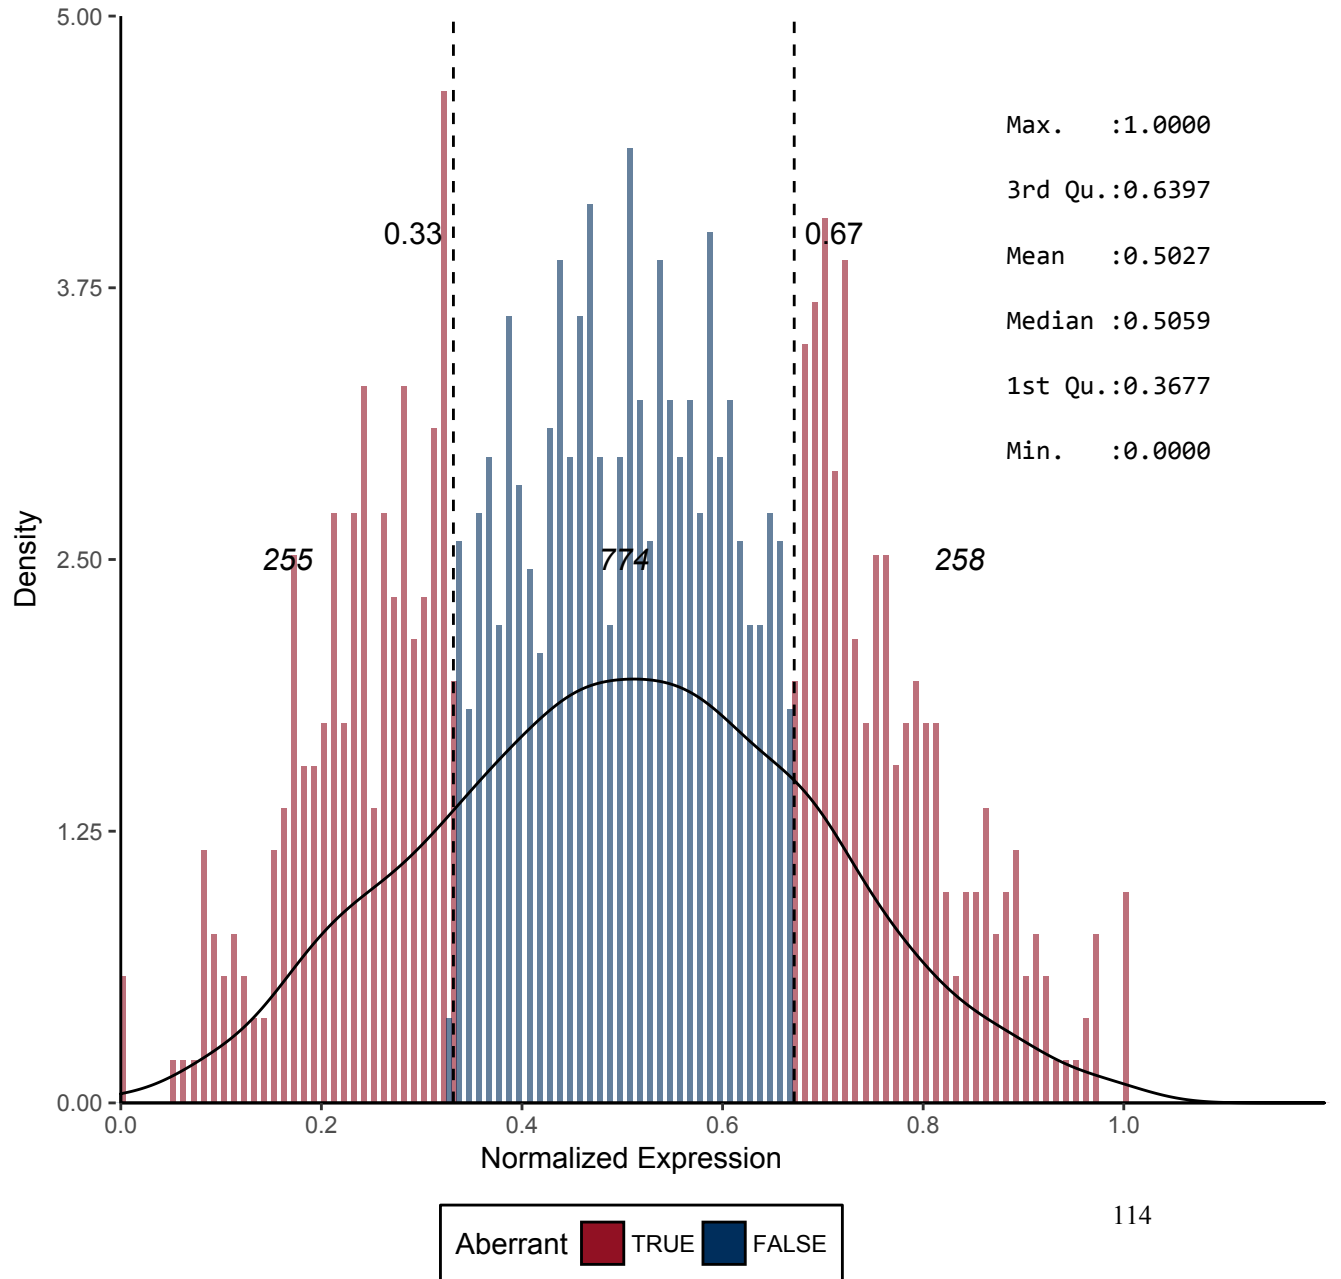

Figure 98 - CD85G

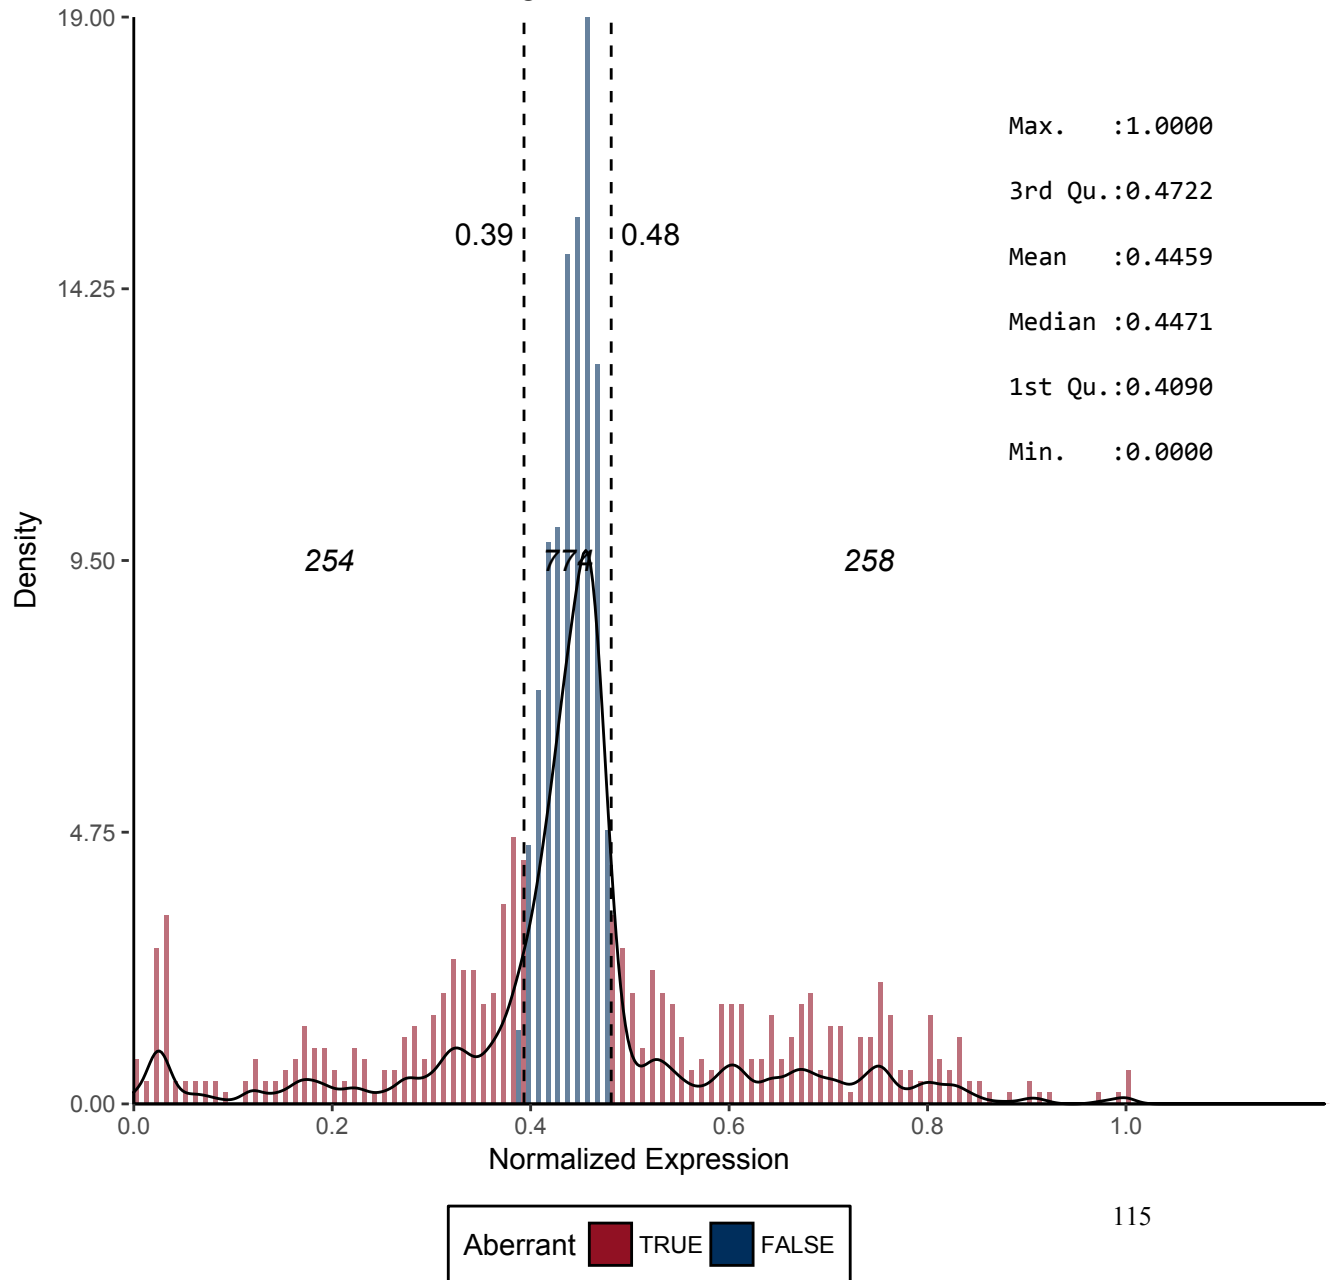

Figure 99 - CD85H

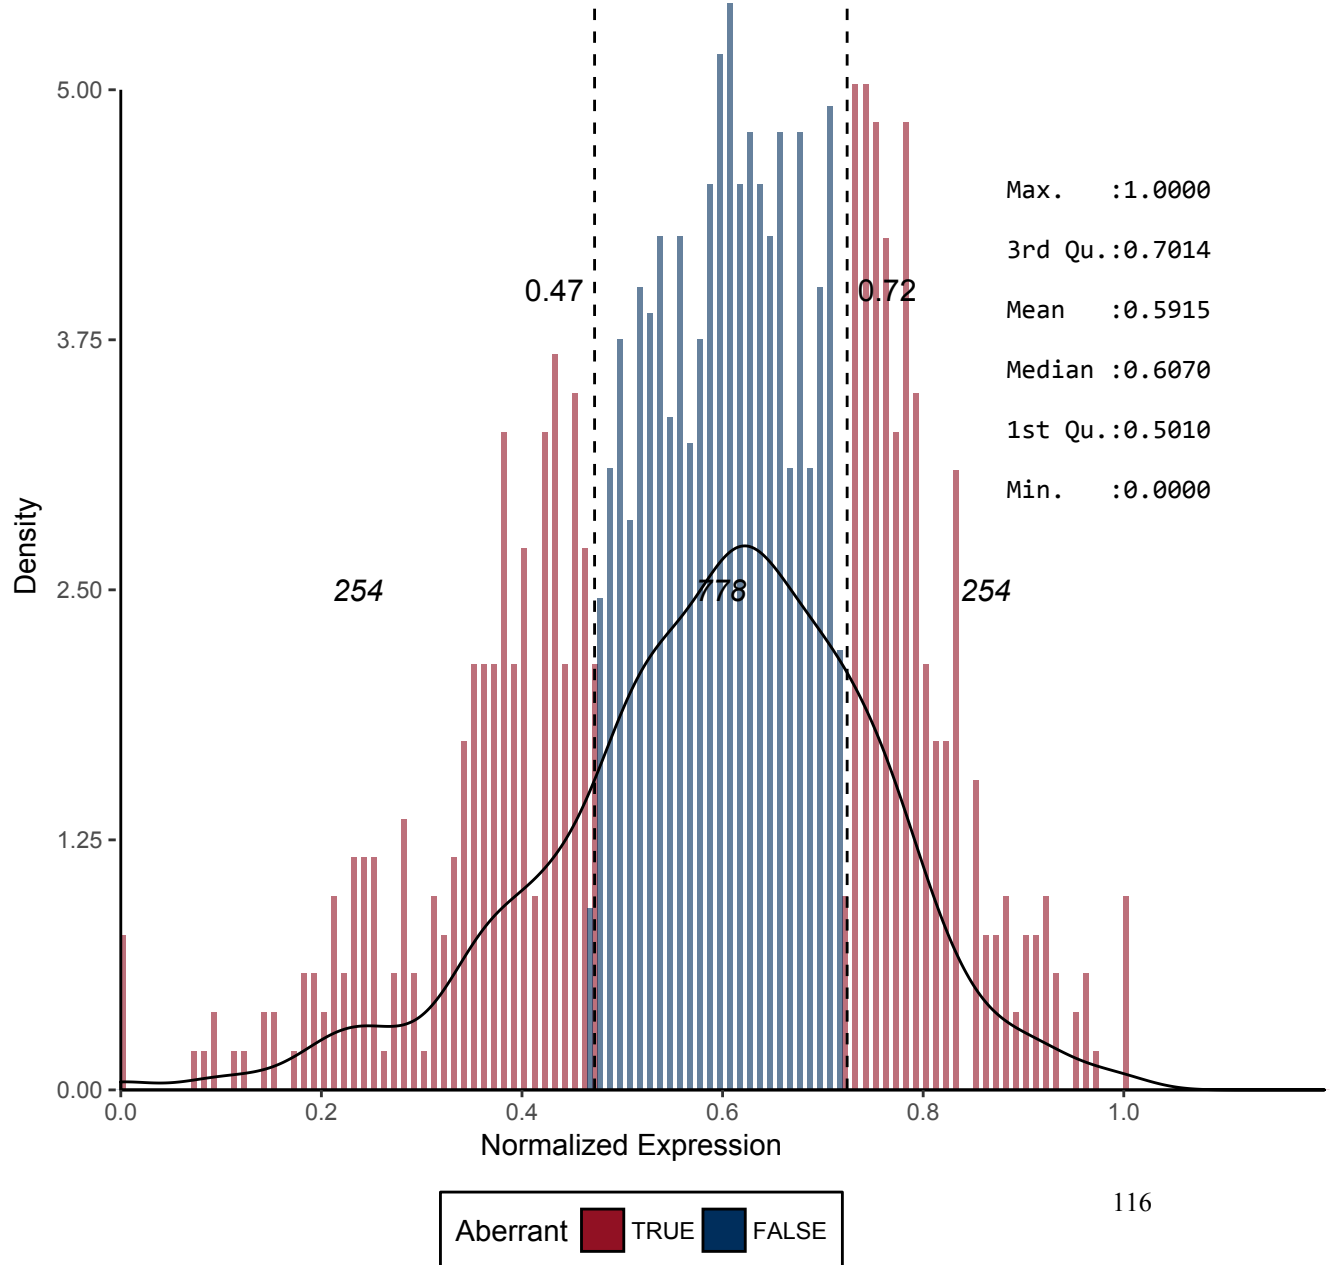

Figure 100 - CD85J

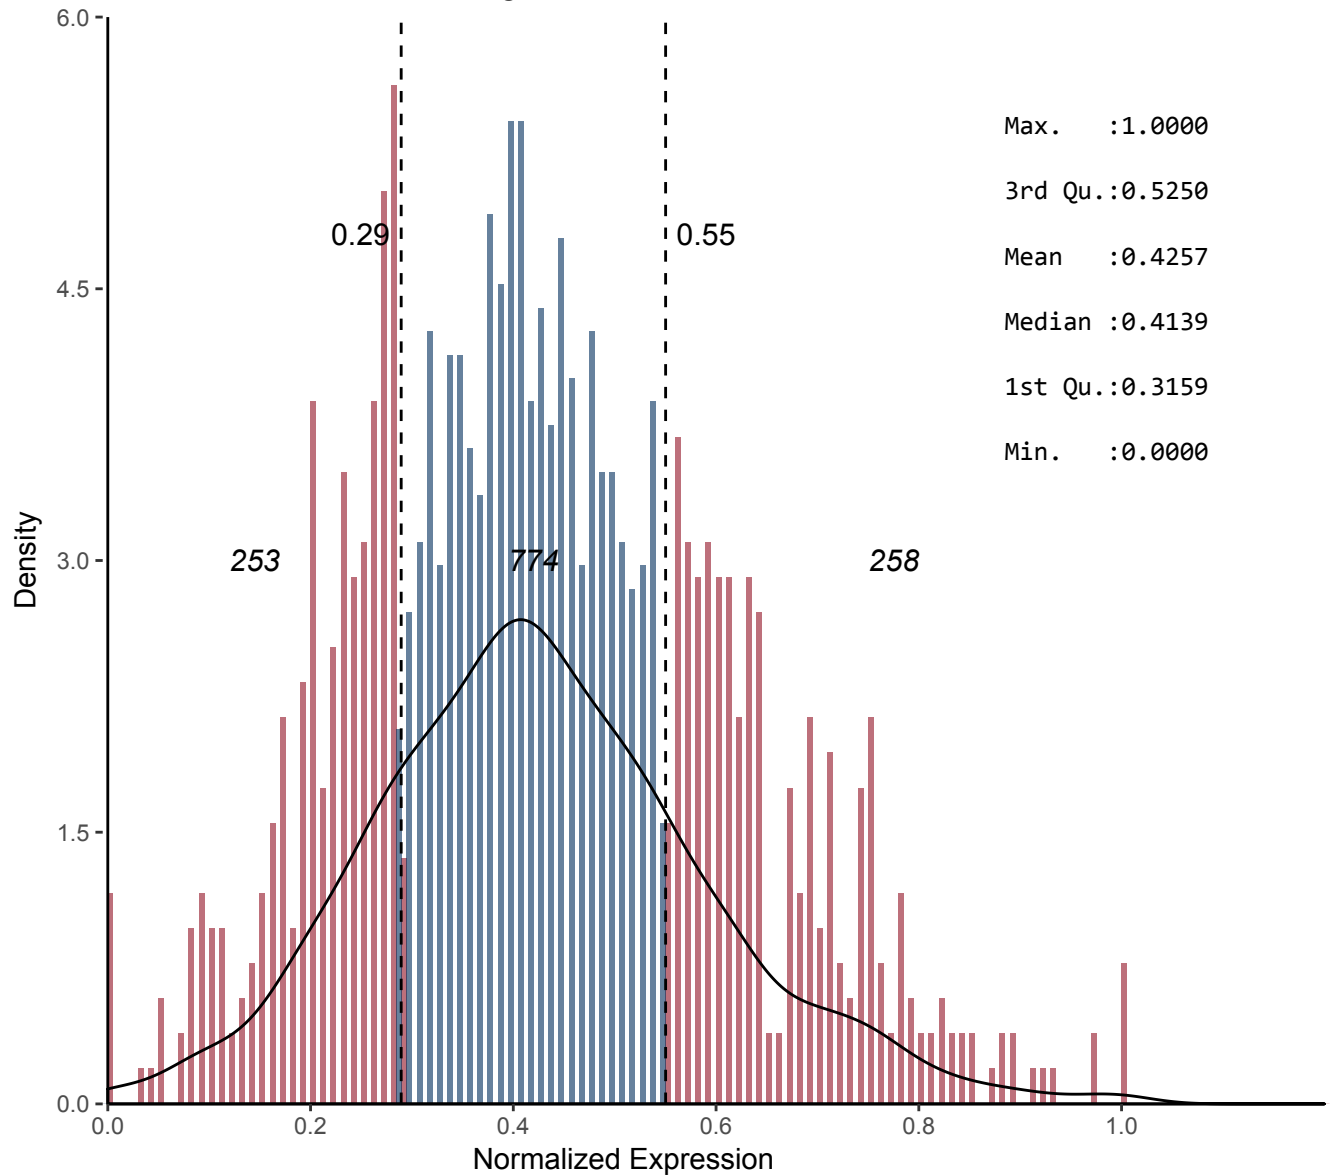

Aberrant TRUE FALSE

Figure 101 - CD85K

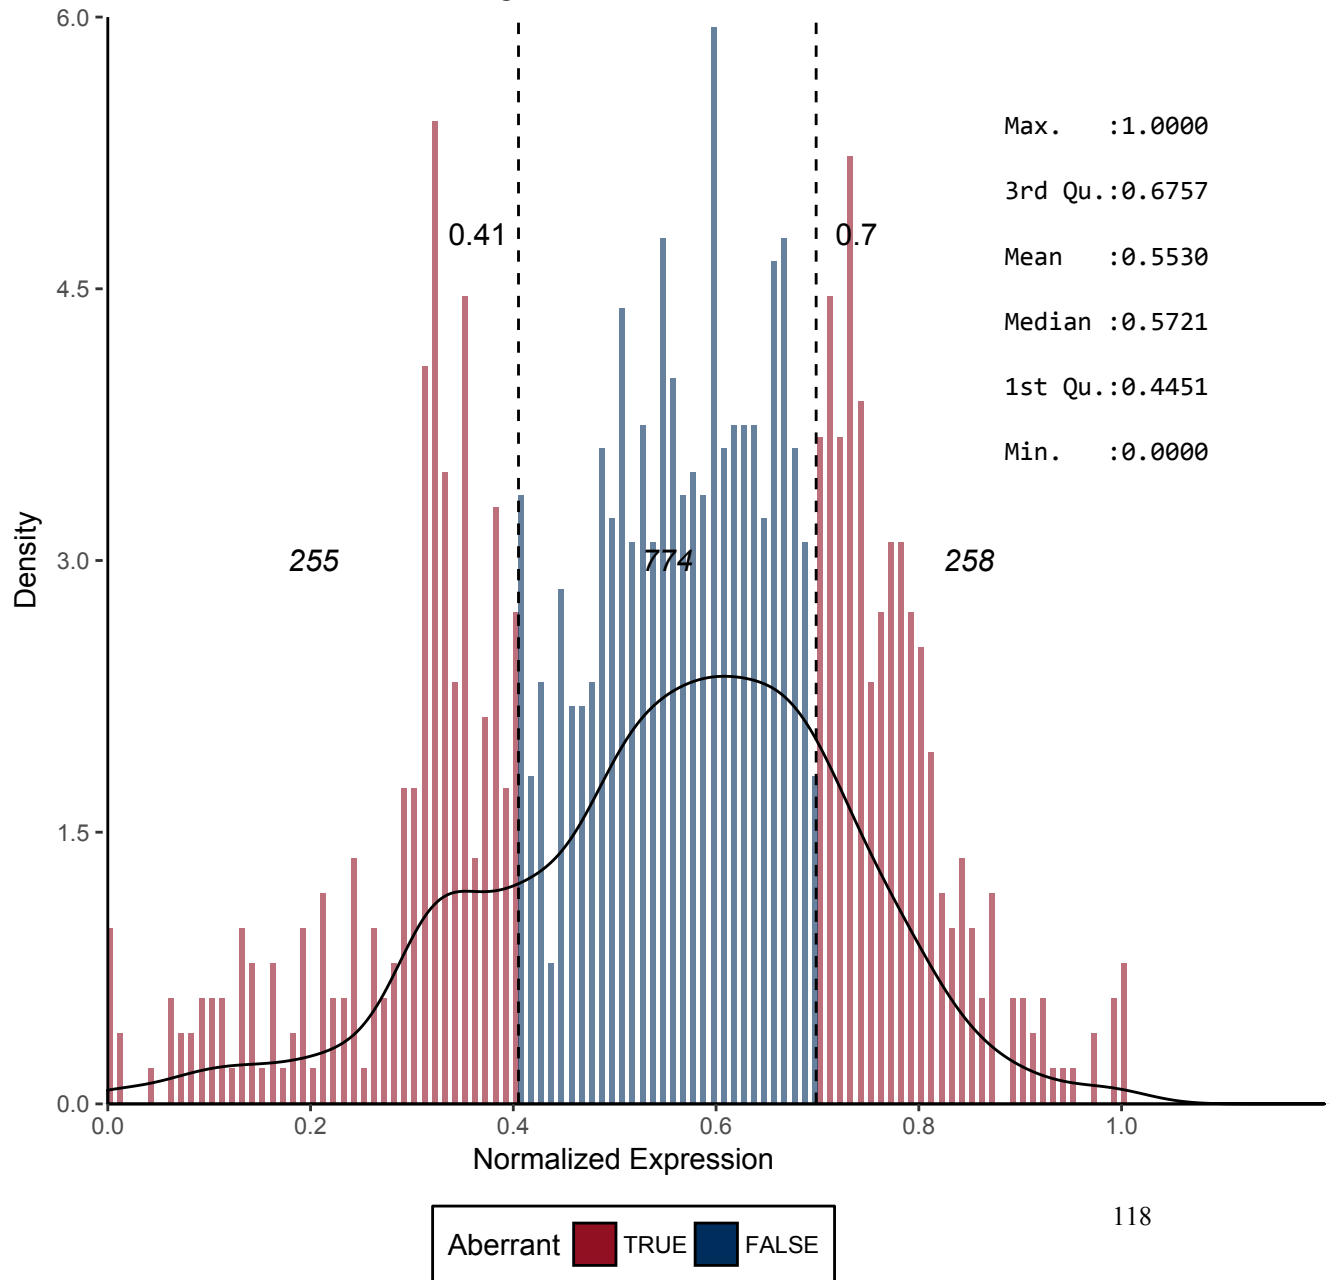

Figure 102 - CD85M\*

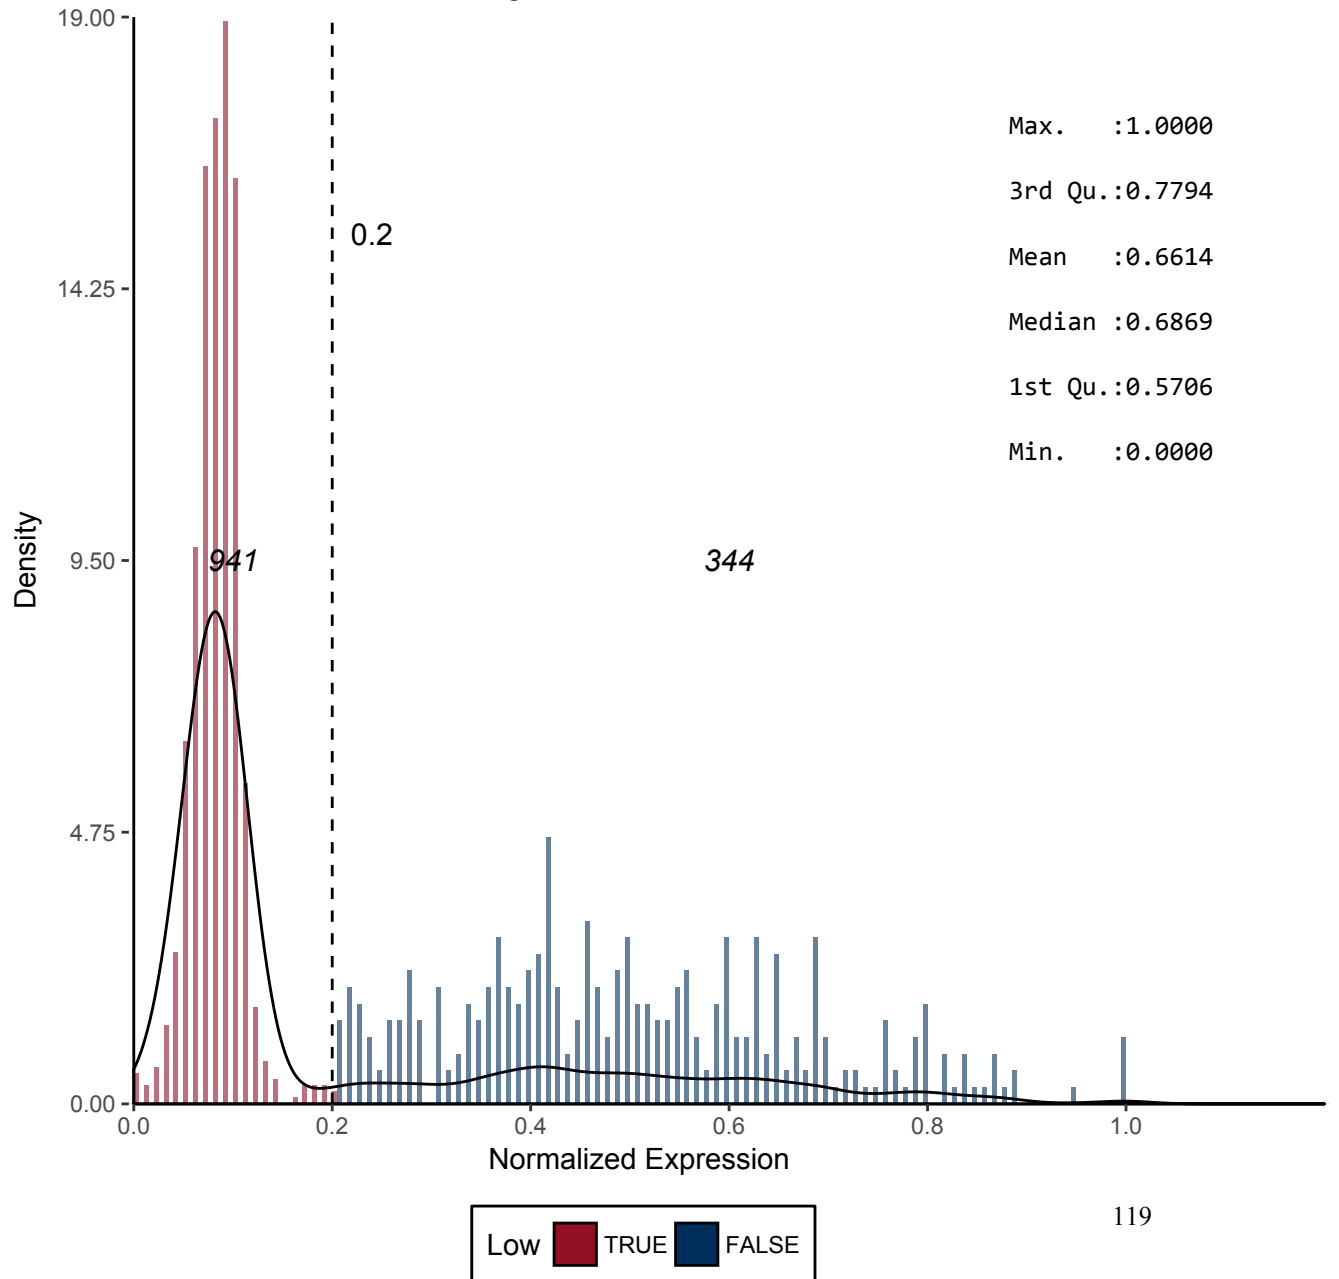

Figure 103 - CD86

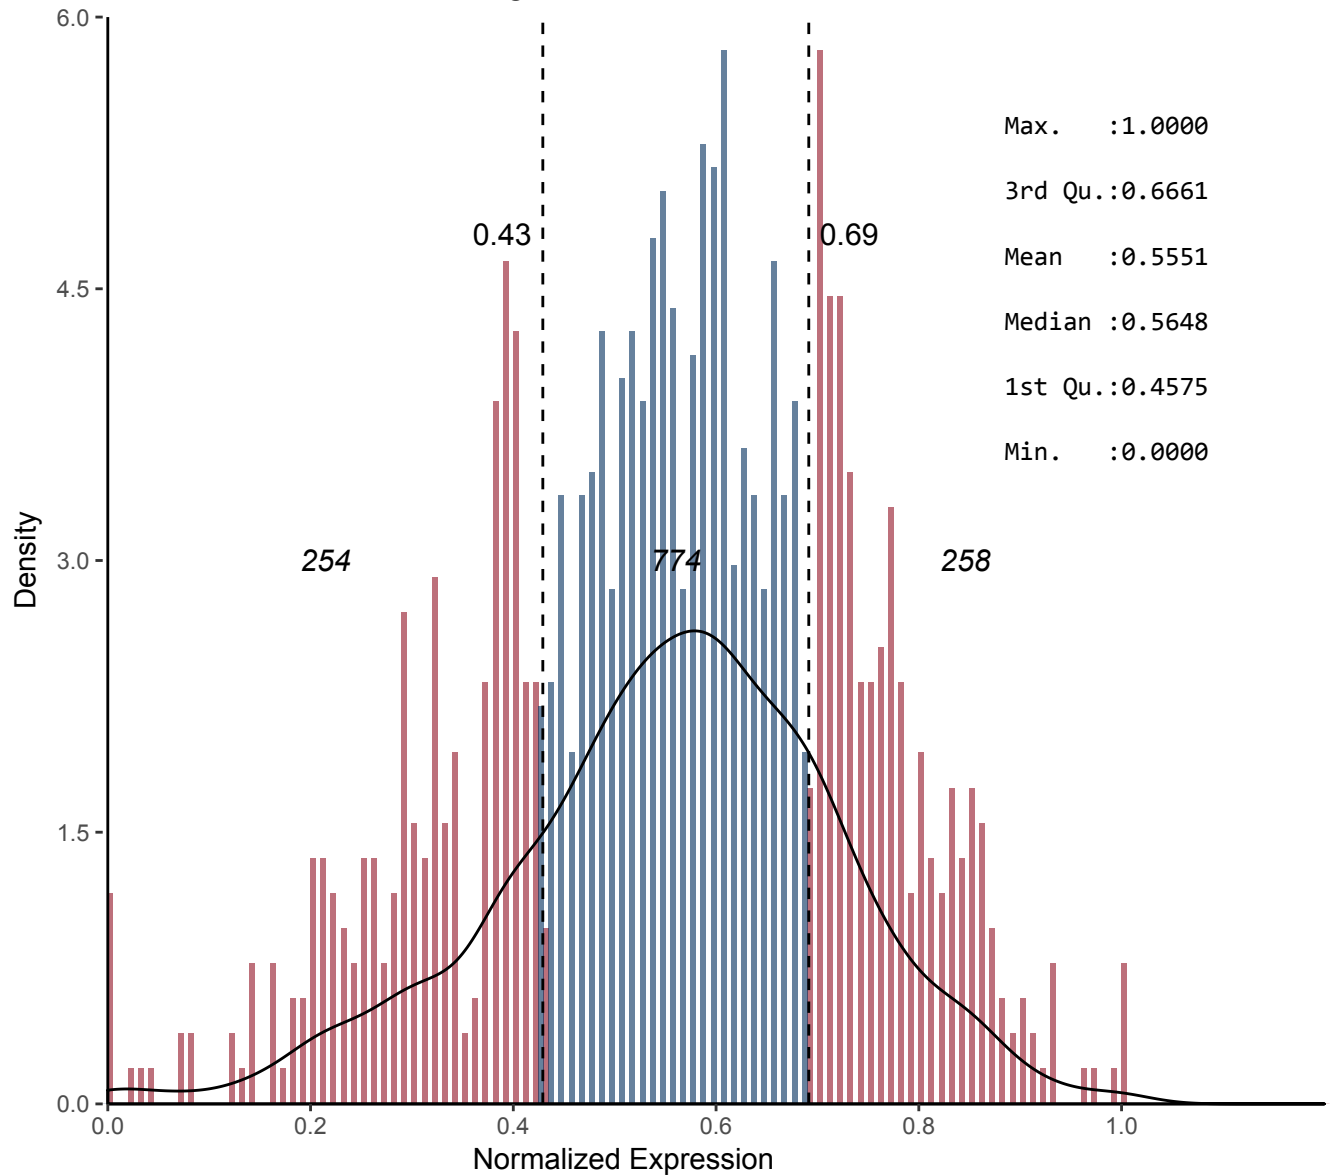

Aberrant TRUE FALSE



Figure 104 - CD87

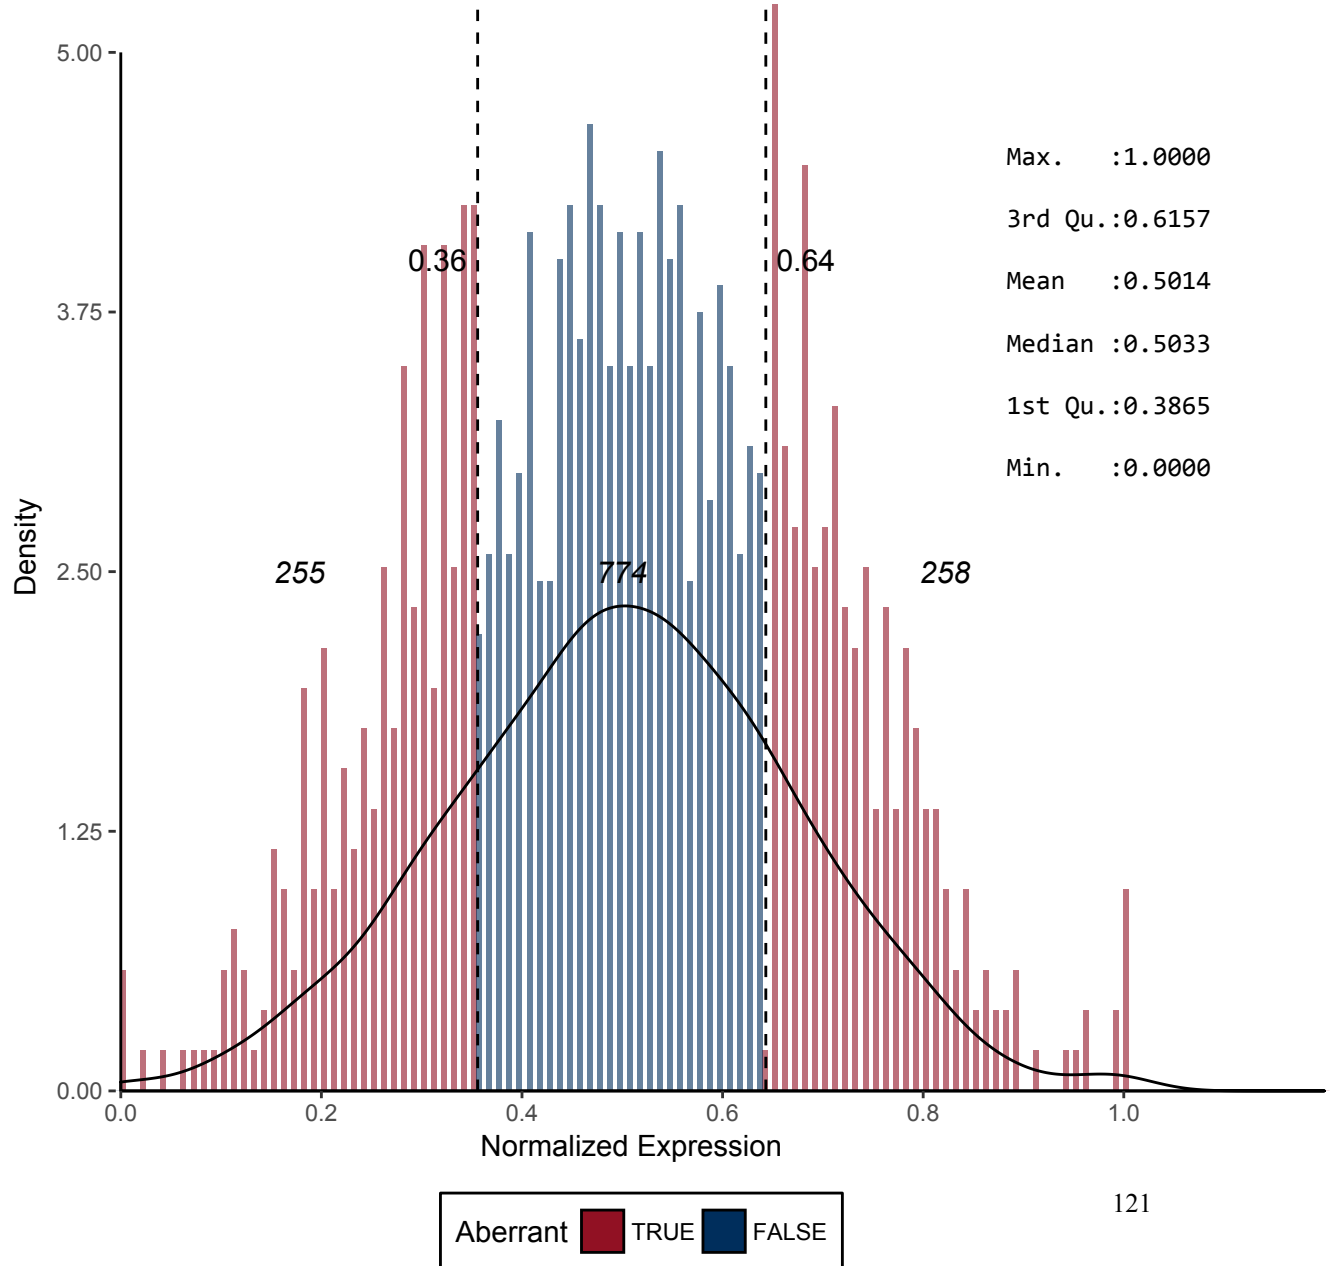

Figure 105 - CD88

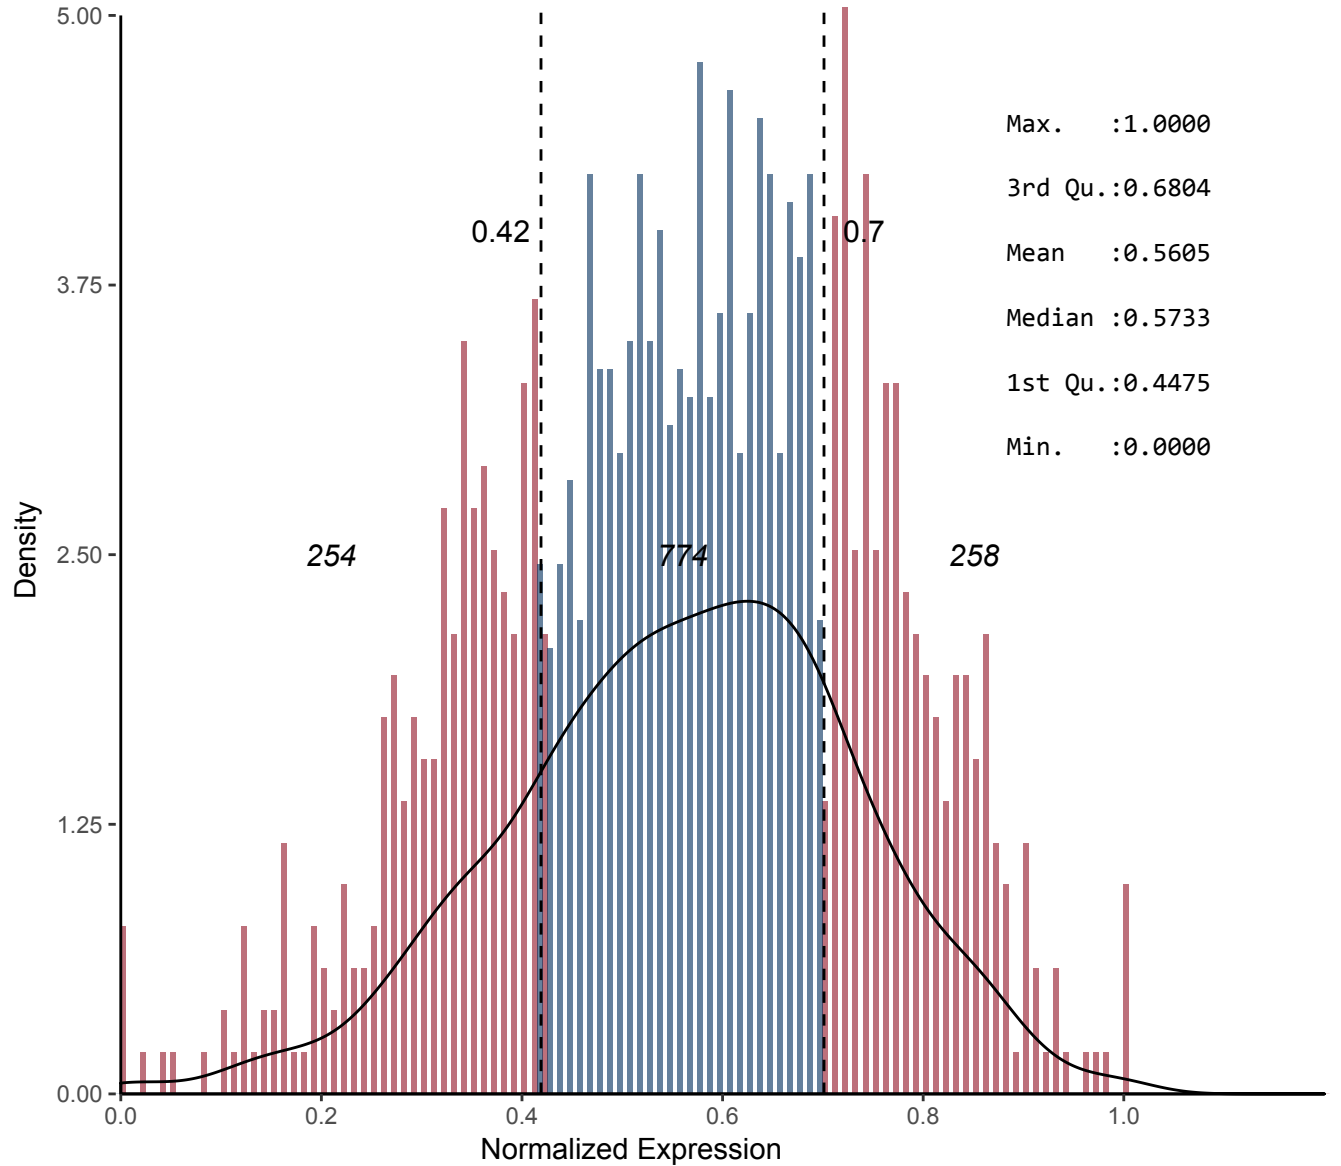

Aberrant TRUE FALSE

Figure 106 - CD89

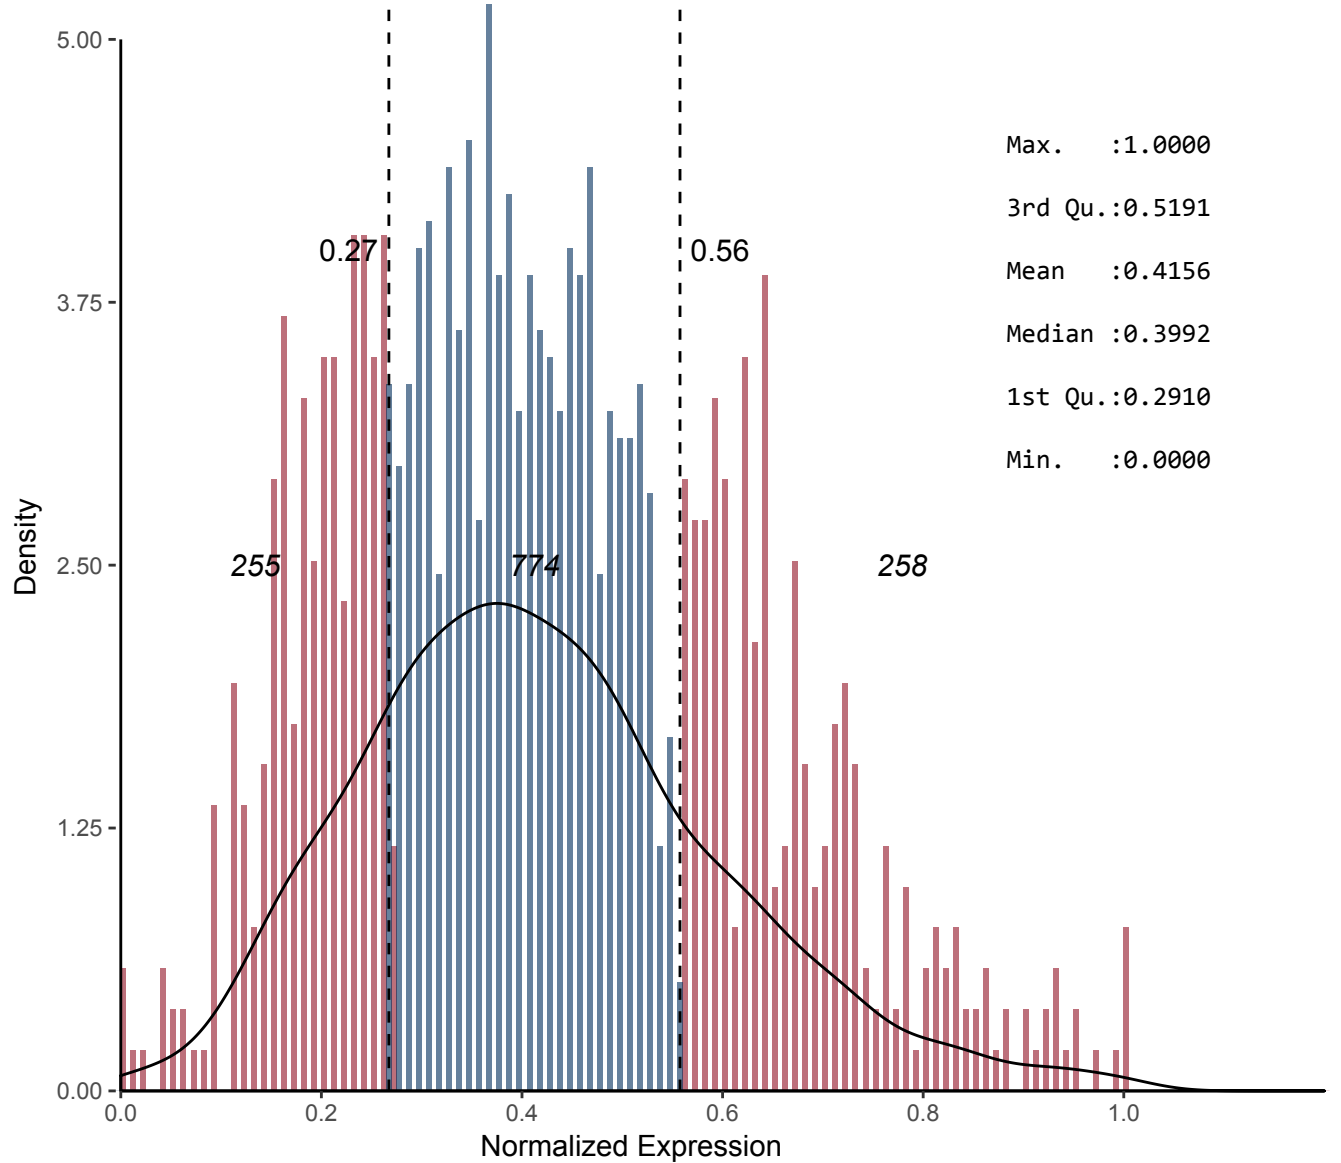

Aberrant TRUE FALSE

Figure 107 - CD90

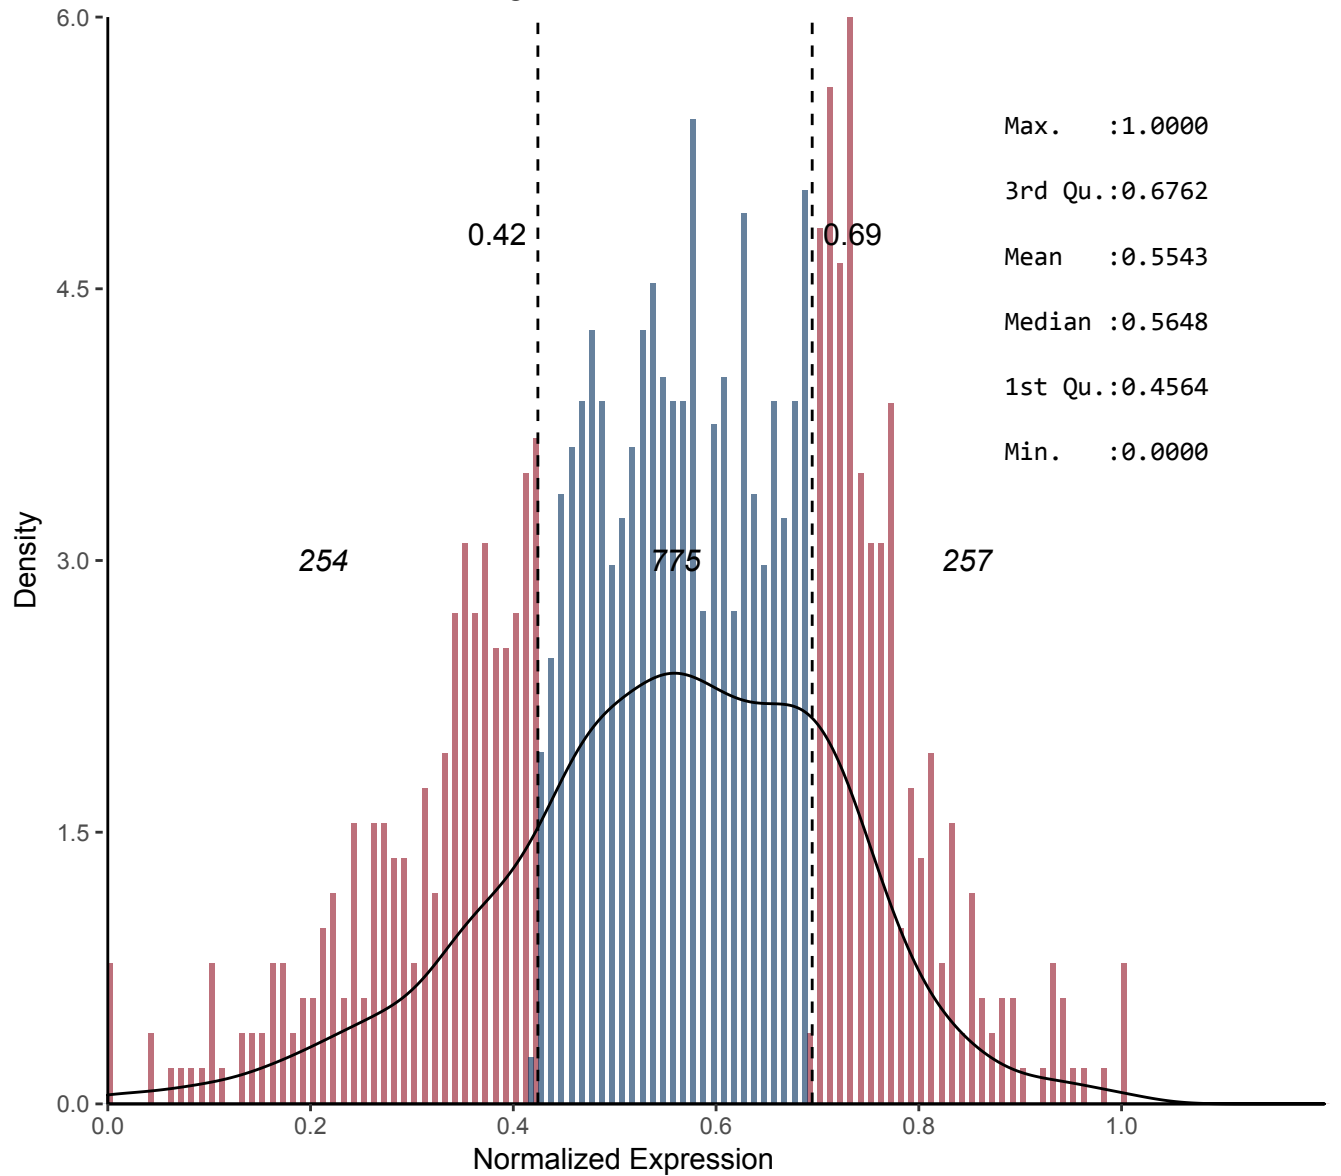

Aberrant TRUE FALSE

Figure 108 - CD91\*

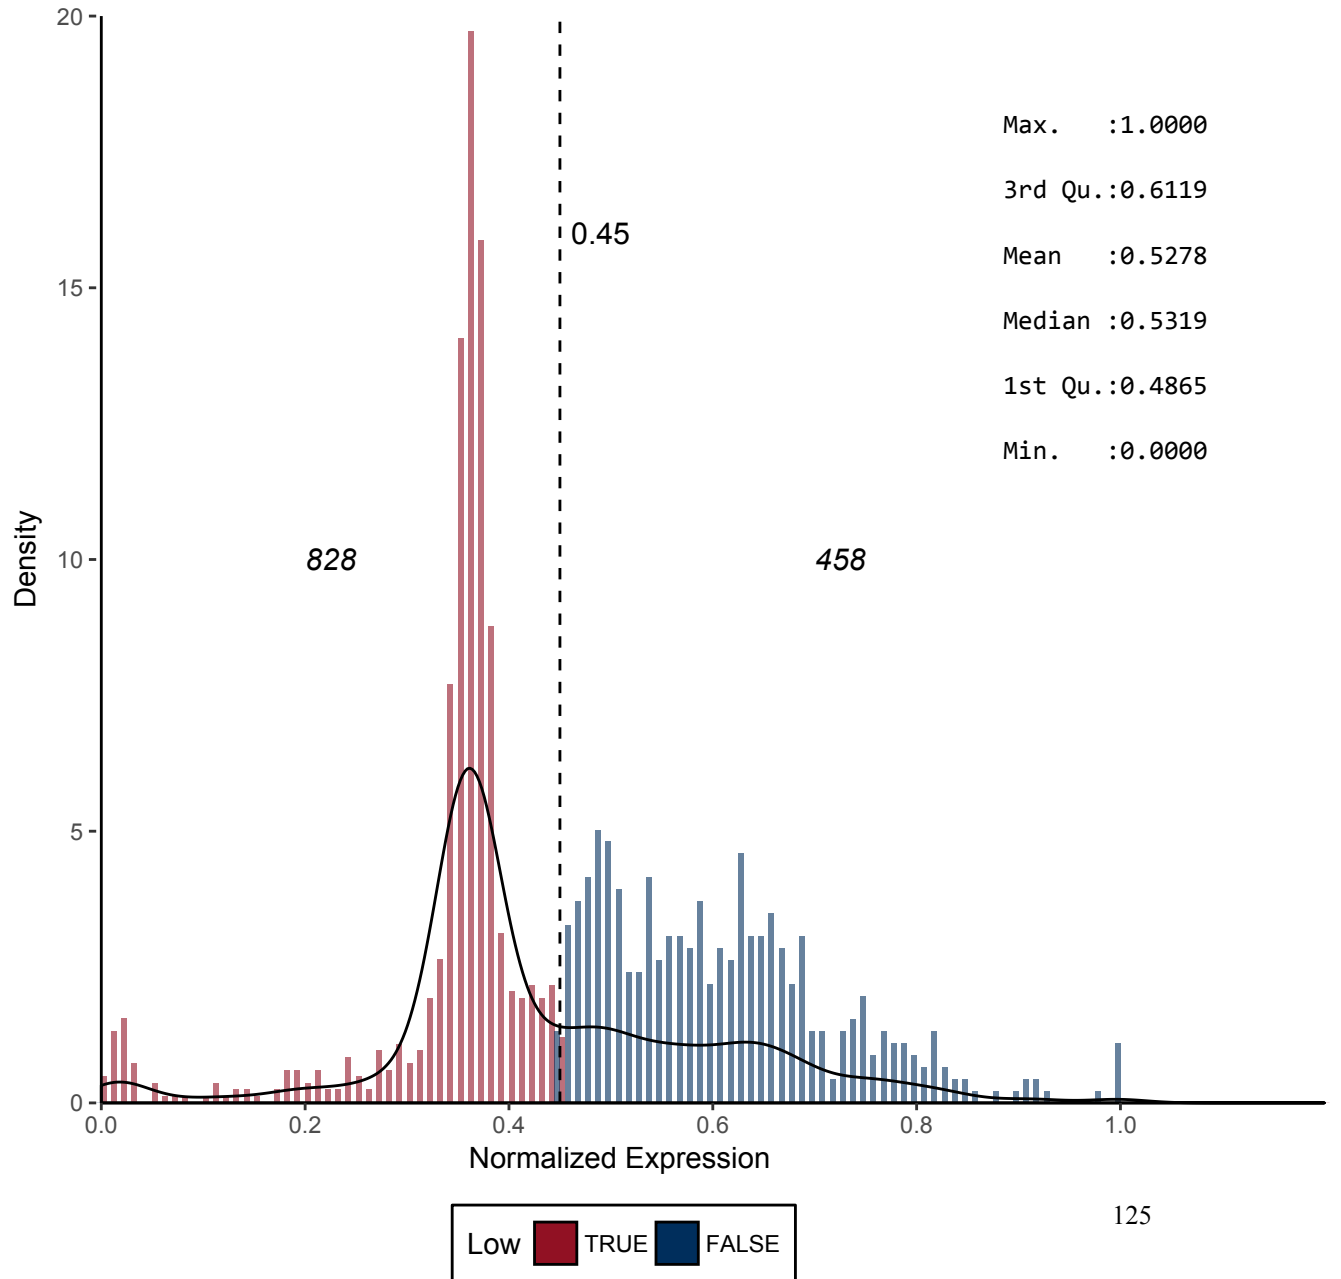

Figure 109 - CD92

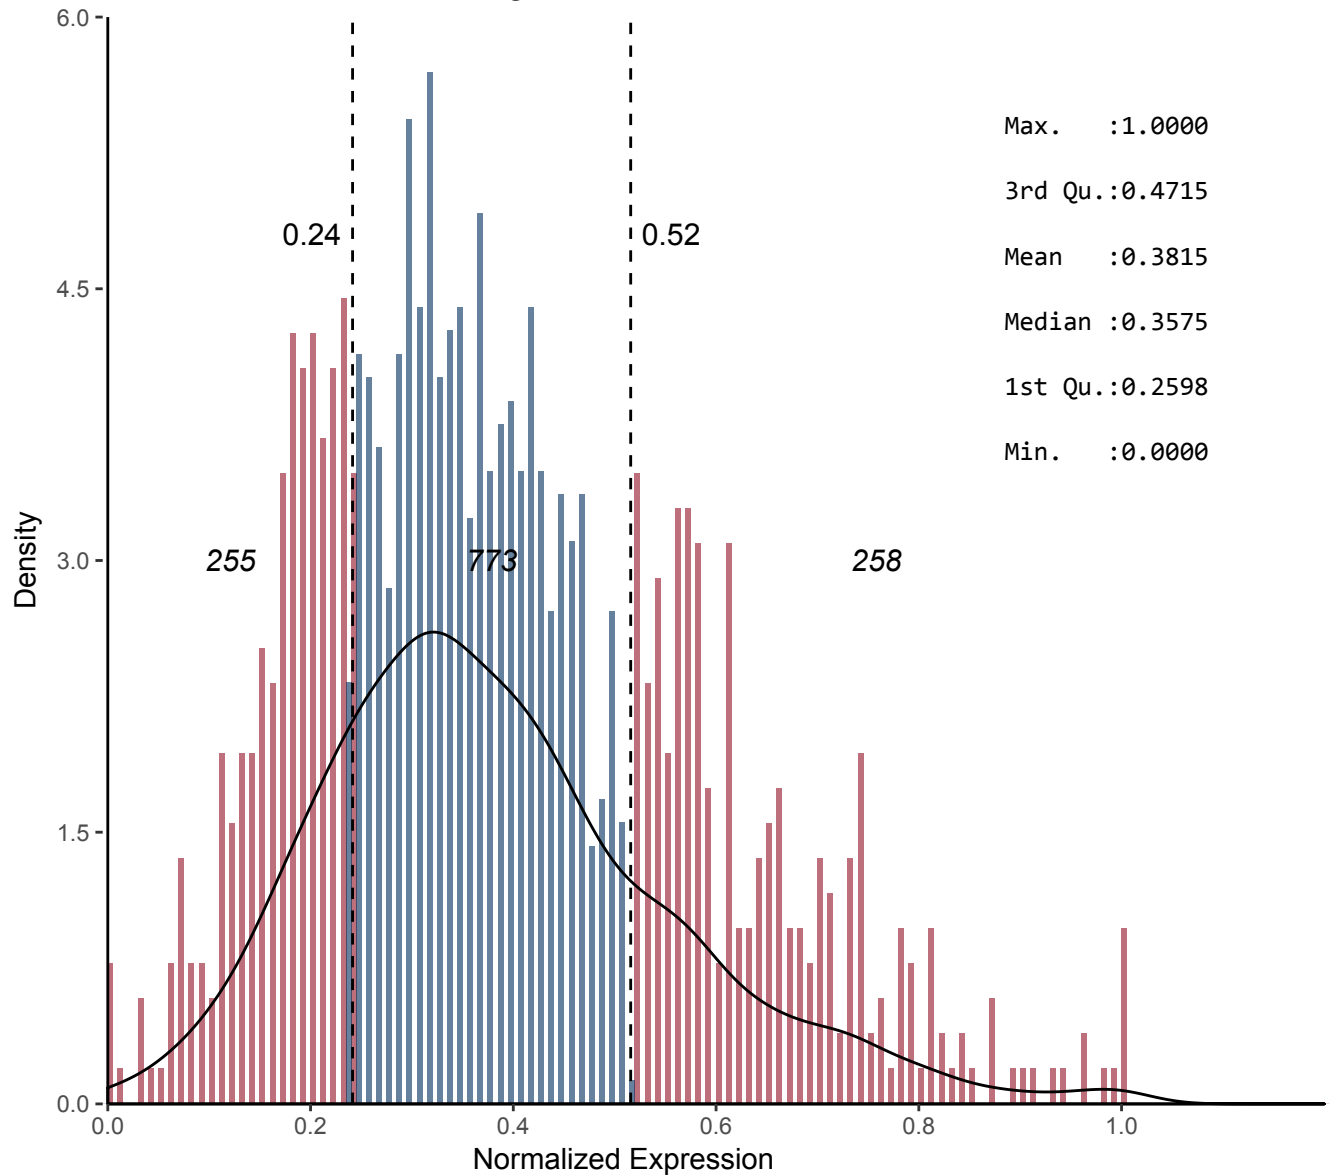

Aberrant TRUE FALSE

Figure 110 - CD93

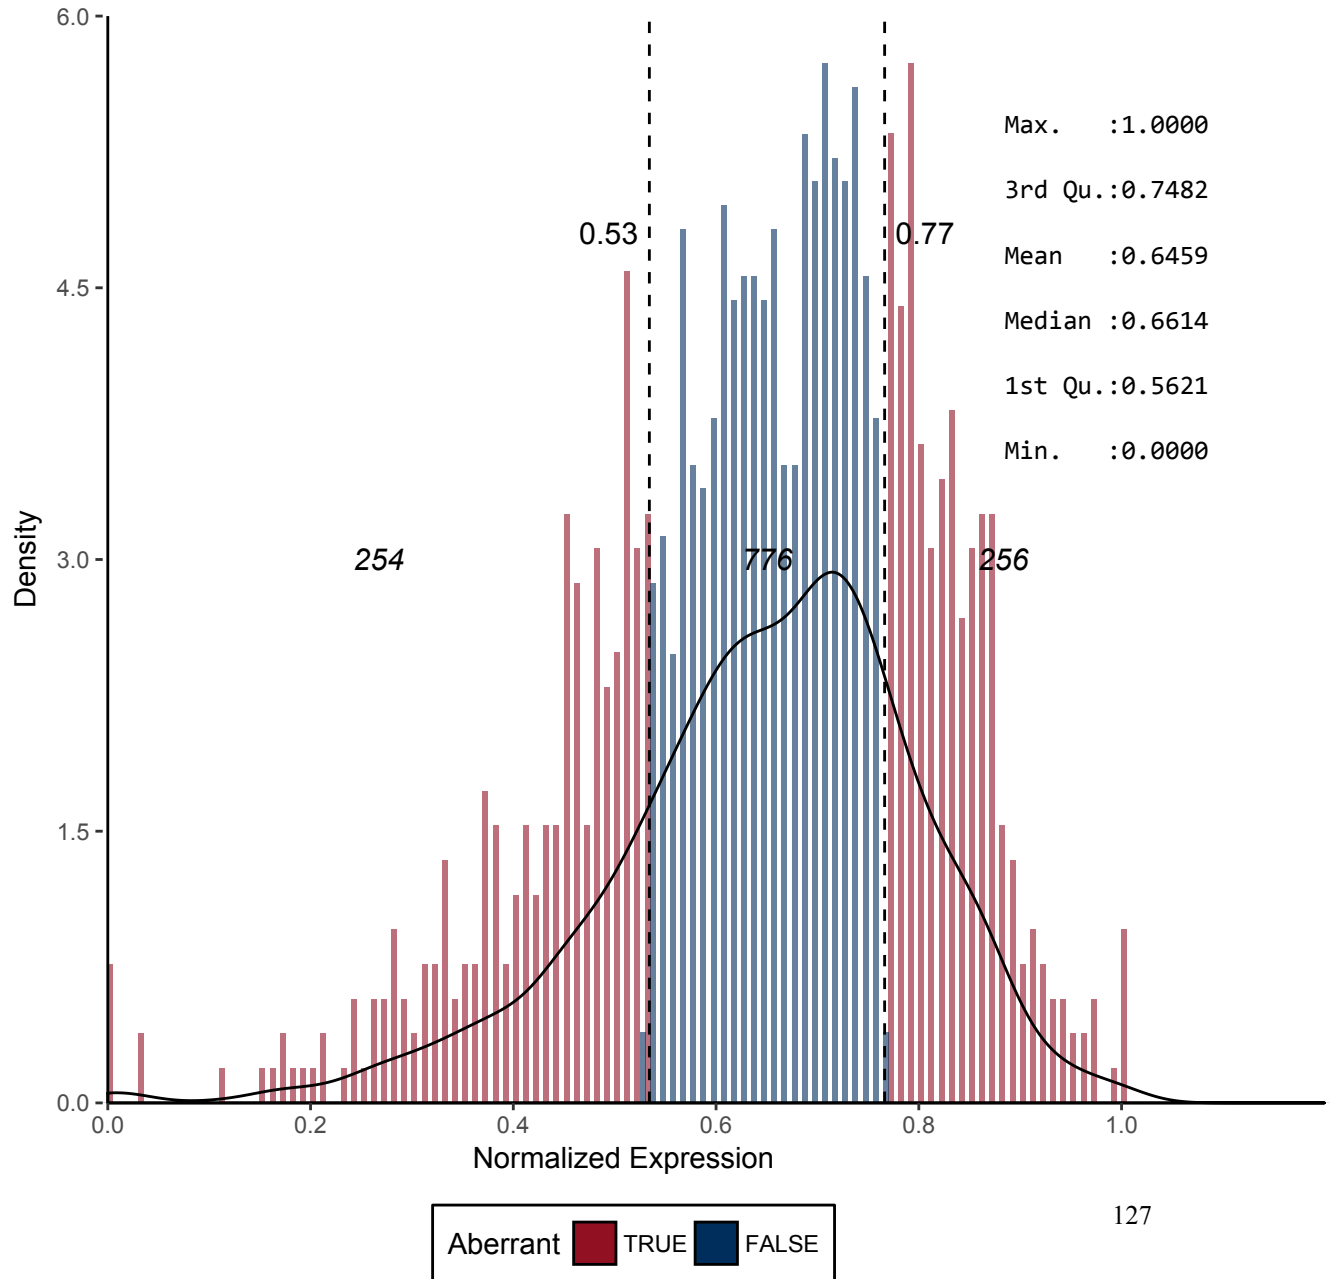

Figure 111 - CD94

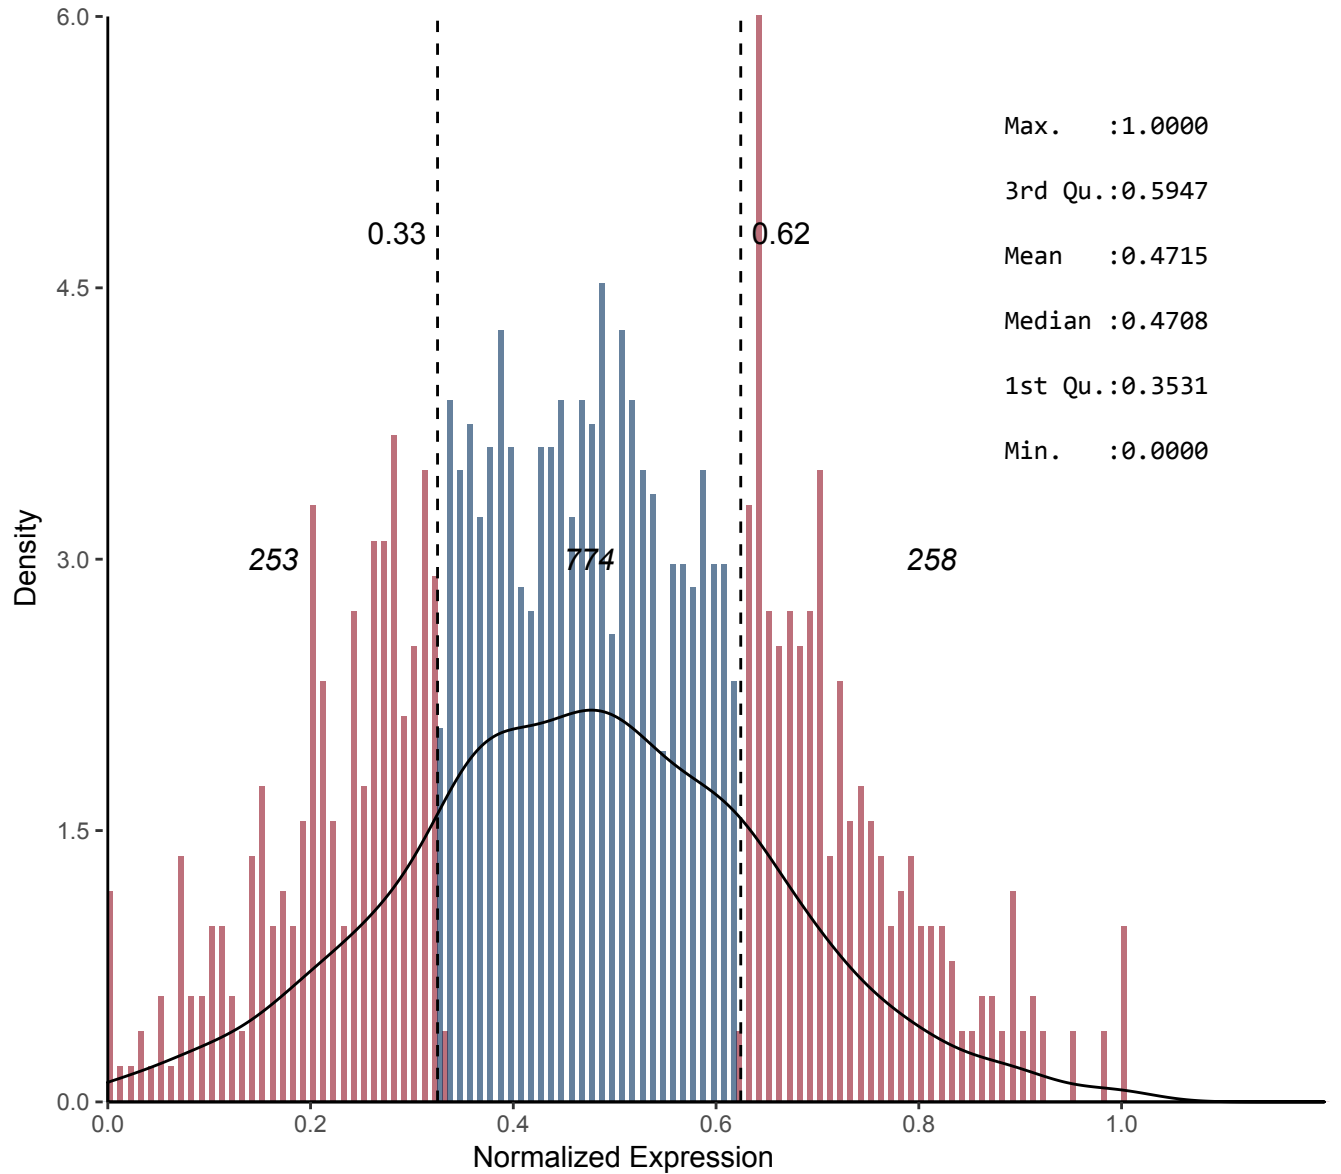

Aberrant TRUE FALSE



Figure 112 - CD95

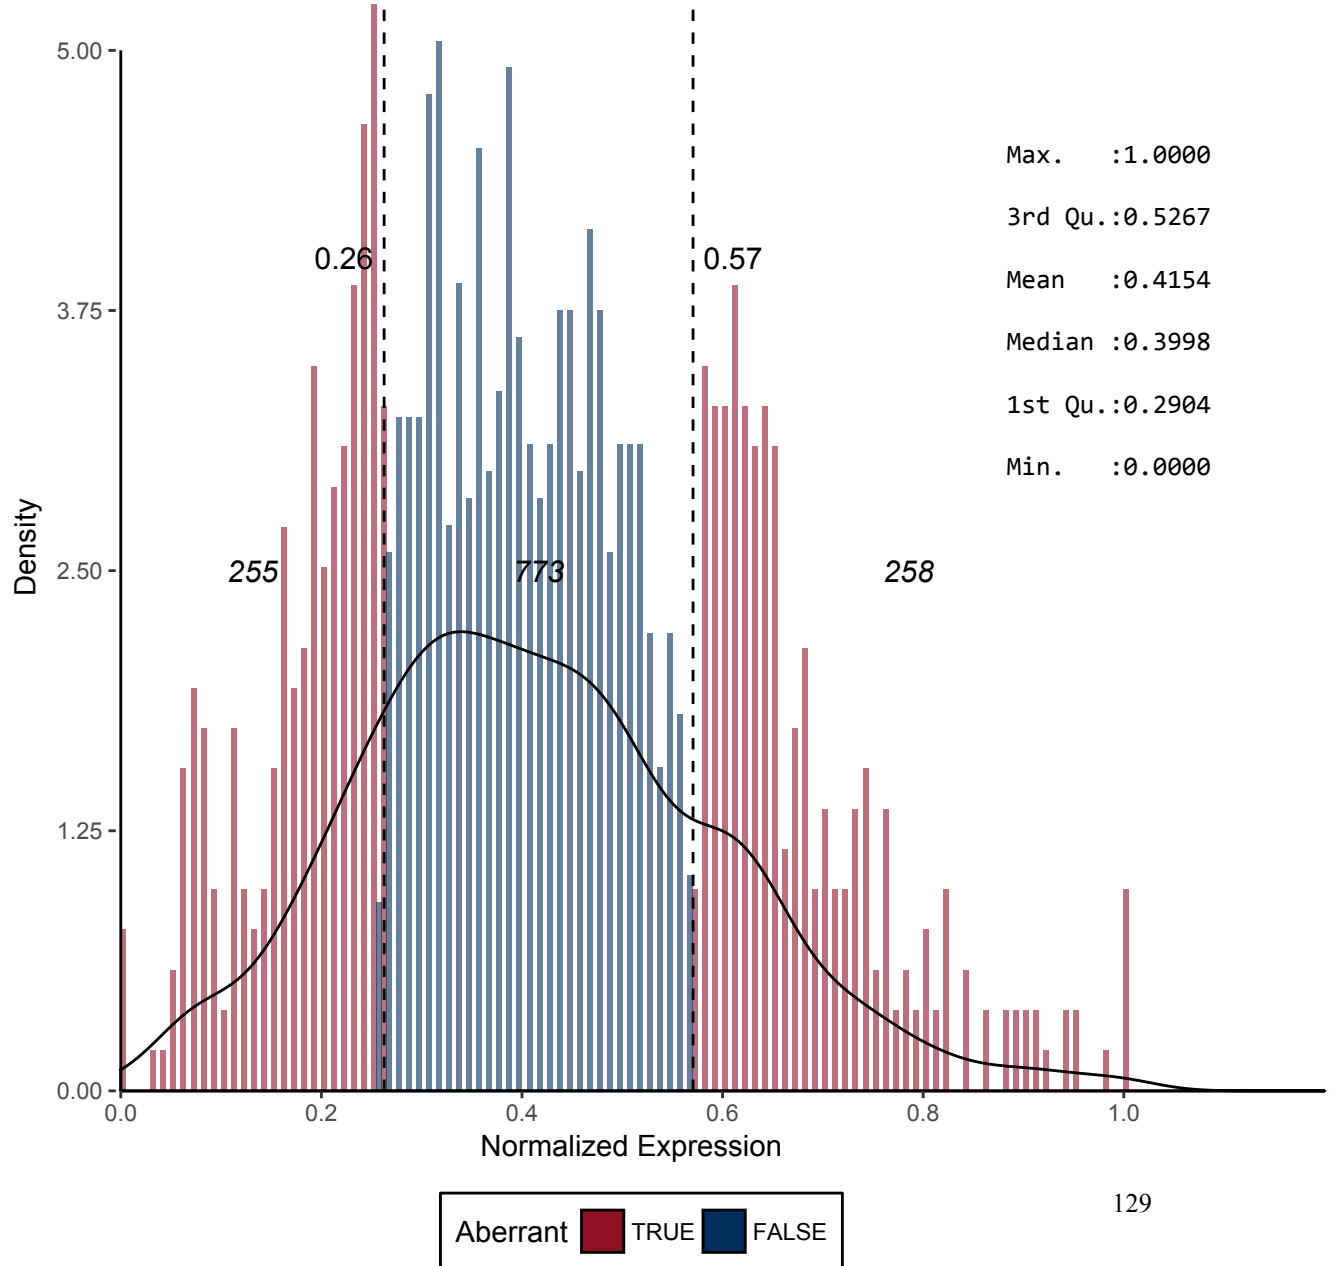

Figure 113 - CD96

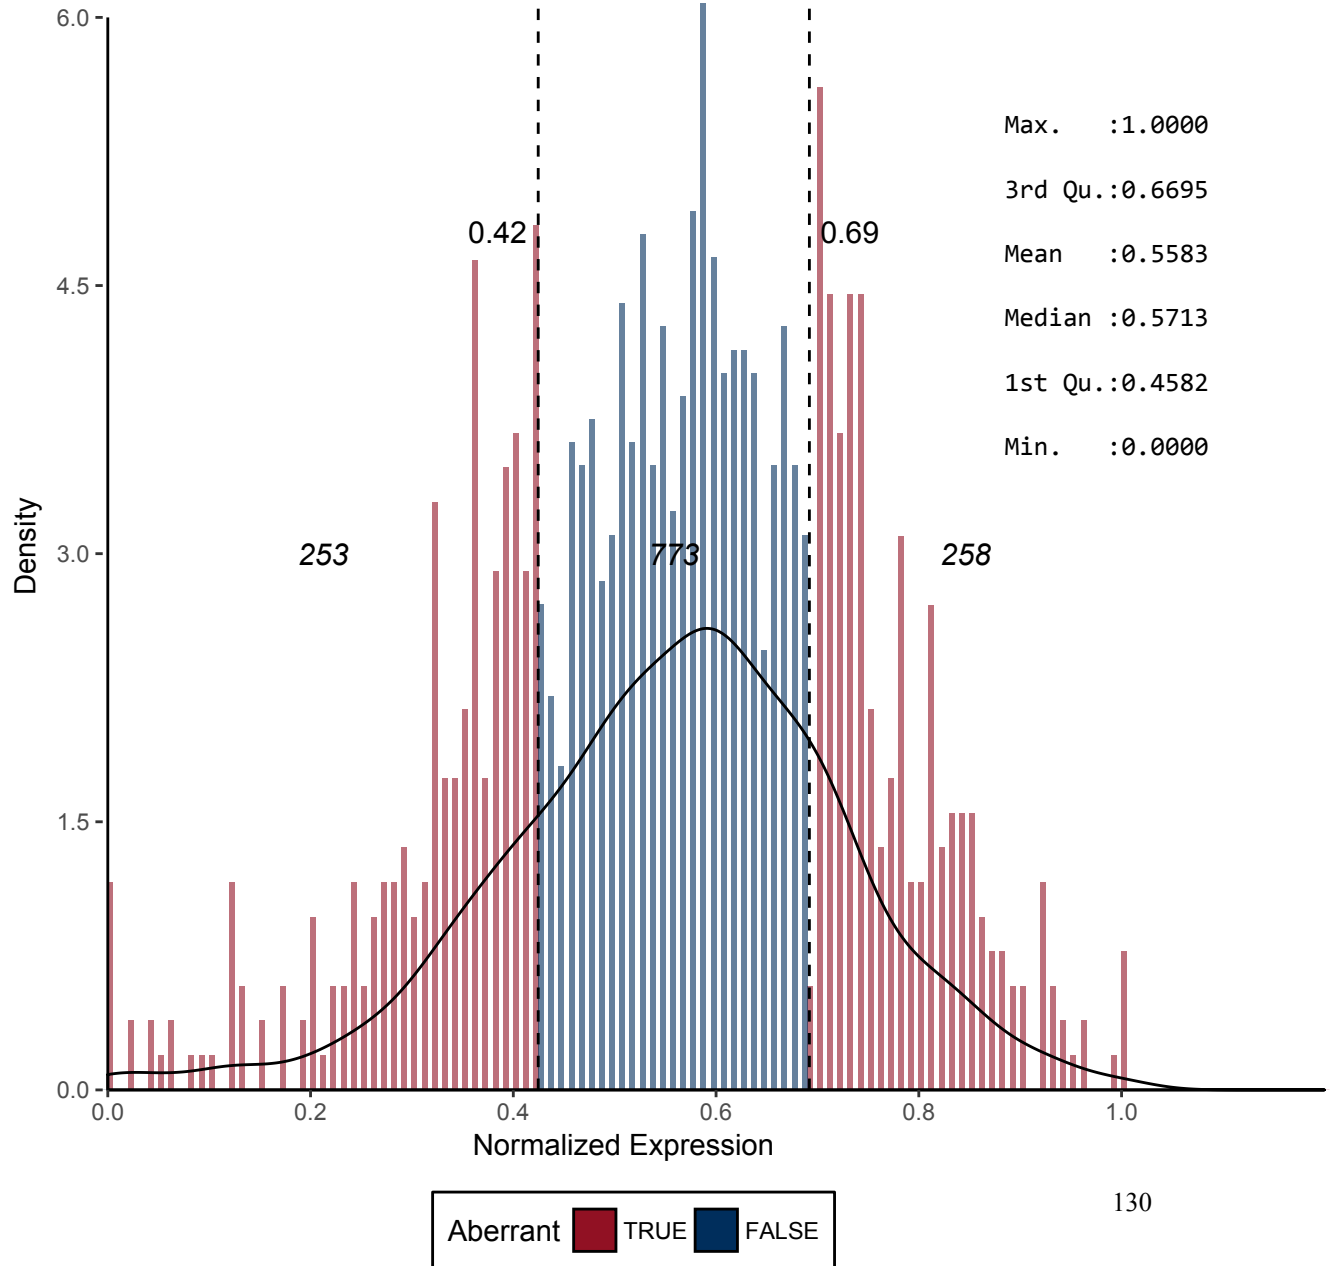

Figure 114 - CD97

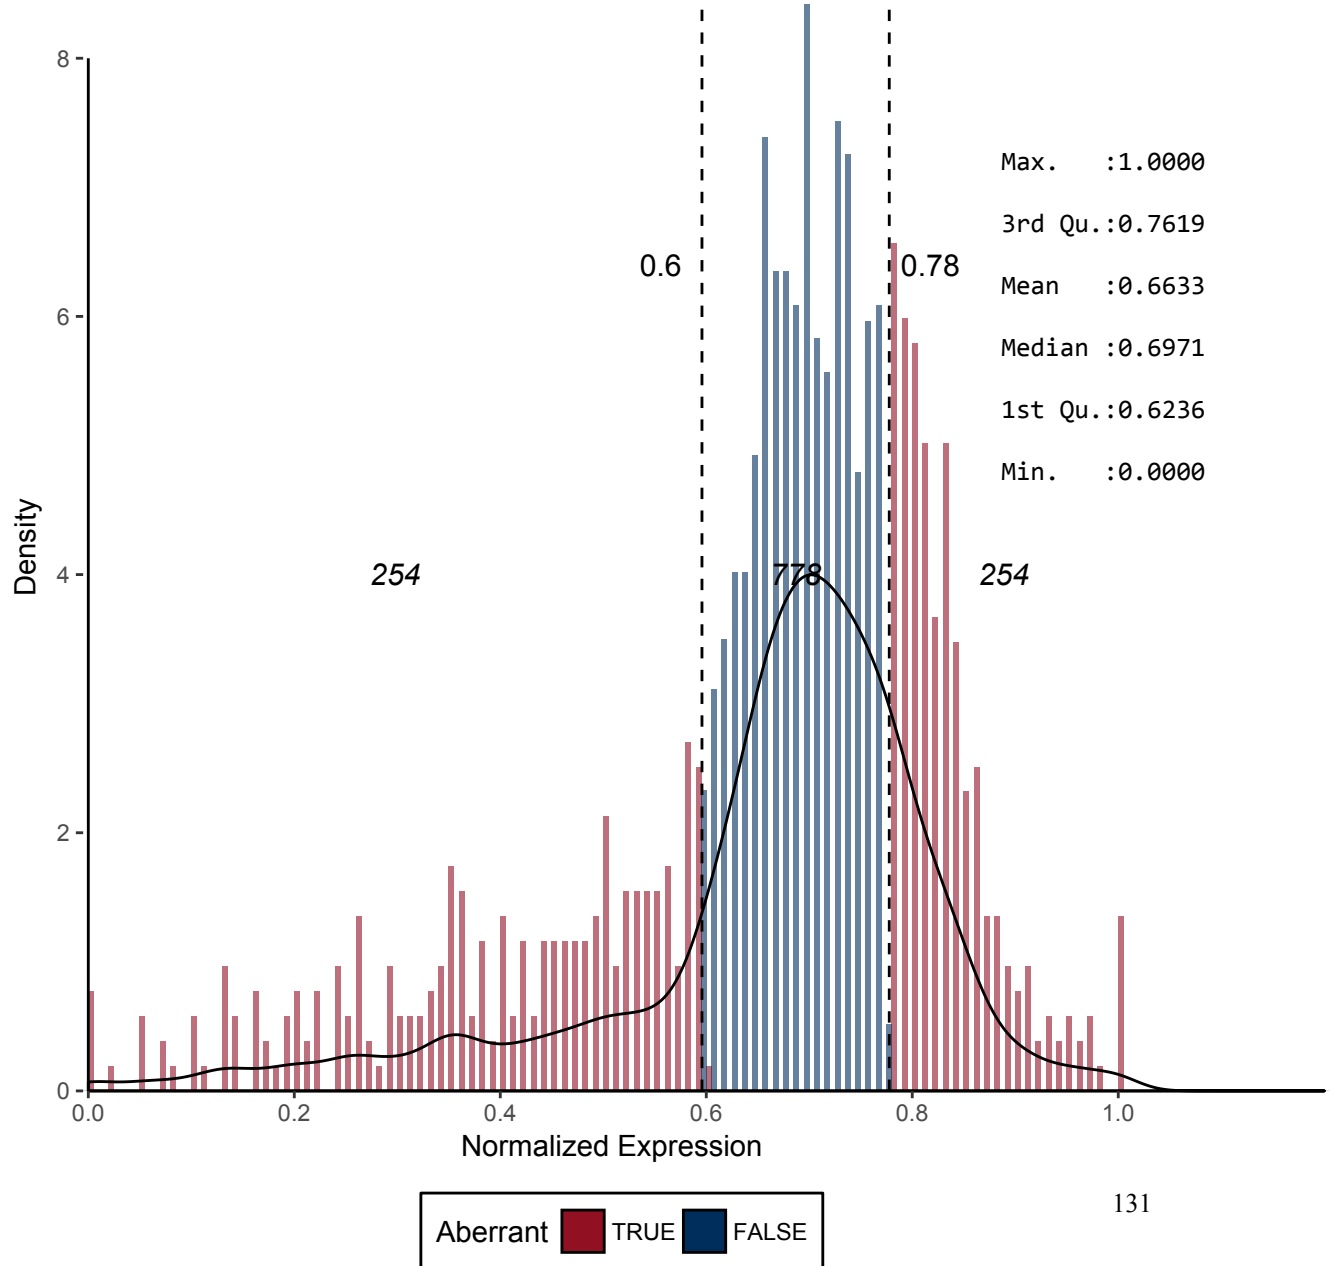

Figure 115 - CD98

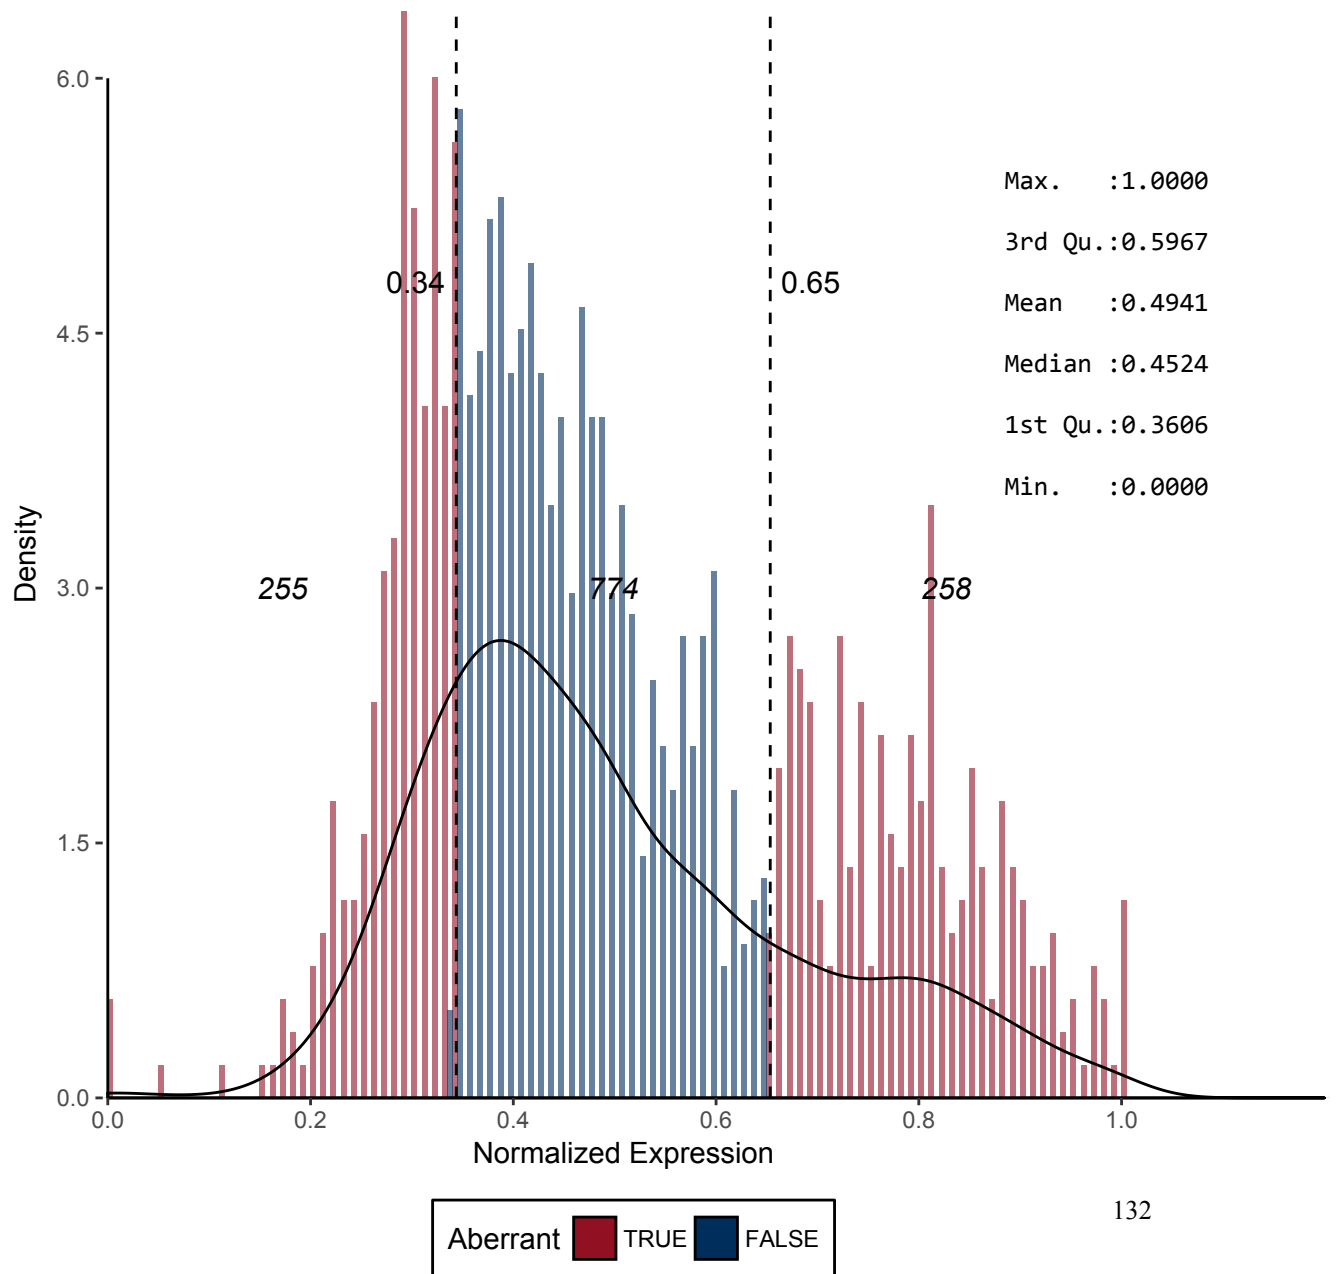

Figure 116 - CD99

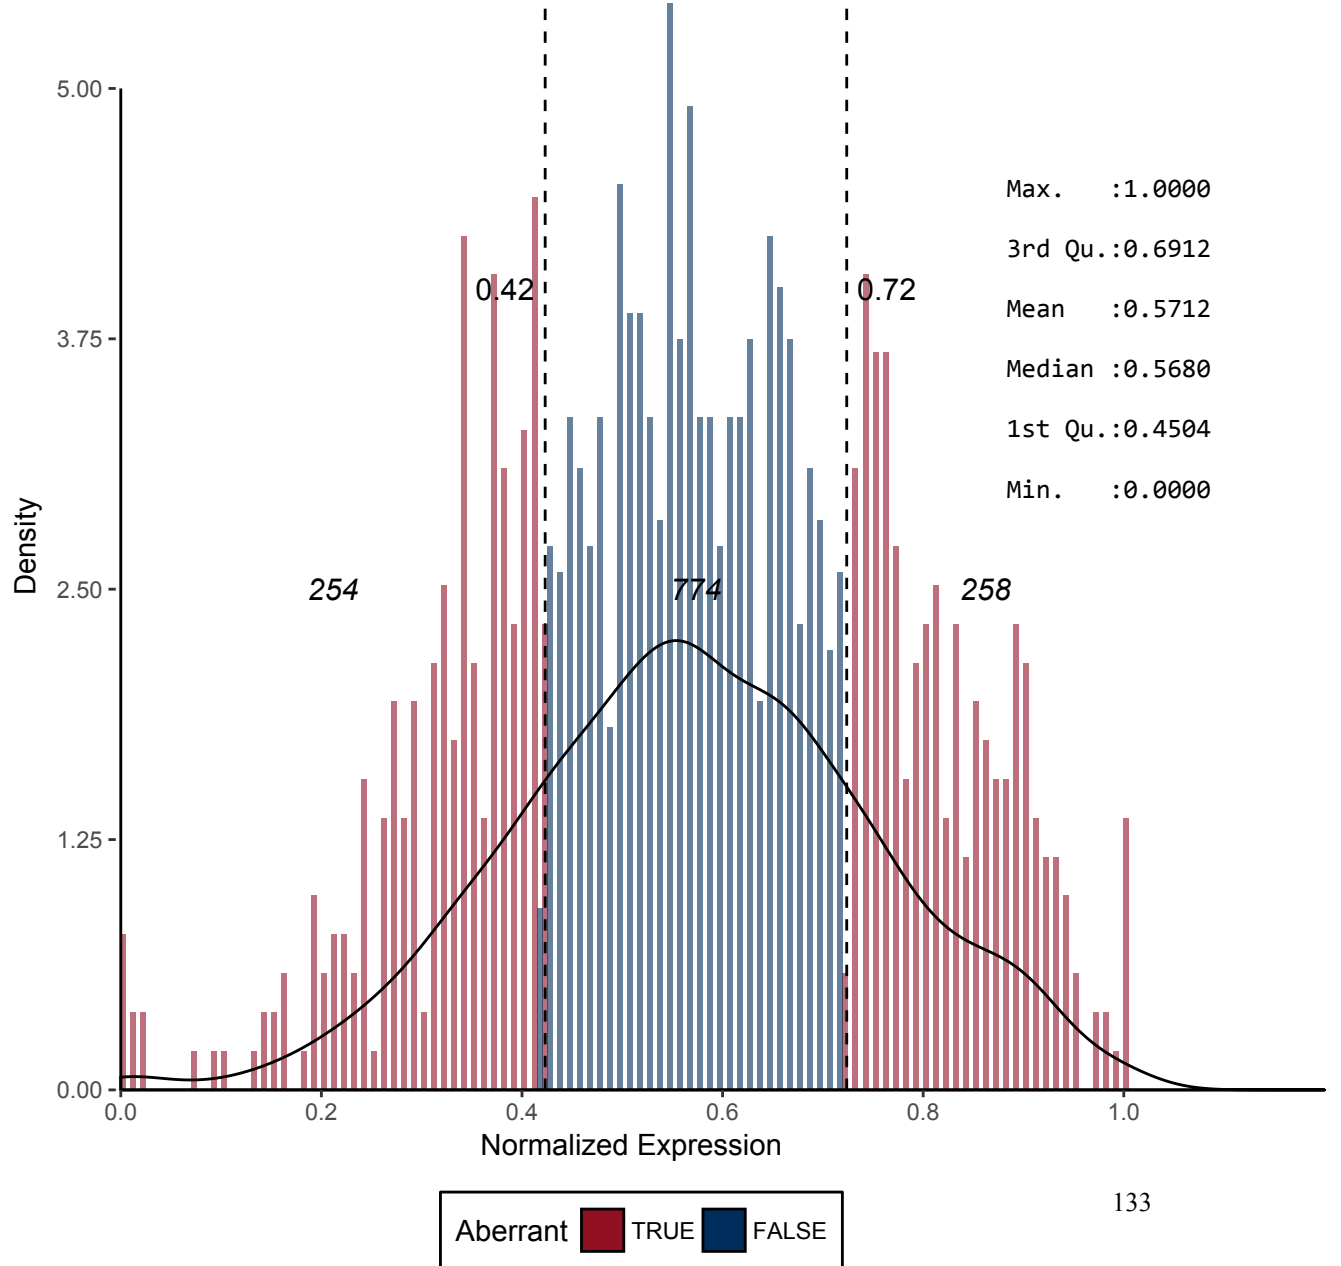

Figure 117 - CD100

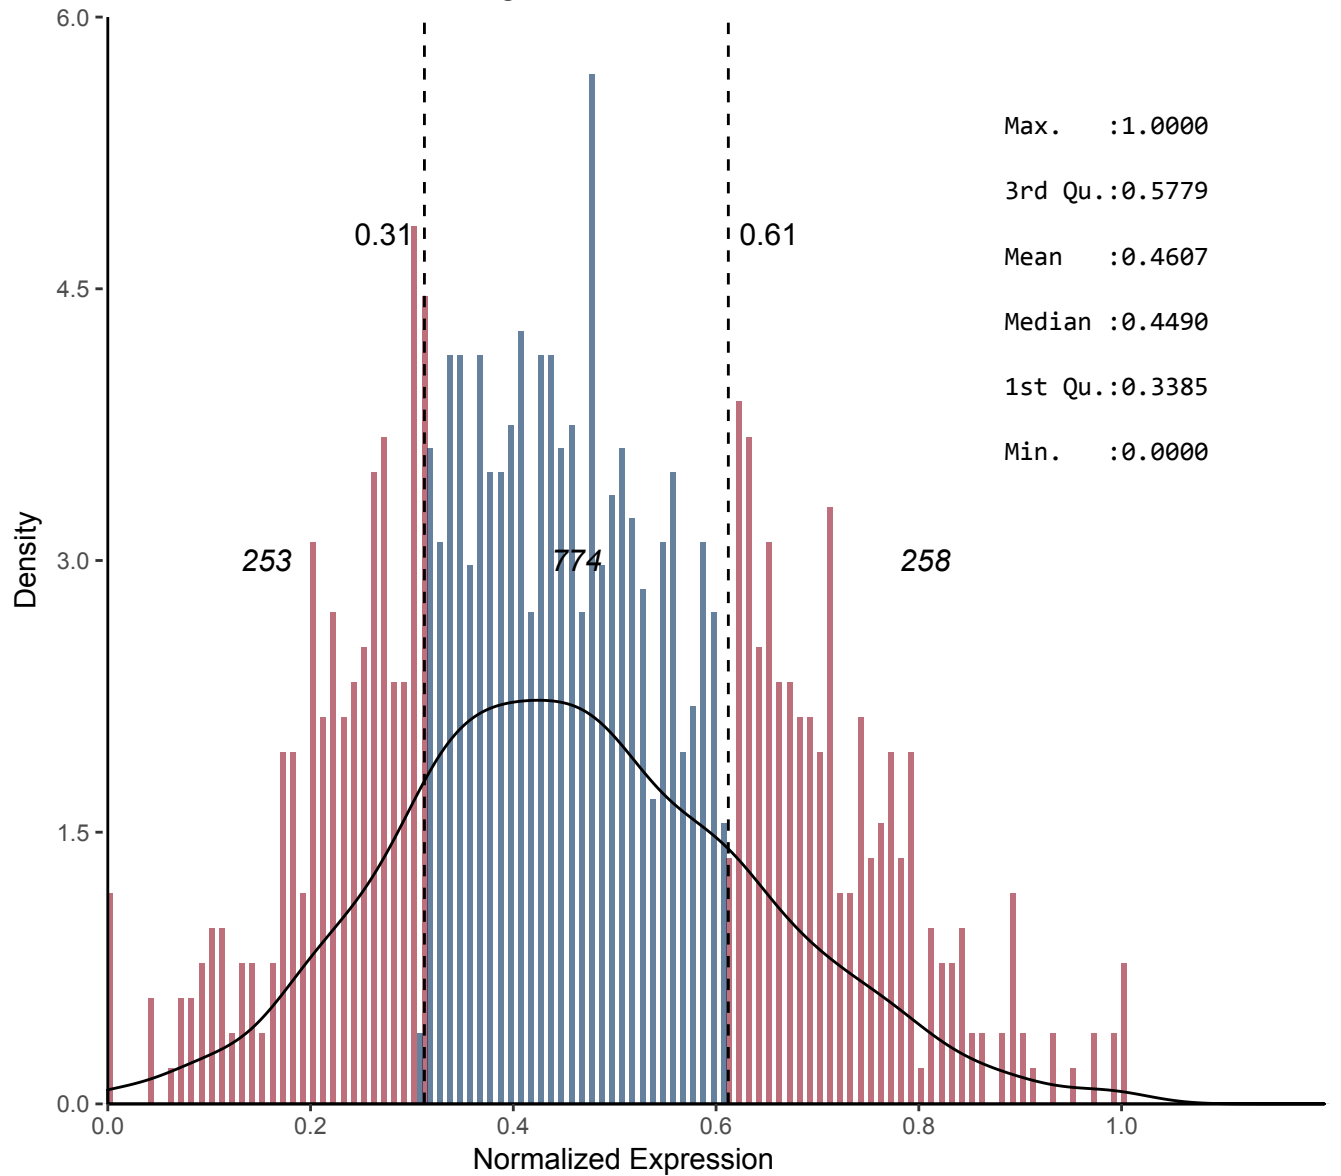

Aberrant TRUE FALSE

Figure 118 - CD101

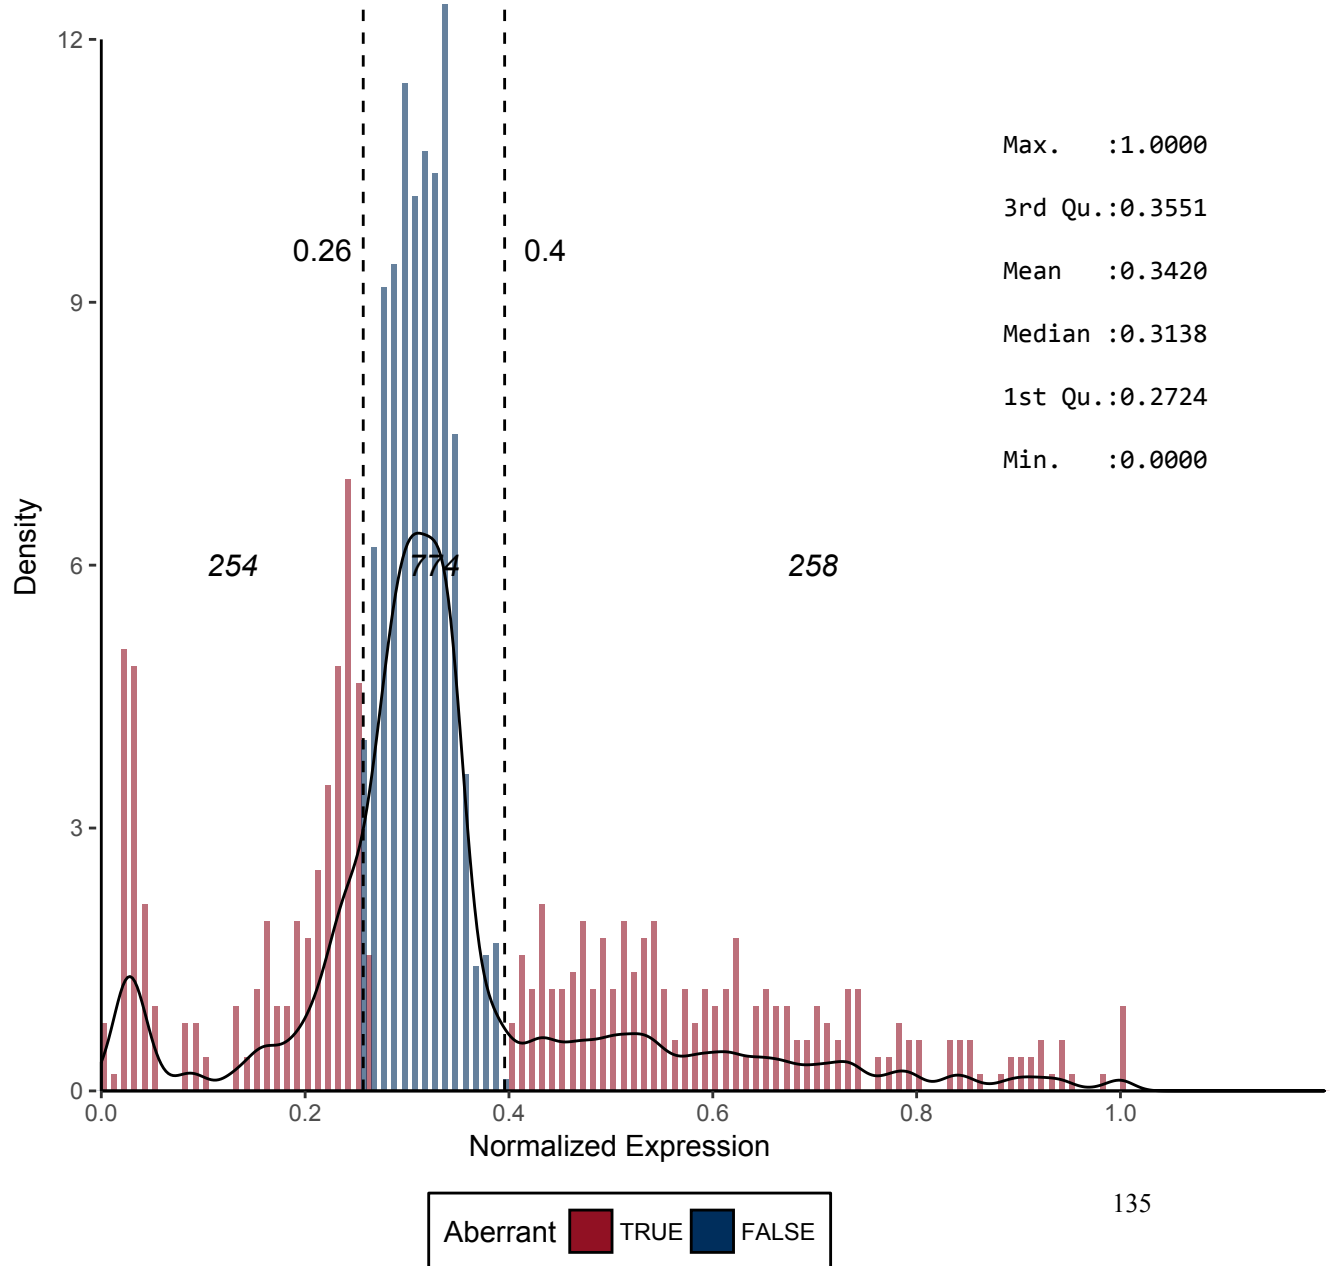

Figure 119 - CD102

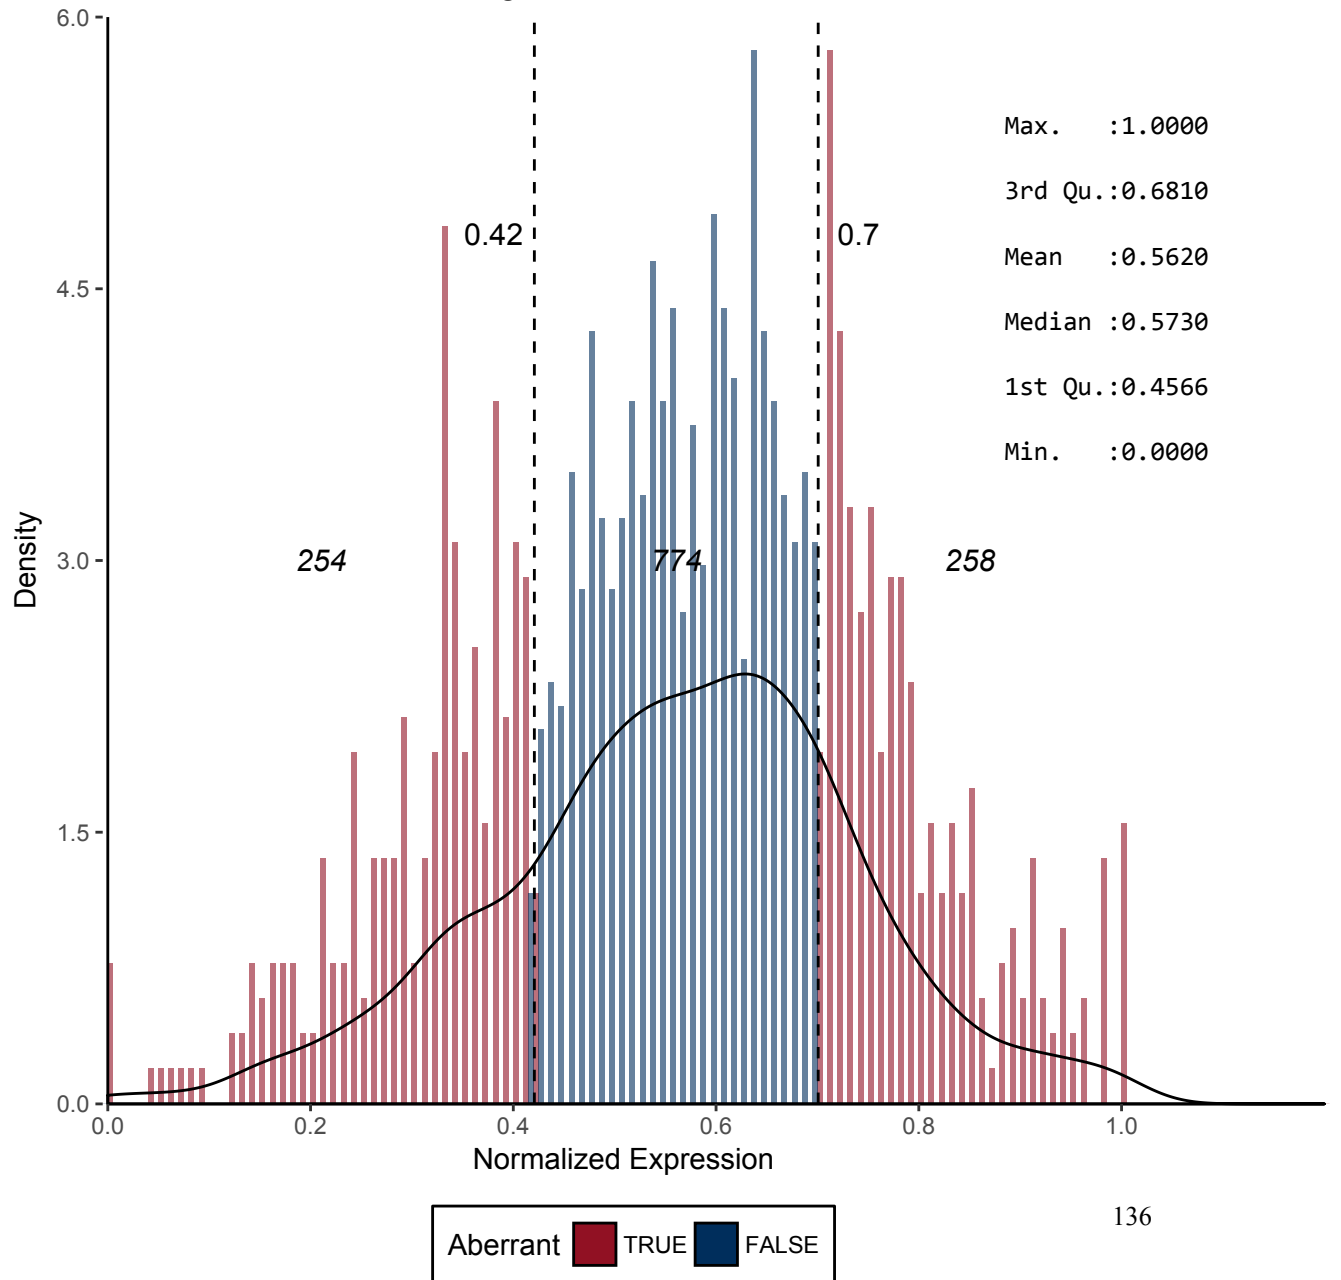



Figure 120 - CD103

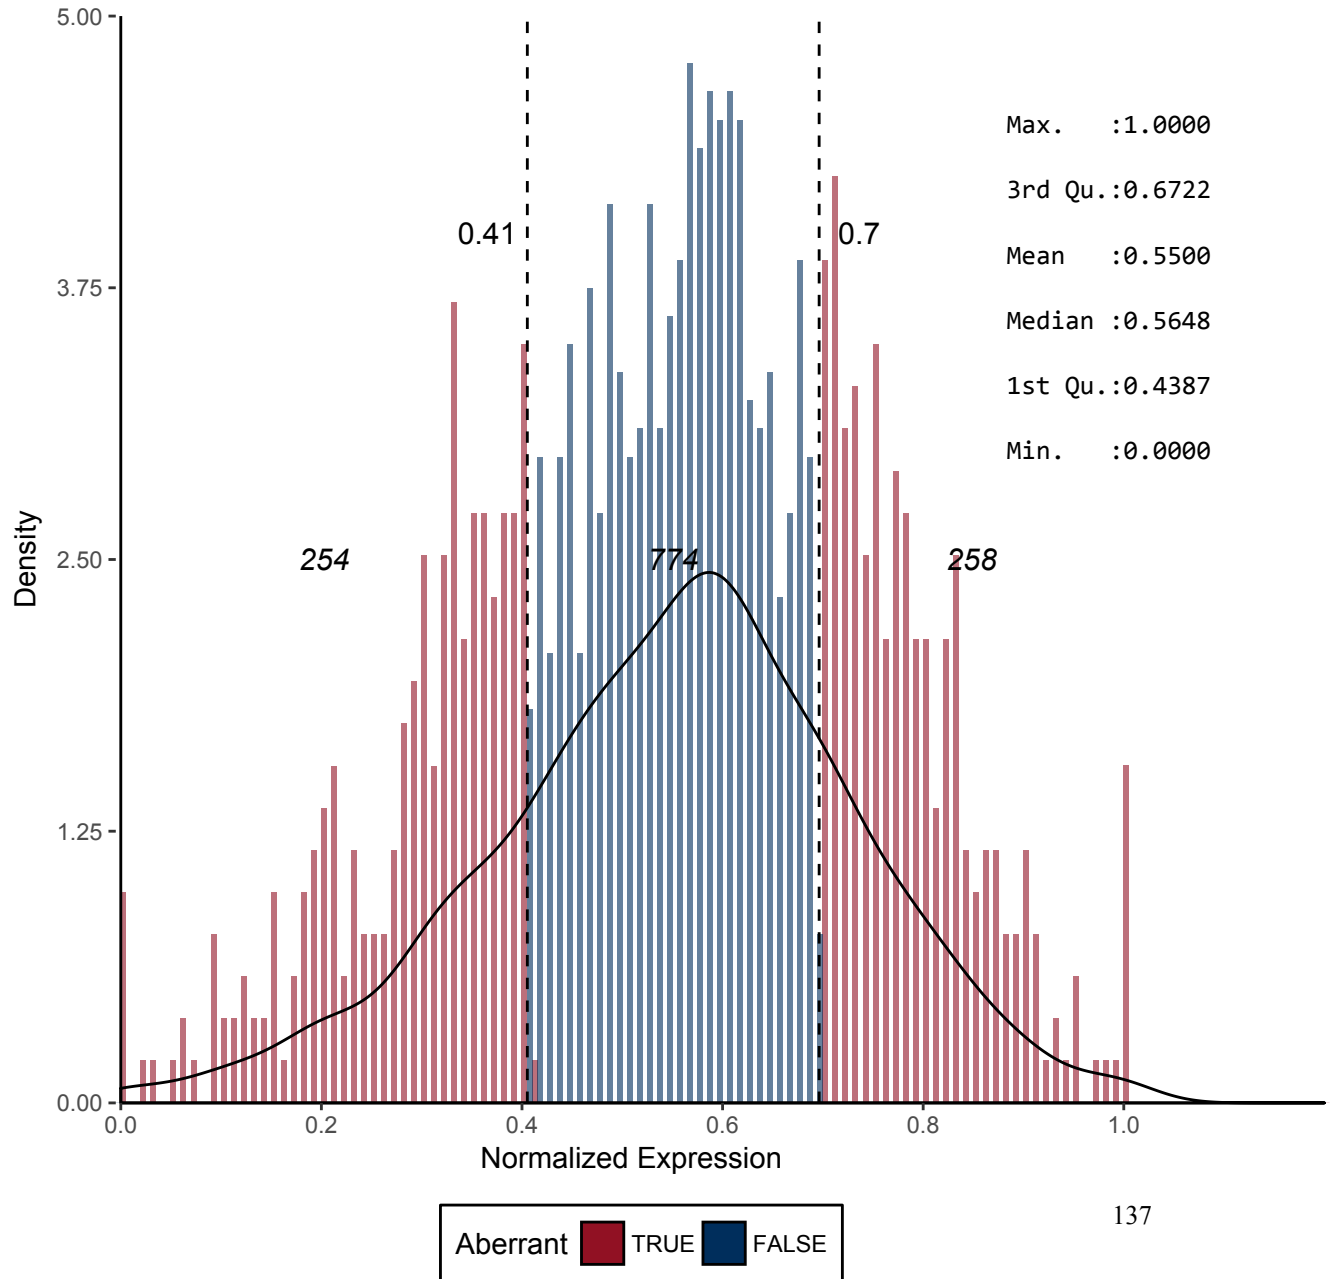

Figure 121 - CD104\*

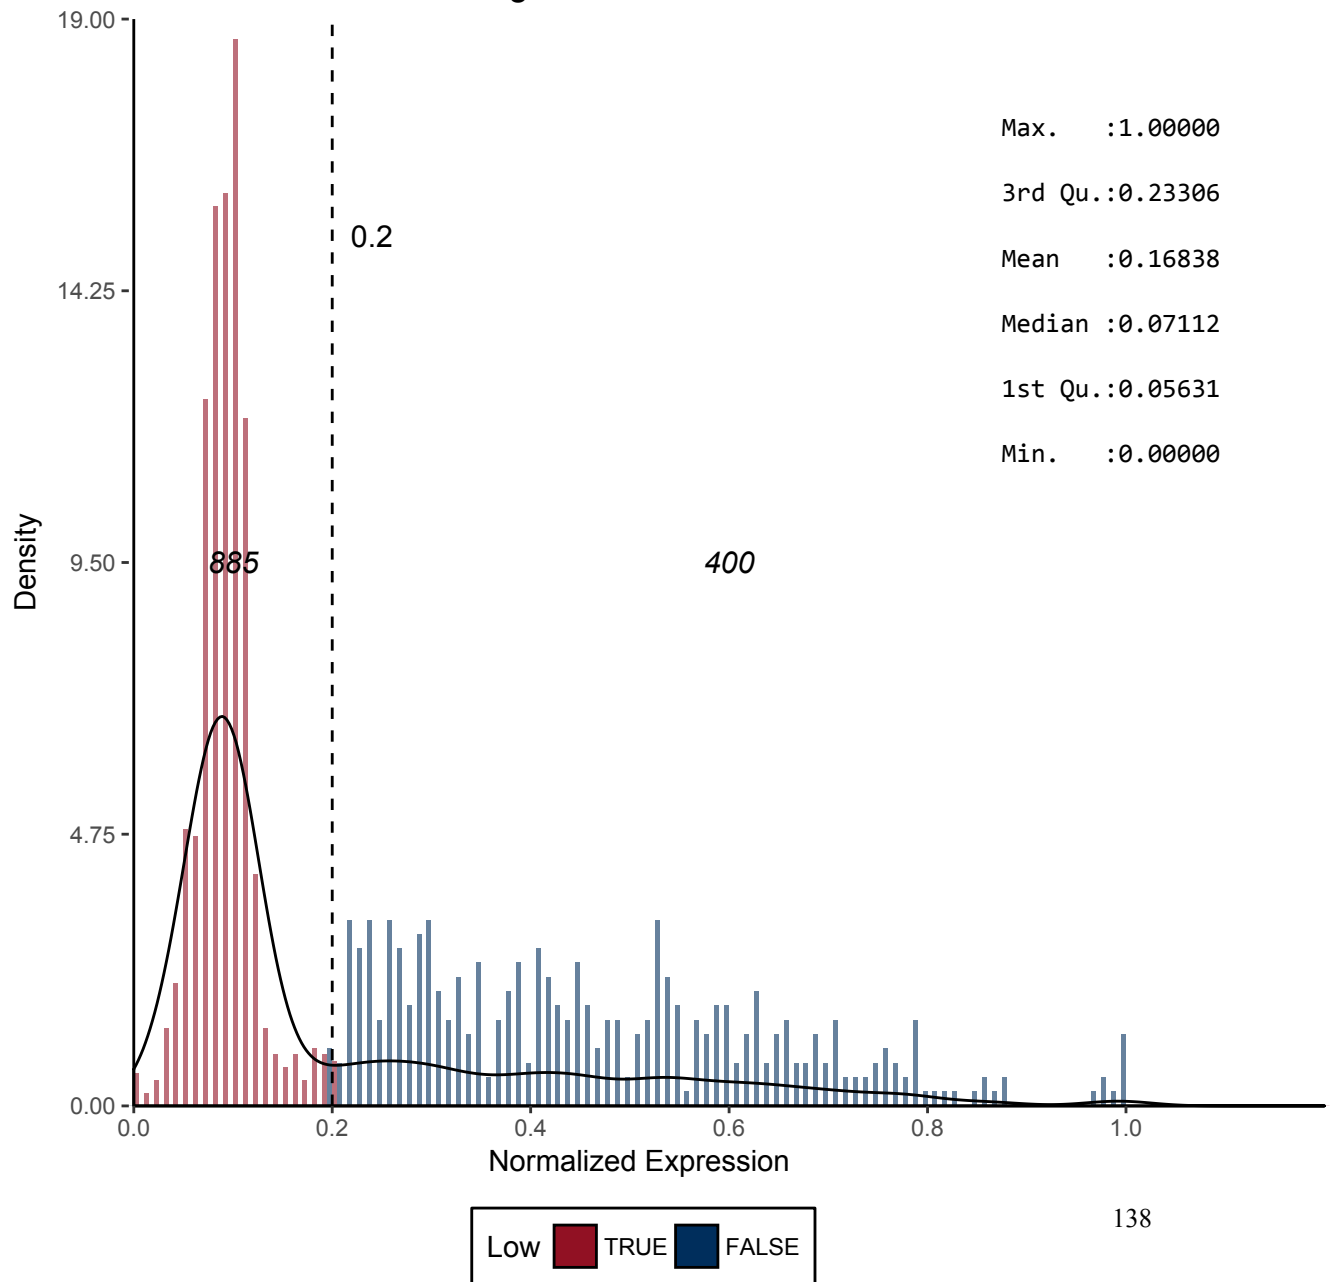

Figure 122 - CD105\*

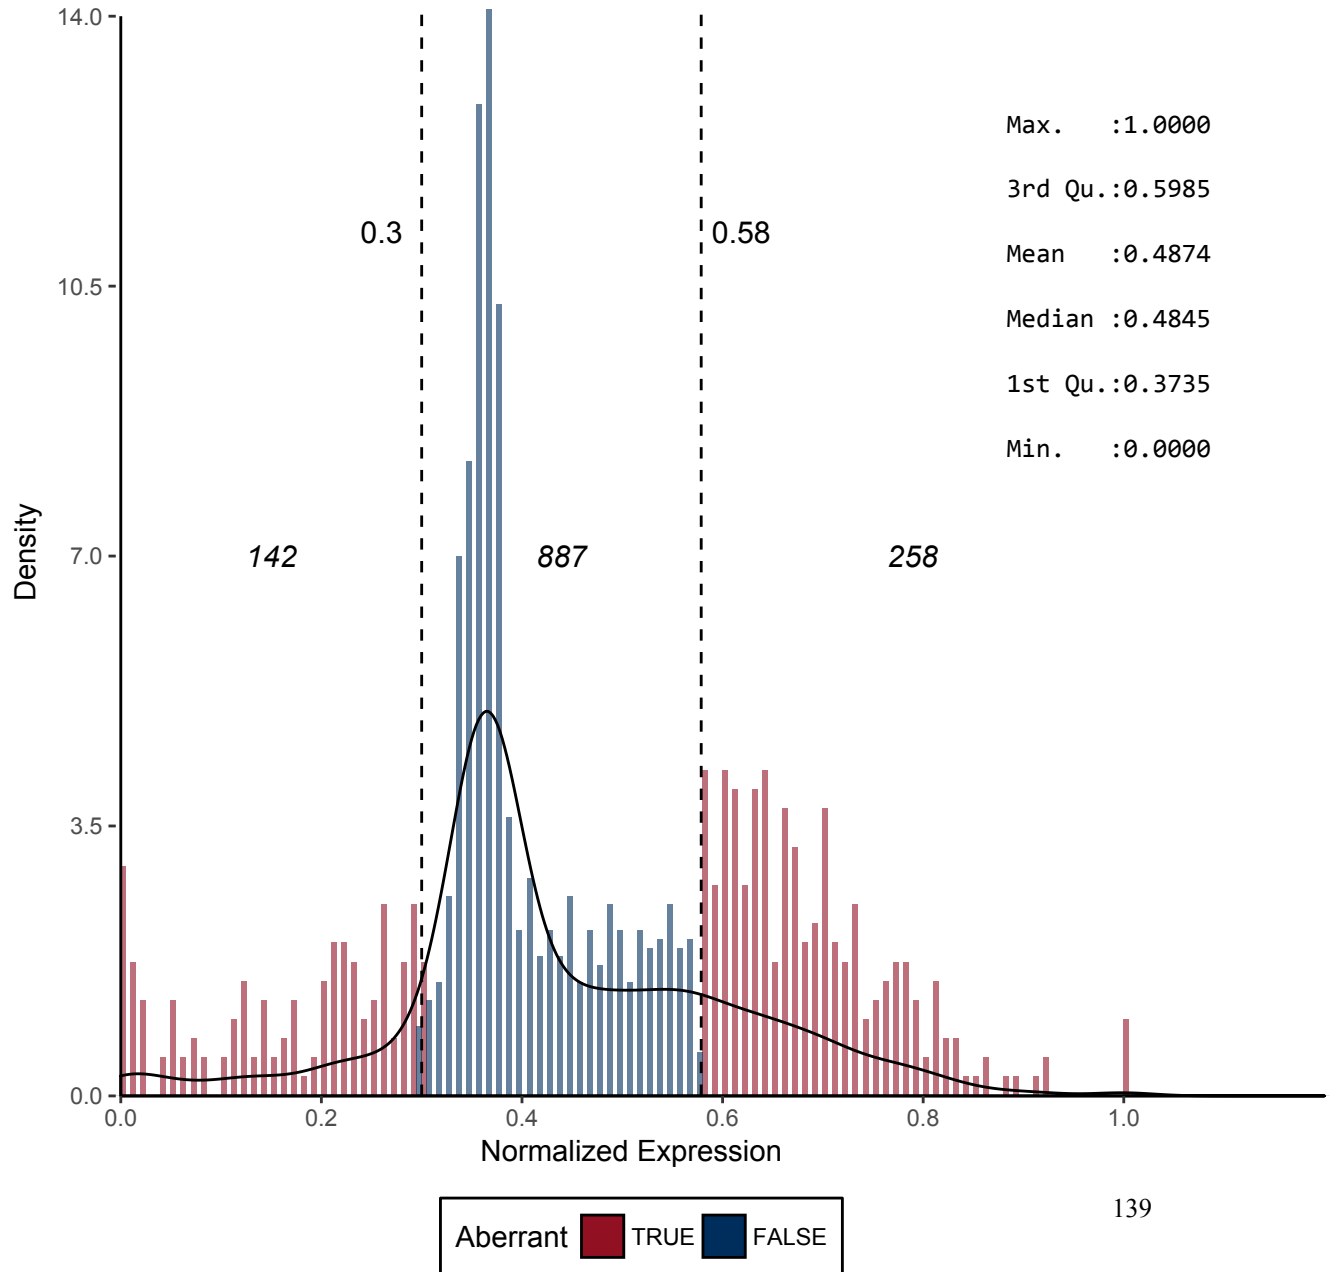

Figure 123 - CD106\*

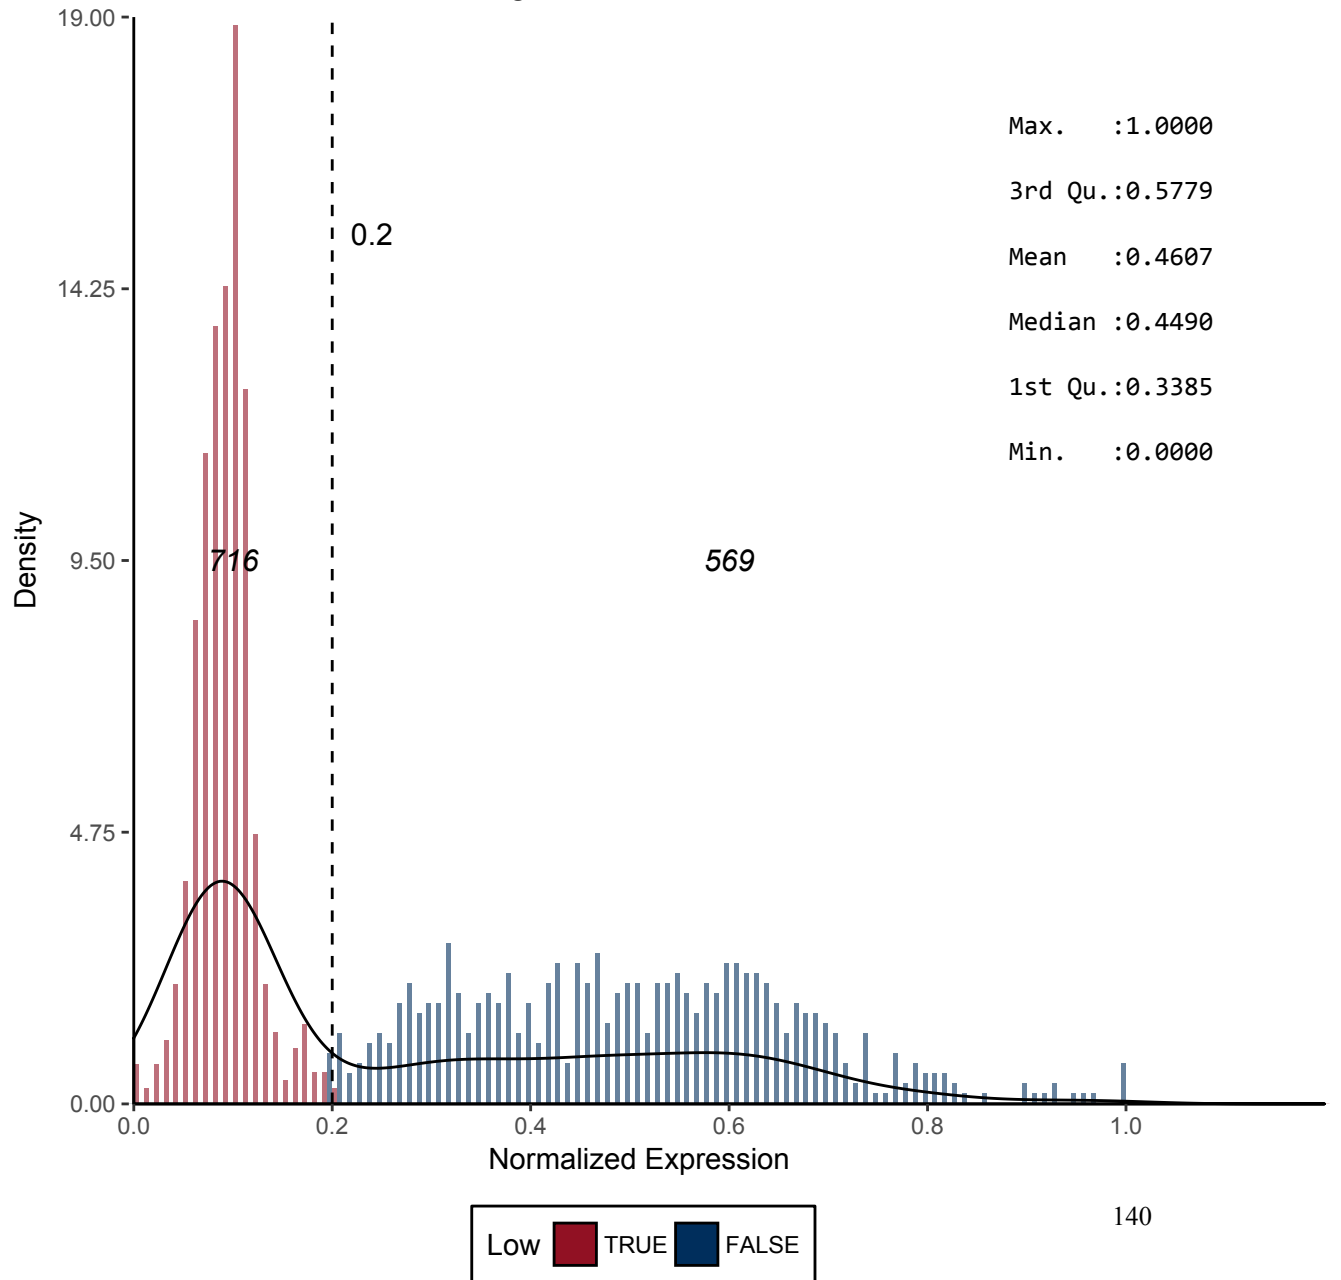

Figure 124 - CD107A

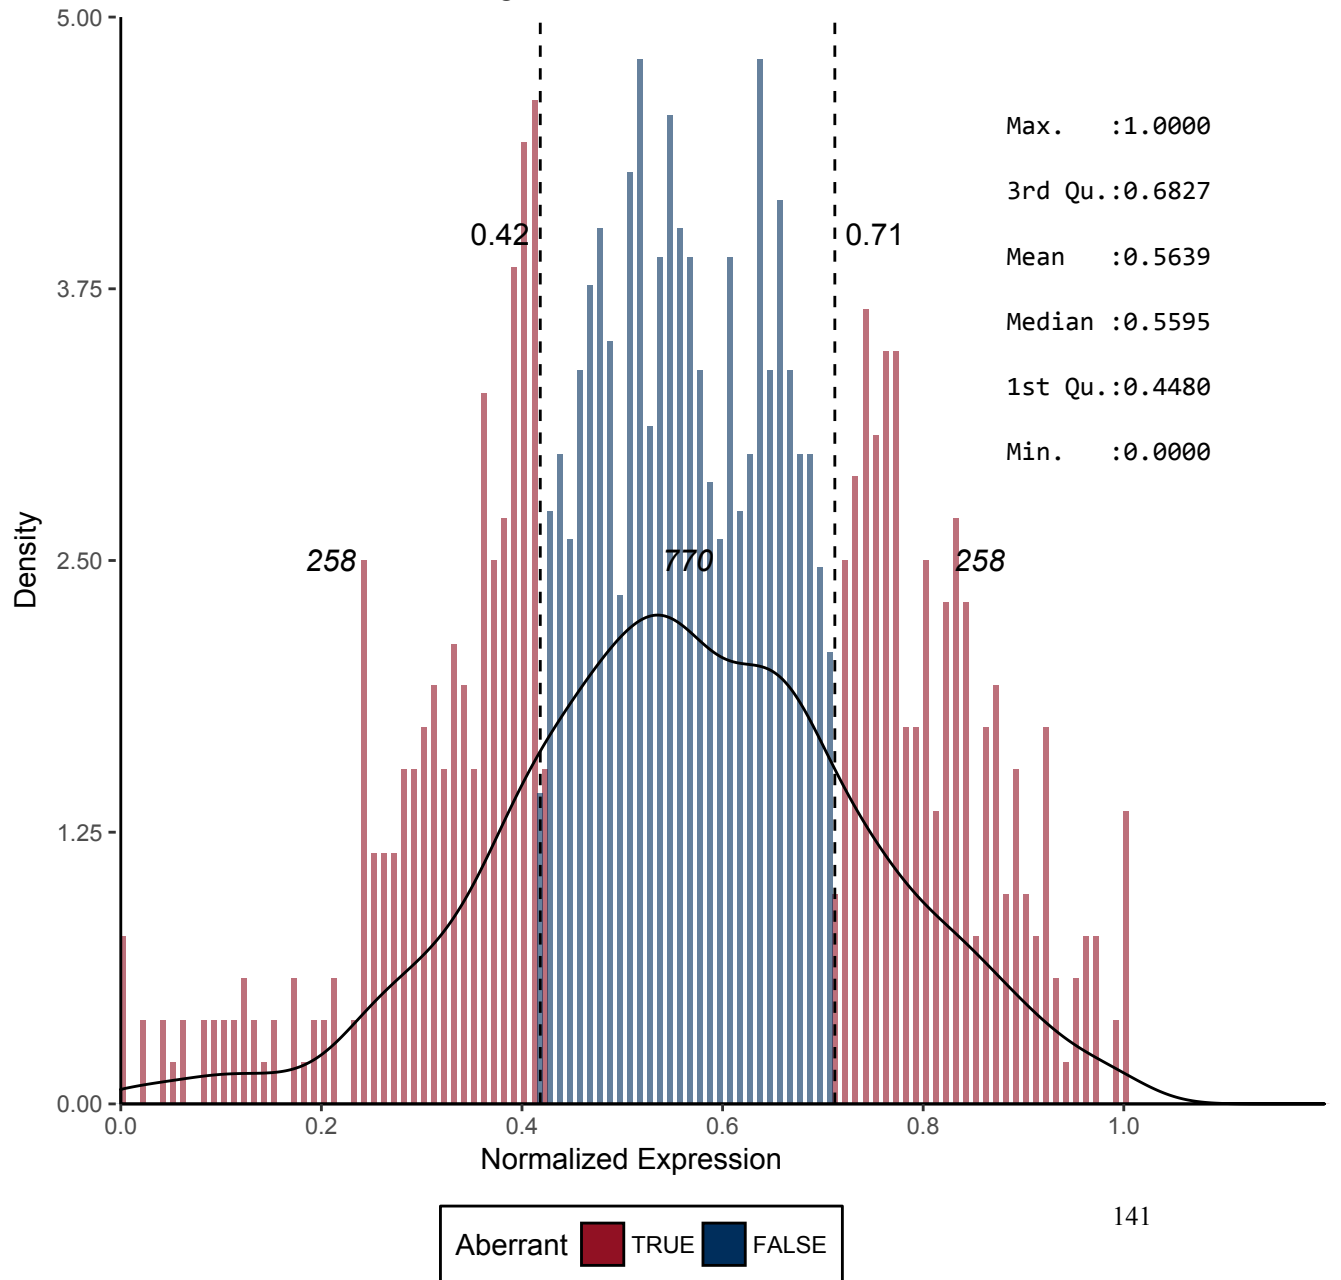

Figure 125 - CD107B

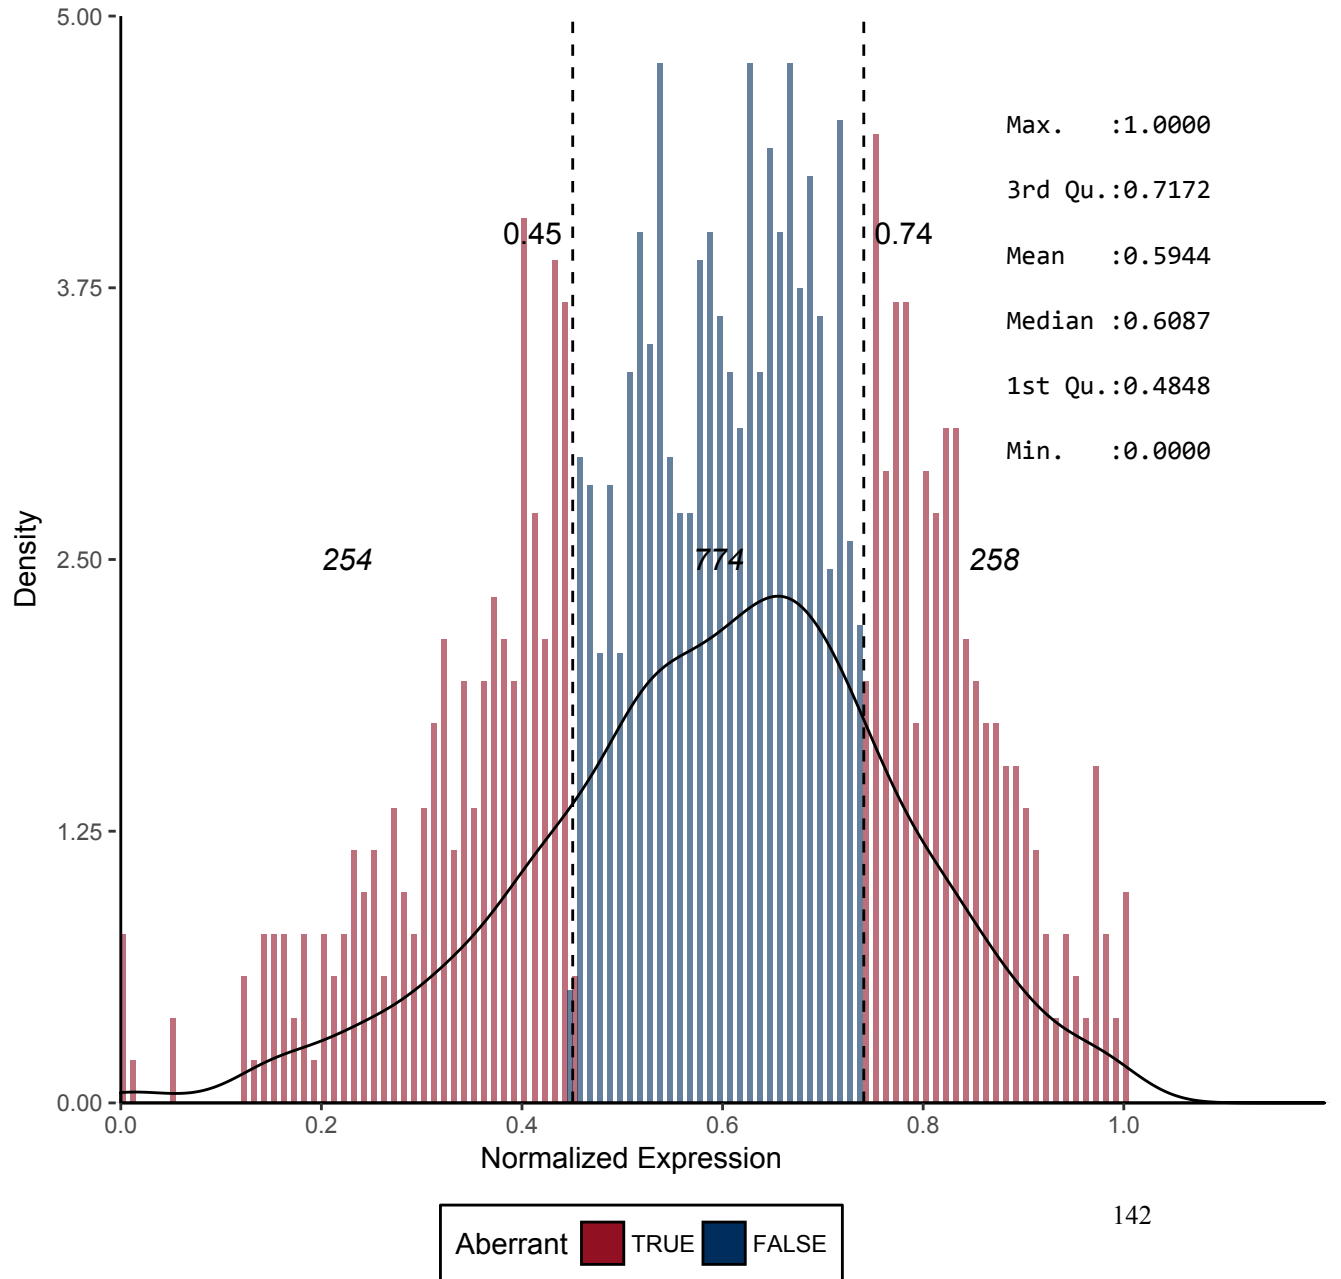

Figure 126 - CD108\*

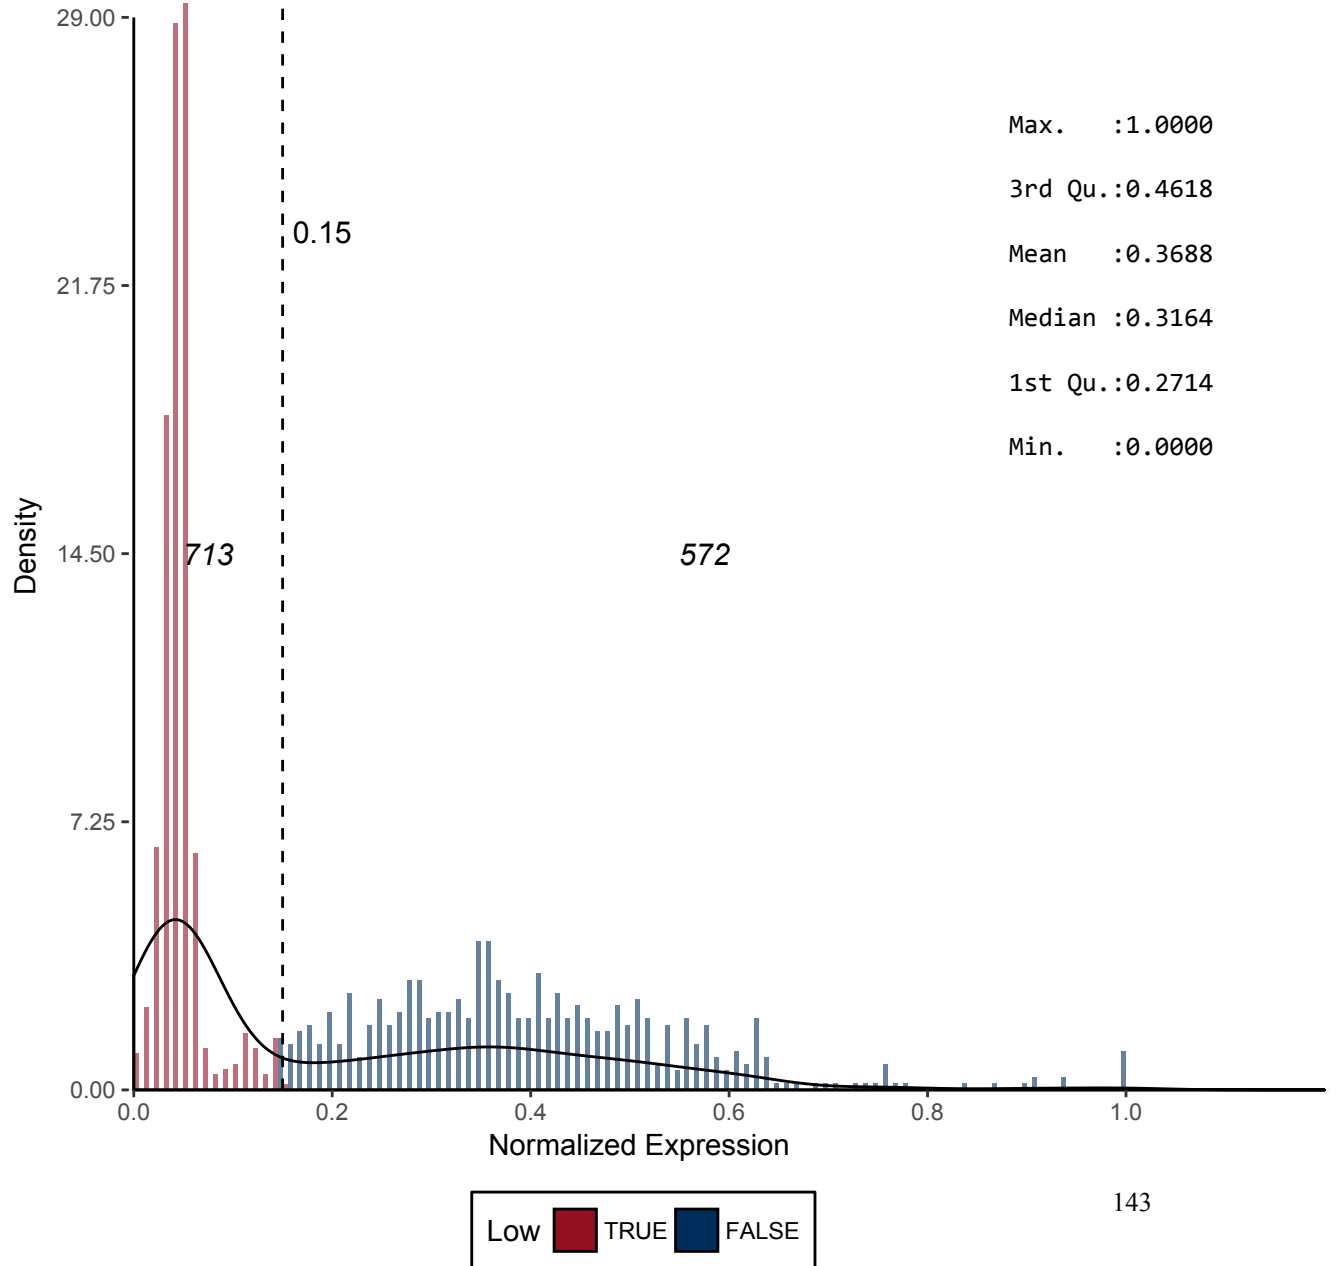

Figure 127 - CD109\*

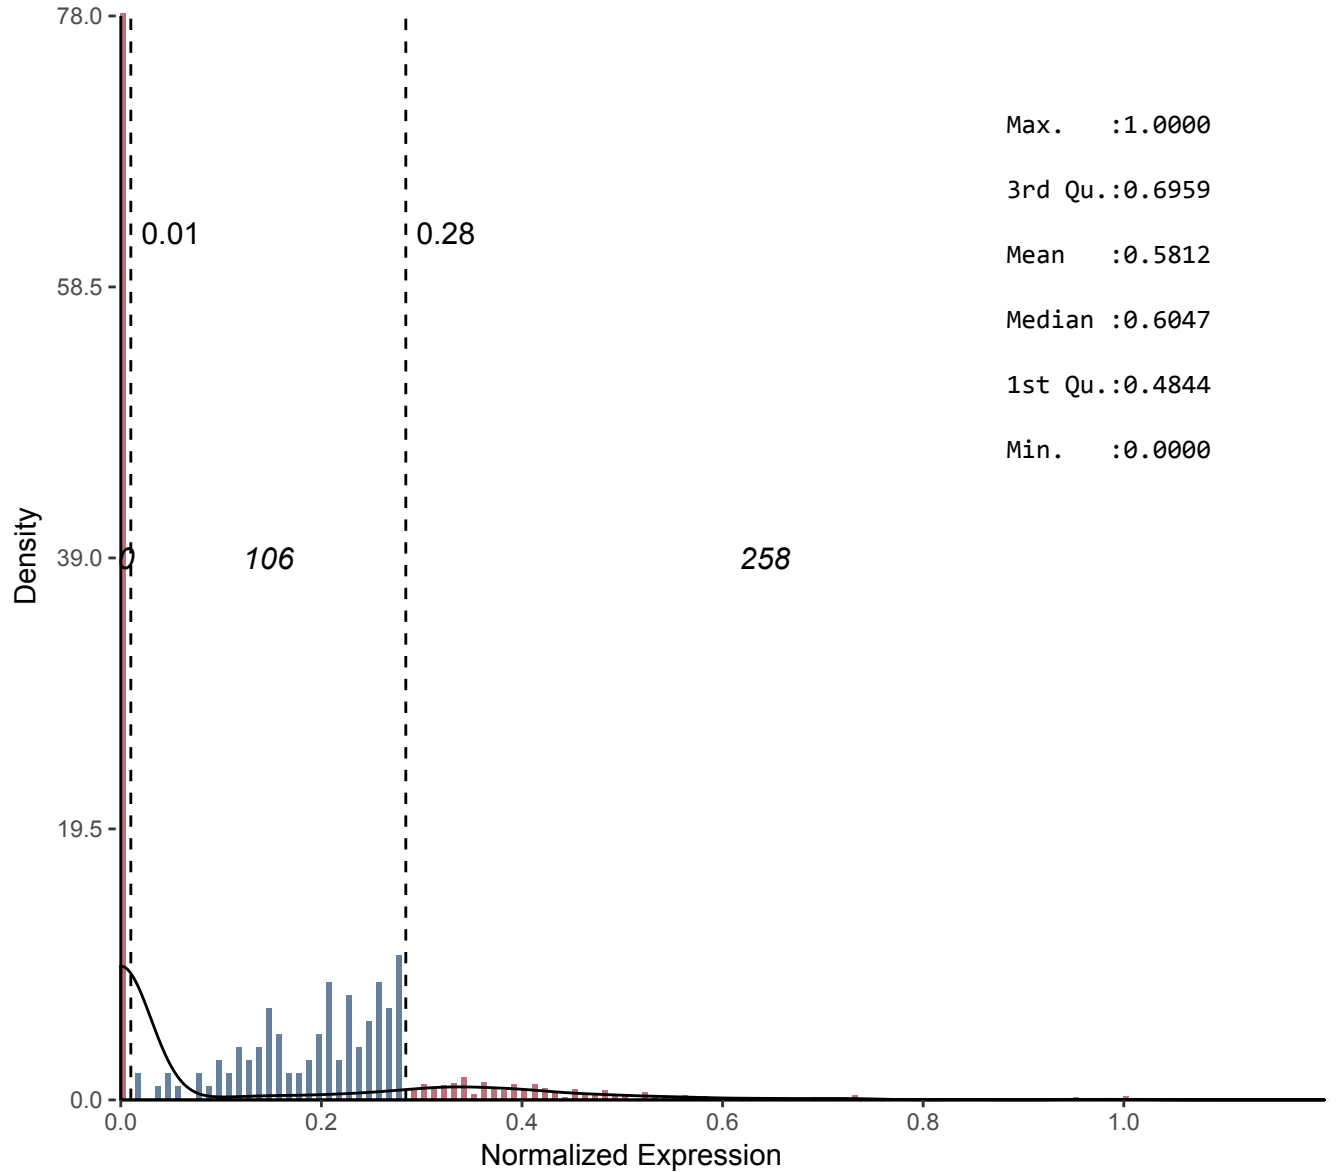

Aberrant TRUE FALSE



Figure 128 - CD110

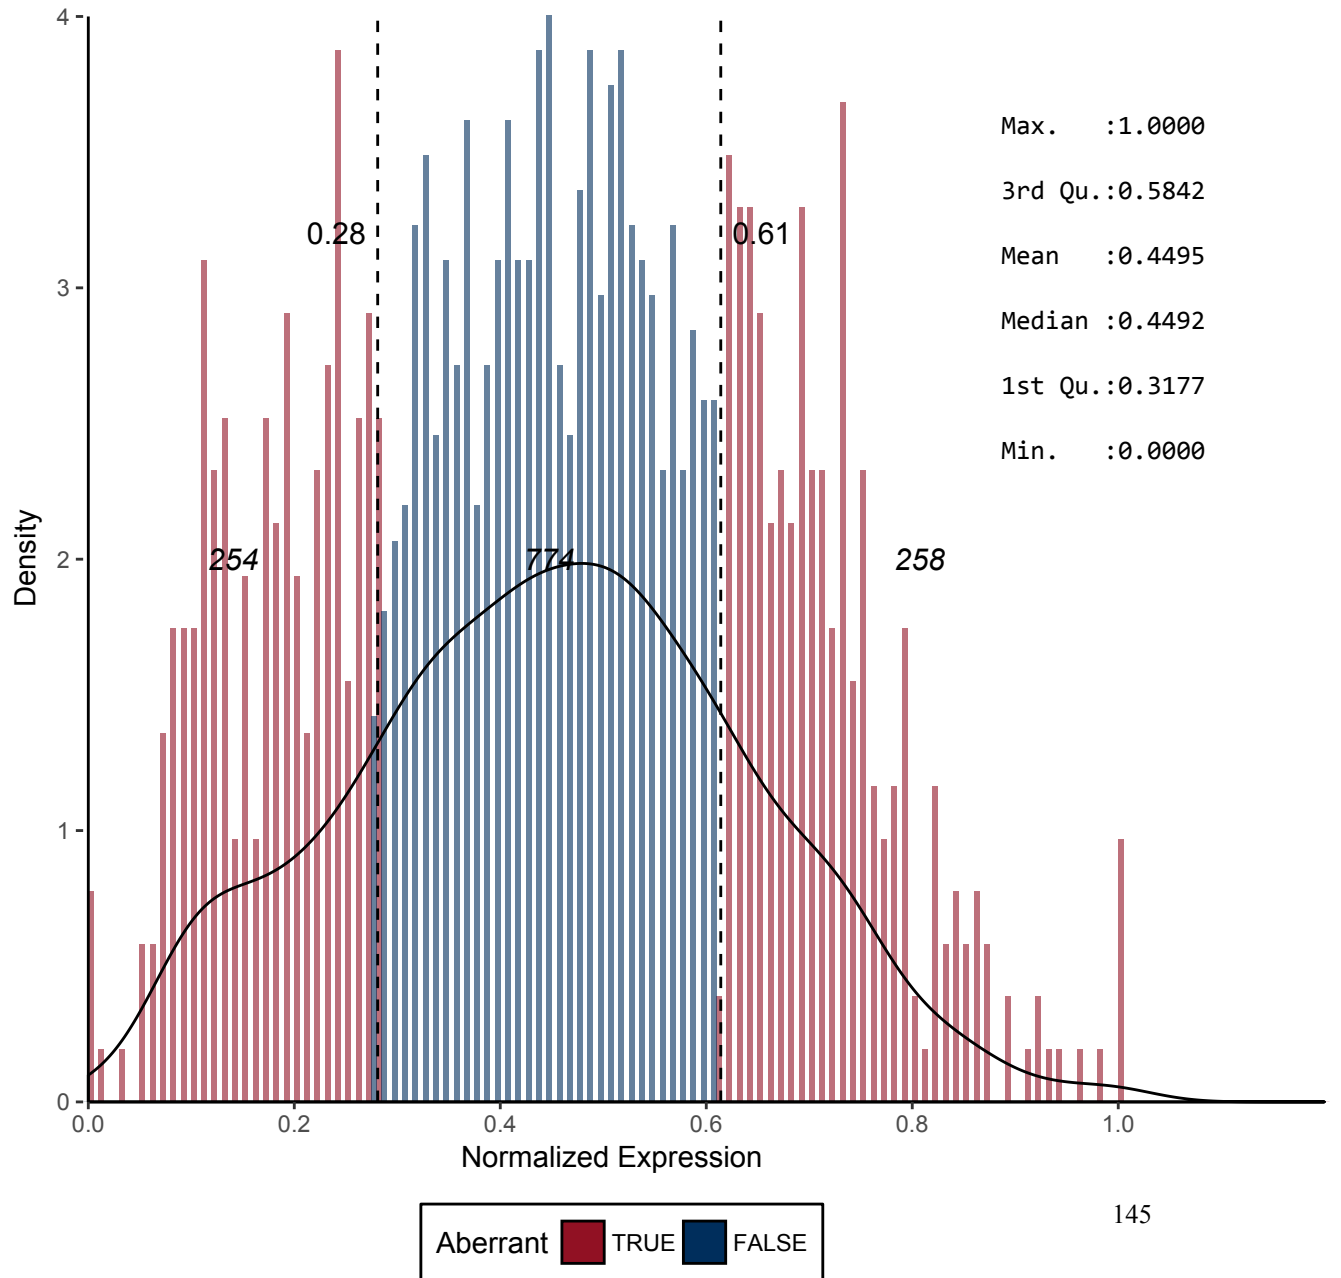

Figure 129 - CD111\*

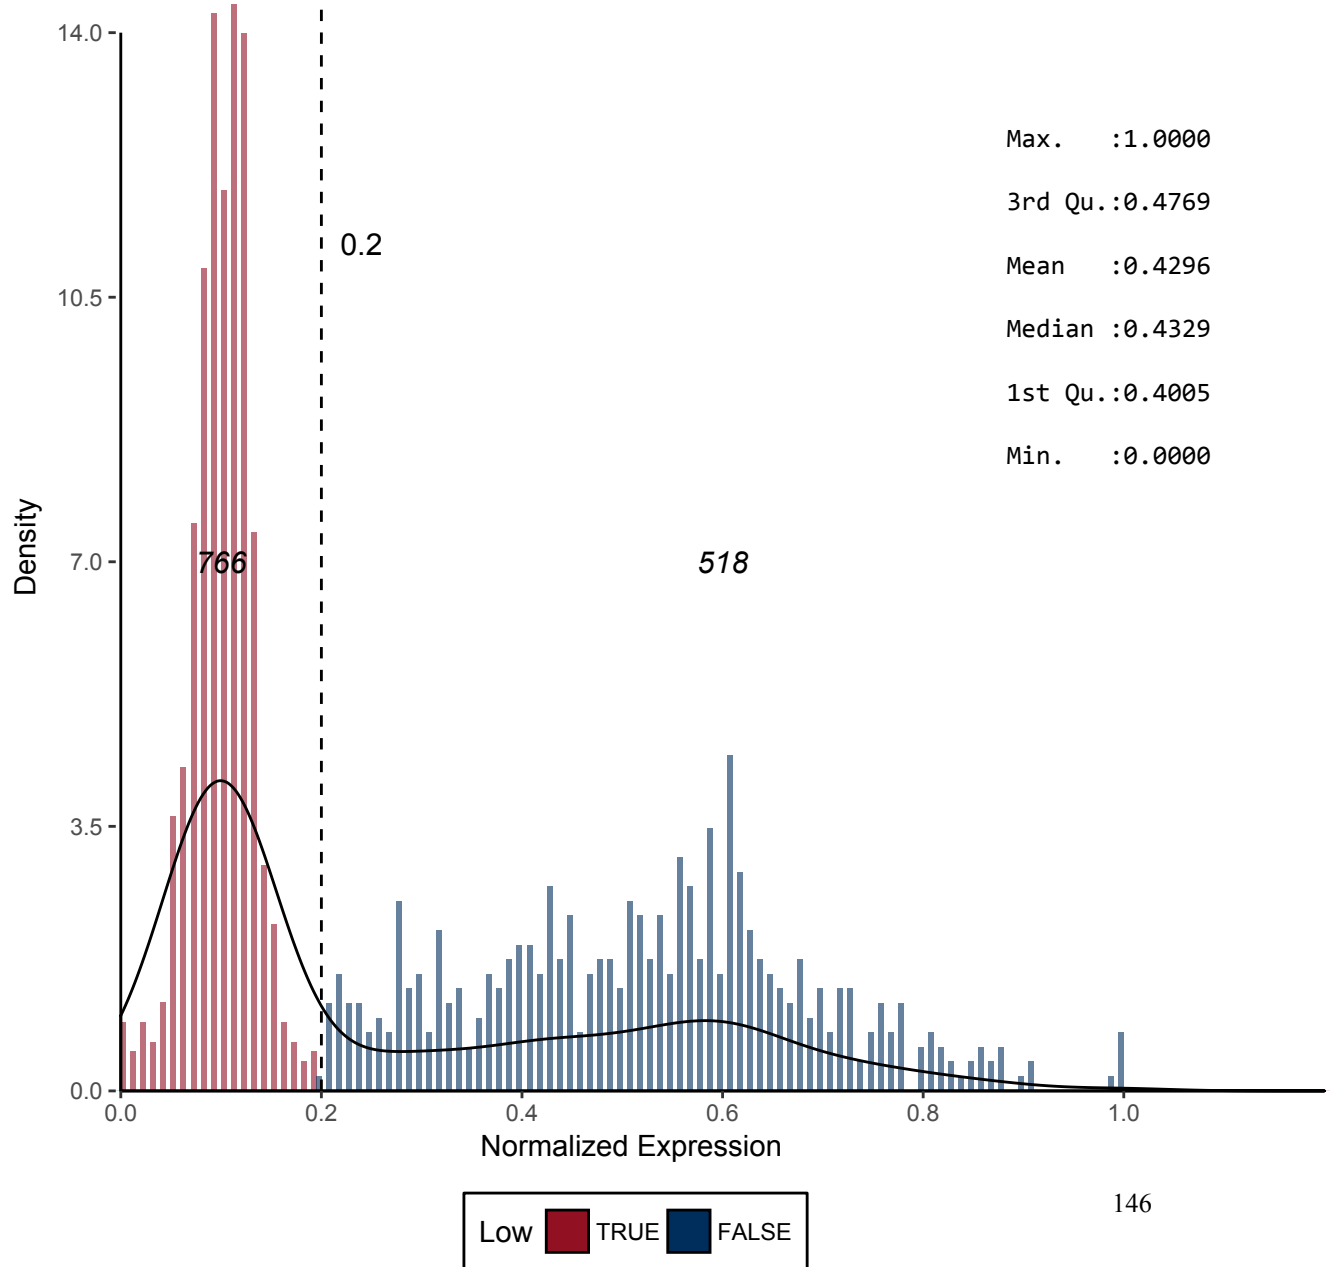

Figure 130 - CD112

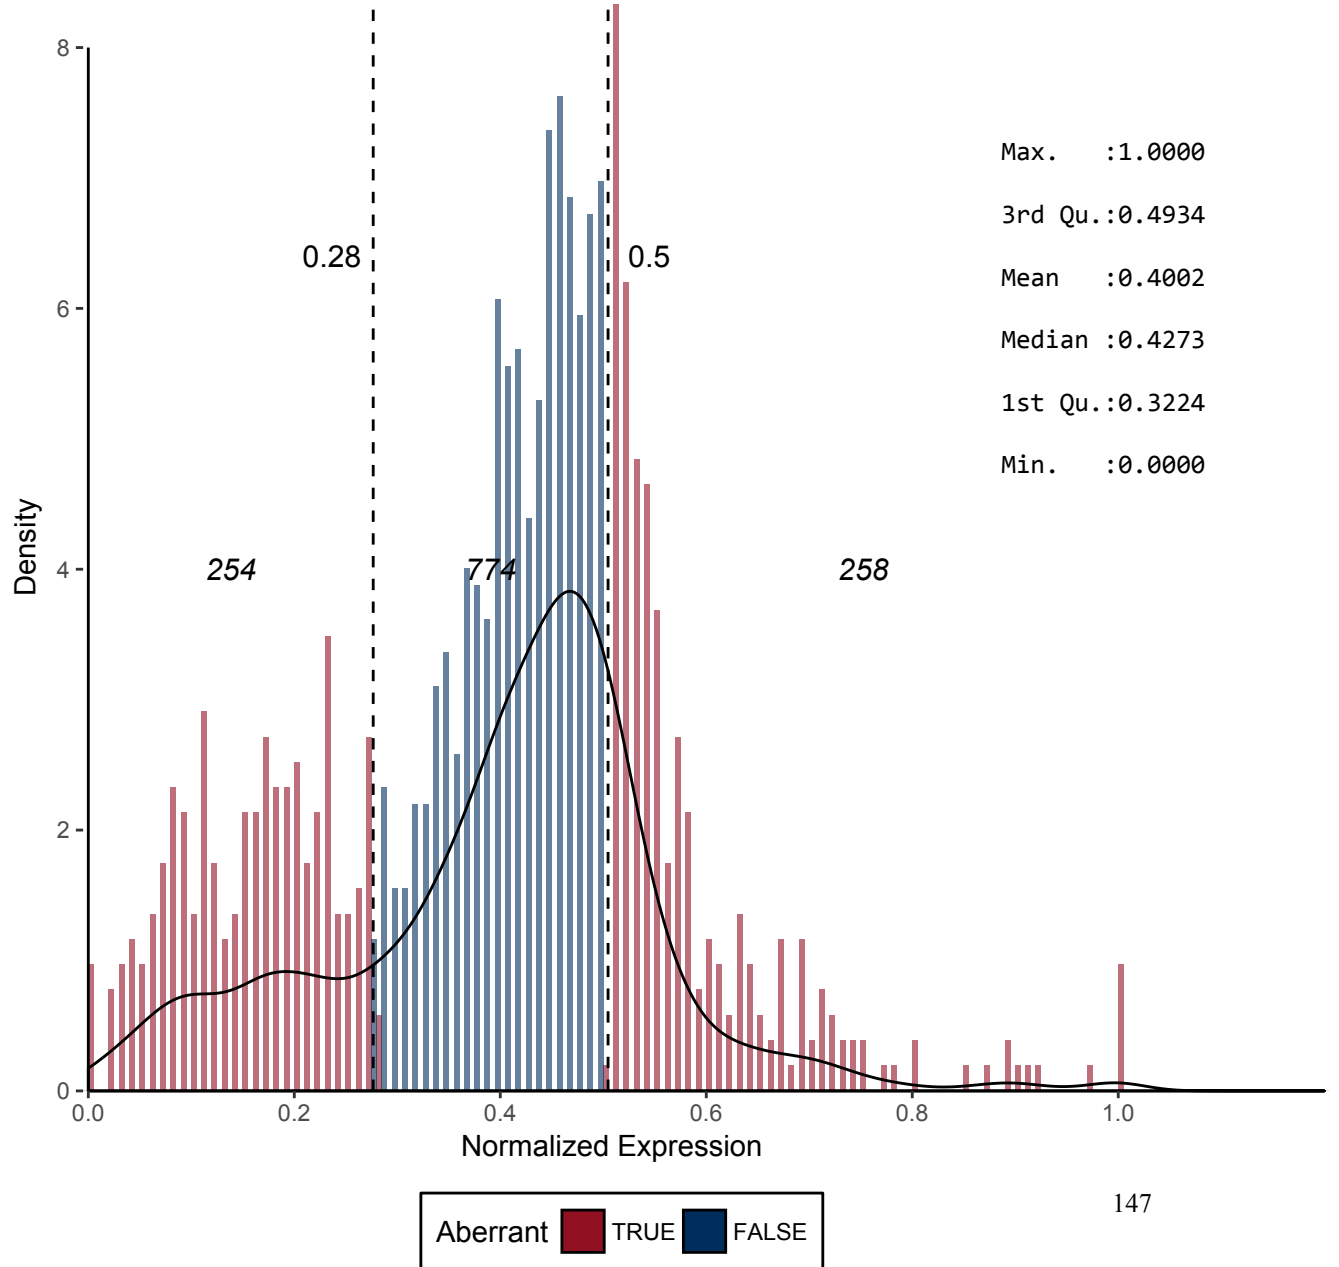

Figure 131 - CD113\*

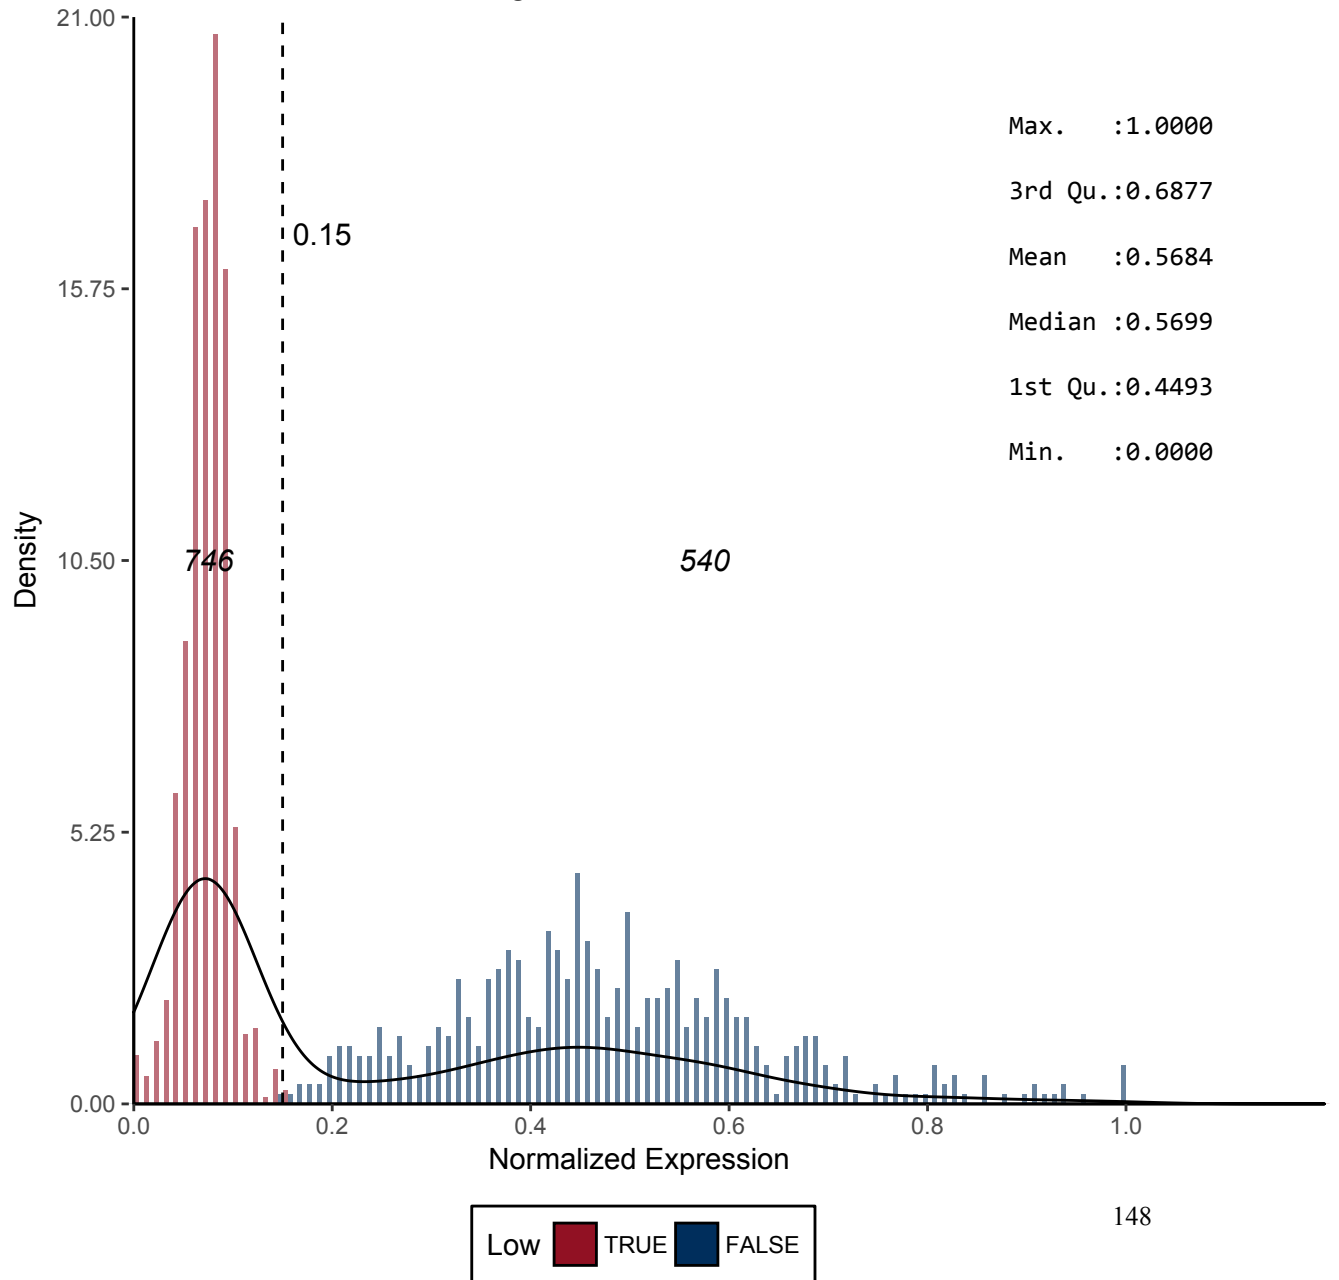

Figure 132 - CD114

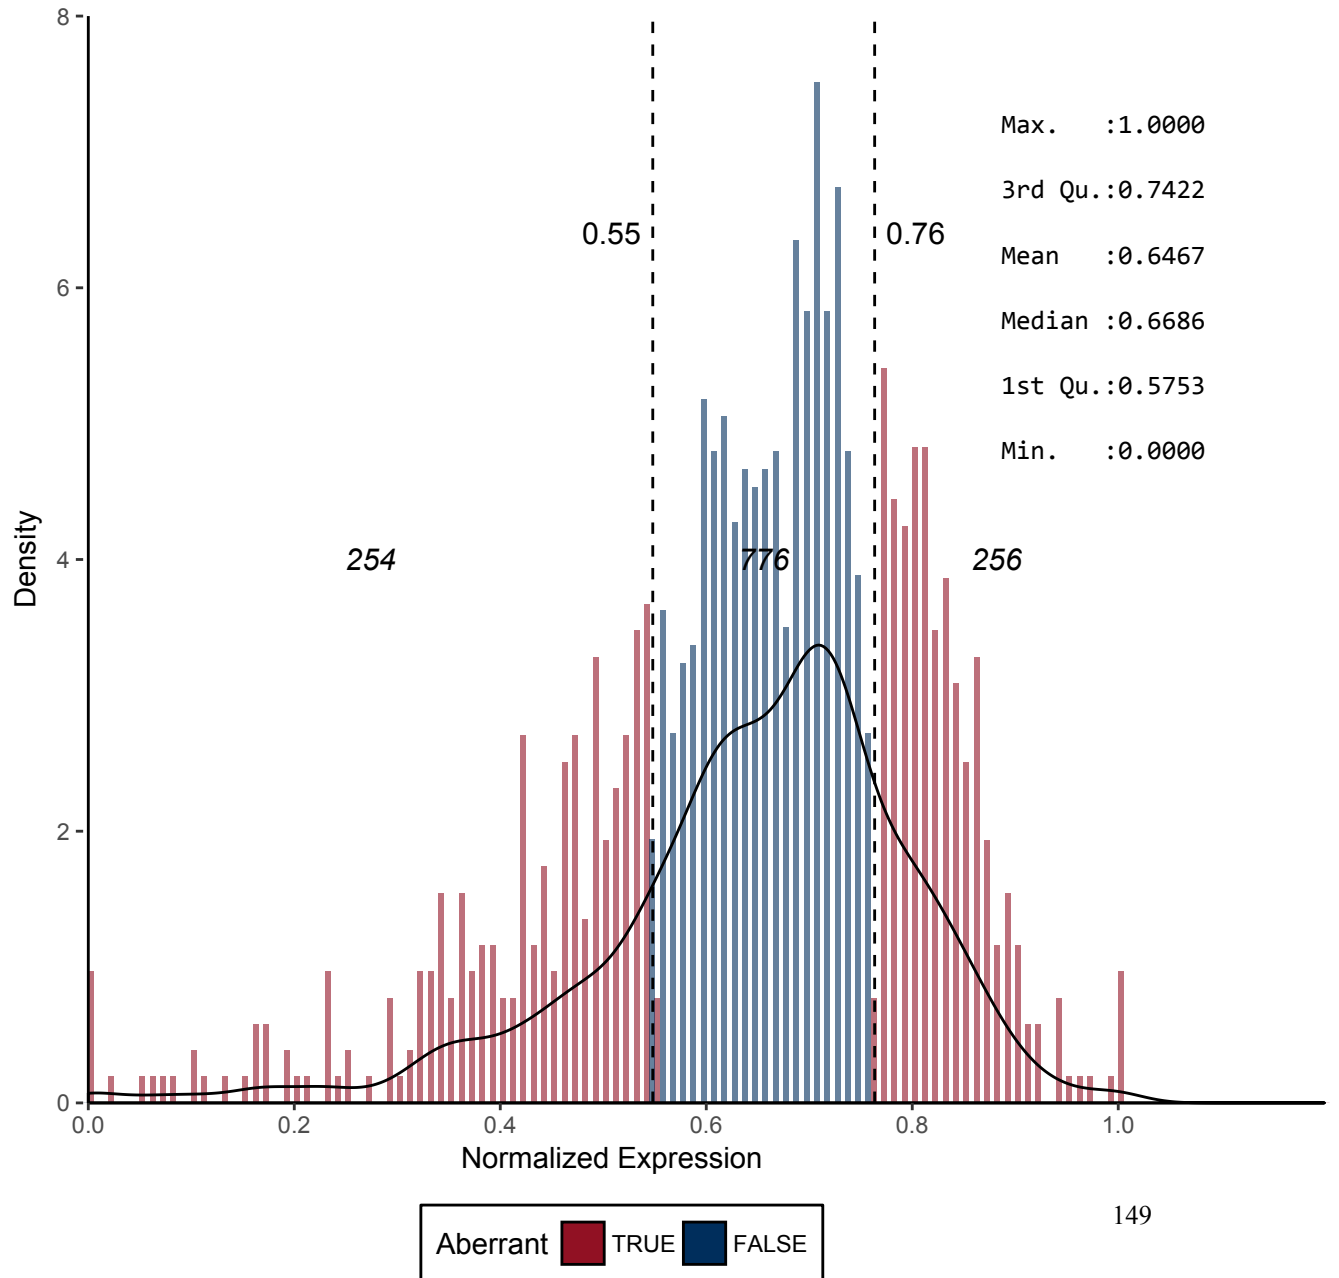

Figure 133 - CD115

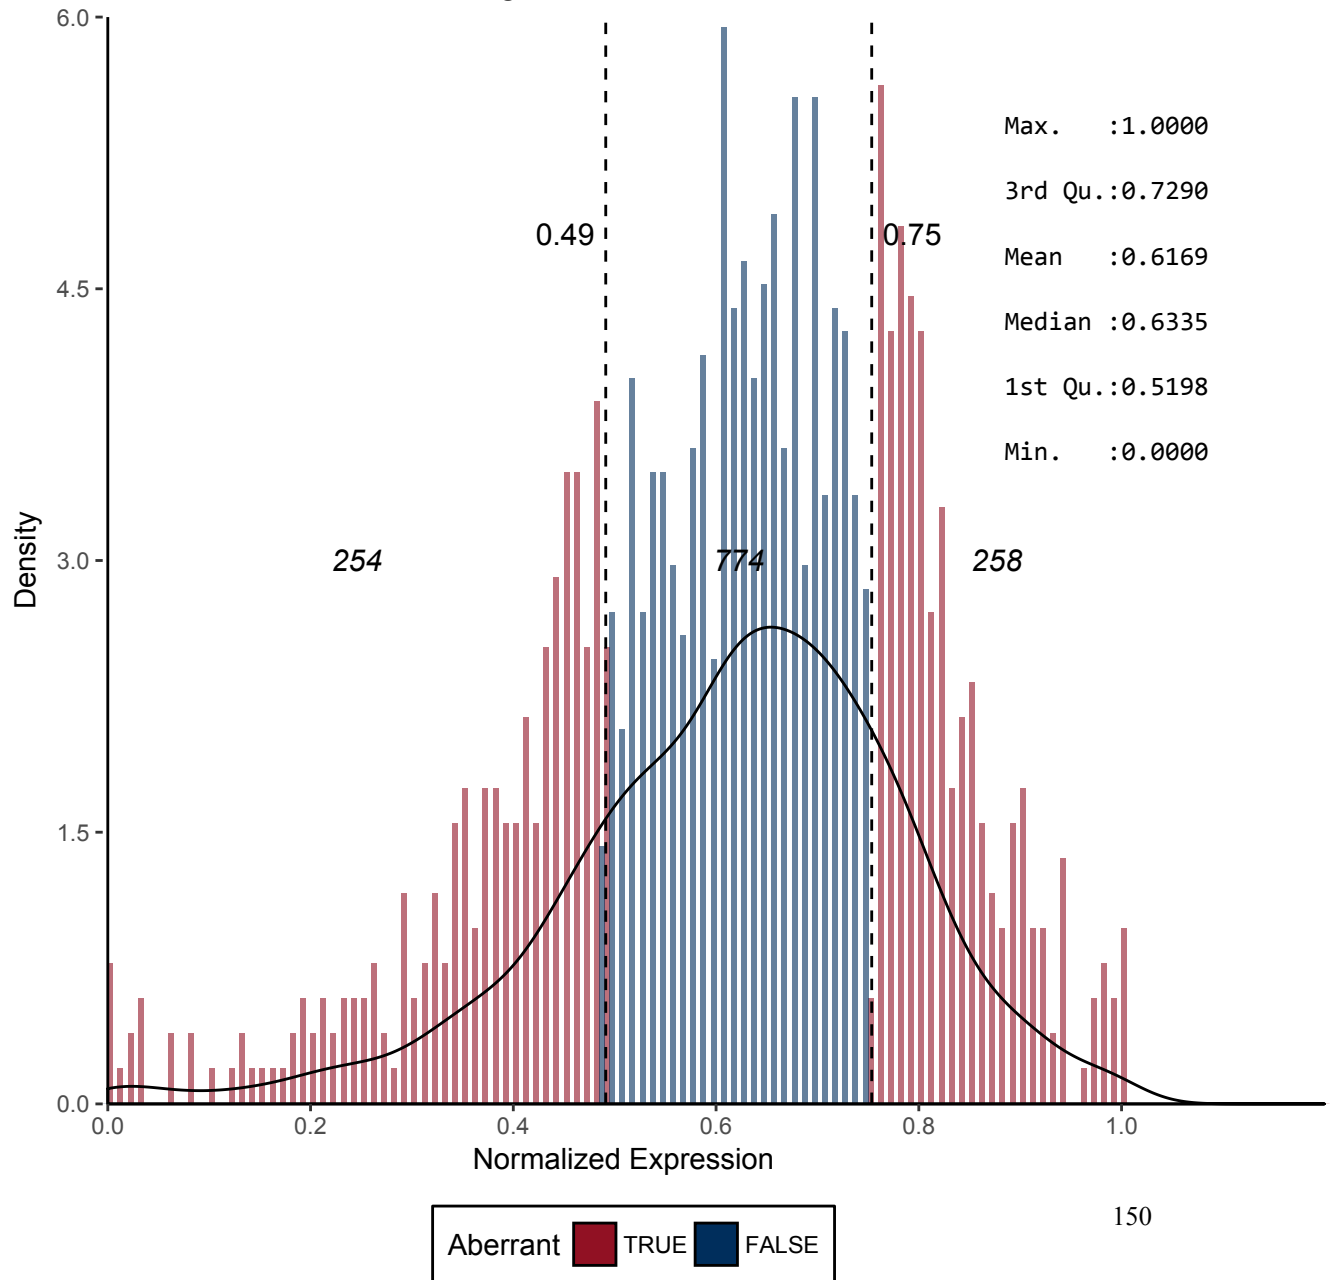

Figure 134 - CD116

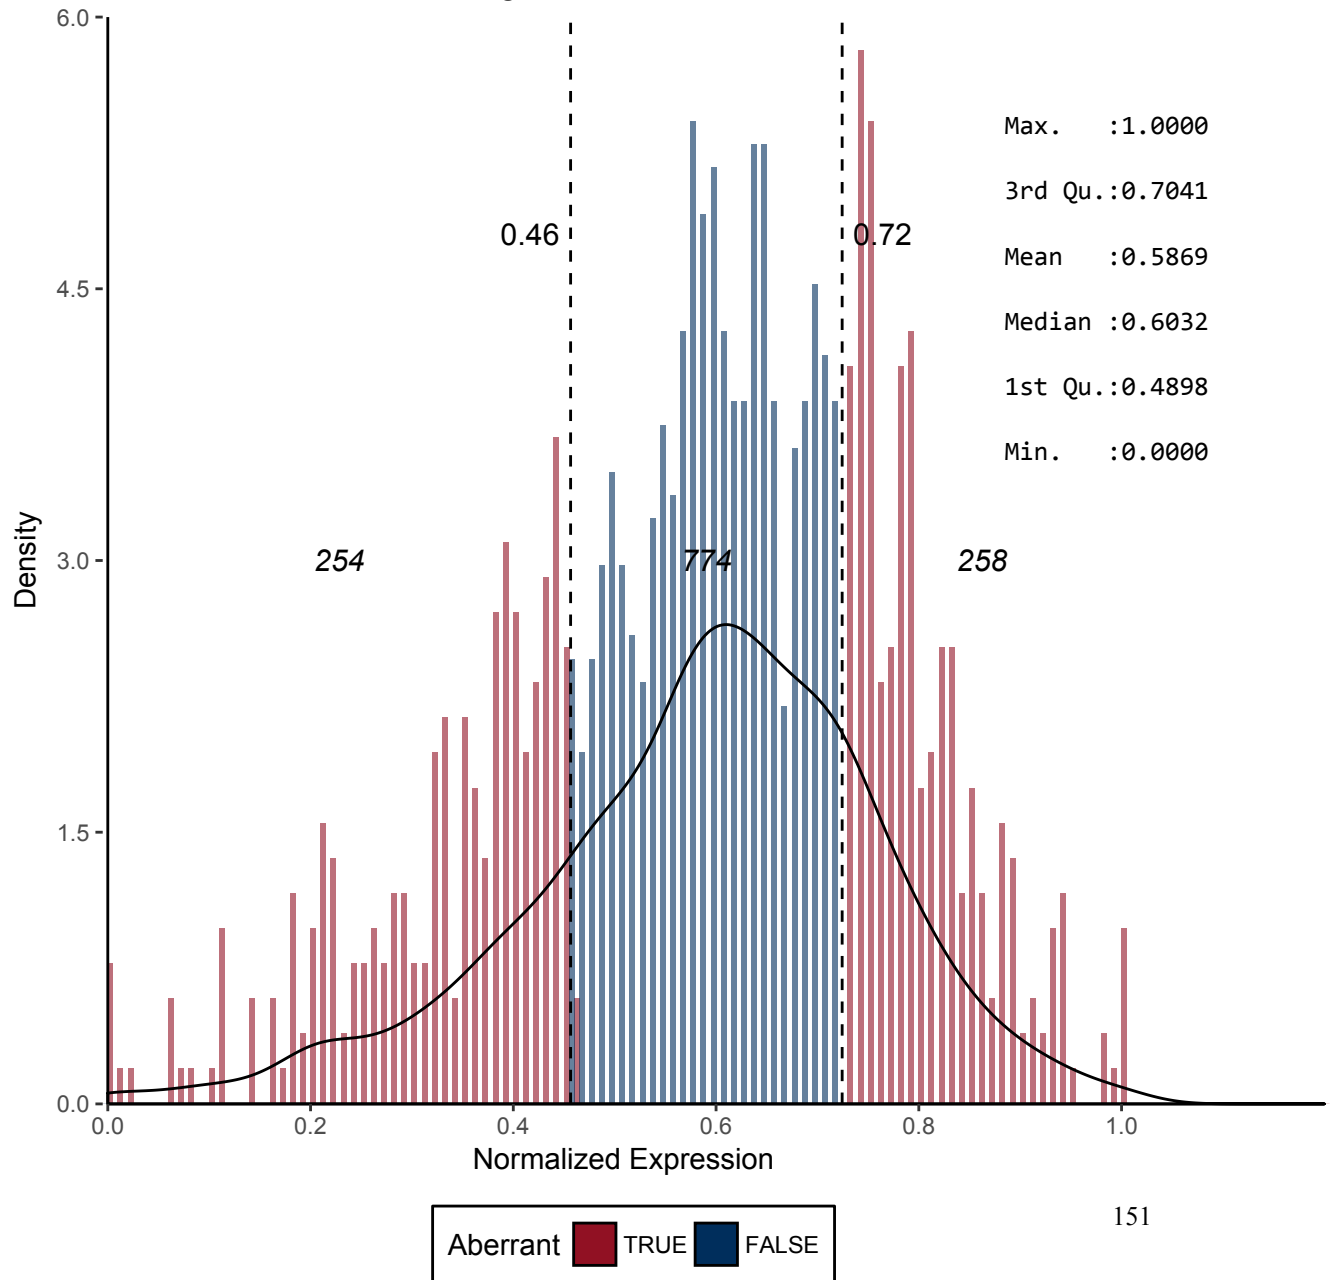

Figure 135 - CD117

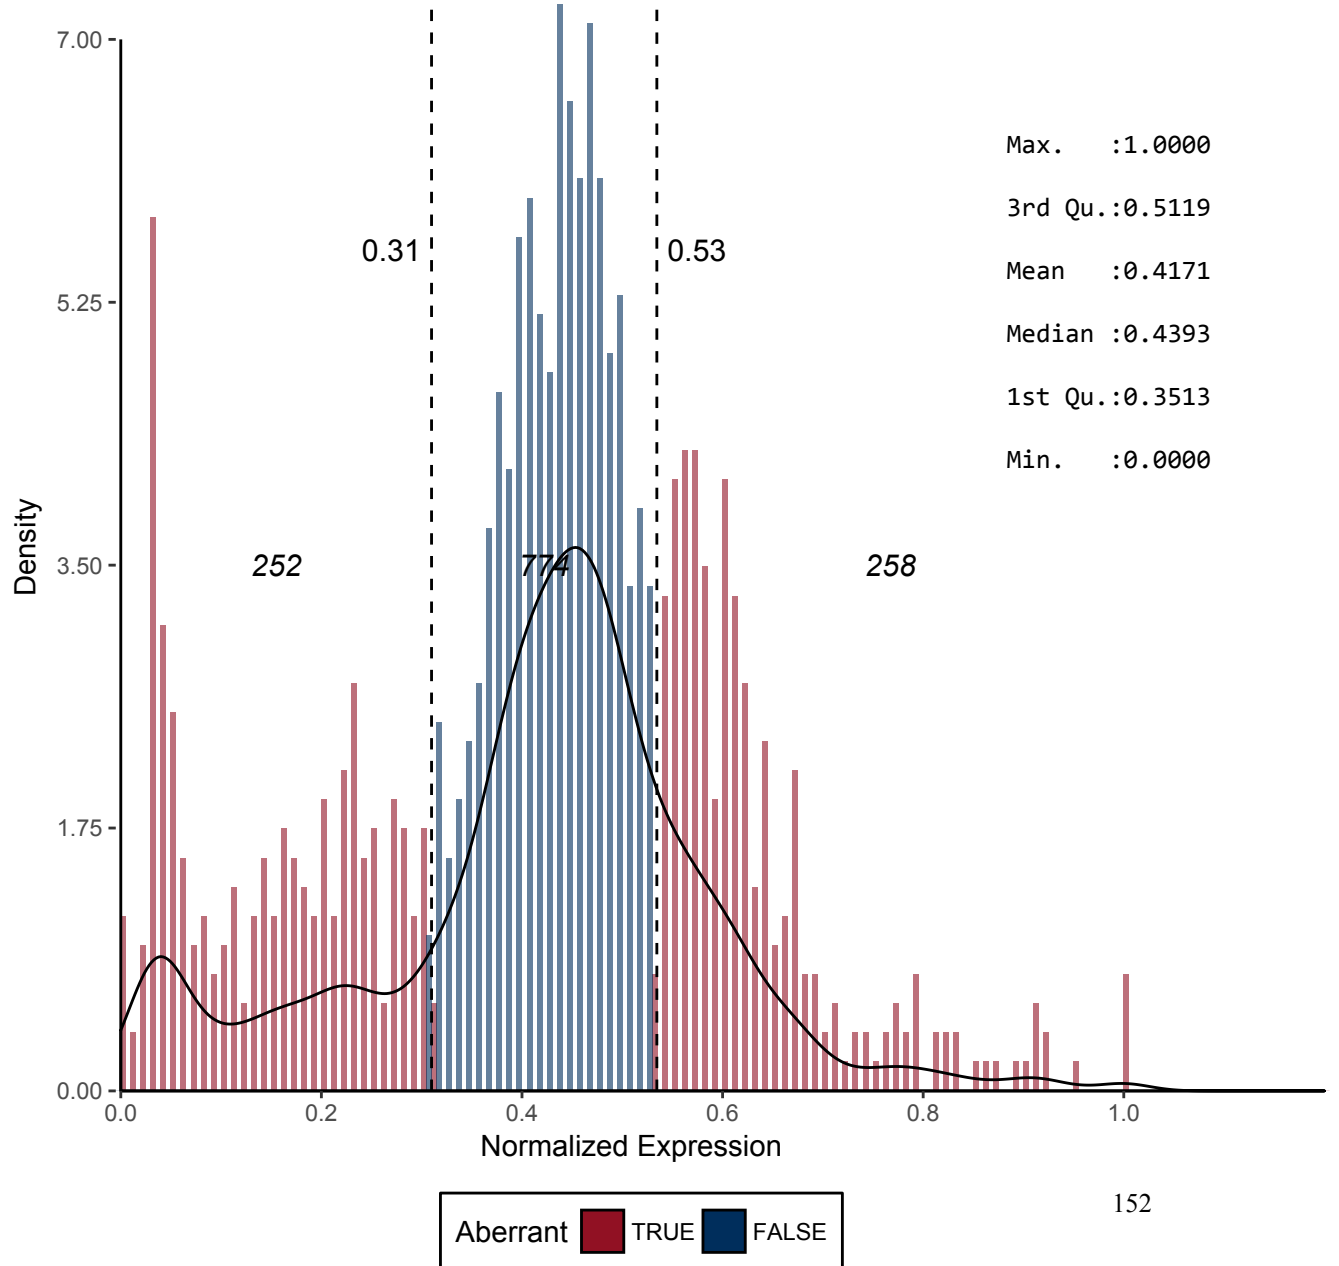



Figure 136 - CD118\*

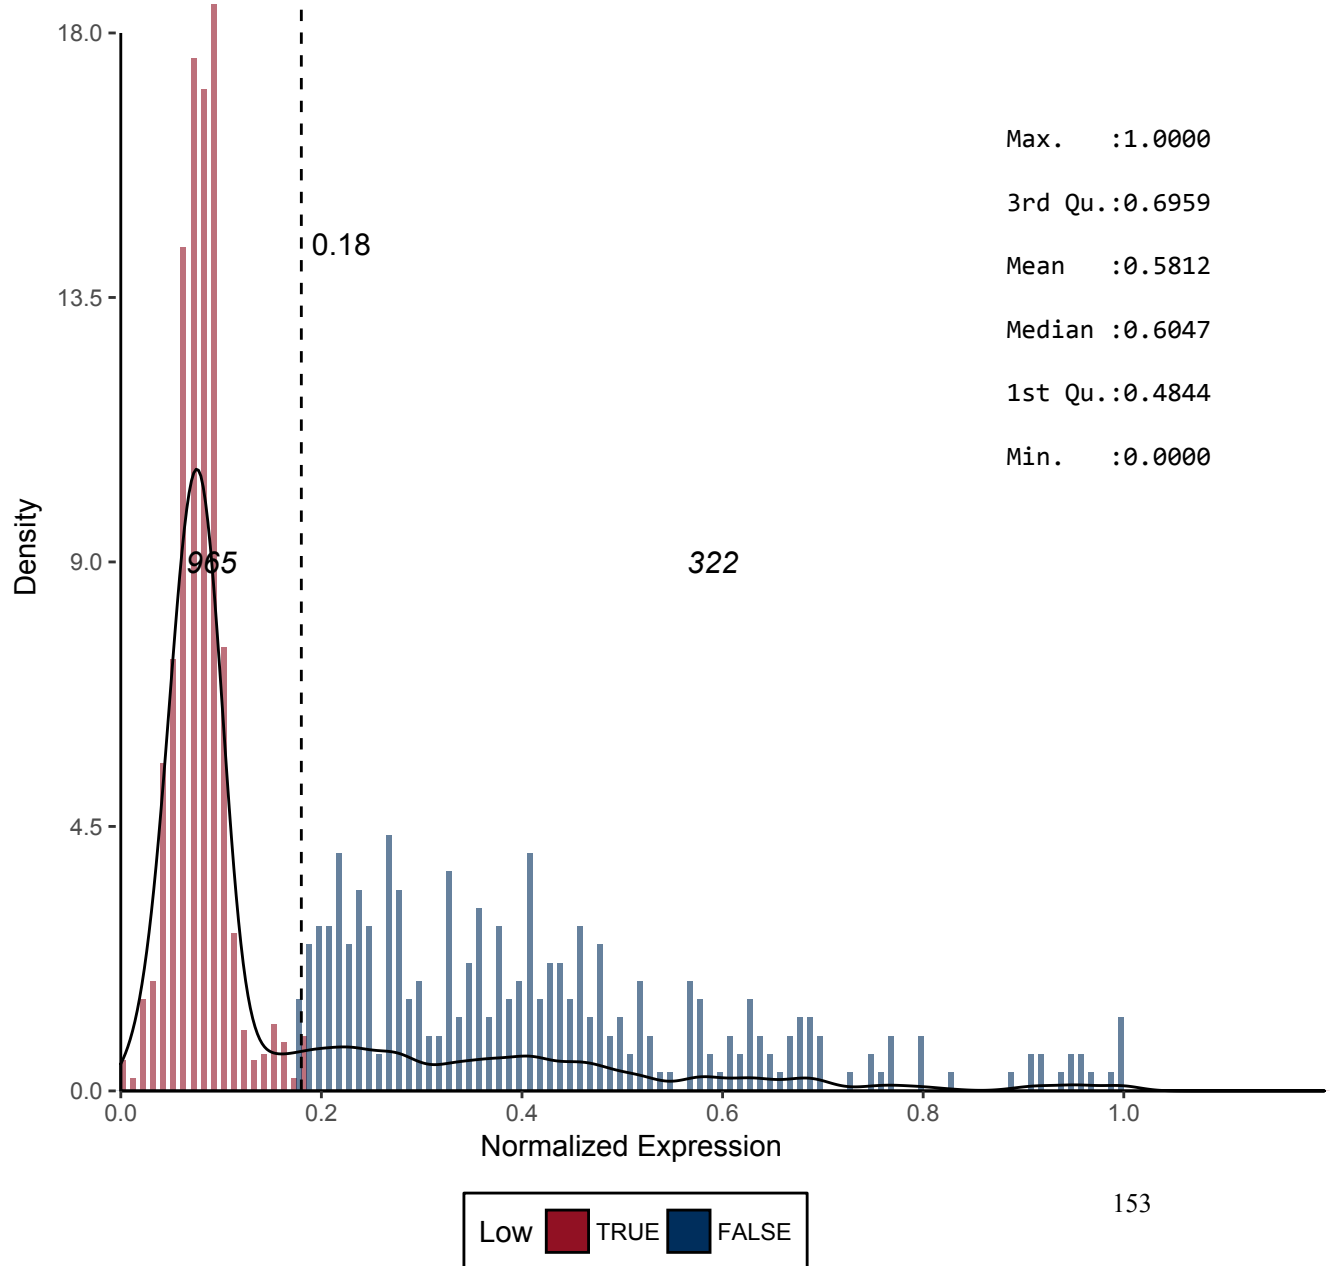

Figure 137 - CD119

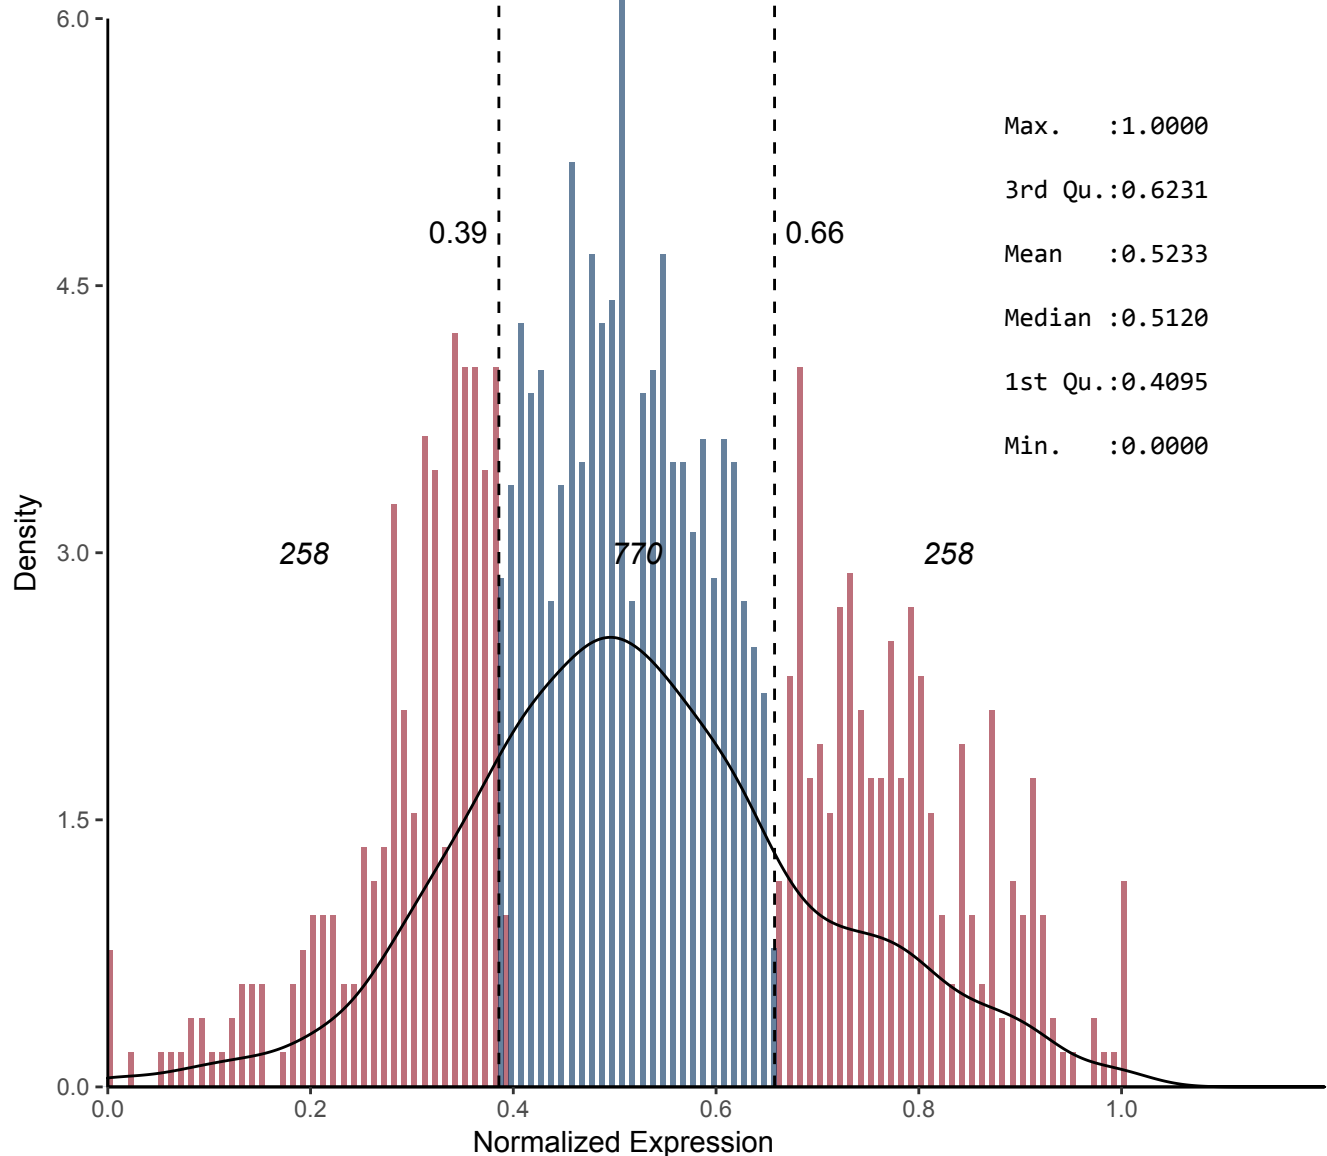

Figure 138 - CD120A

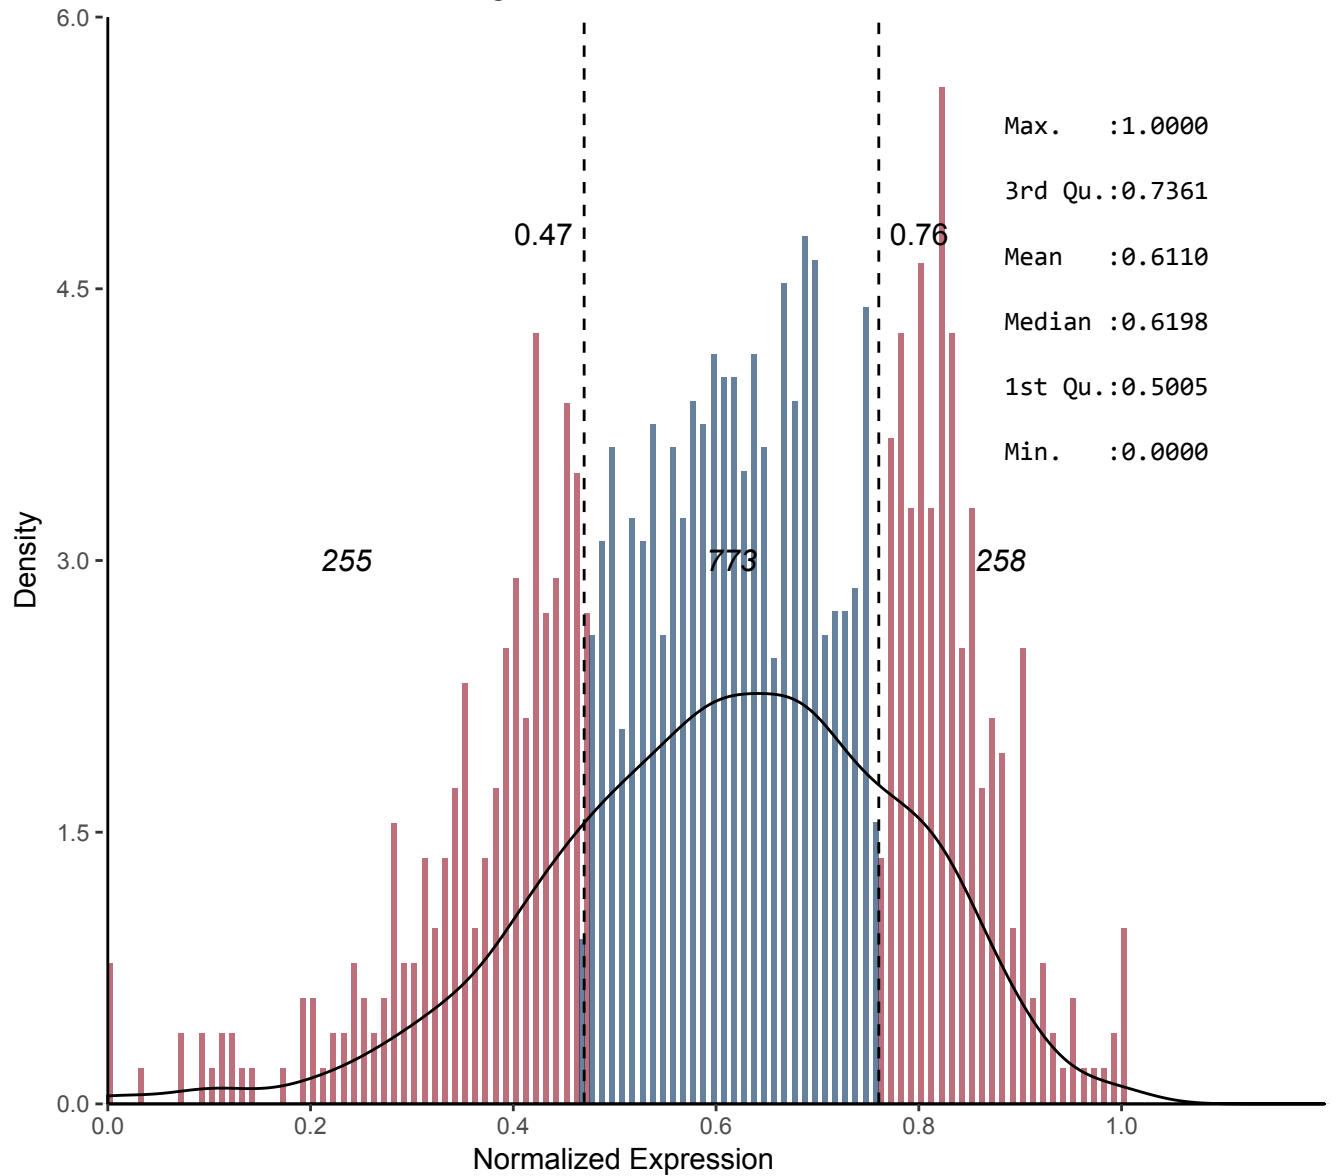

Aberrant TRUE FALSE

Figure 139 - CD120B

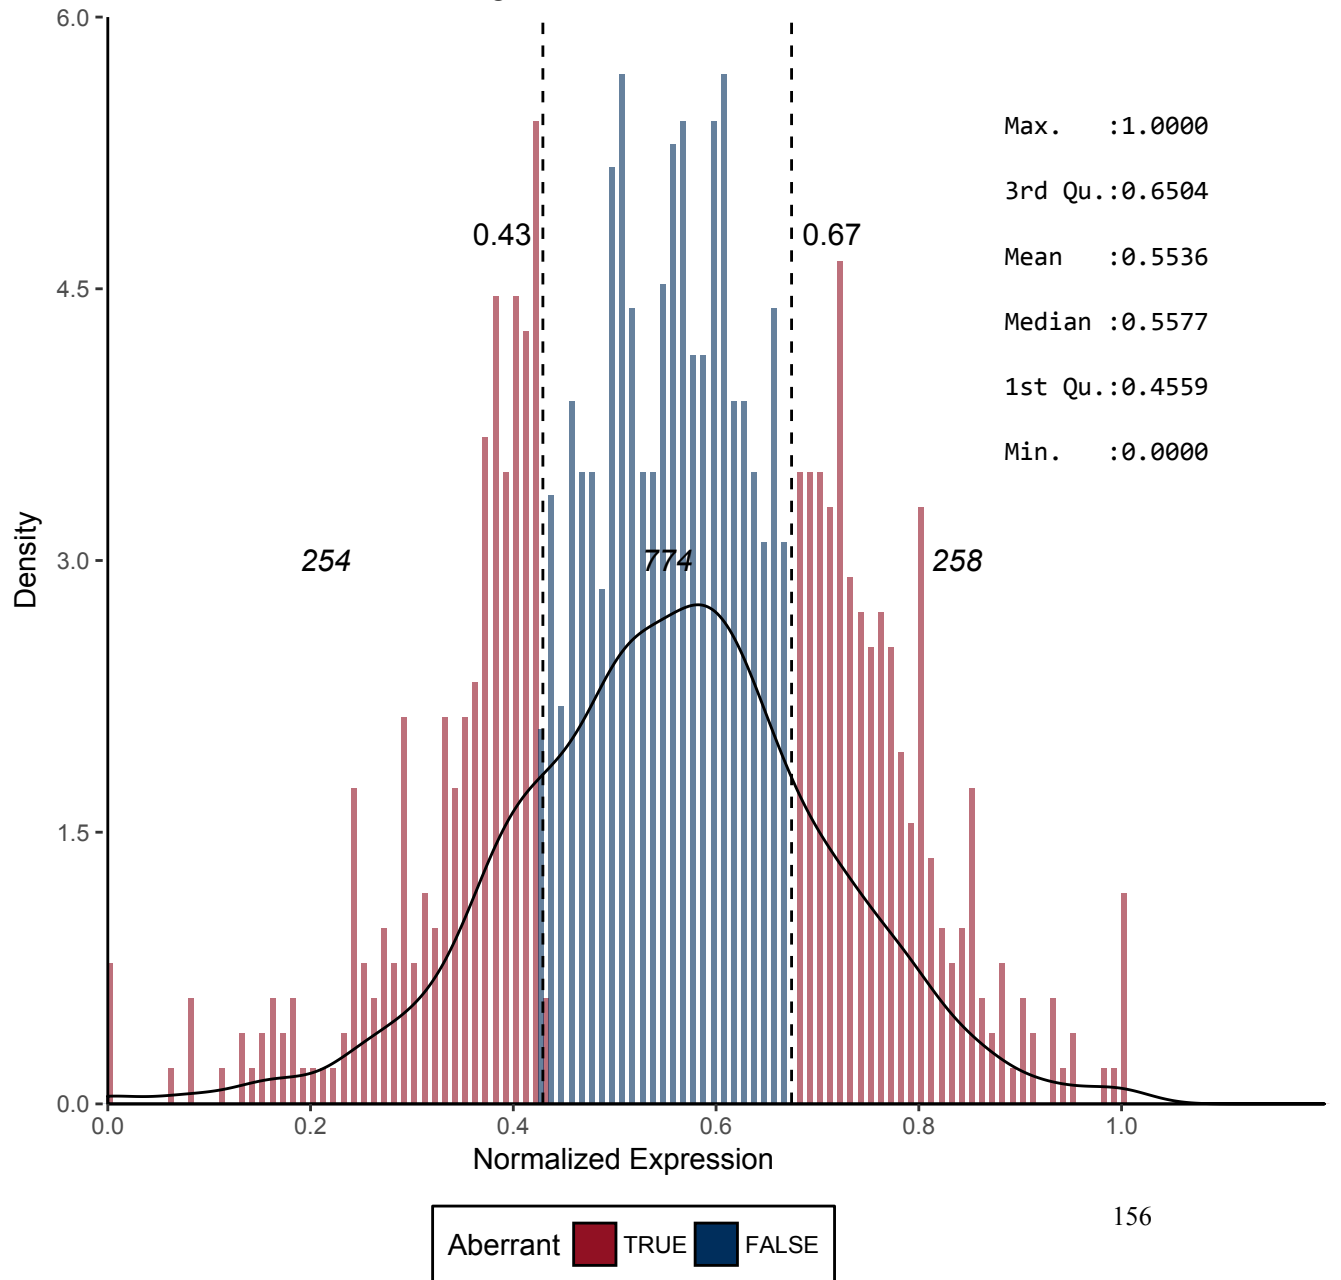

Figure 140 - CD121A\*

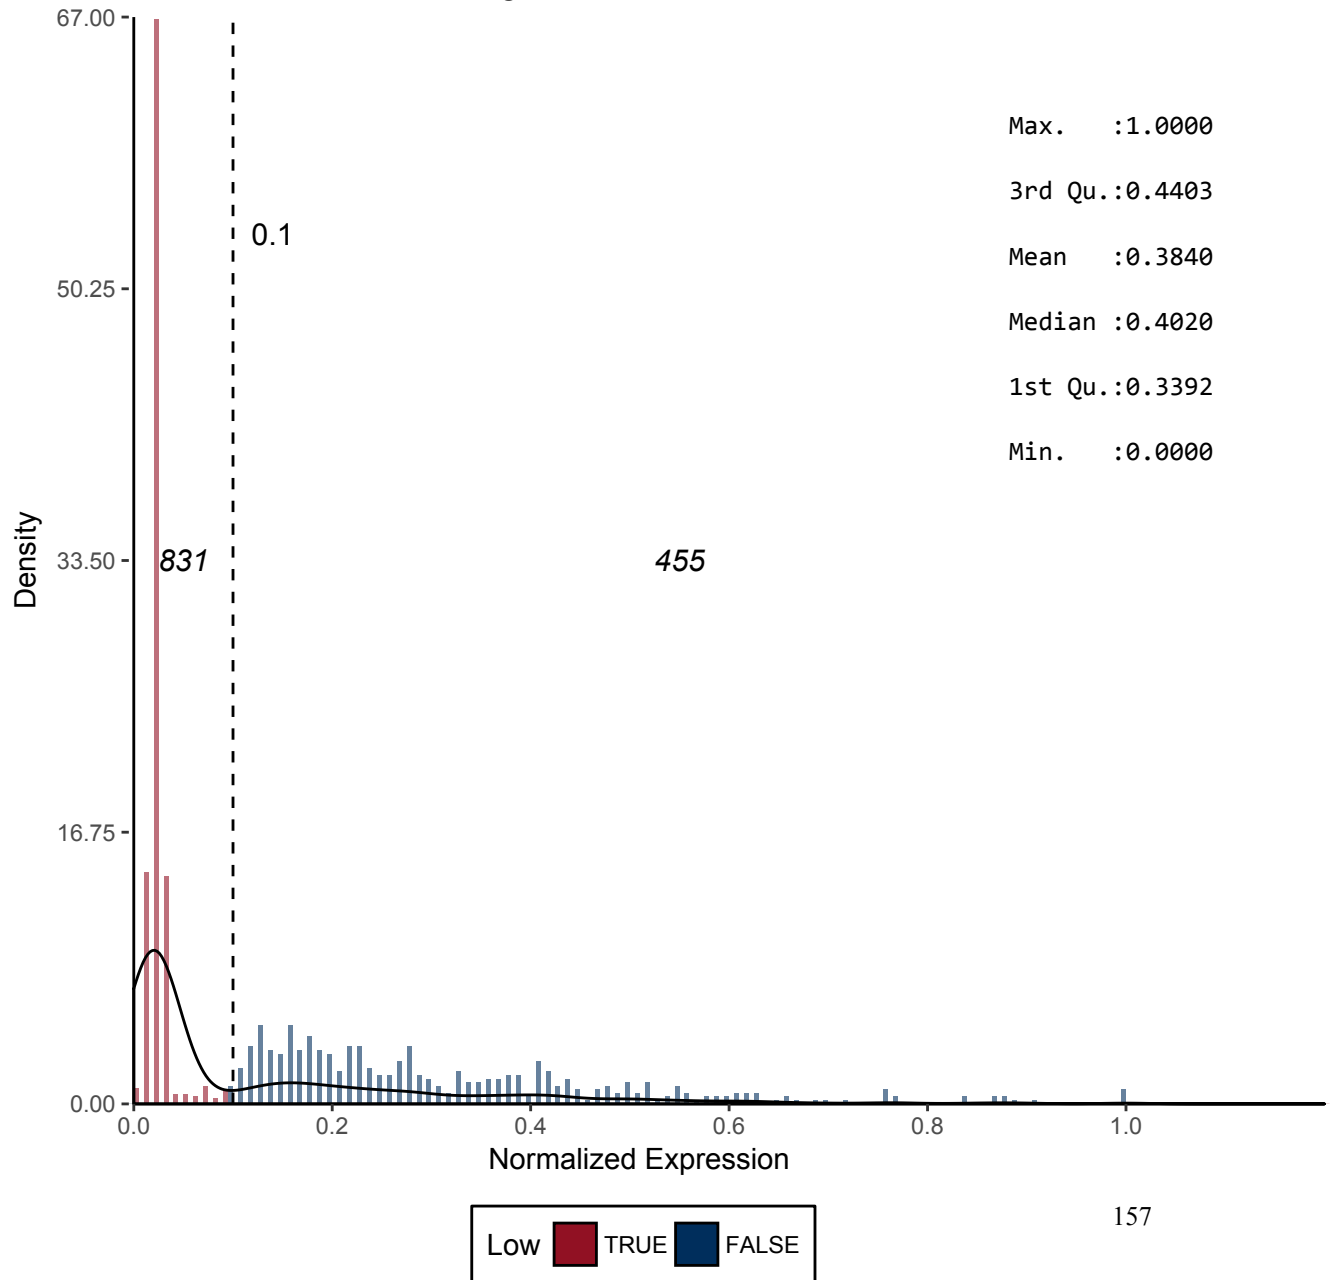

Figure 141 - CD121B

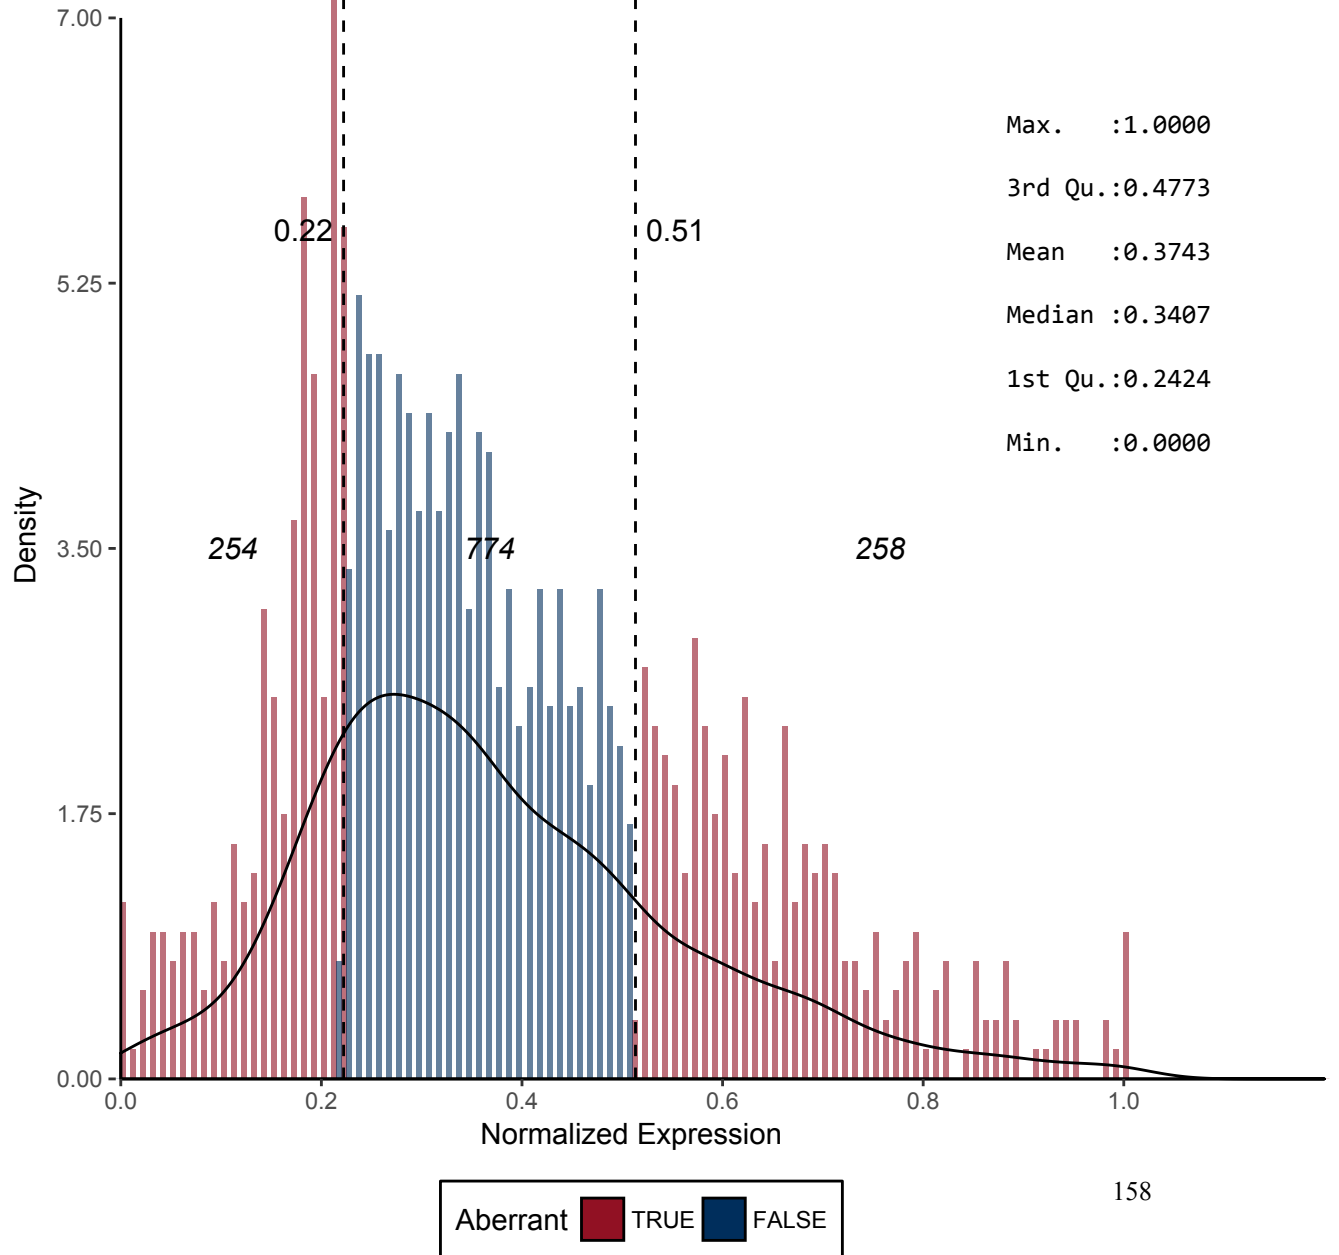

Figure 142 - CD122

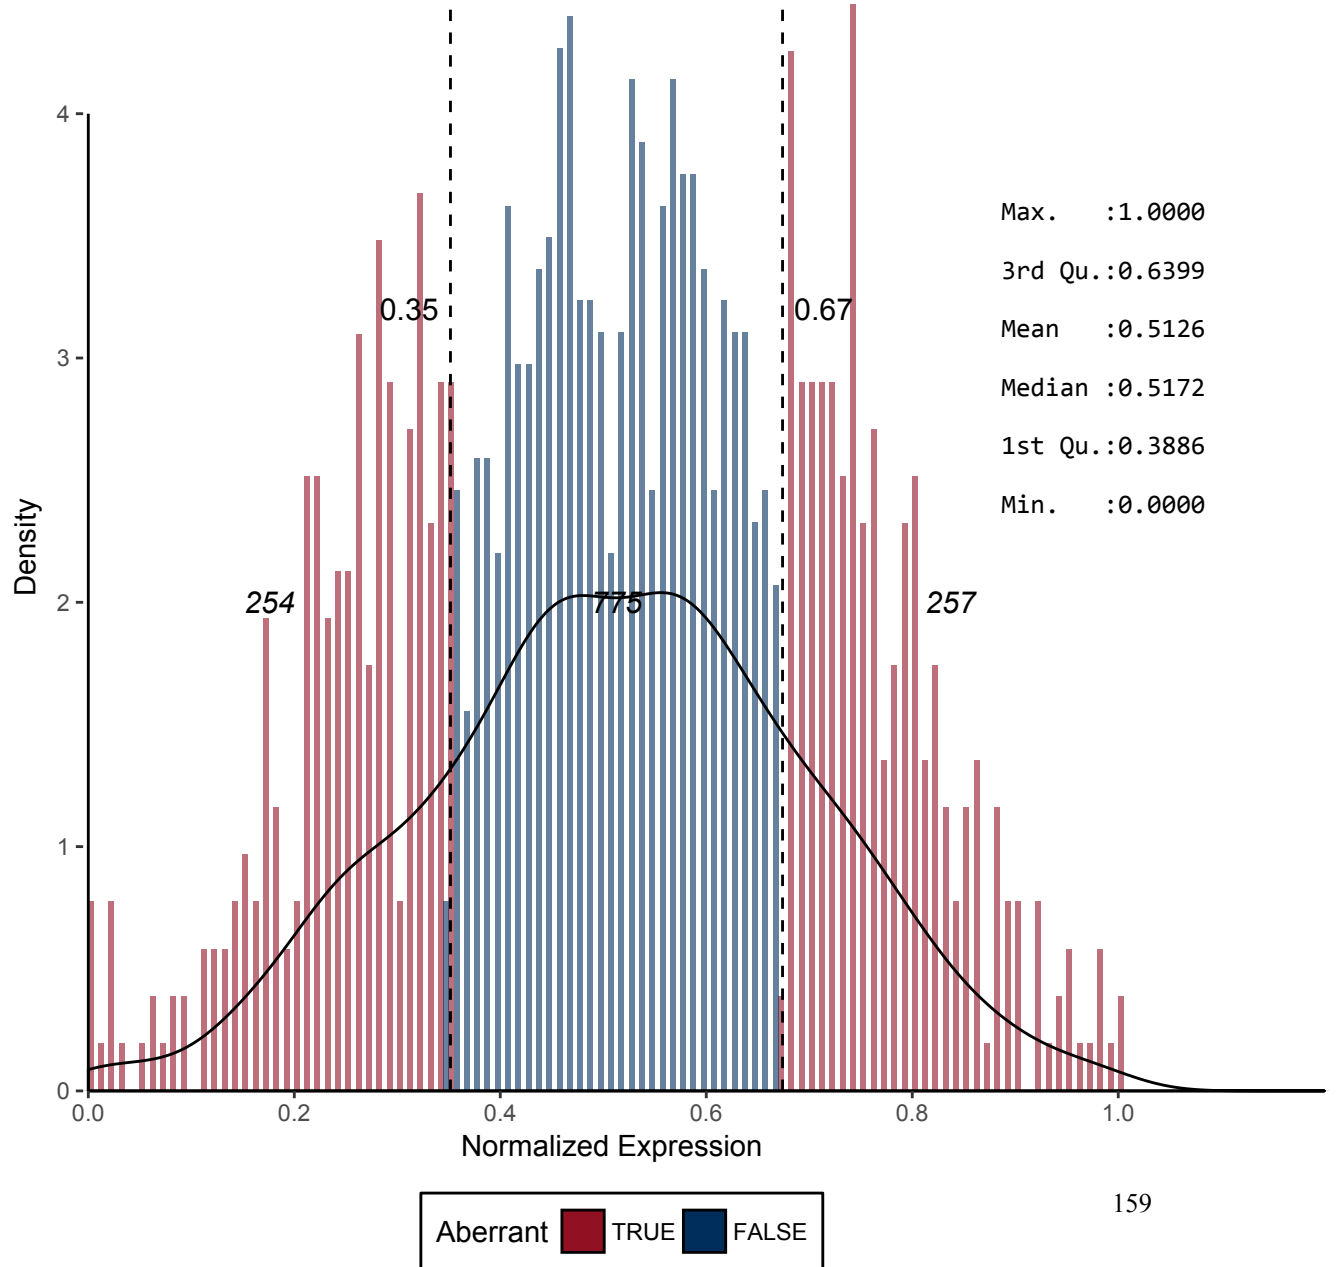

Figure 143 - CD123

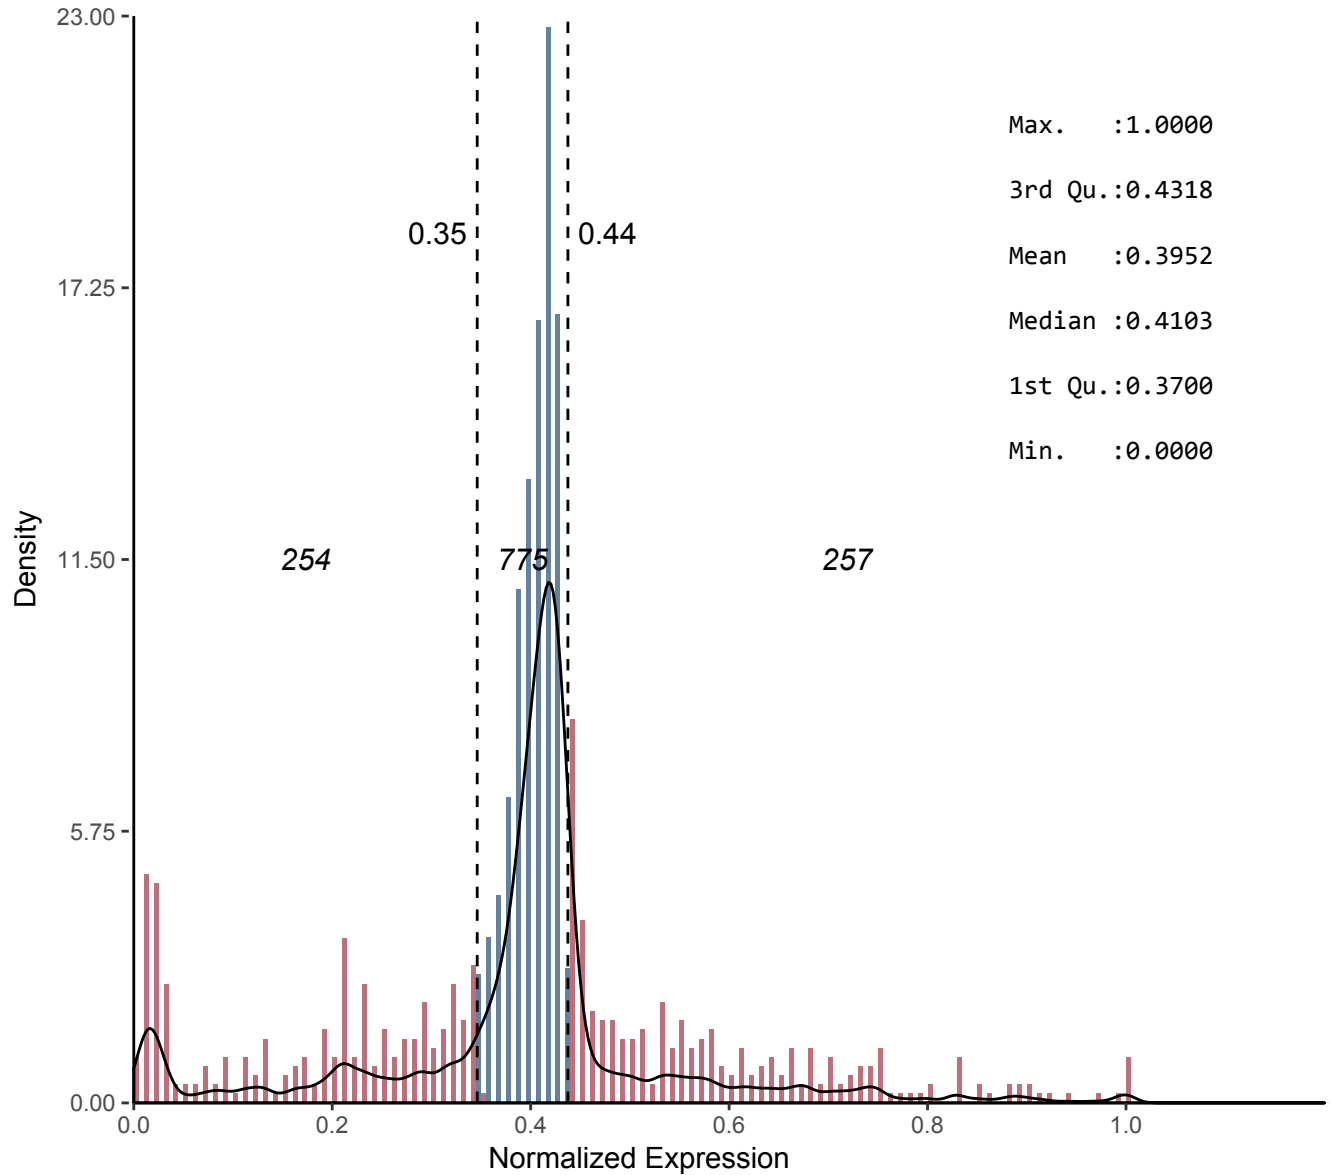

Aberrant ■ TRUE ■ FALSE



Figure 144 - CD124

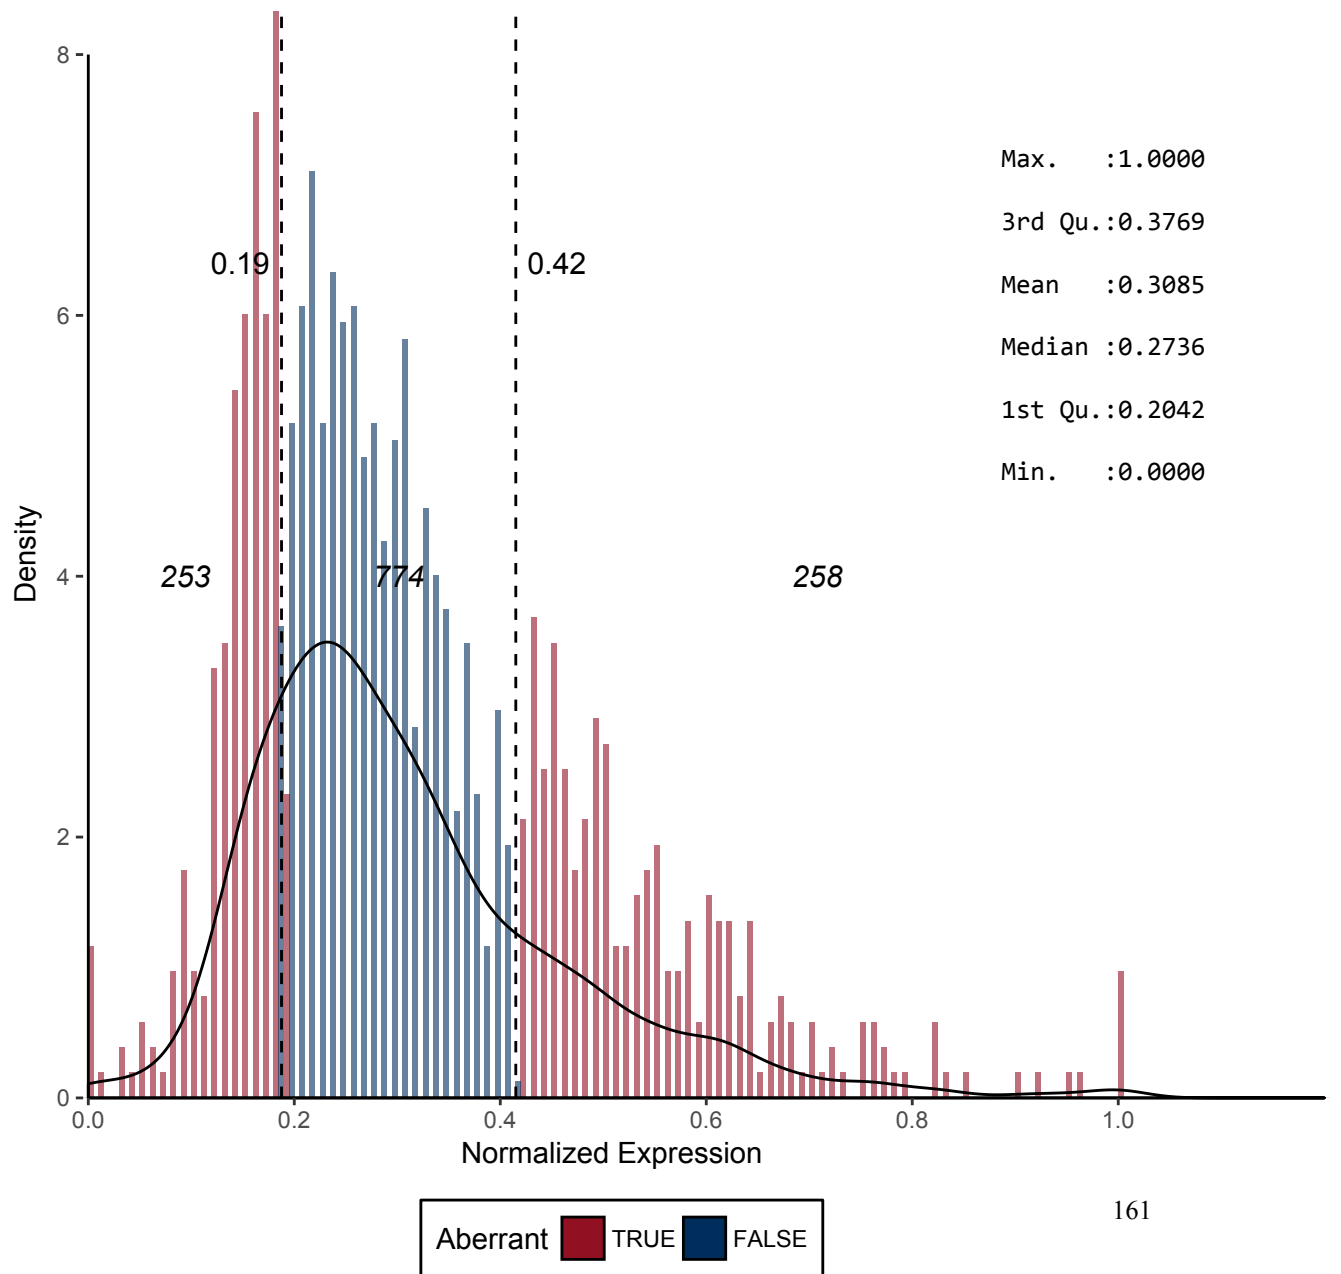

Figure 145 - CD125

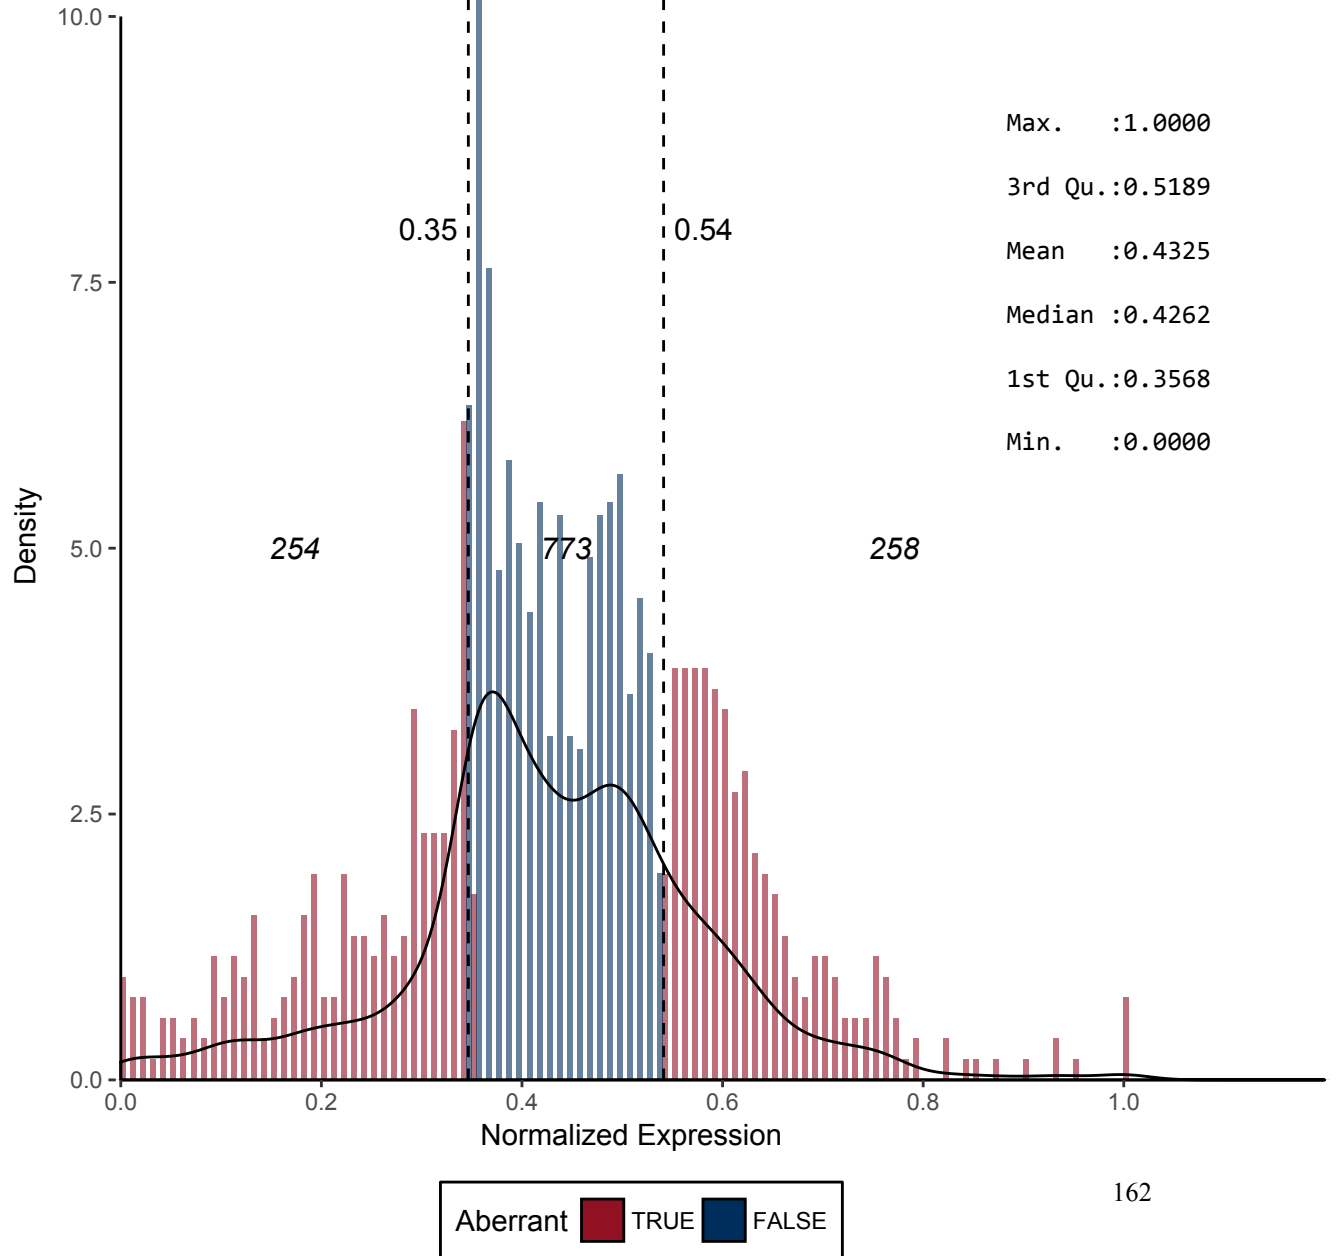

Figure 146 - CD126

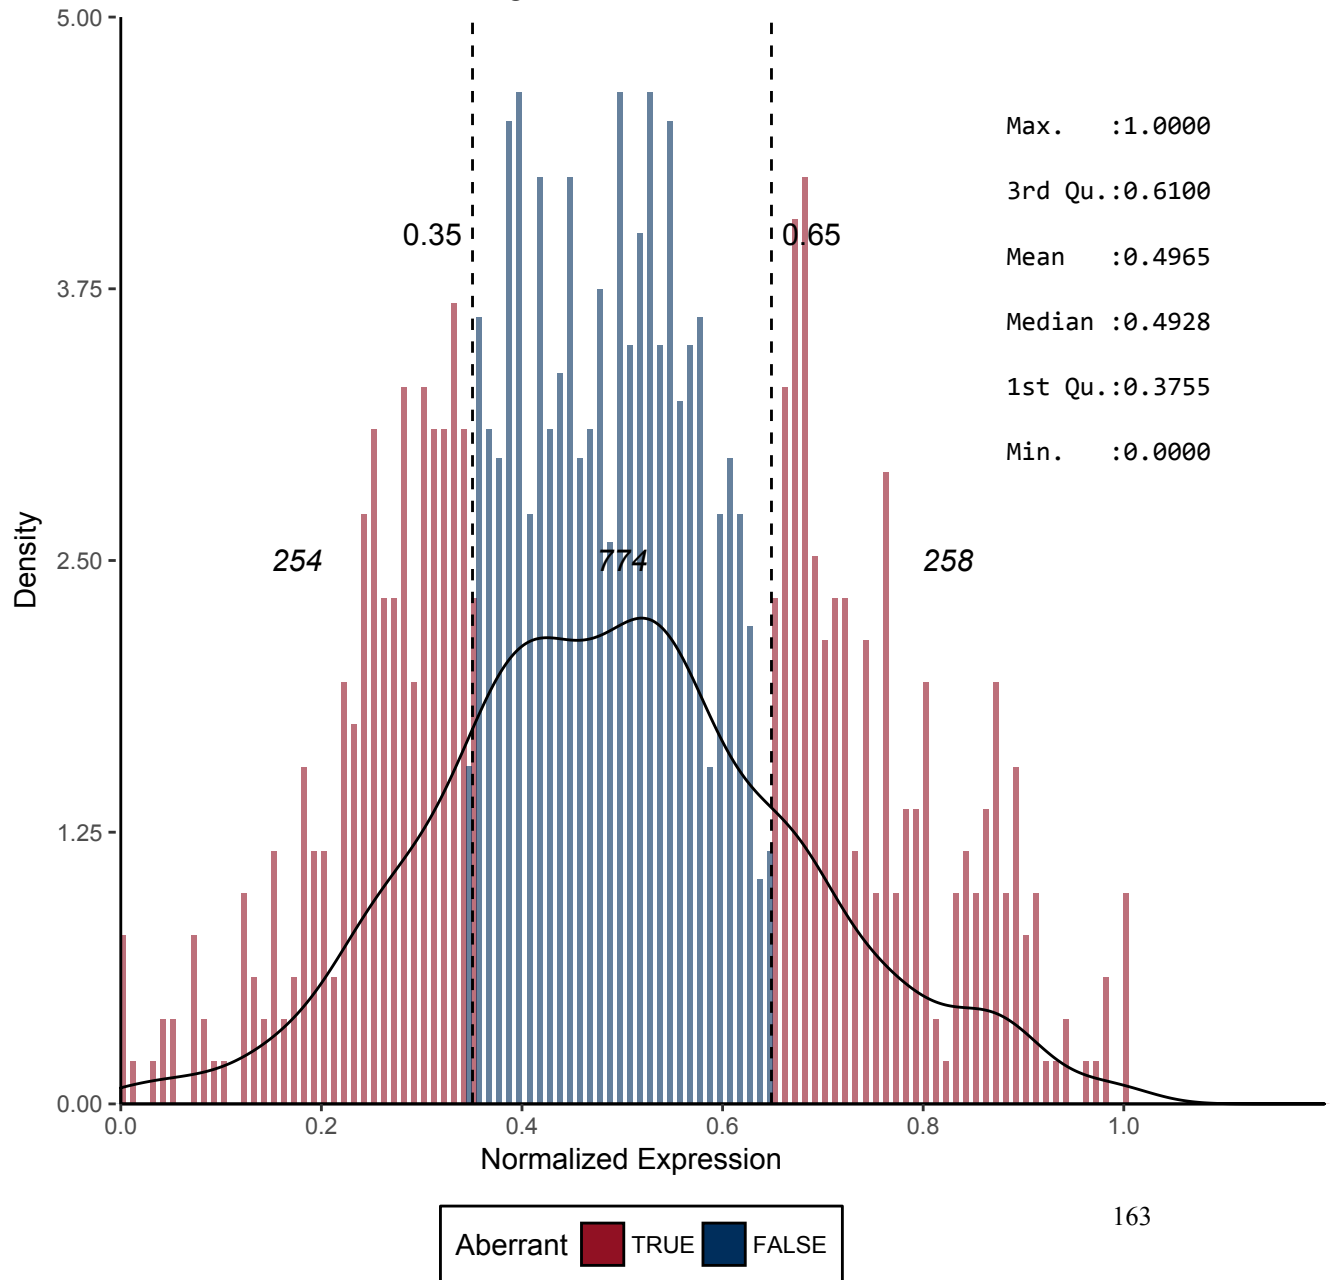

Figure 147 - CD127

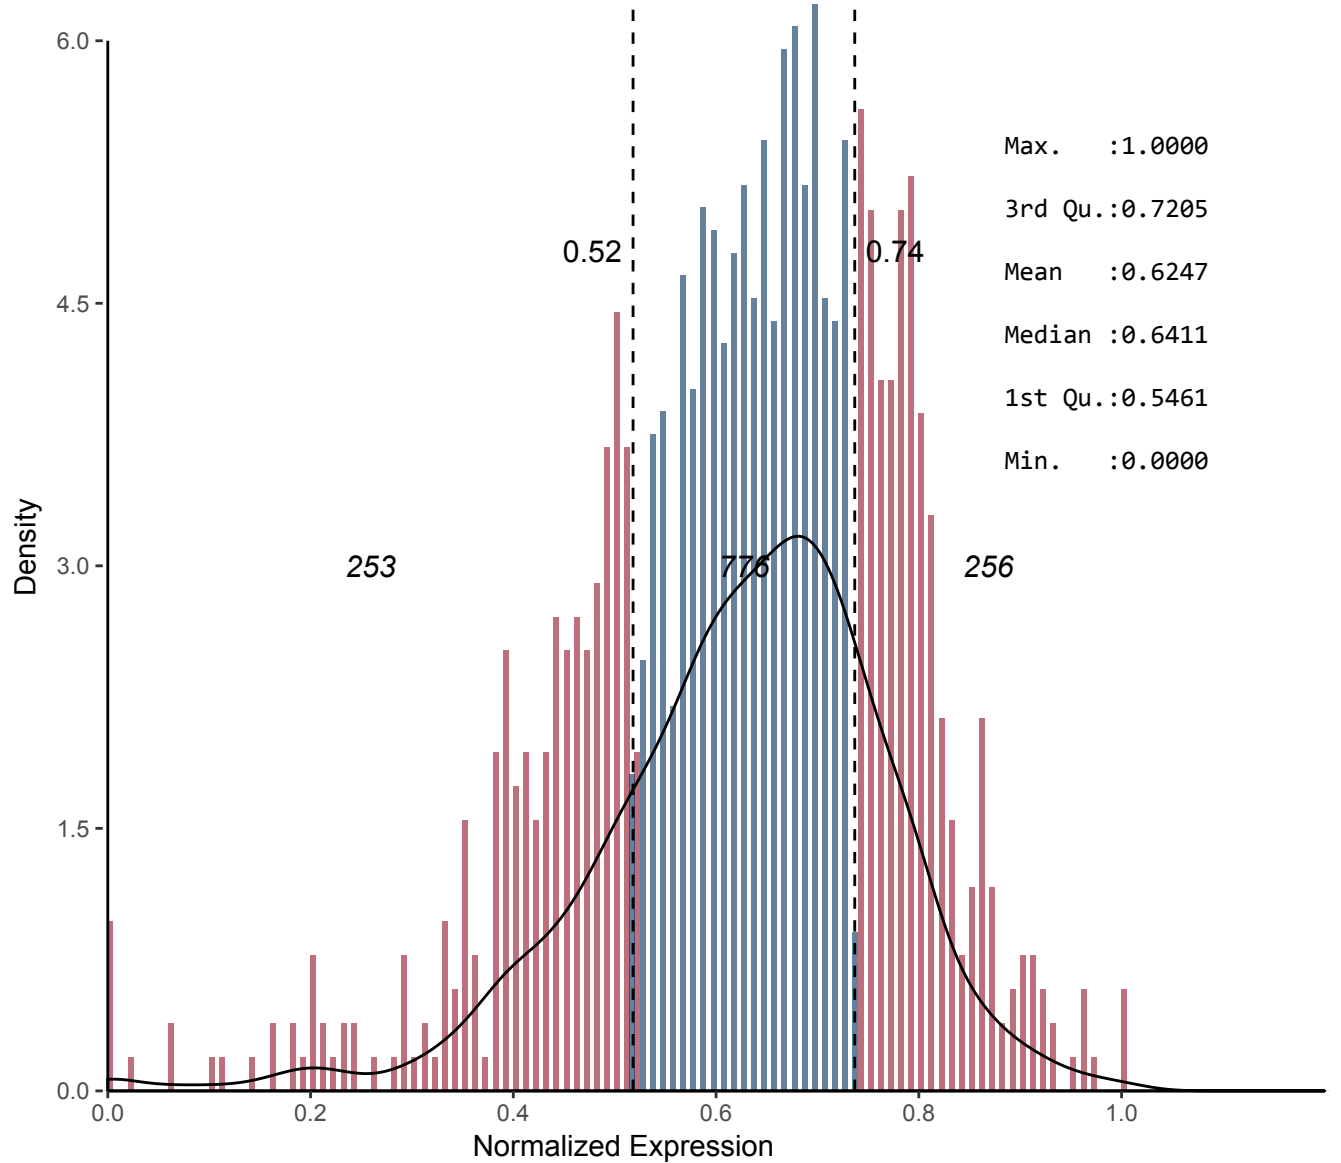

Aberrant ■ TRUE ■ FALSE

Figure 148 - CD130

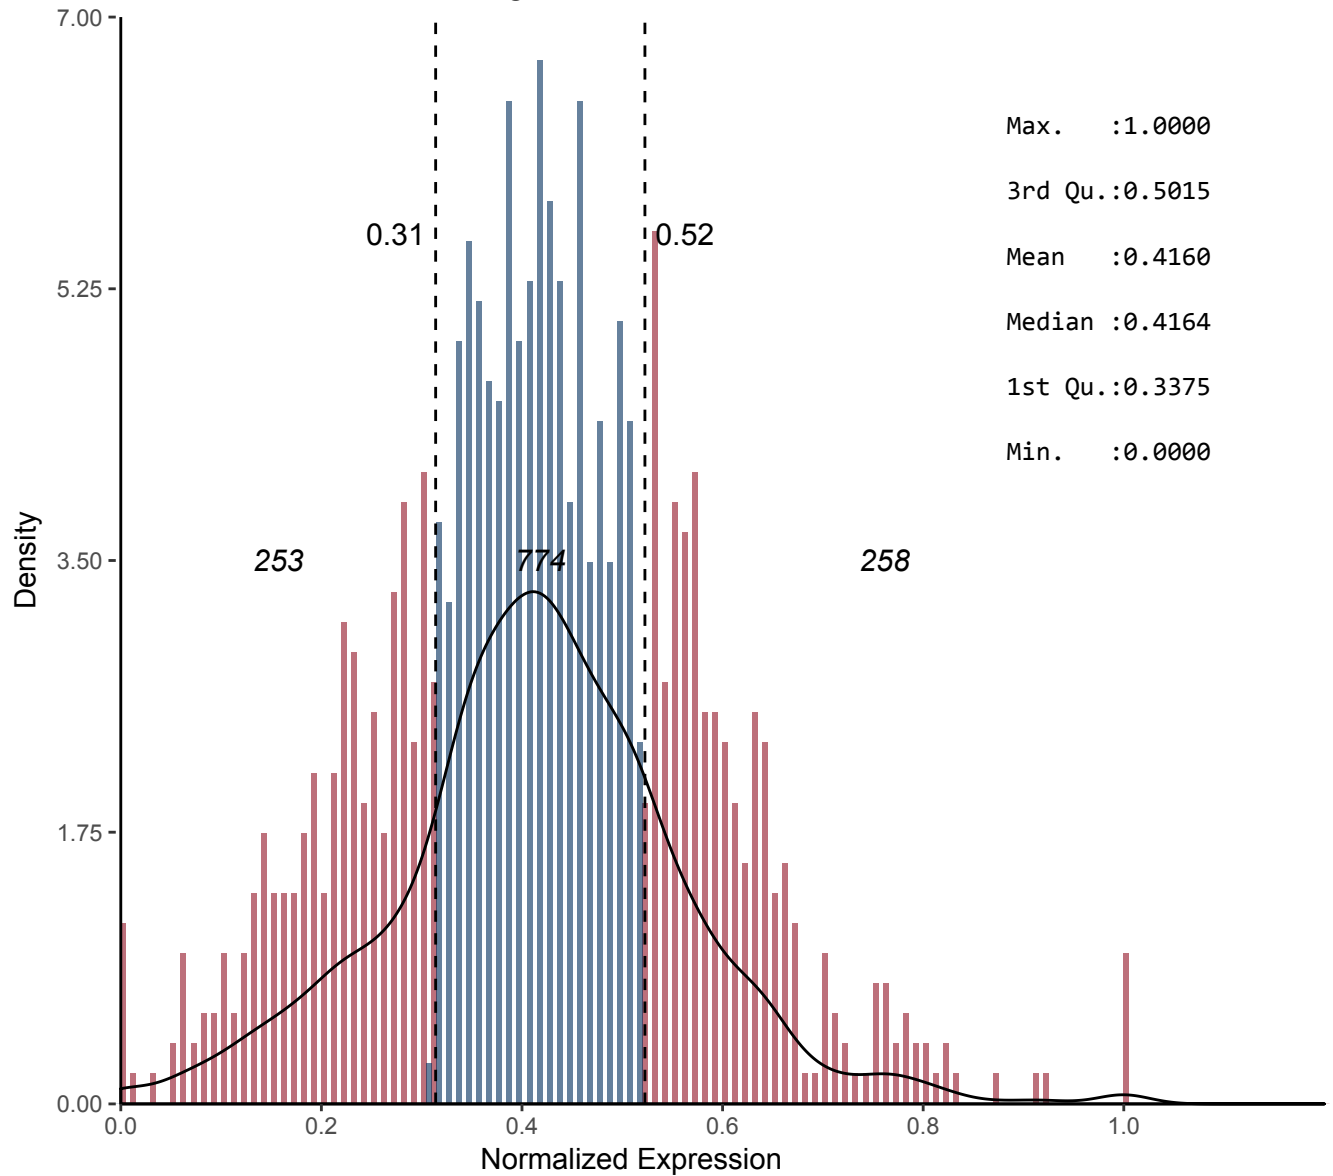

Figure 149 - CD131

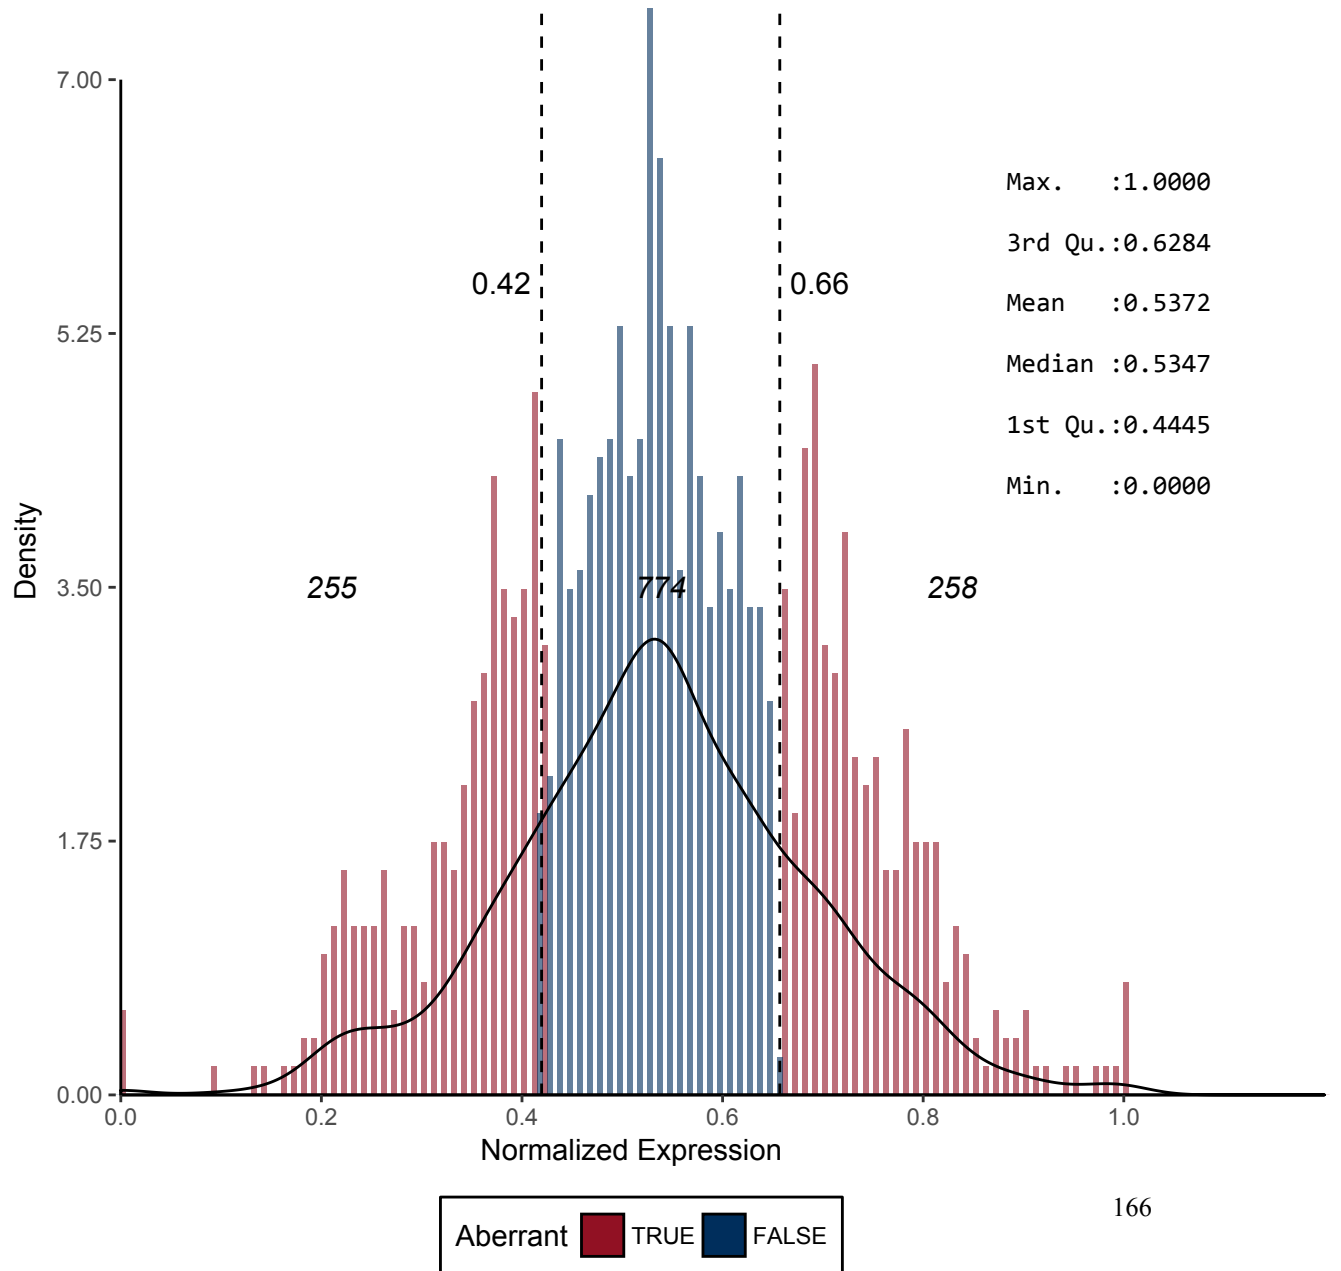

Figure 150 - CD132

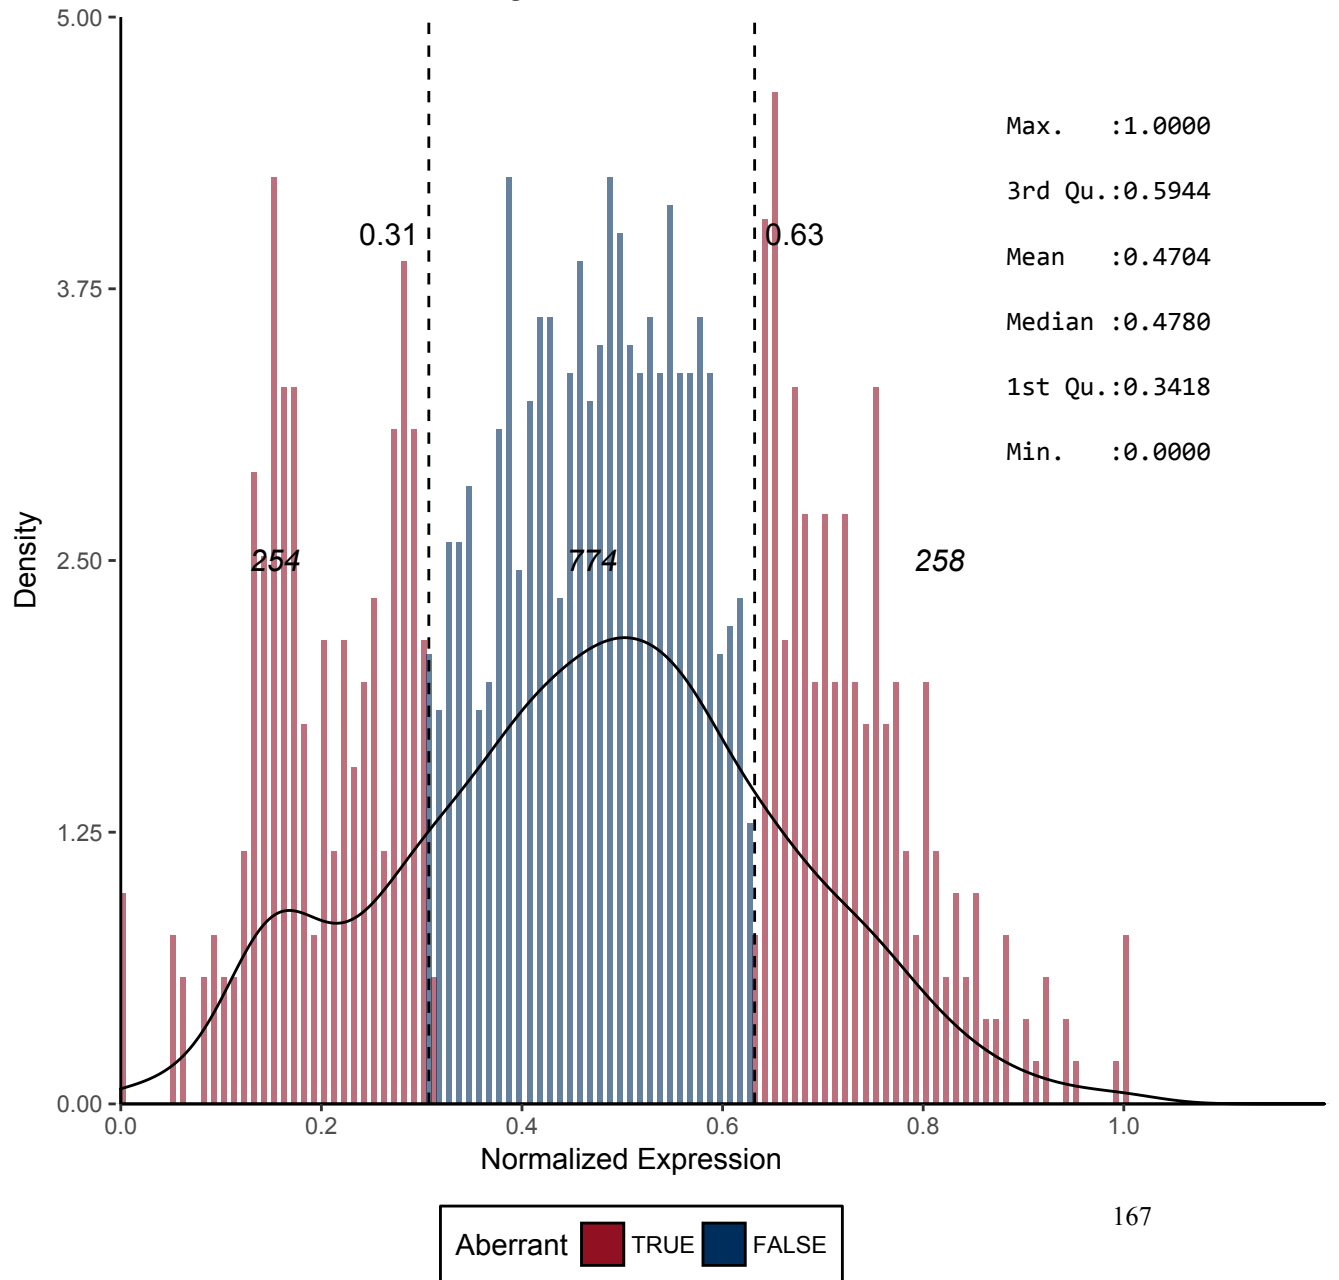

Figure 151 - CD133\*

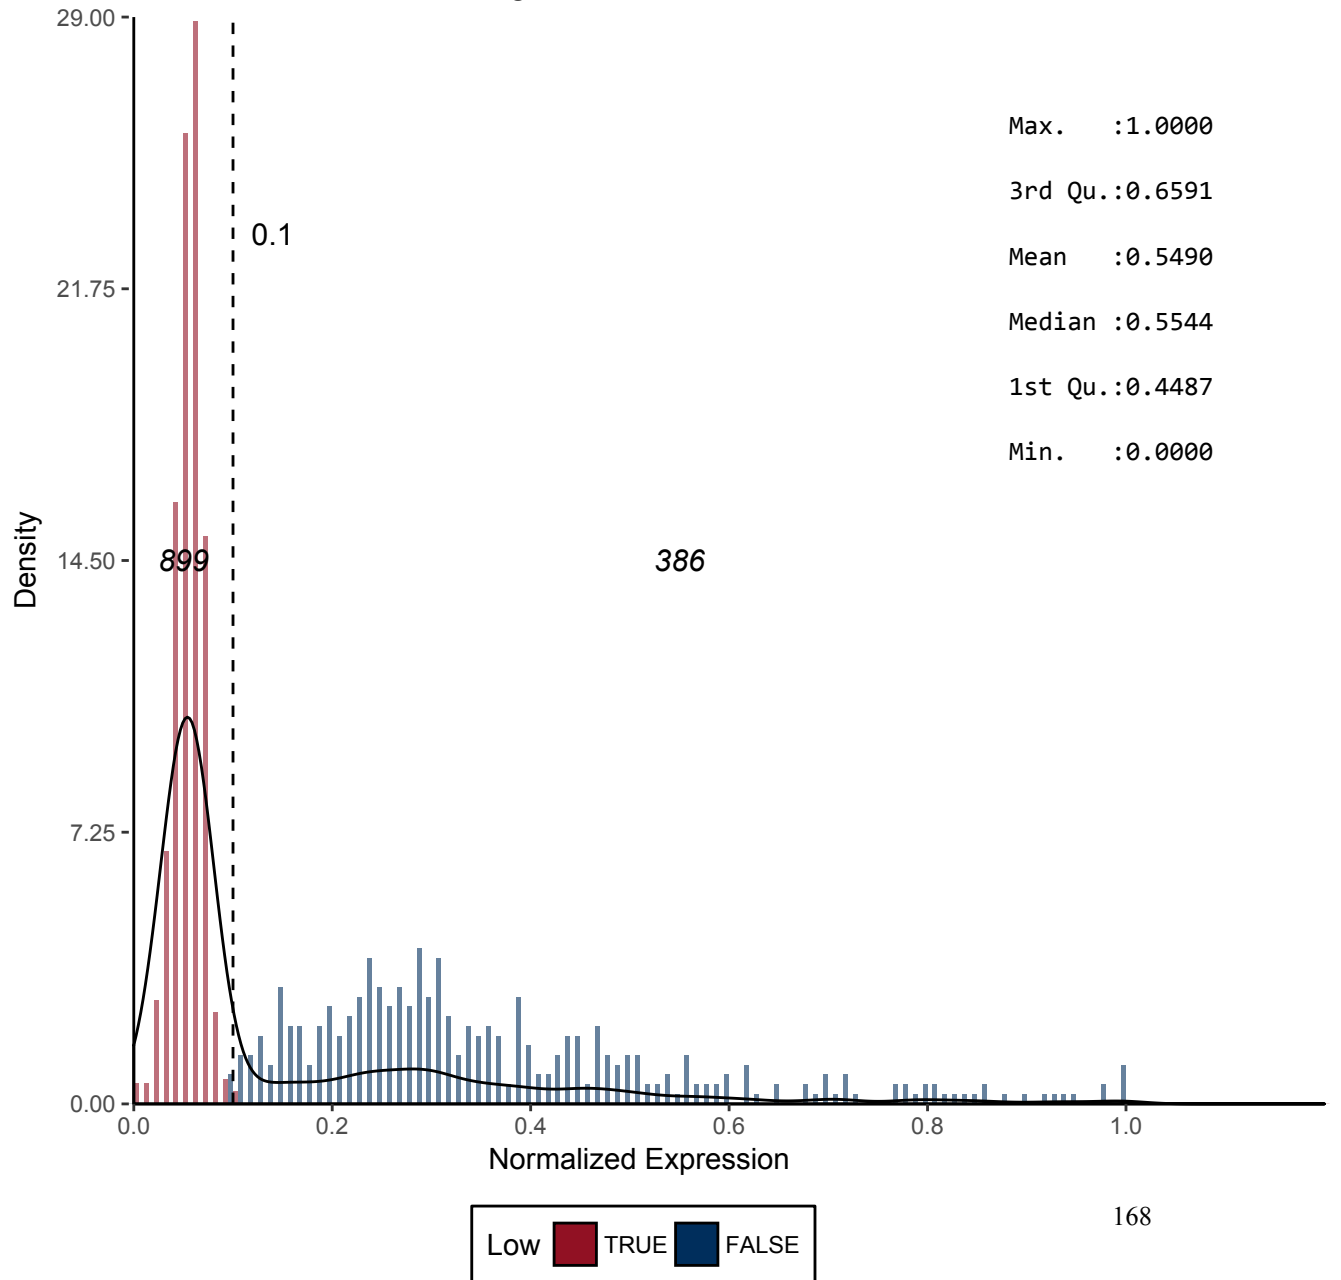



Figure 152 - CD134

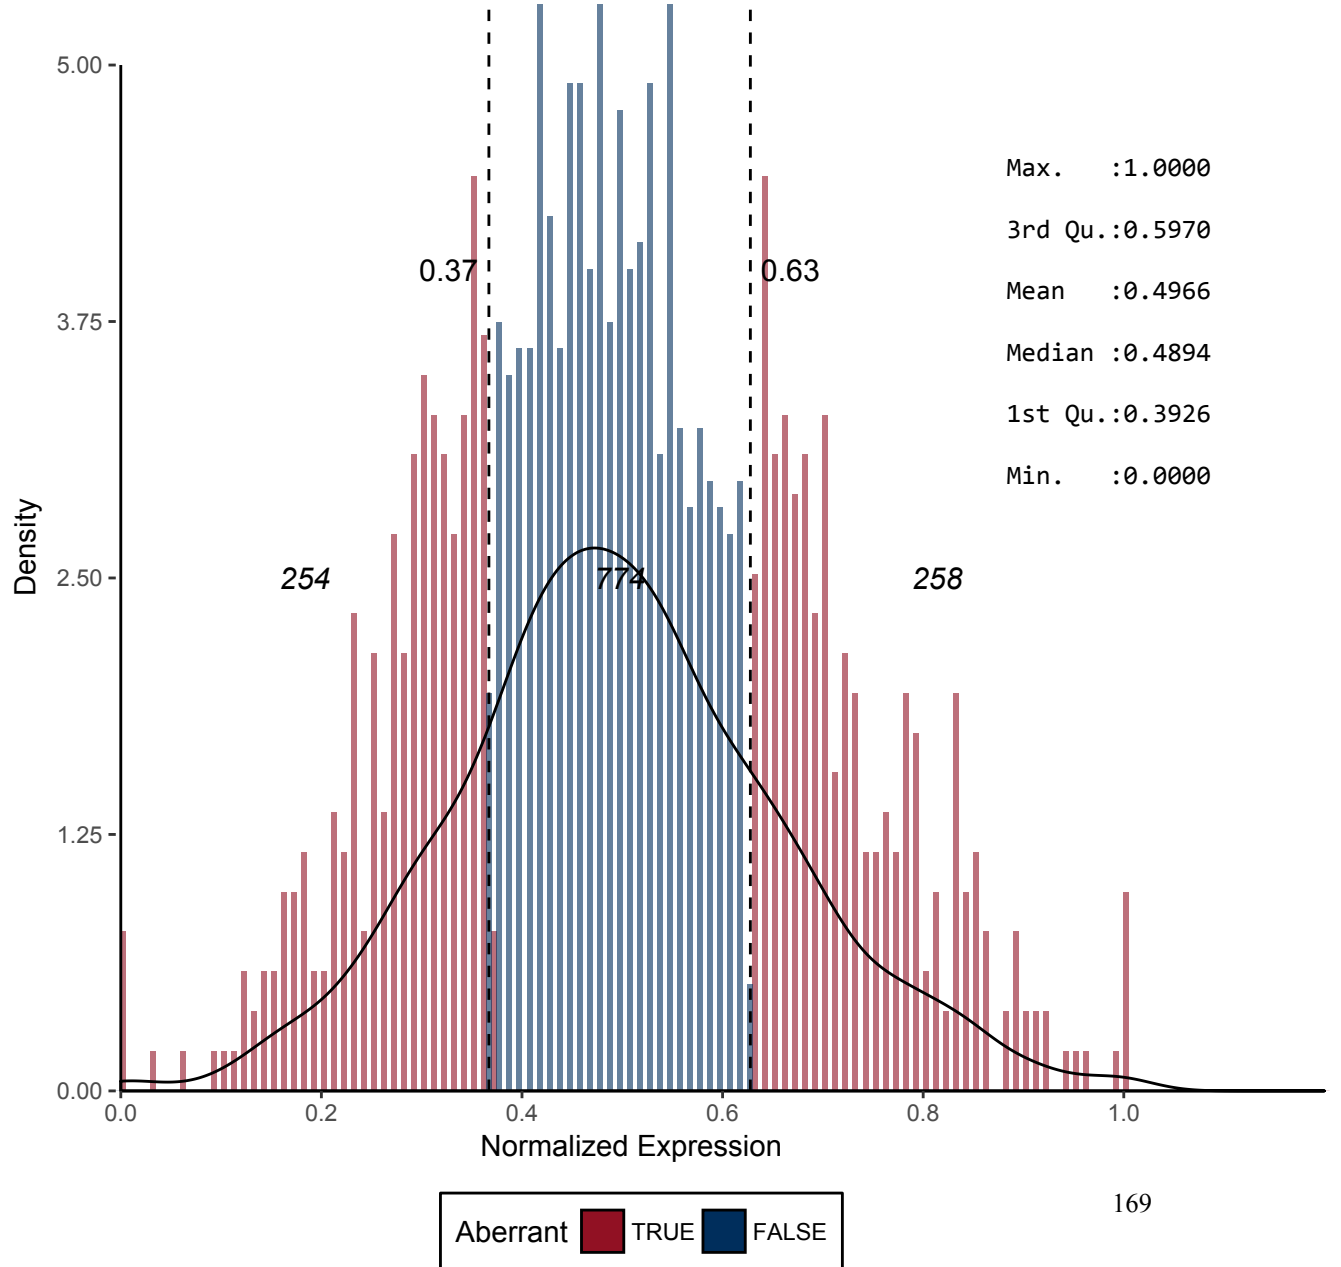

Figure 153 - CD135\*

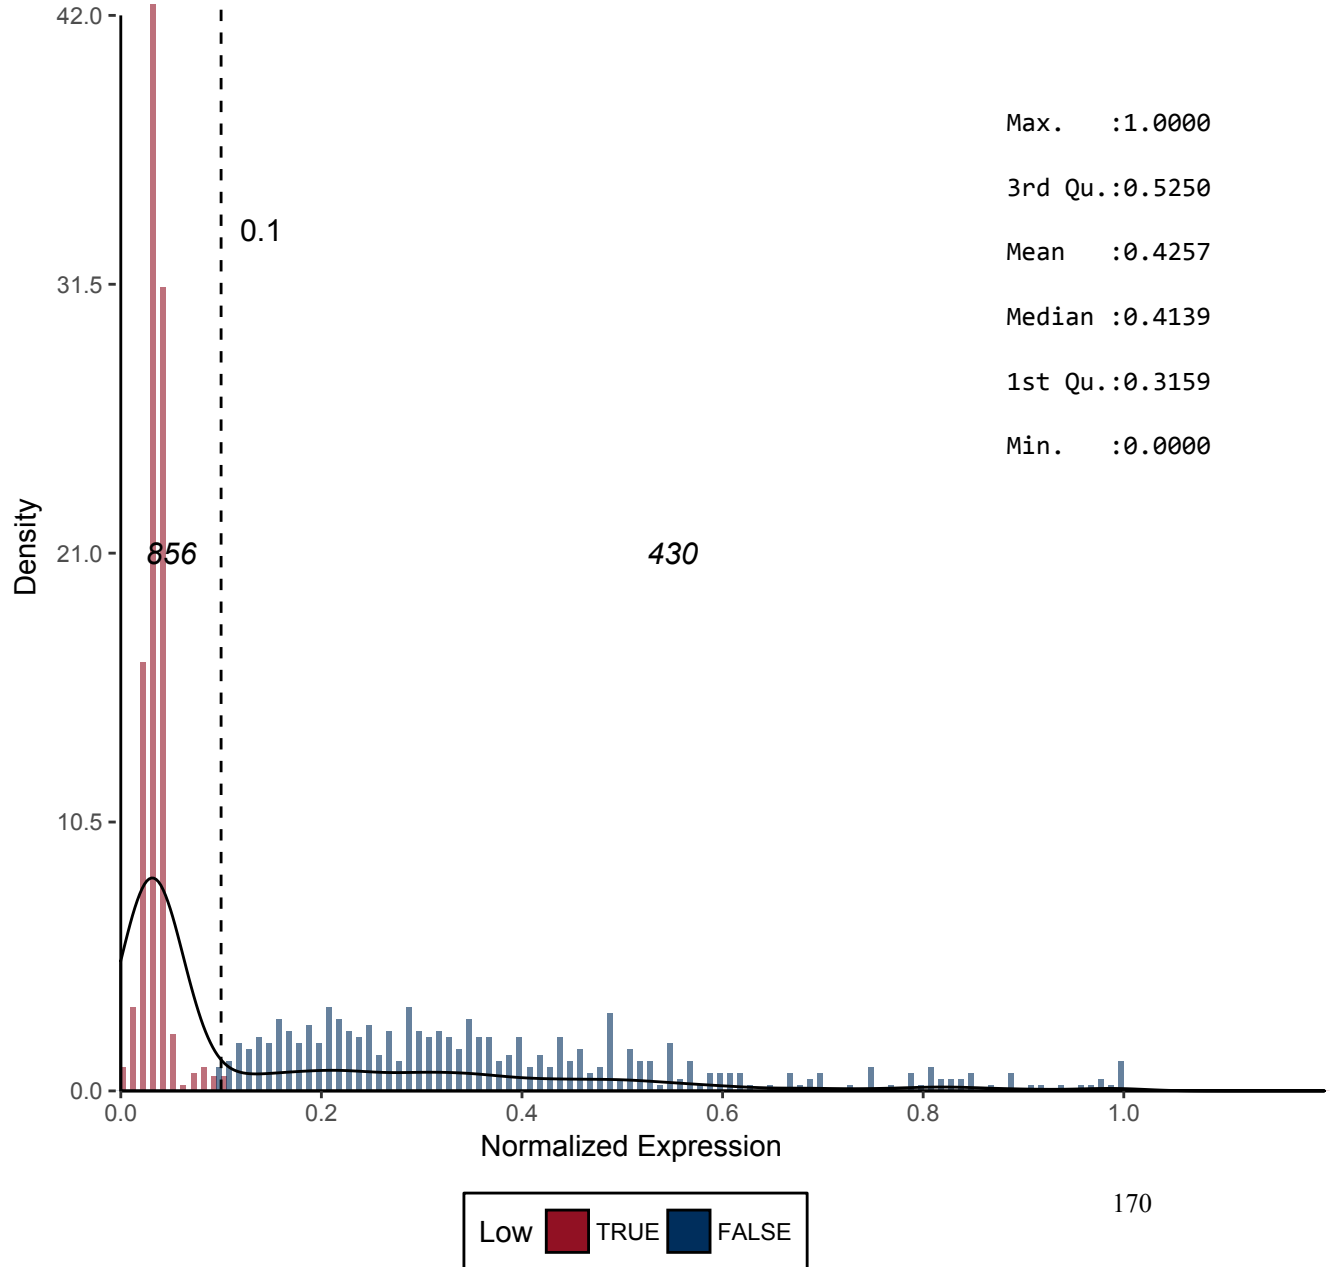

Figure 154 - CD136\*

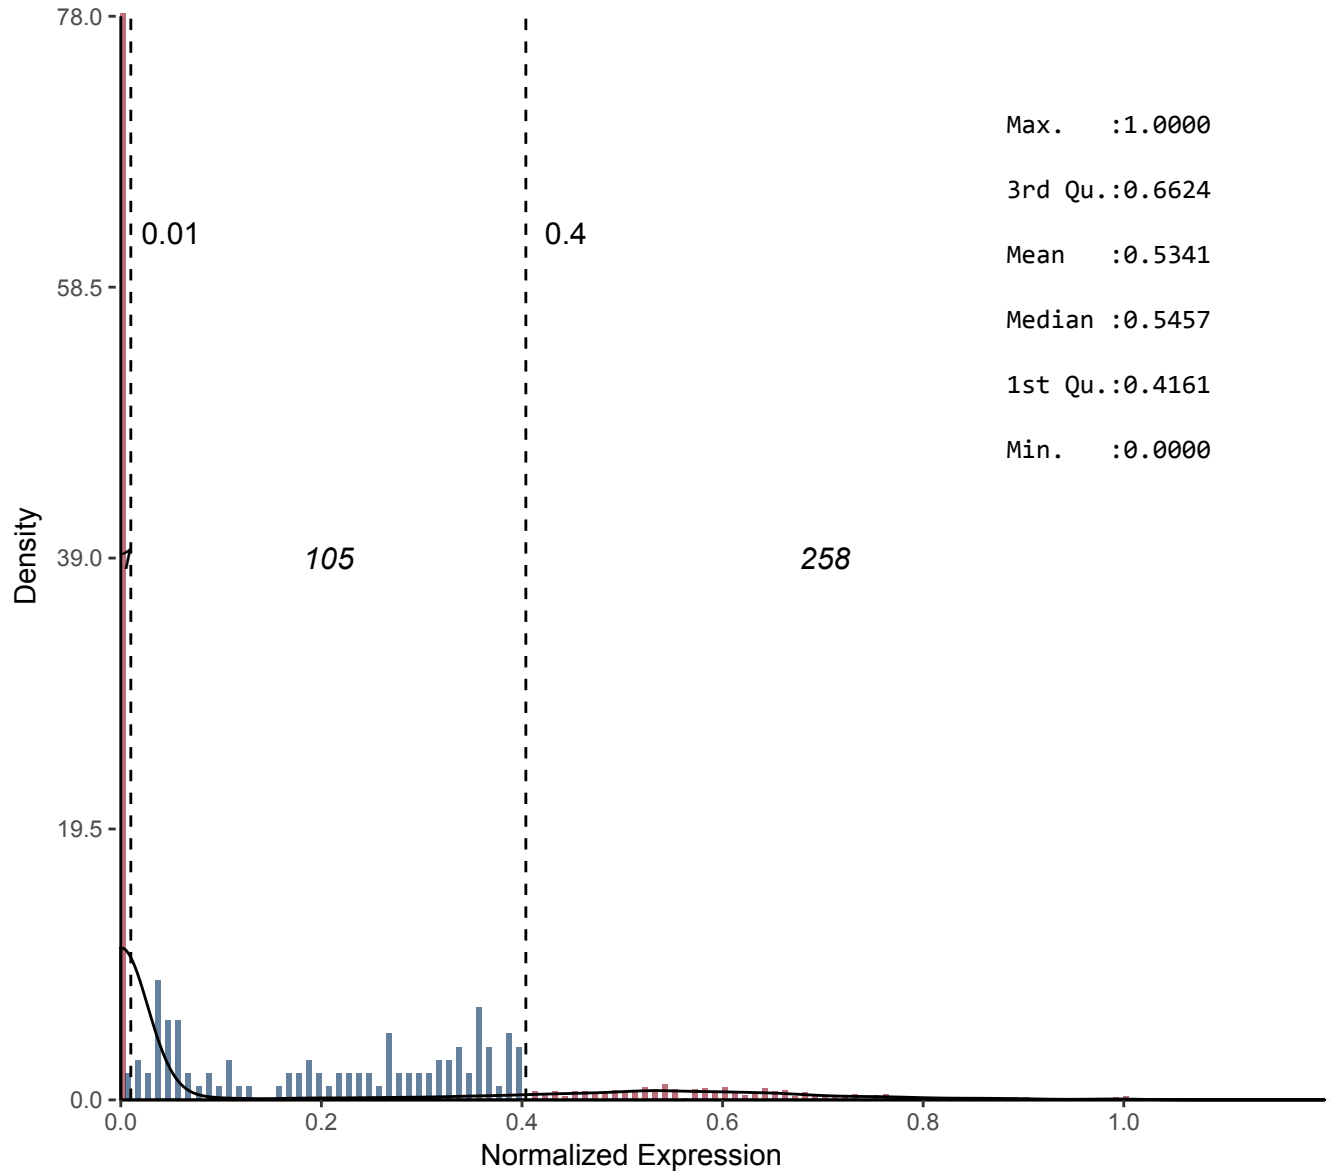

Aberrant TRUE FALSE

Figure 155 - CD137

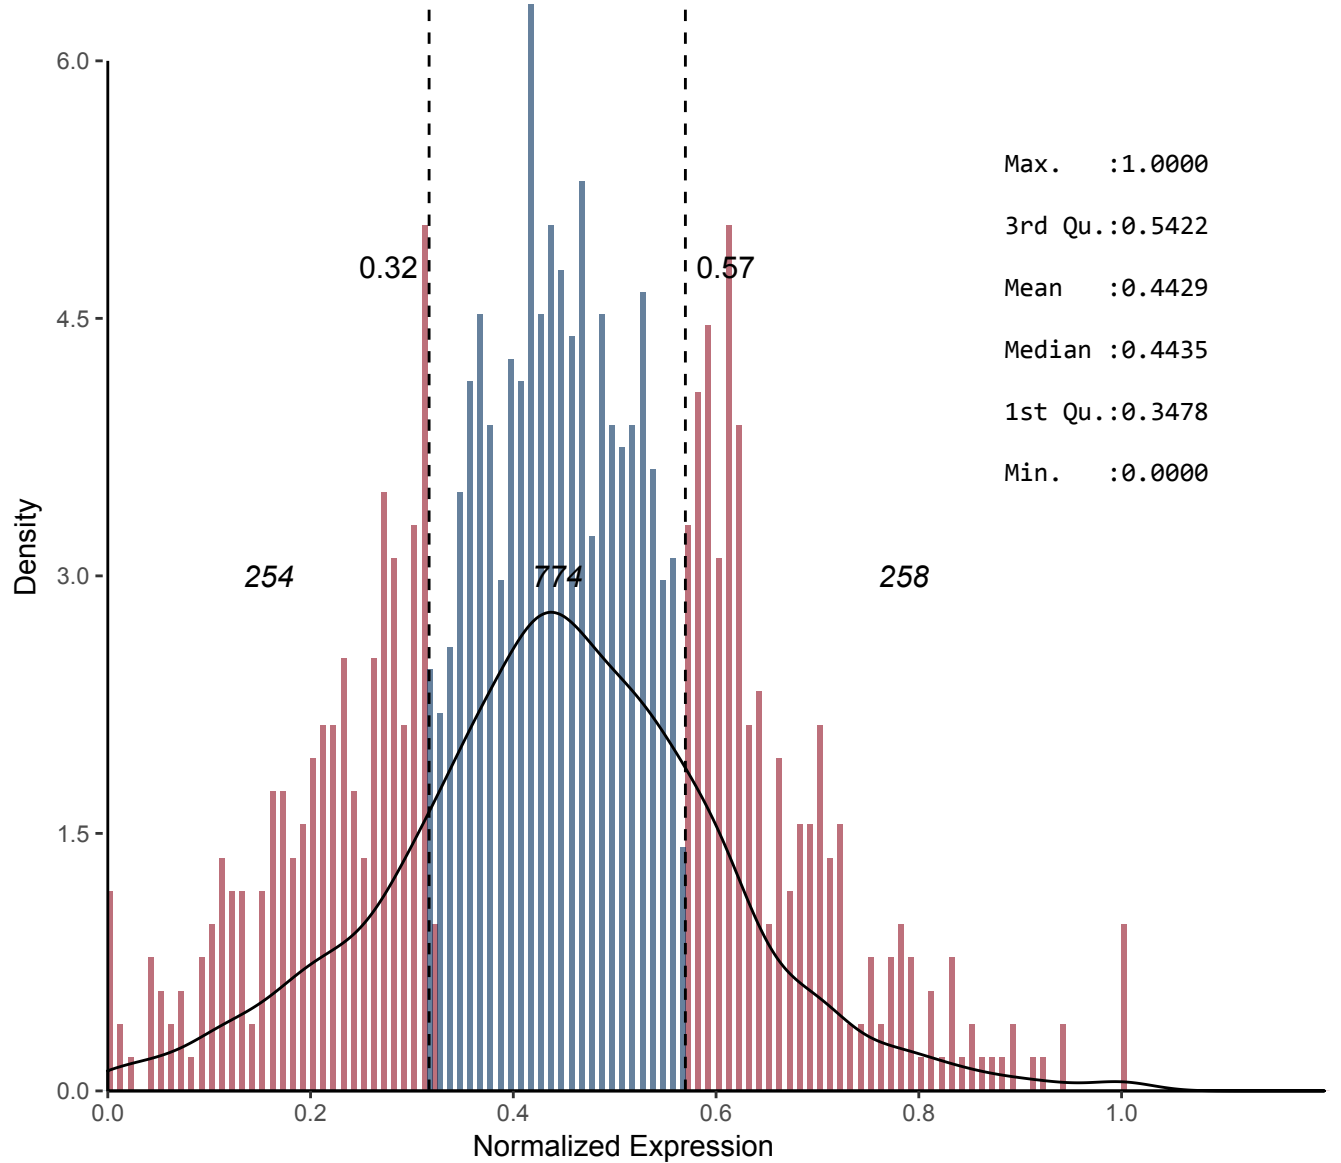

Aberrant TRUE FALSE

Figure 156 - CD138

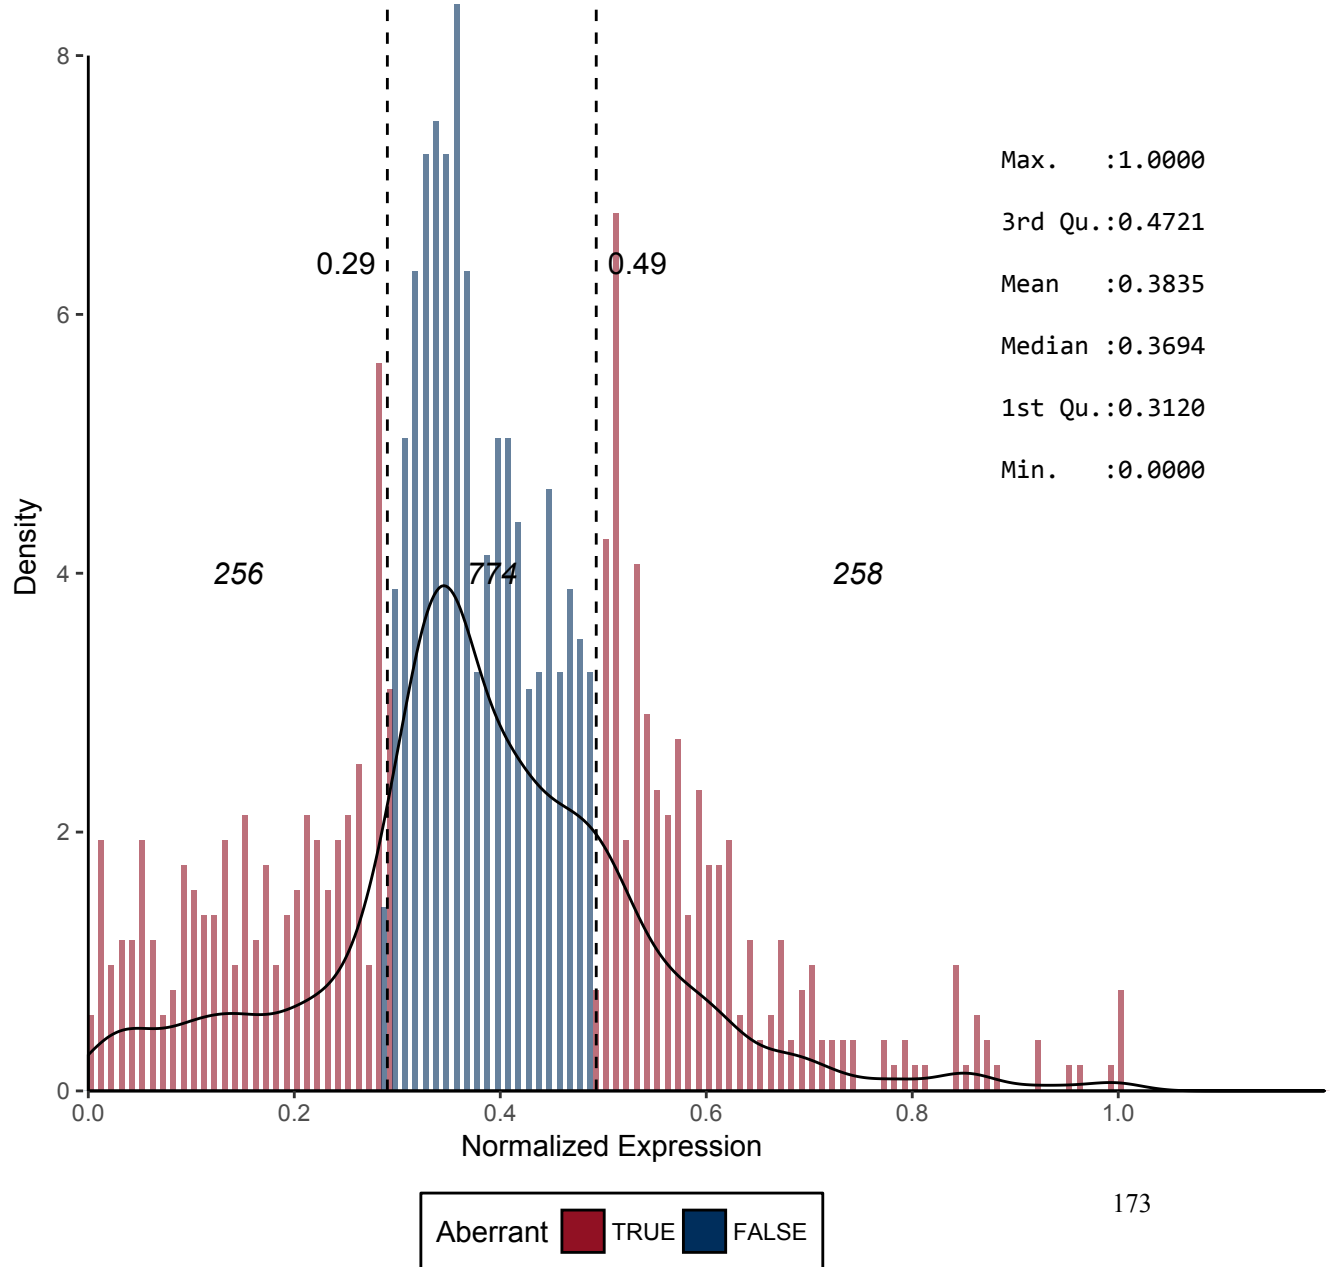

Figure 157 - CD140A\*

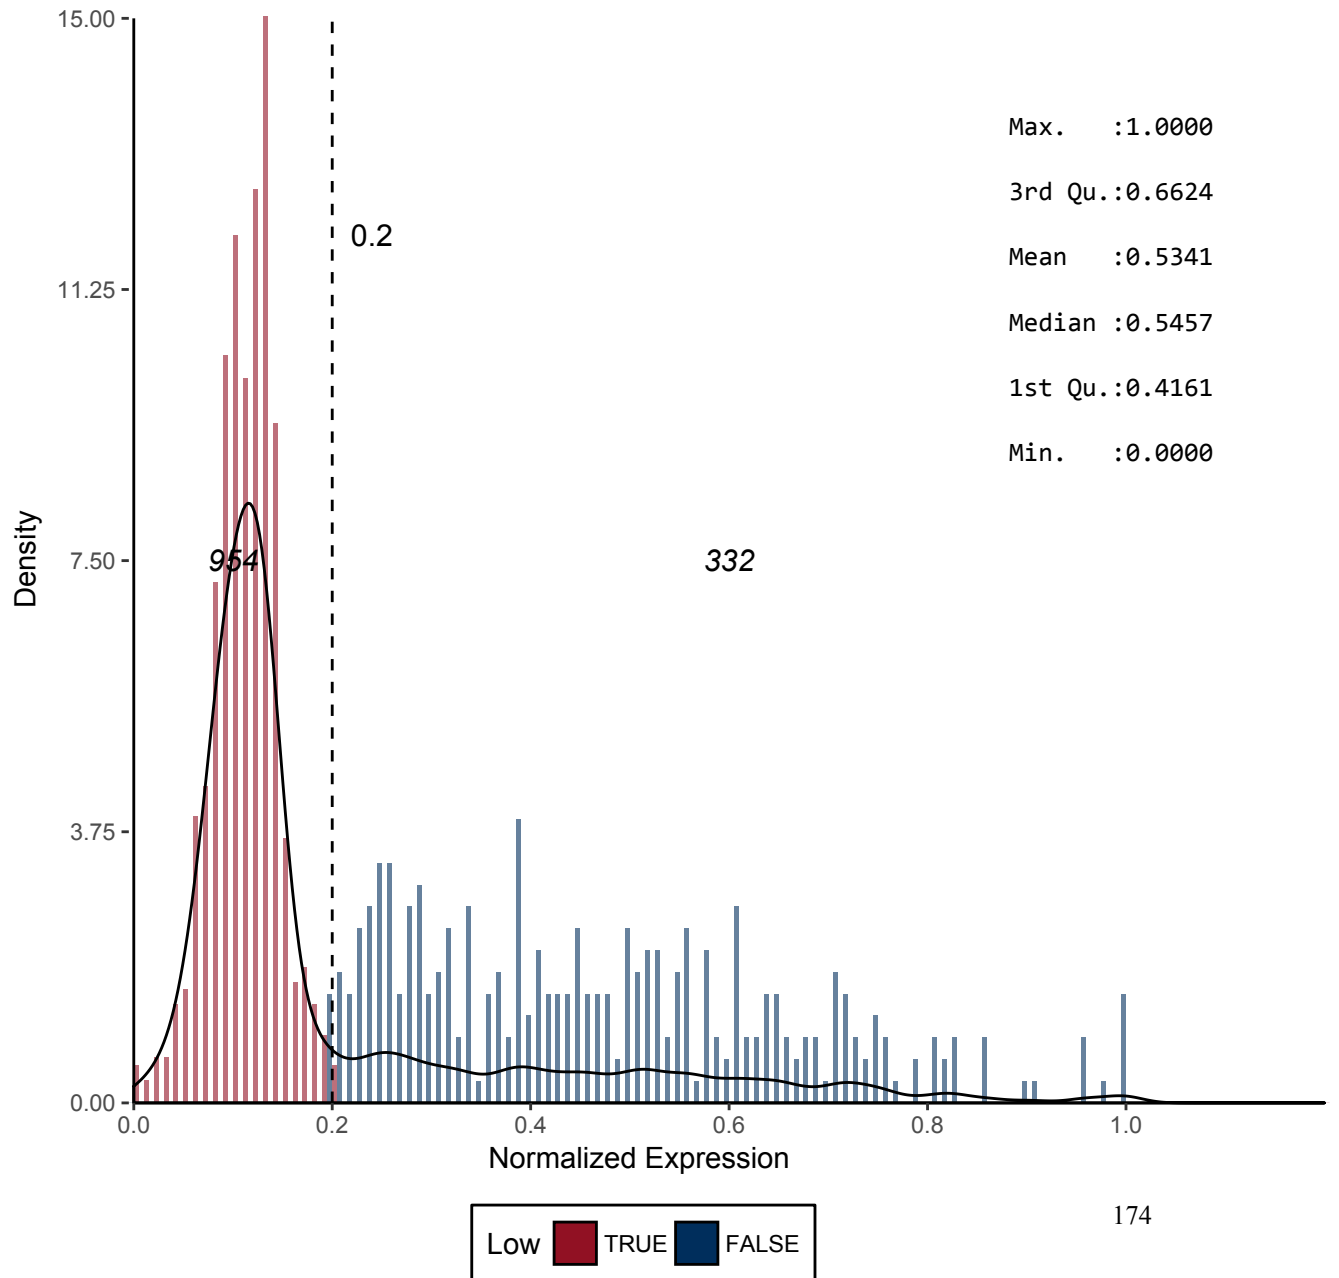

Figure 158 - CD140B

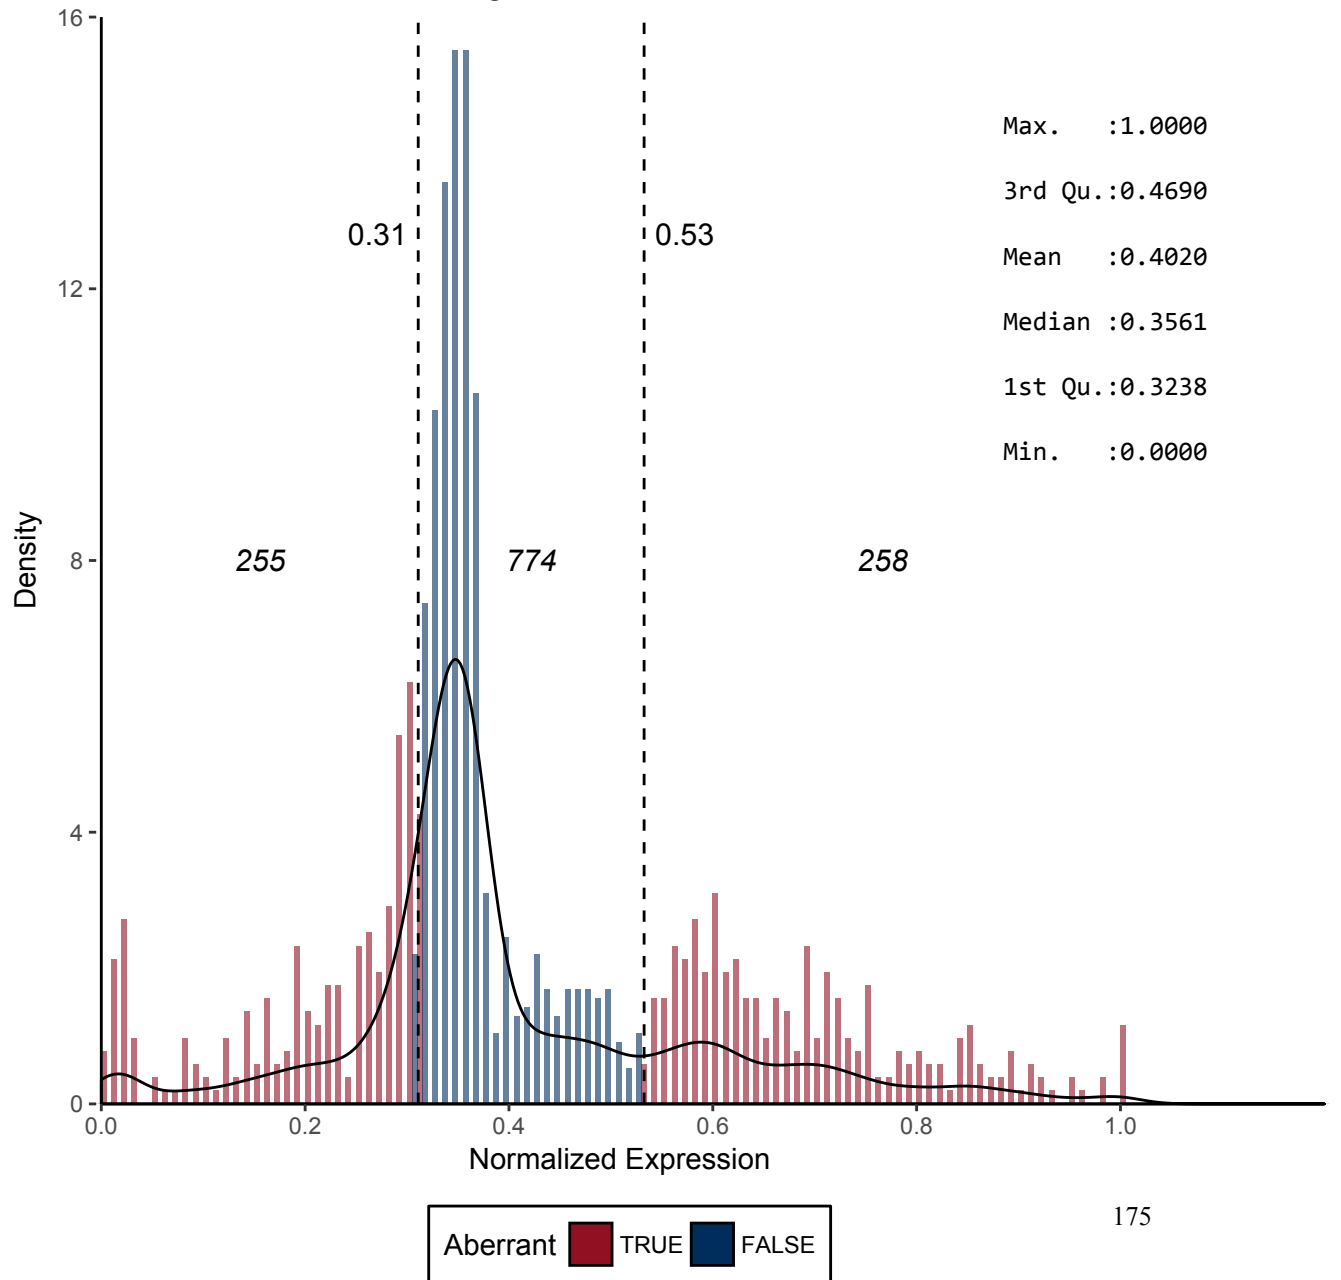

Figure 159 - CD141

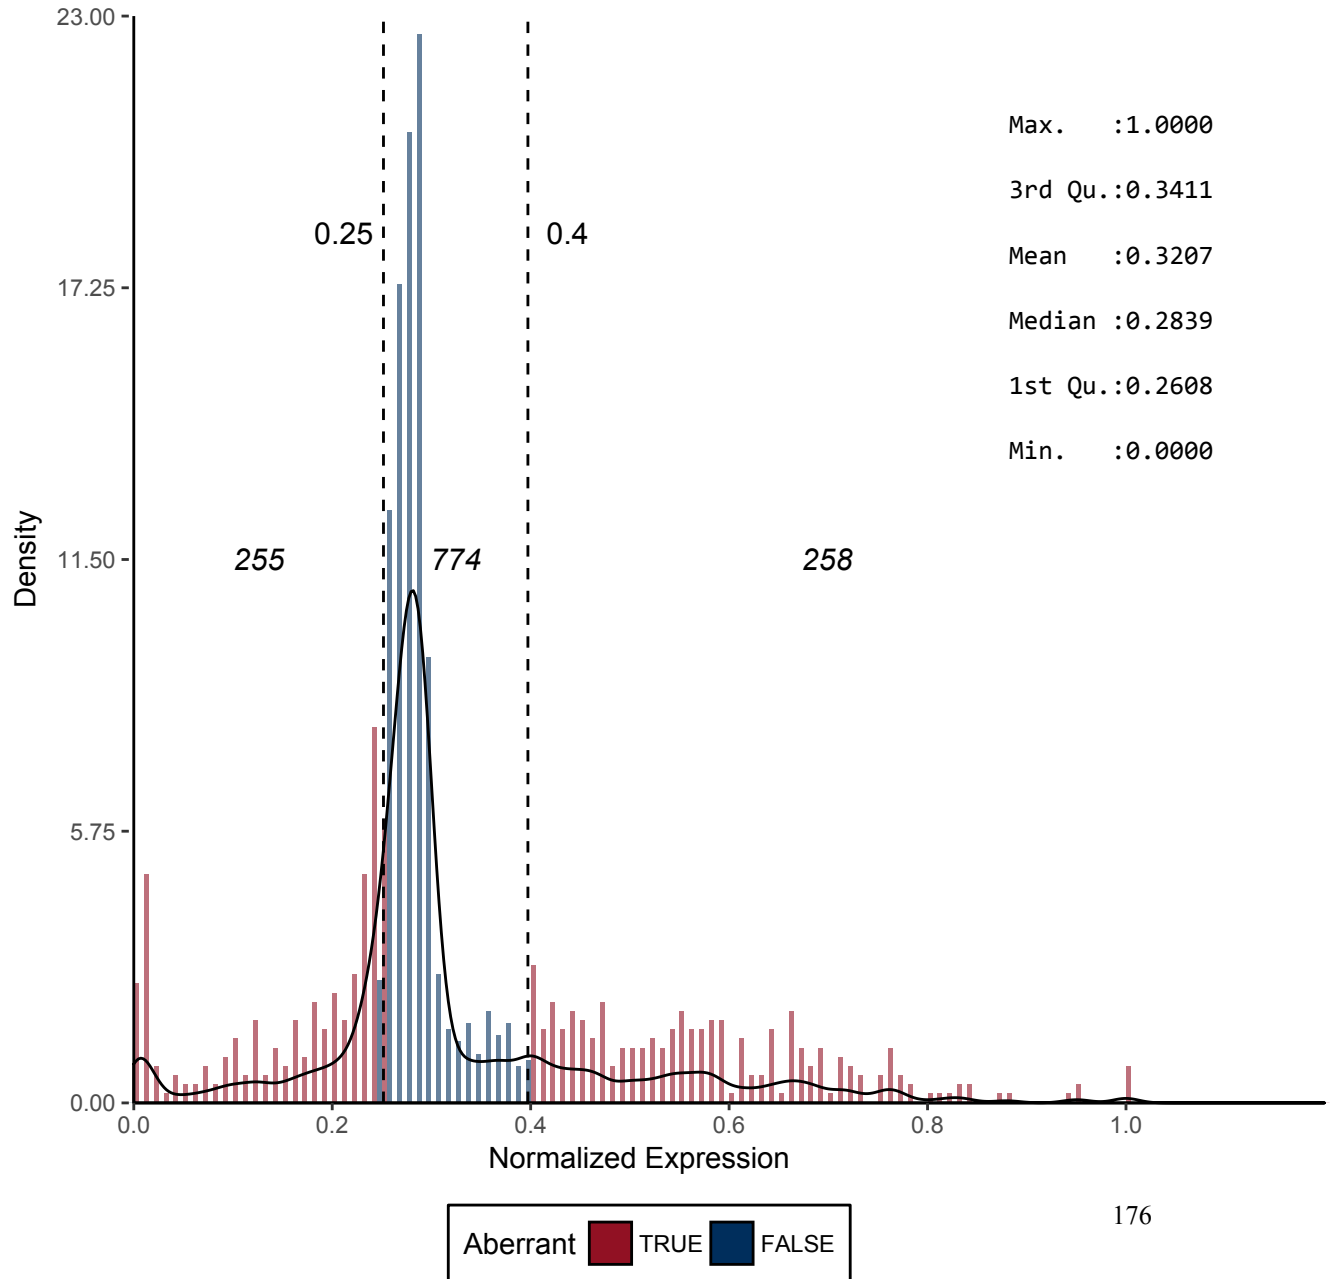



Figure 160 - CD142\*

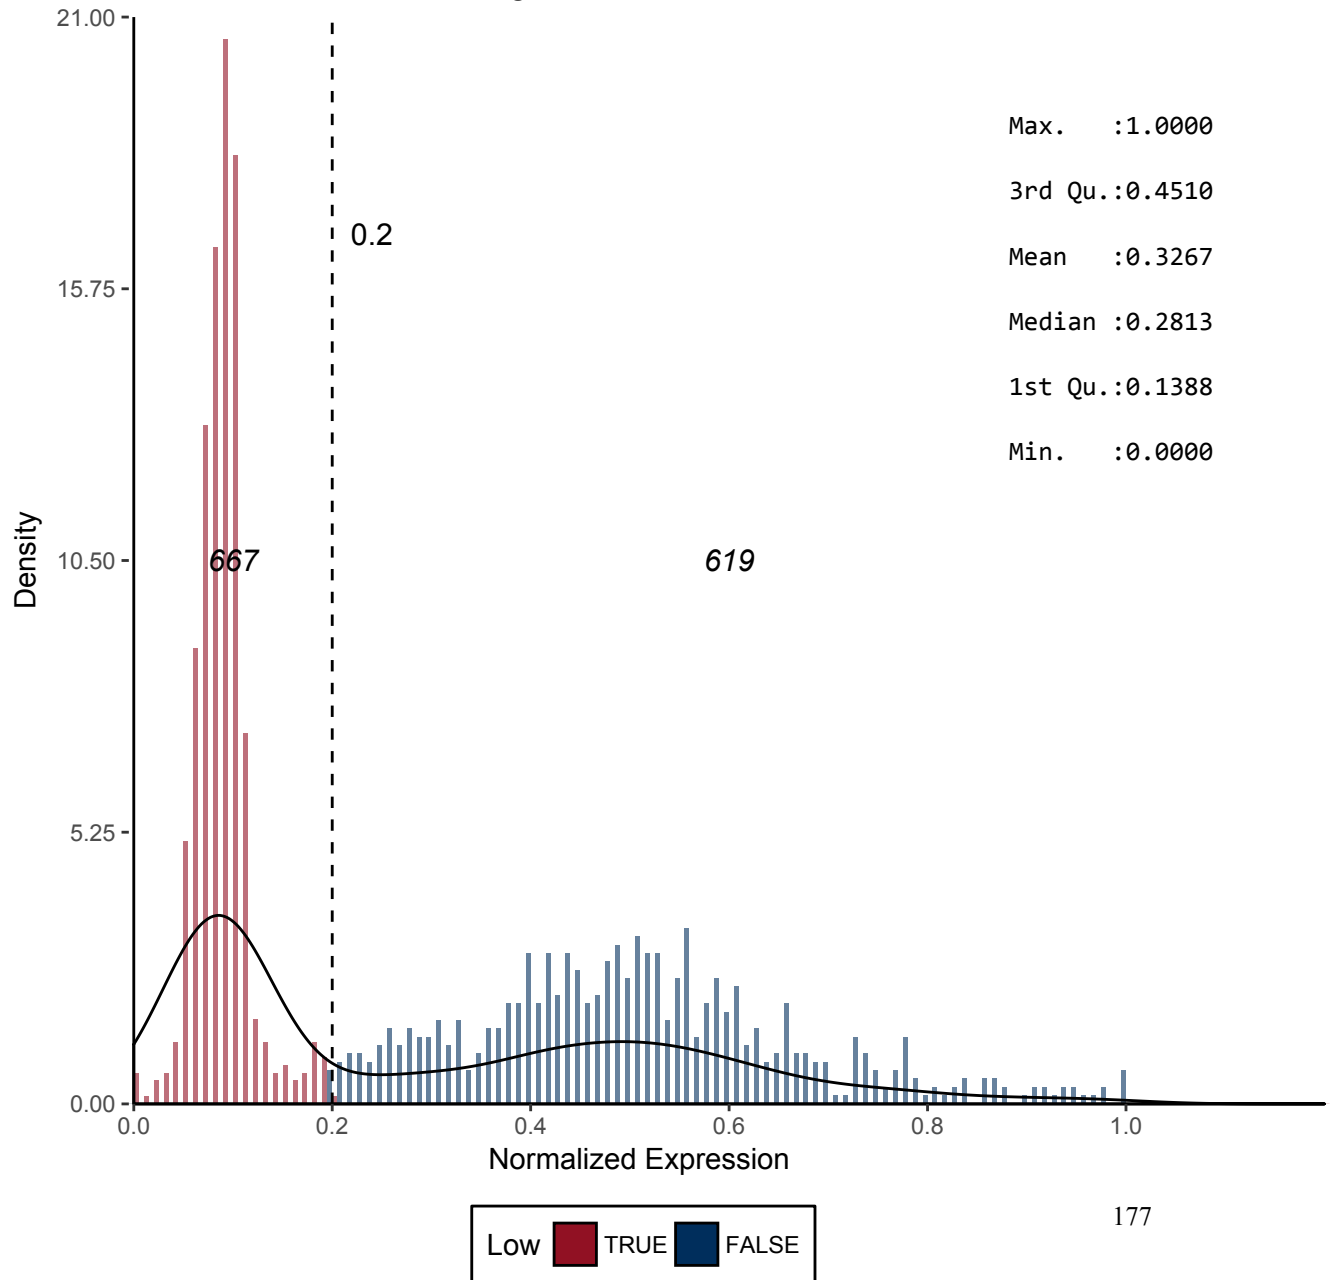

Figure 161 - CD143\*

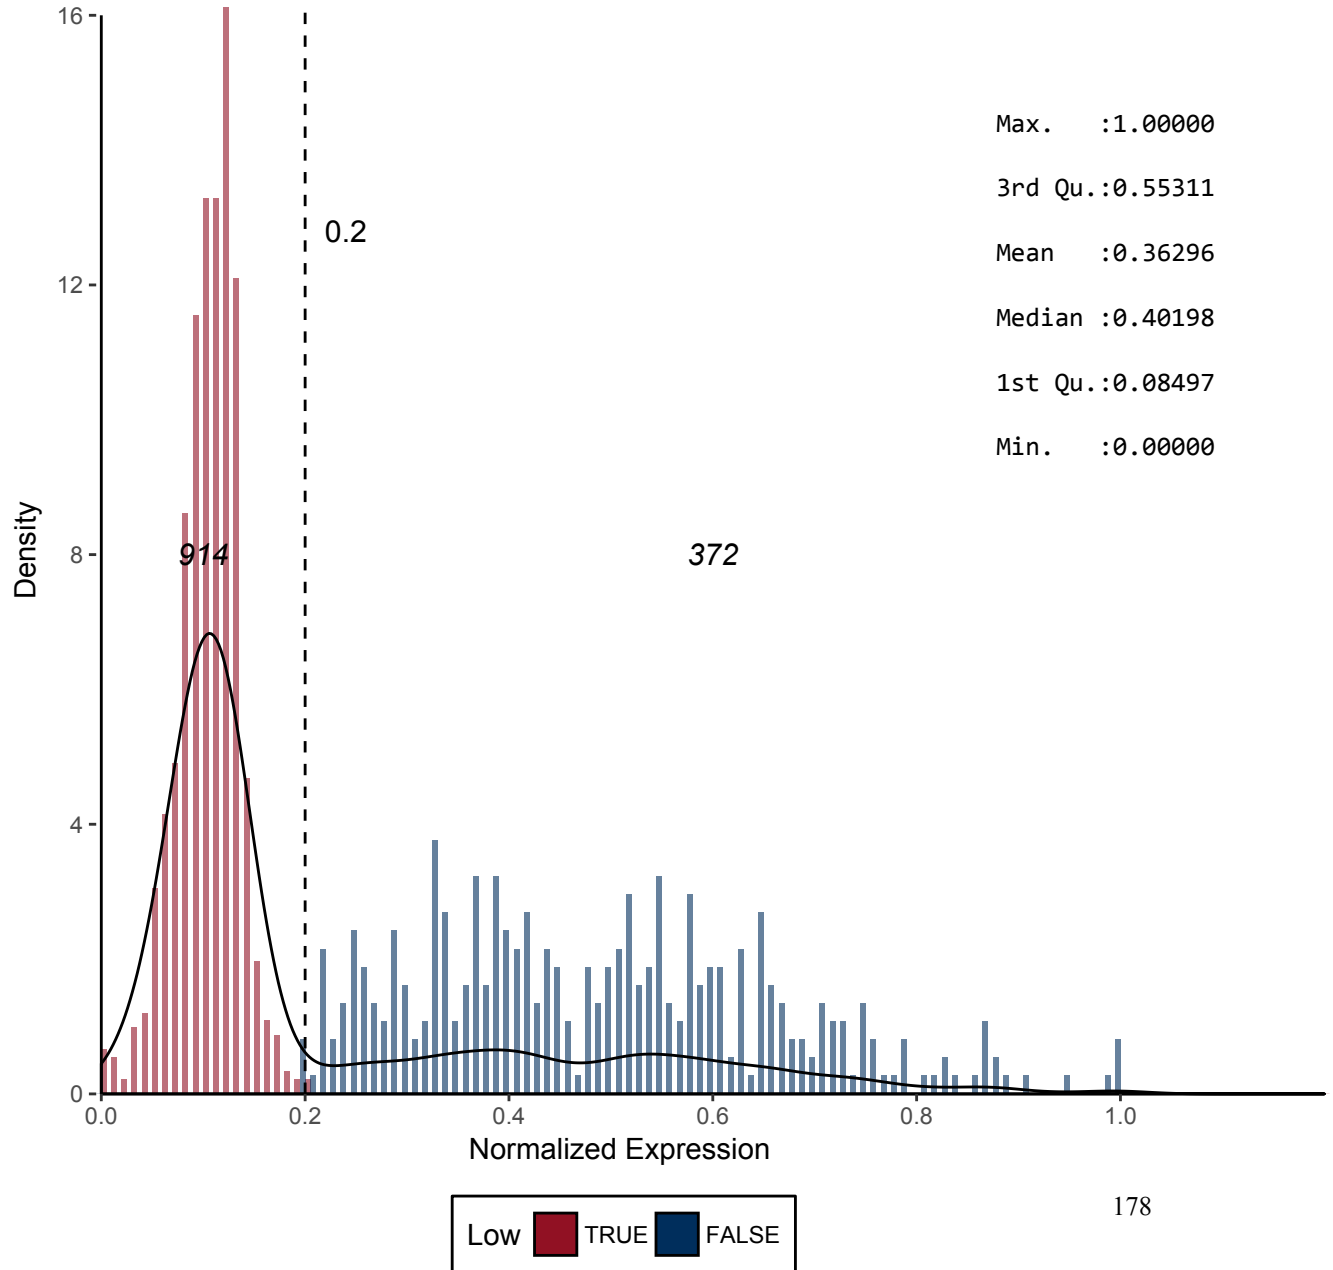

Figure 162 - CD144\*

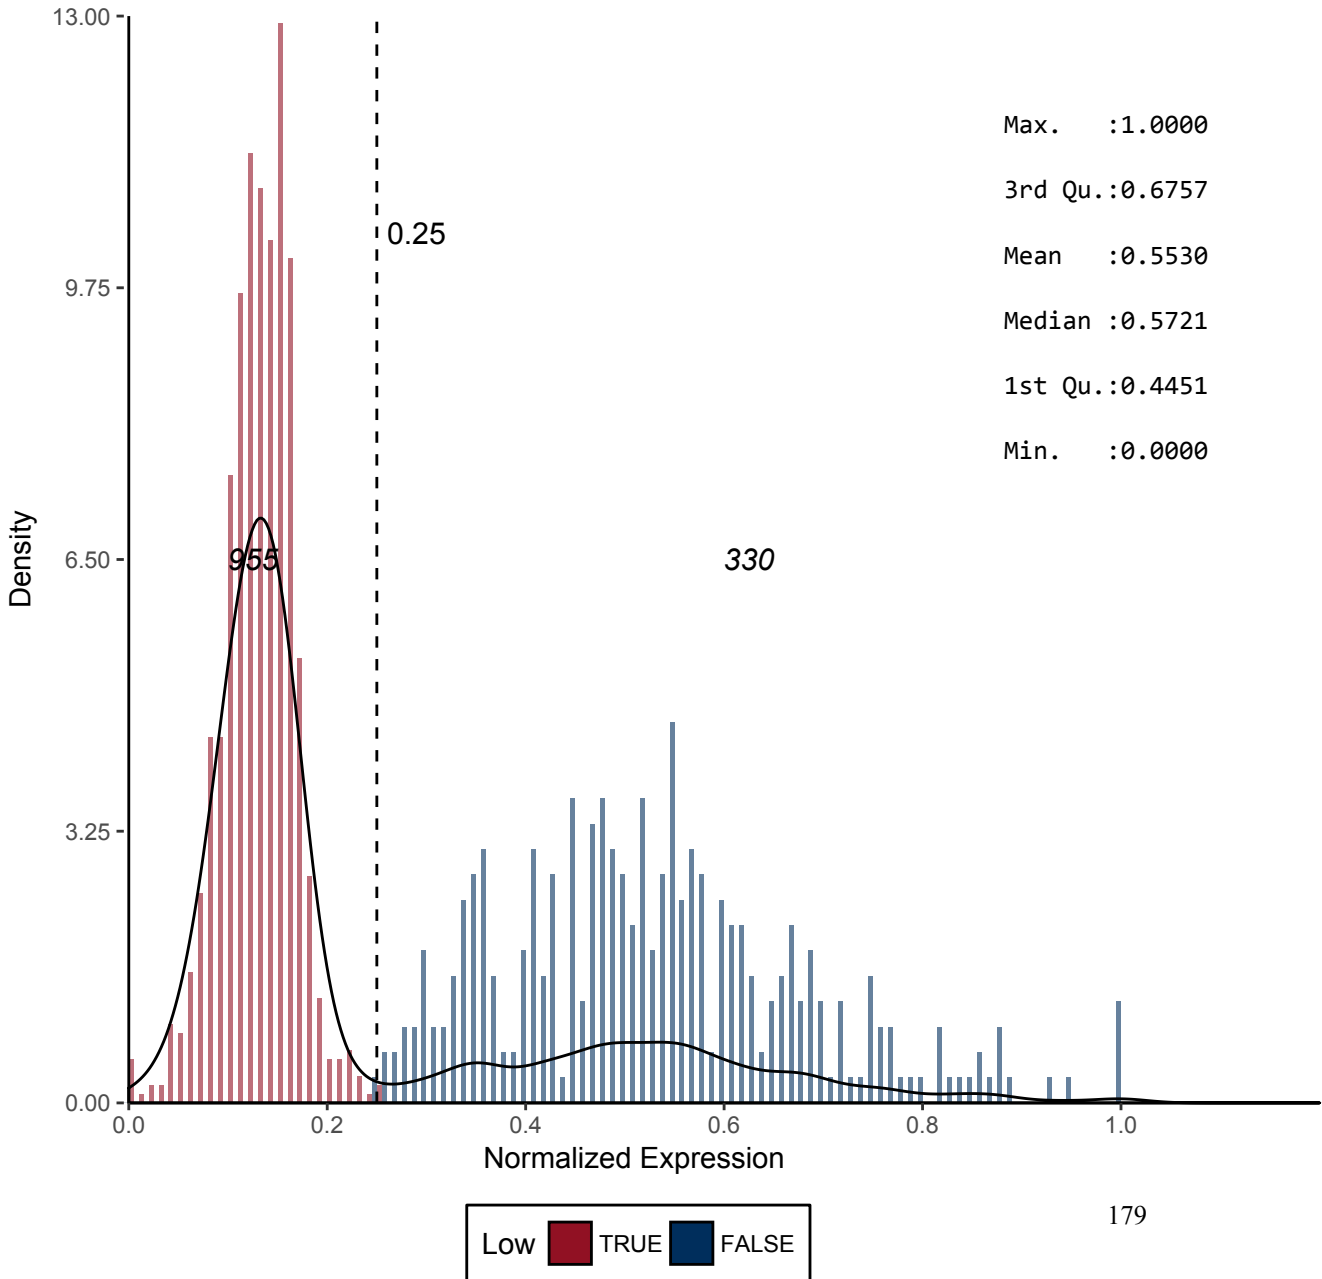

Figure 163 - CD146\*

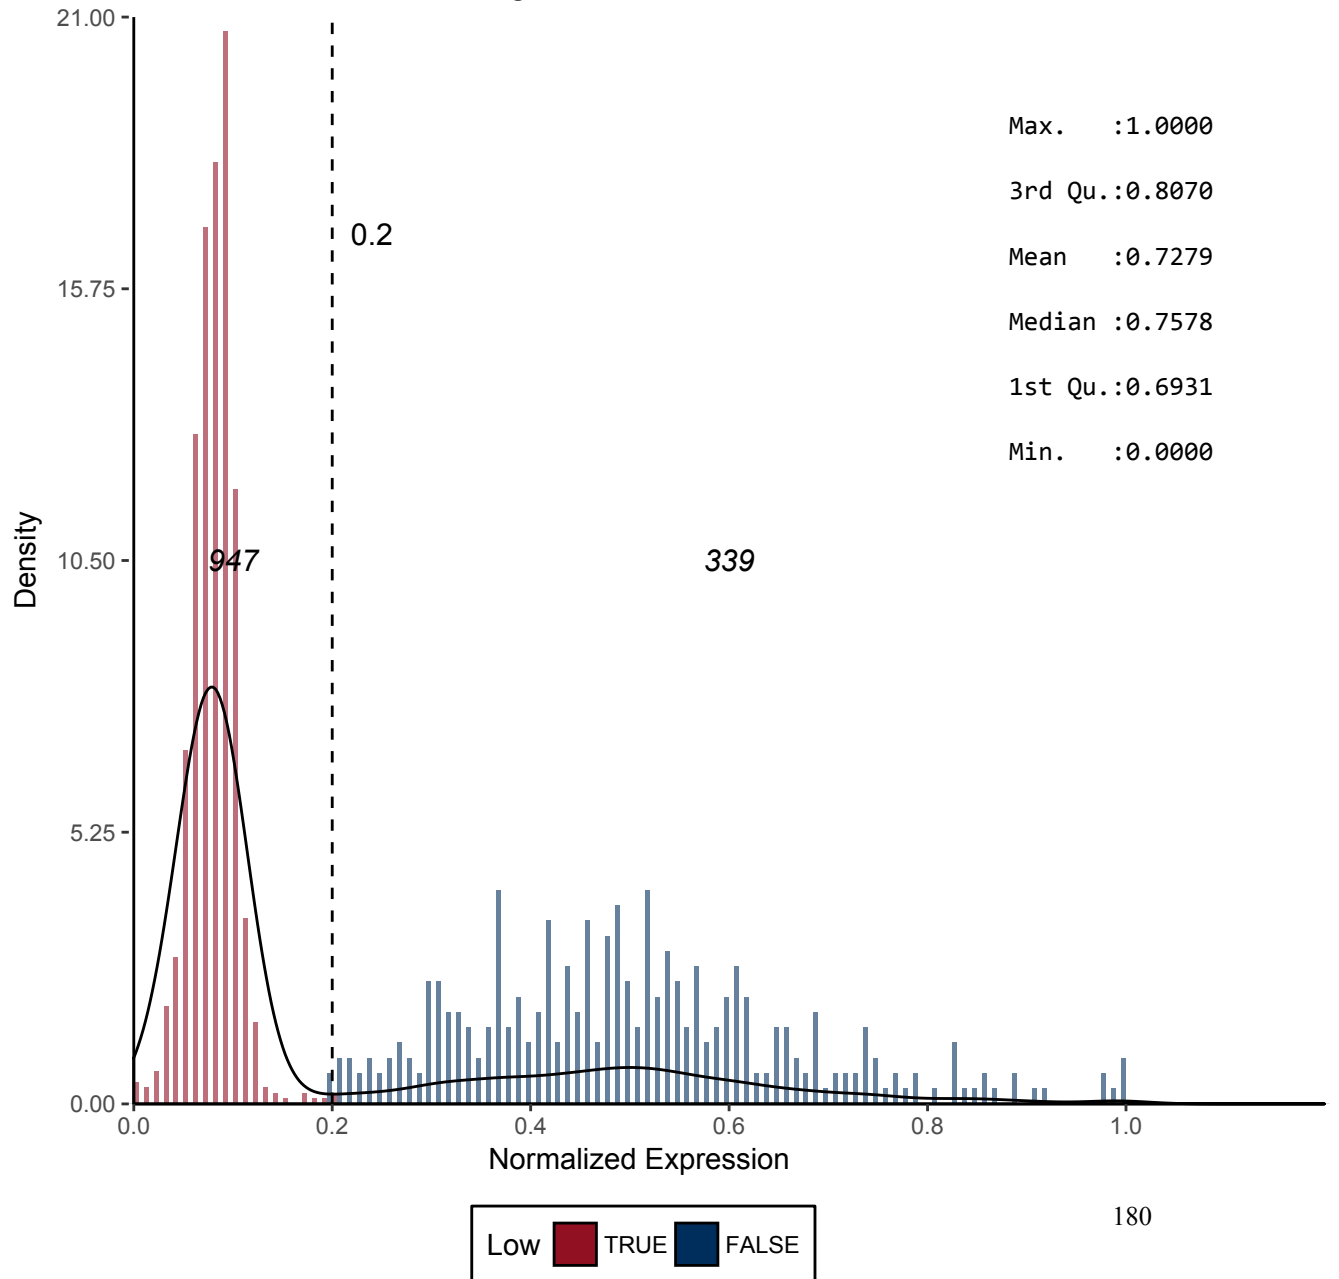

Figure 164 - CD147

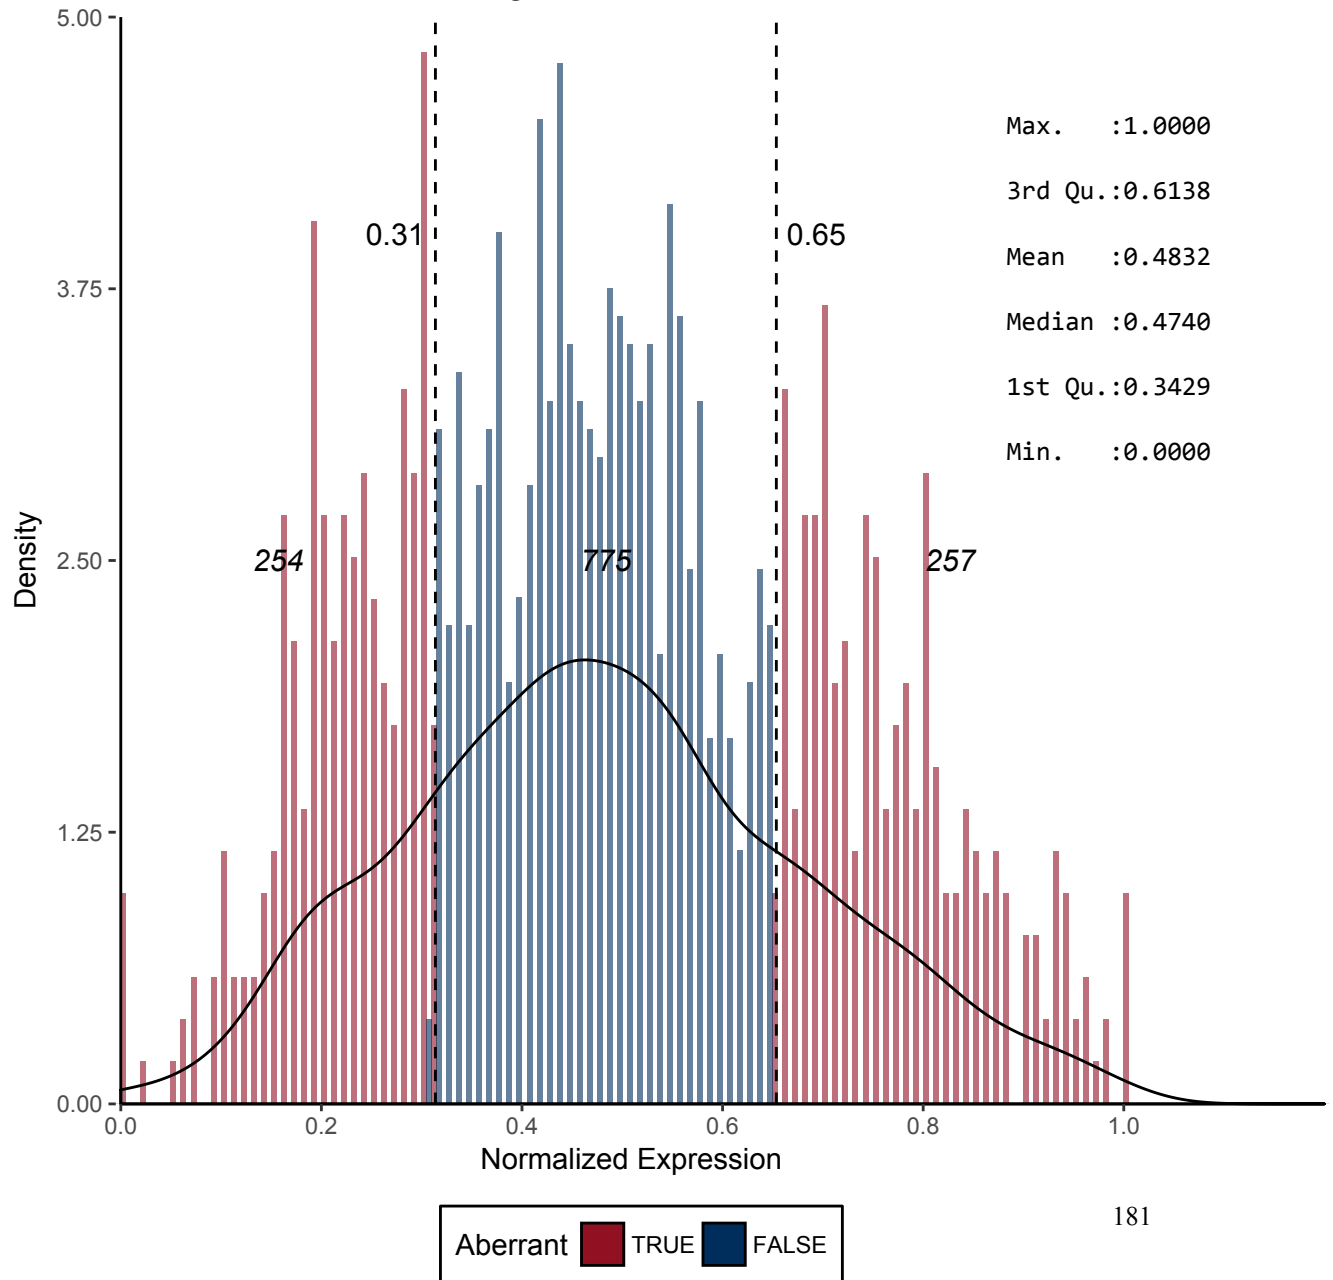

Figure 165 - CD148

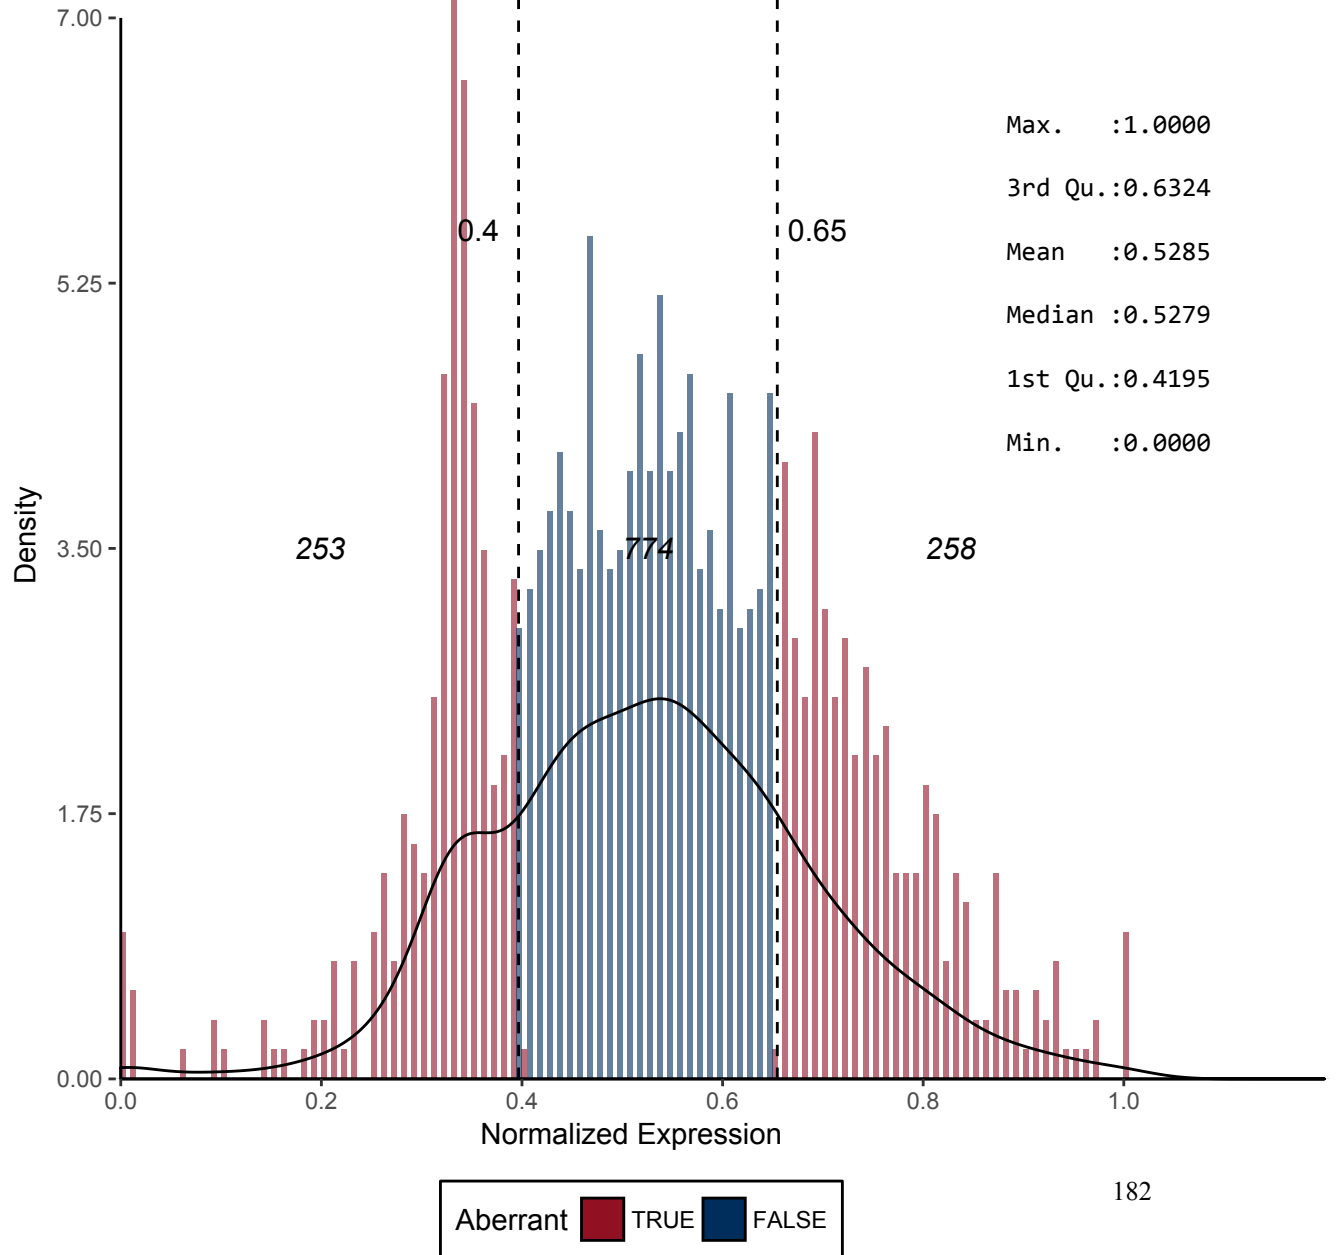

Figure 166 - CD150

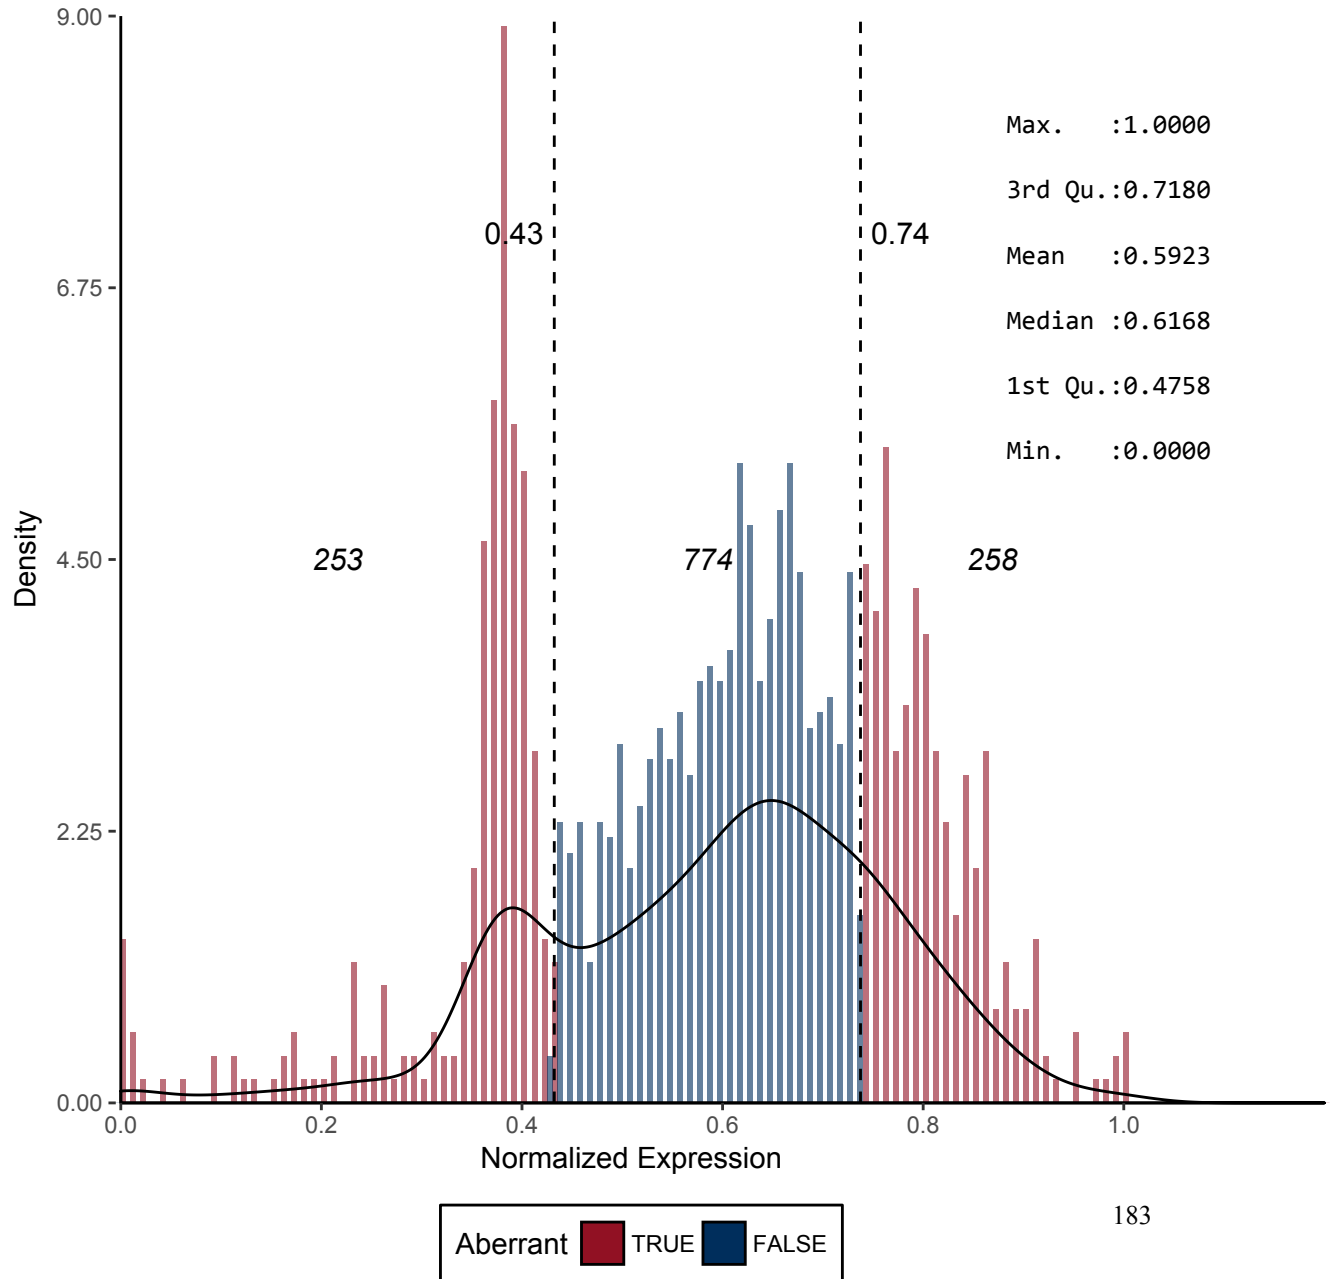

Figure 167 - CD151

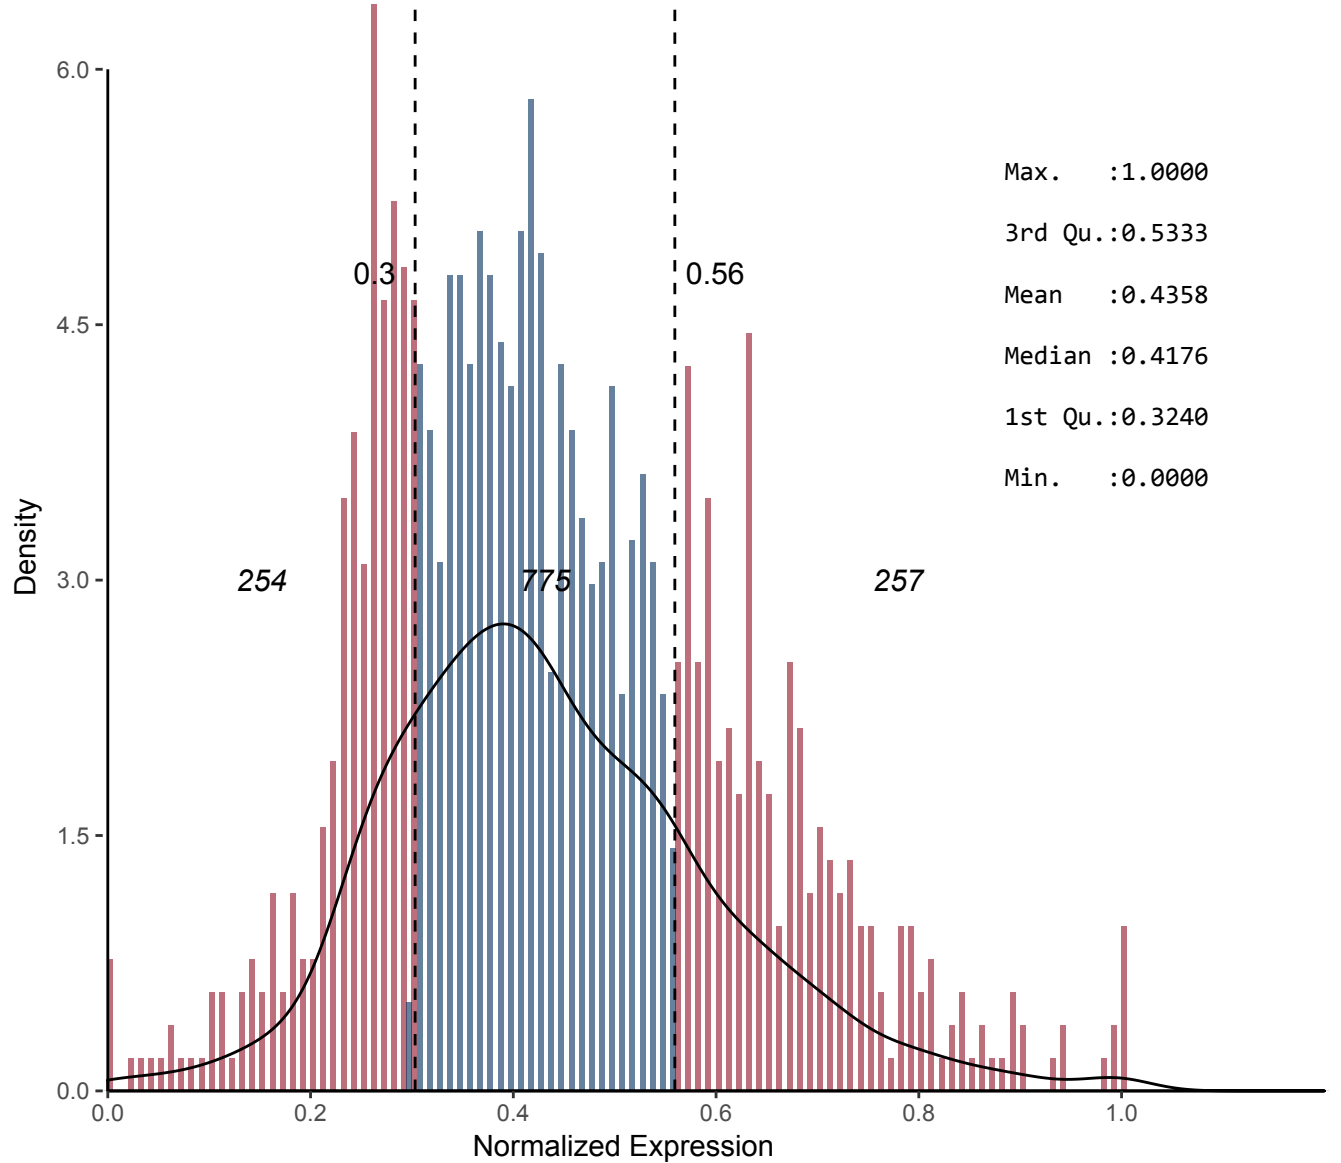

Aberrant TRUE FALSE



Figure 168 - CD152

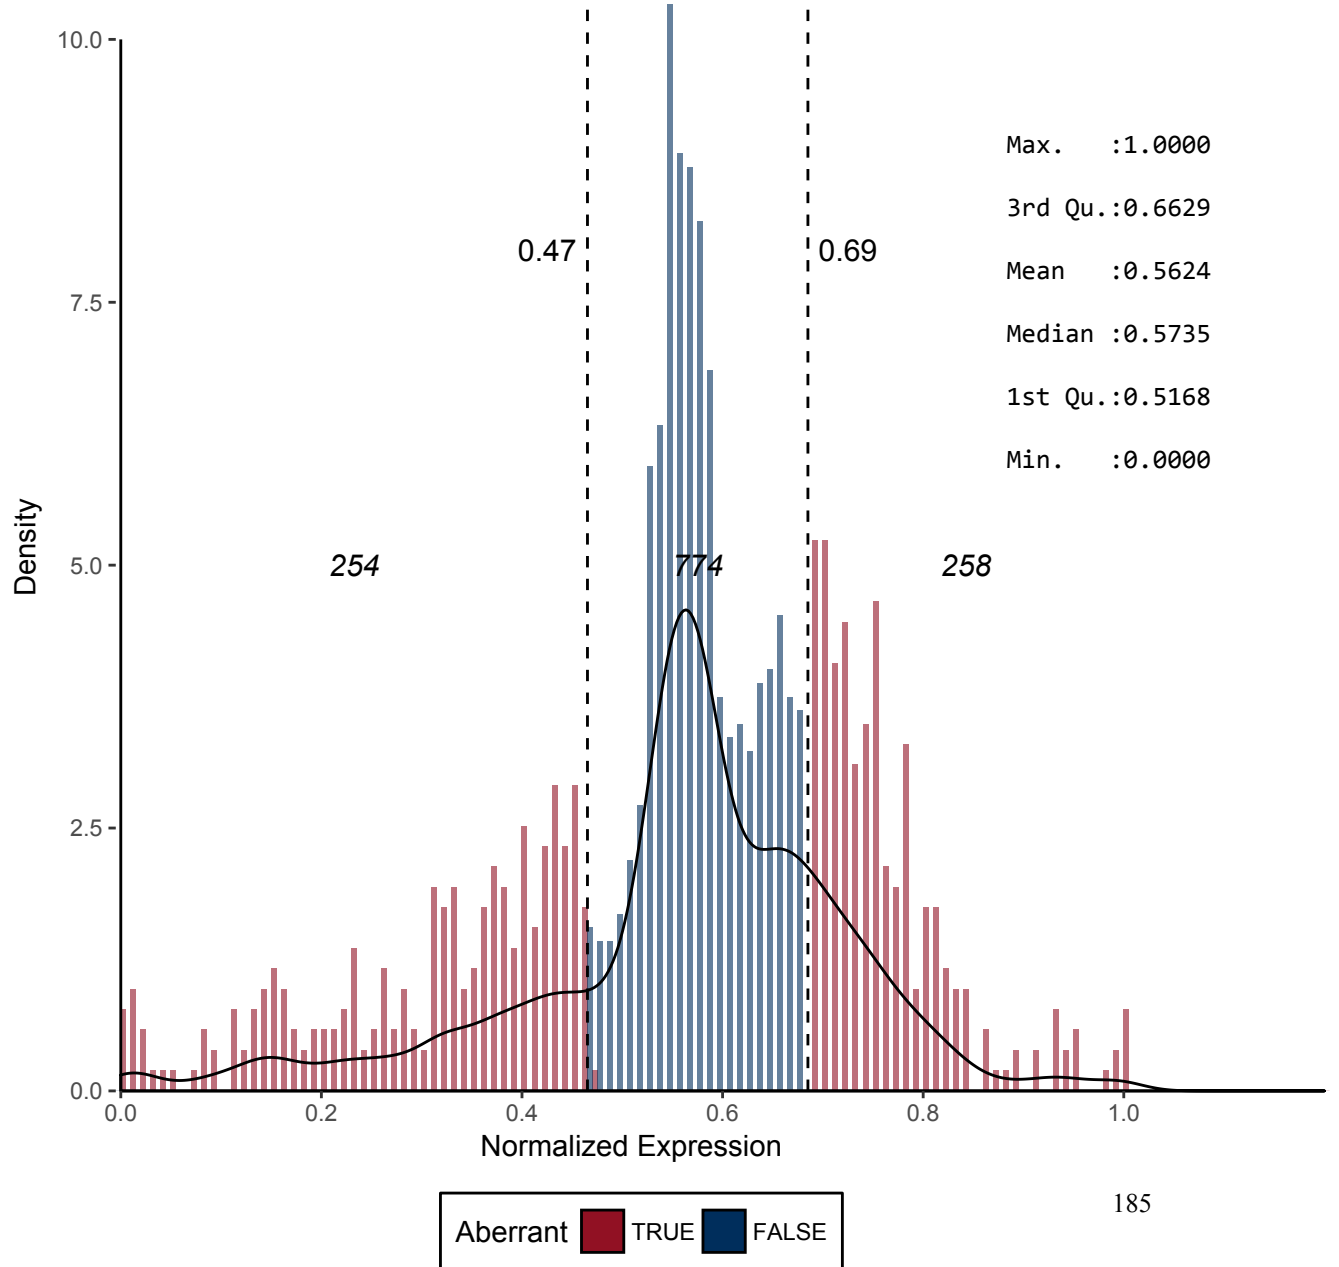

Figure 169 - CD153

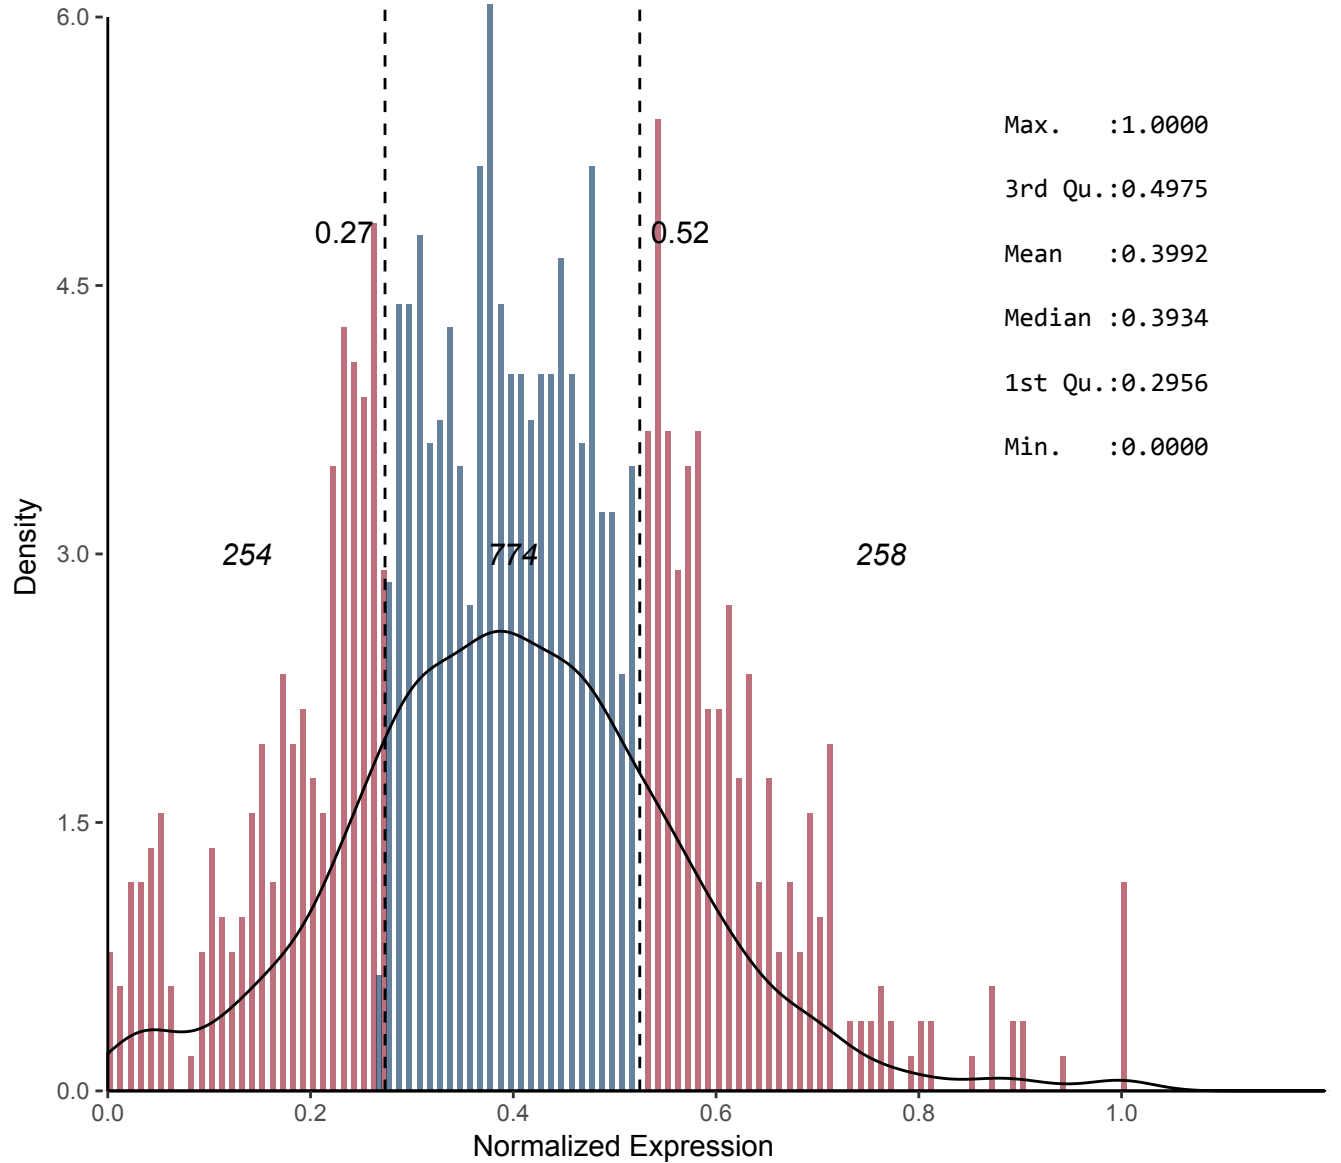

Aberrant TRUE FALSE

Figure 170 - CD154\*

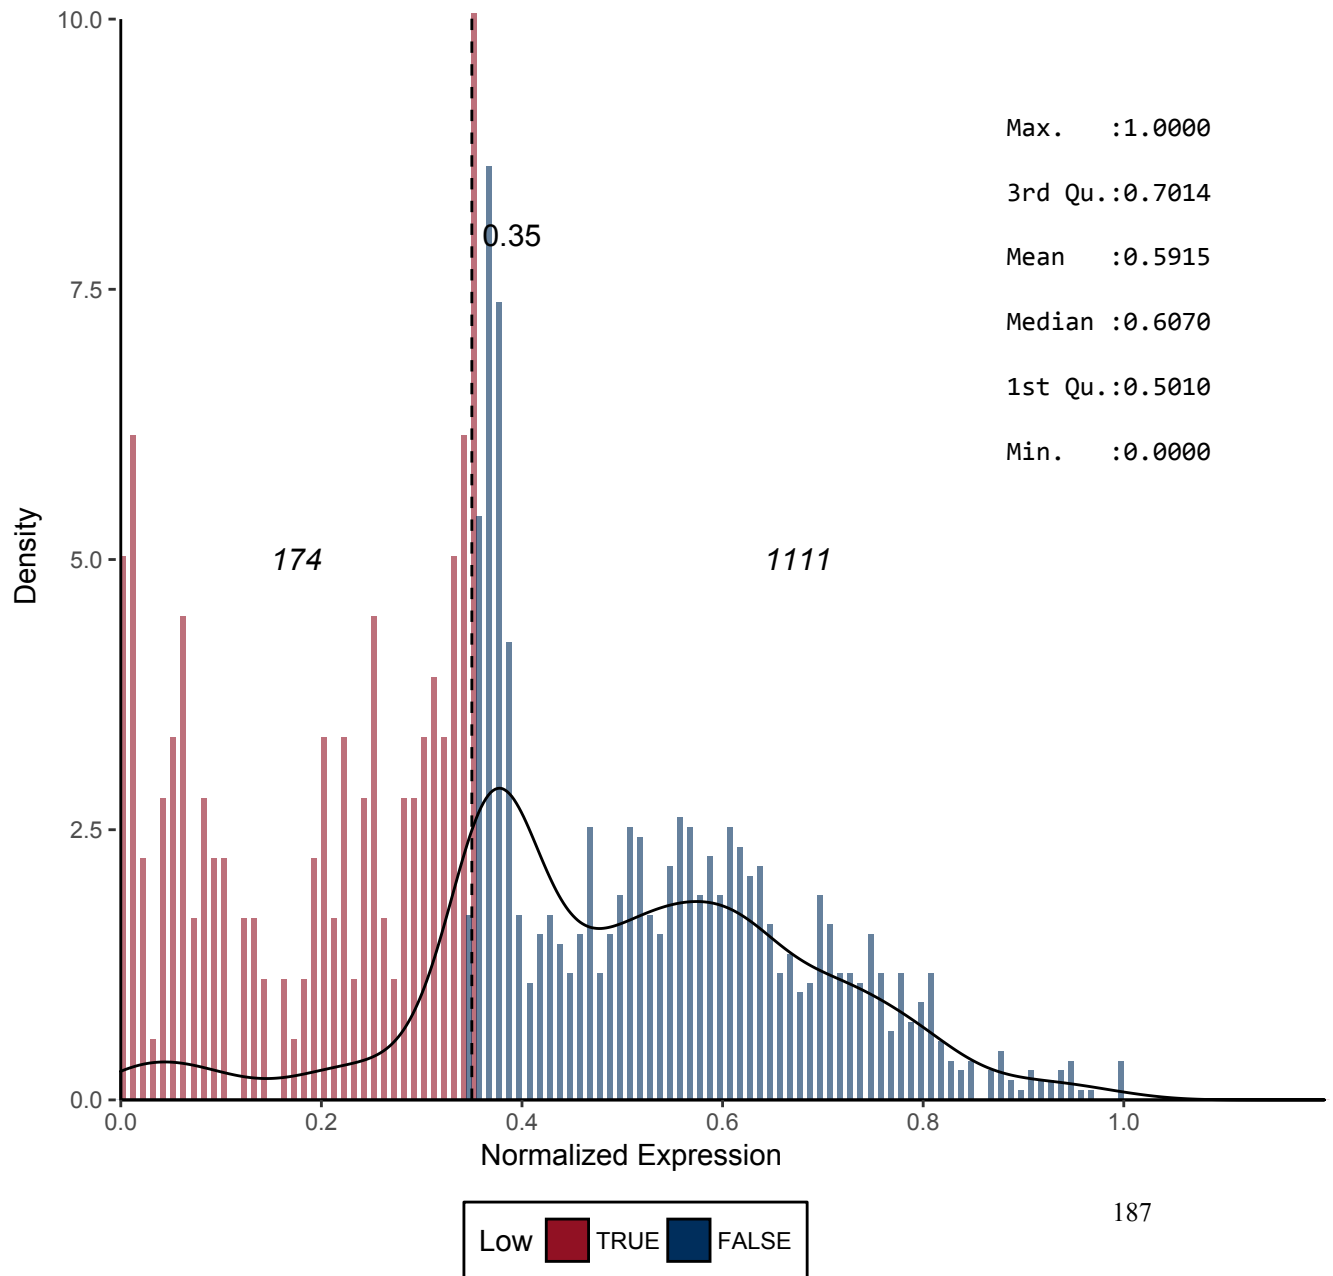

Figure 171 - CD155

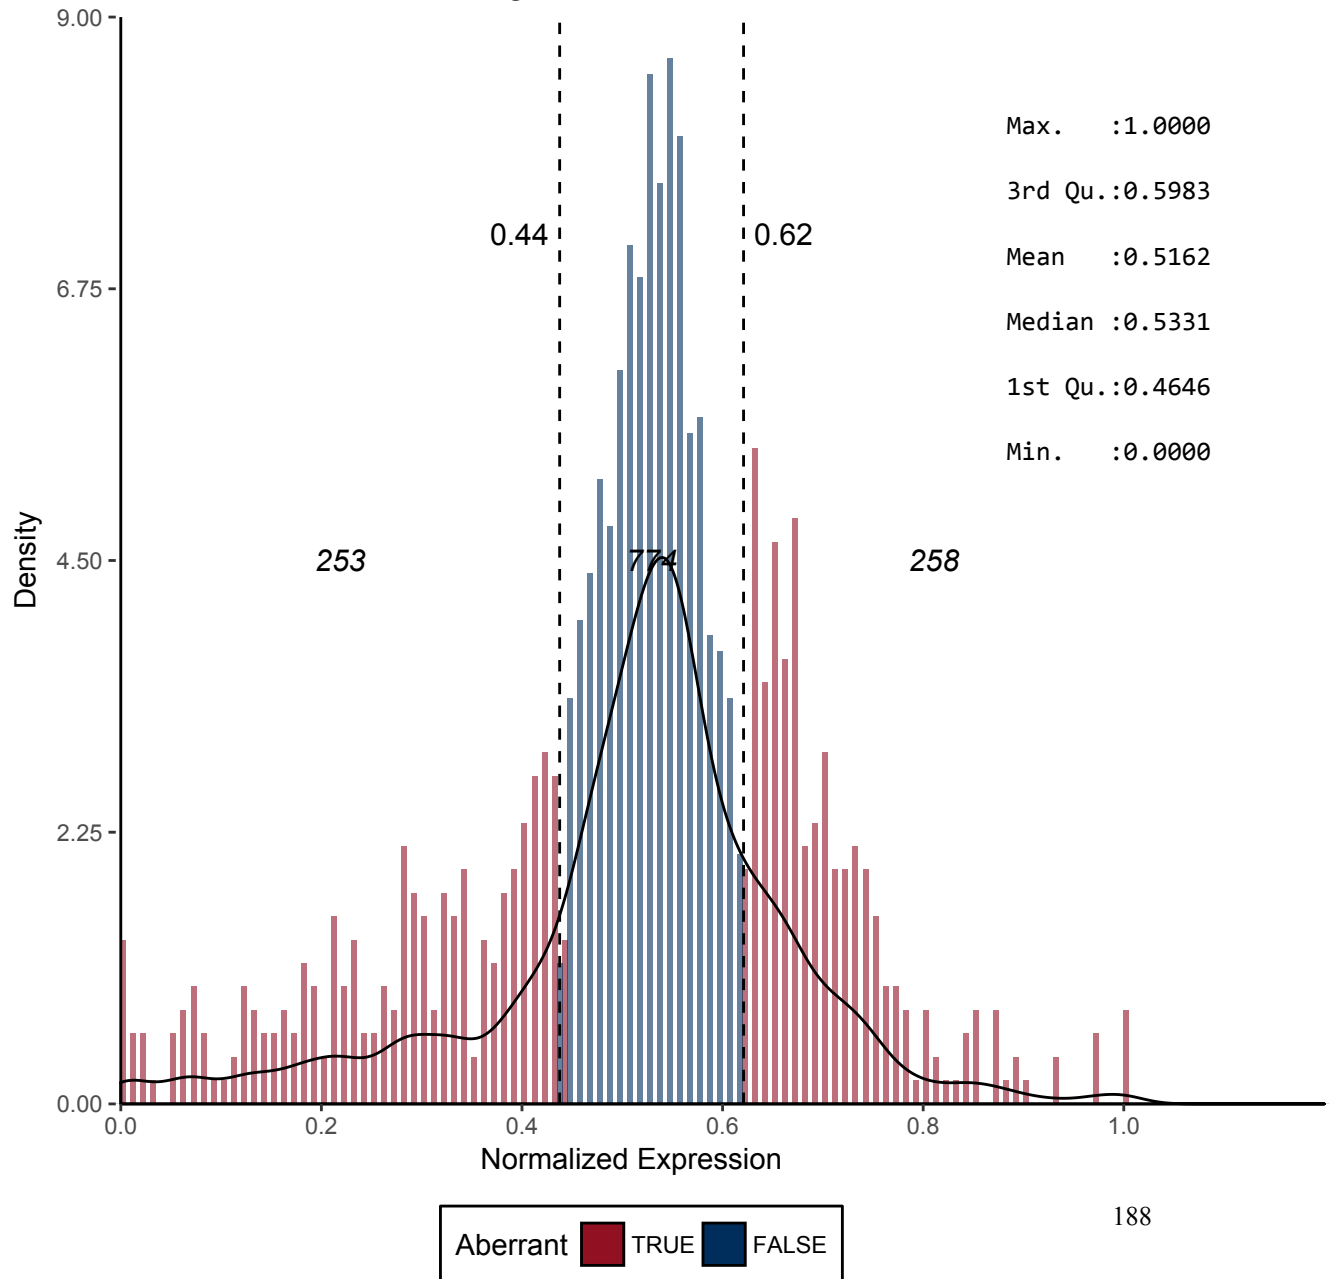

Figure 172 - CD156A

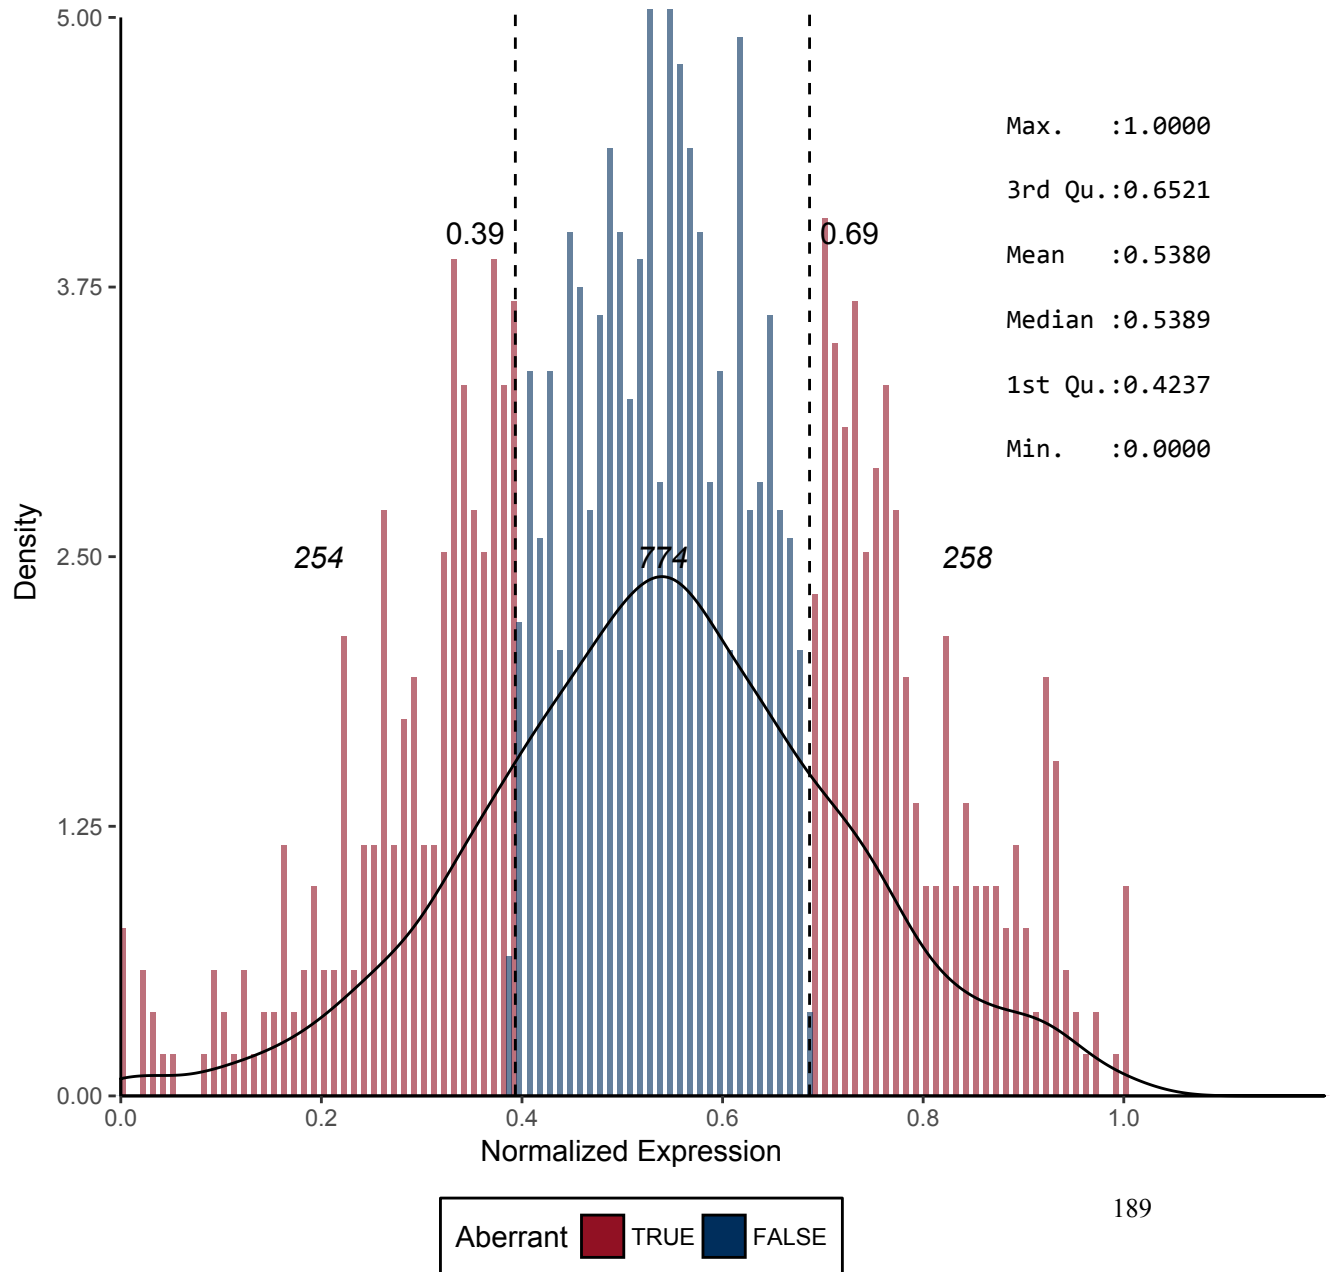

Figure 173 - CD156C

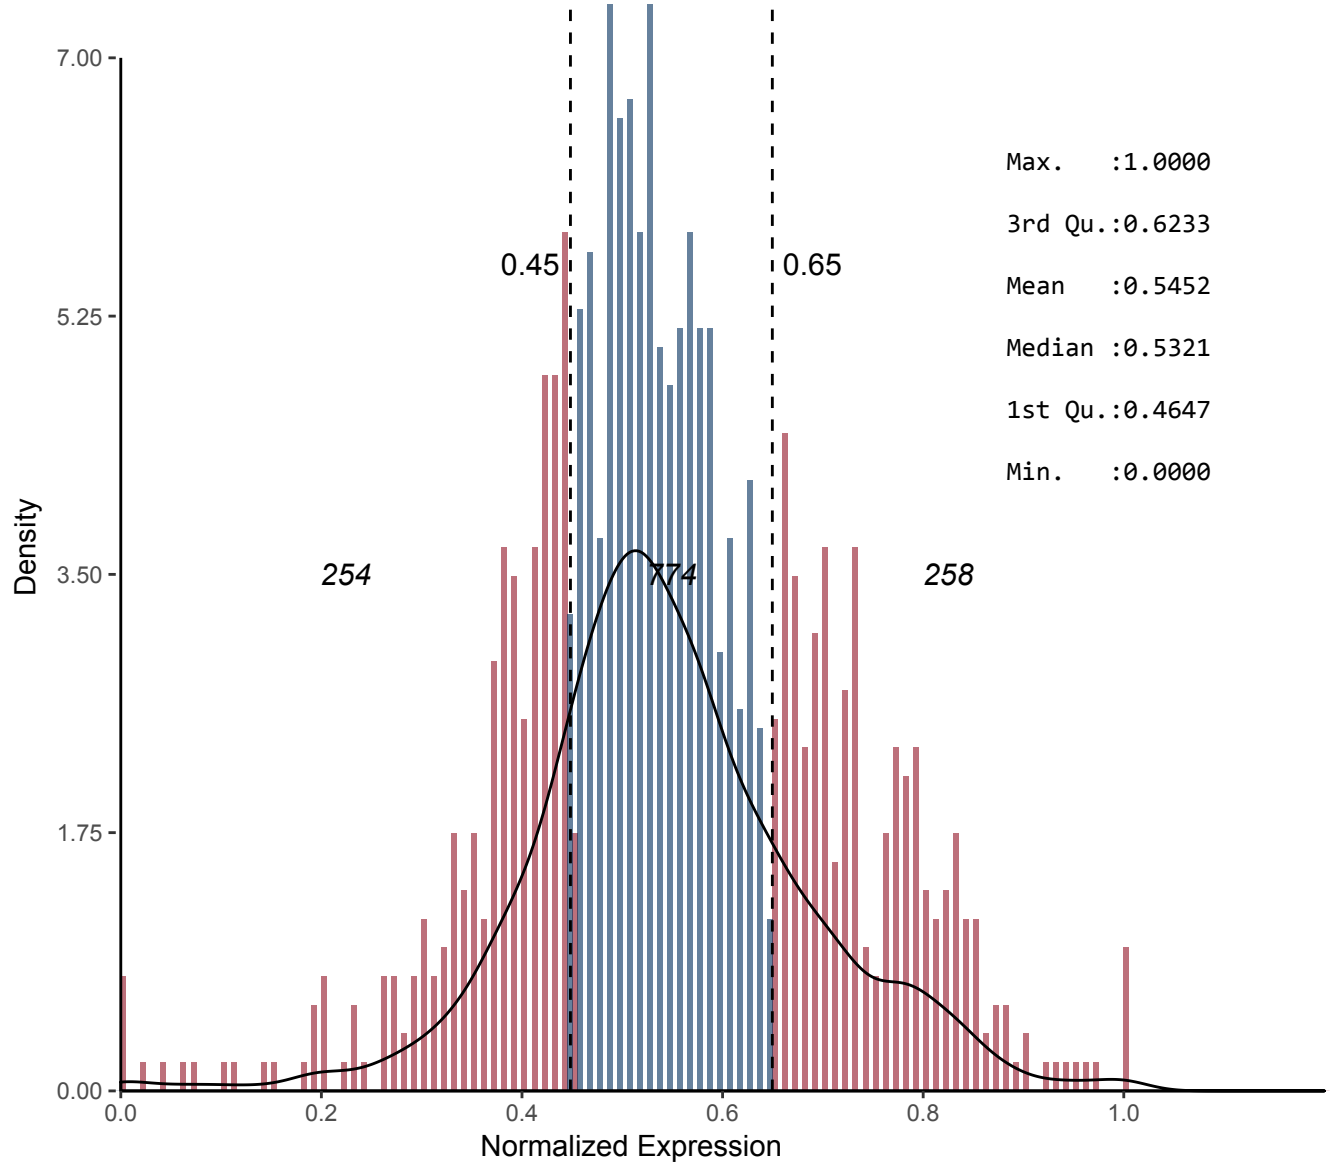

Aberrant TRUE FALSE

Figure 174 - CD157

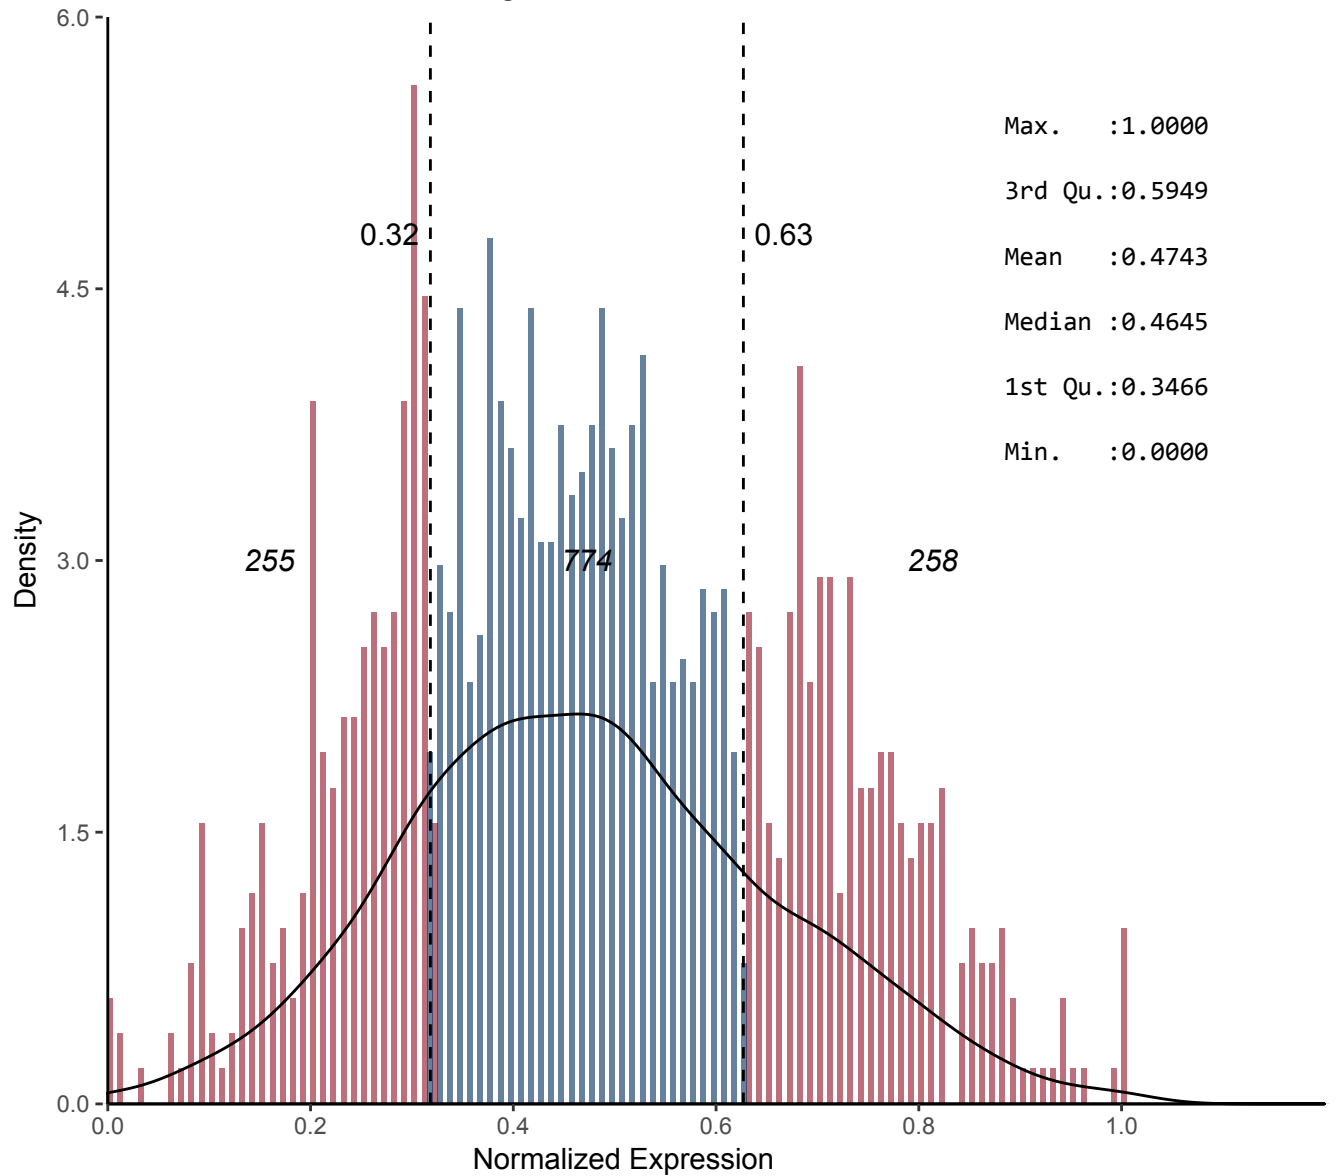

Aberrant TRUE FALSE

Figure 175 - CD158E

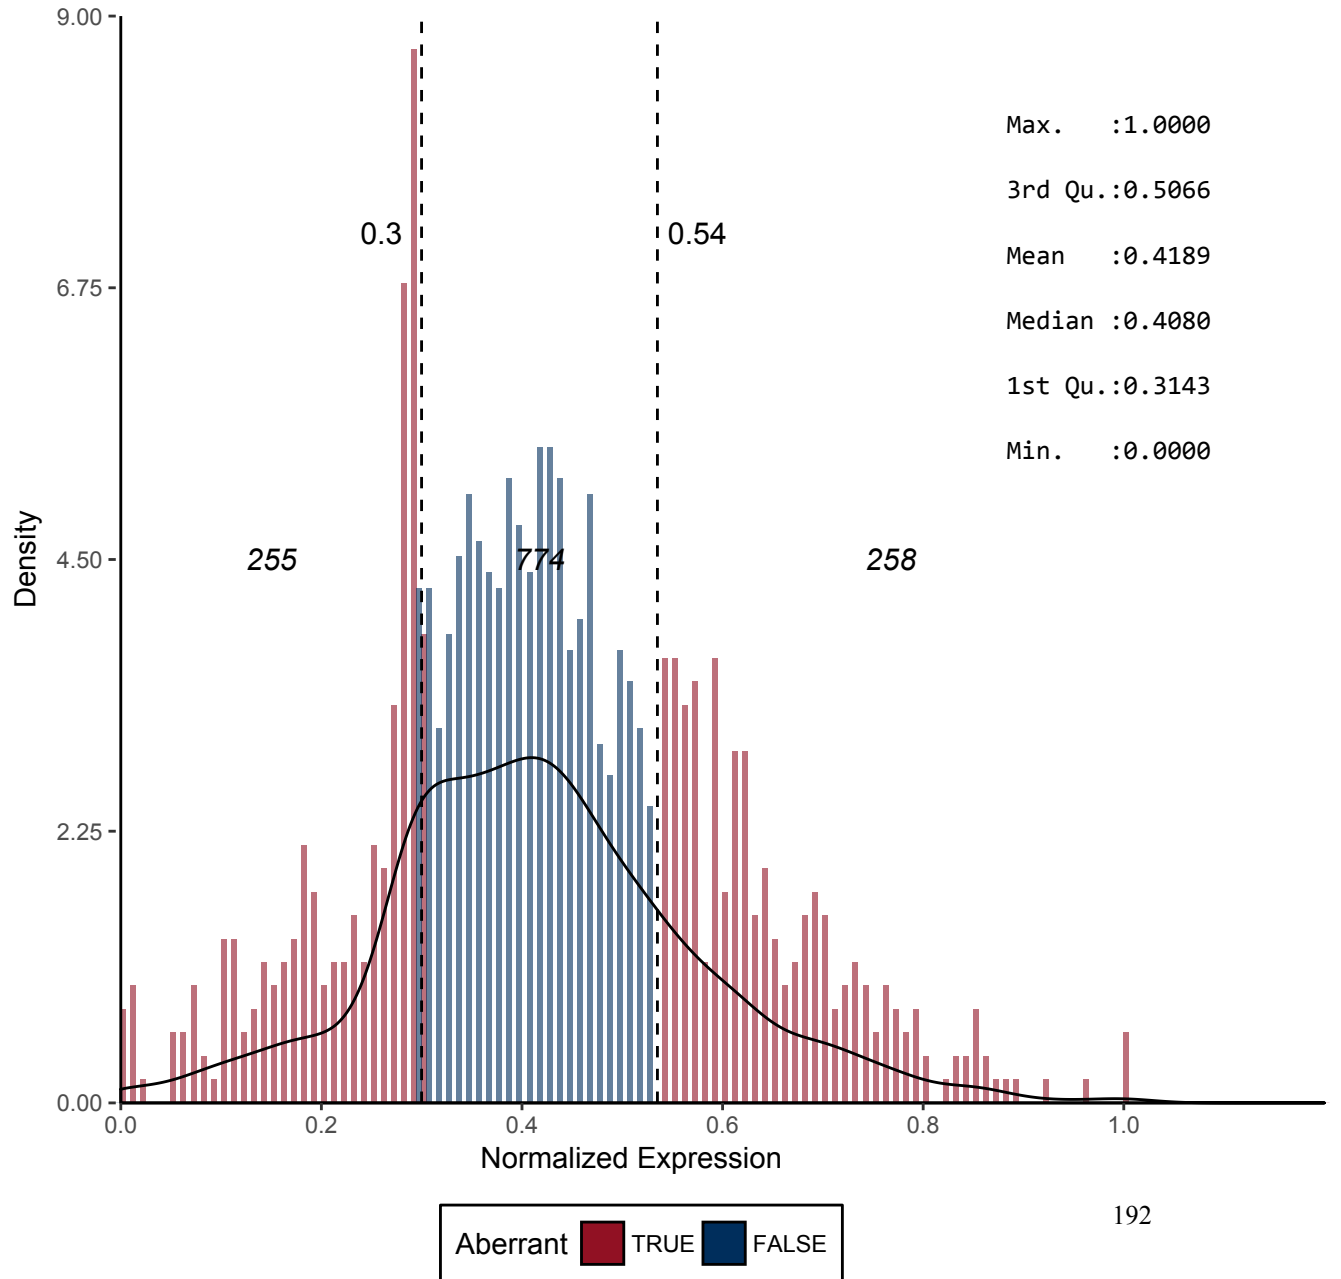



Figure 176 - CD158I\*

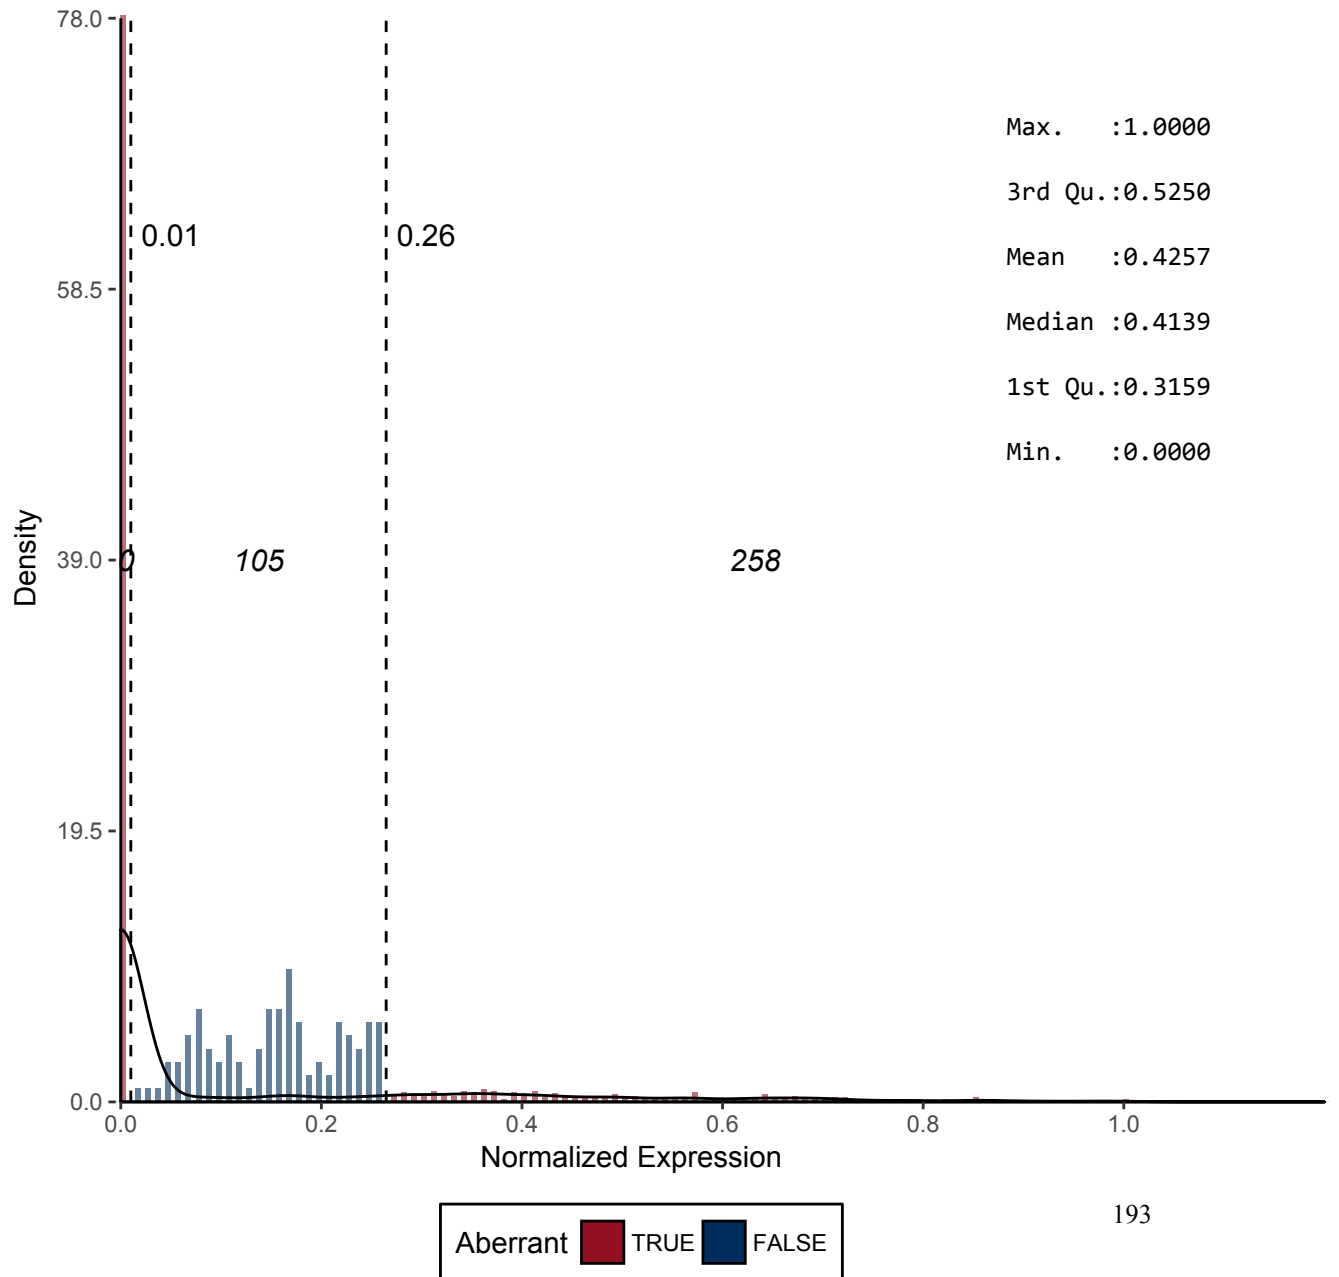

Figure 177 - CD158K

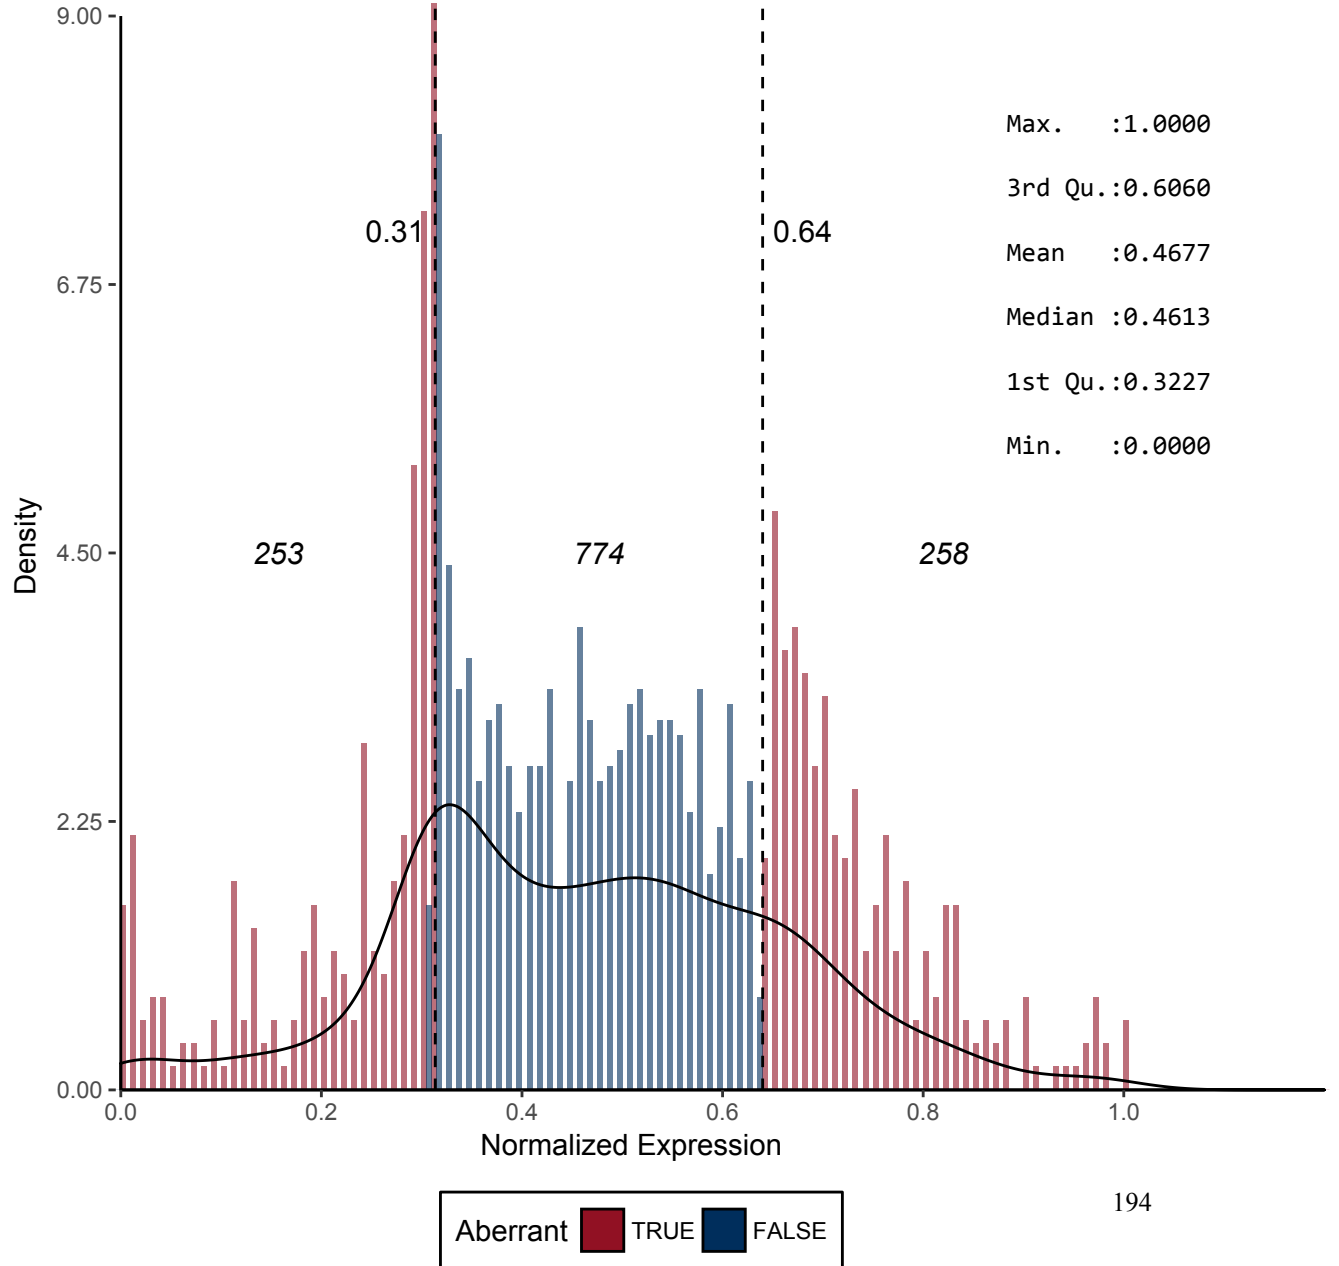

Figure 178 - CD160

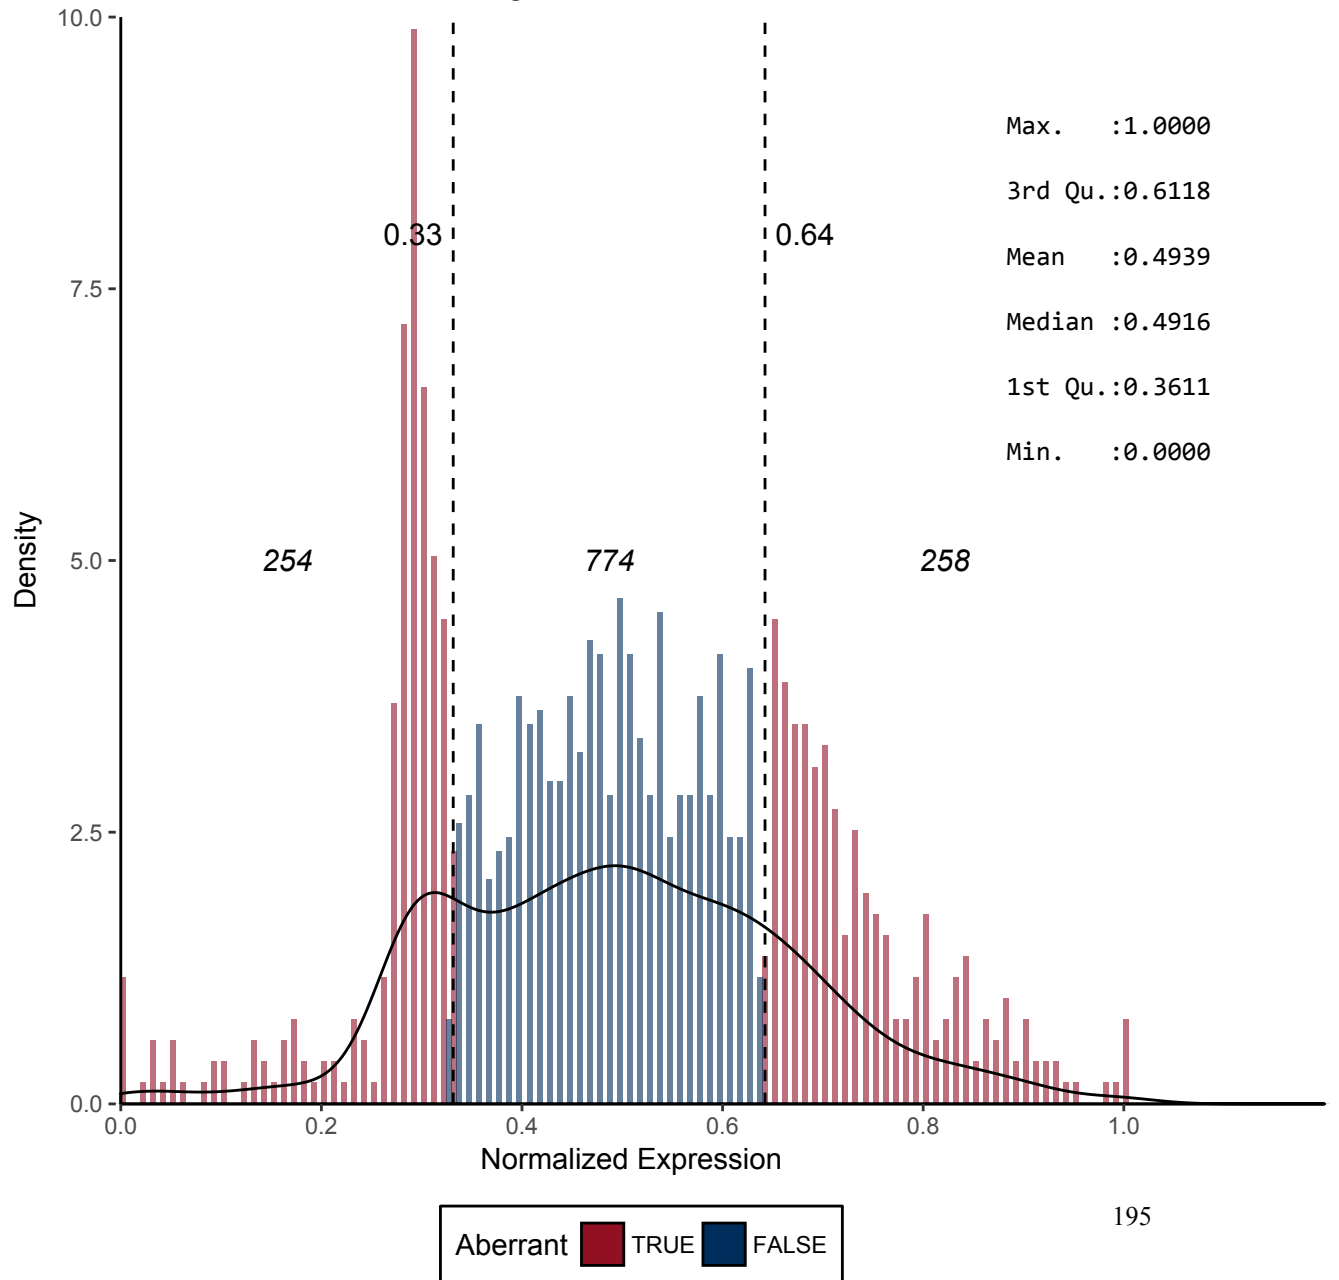

Figure 179 - CD161

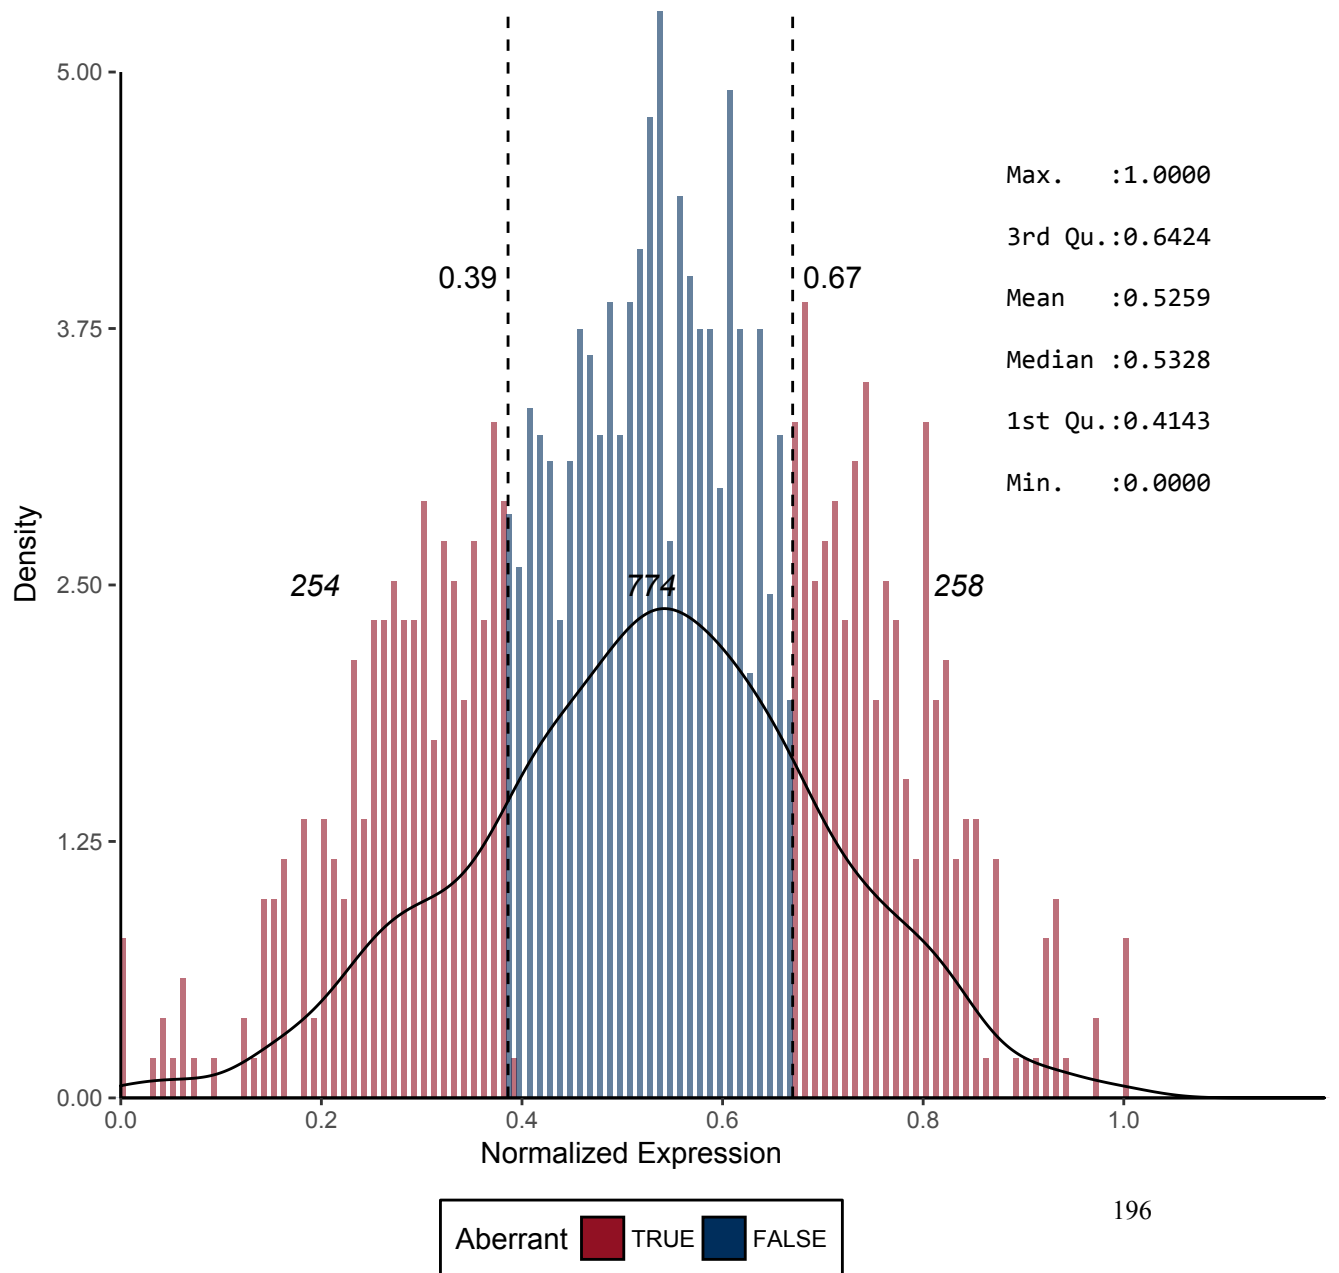

Figure 180 - CD162

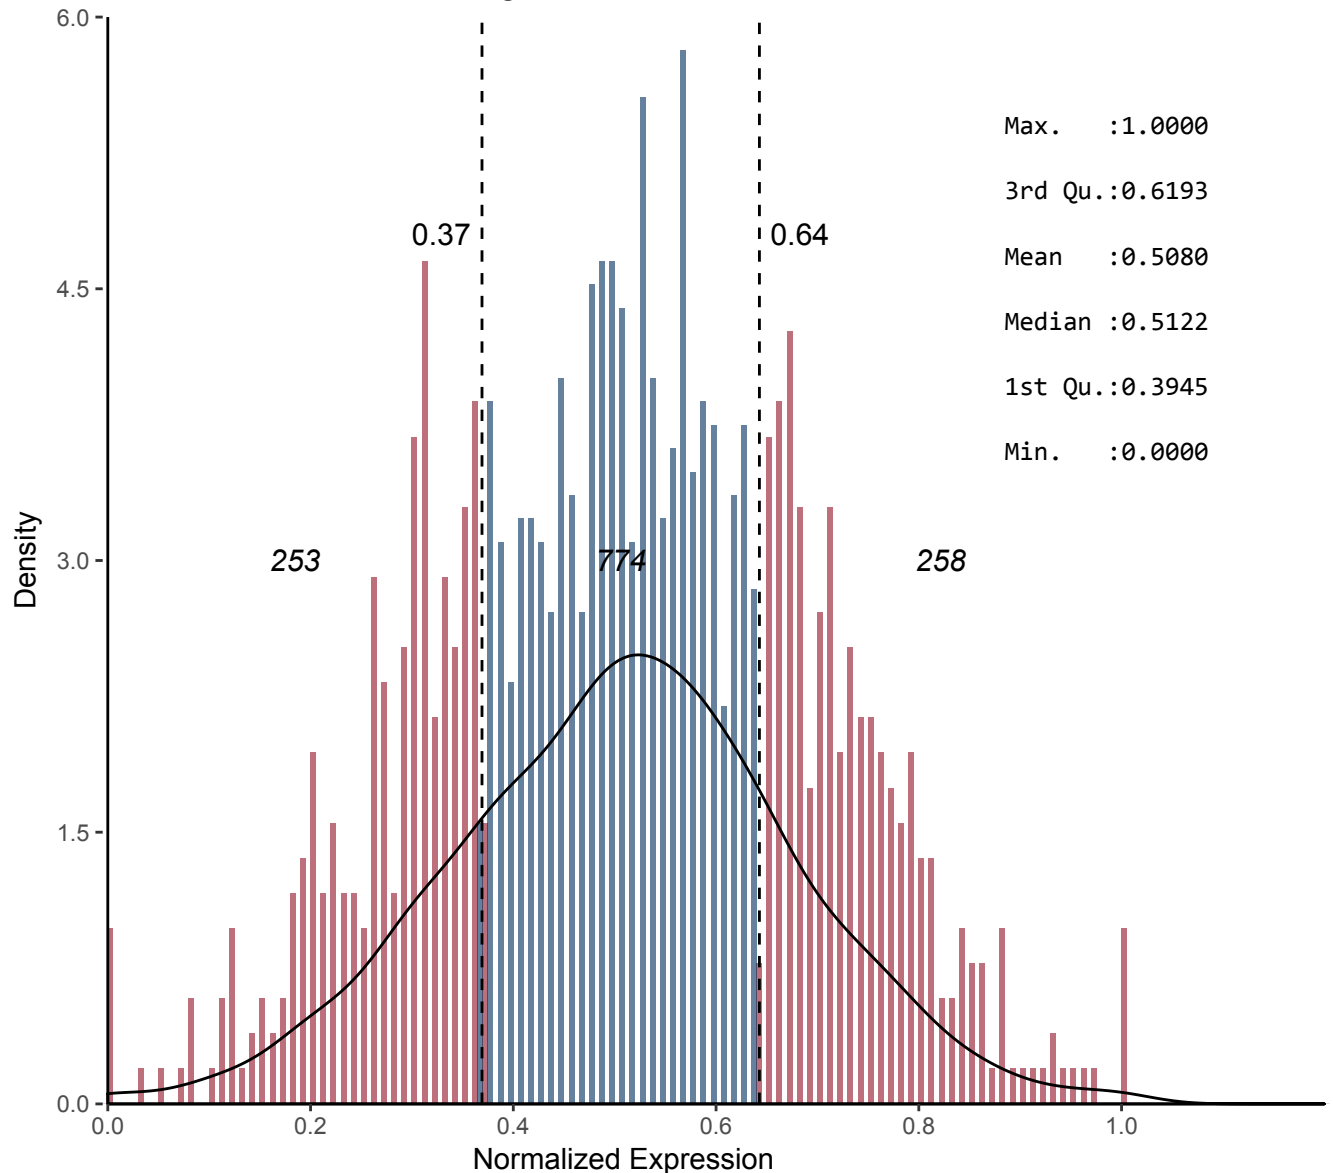

Aberrant TRUE FALSE

Figure 181 - CD163

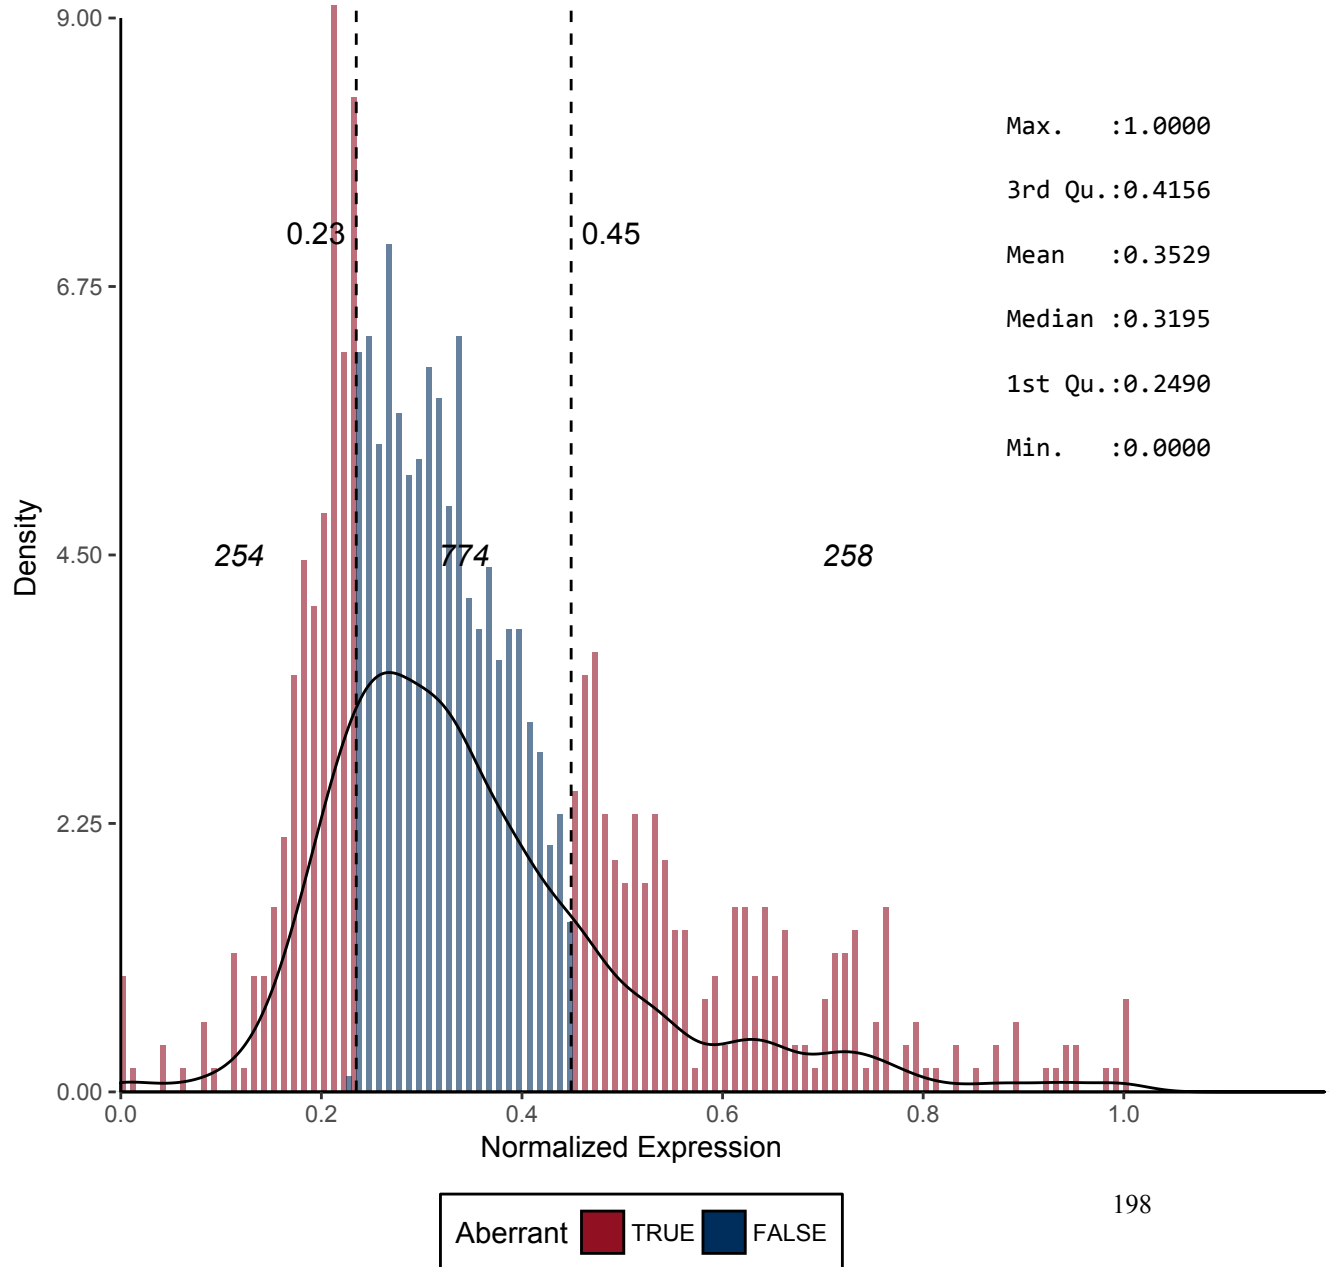

Figure 182 - CD164

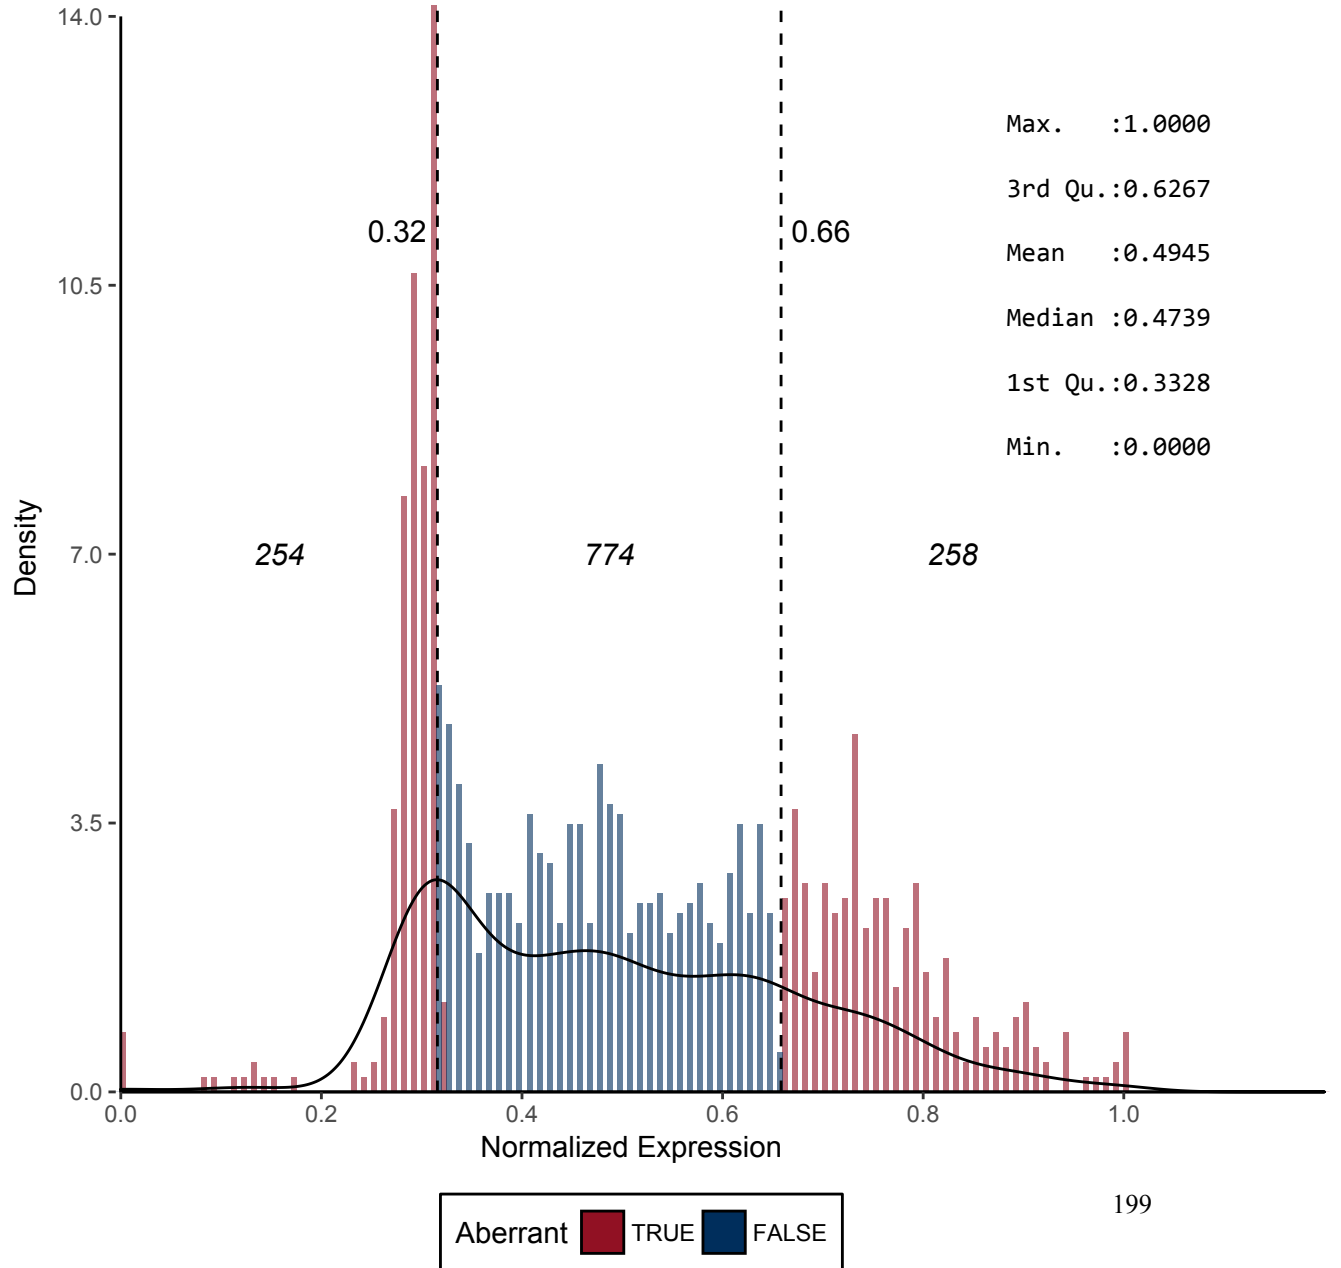

Figure 183 - CD166

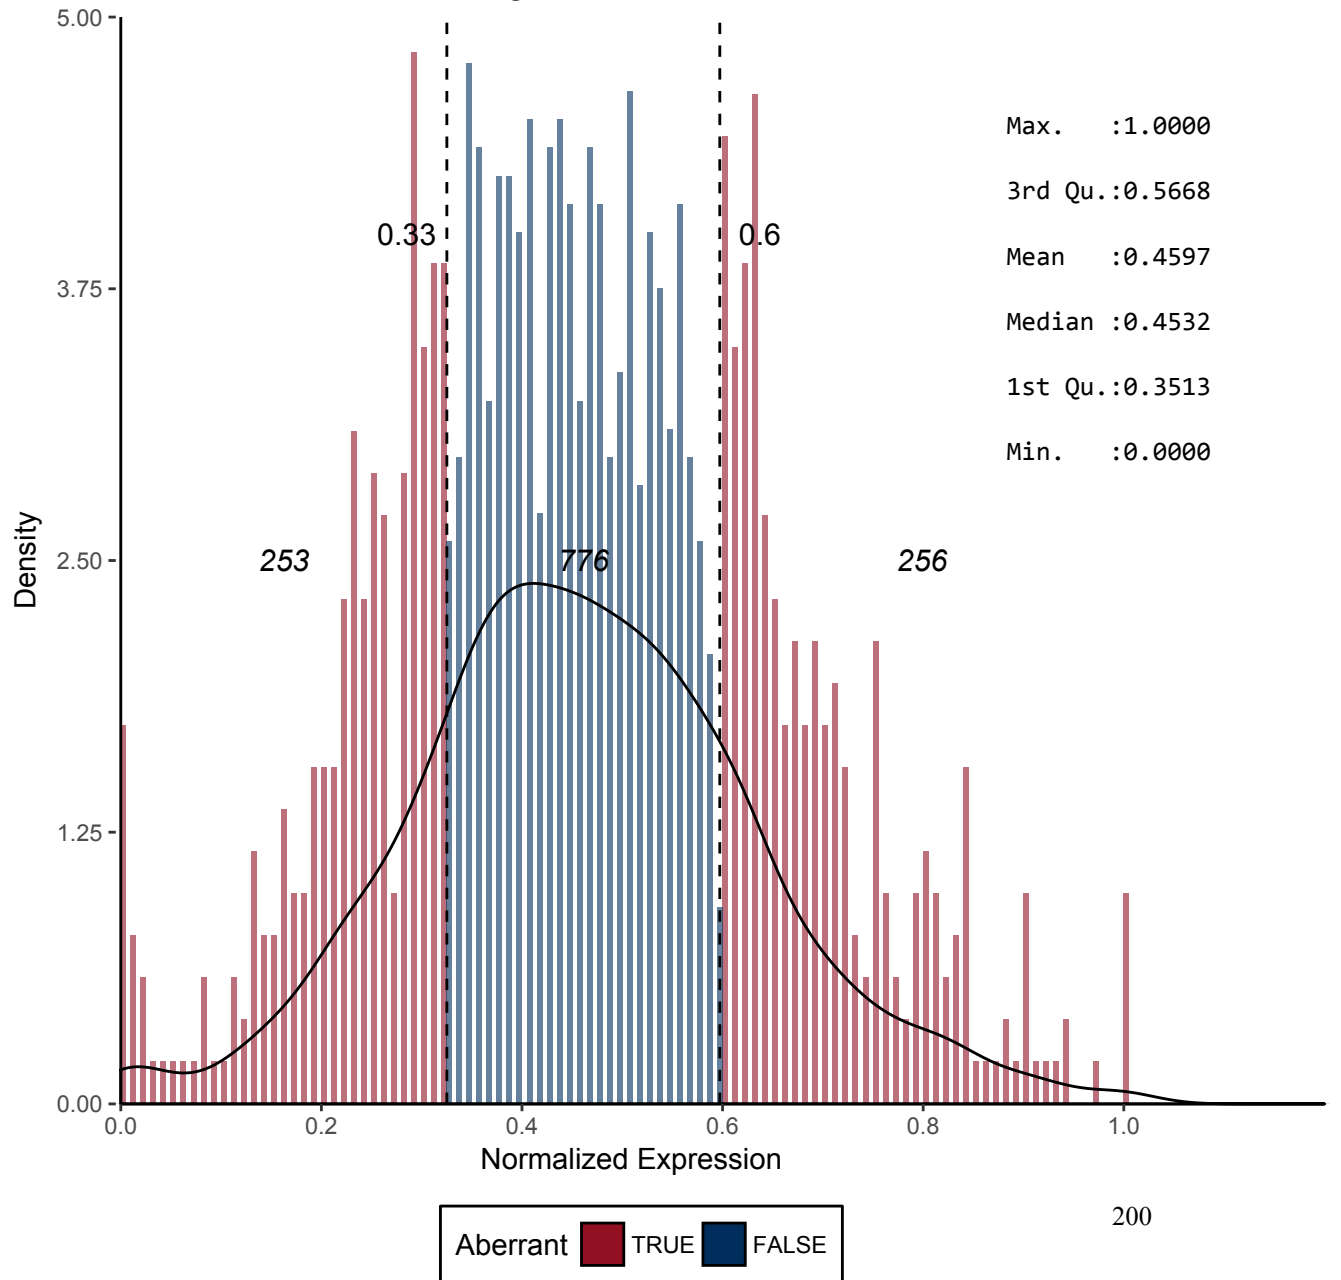



Figure 184 - CD167A

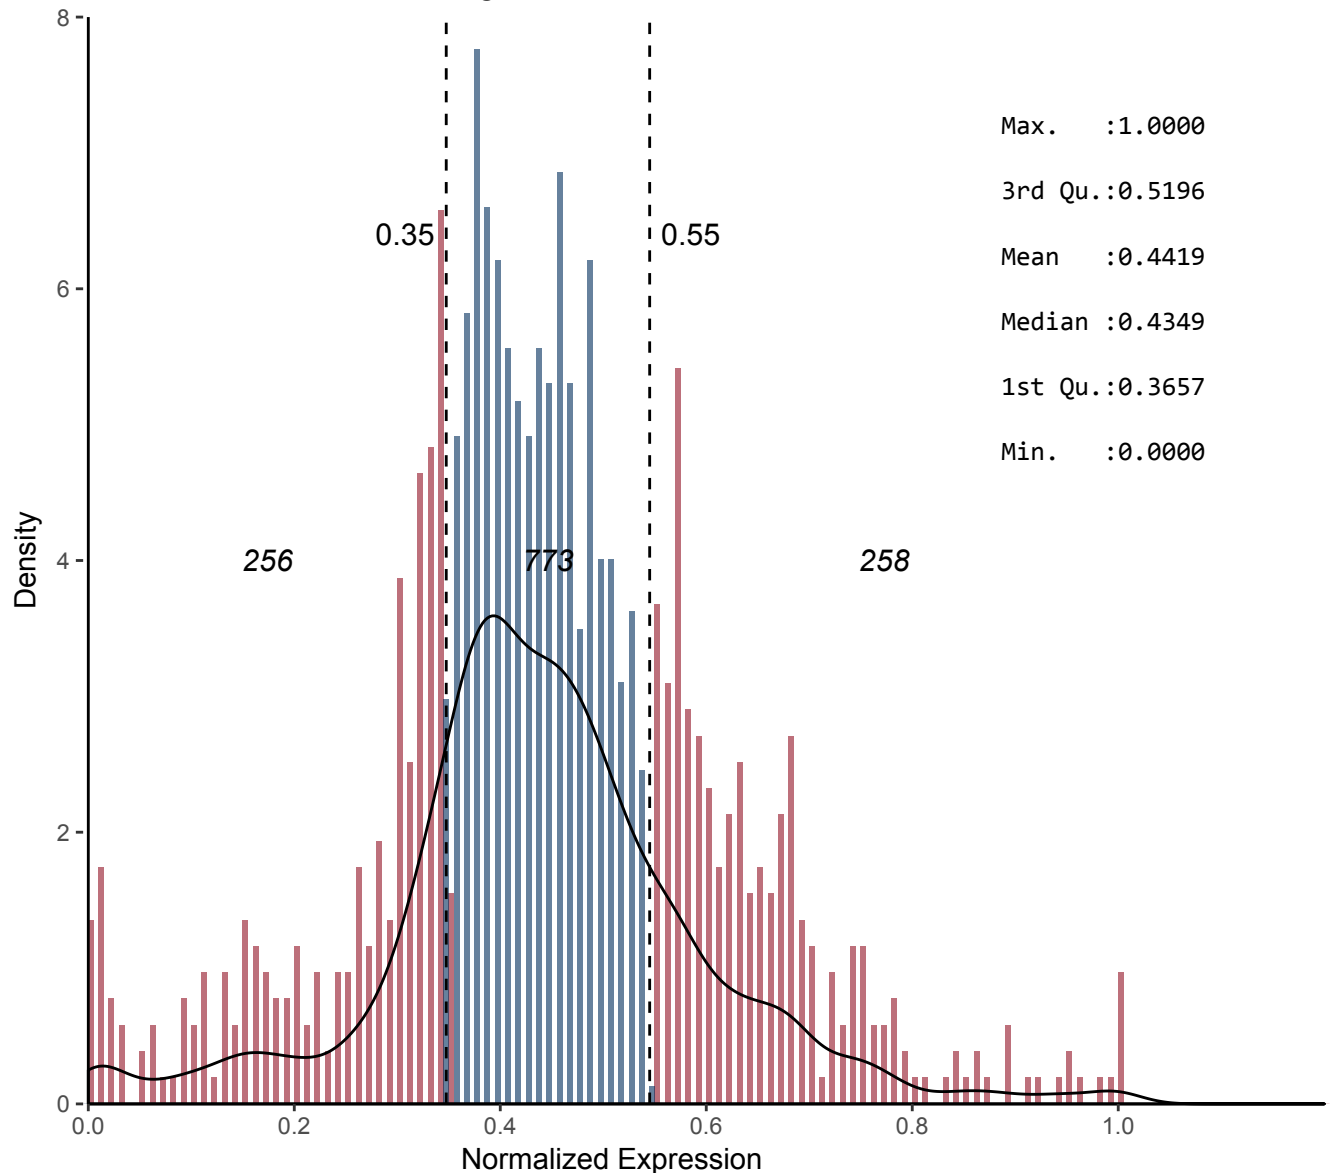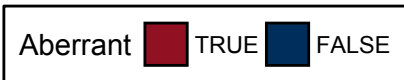

Figure 185 - CD167B\*

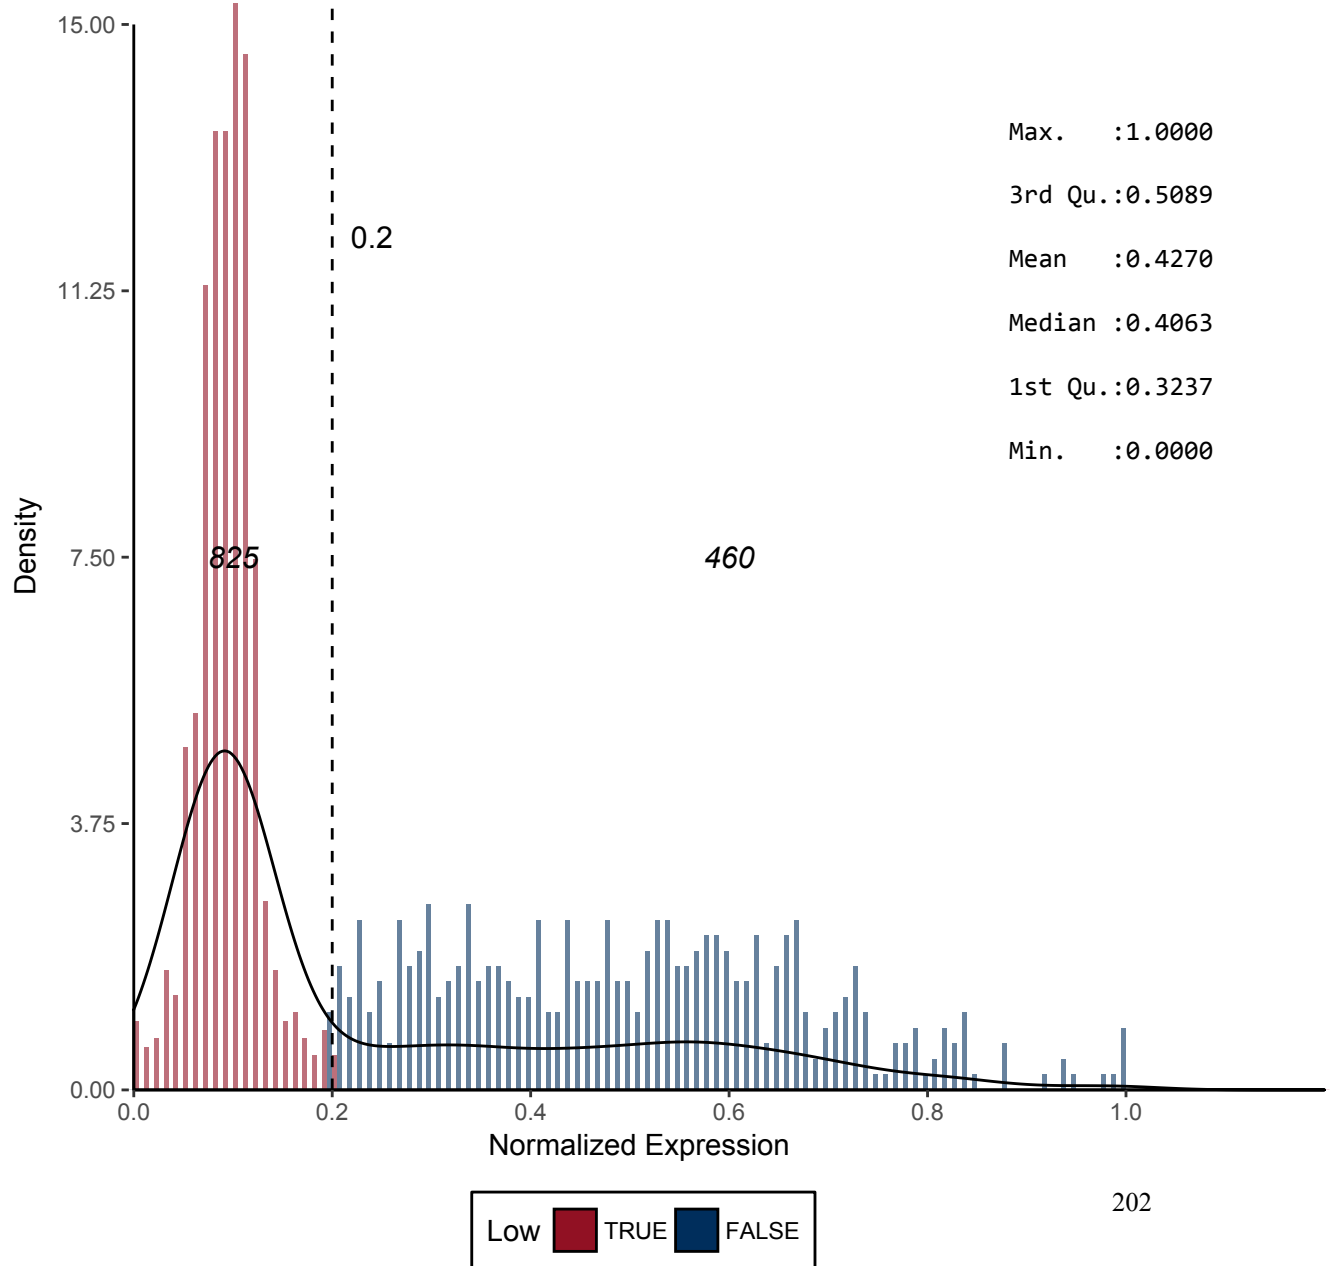

Figure 186 - CD168\*

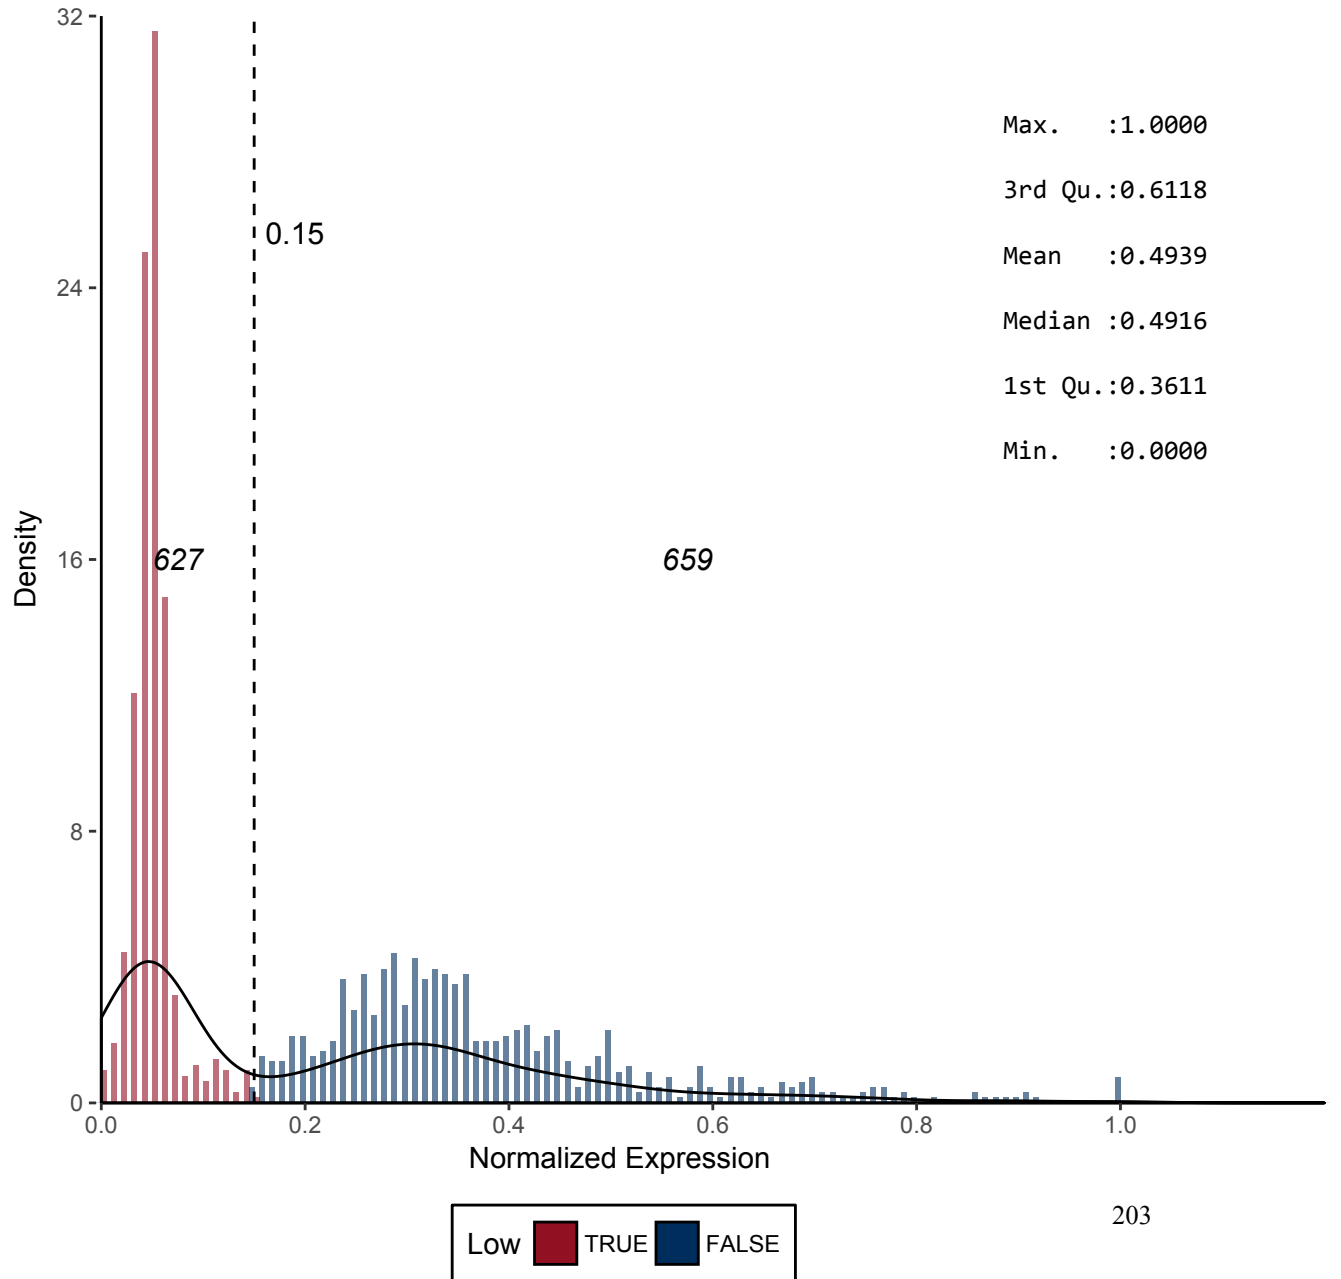

Figure 187 - CD169\*

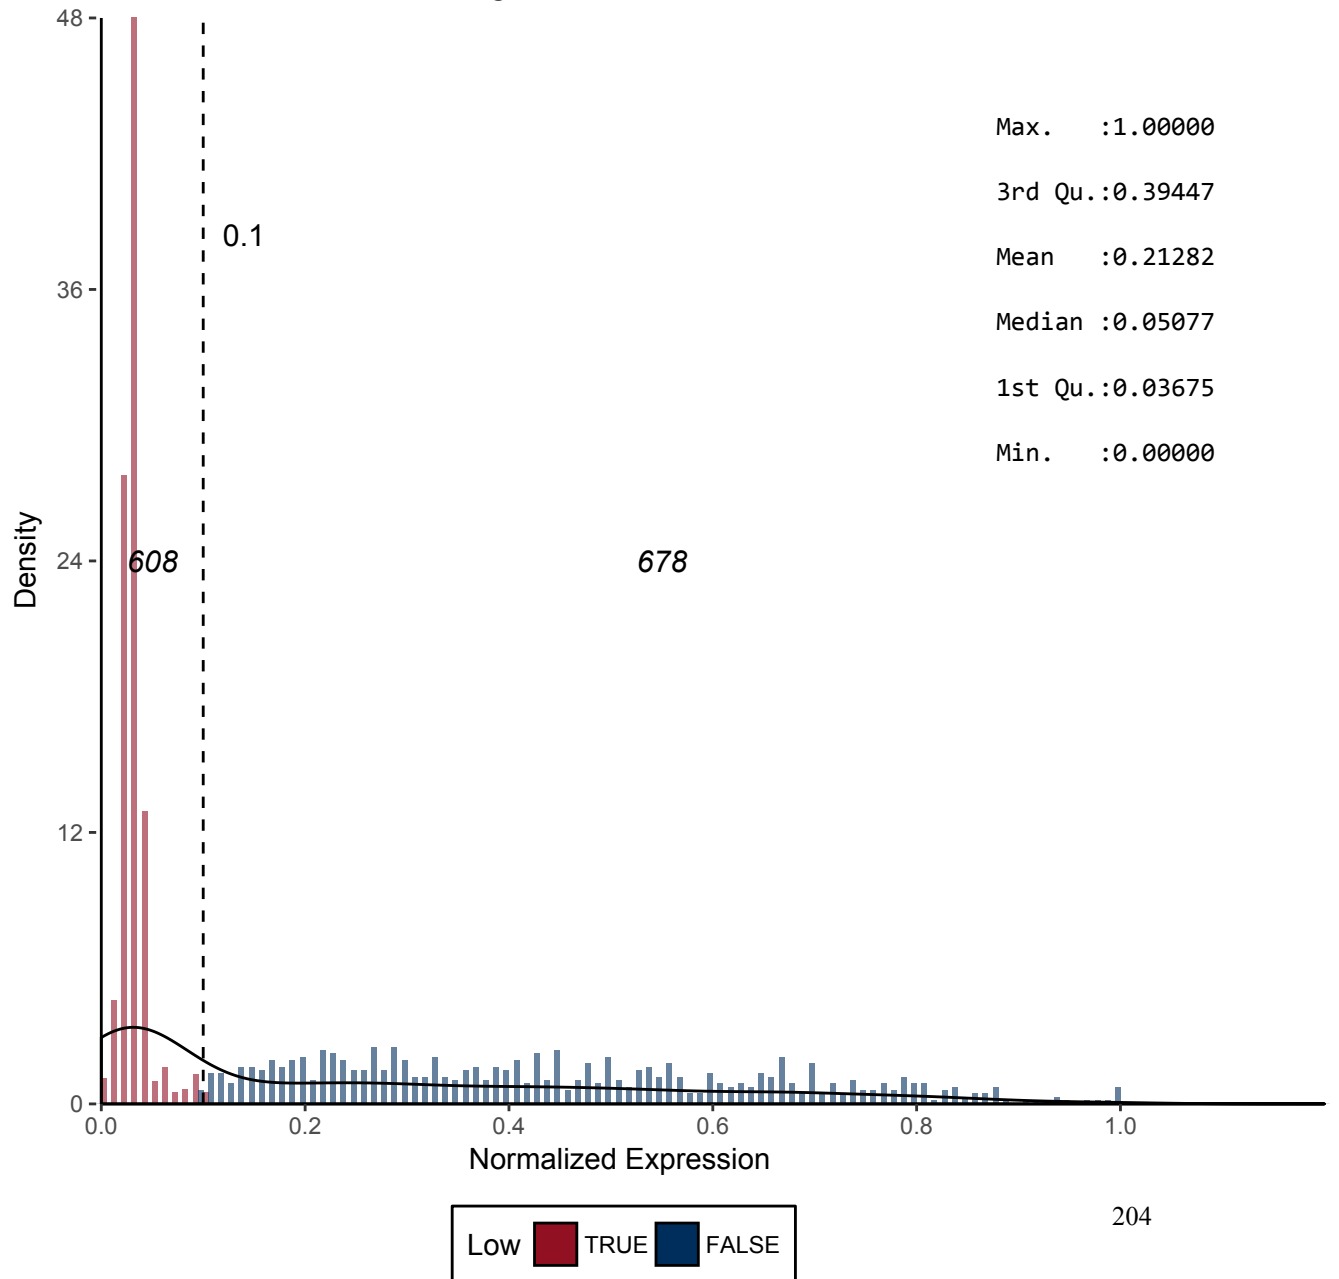

Figure 188 - CD170

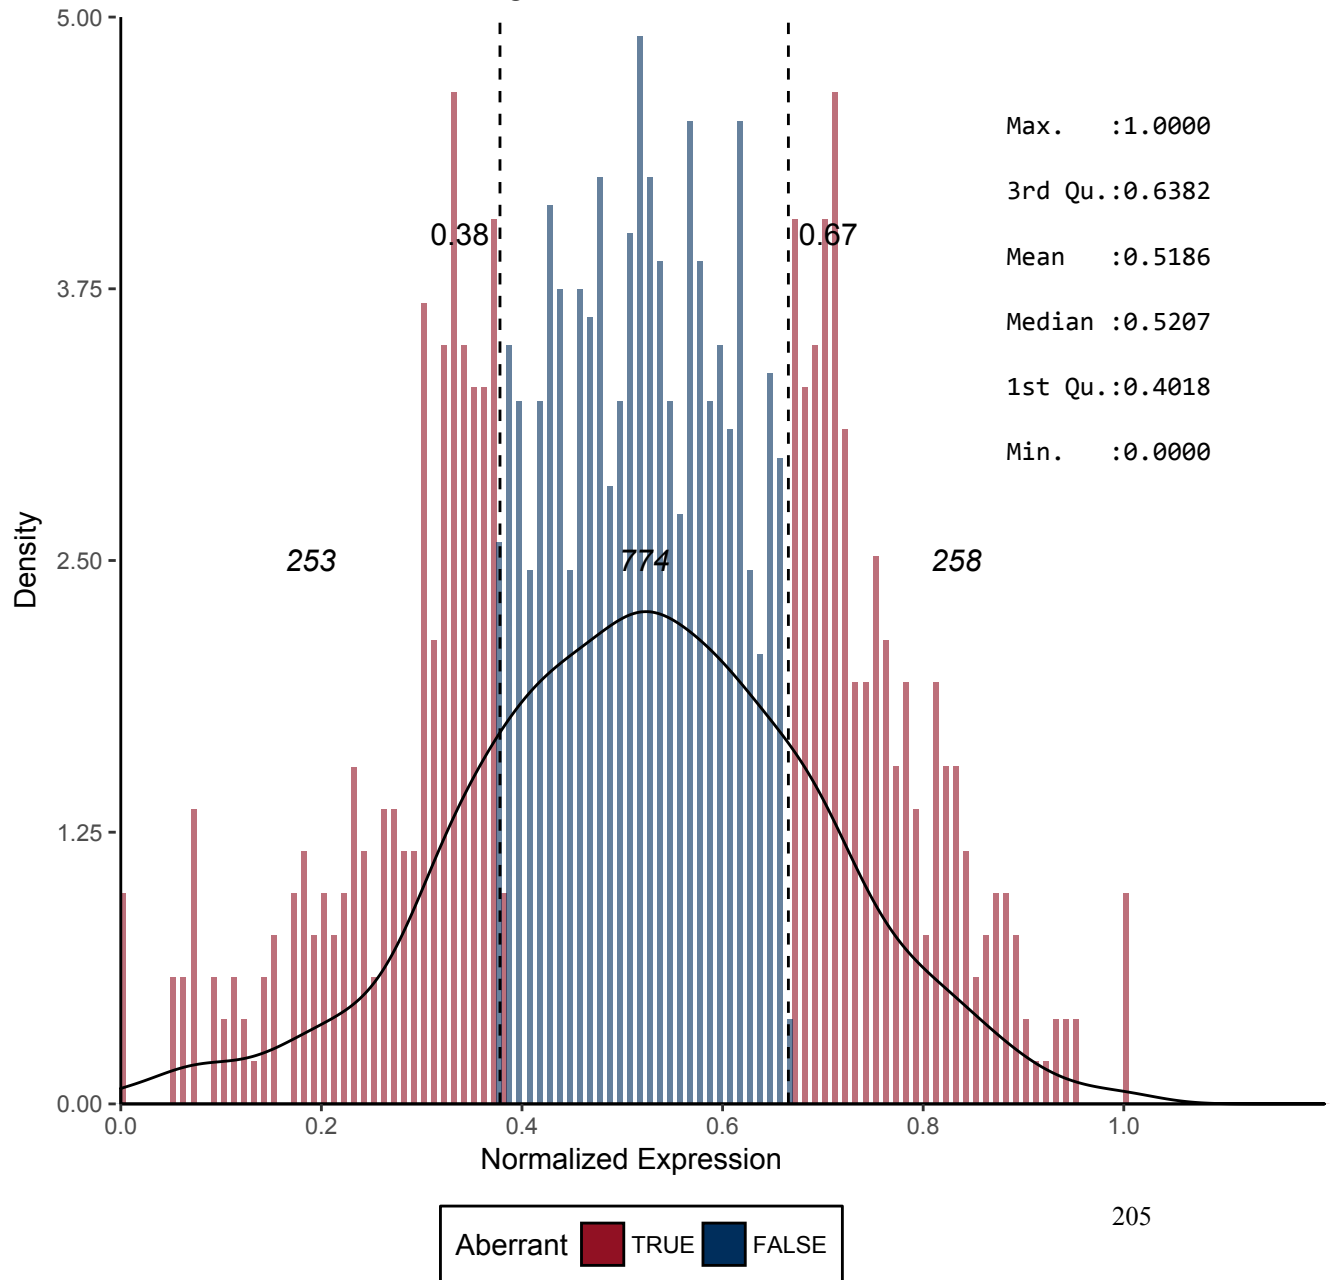

Figure 189 - CD171\*

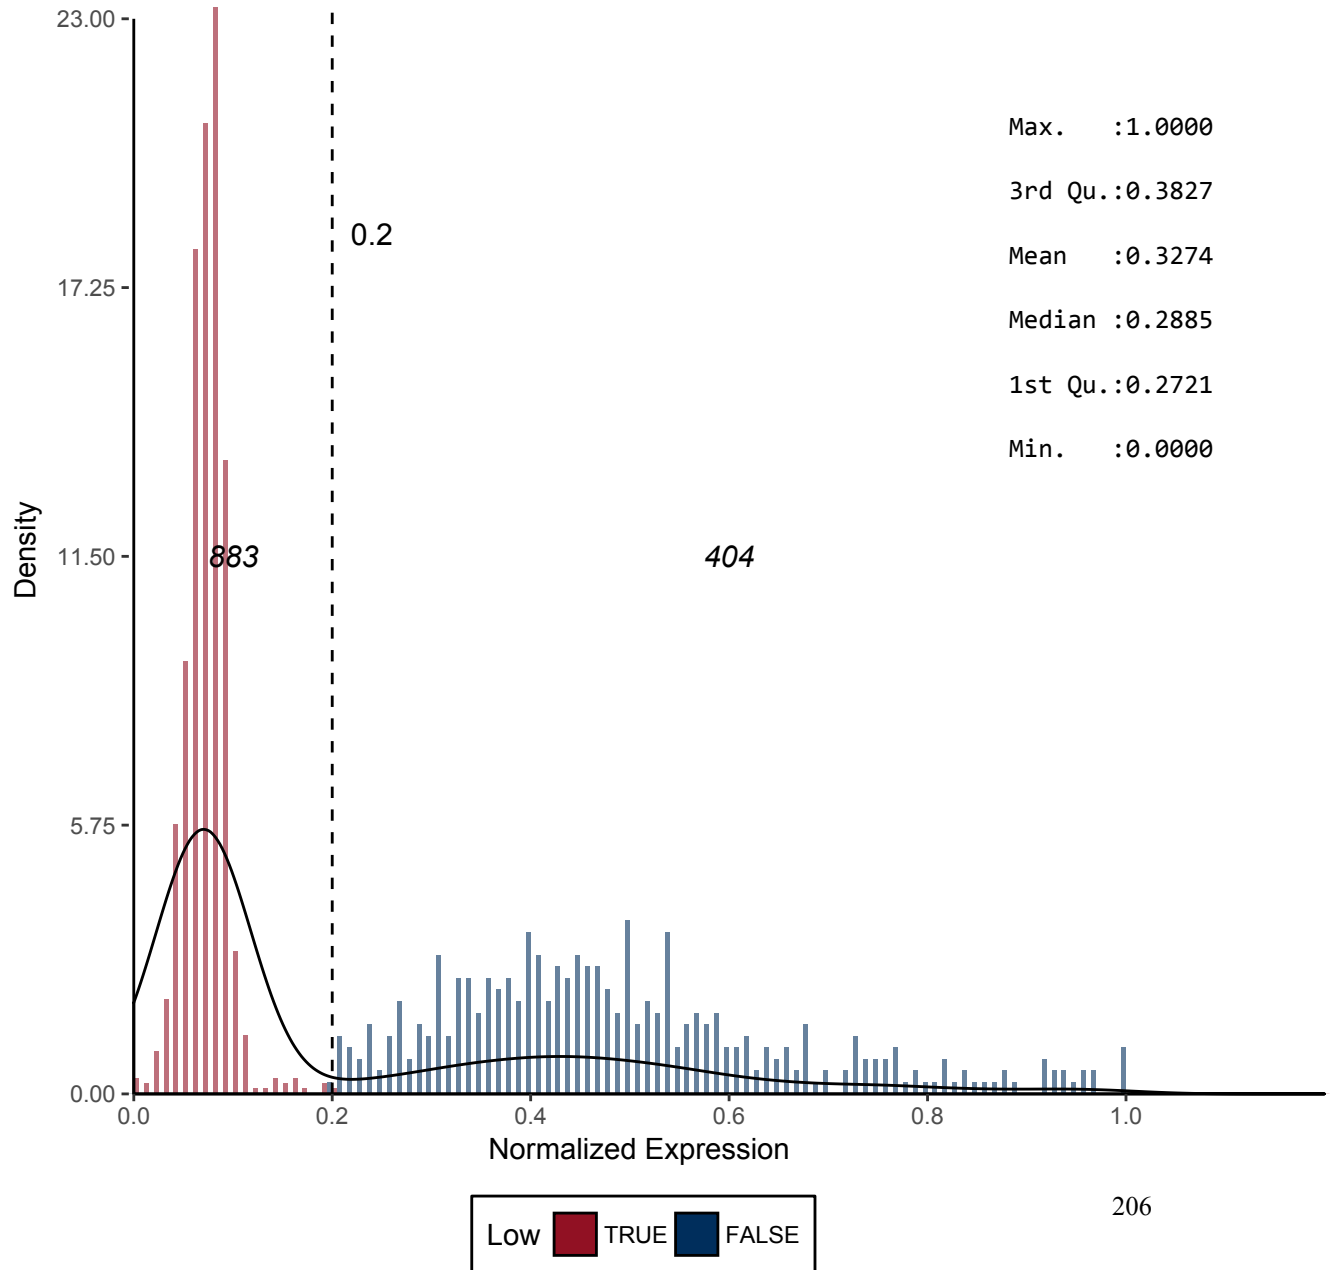

Figure 190 - CD172A

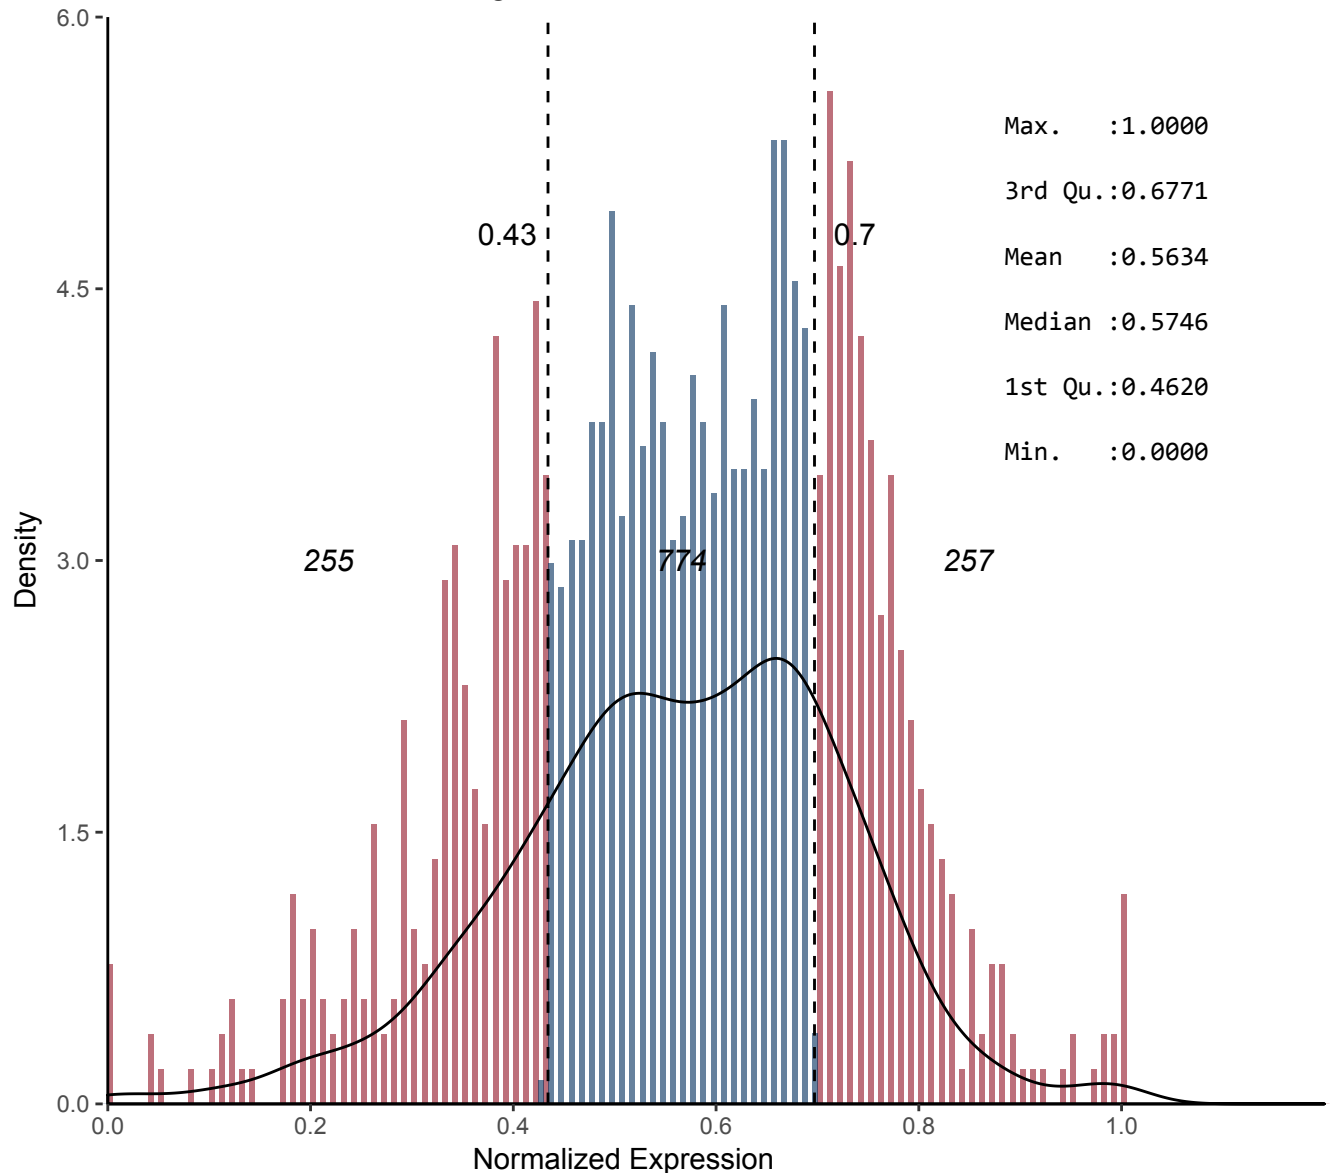

Aberrant TRUE FALSE

Figure 191 - CD172G

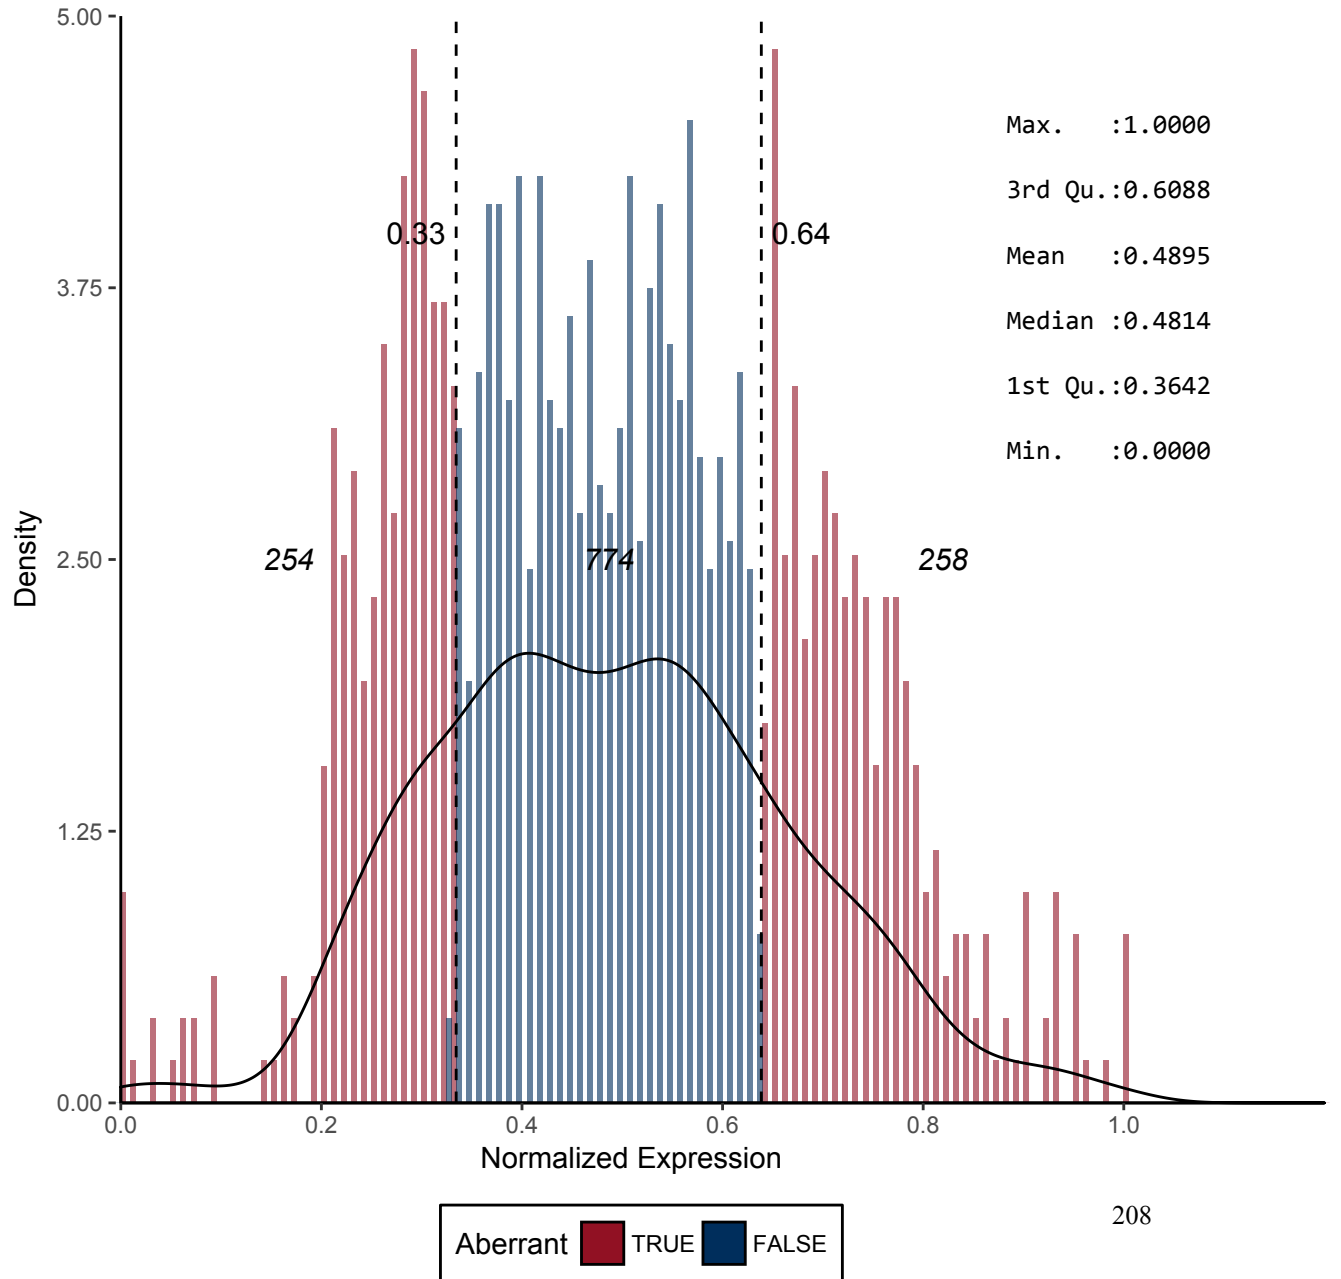



Figure 192 - CD174\*

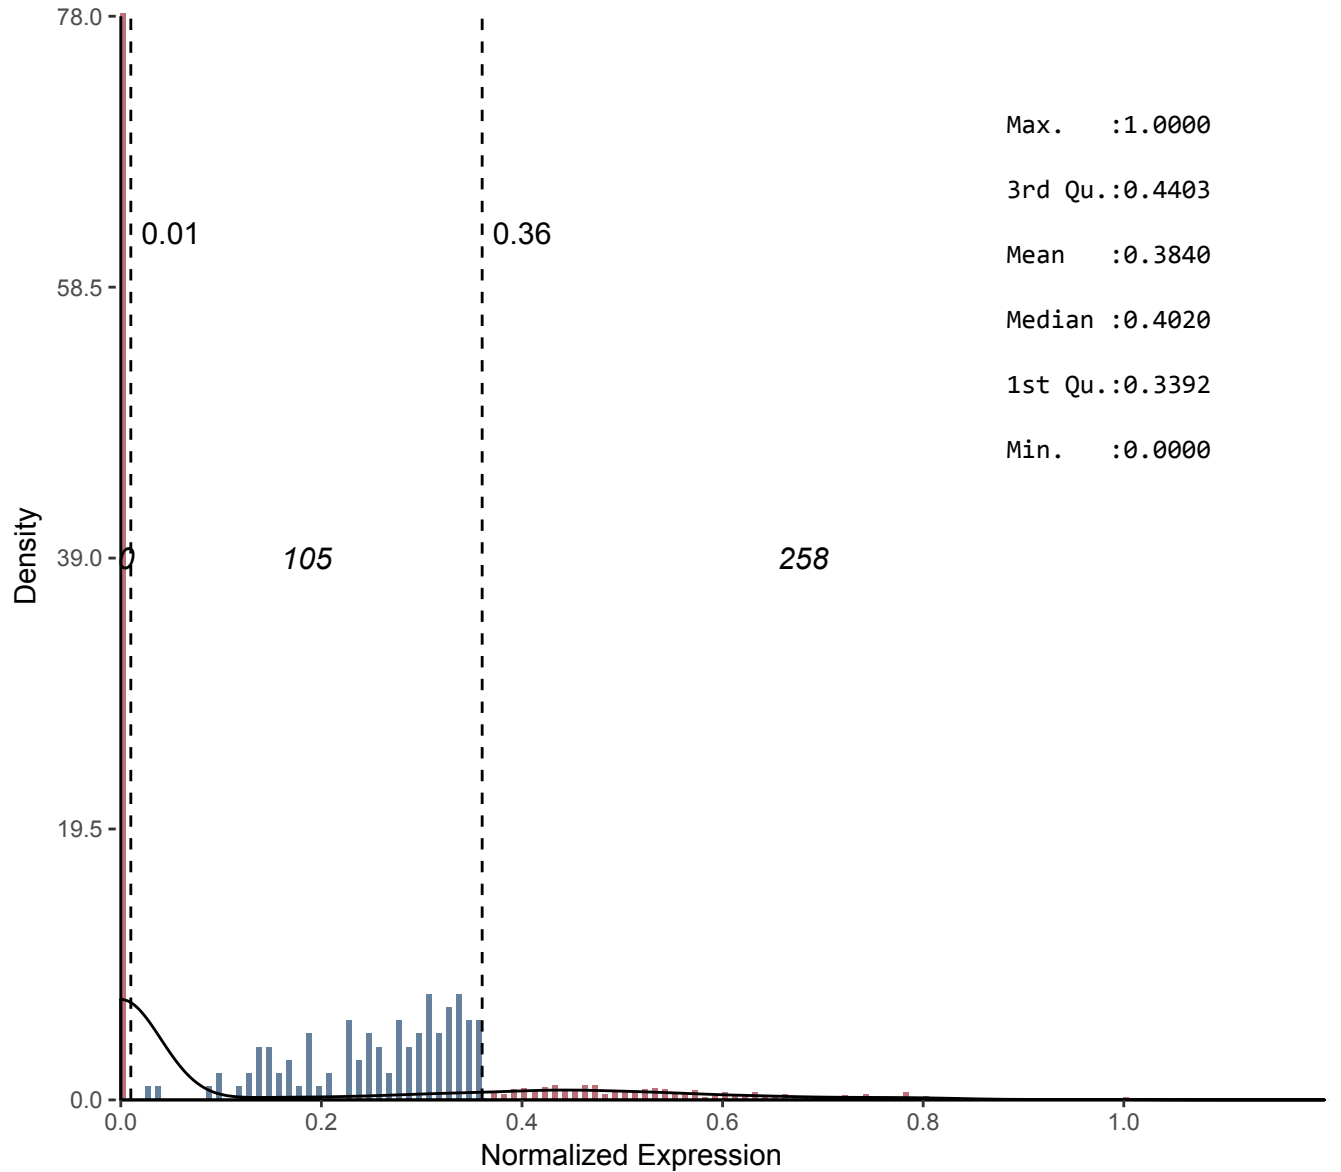

Aberrant TRUE FALSE

Figure 193 - CD177

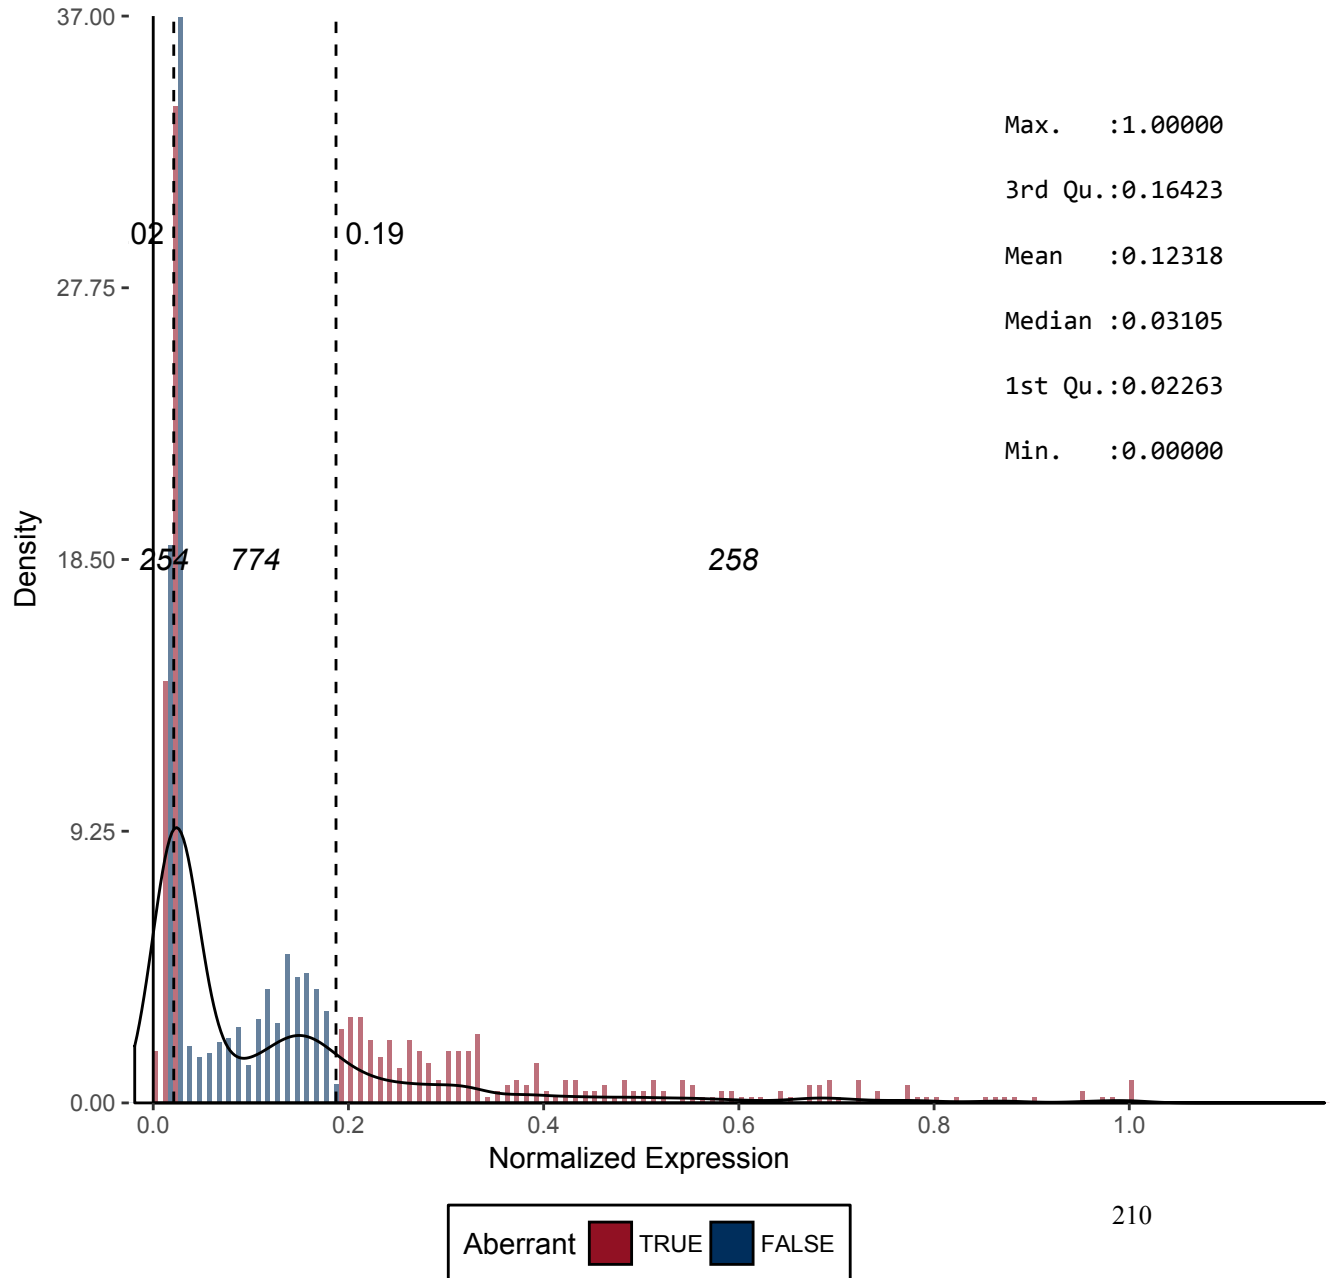

Figure 194 - CD178

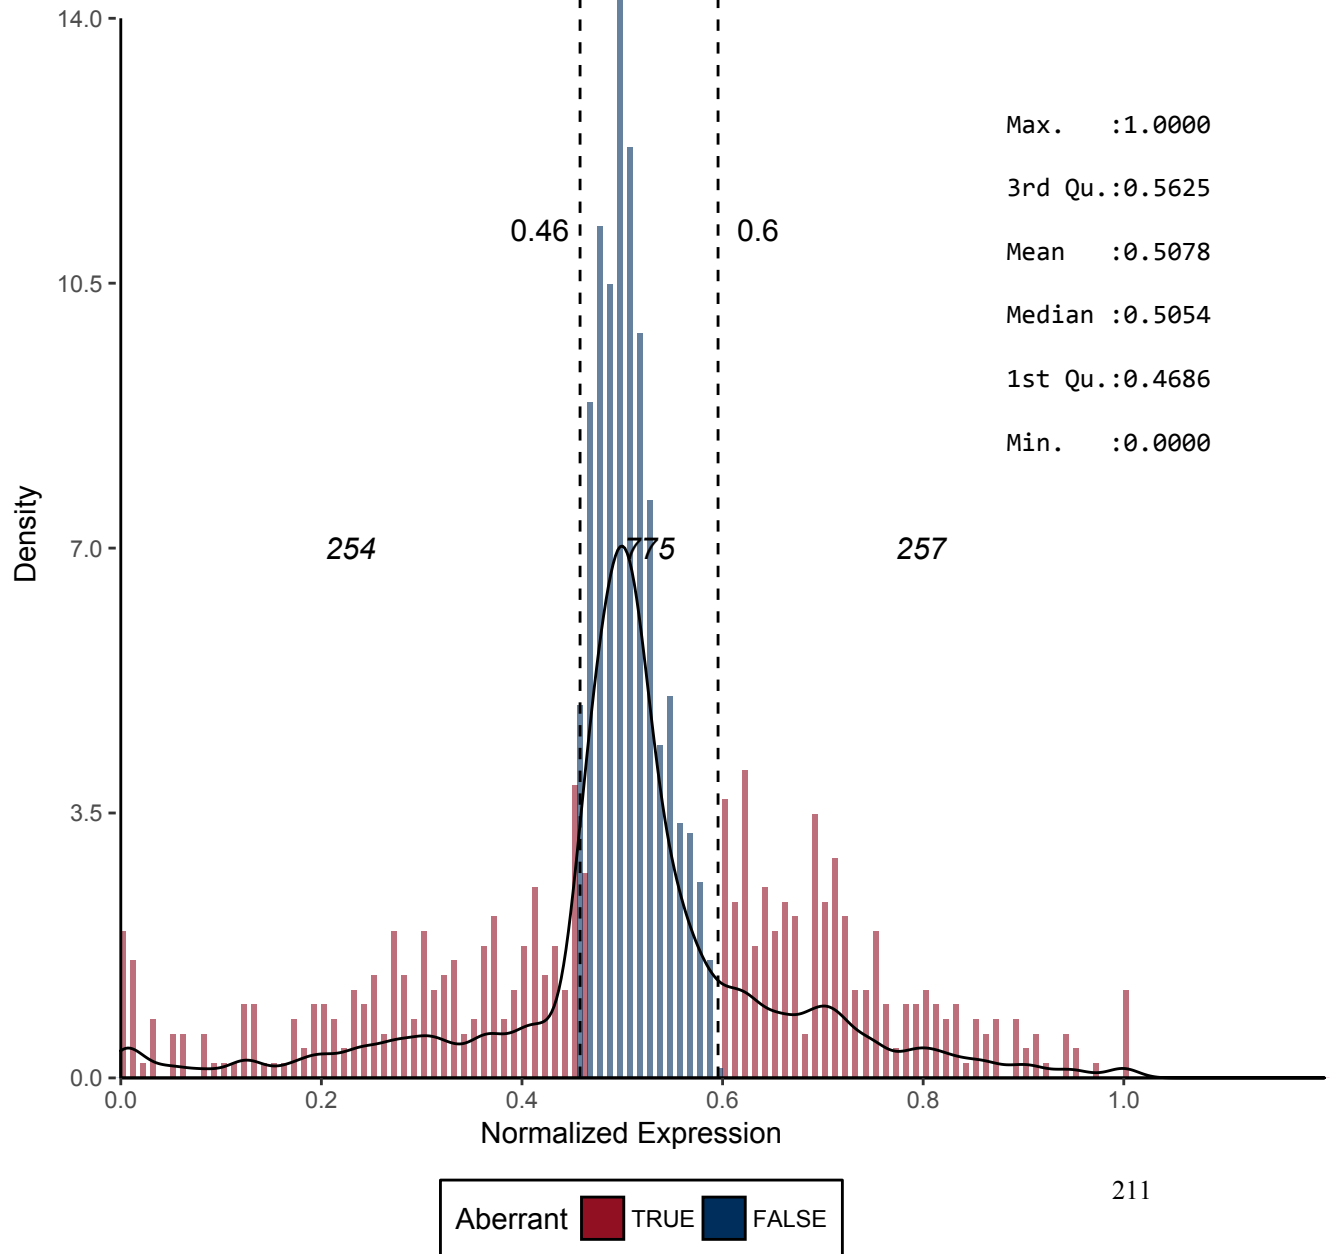

Figure 195 - CD179A\*

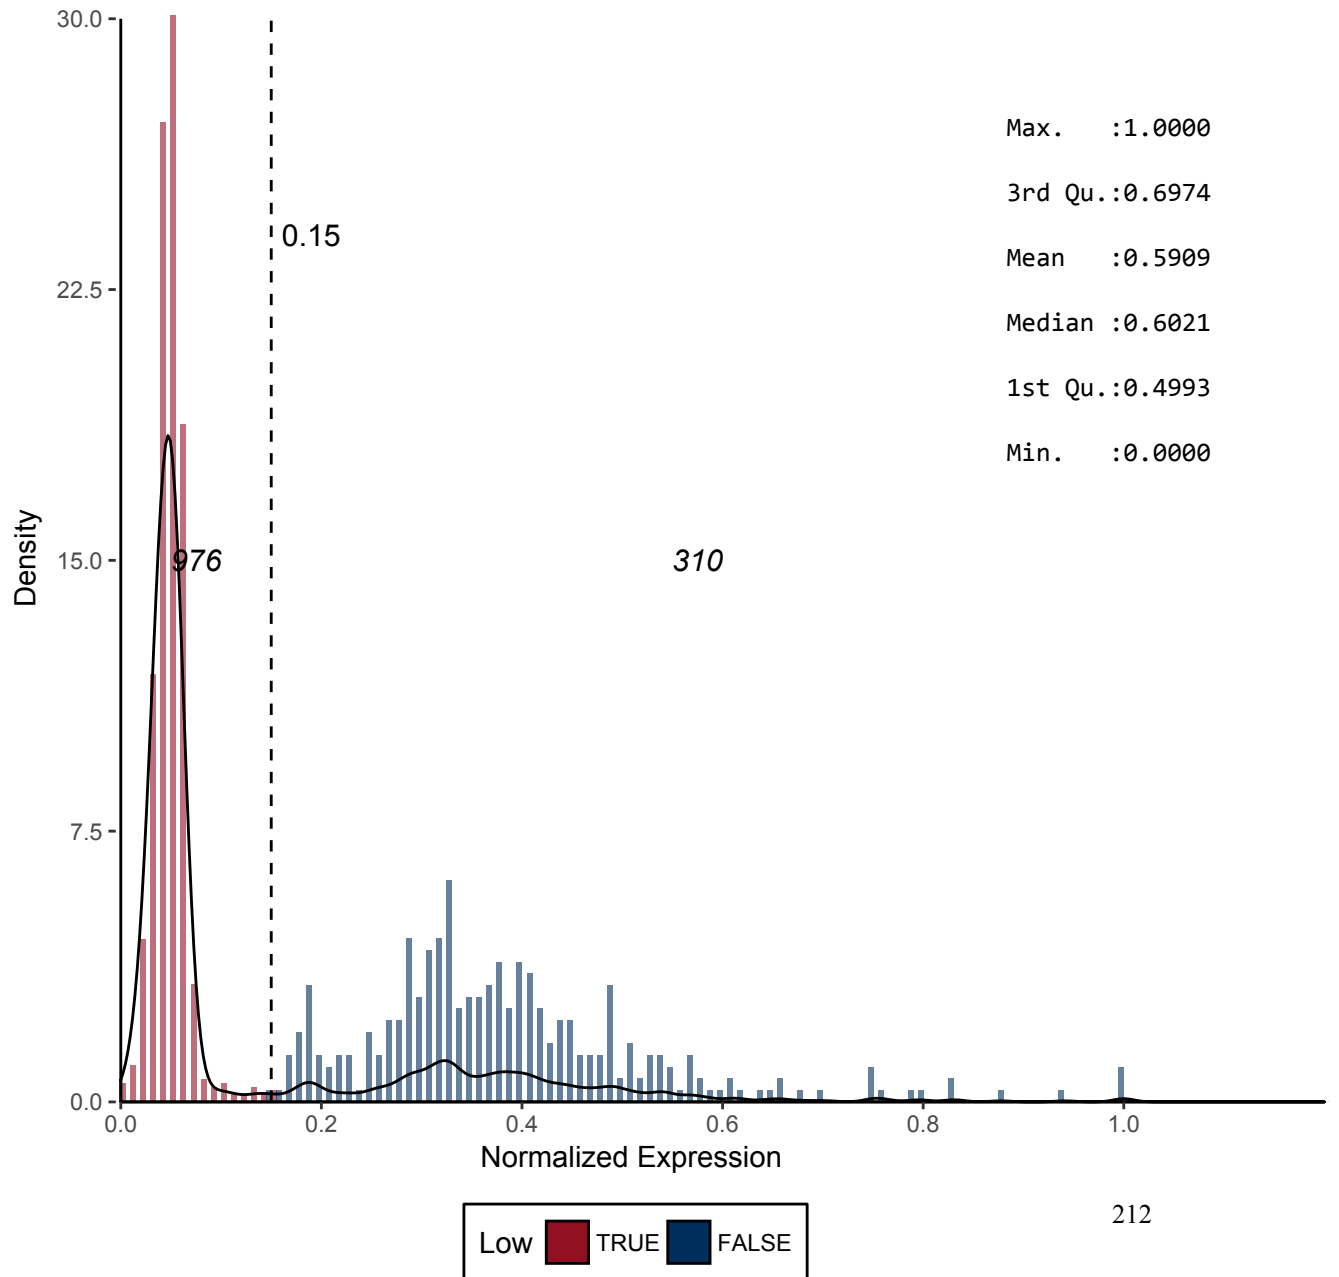

Figure 196 - CD179B

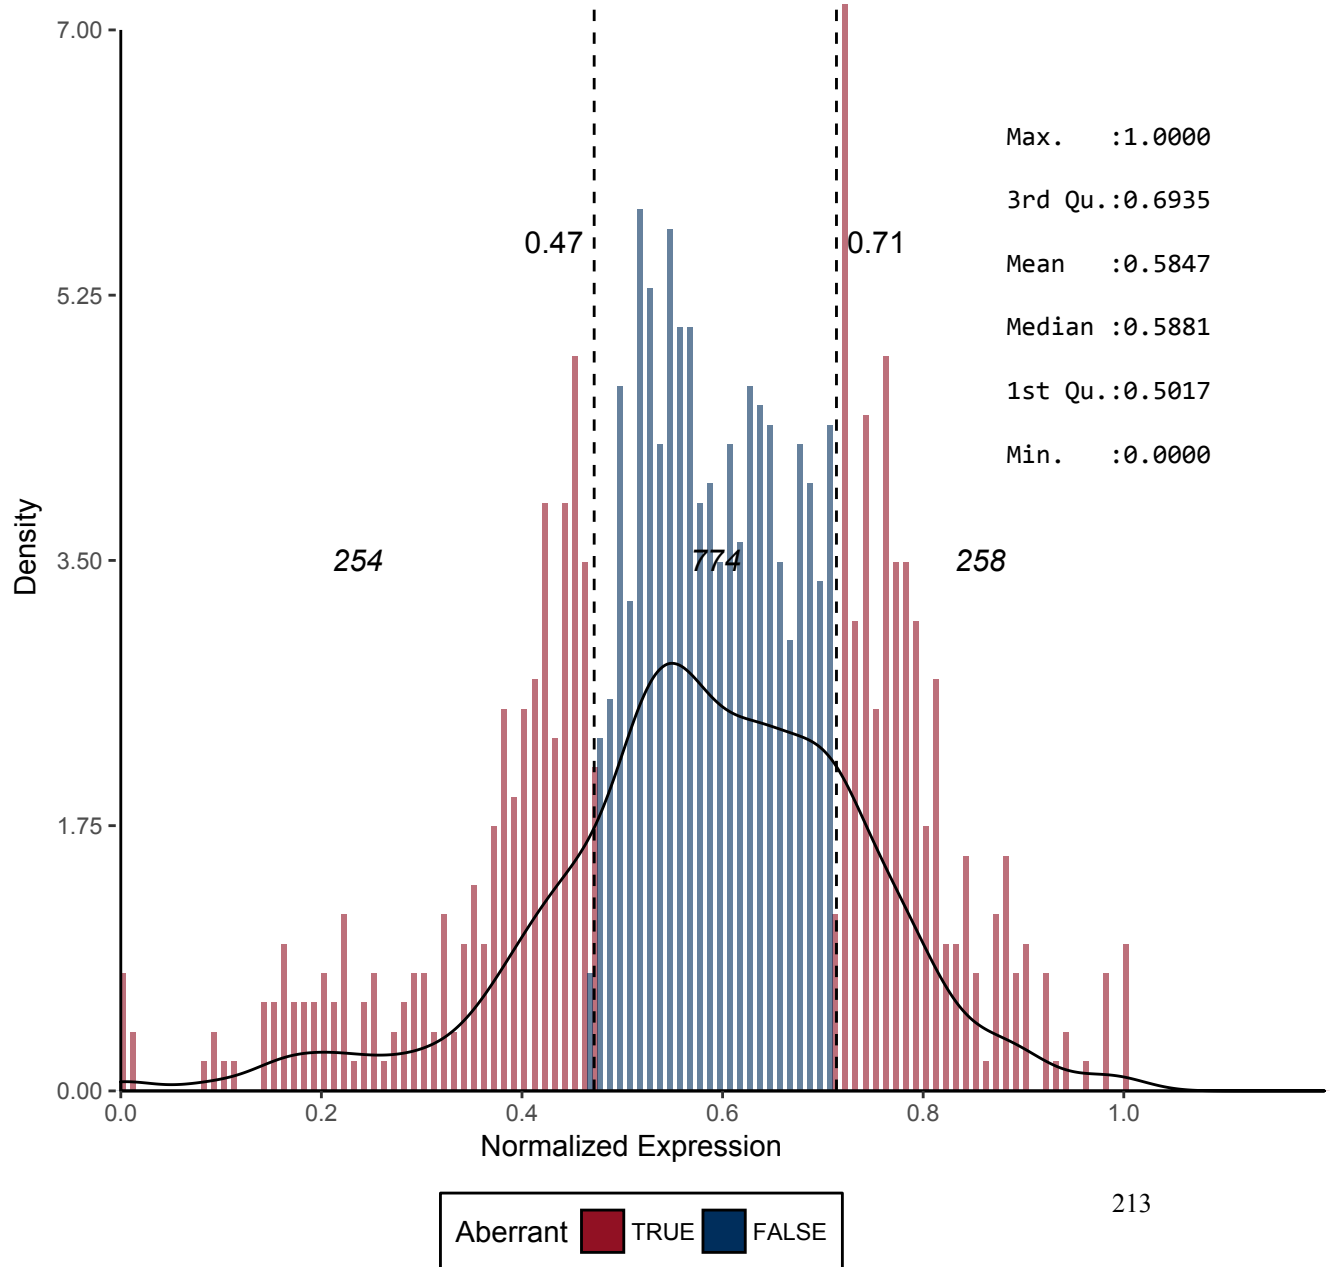

Figure 197 - CD180\*

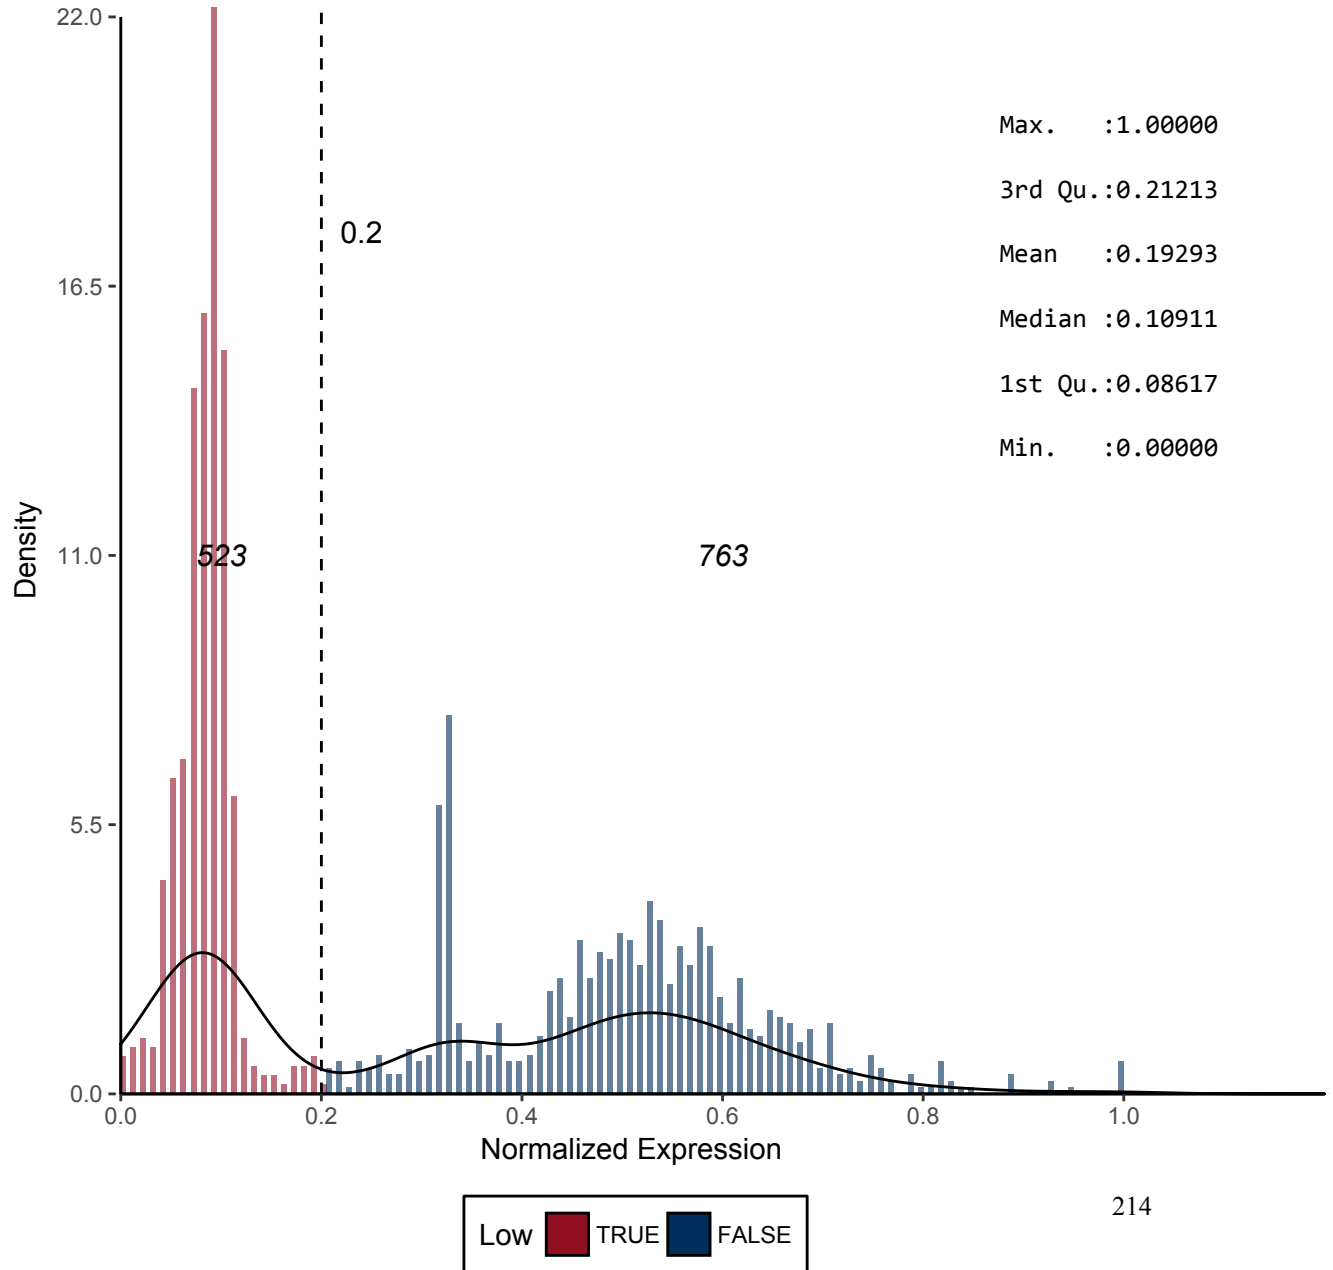

Figure 198 - CD181

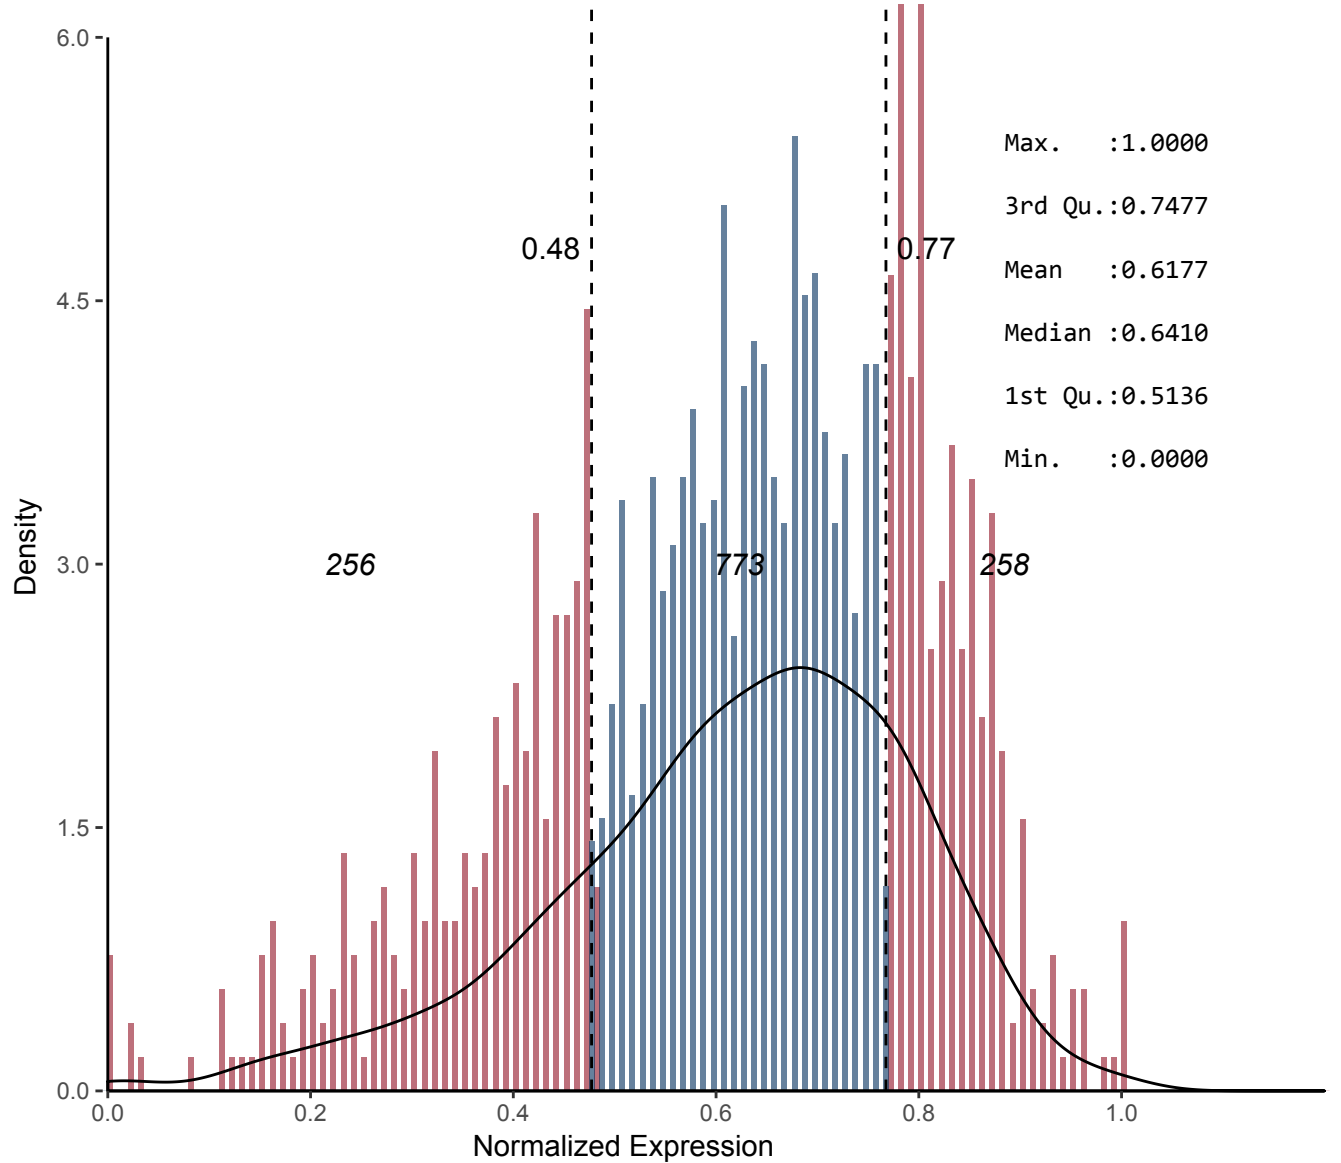

Aberrant TRUE FALSE

Figure 199 - CD182

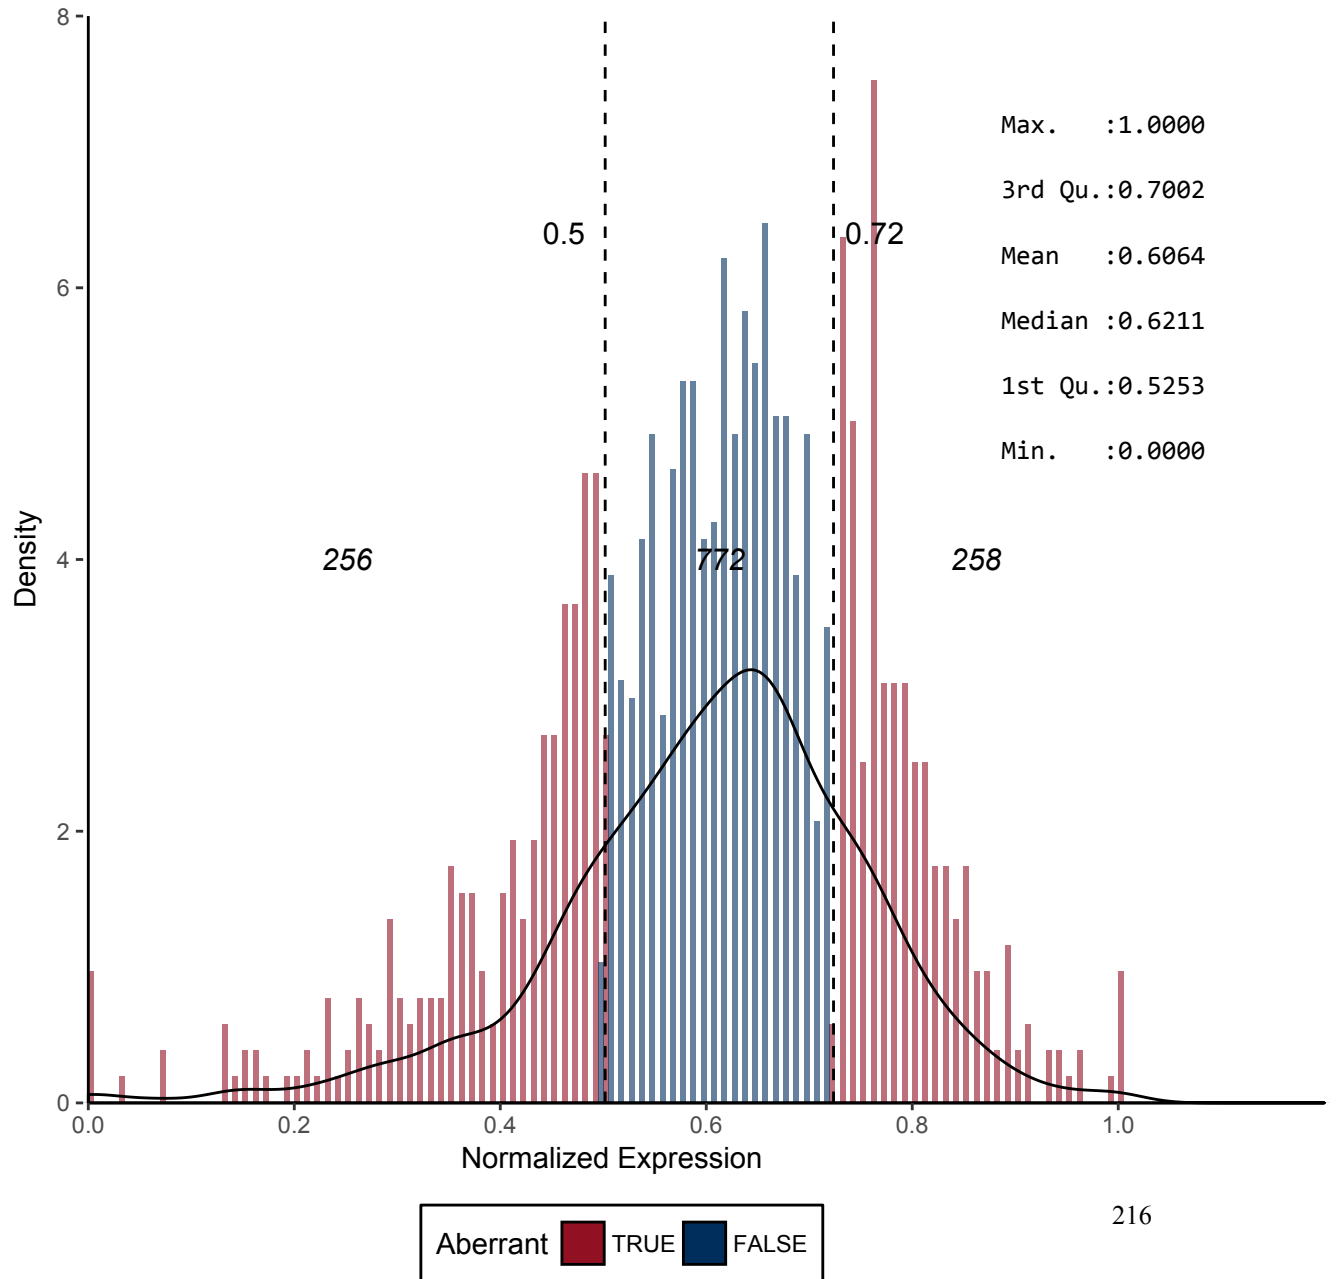



Figure 200 - CD183

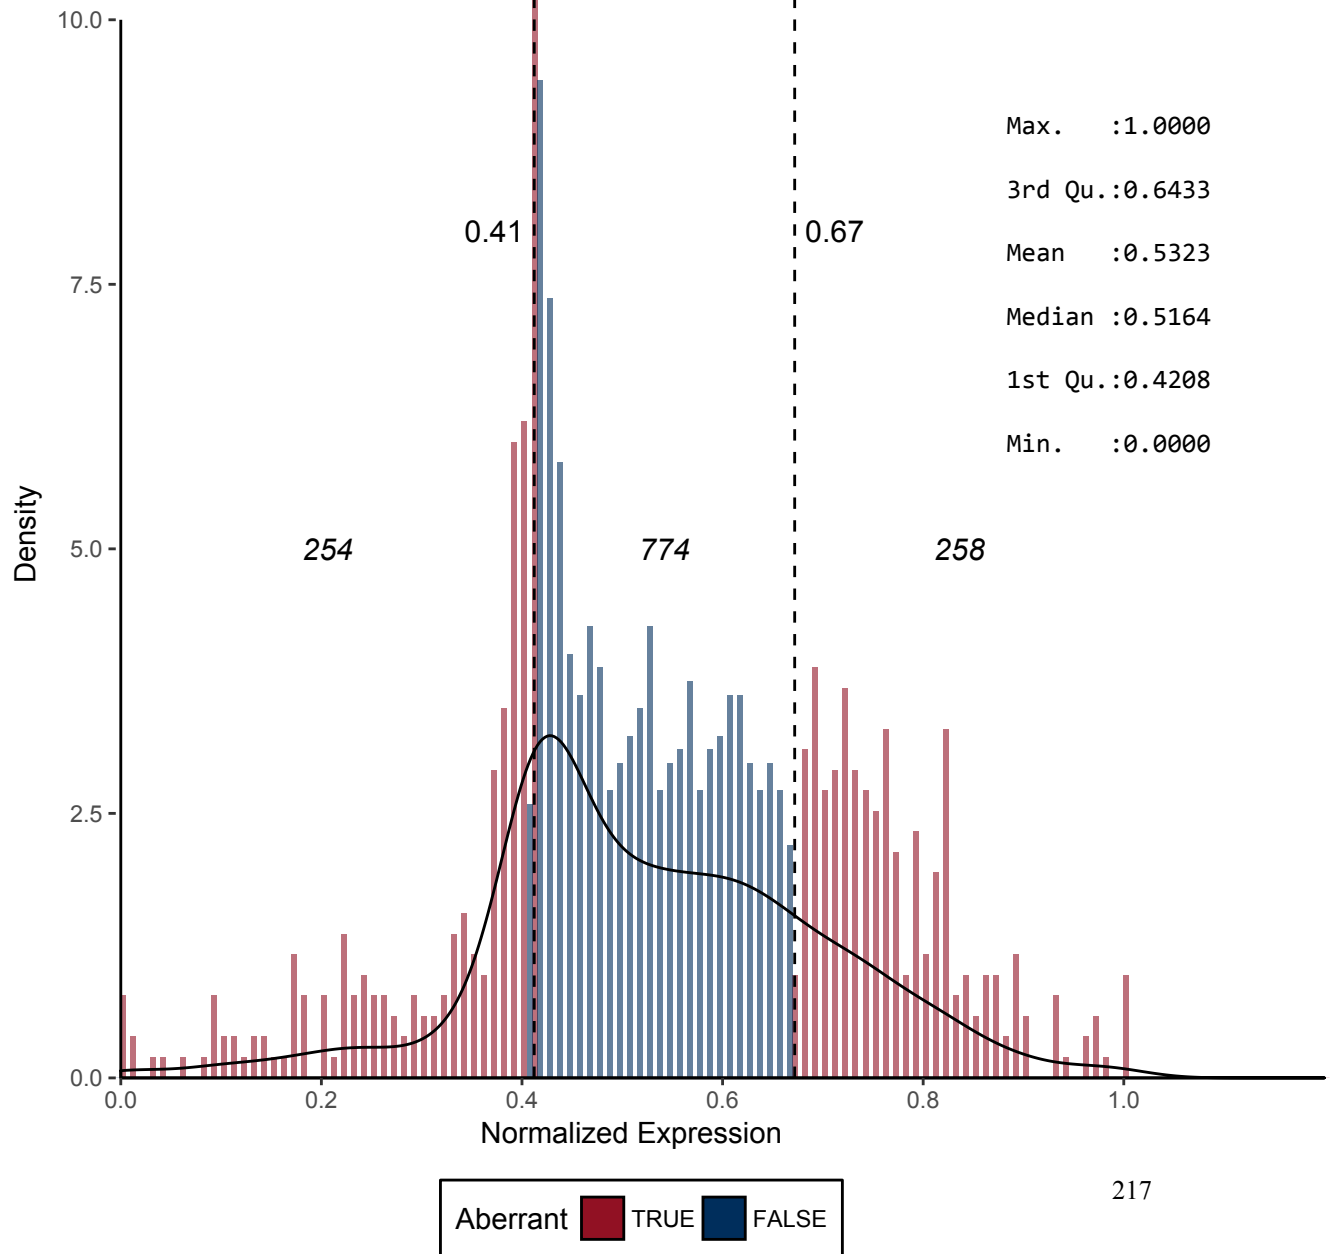

Figure 201 - CD184

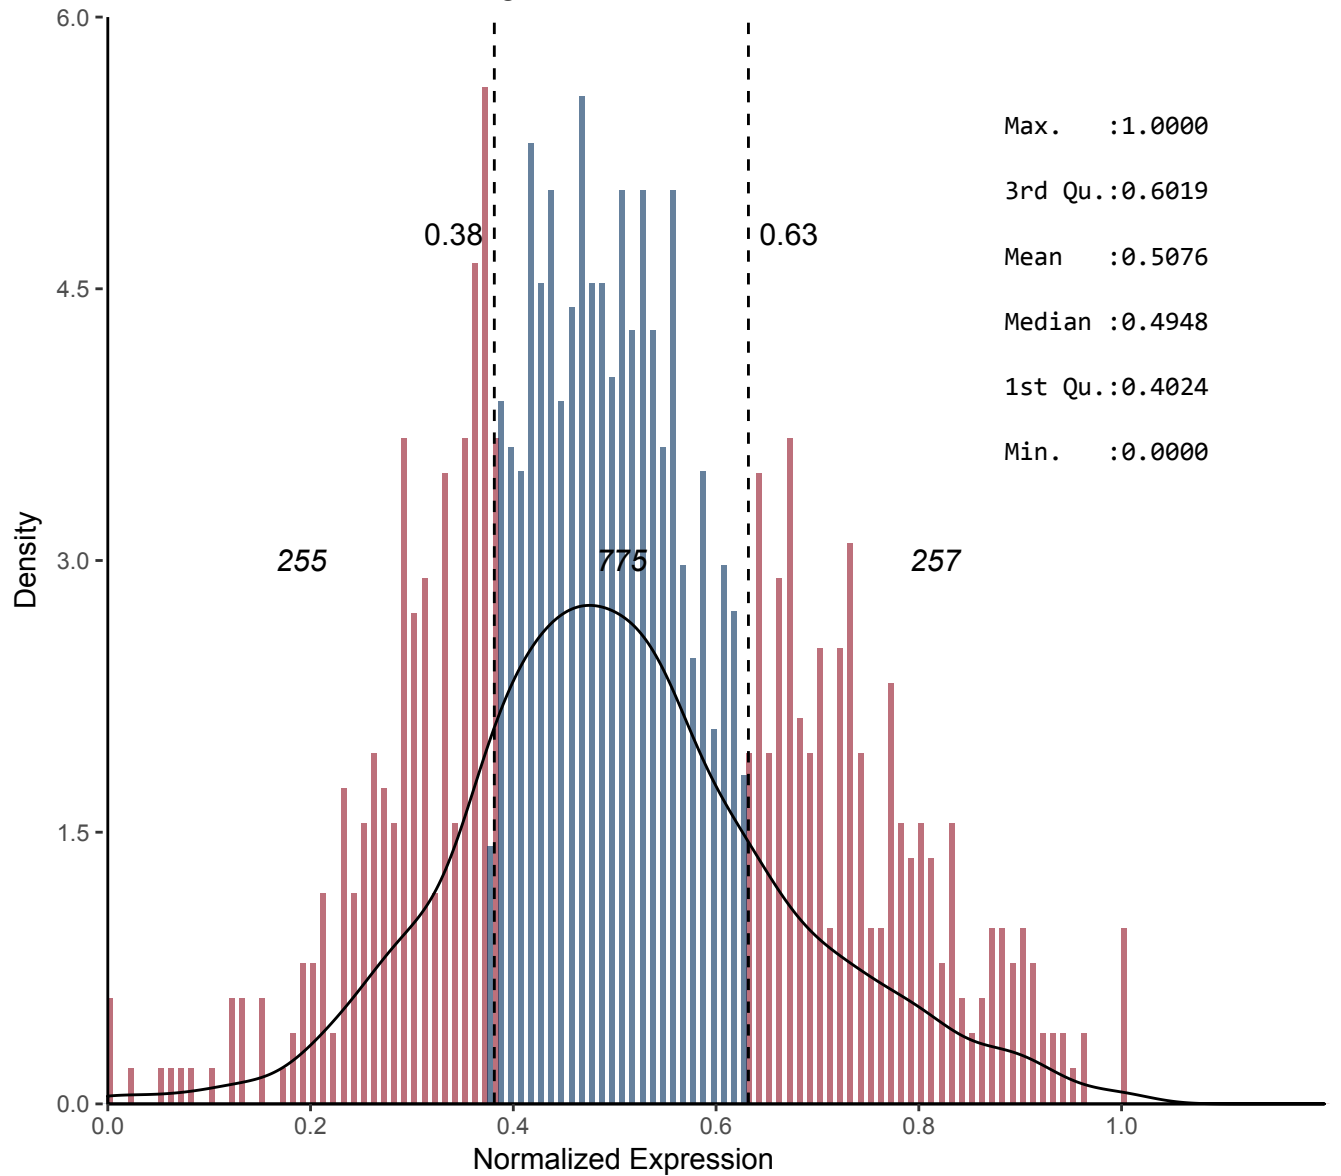

Aberrant TRUE FALSE

Figure 202 - CD185

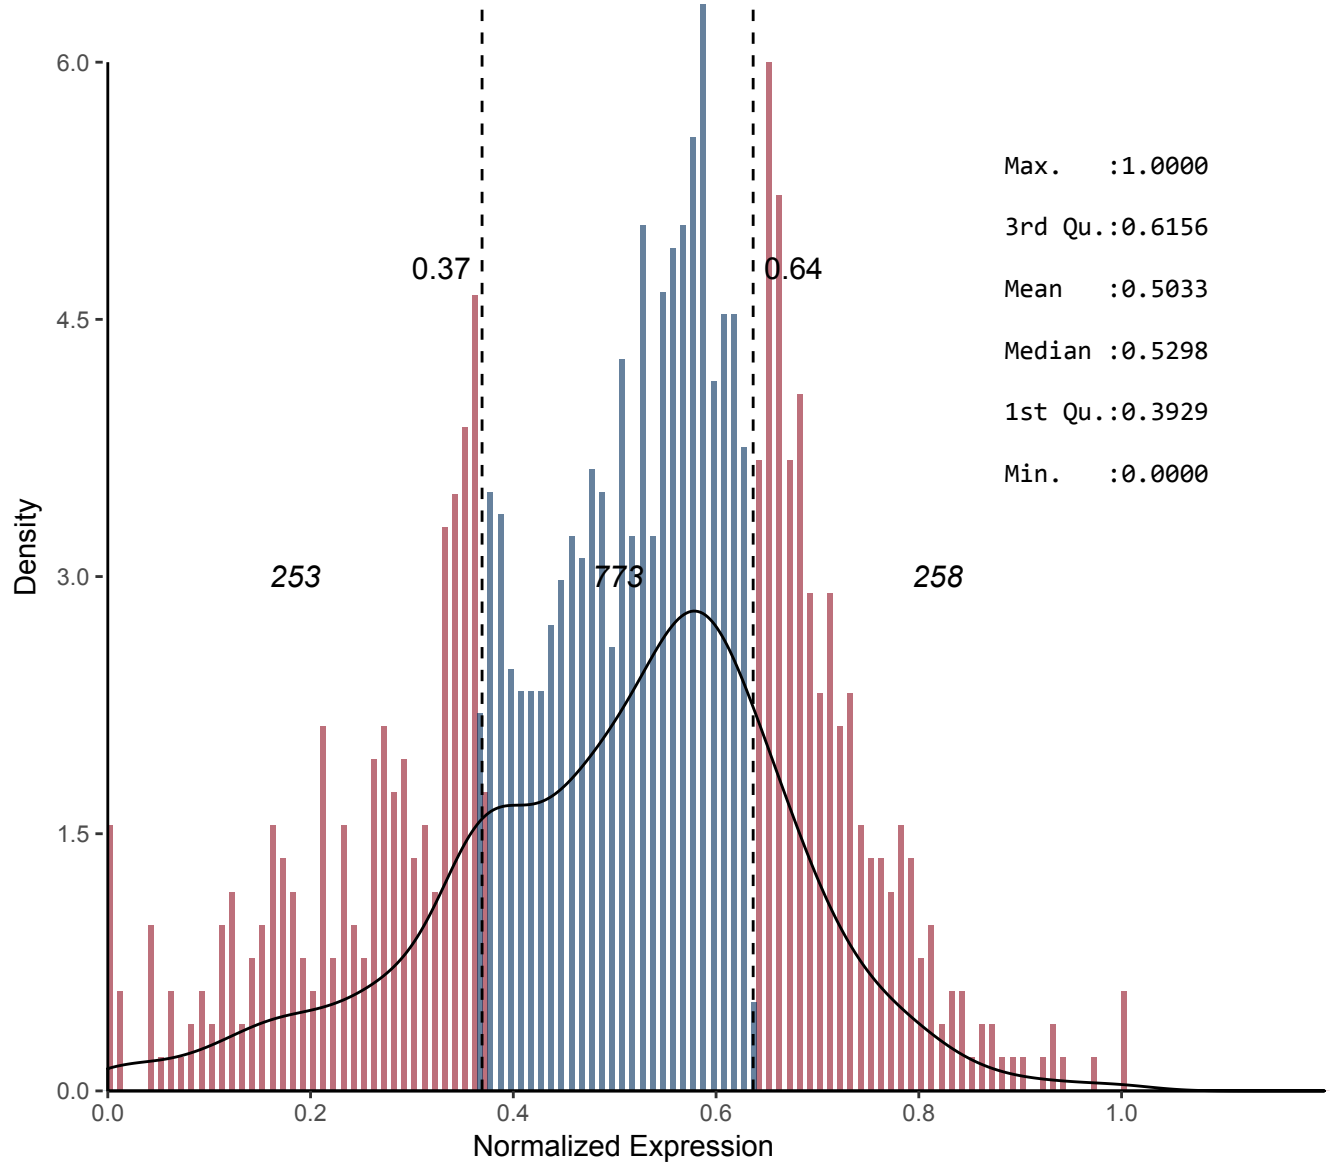

Aberrant TRUE FALSE

Figure 203 - CD186

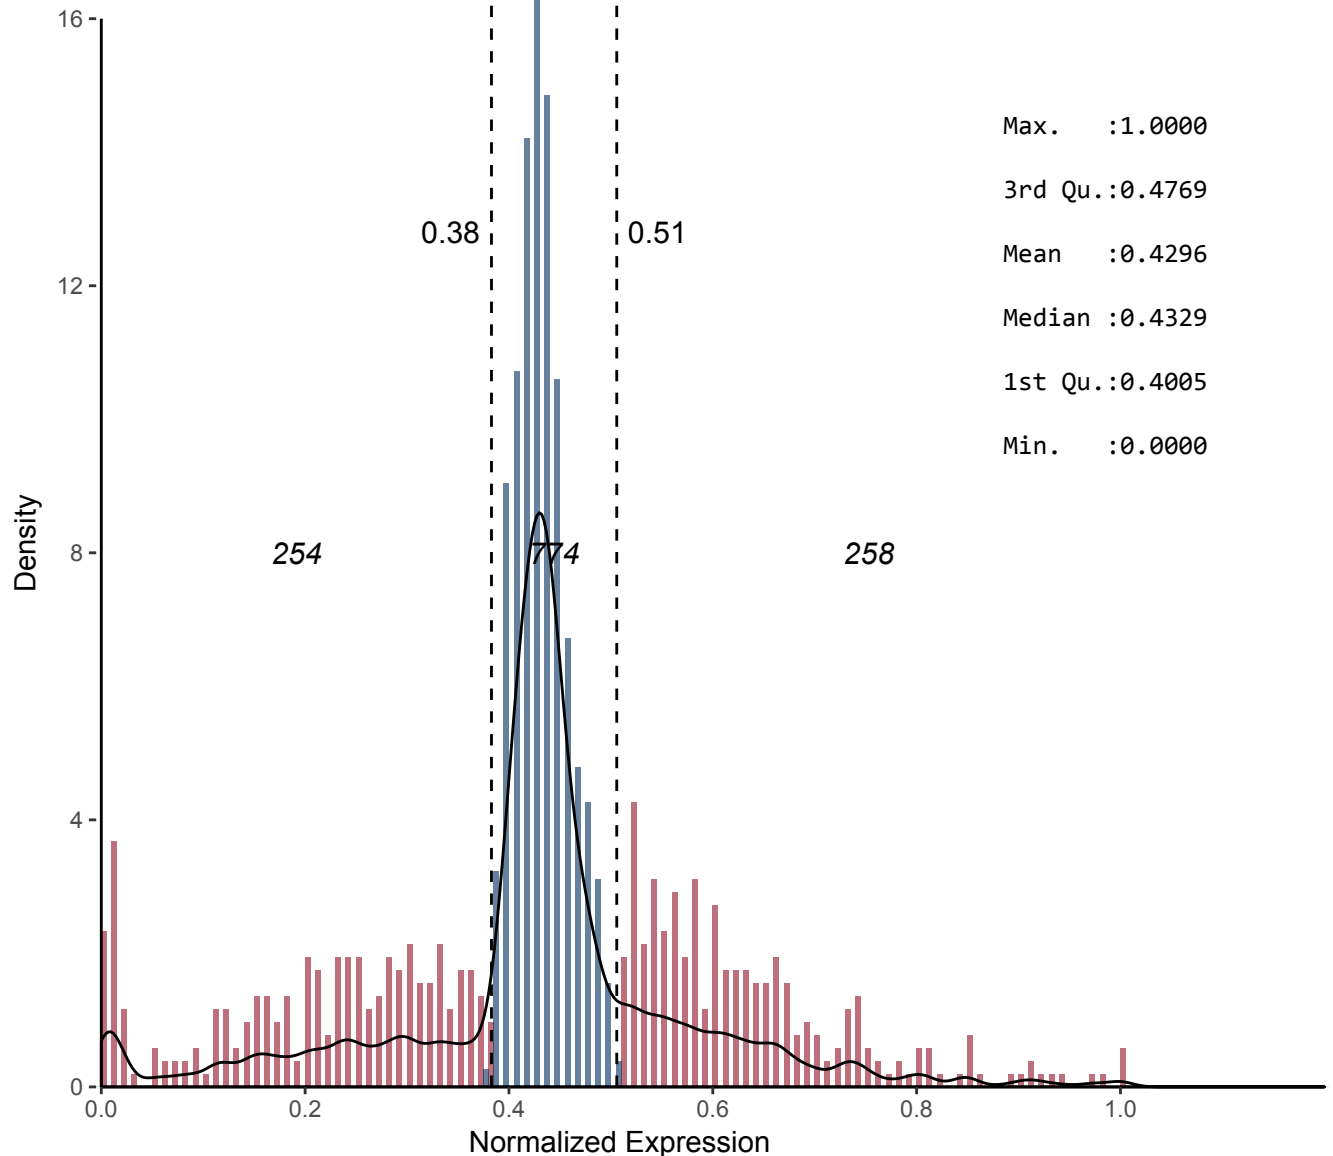

Aberrant TRUE FALSE

Figure 204 - CD191

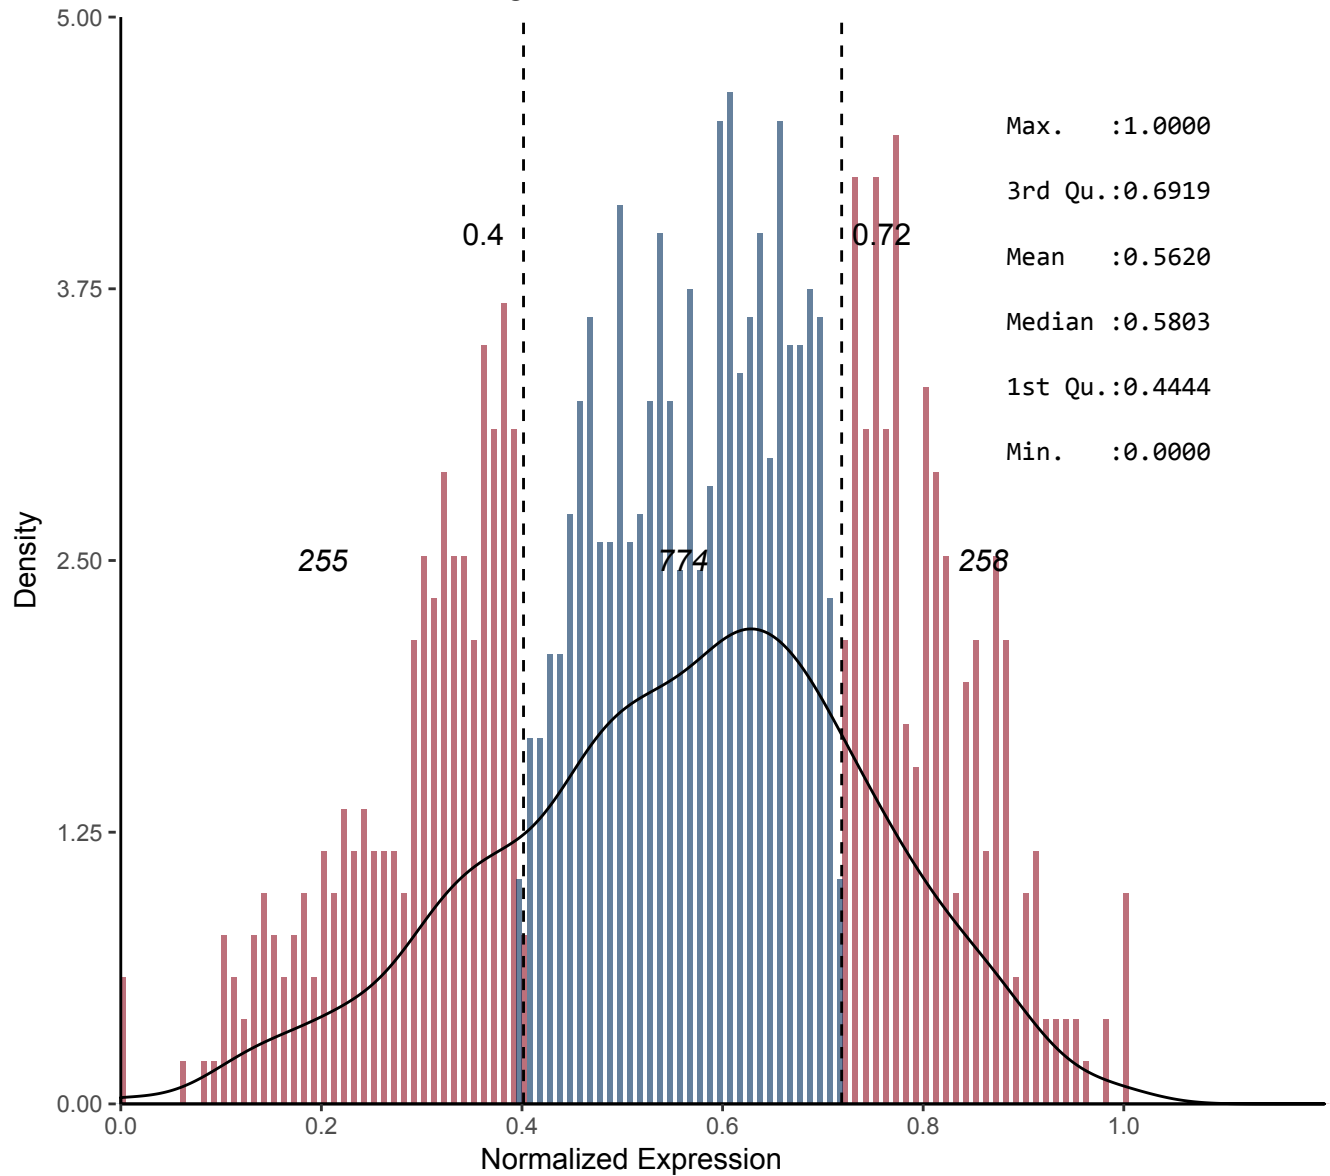

Aberrant TRUE FALSE

Figure 205 - CD193

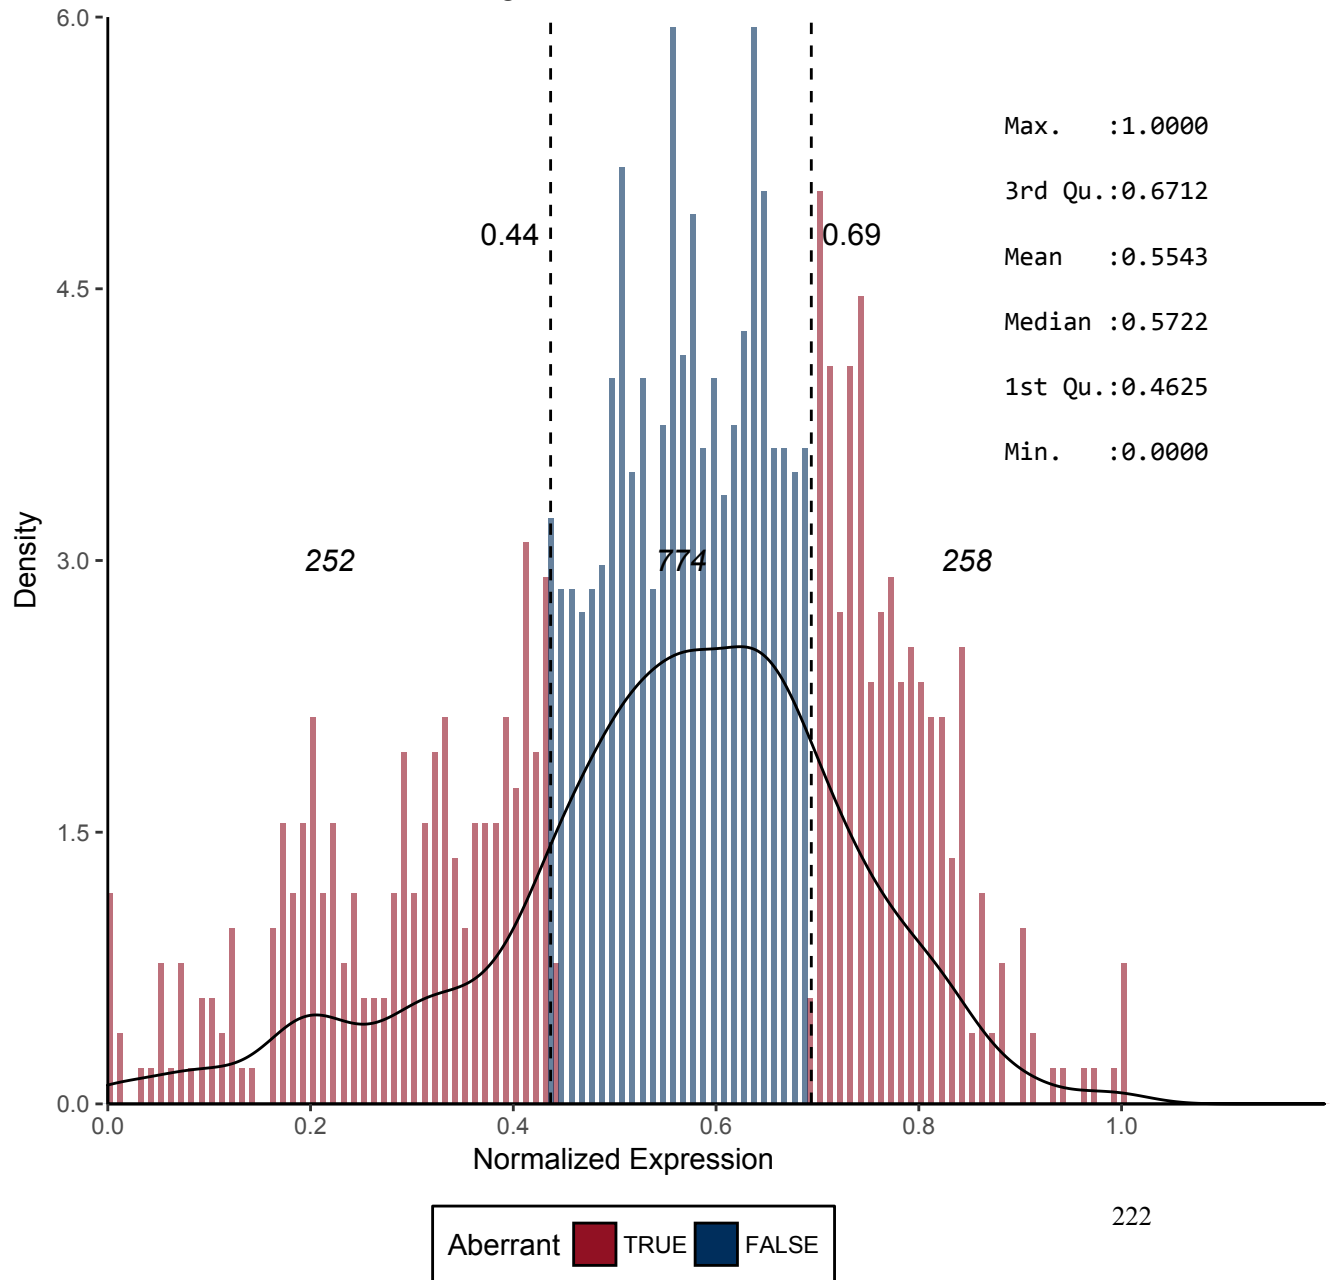

Figure 206 - CD194\*

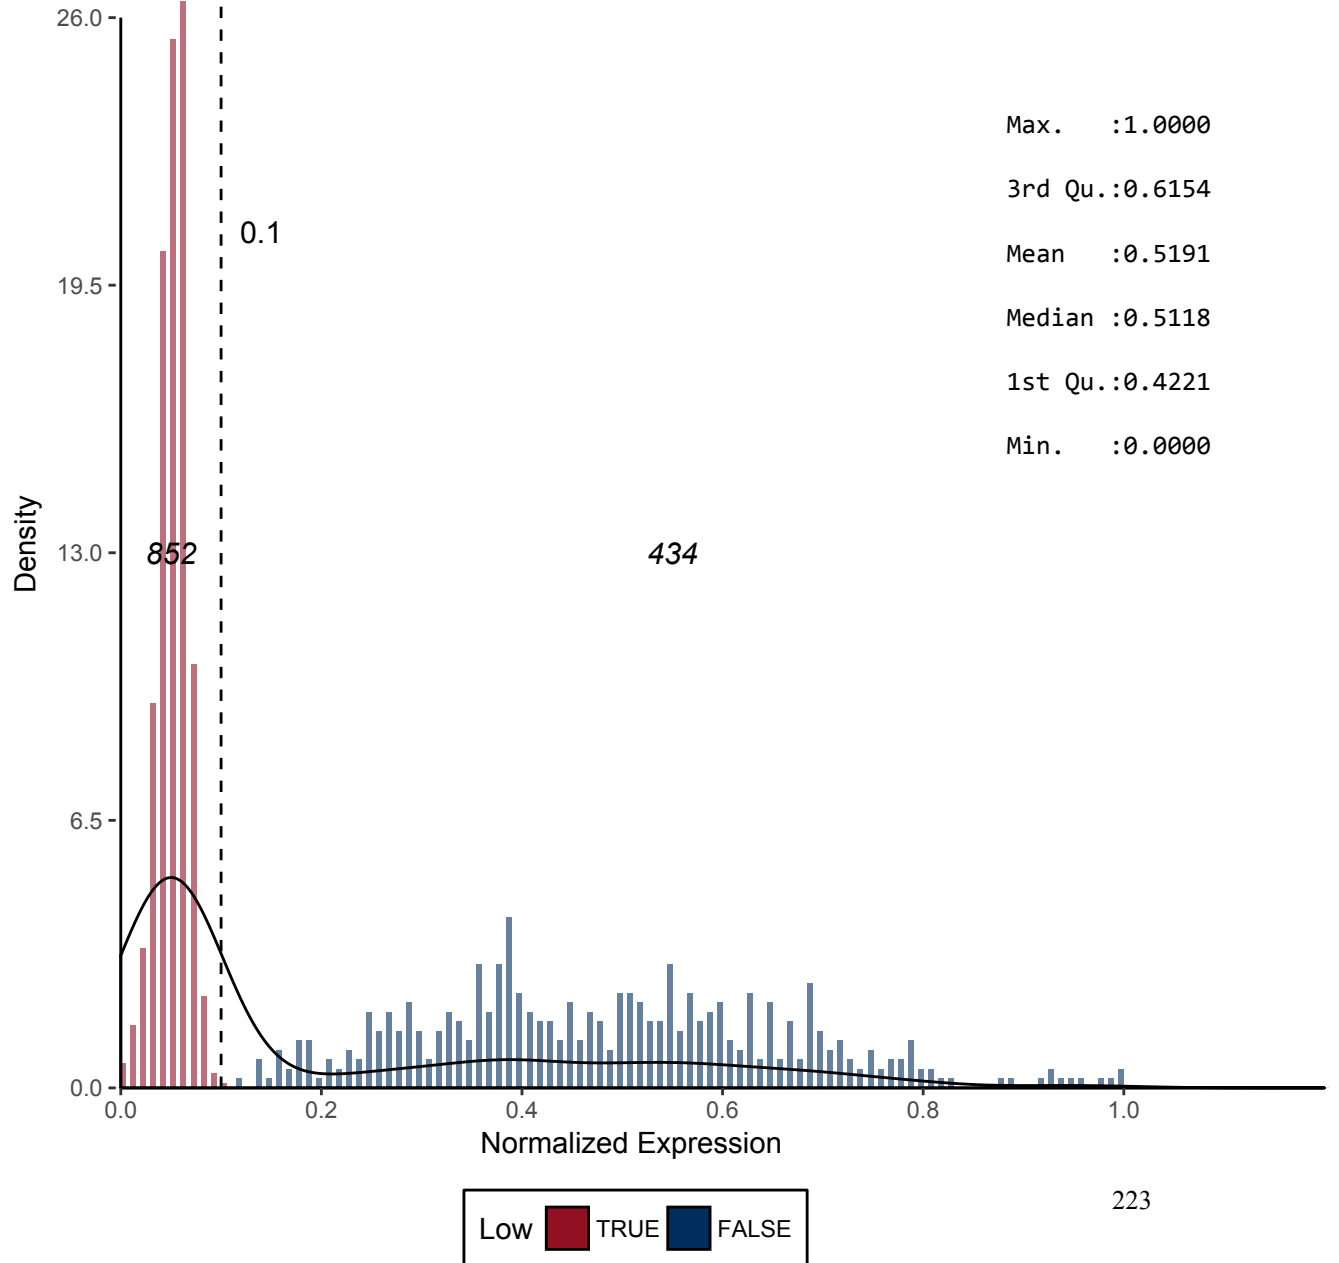

Figure 207 - CD195

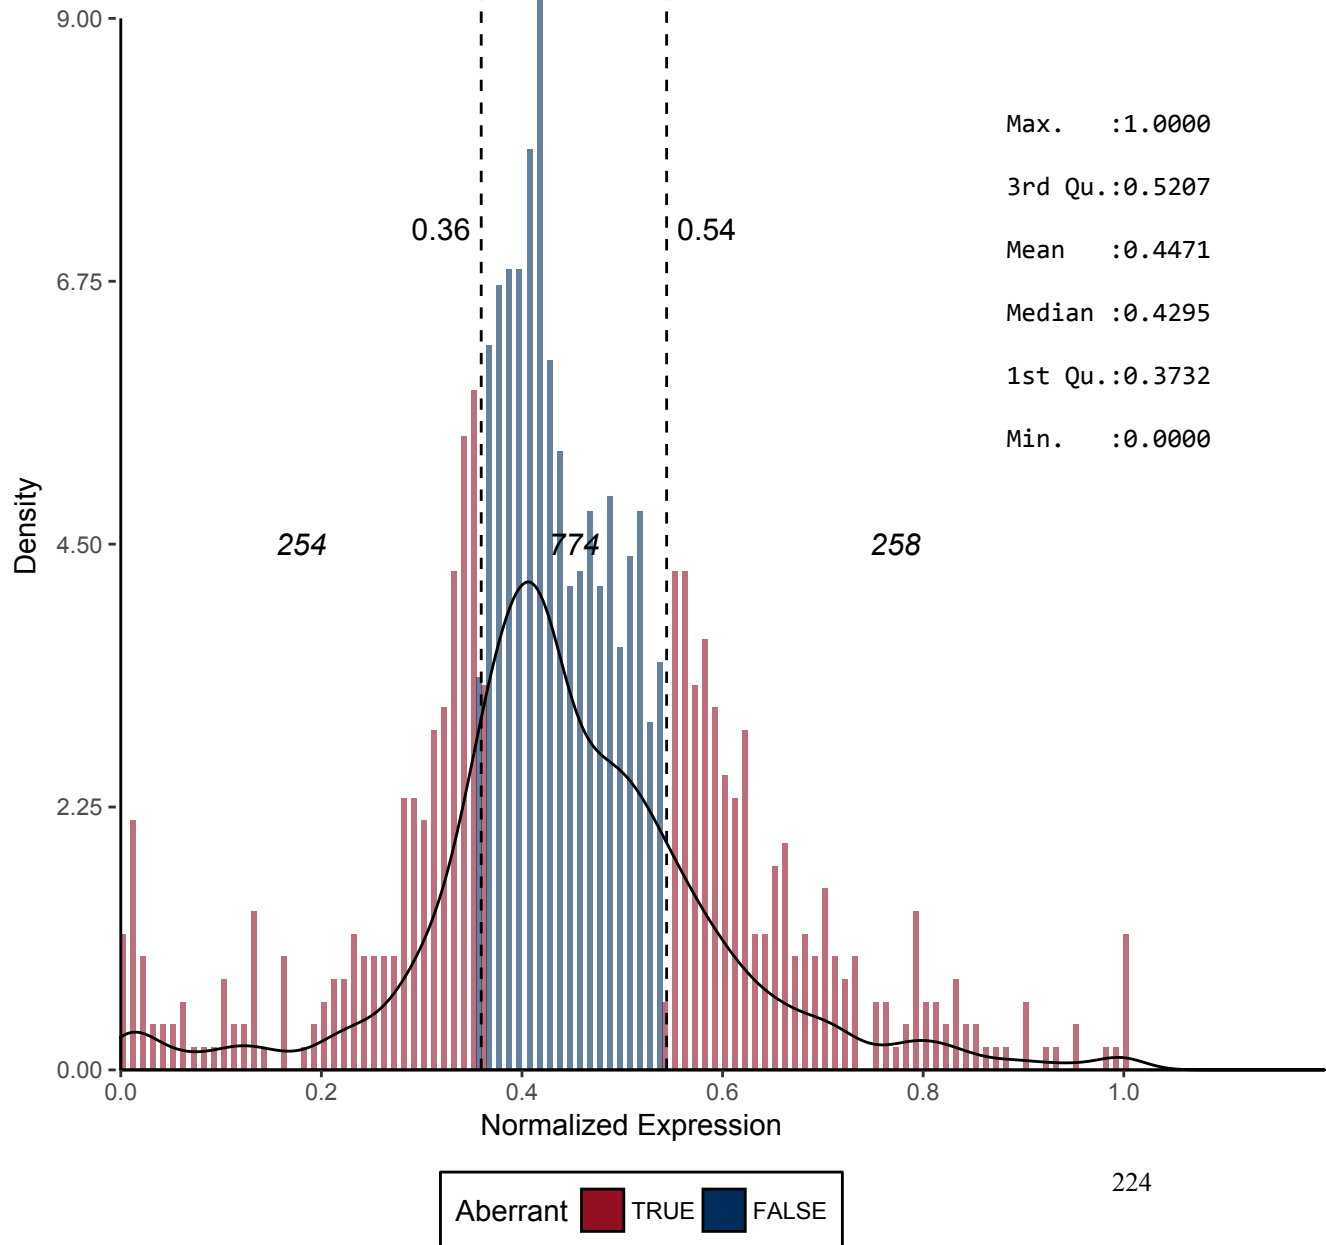



Figure 208 - CD196

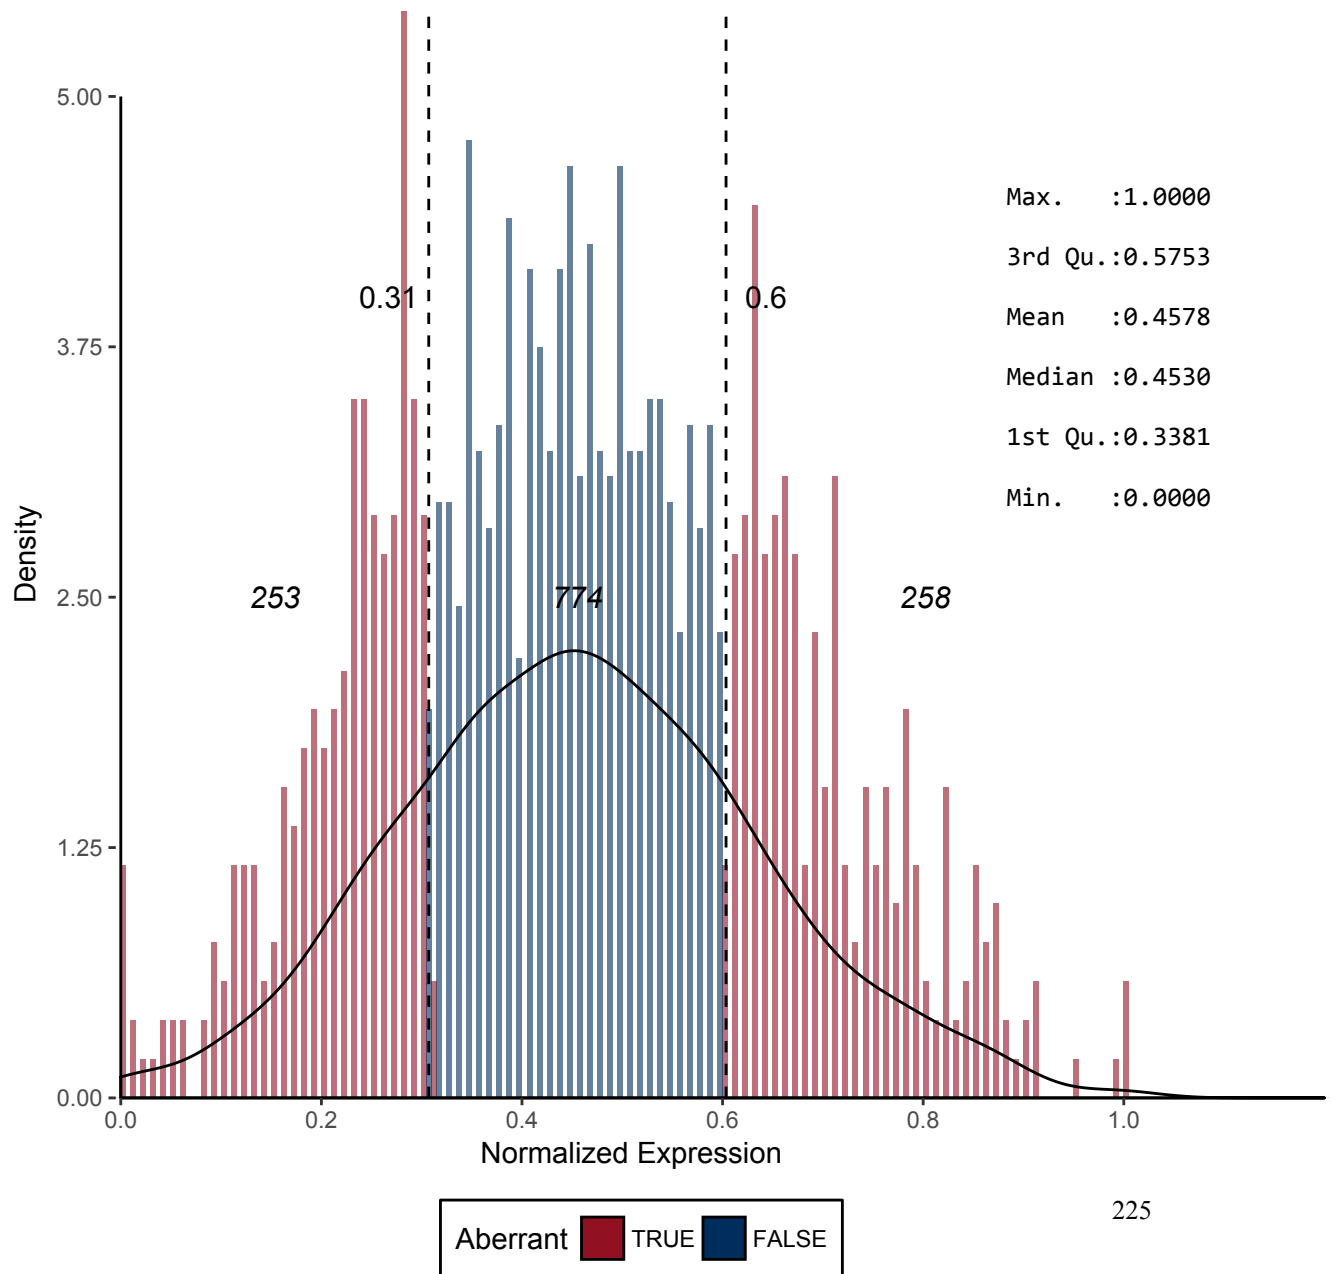

Figure 209 - CD197

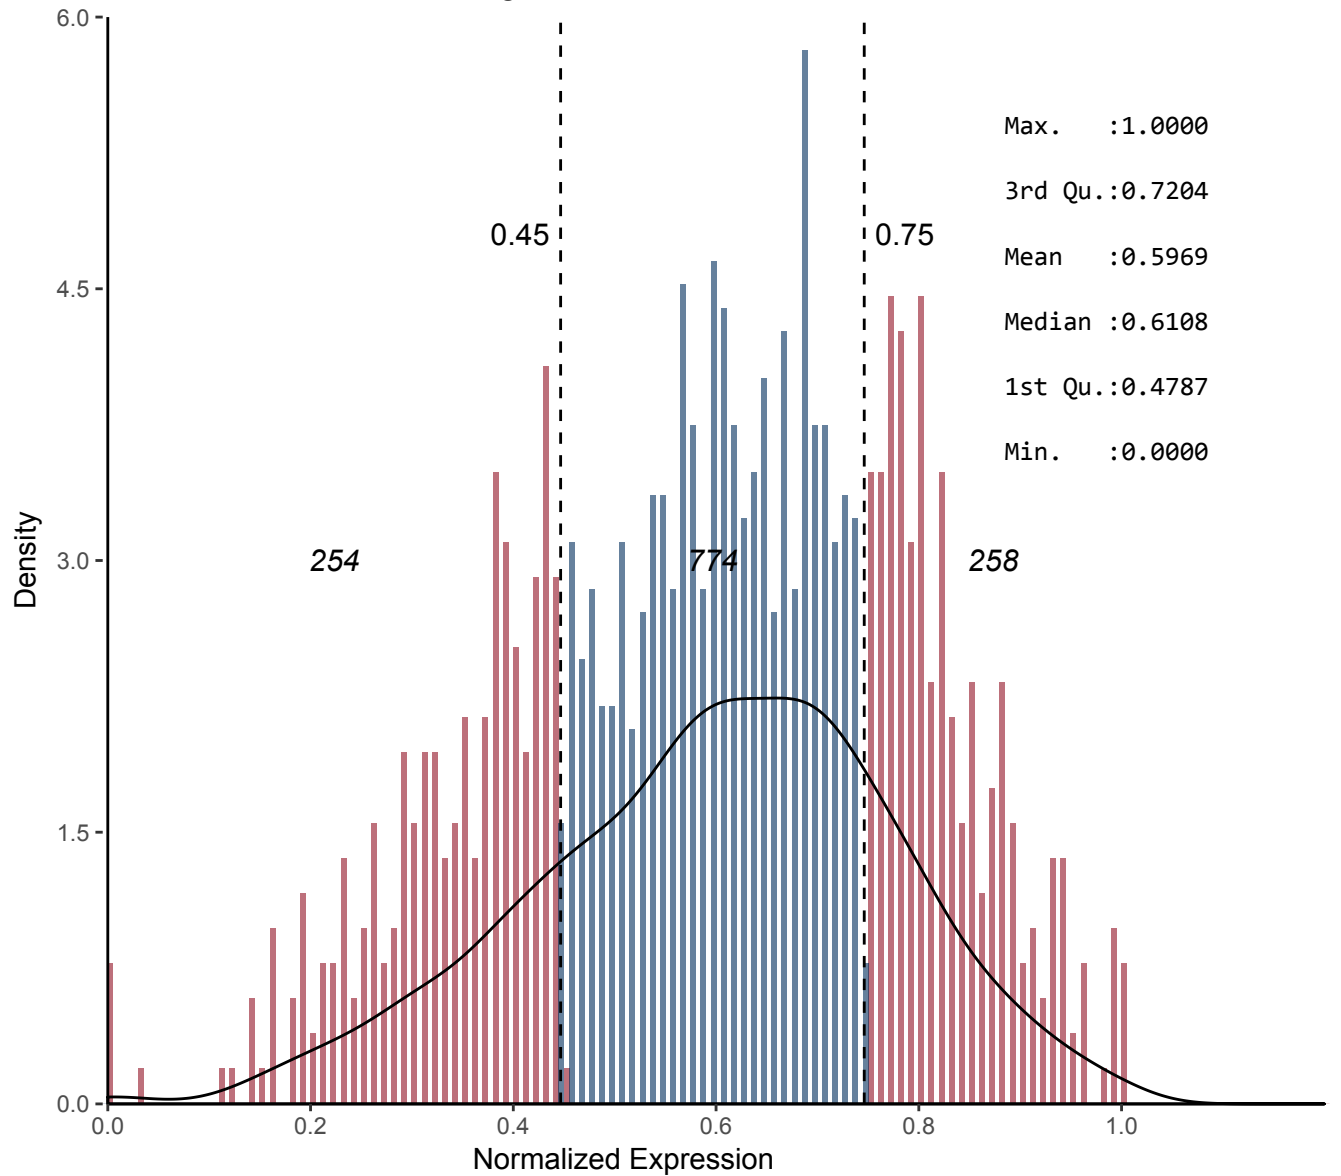

Aberrant TRUE FALSE

Figure 210 - CD199

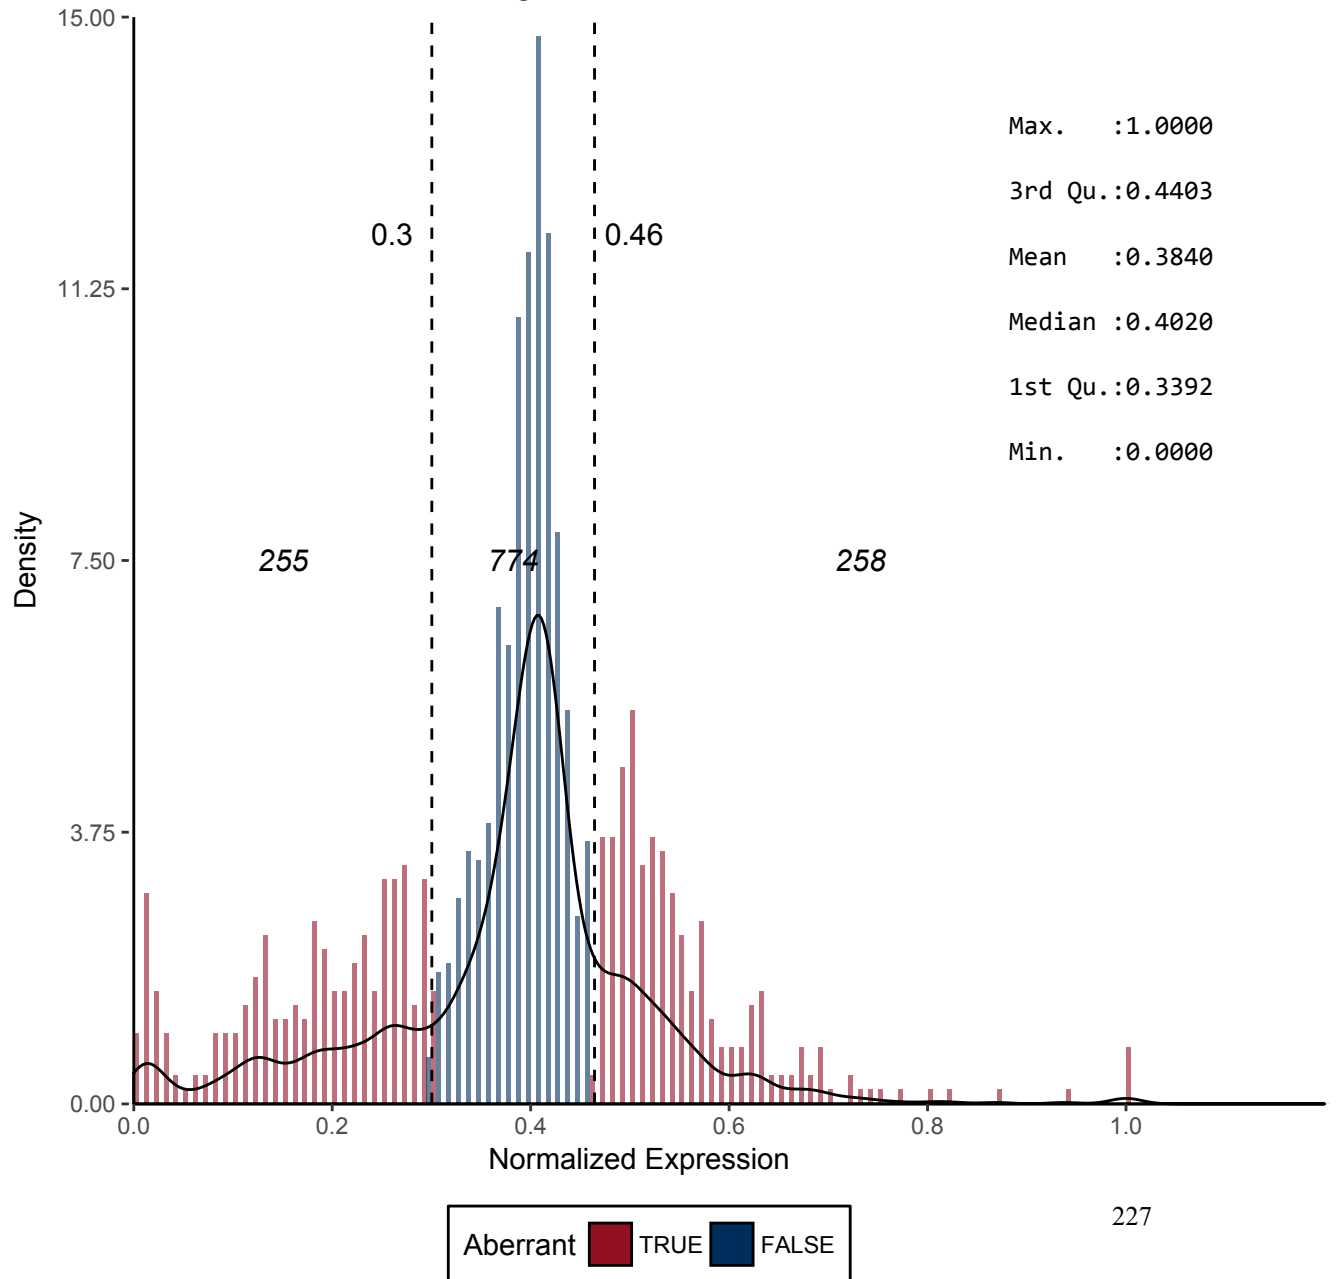

Figure 211 - CD200\*

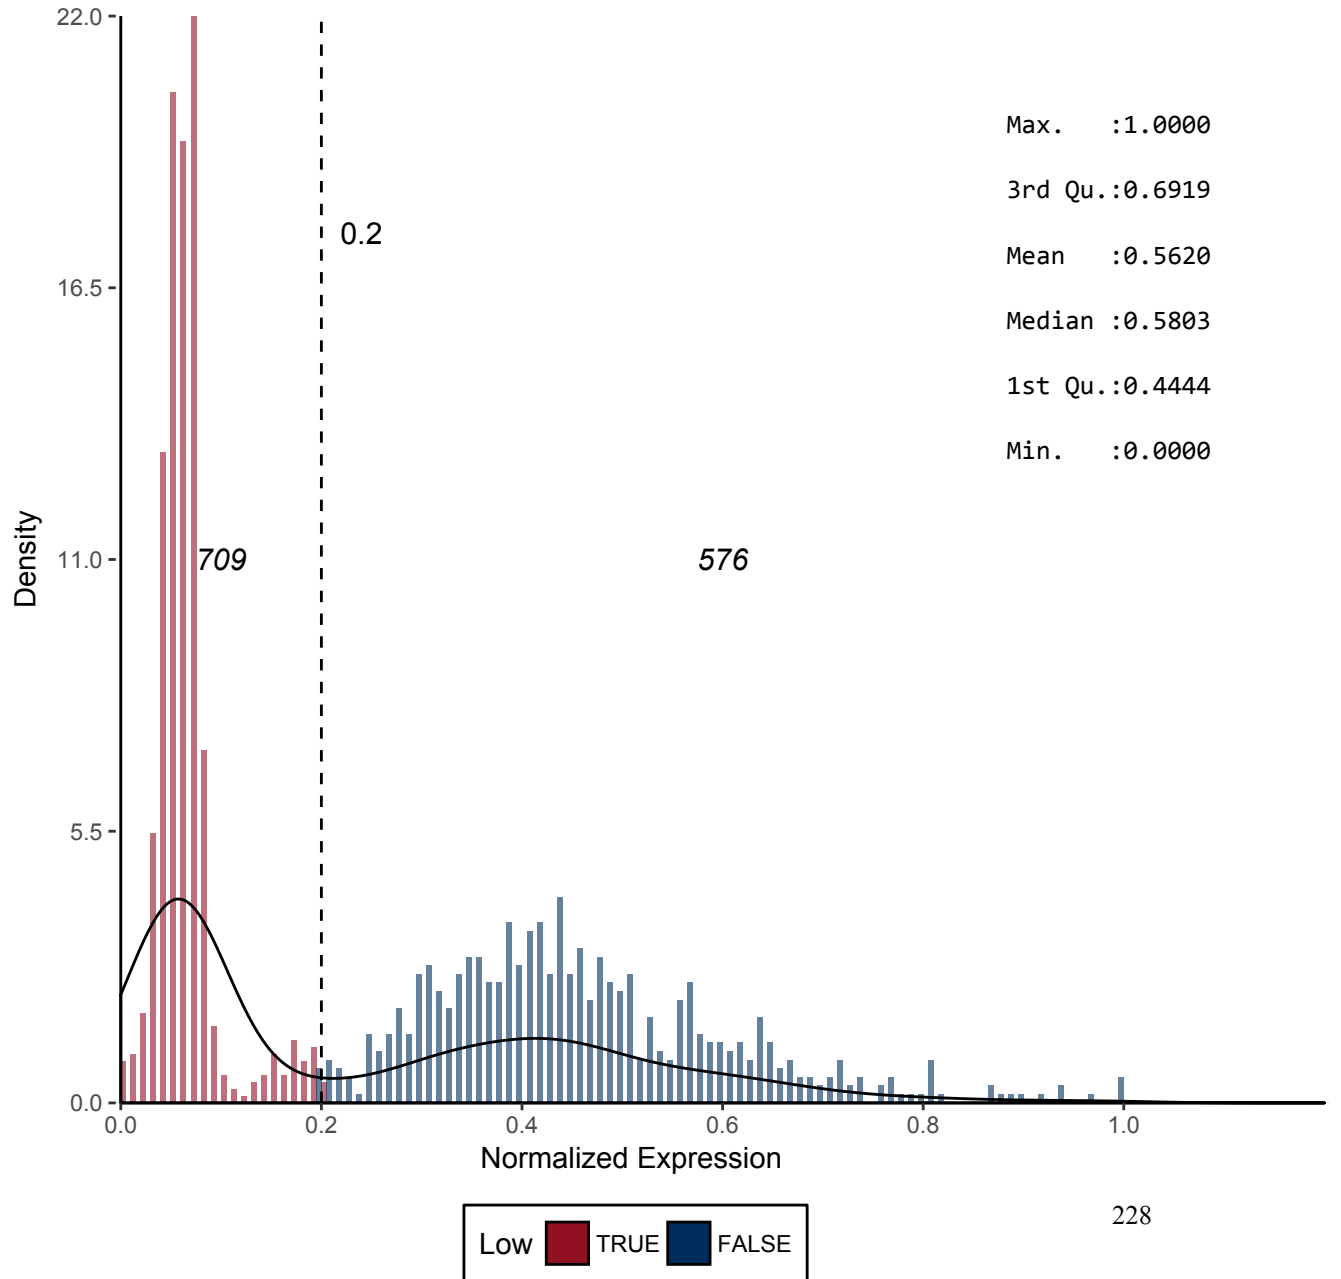

Figure 212 - CD201

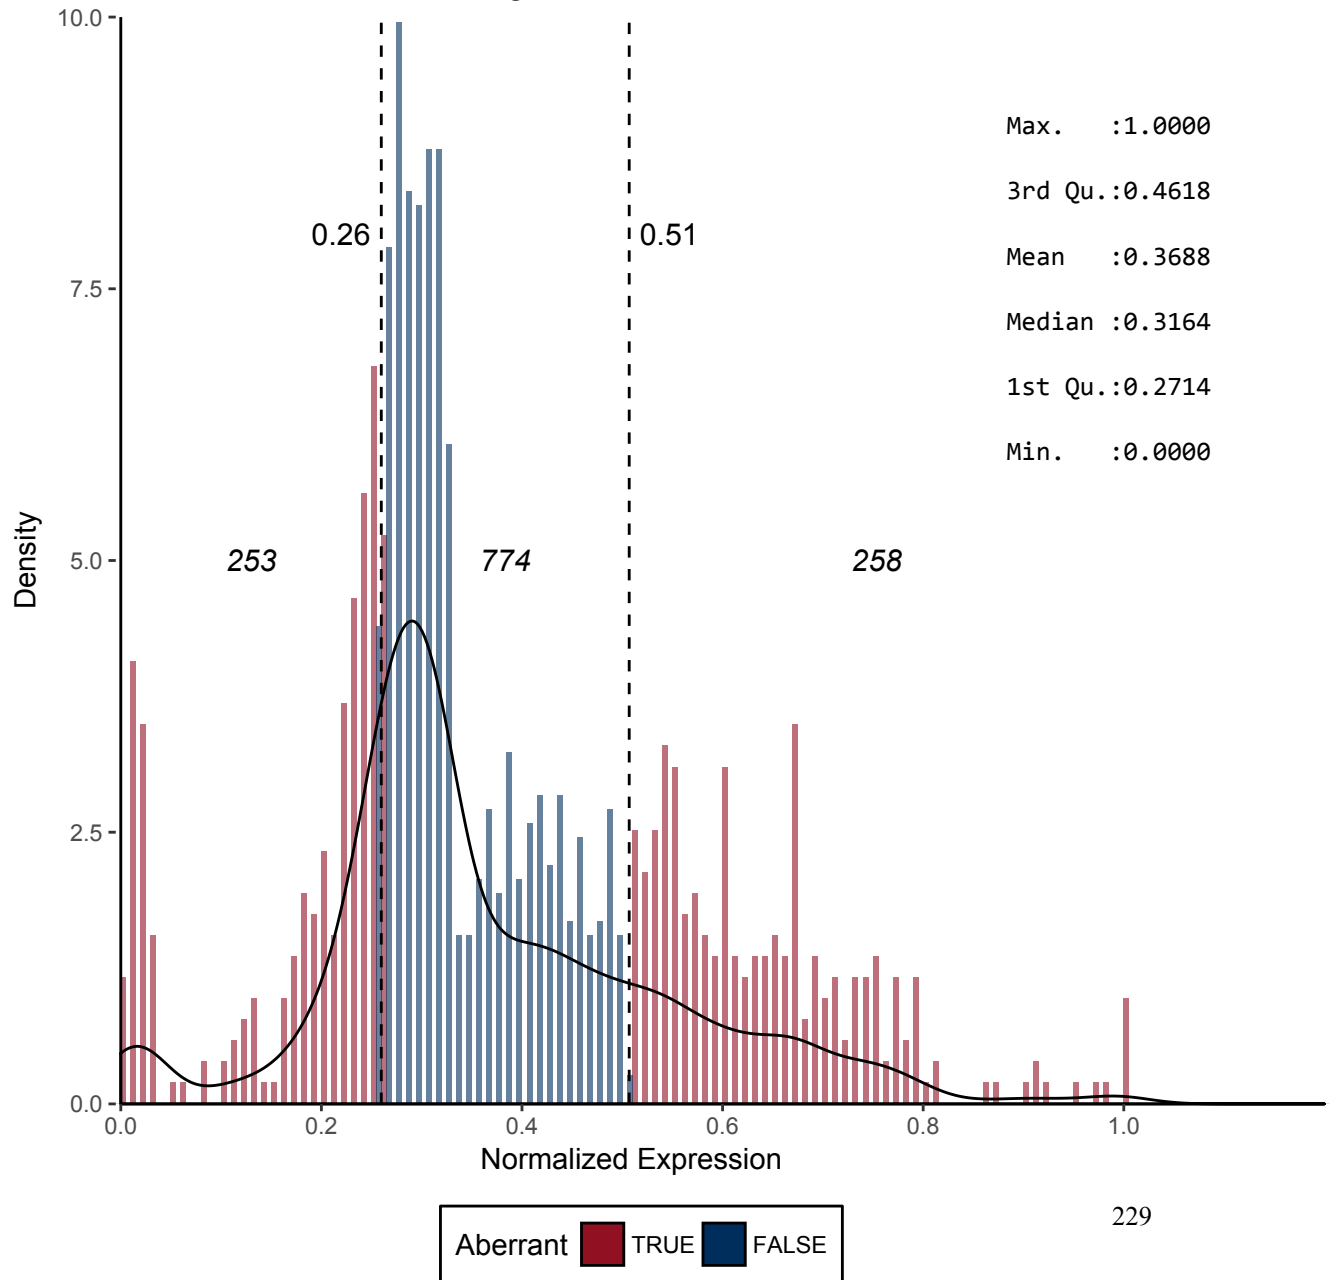

Figure 213 - CD202B\*

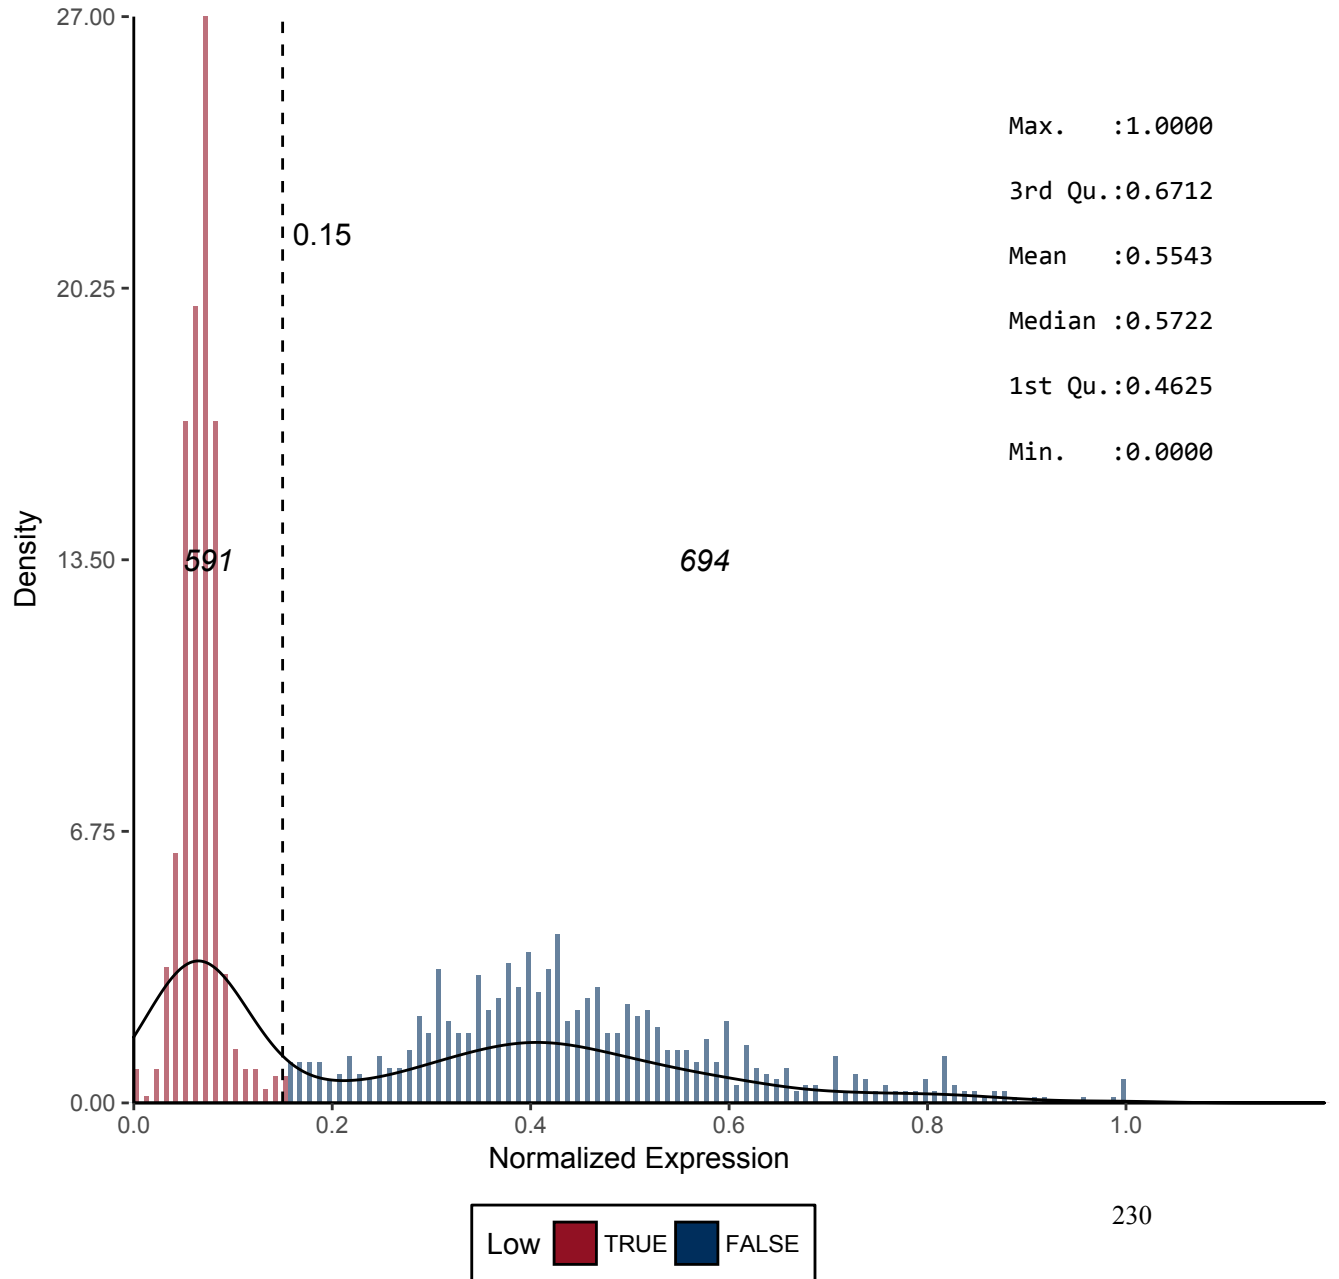

Figure 214 - CD203C\*

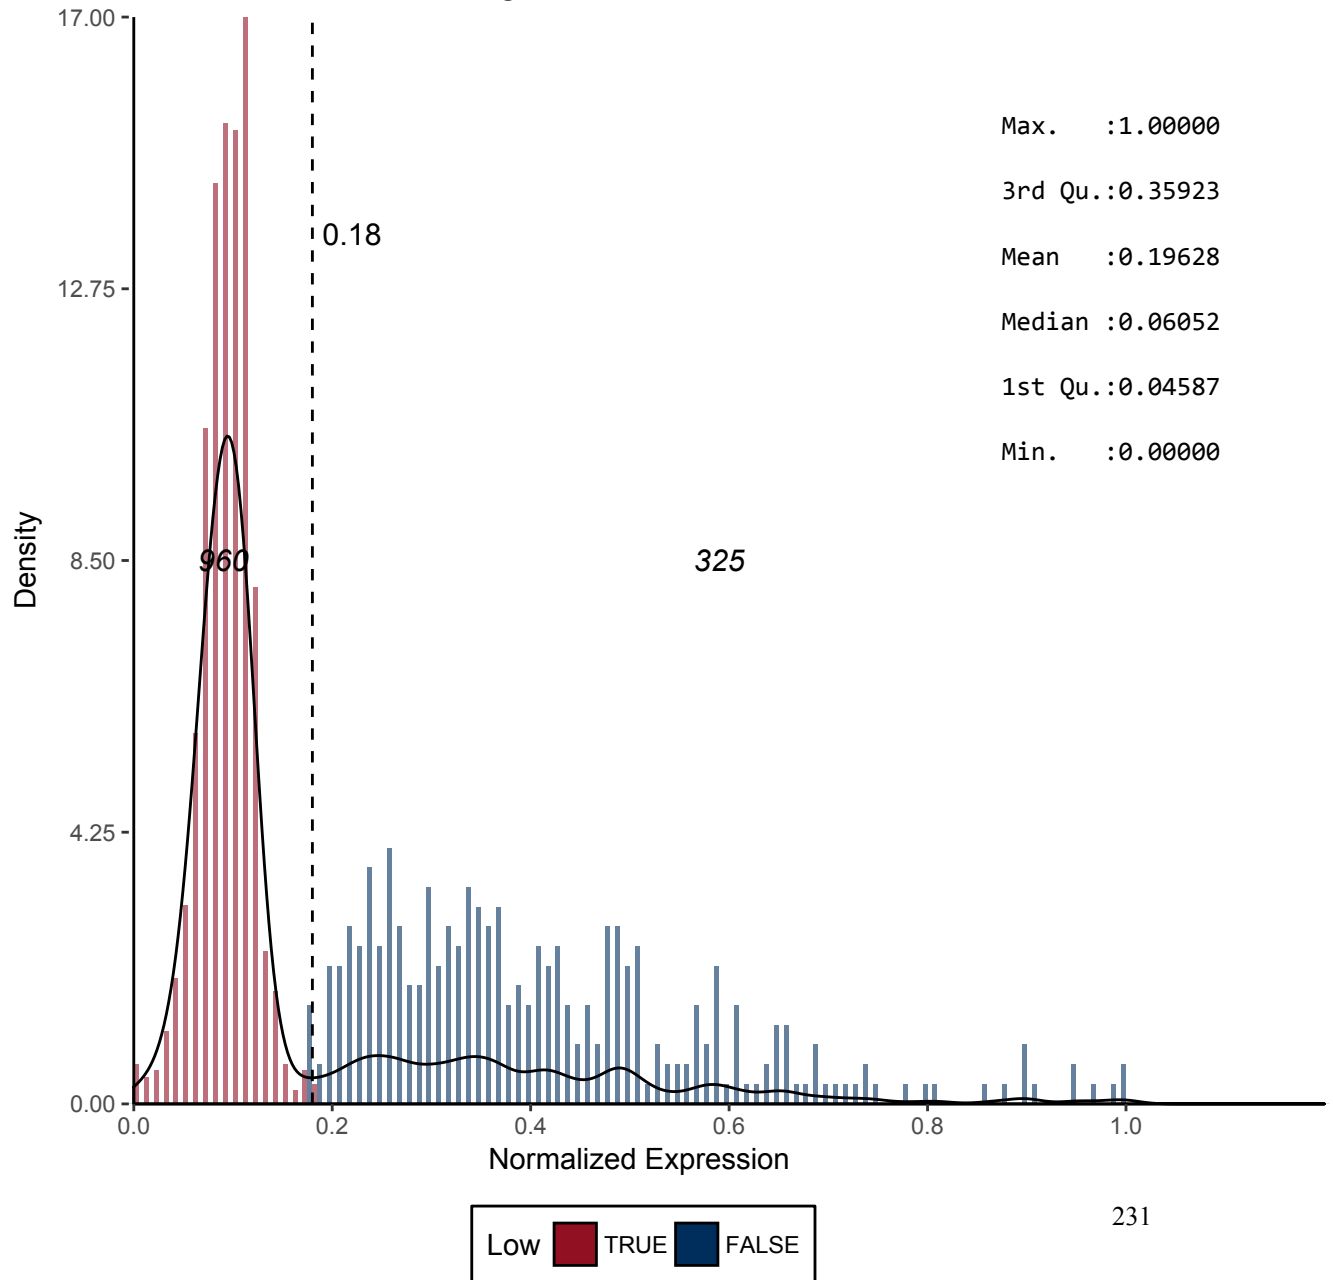

Figure 215 - CD204\*

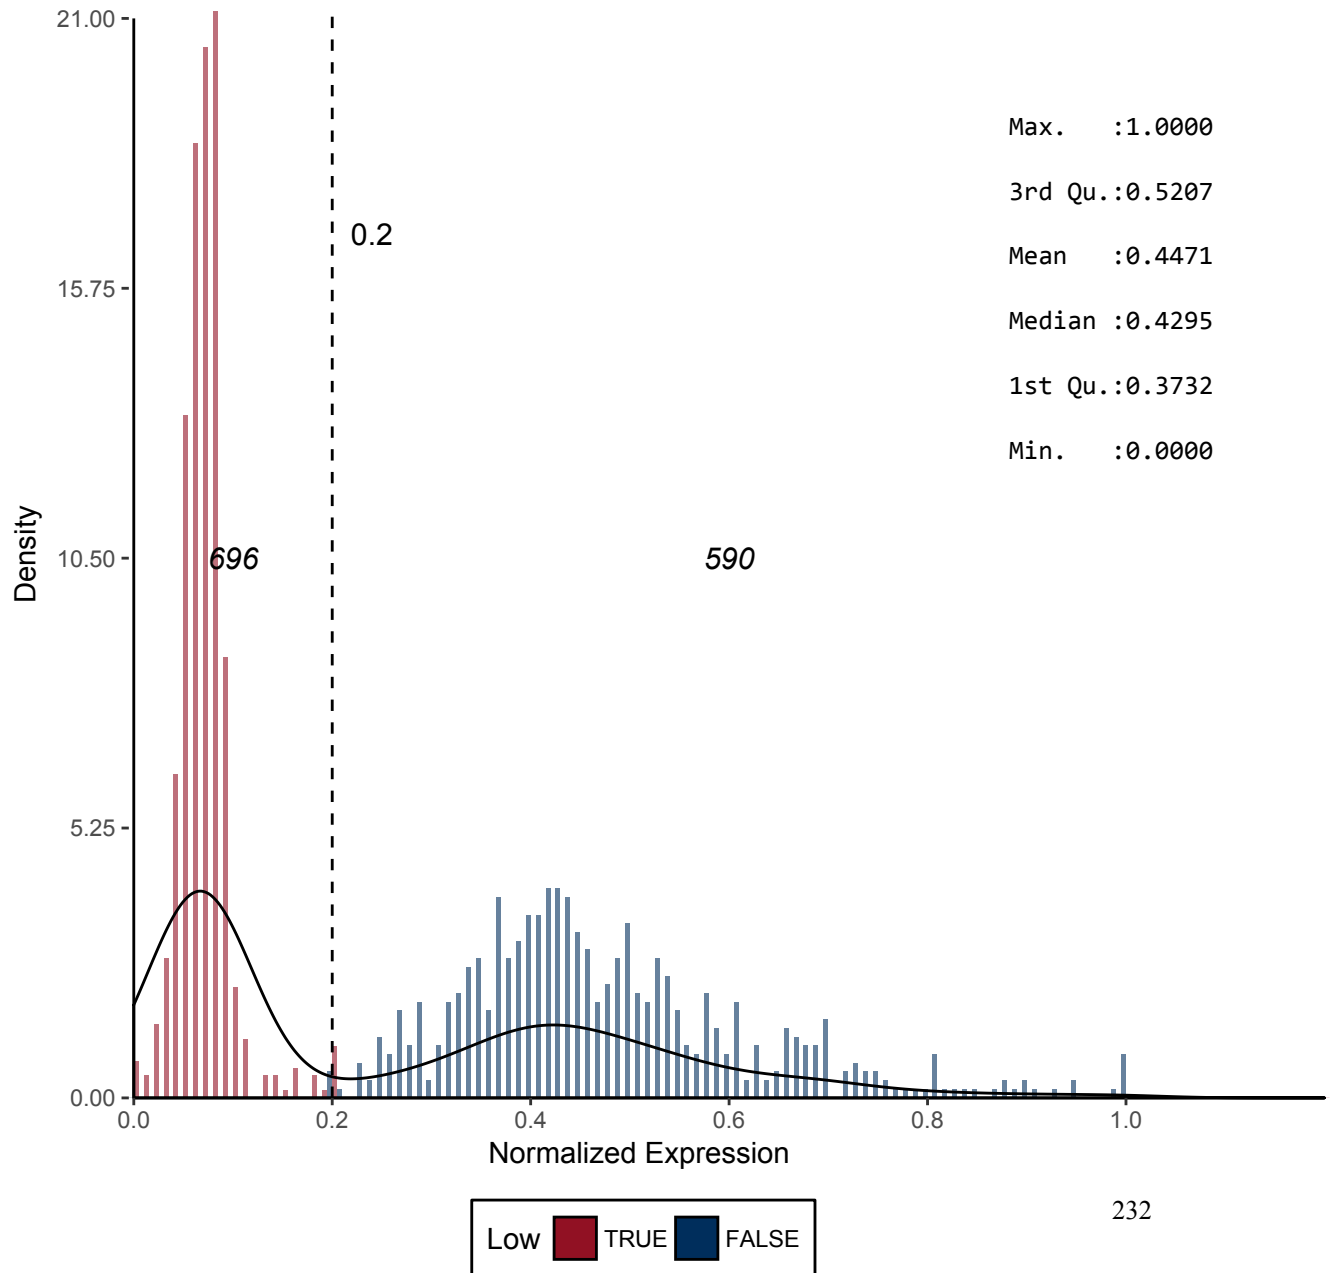



Figure 216 - CD205

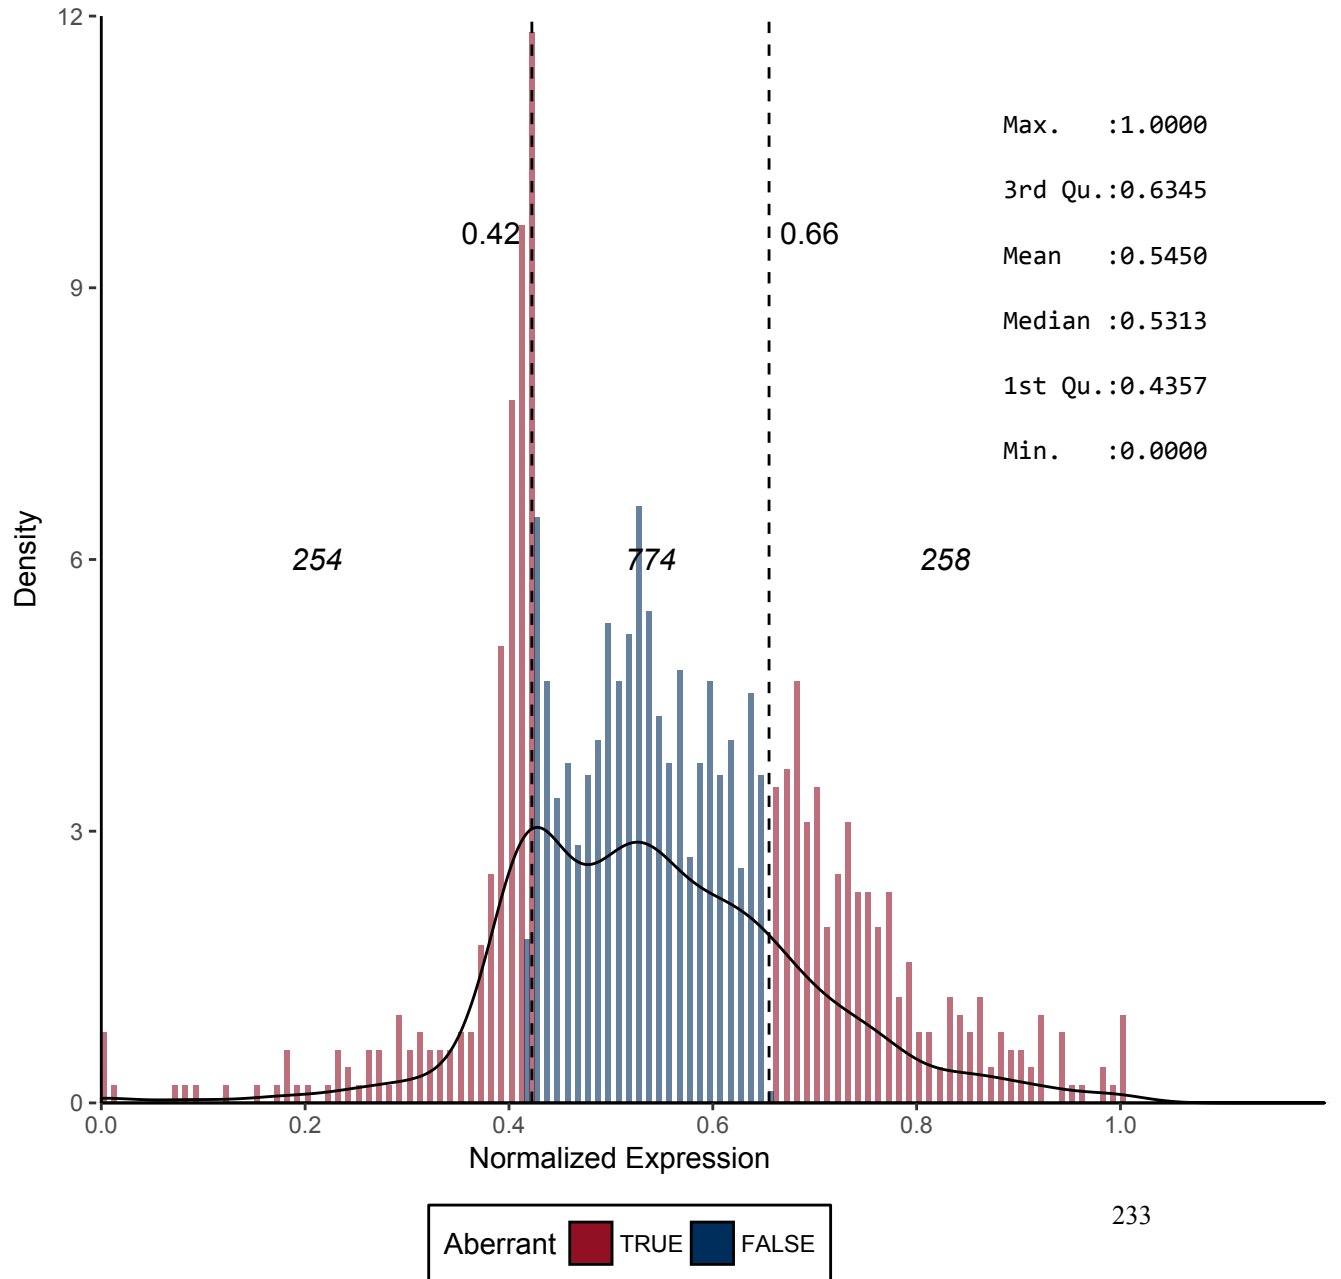

Figure 217 - CD206\*

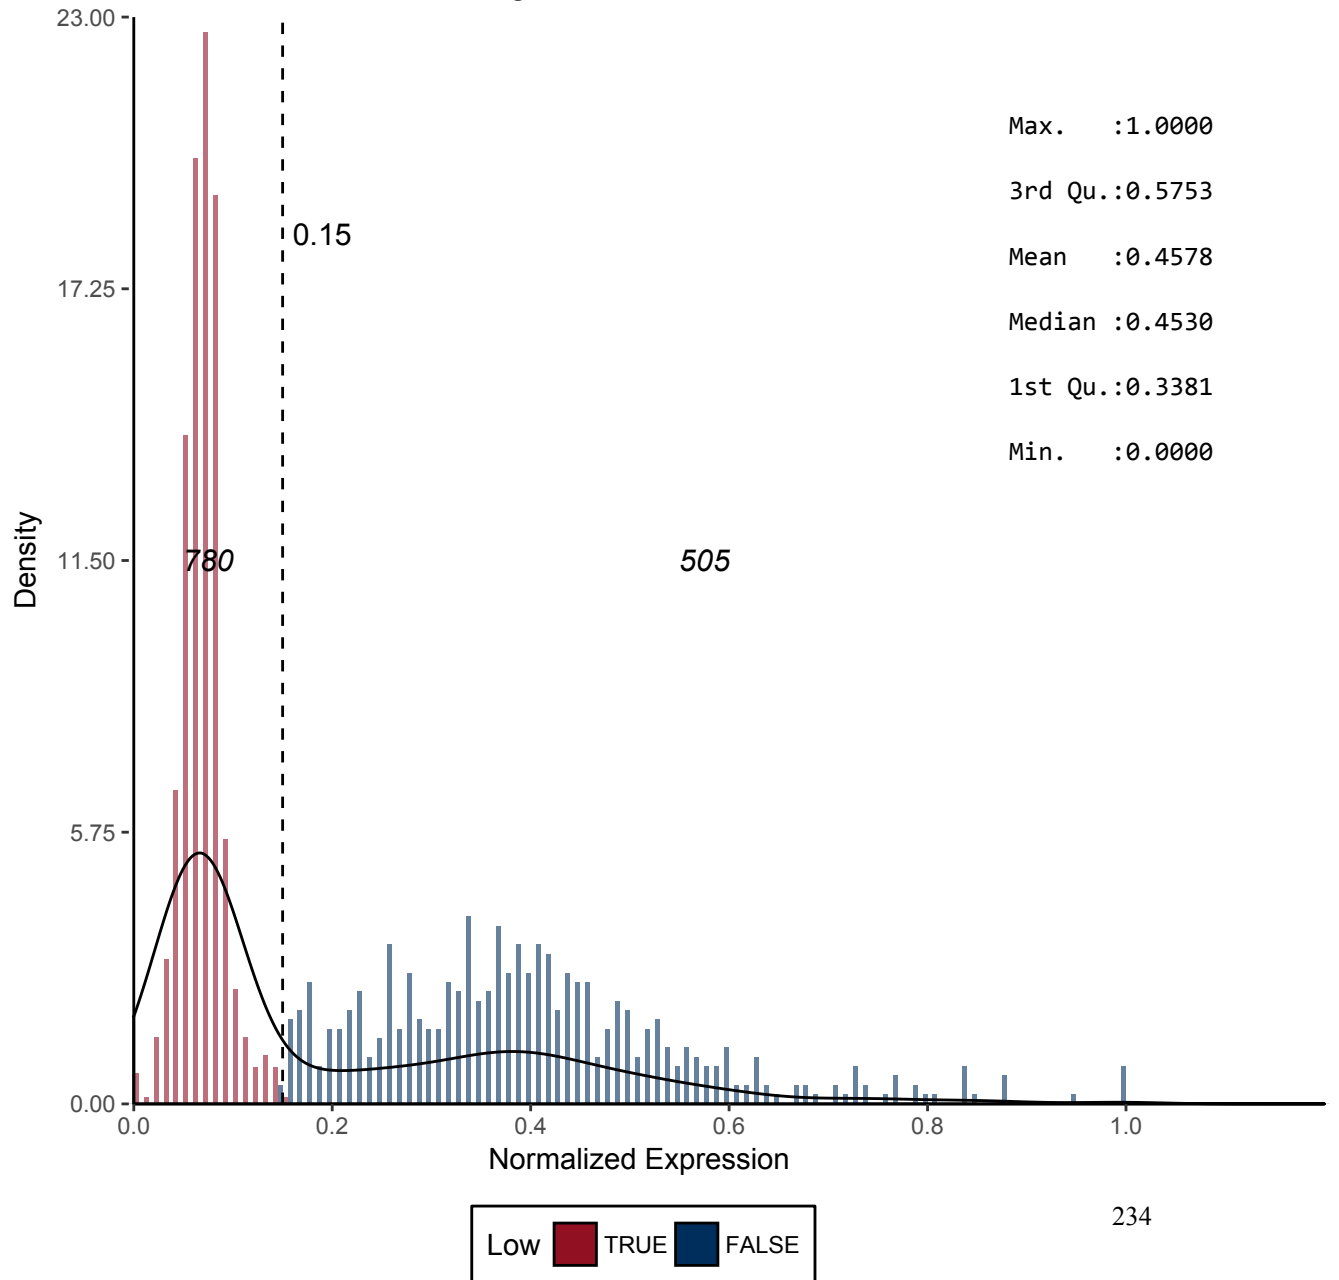

Figure 218 - CD207\*

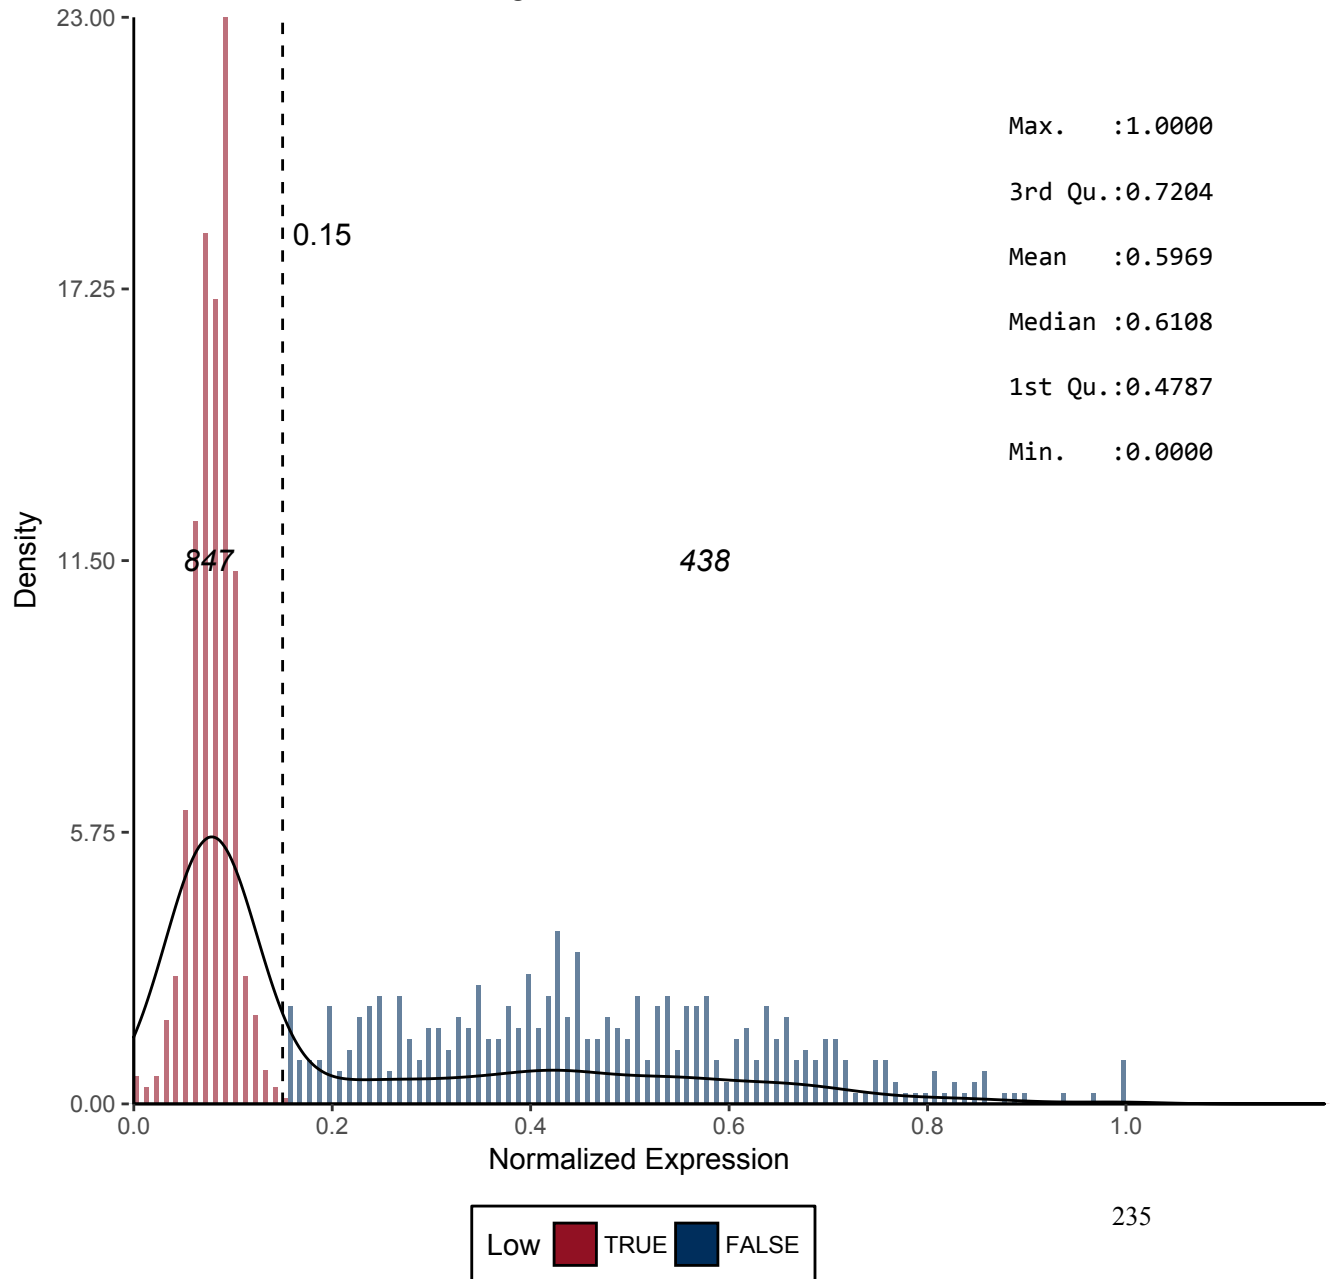

Figure 219 - CD208

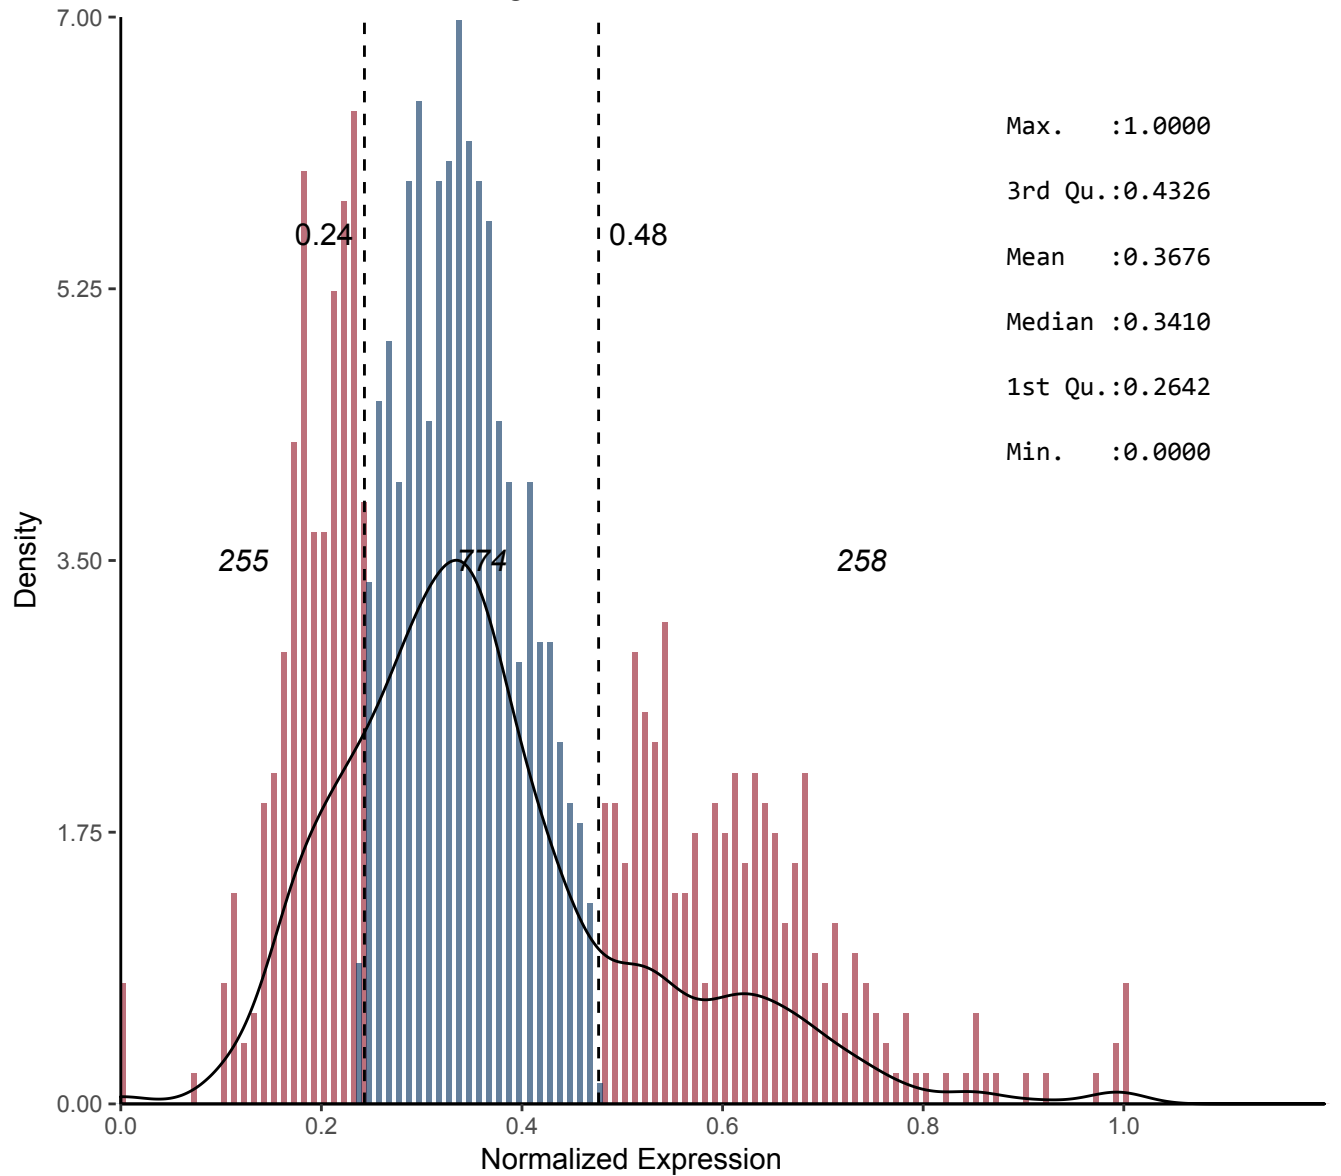

Aberrant TRUE FALSE

Figure 220 - CD209\*

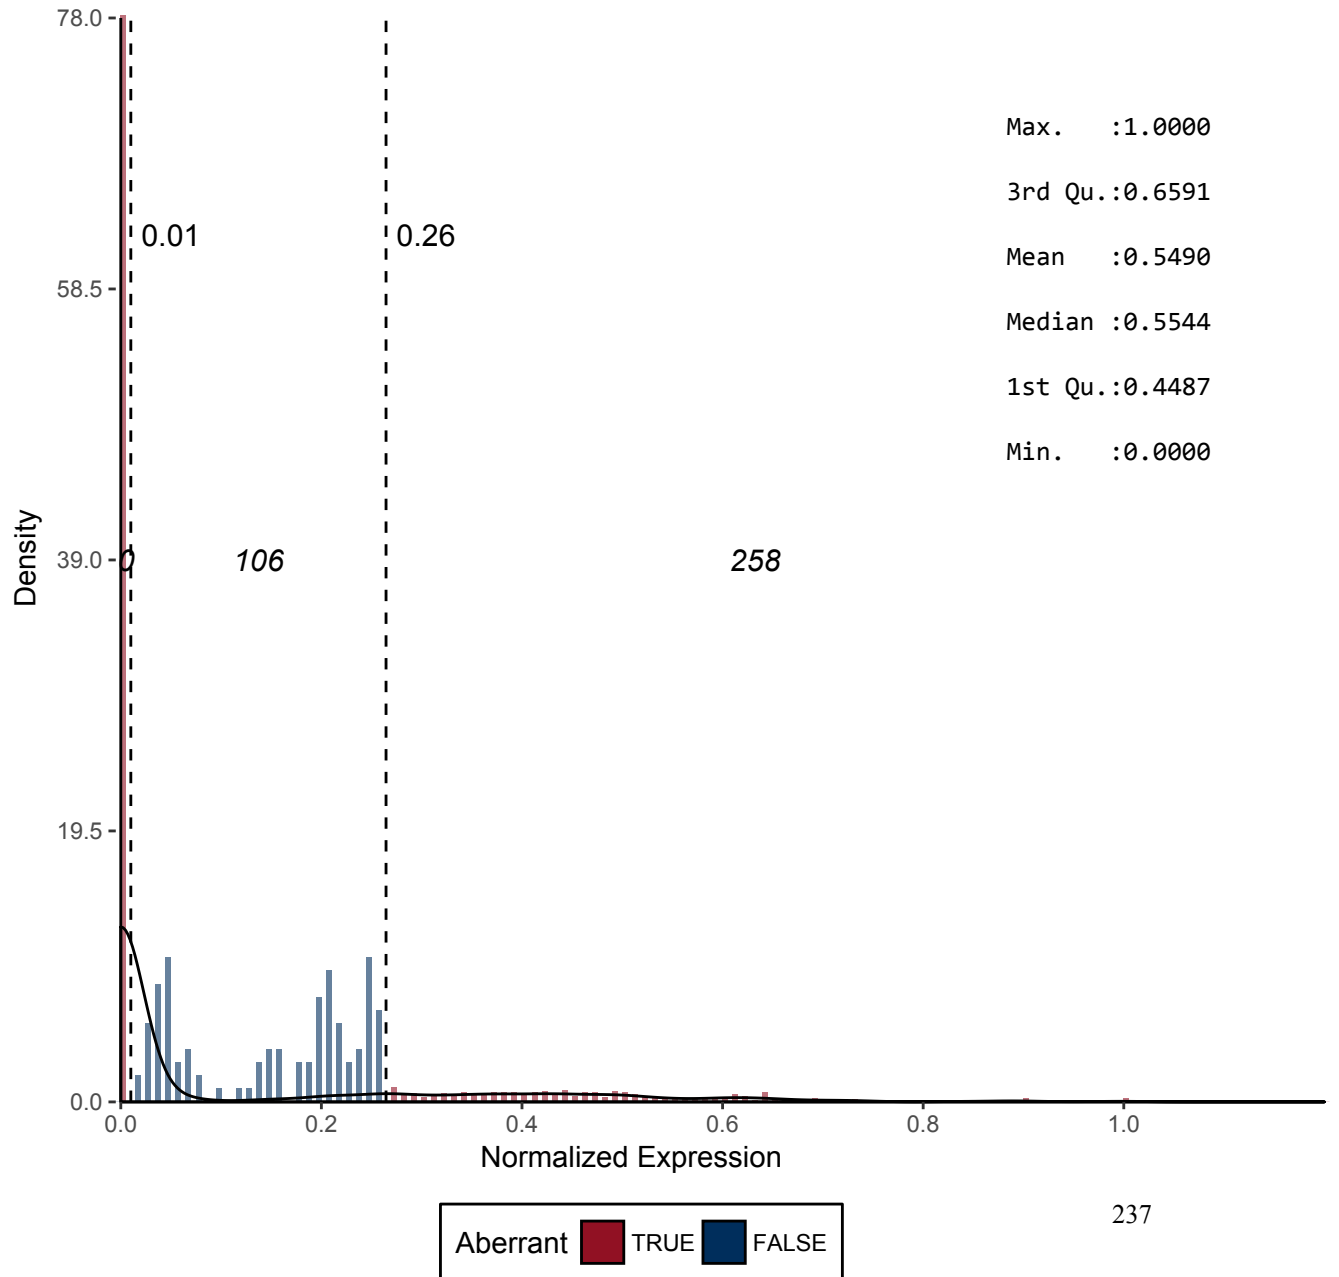

Figure 221 - CD210

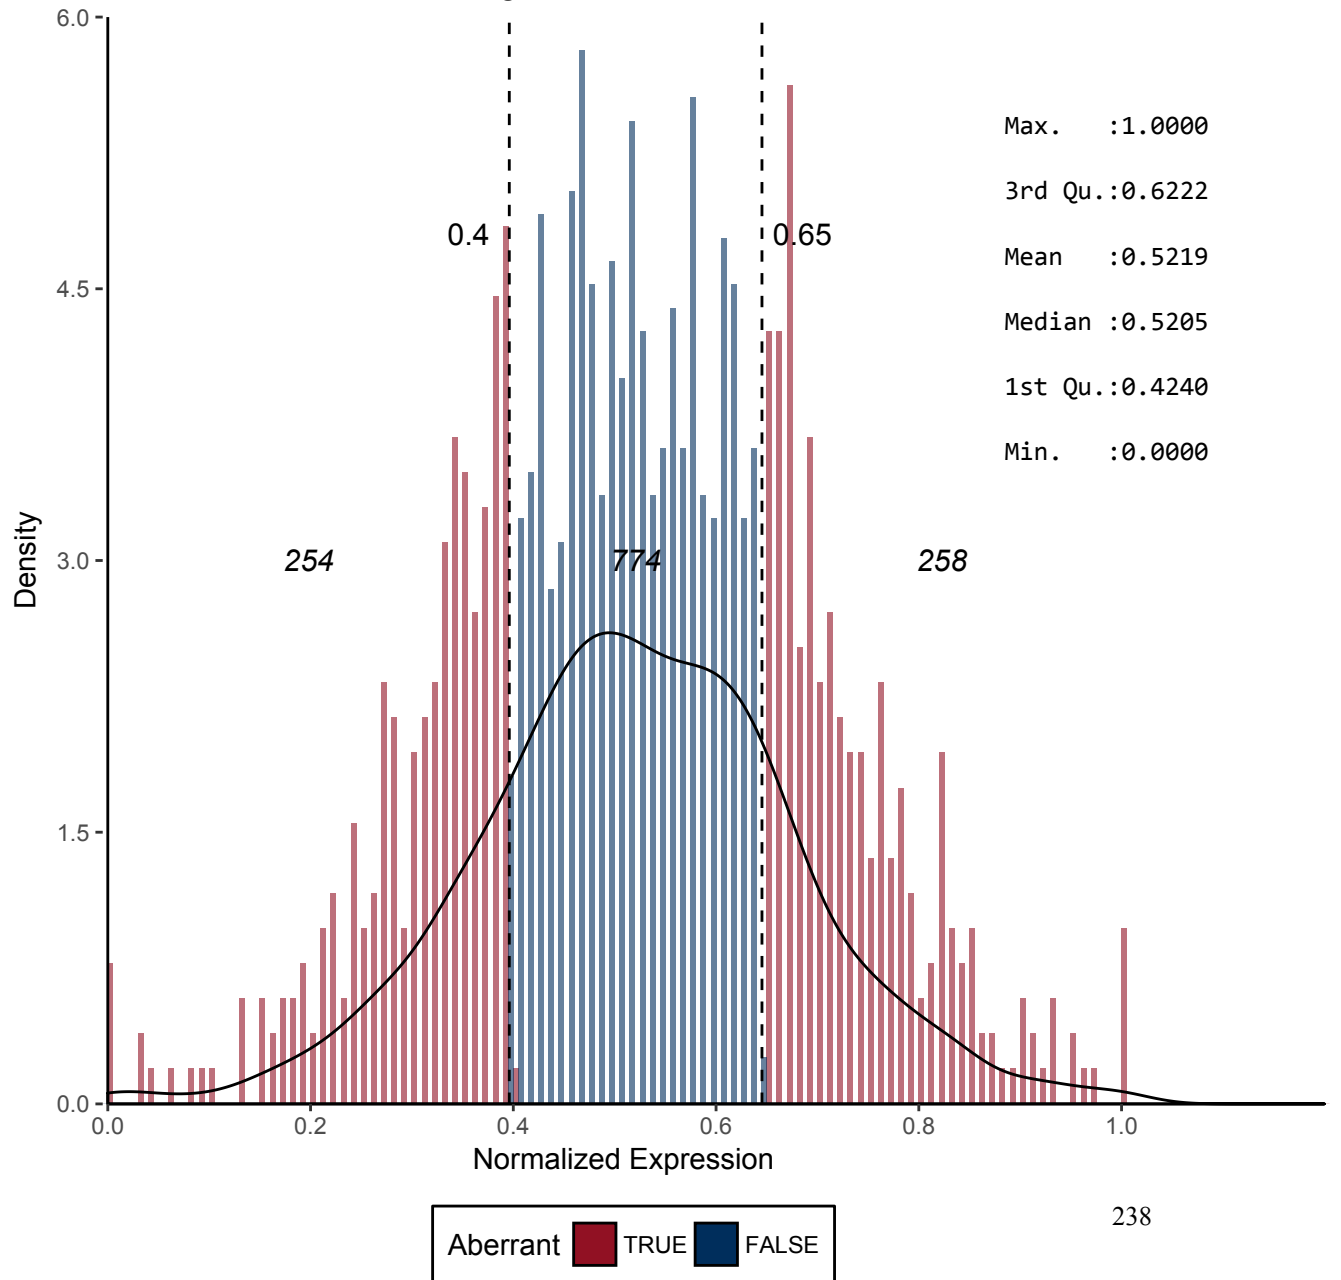

Figure 222 - CDW210B

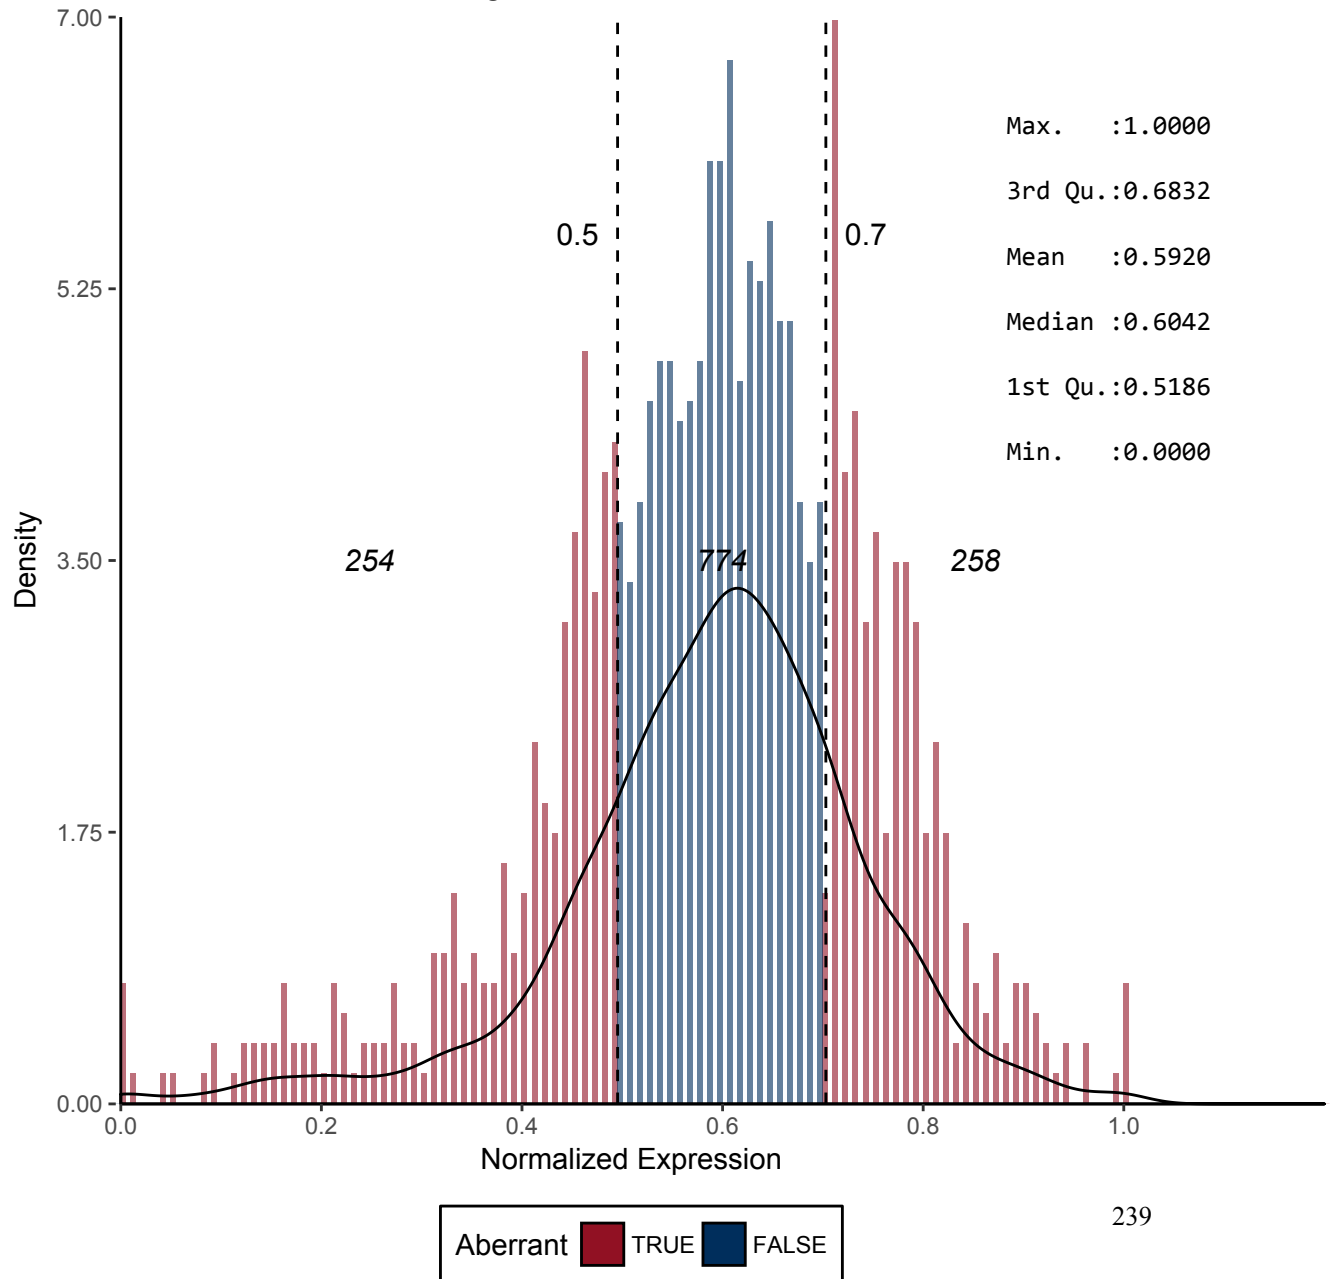

Figure 223 - CD212

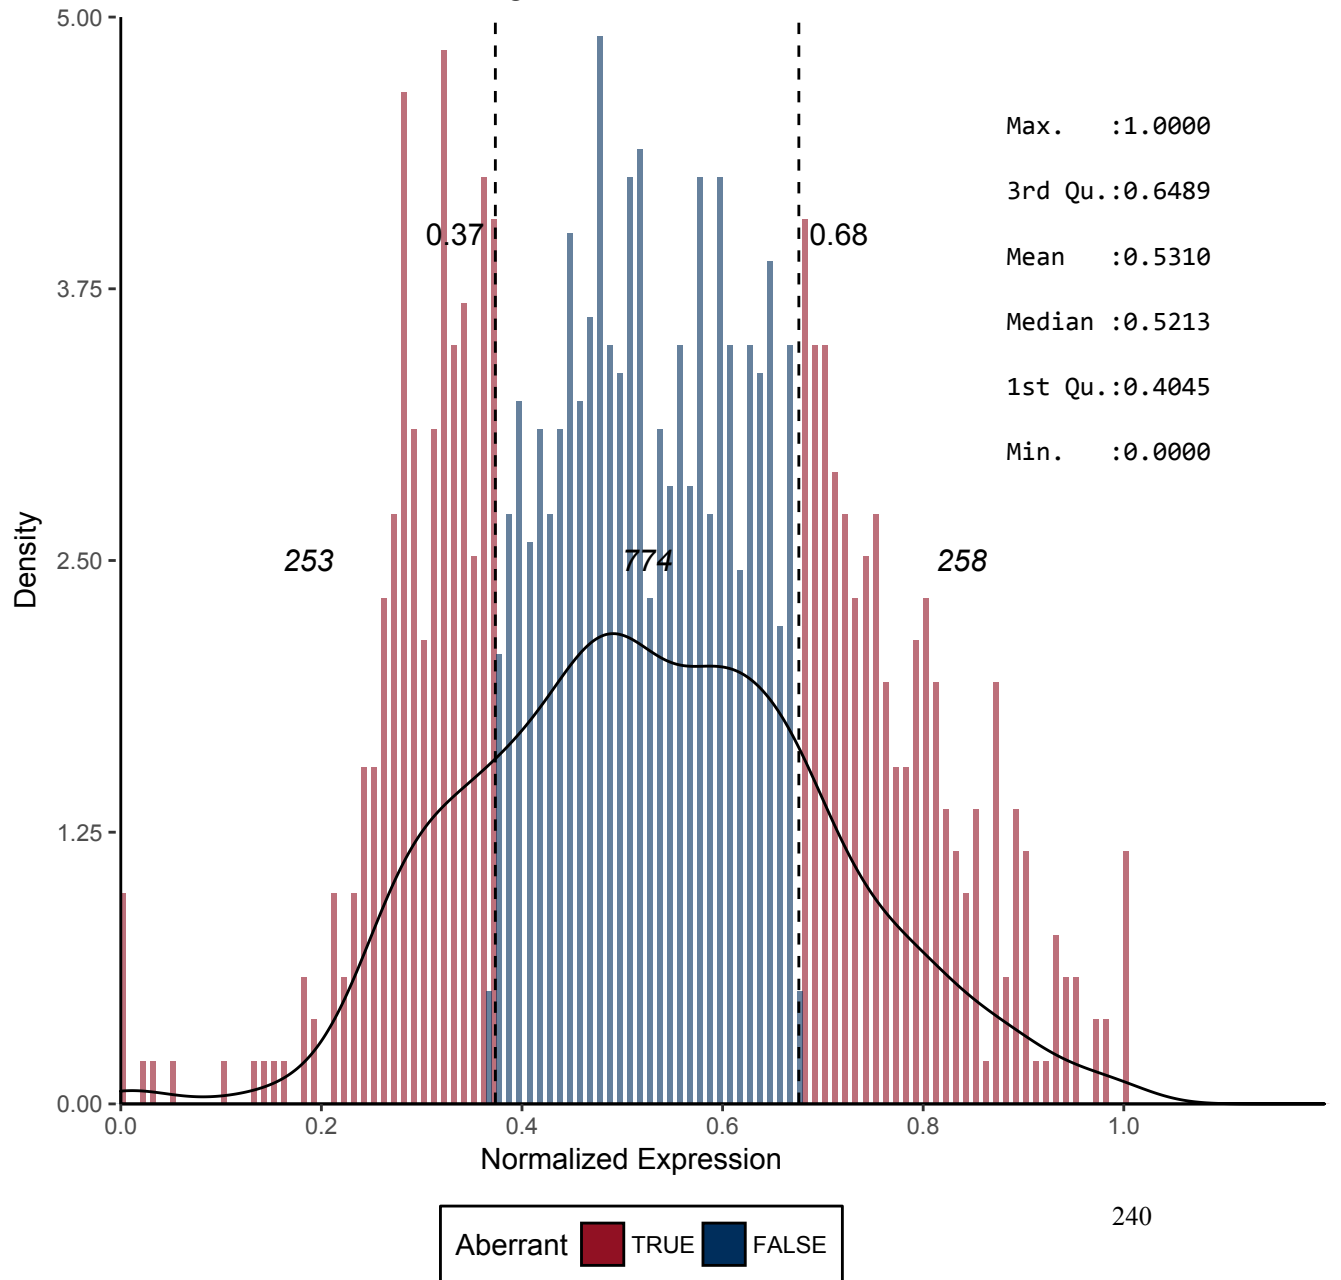



Figure 224 - CD213A1

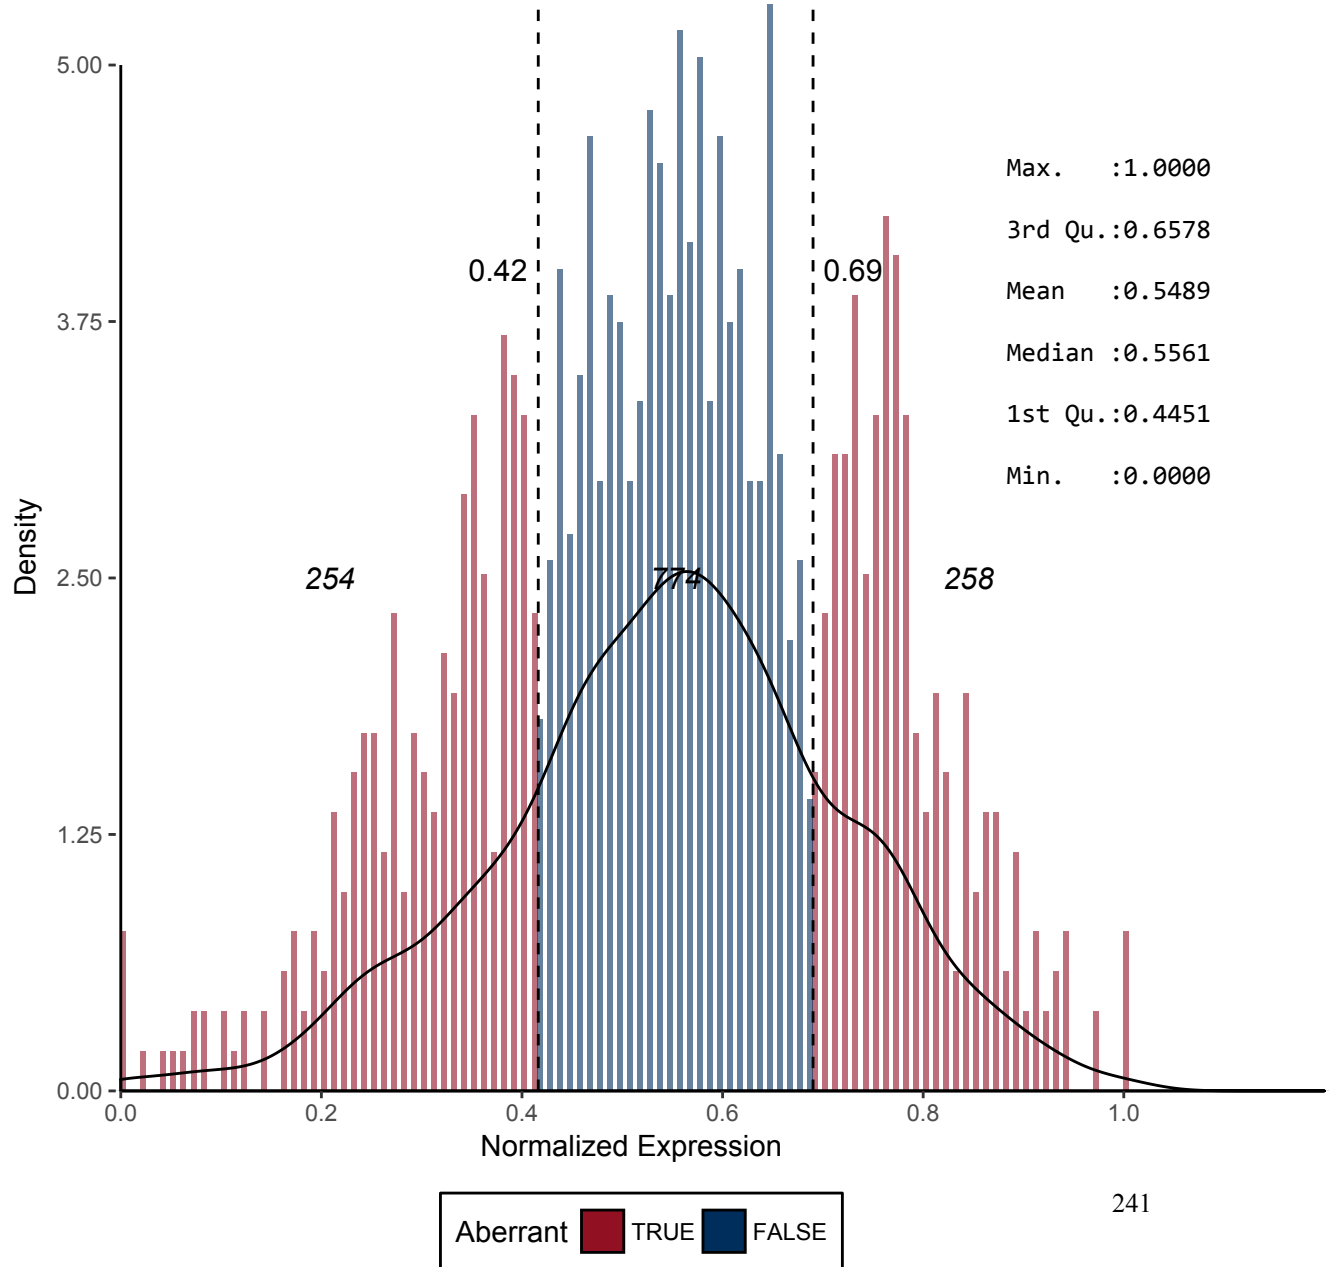

Figure 225 - CD213A2\*

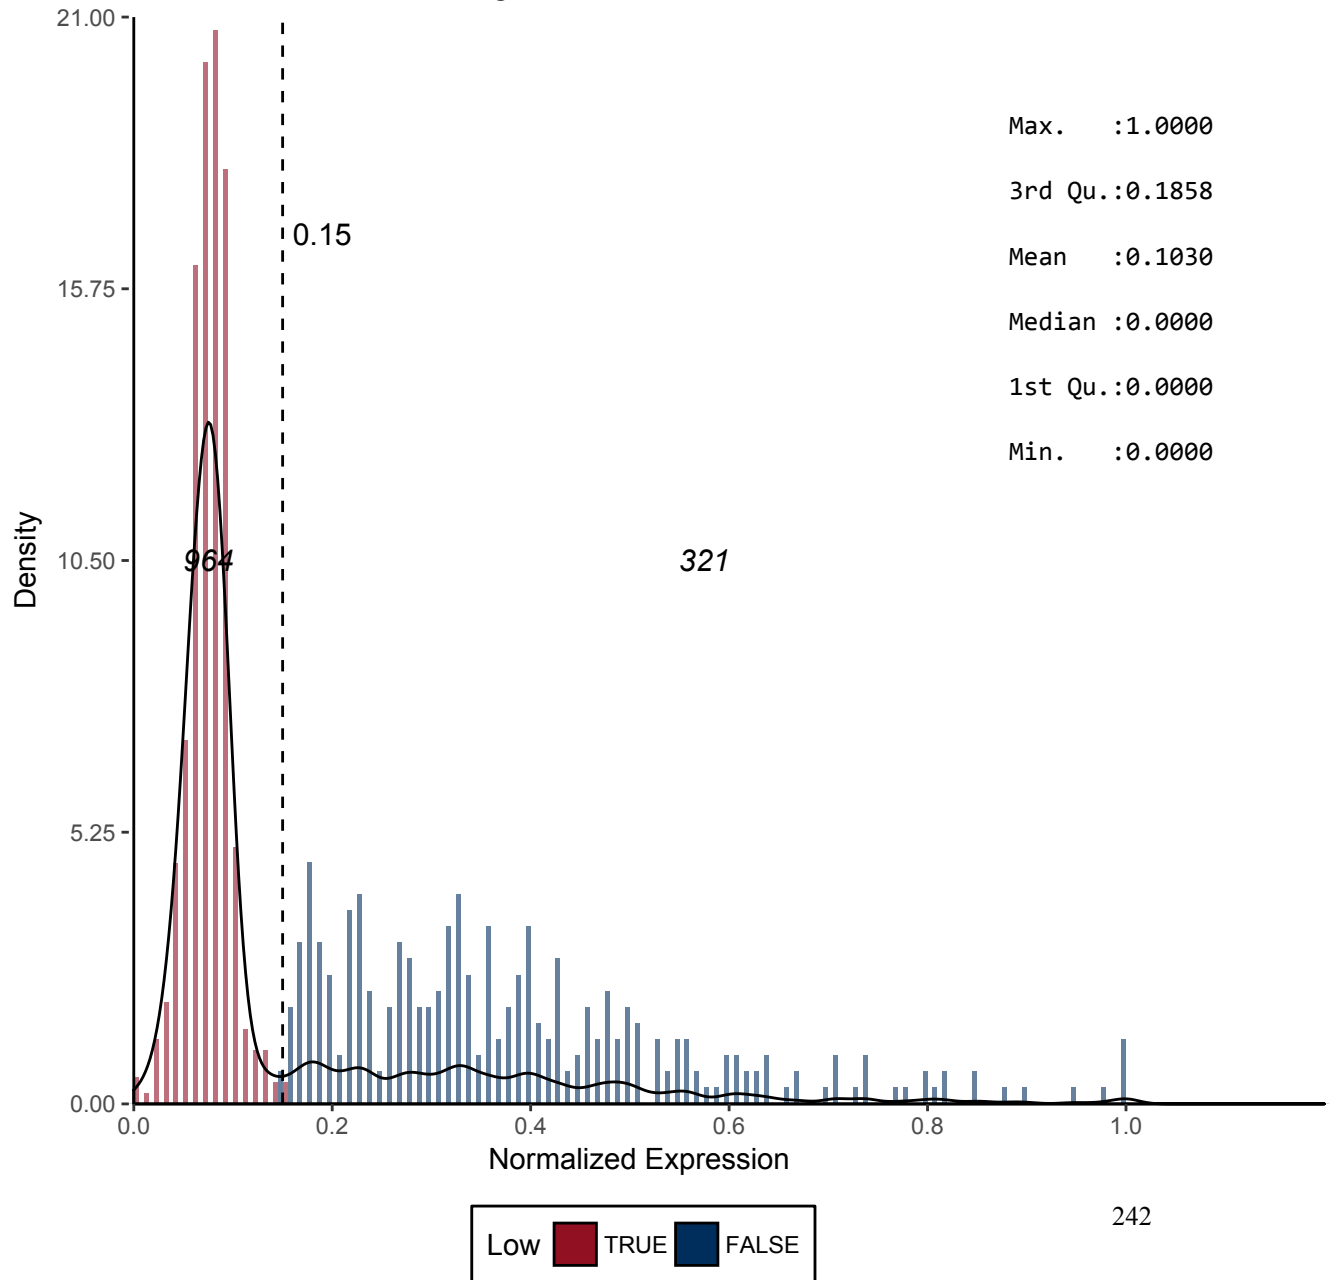

Figure 226 - CD215\*

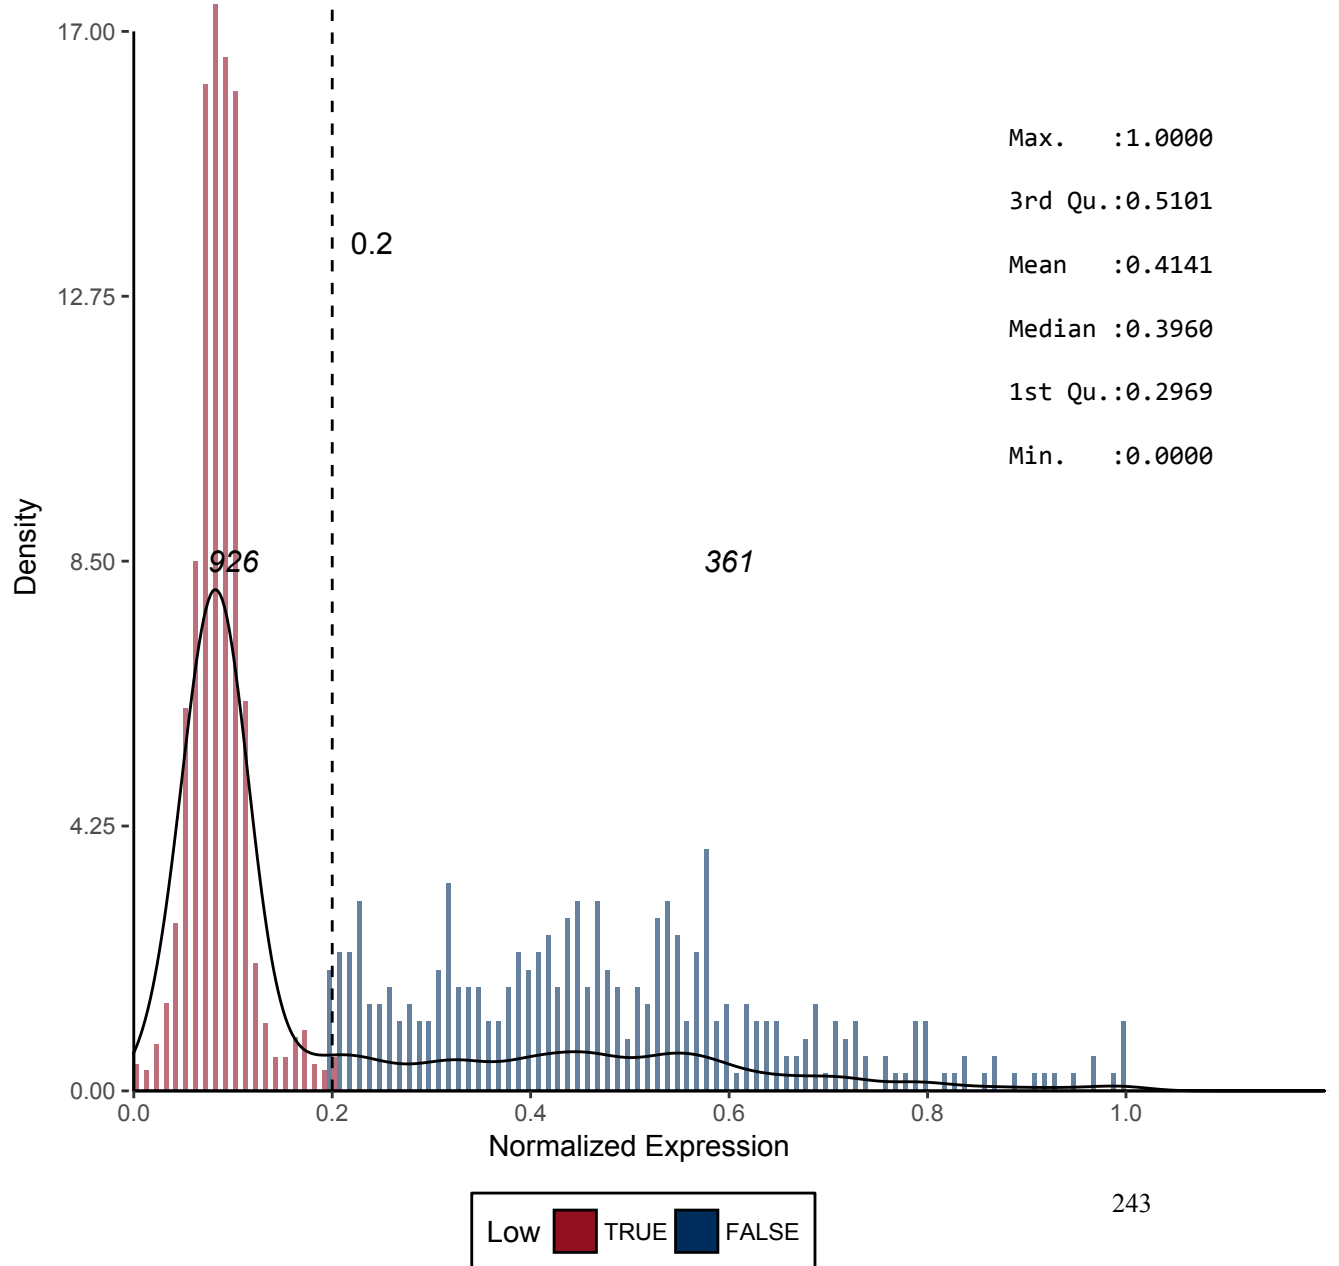

Figure 227 - CD217A

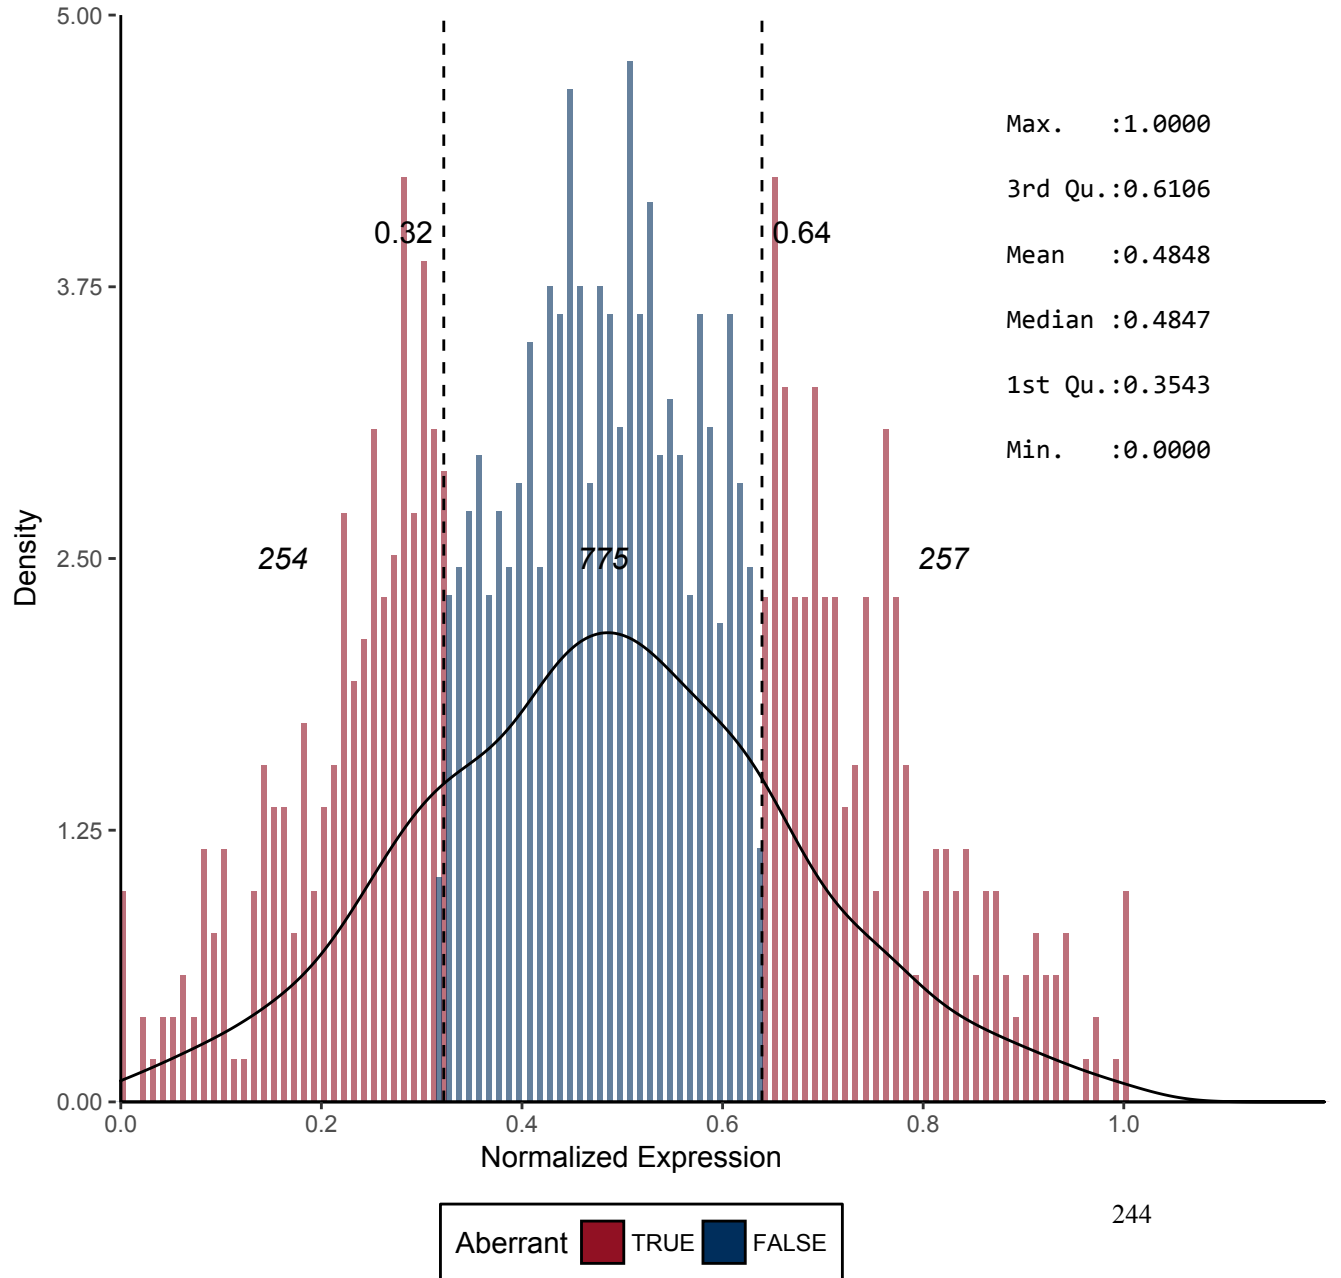

Figure 228 - CD218A

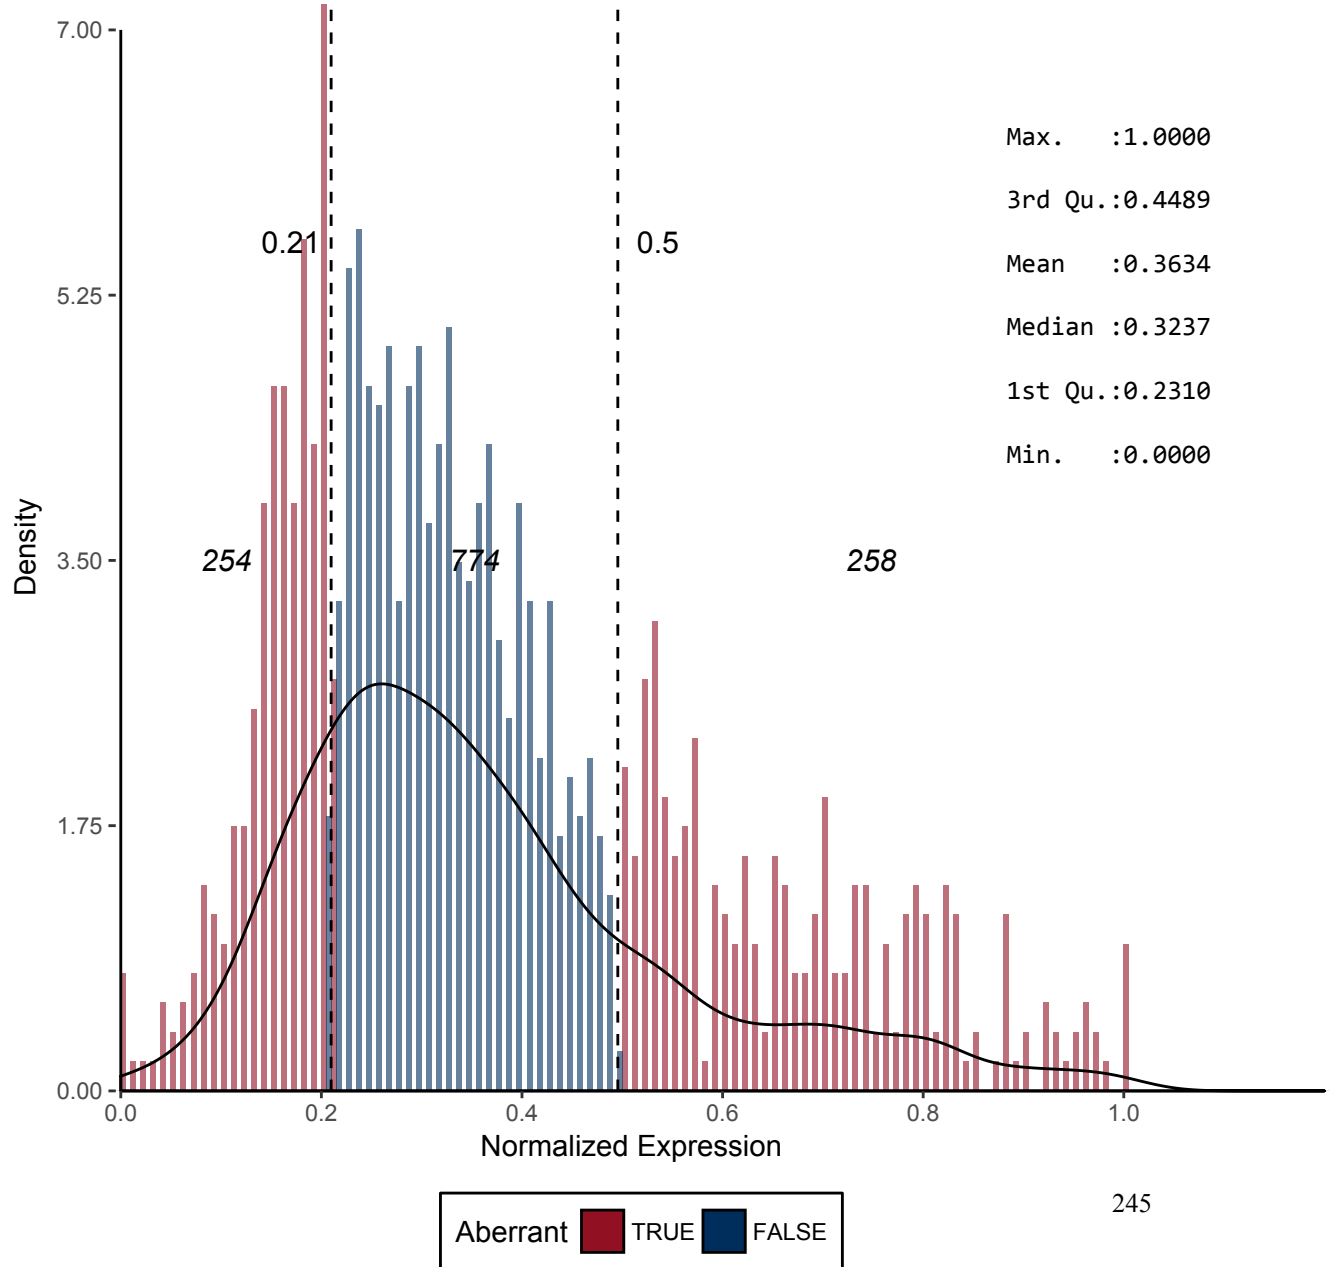

Figure 229 - CD218B

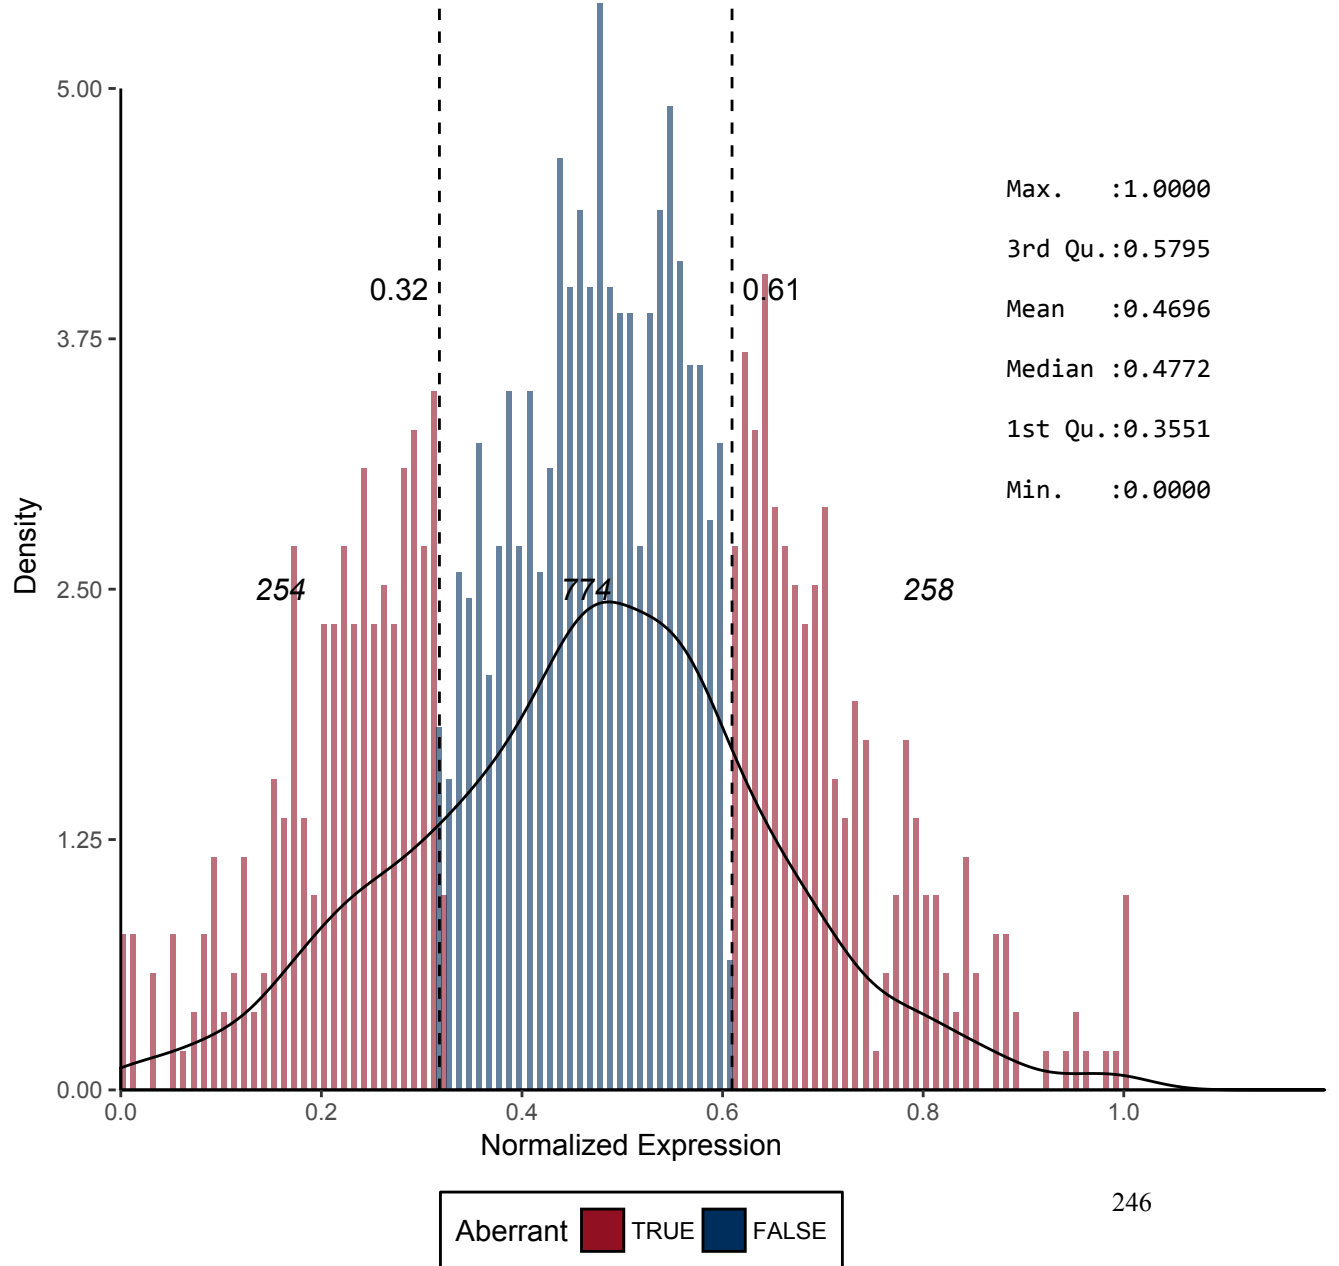

Figure 230 - CD220\*

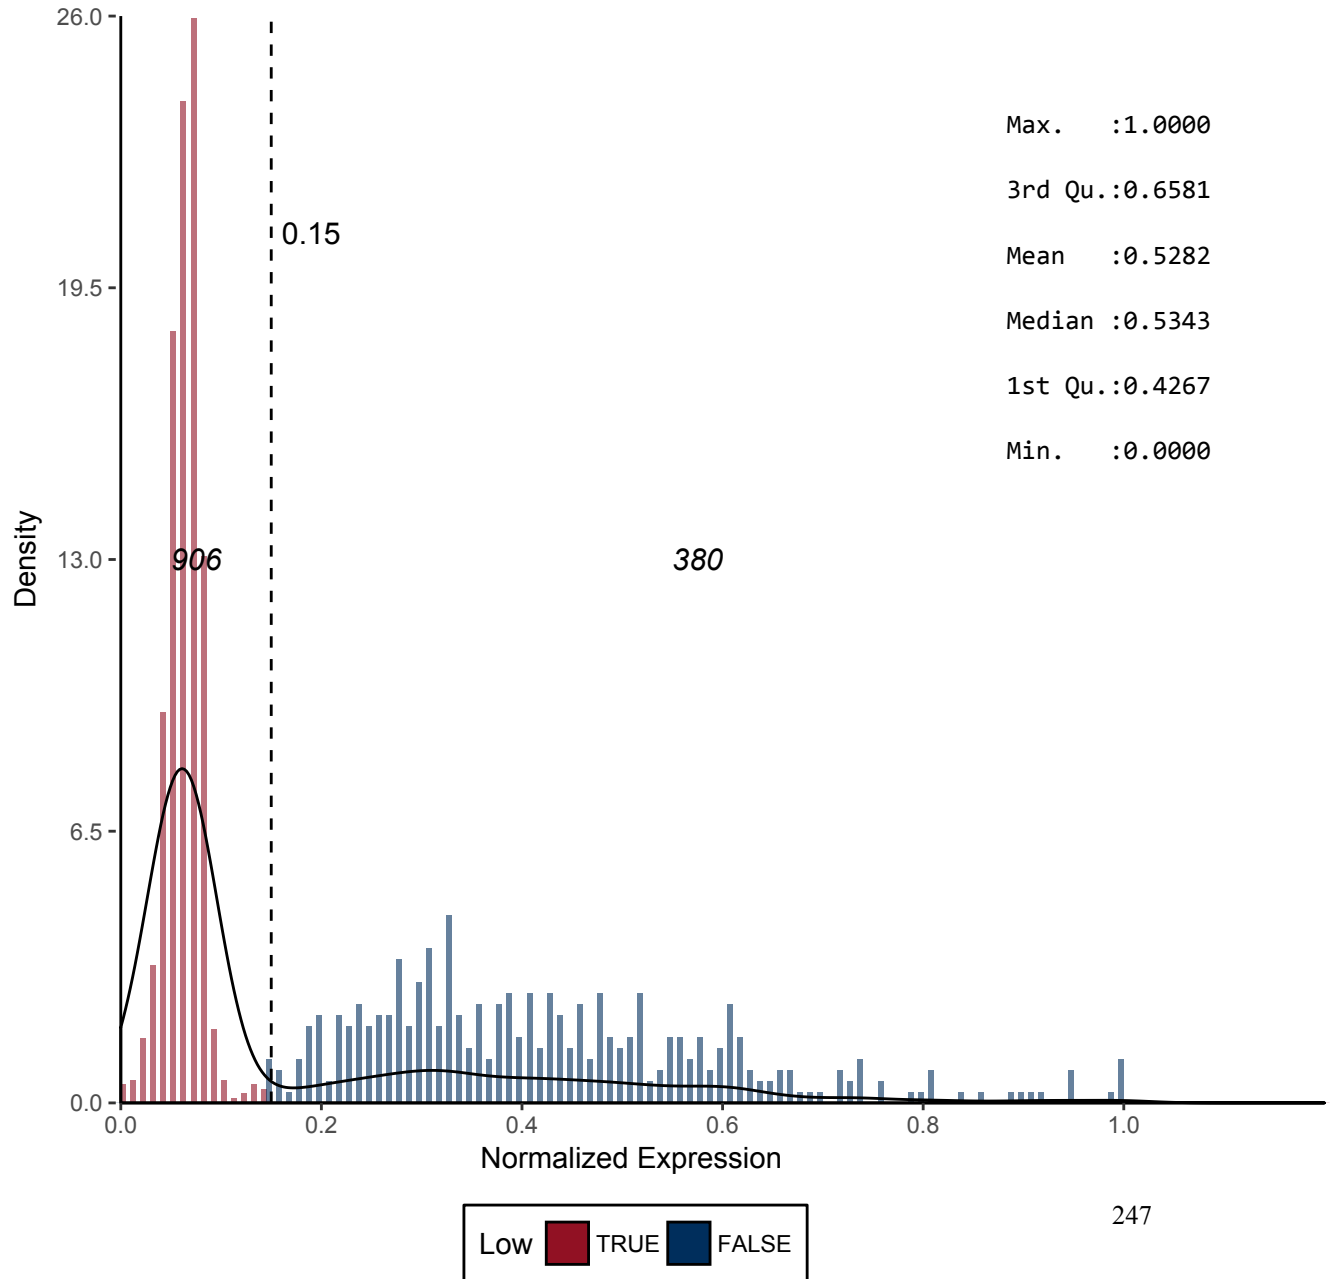

Figure 231 - CD221

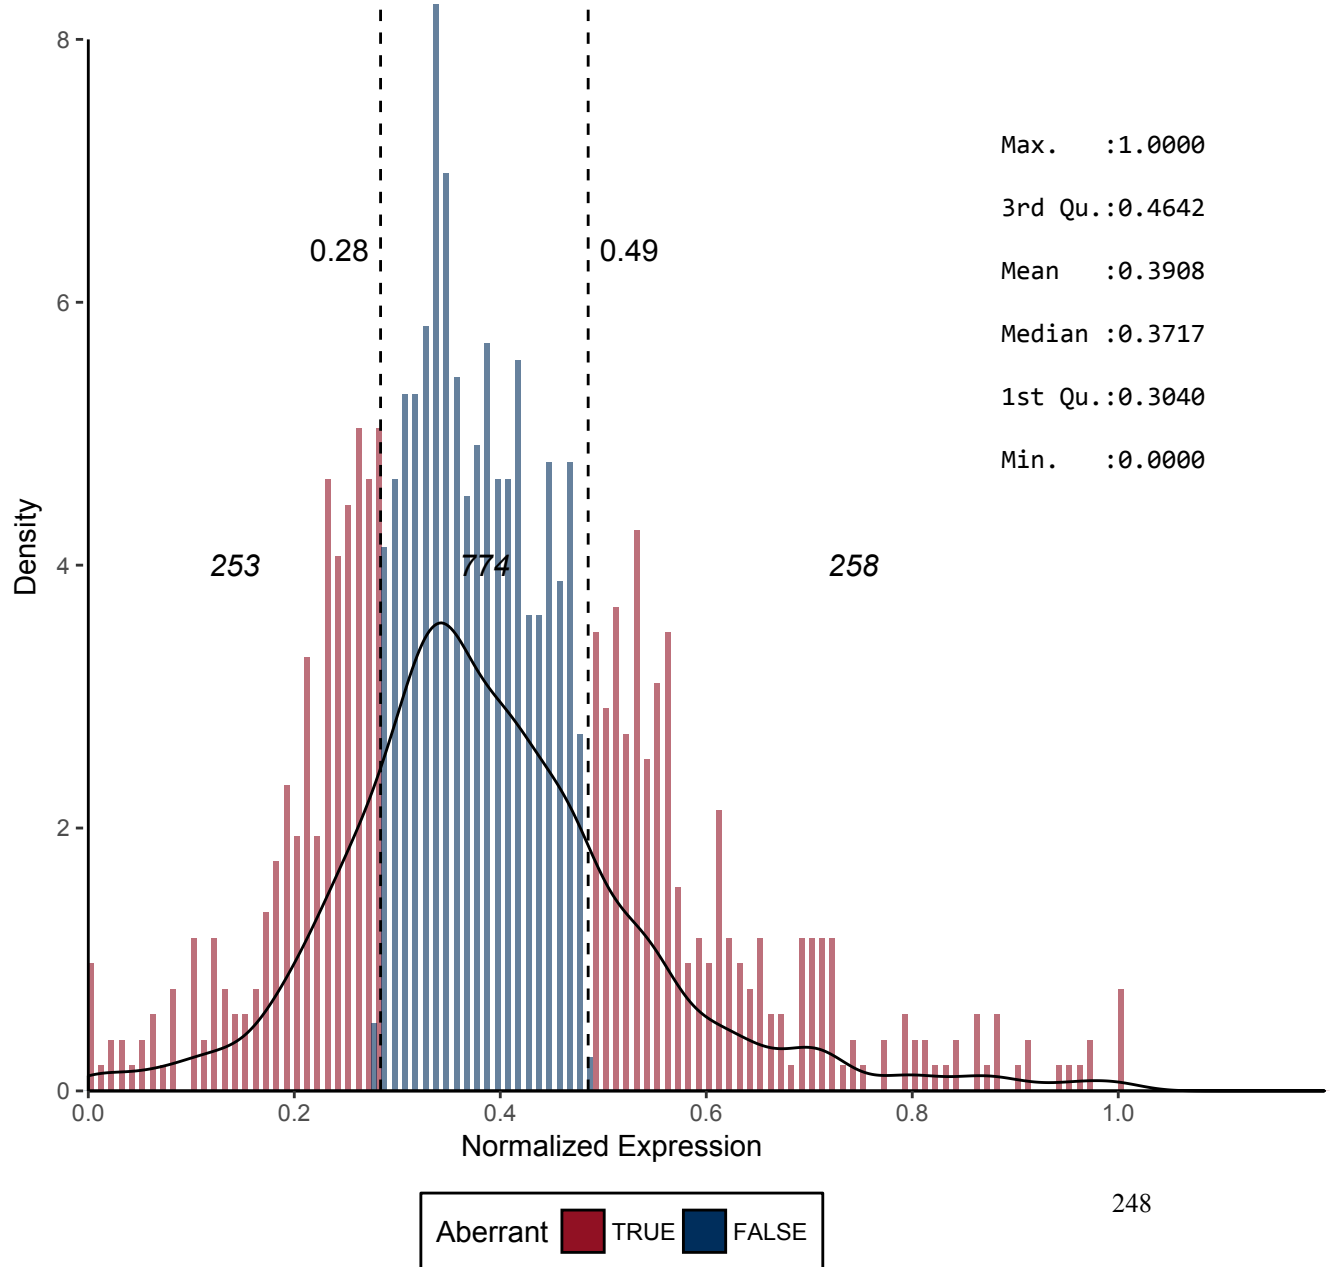



Figure 232 - CD222

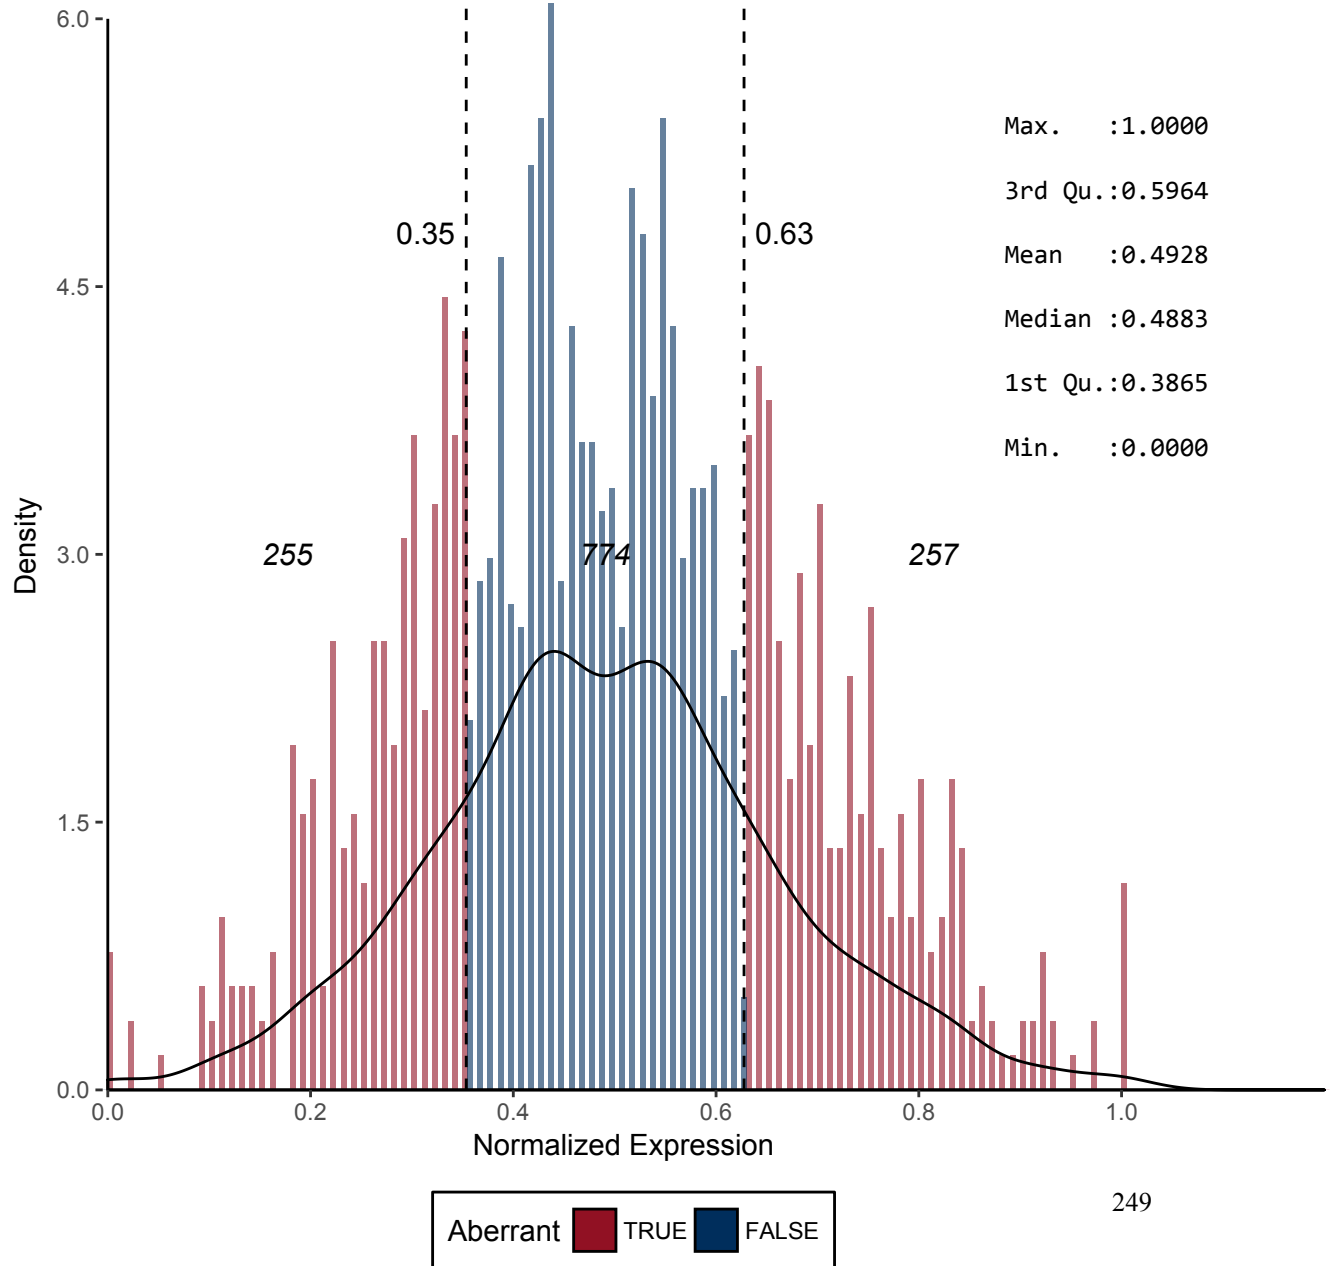

Figure 233 - CD223

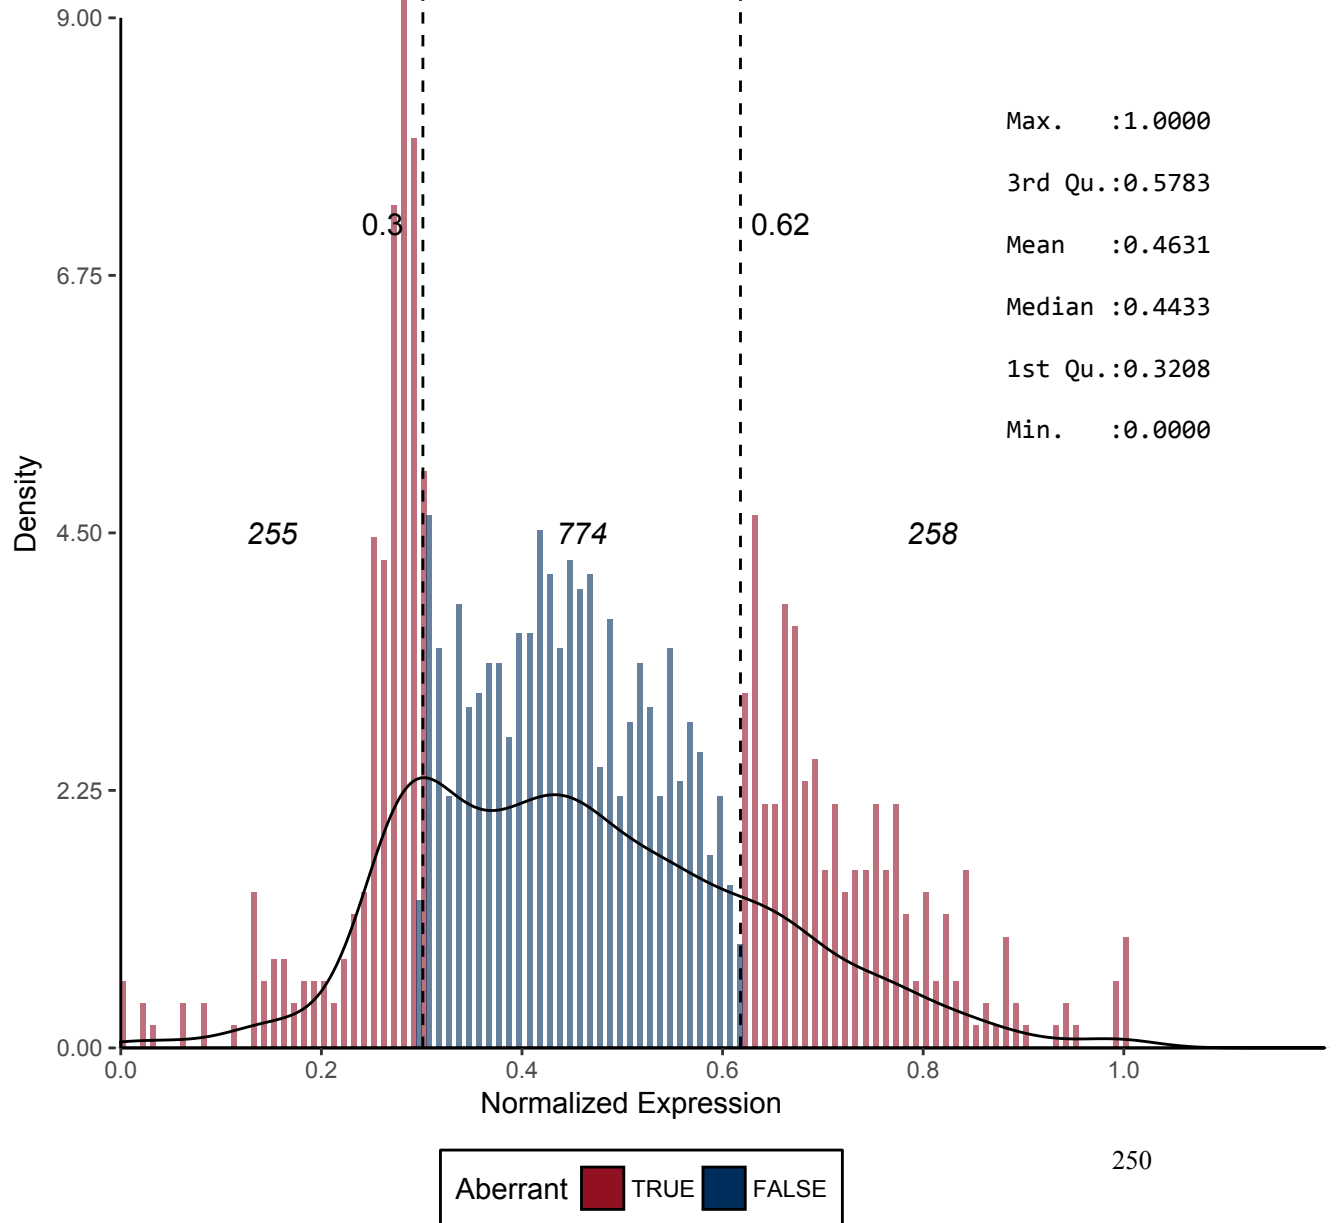

Figure 234 - CD225\*

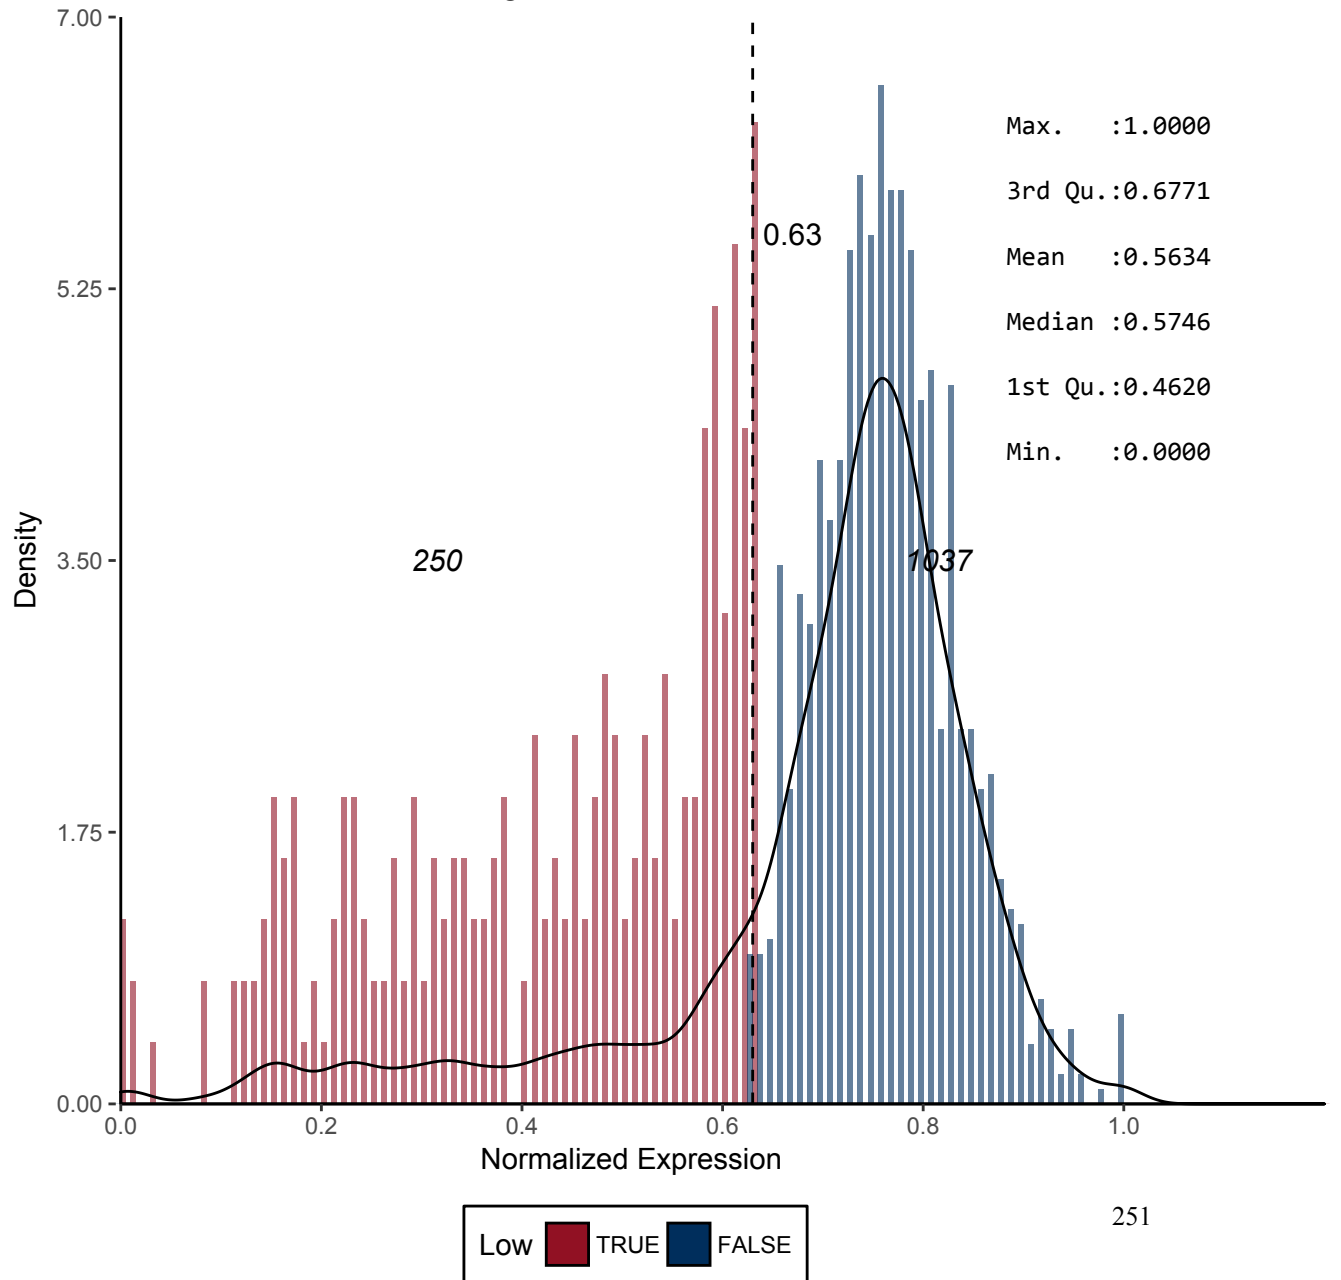

Figure 235 - CD226

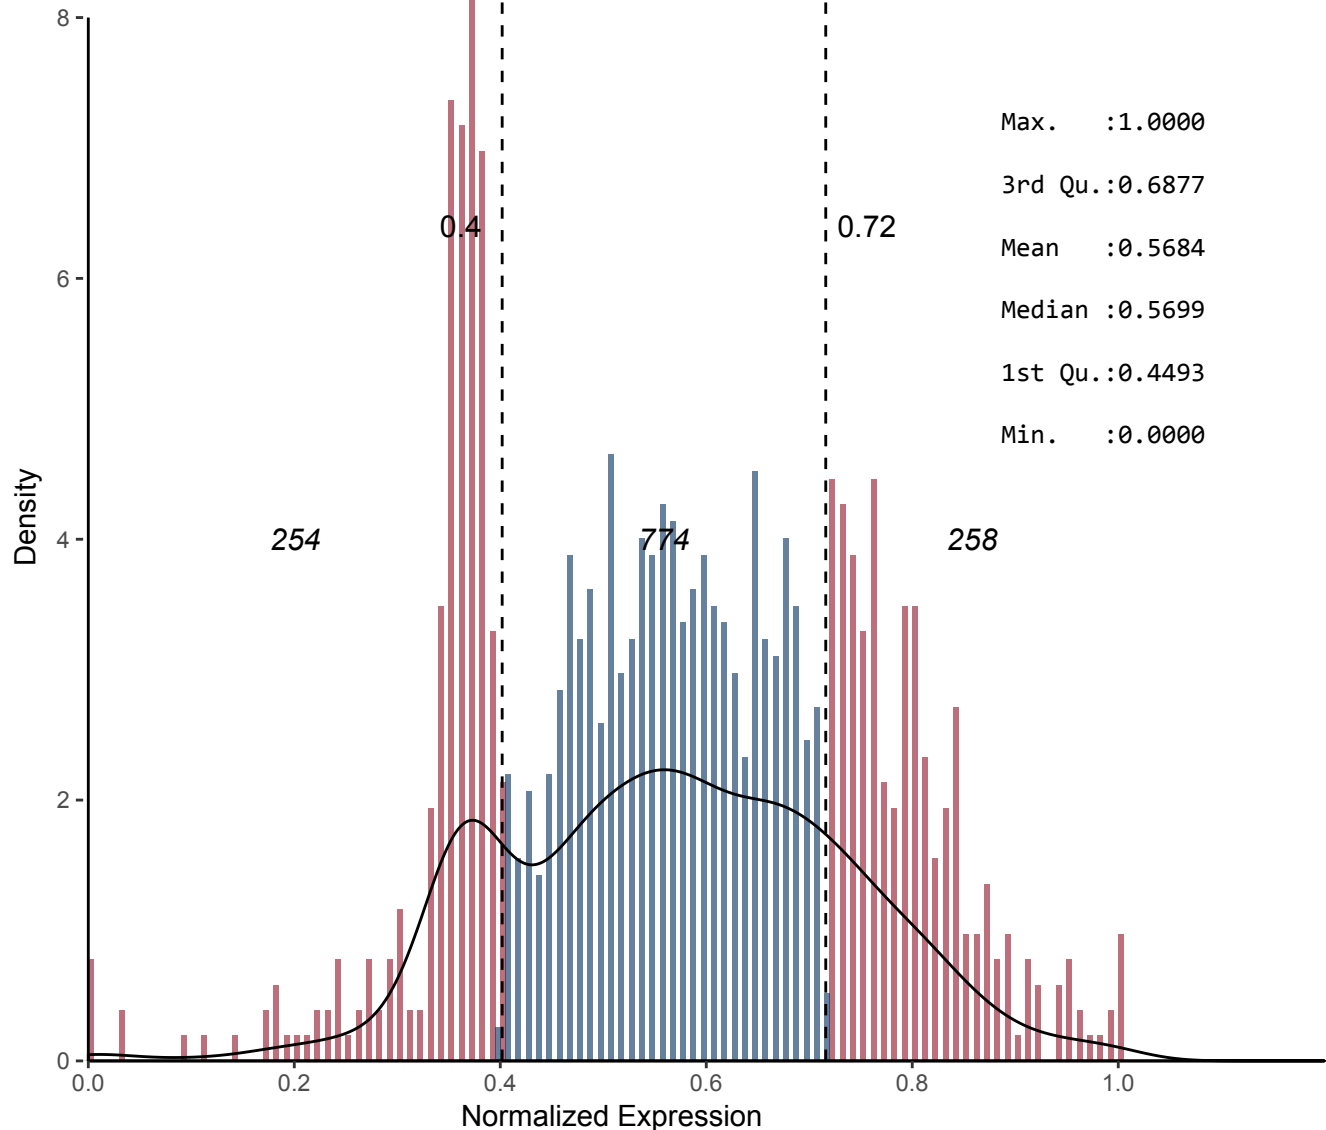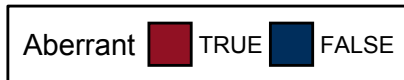

252

Figure 236 - CD227

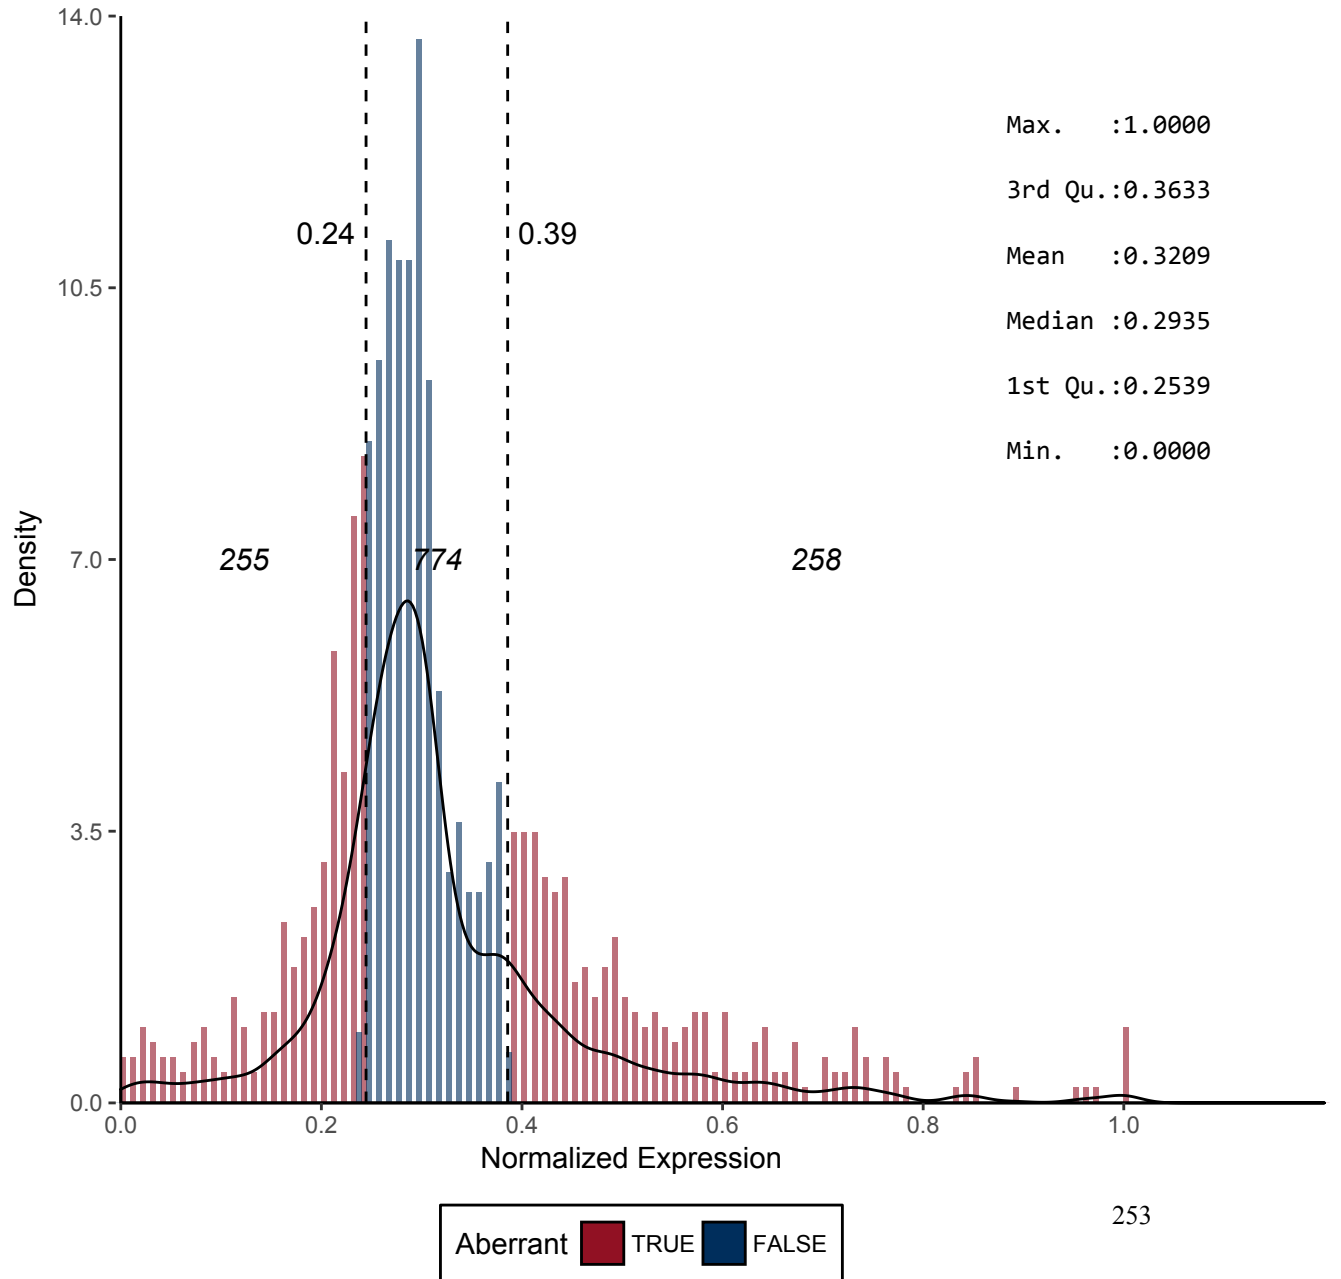

Figure 237 - CD228\*

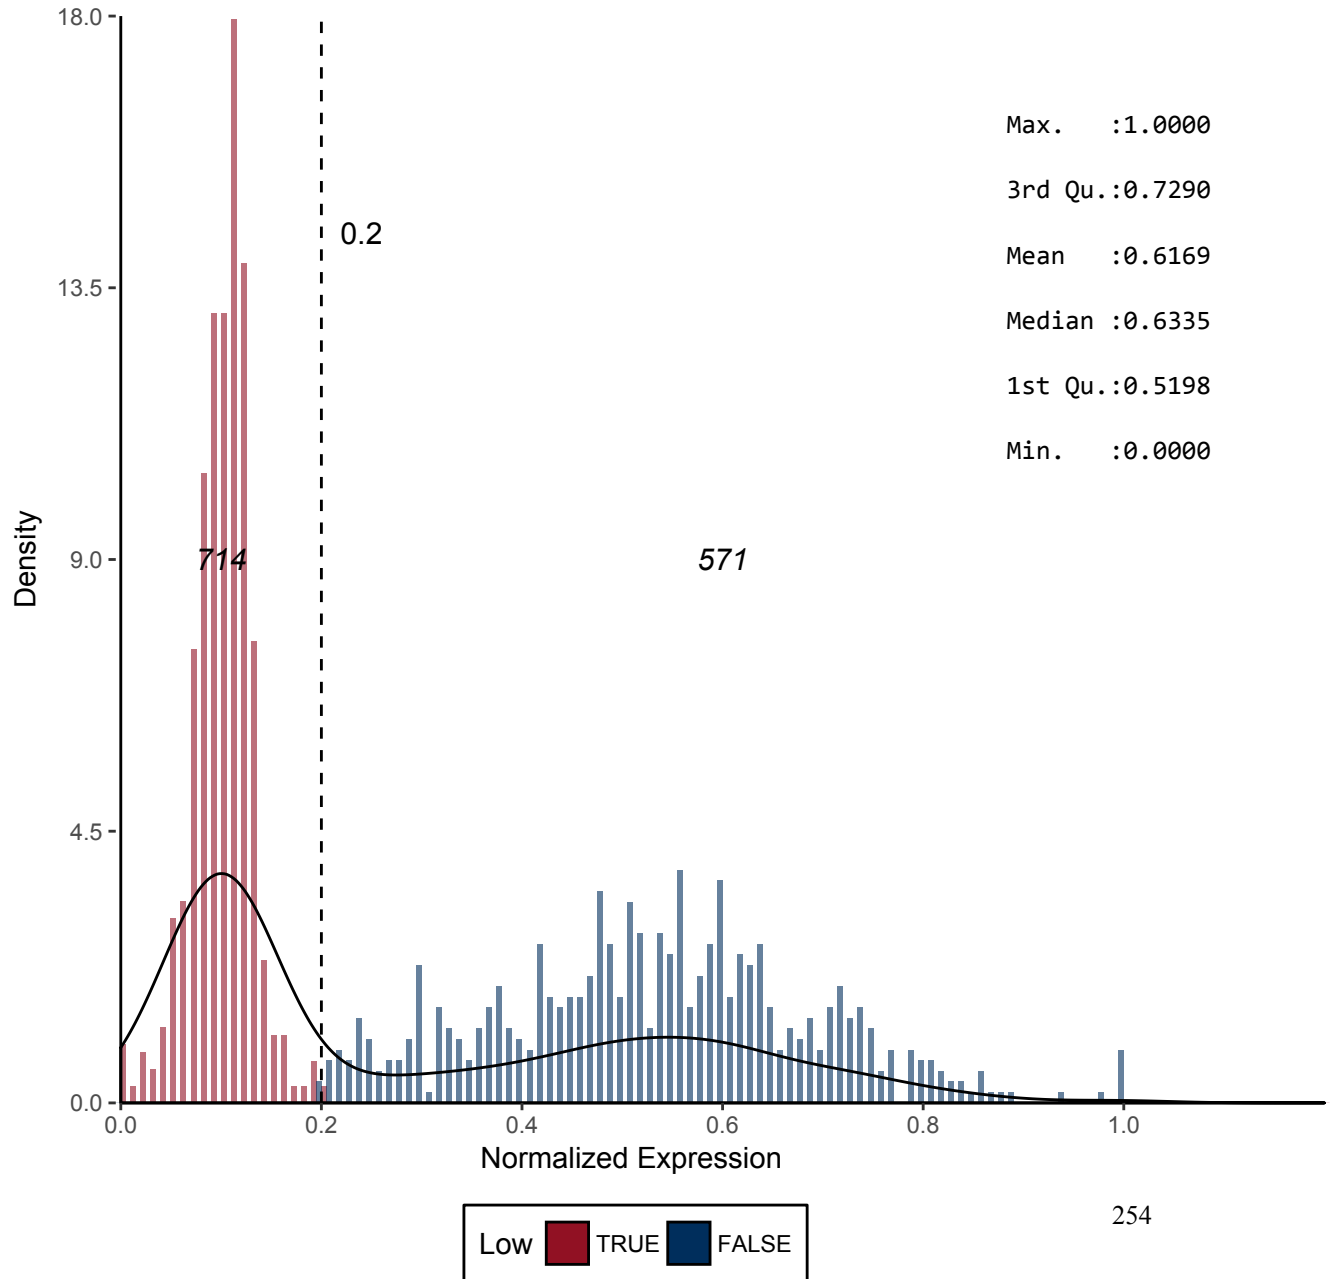

Figure 238 - CD229

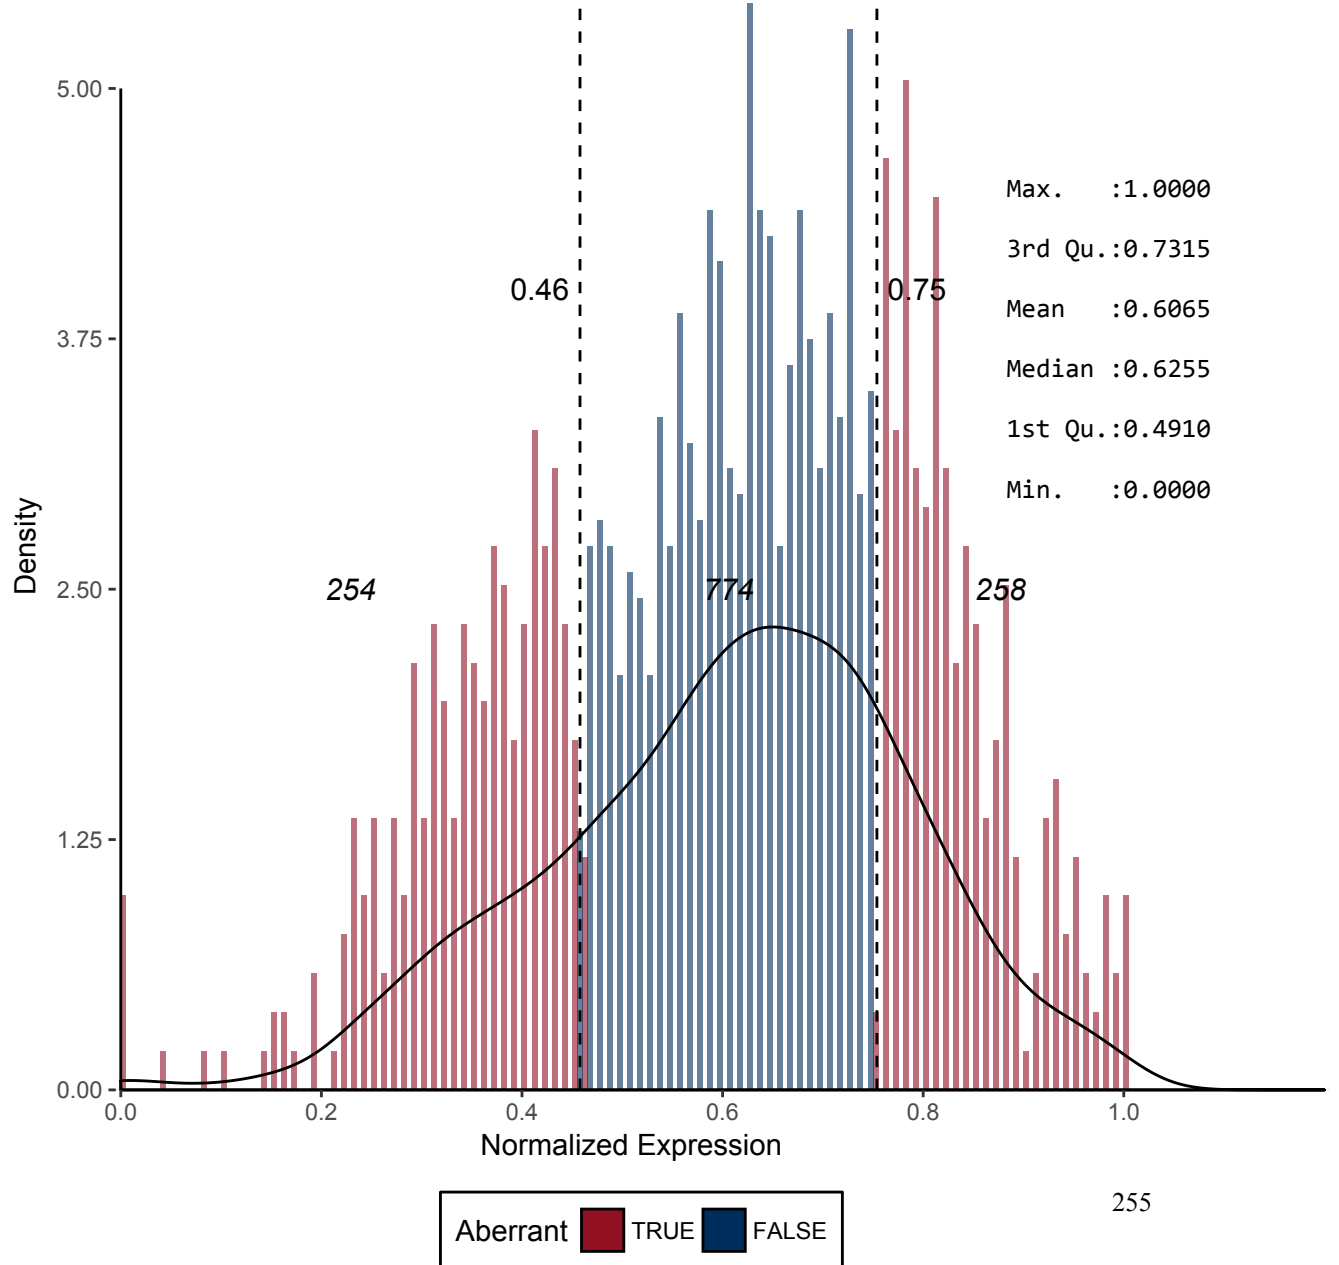

Figure 239 - CD230

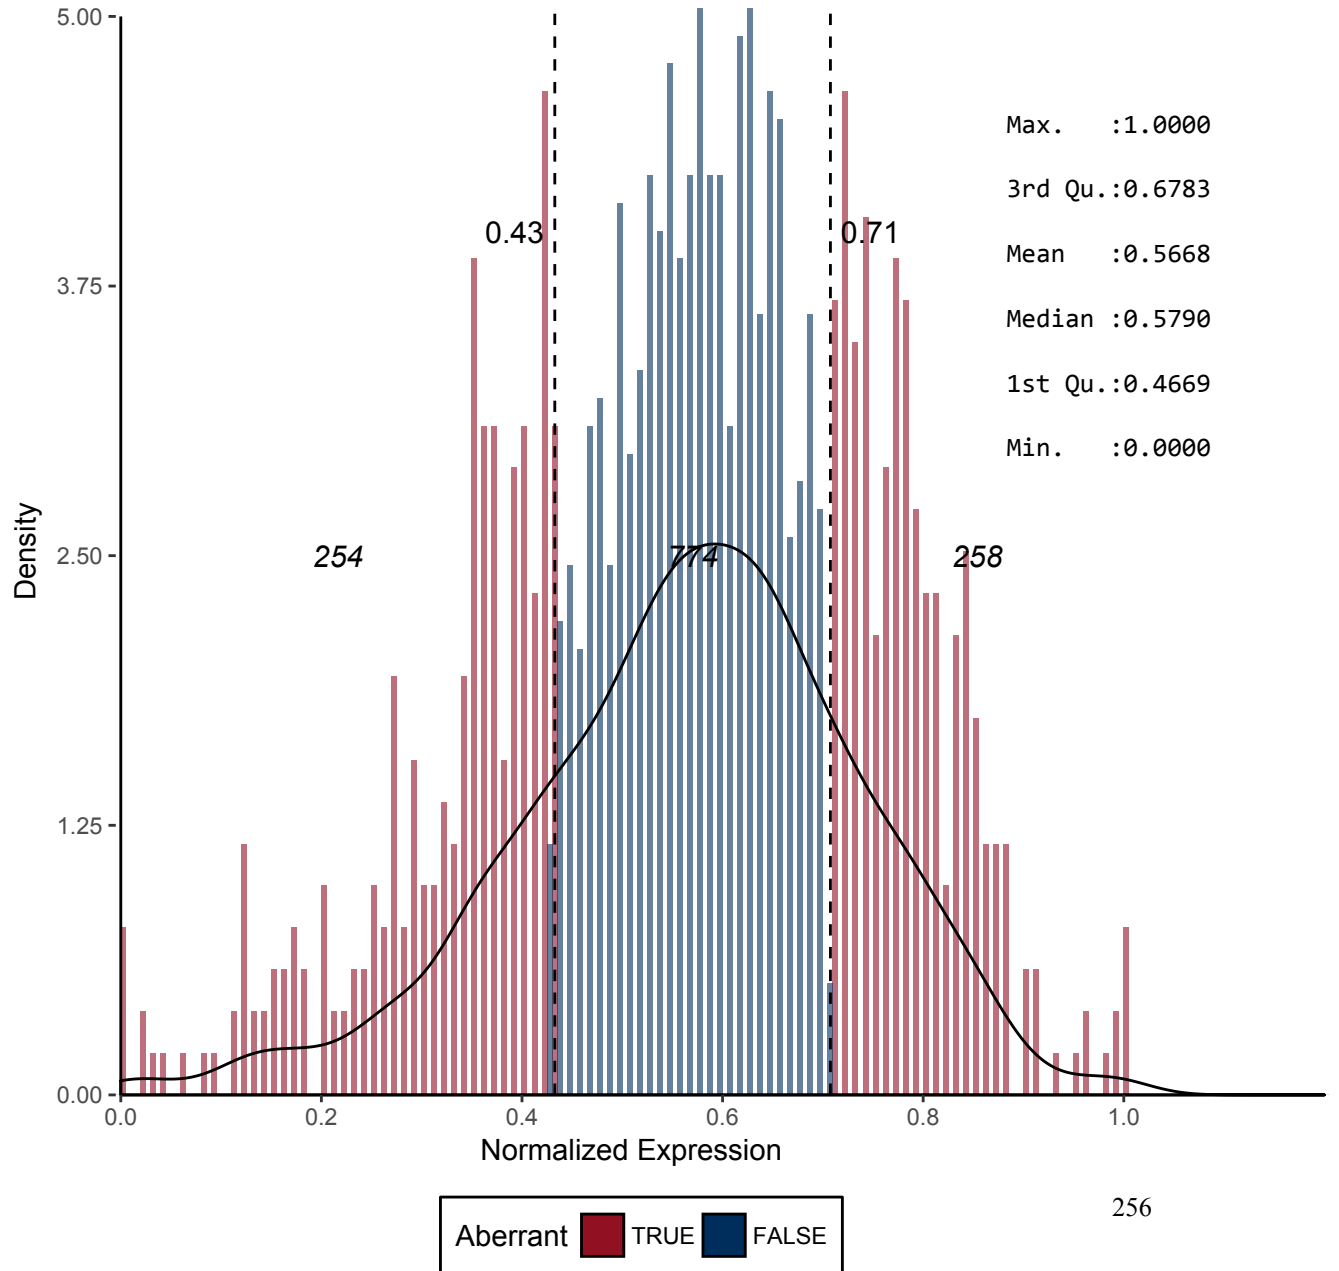



Figure 240 - CD231\*

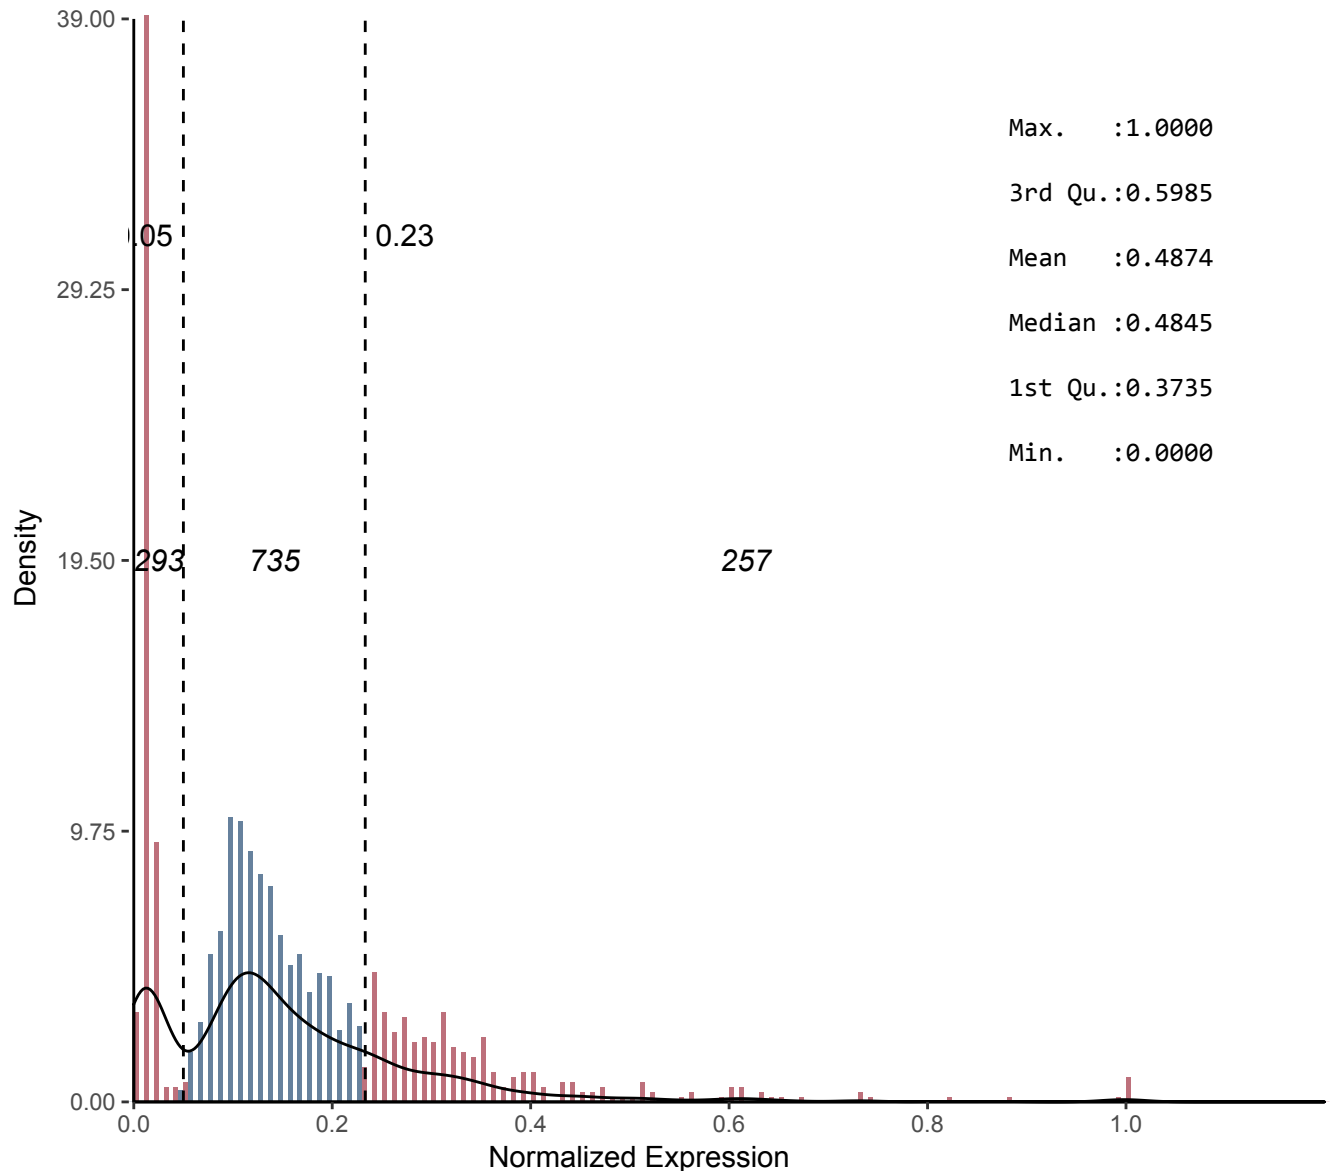

Aberrant ■ TRUE ■ FALSE

257

Figure 241 - CD232

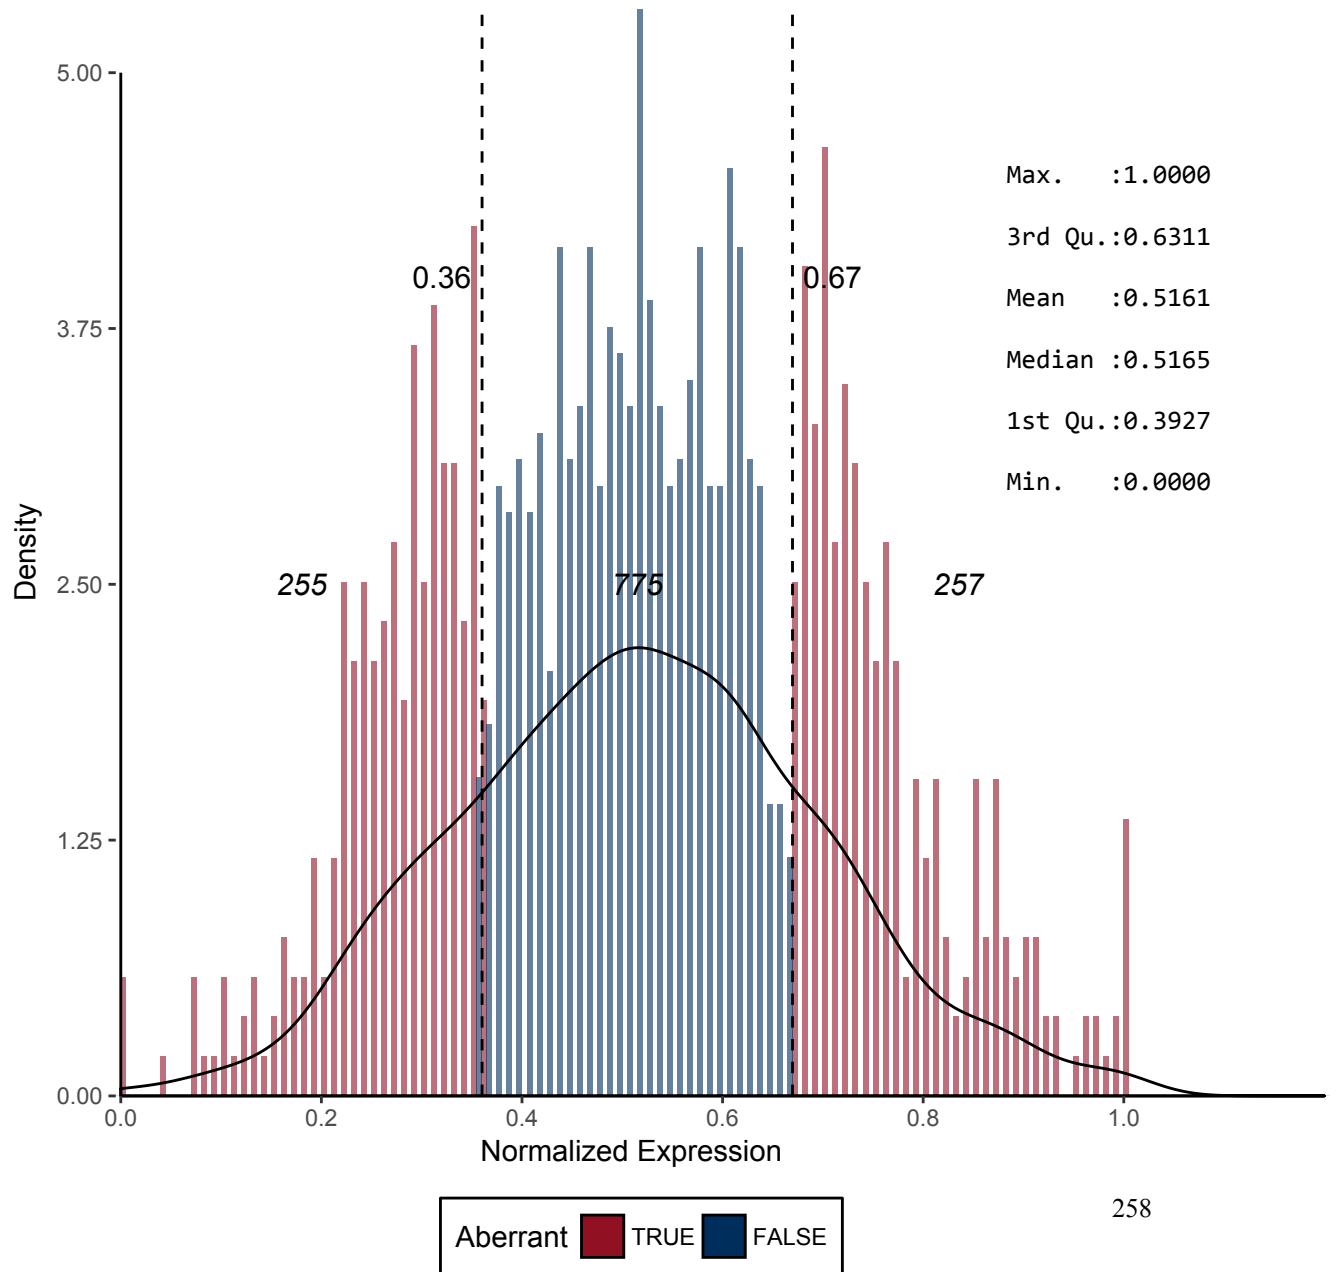

Figure 242 - CD233

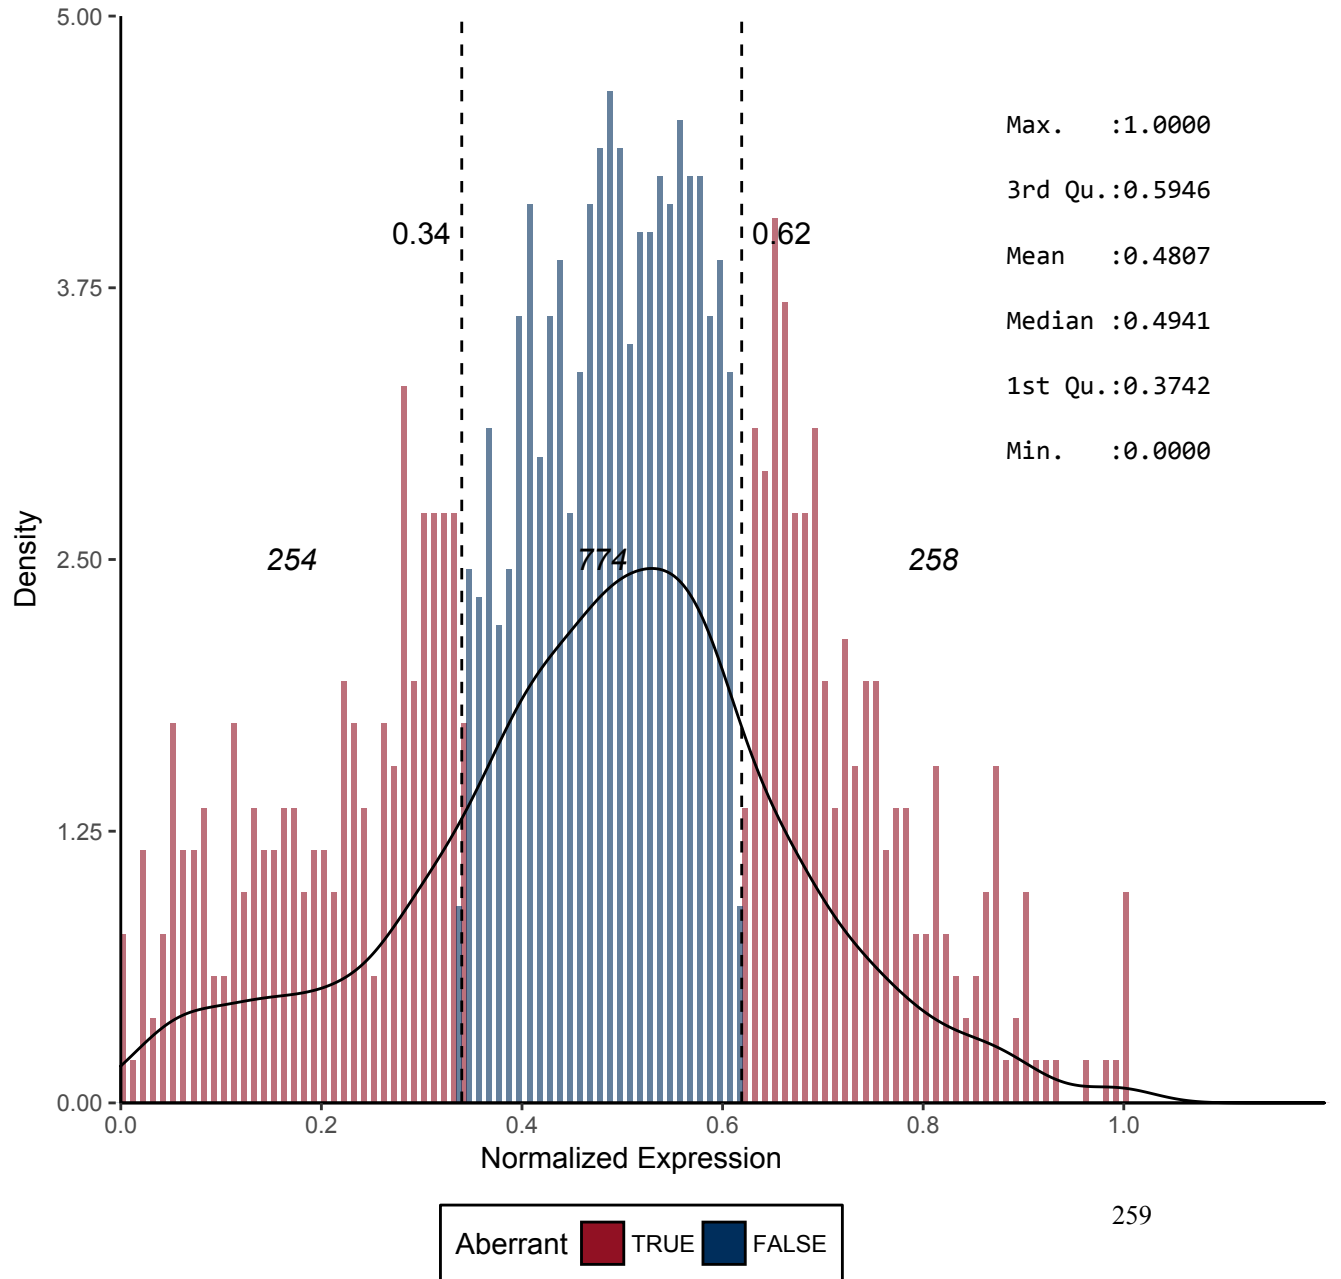

Figure 243 - CD234

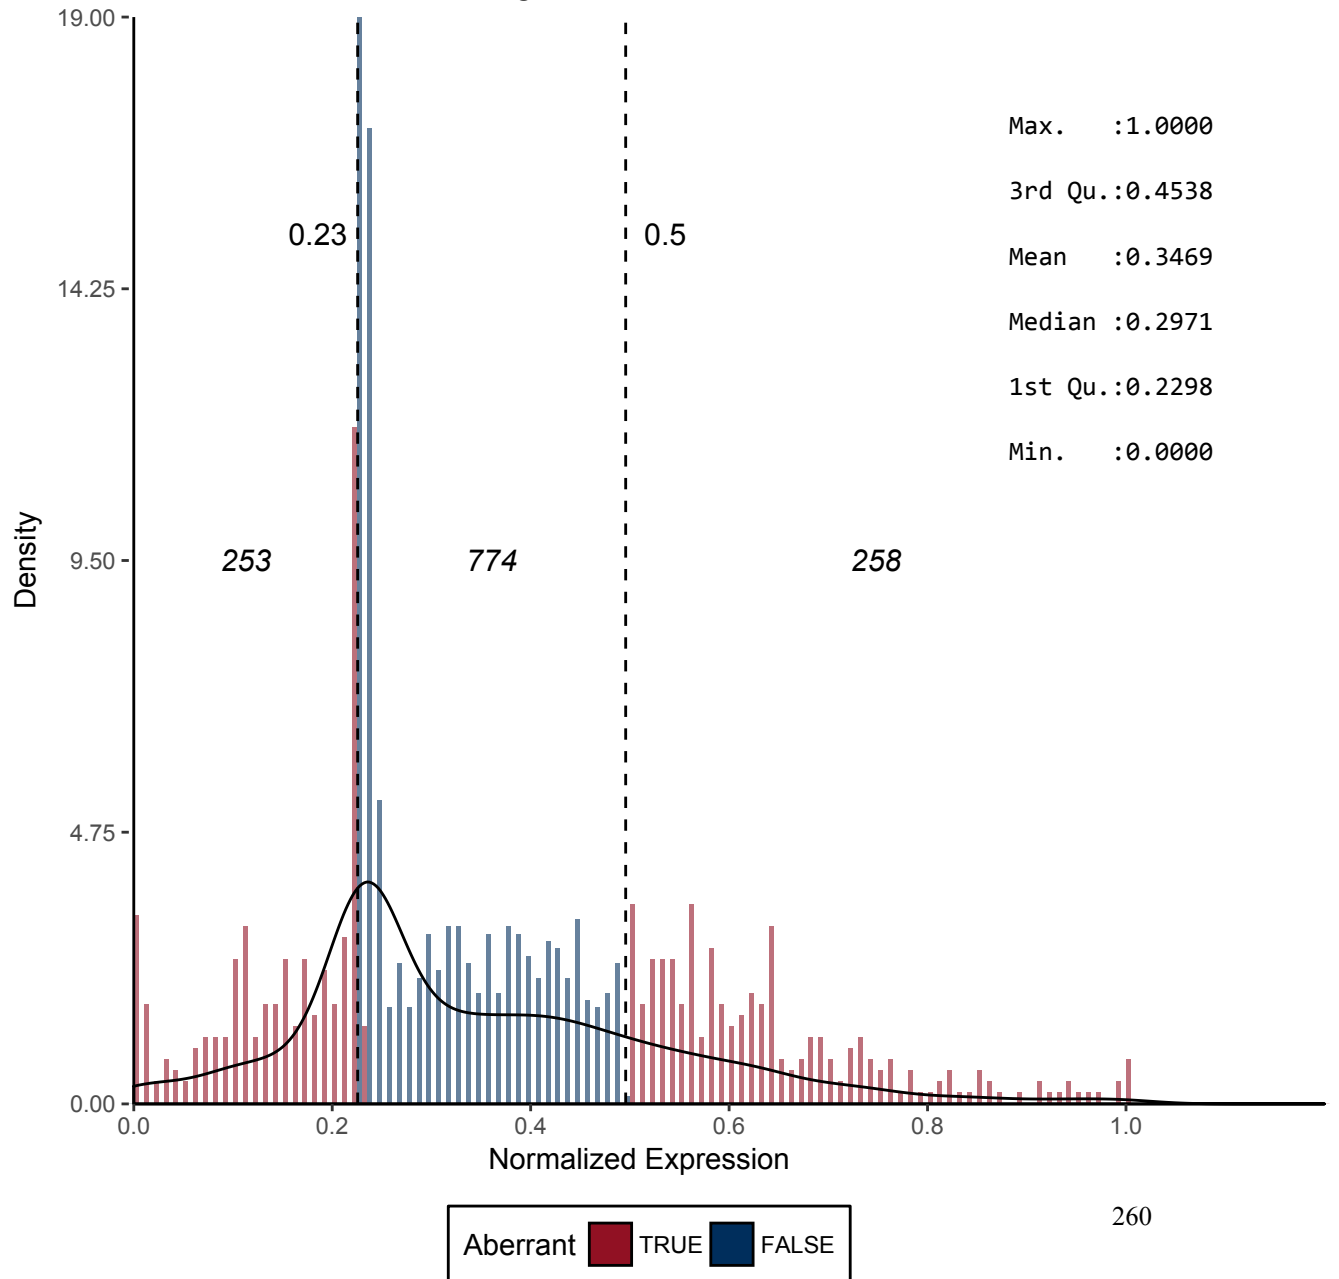

Figure 244 - CD235A\*

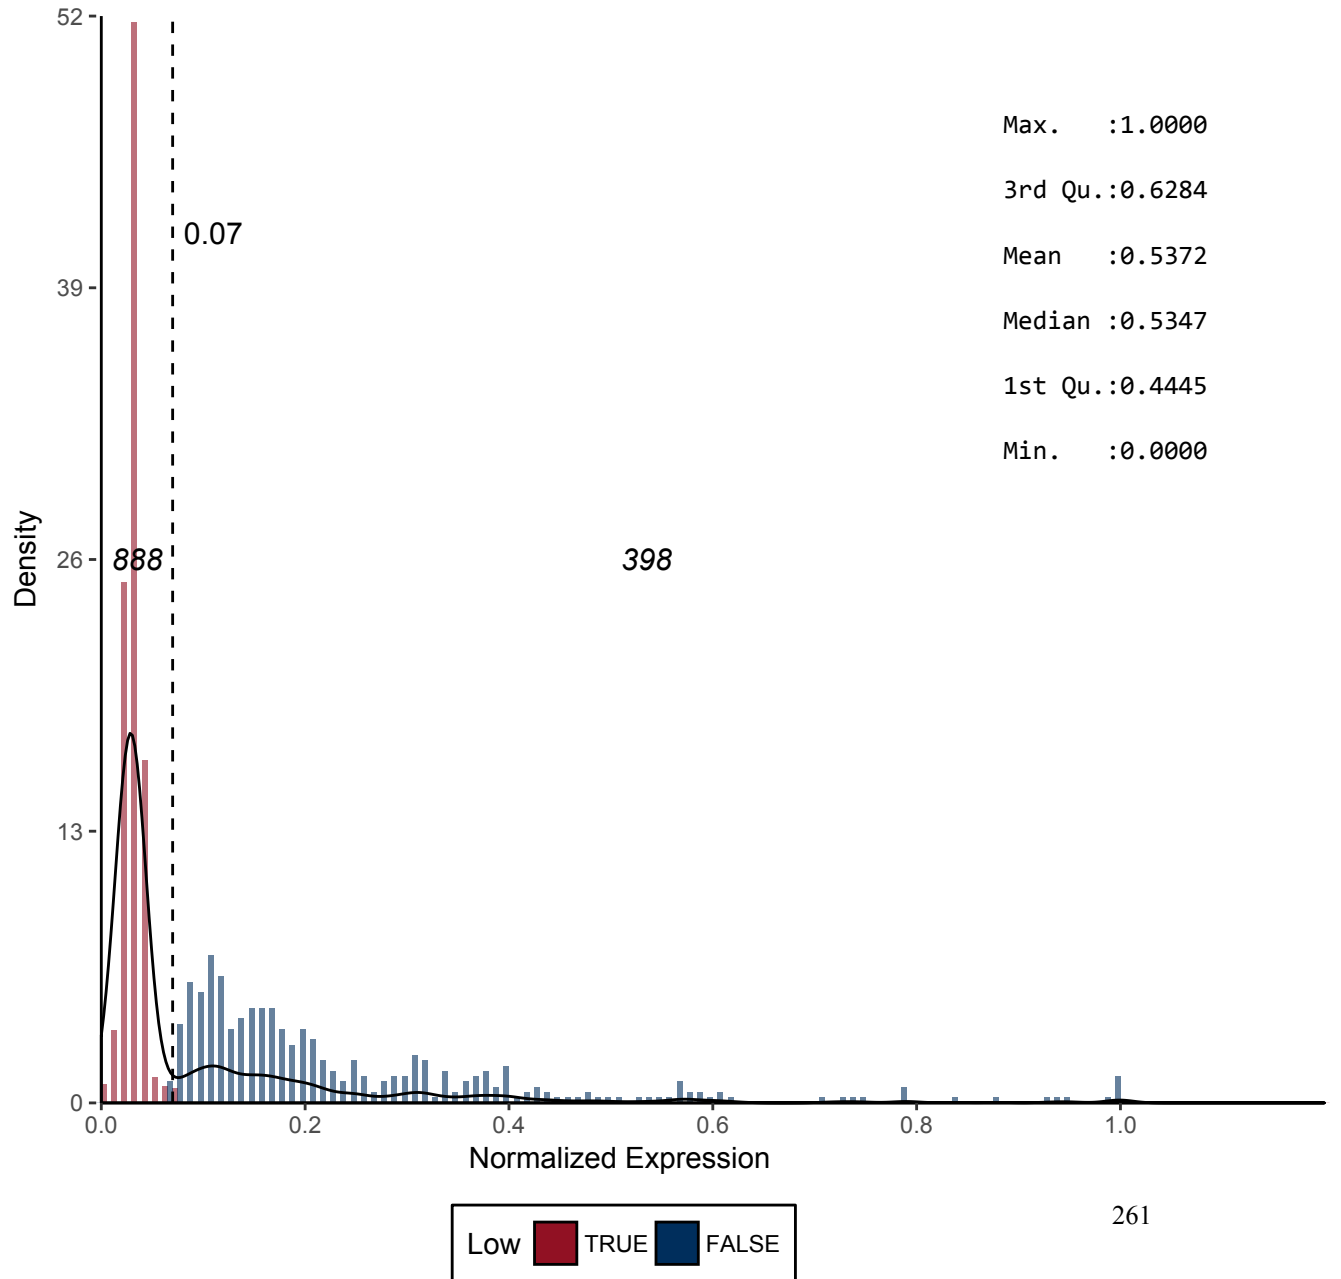

Figure 245 - CD235B

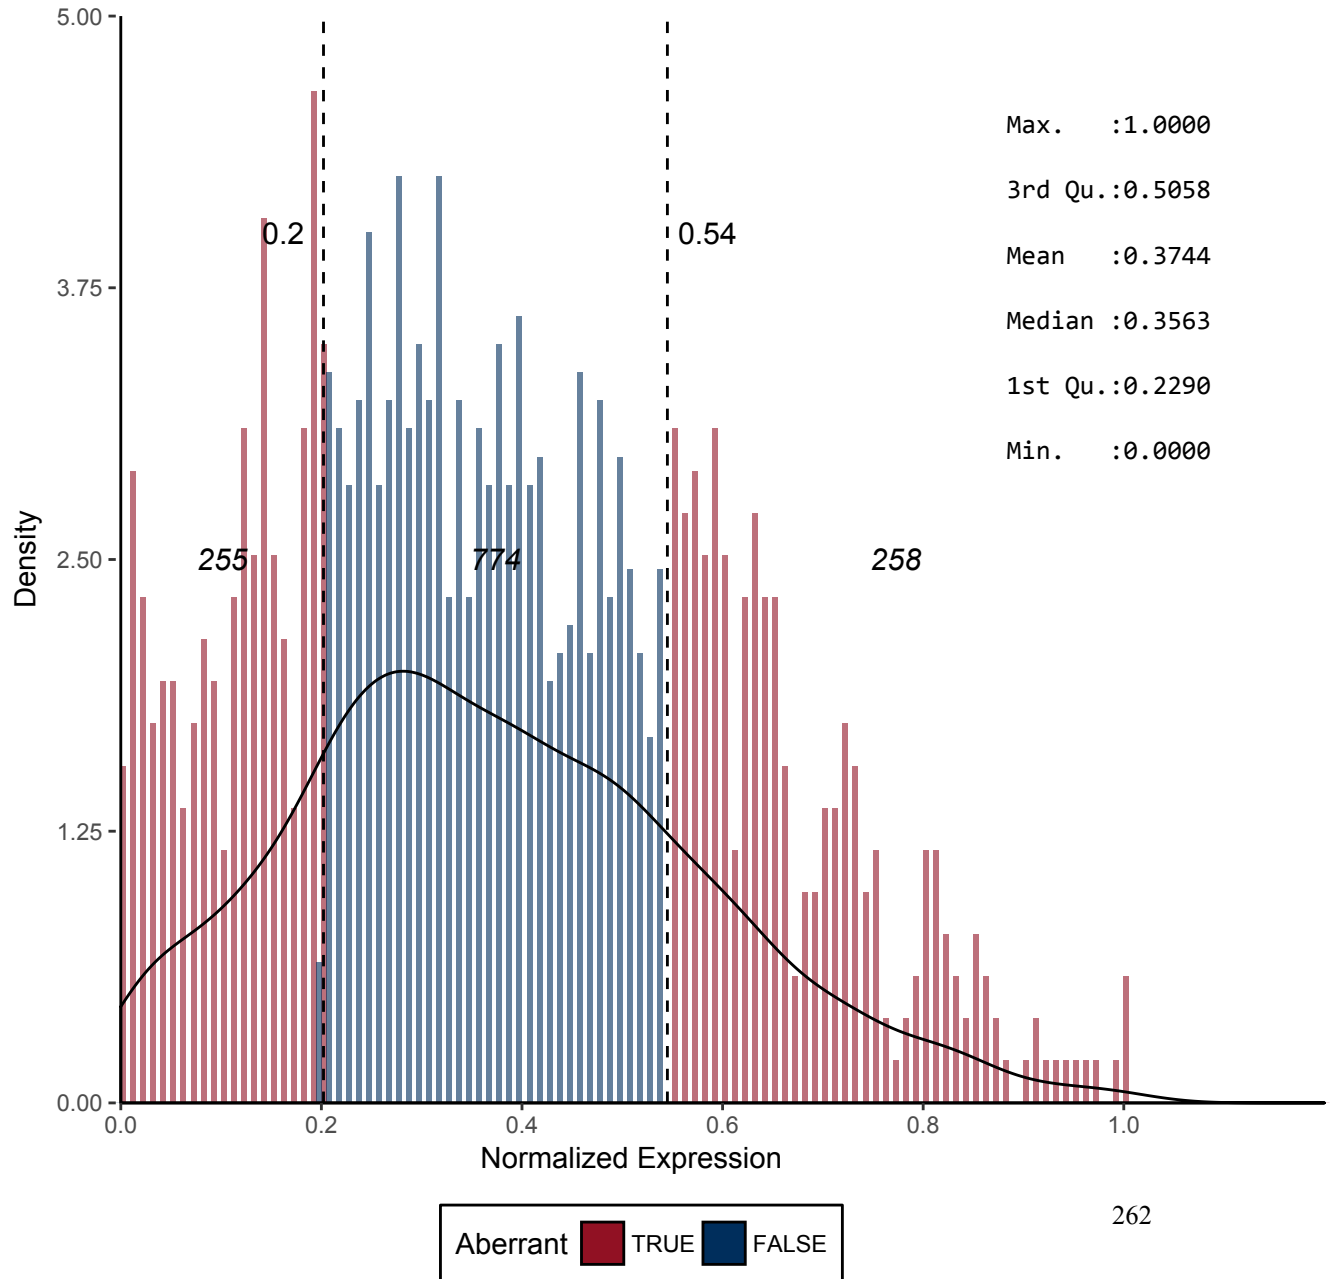

Figure 246 - CD236

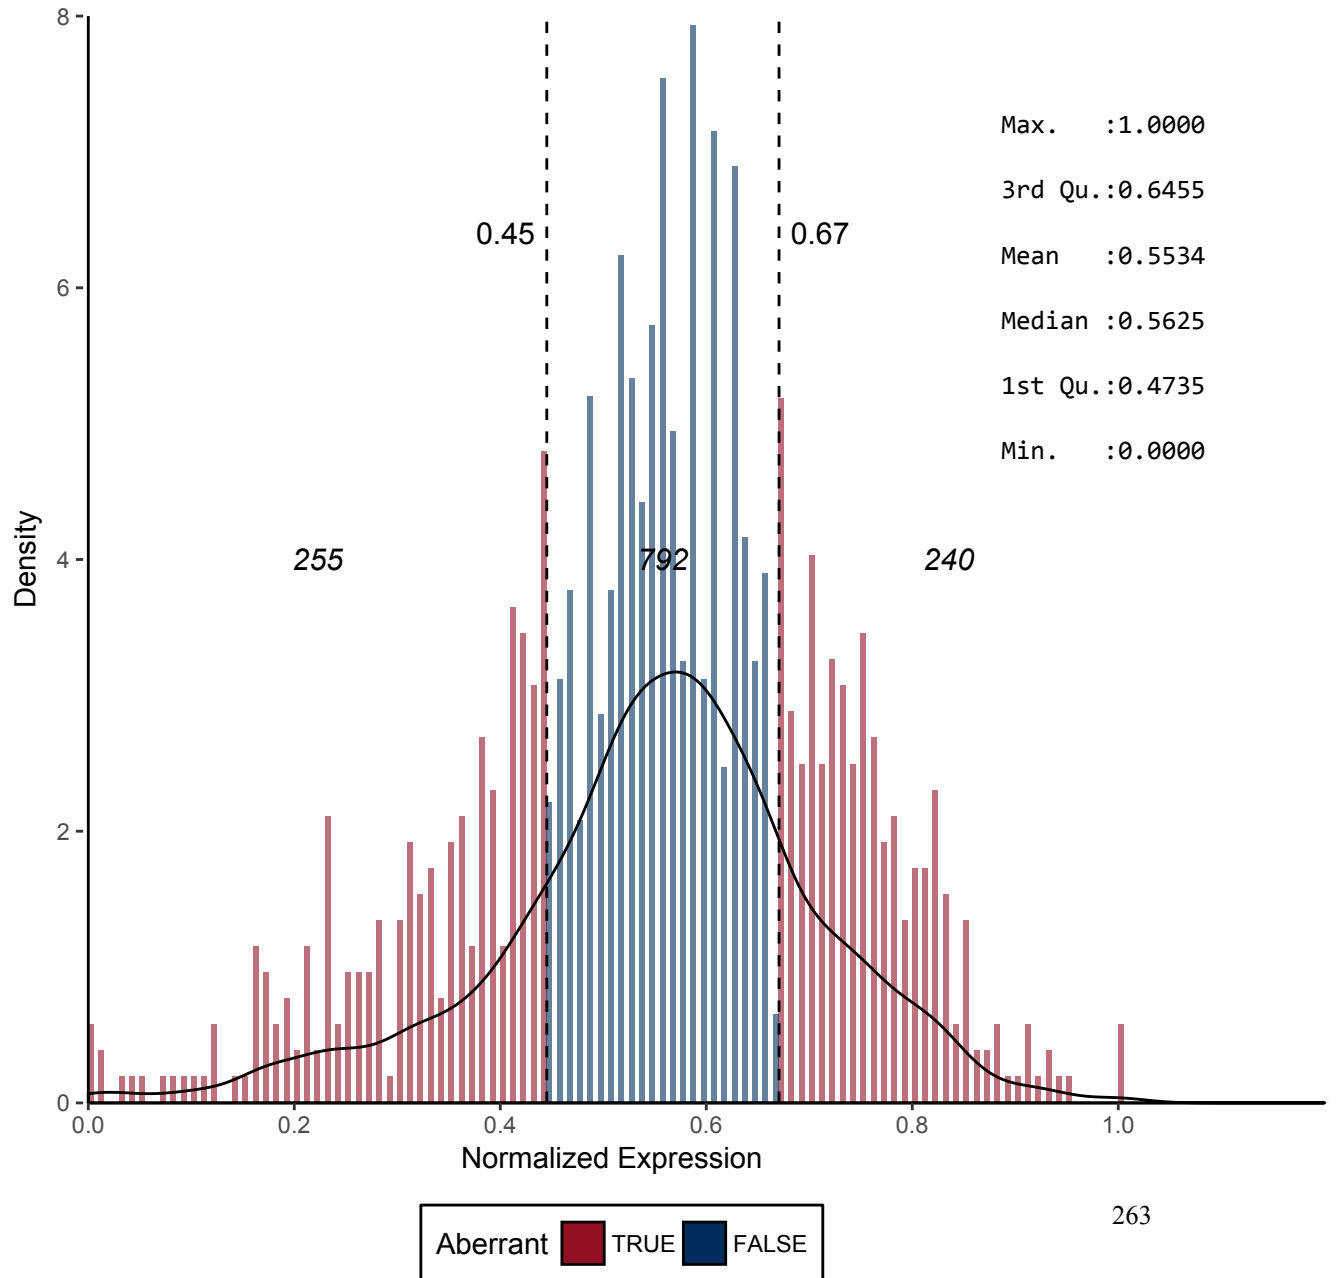

Figure 247 - CD238

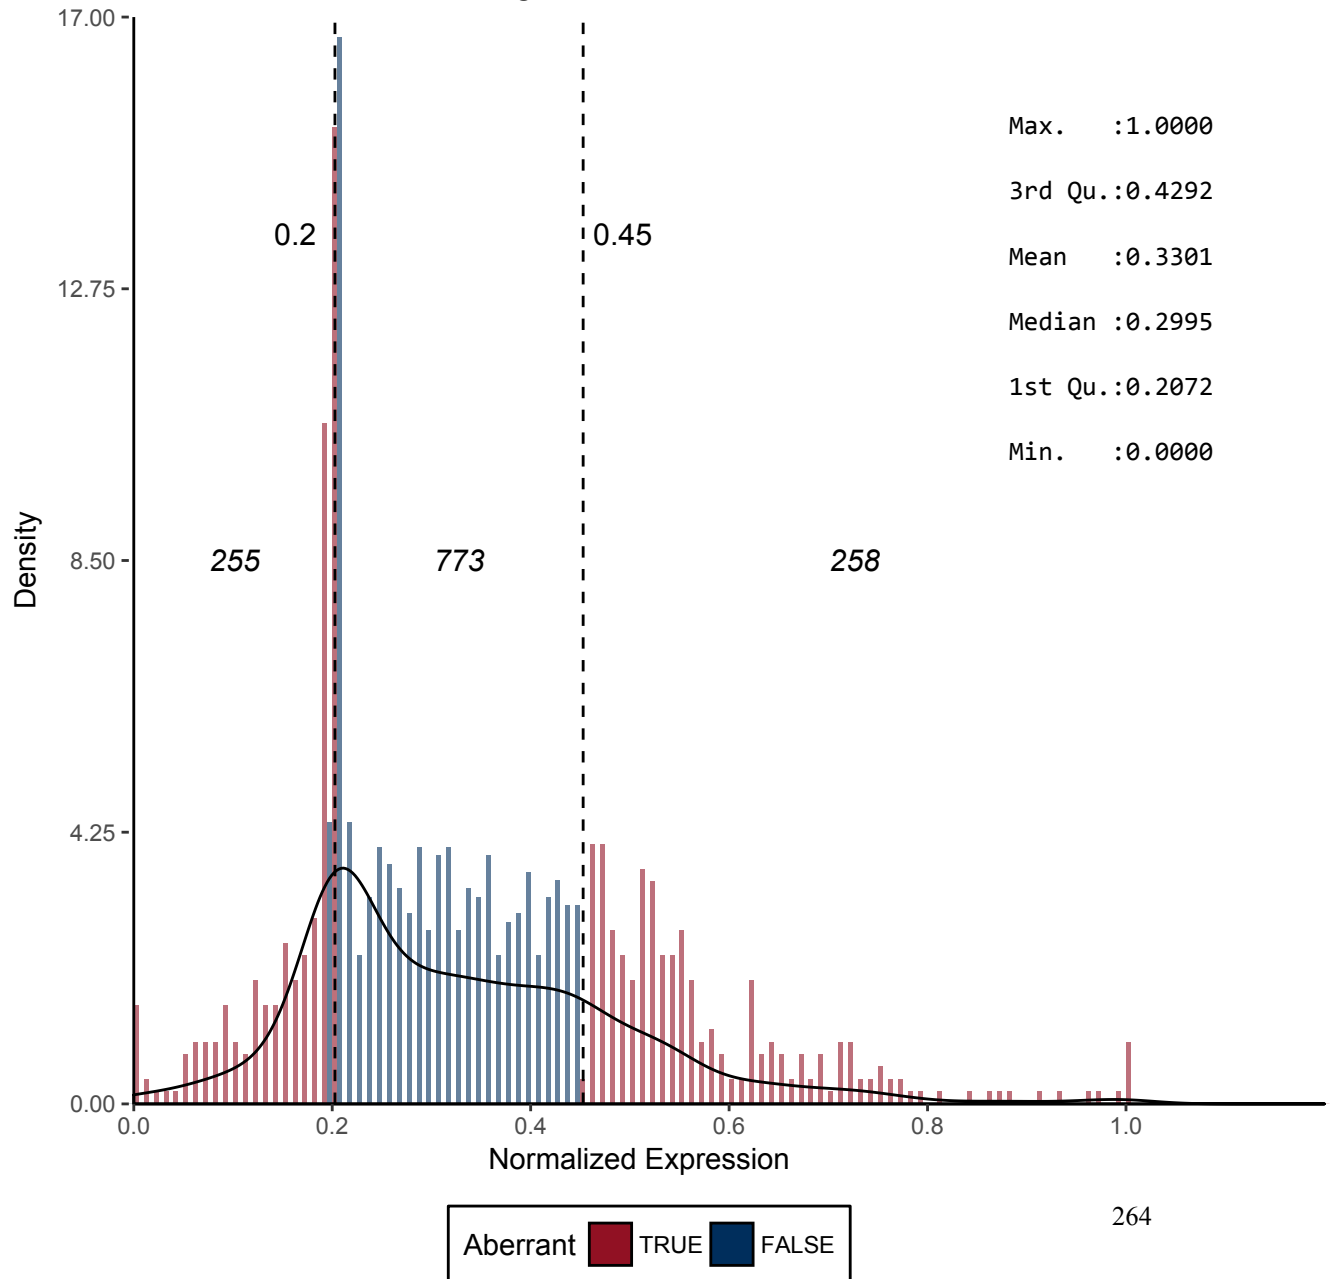



Figure 248 - CD239\*

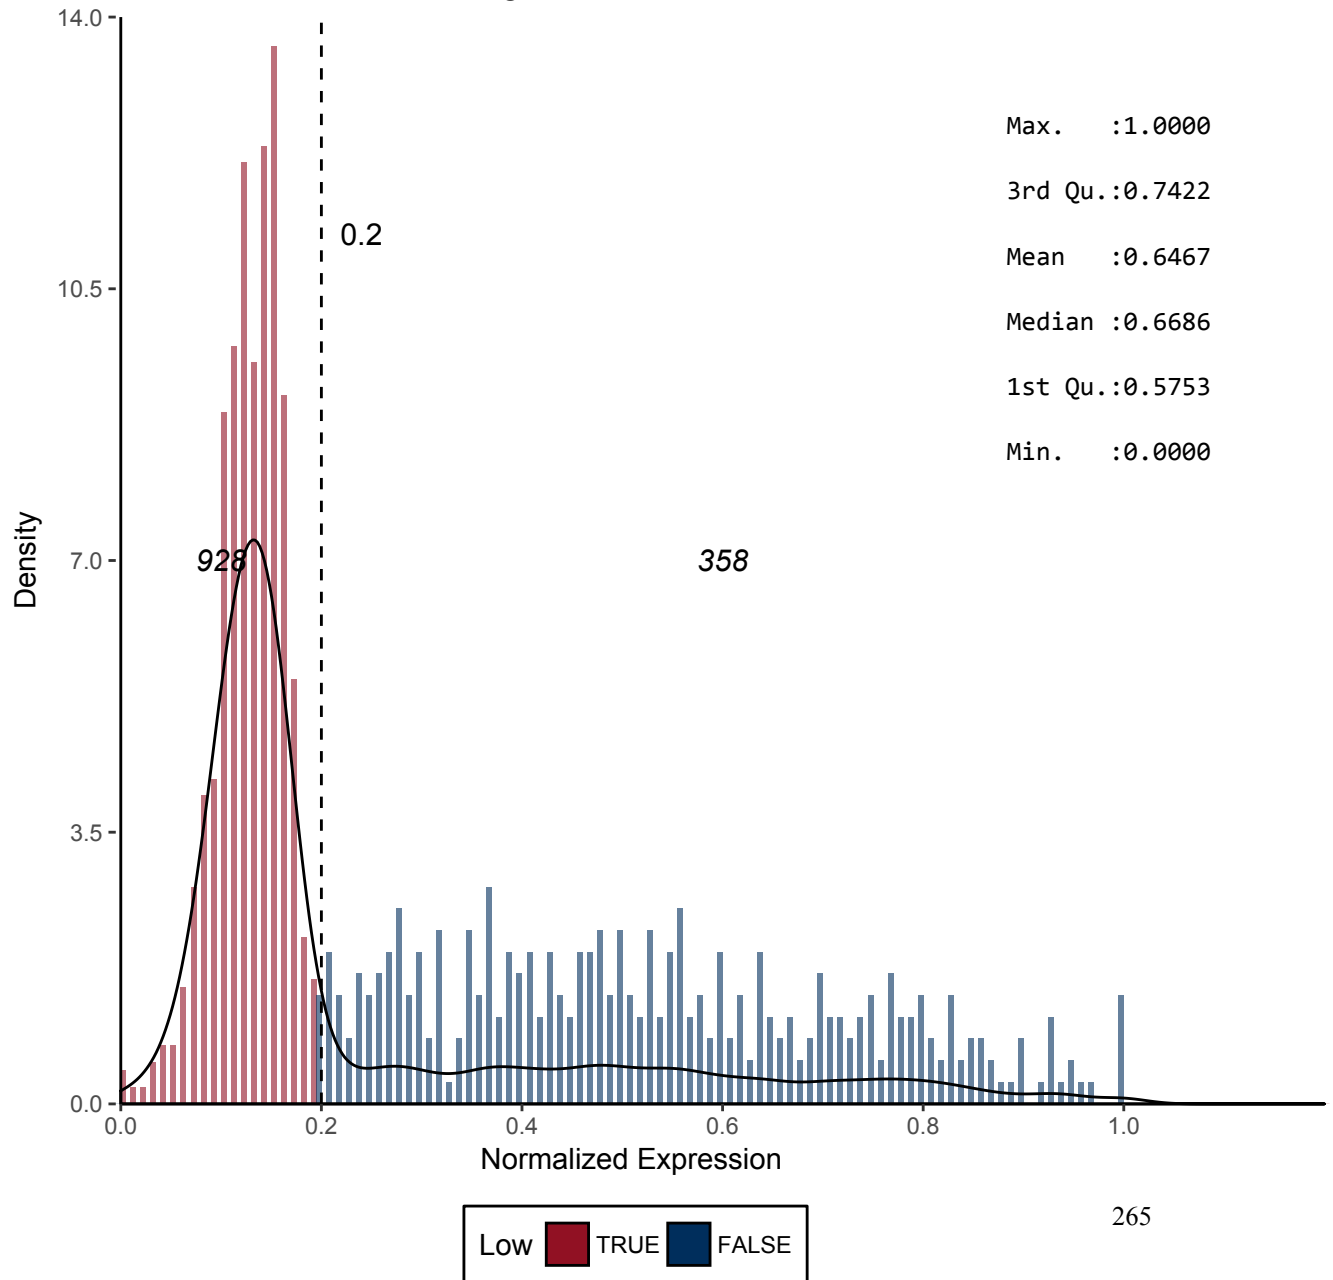

Figure 249 - CD240CE

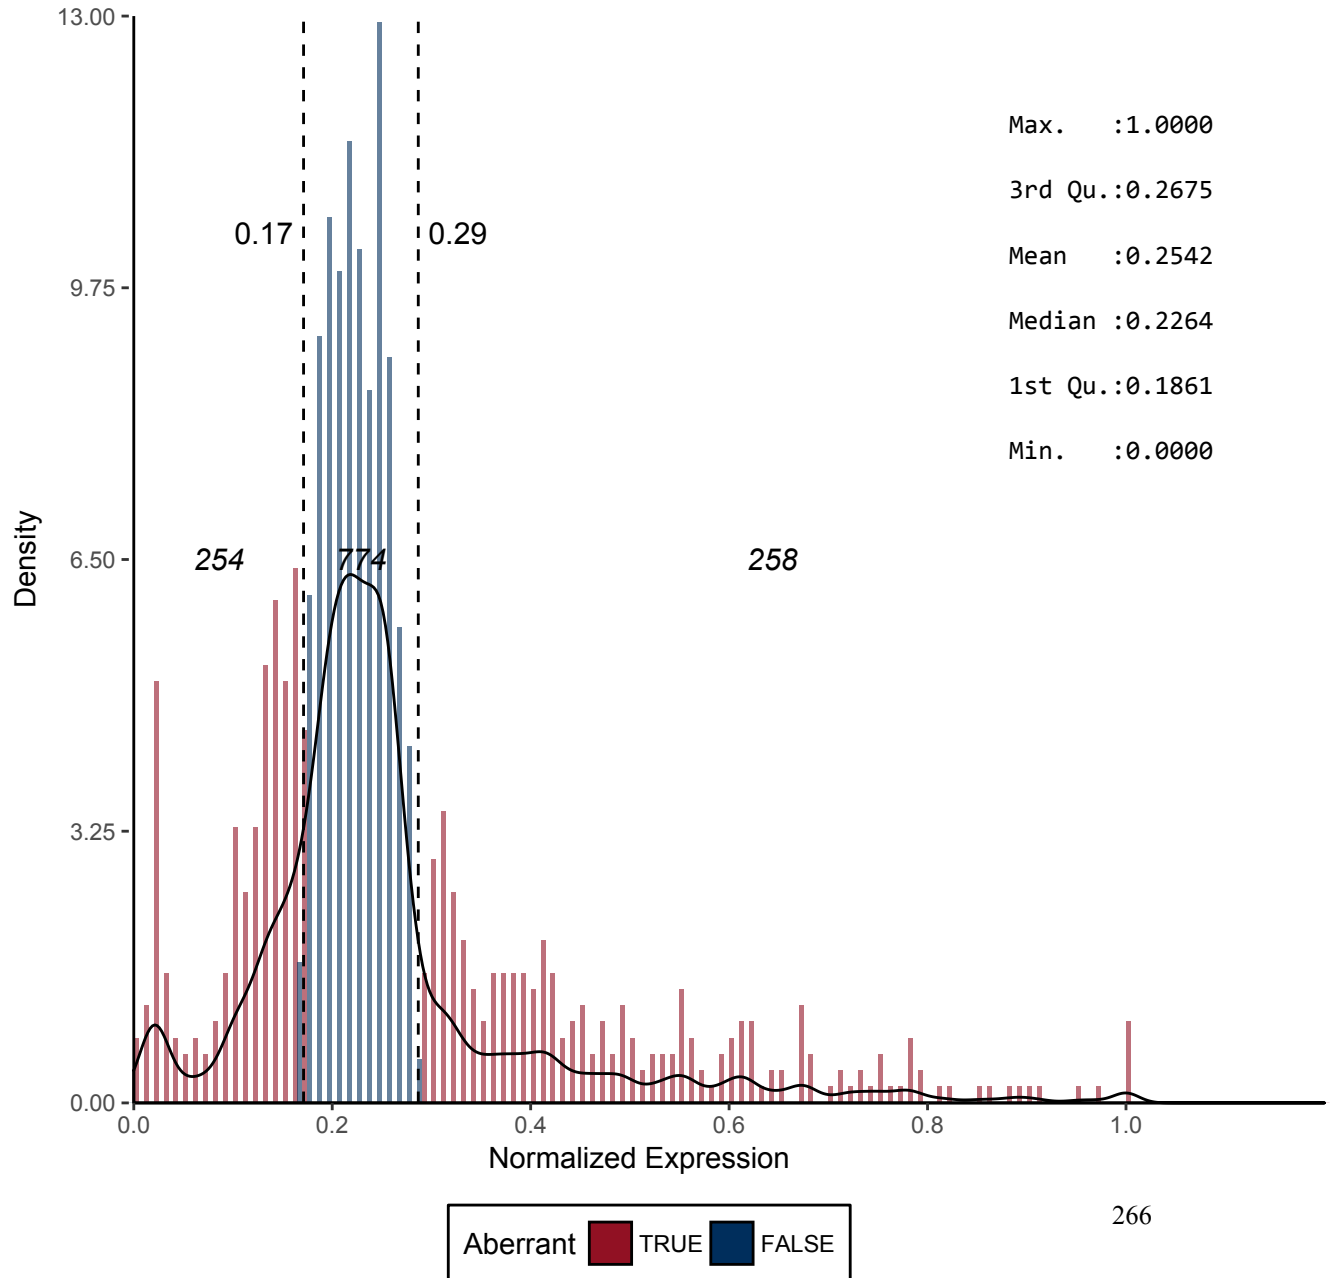

Figure 250 - CD240D\*

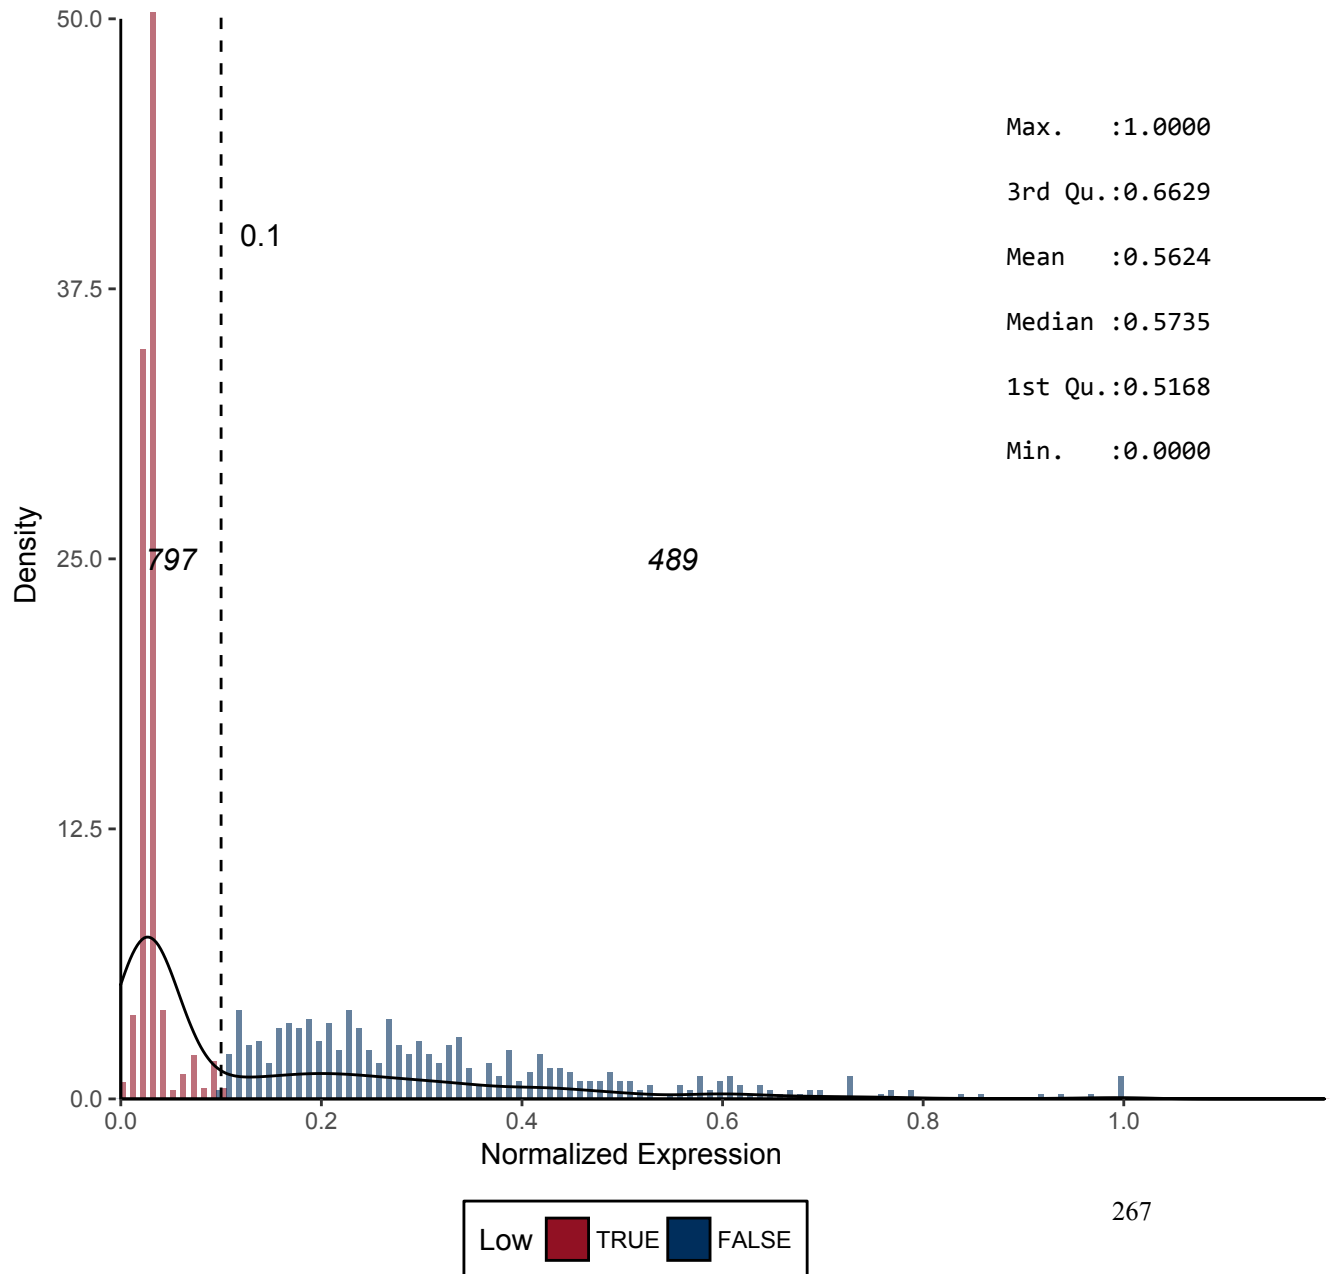

Figure 251 - CD241\*

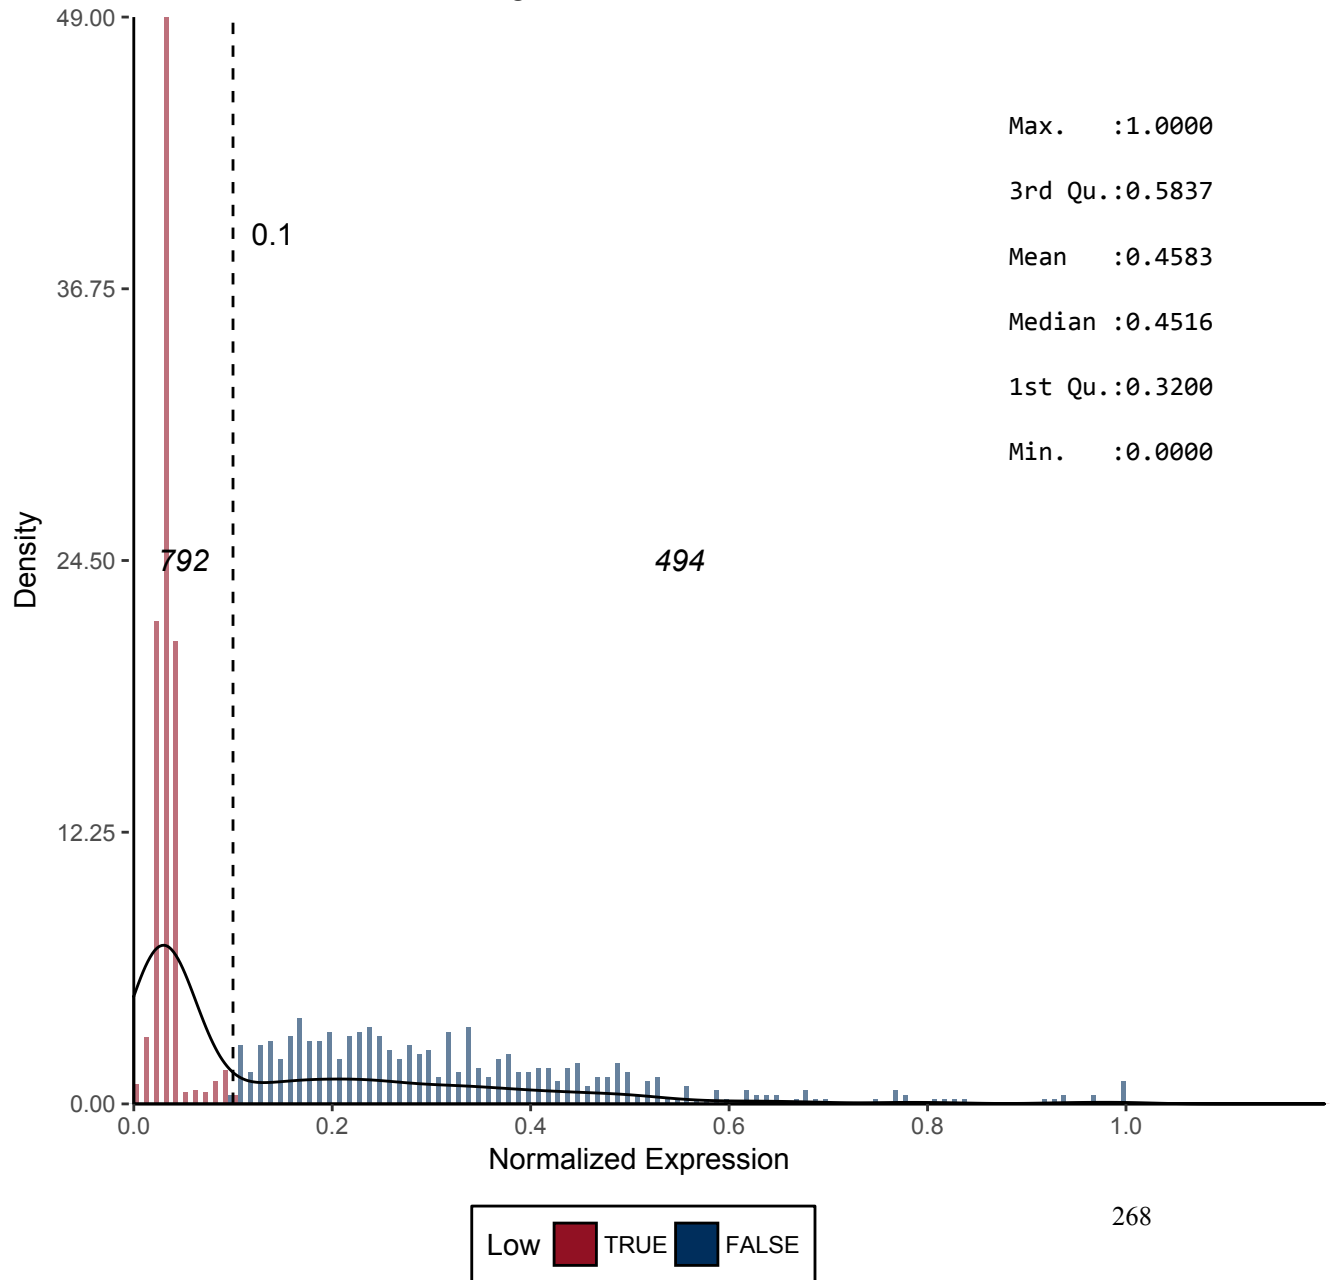

Figure 252 - CD242

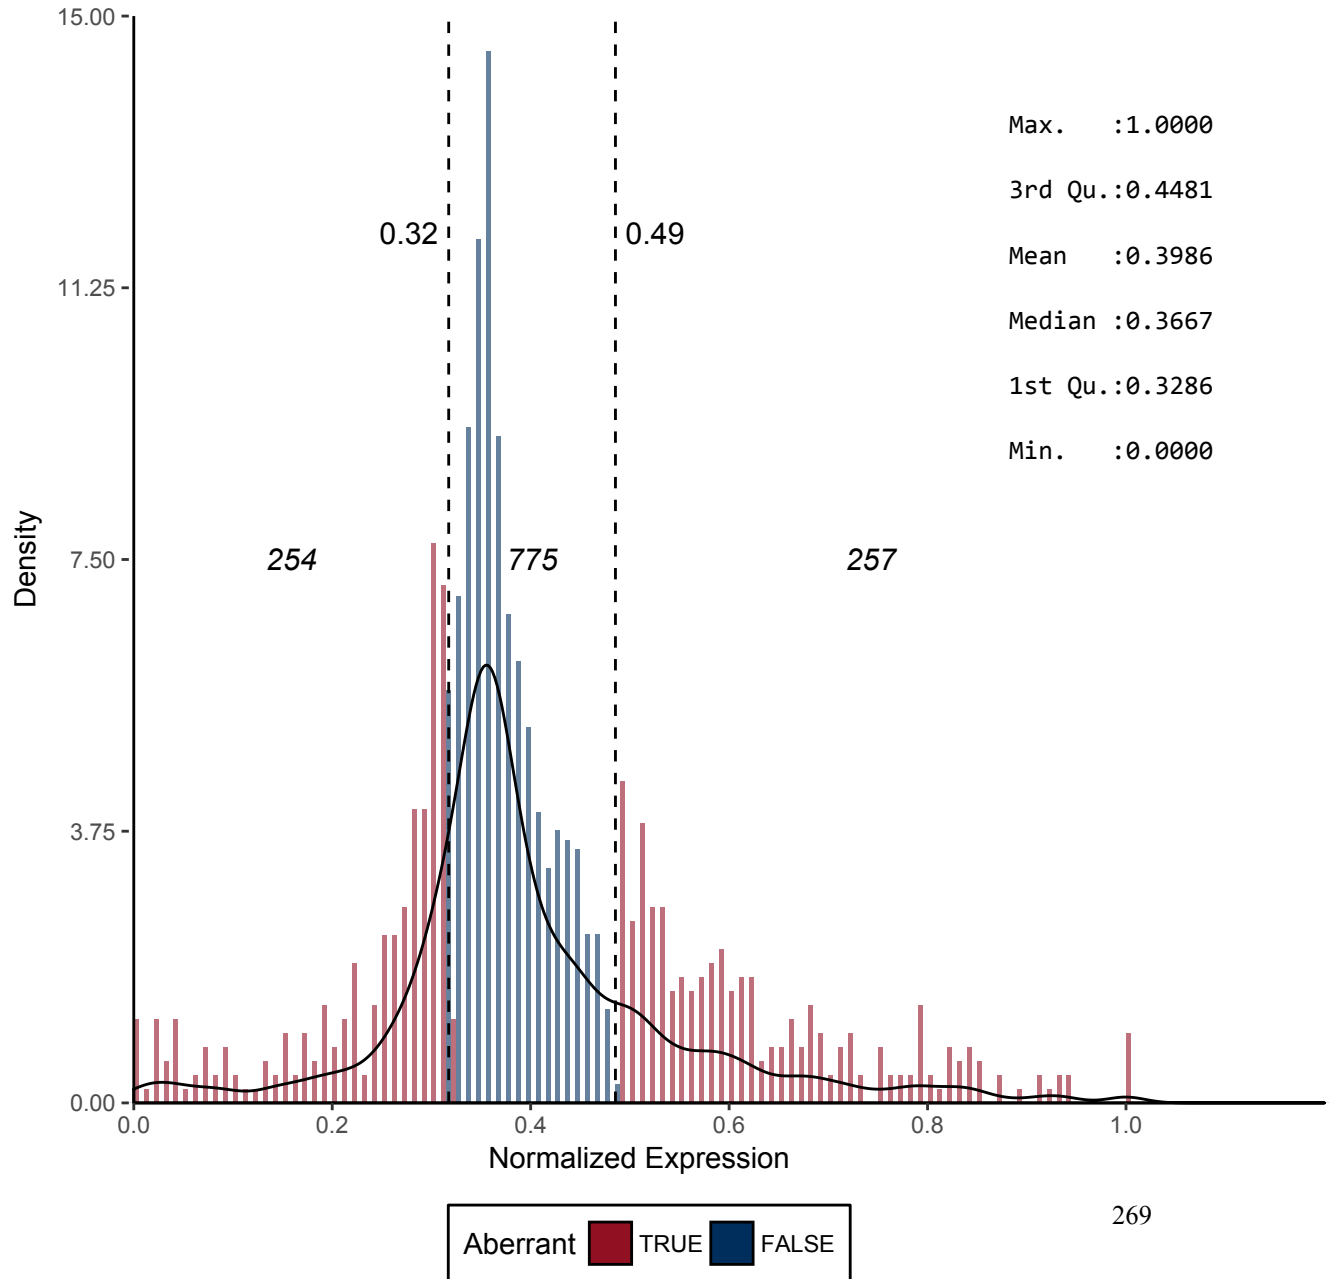

Figure 253 - CD243

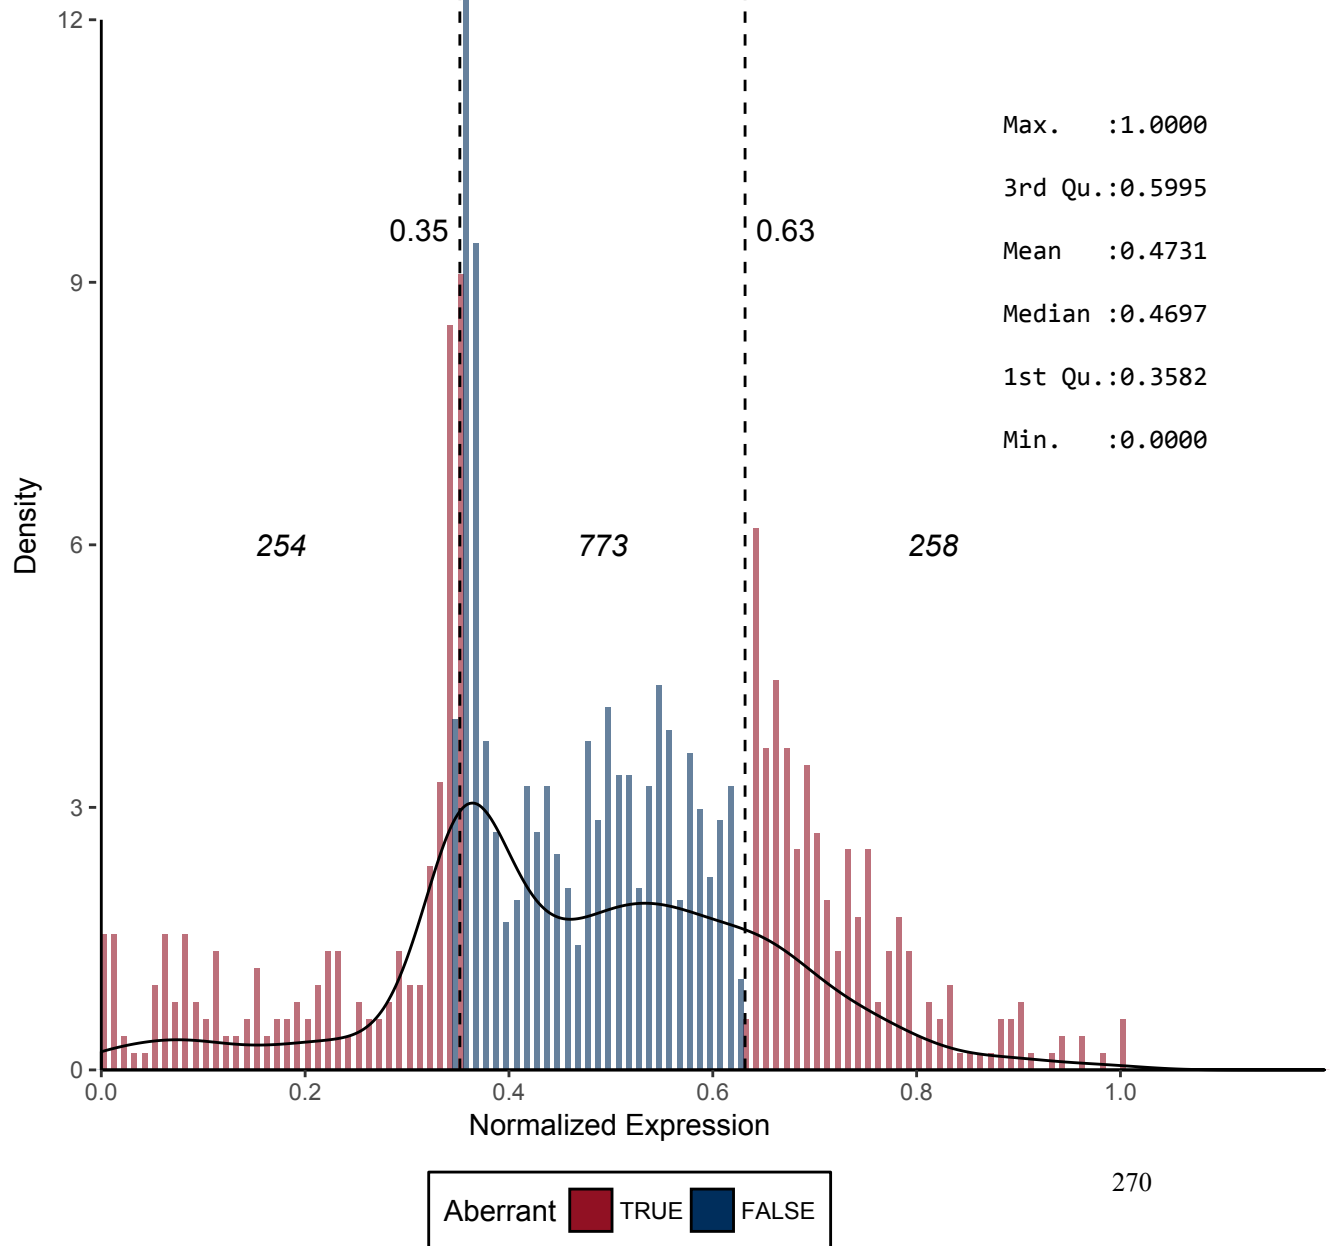

Figure 254 - CD244

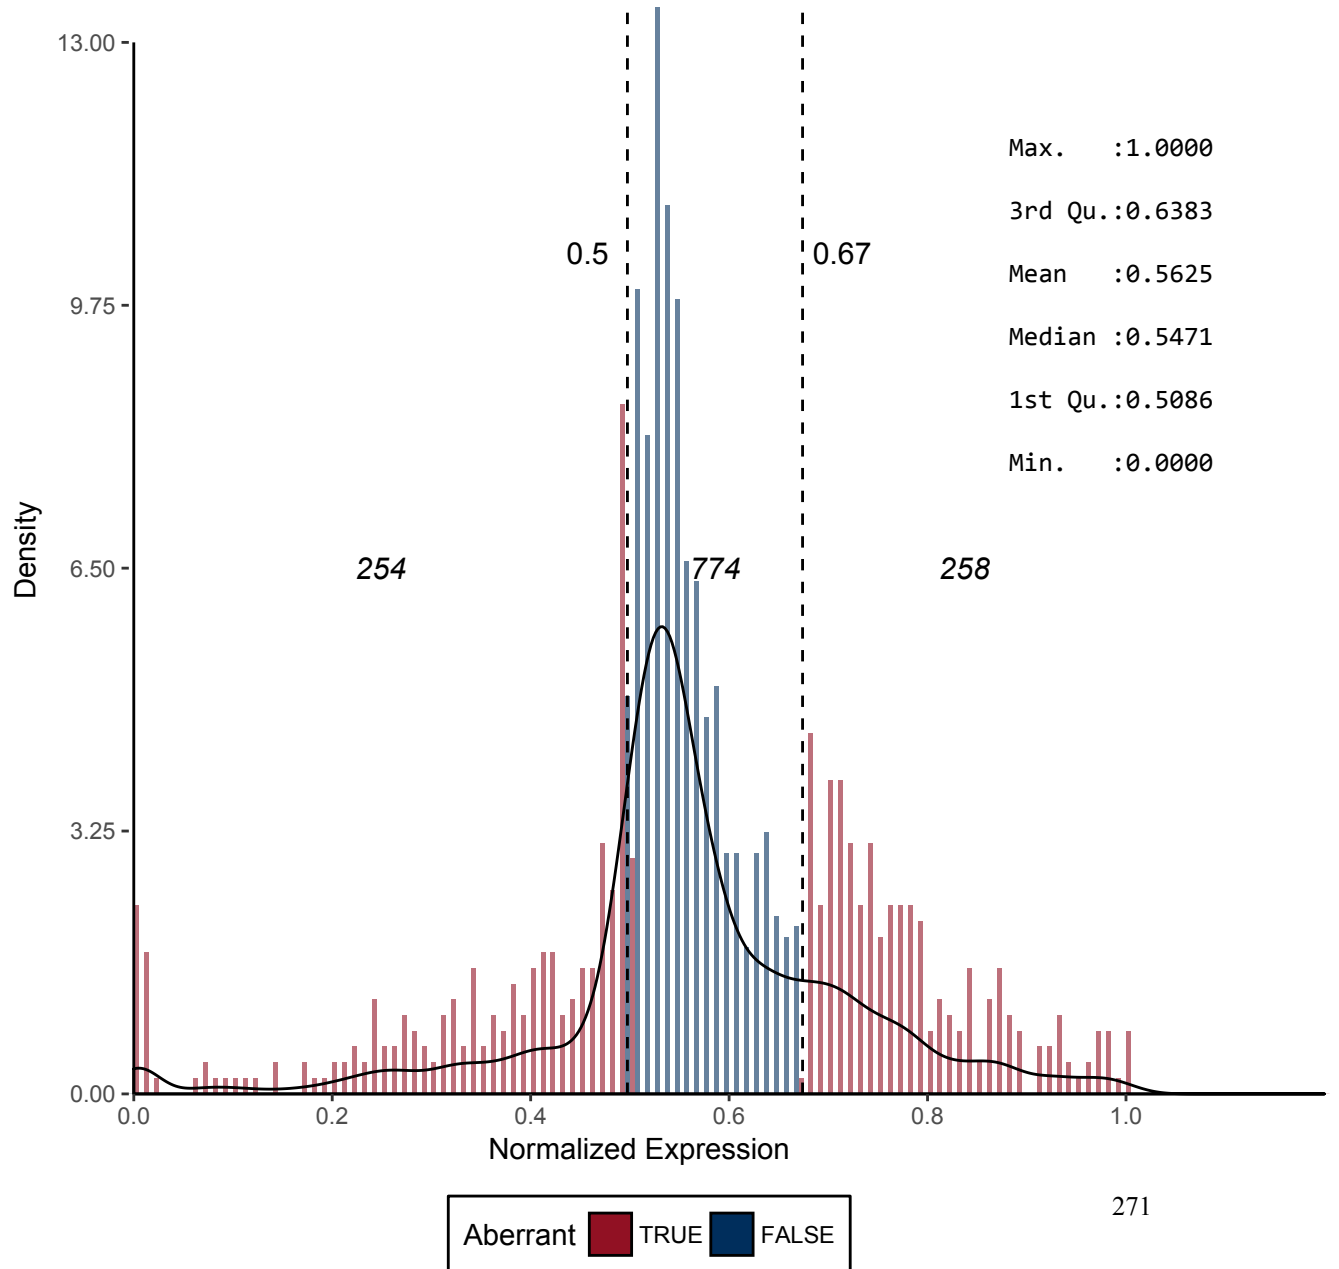

Figure 255 - CD246\*

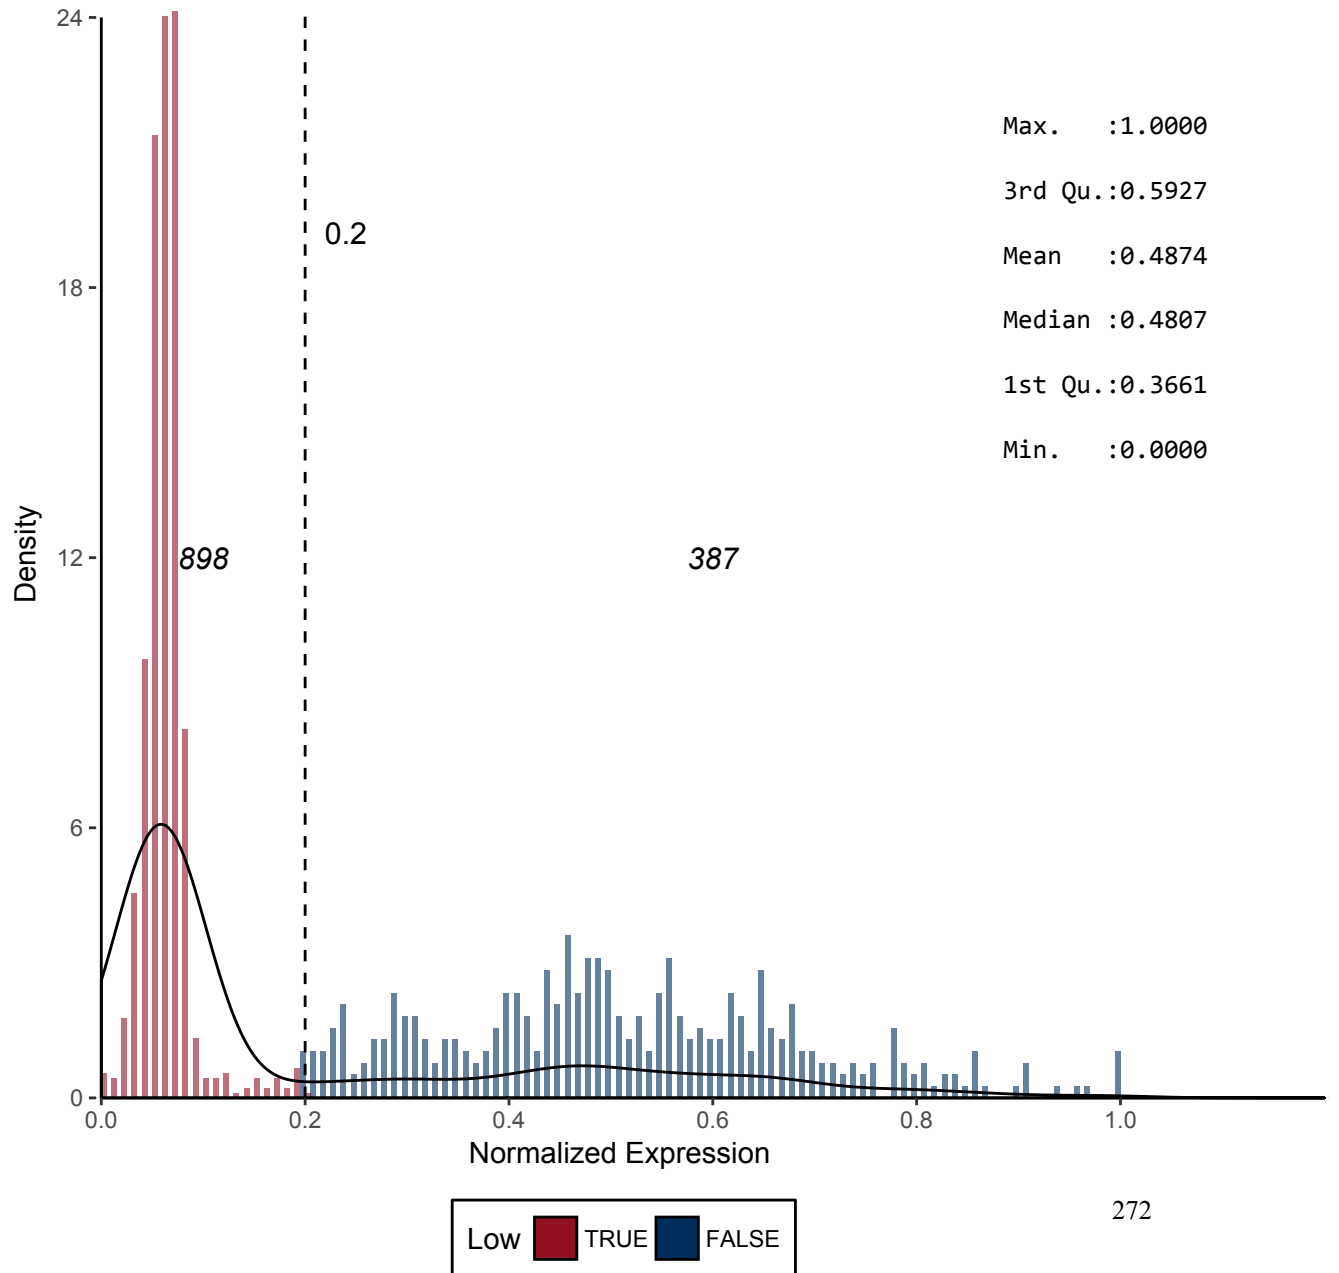



Figure 256 - CD247

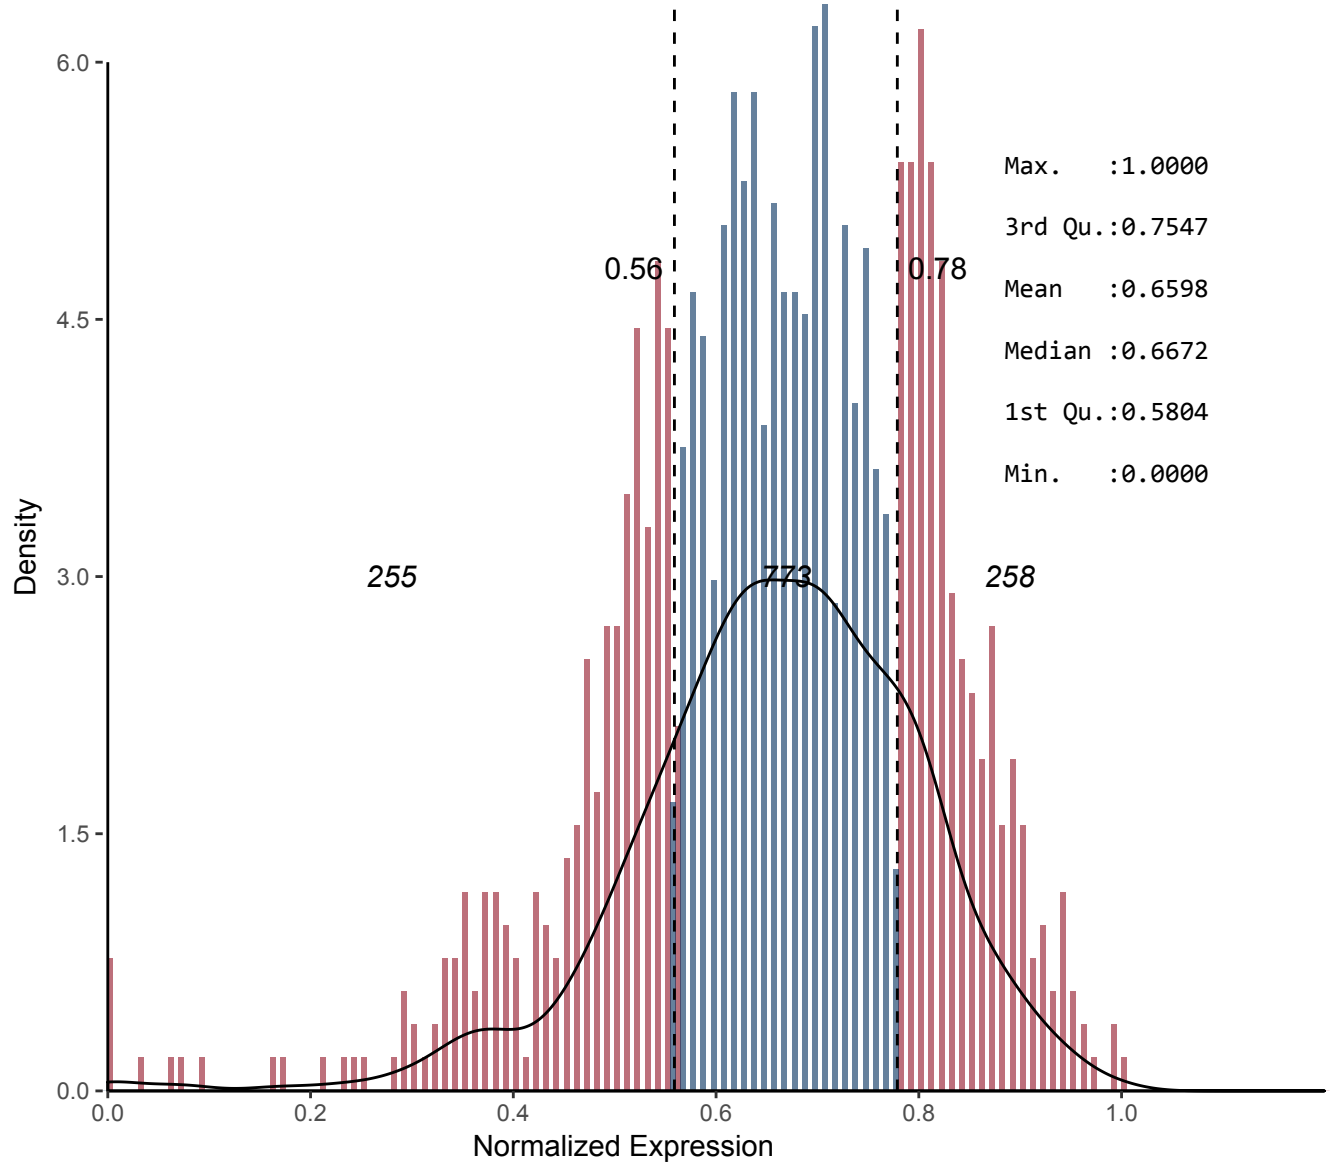

Aberrant TRUE FALSE

Figure 257 - CD248

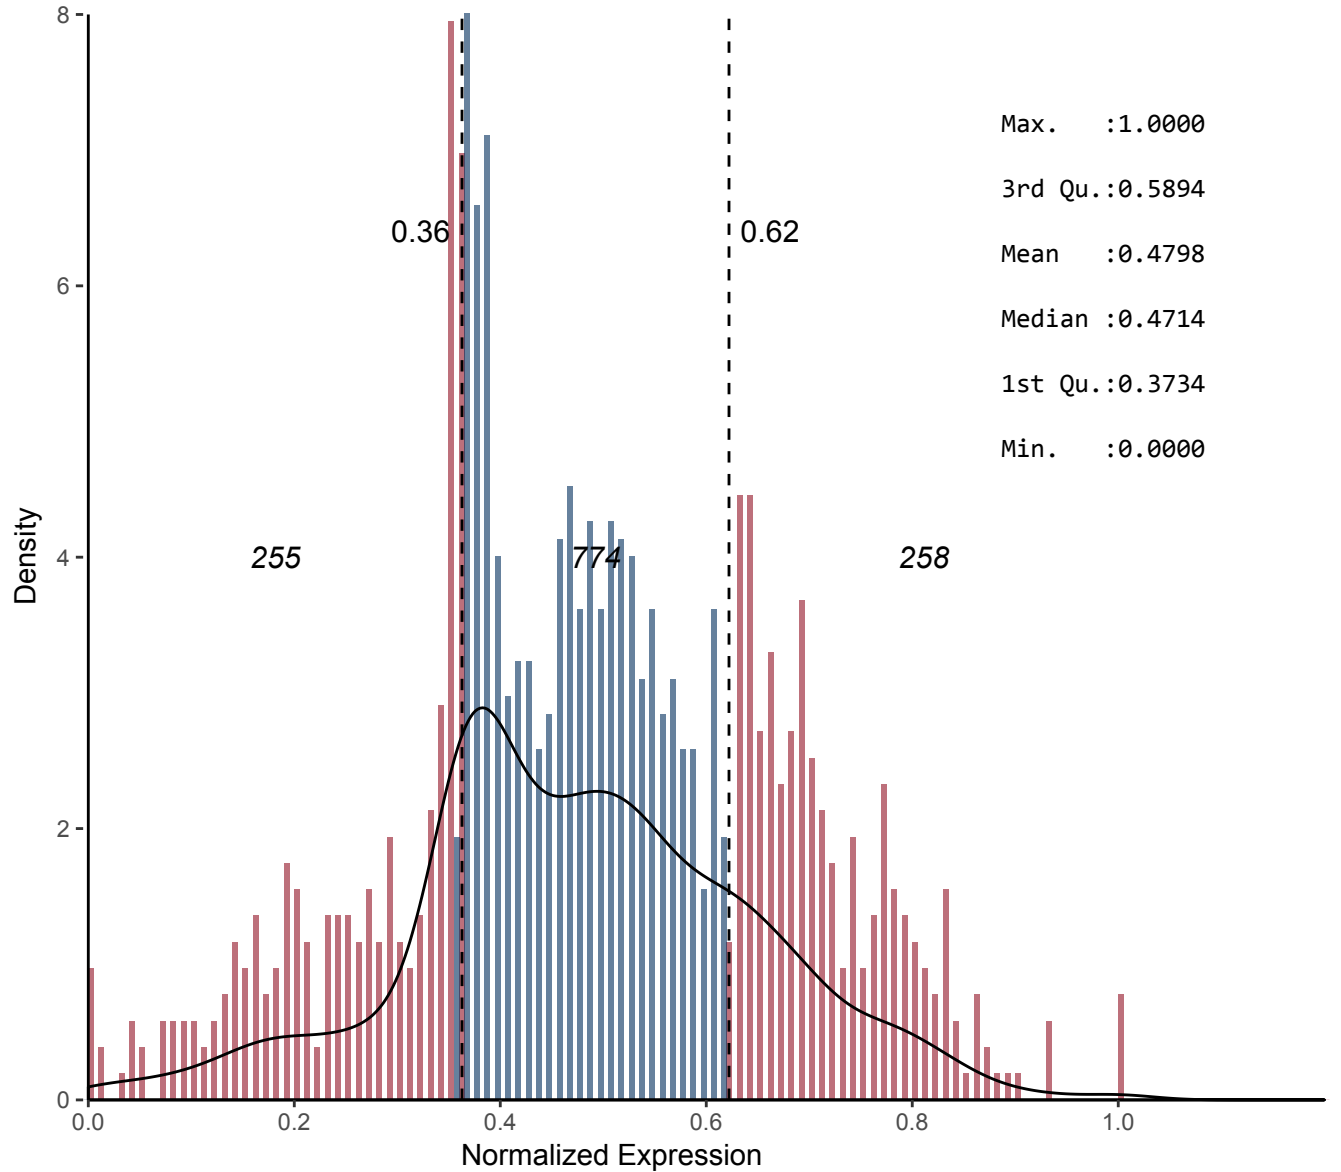

Figure 258 - CD249\*

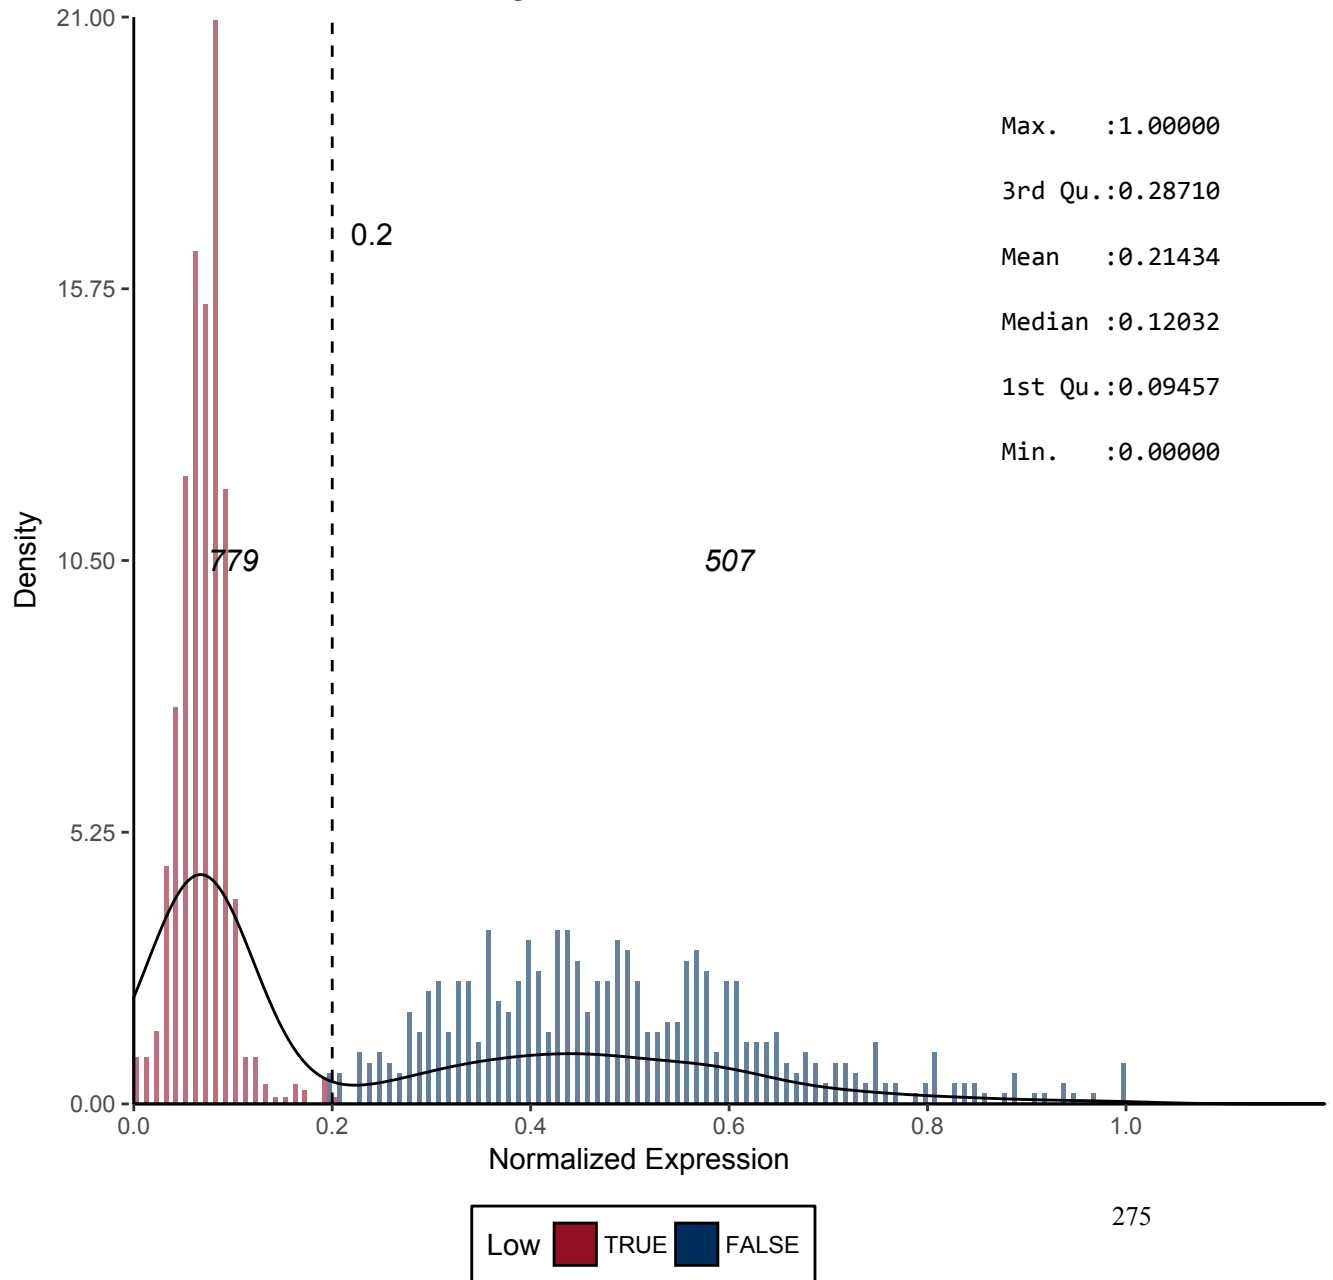

Figure 259 - CD252

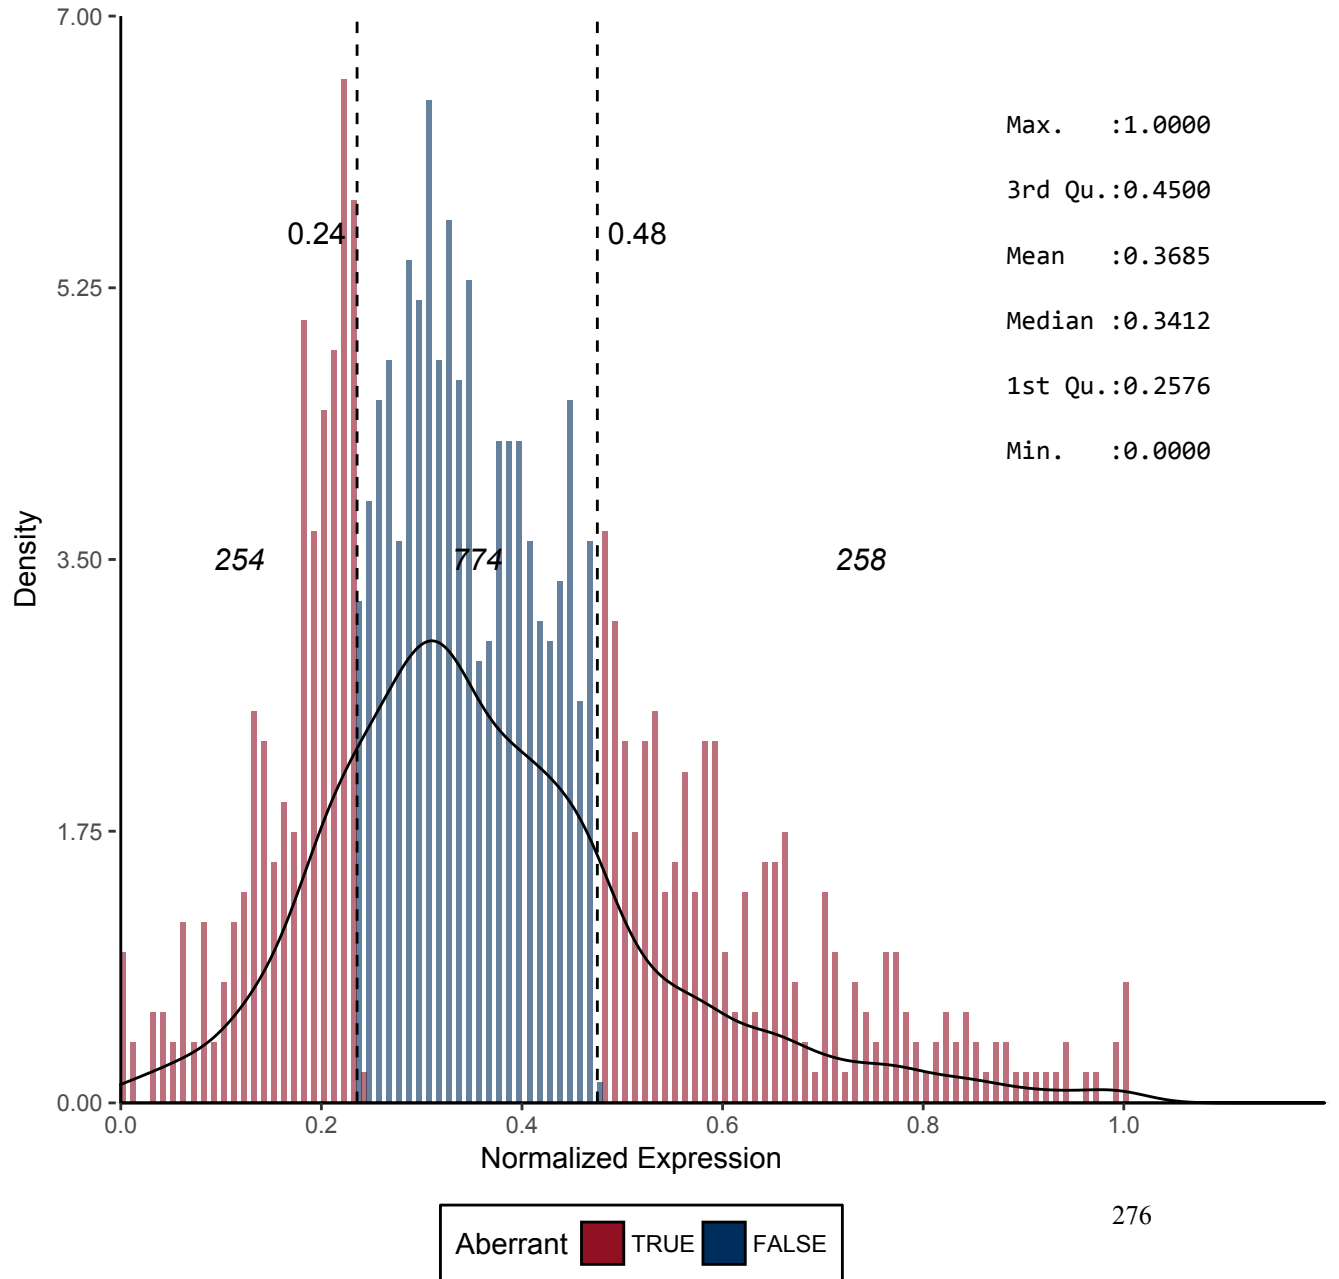

Figure 260 - CD253

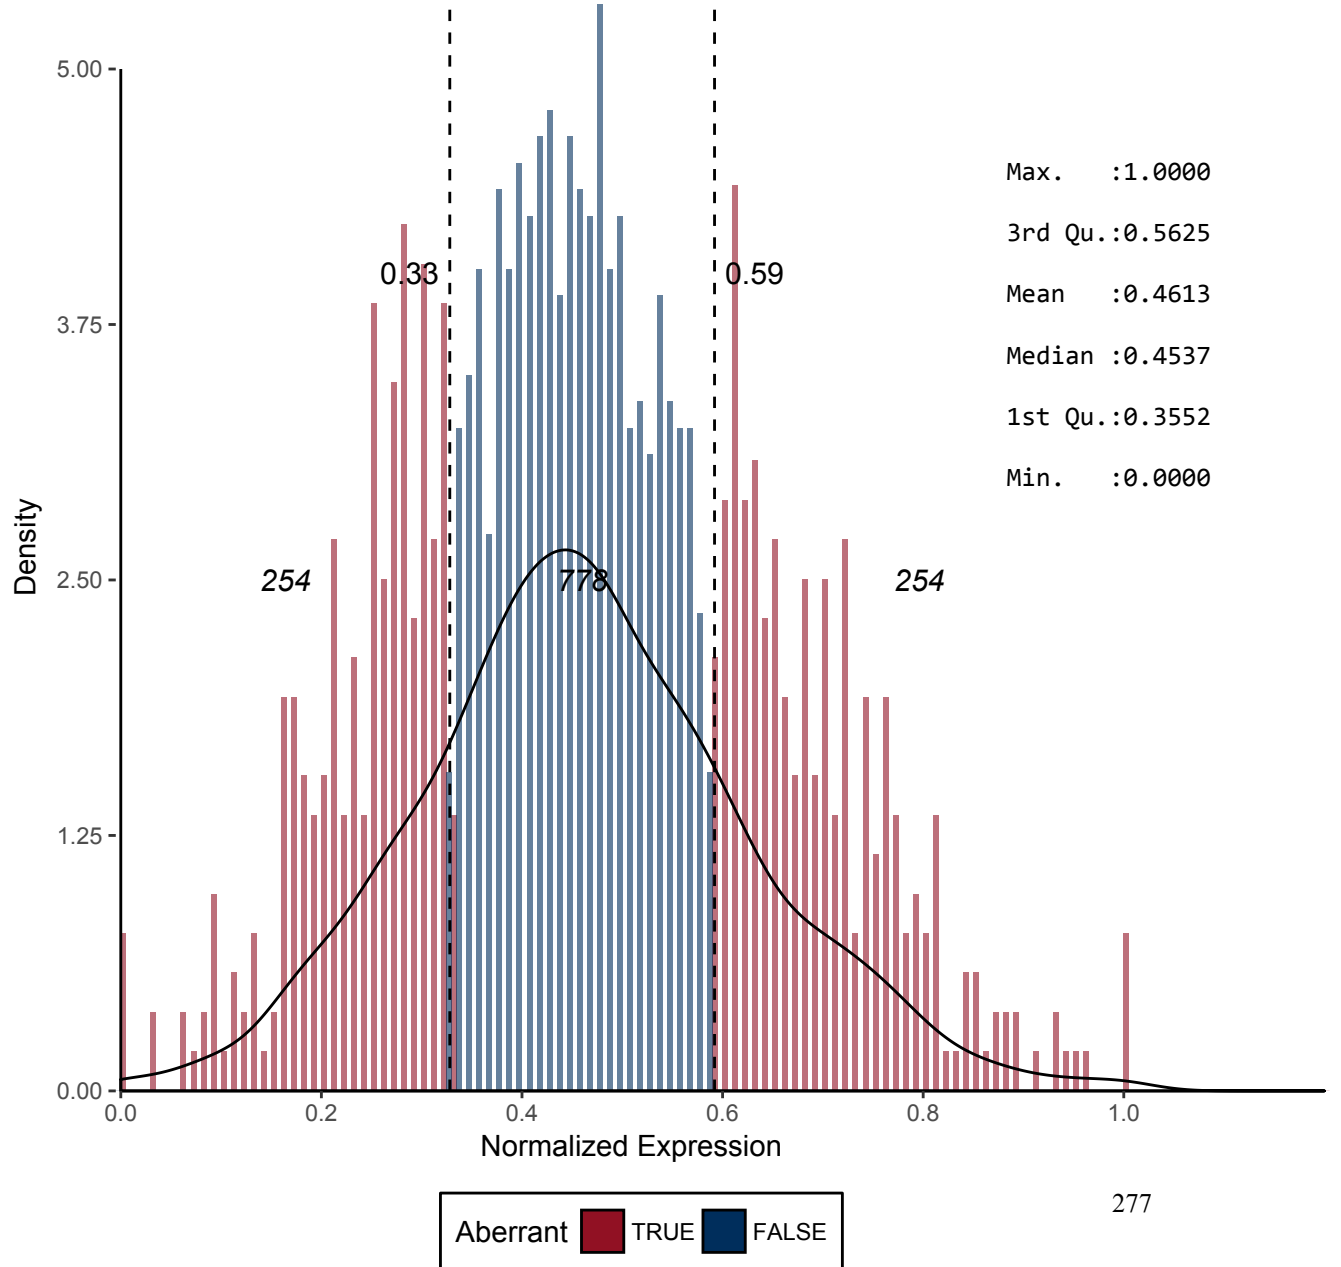

Figure 261 - CD254\*

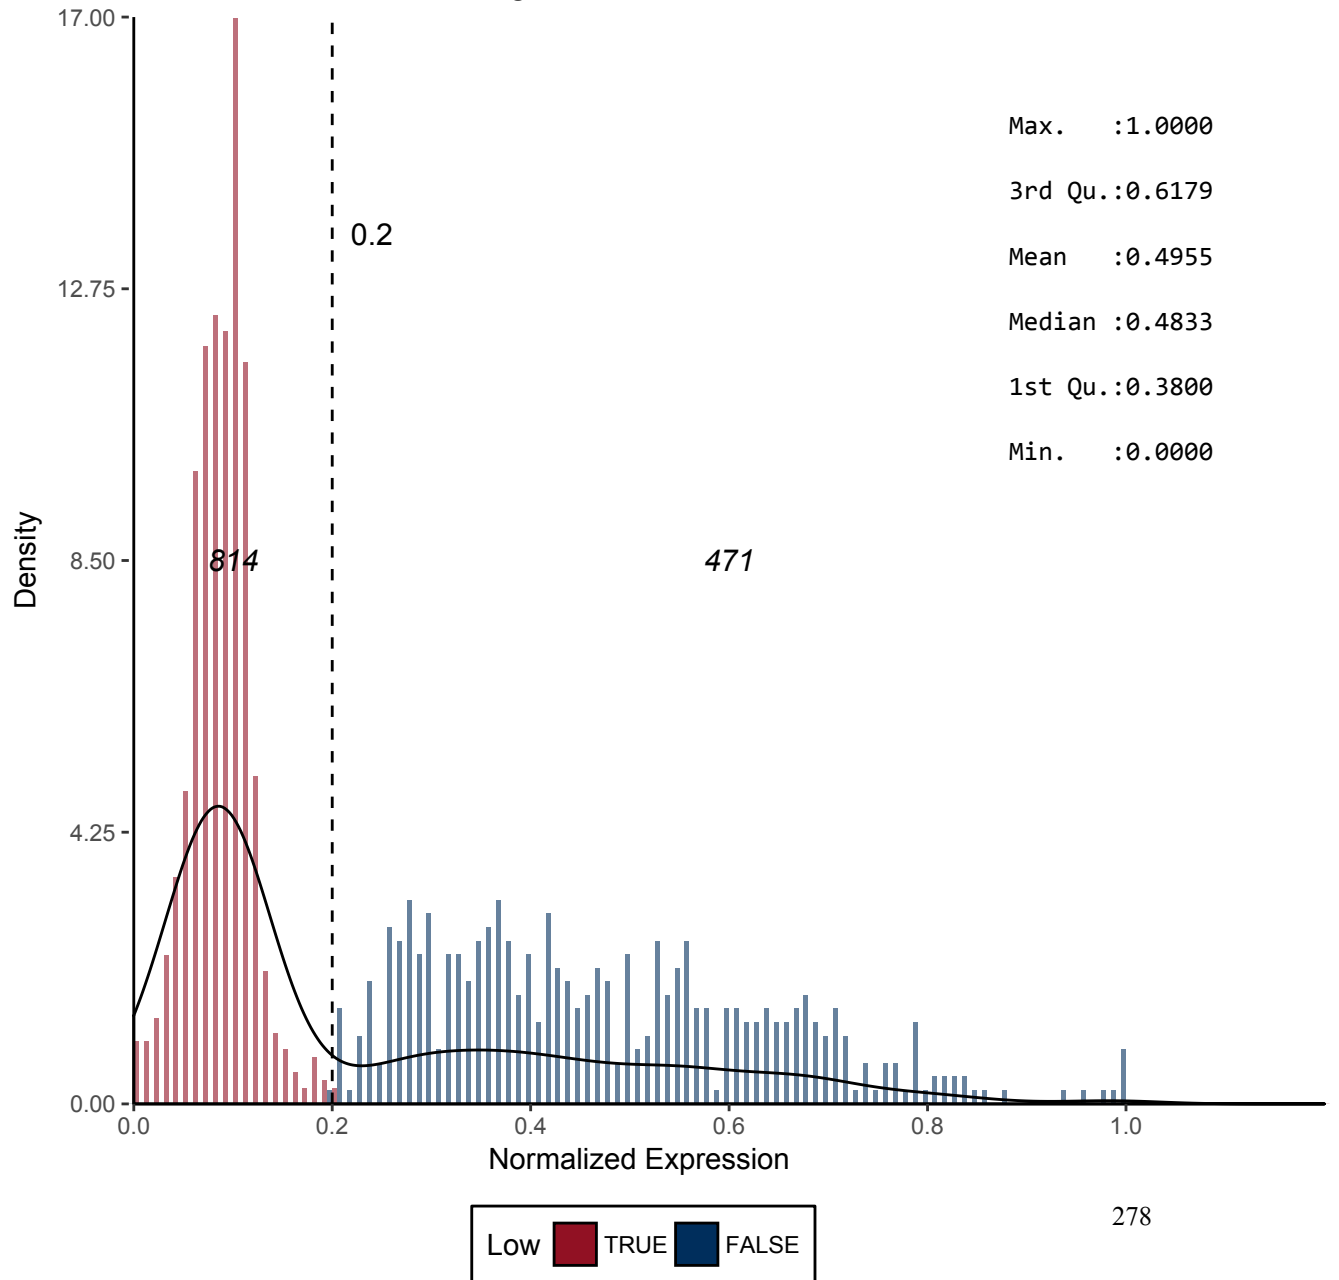

Figure 262 - CD257

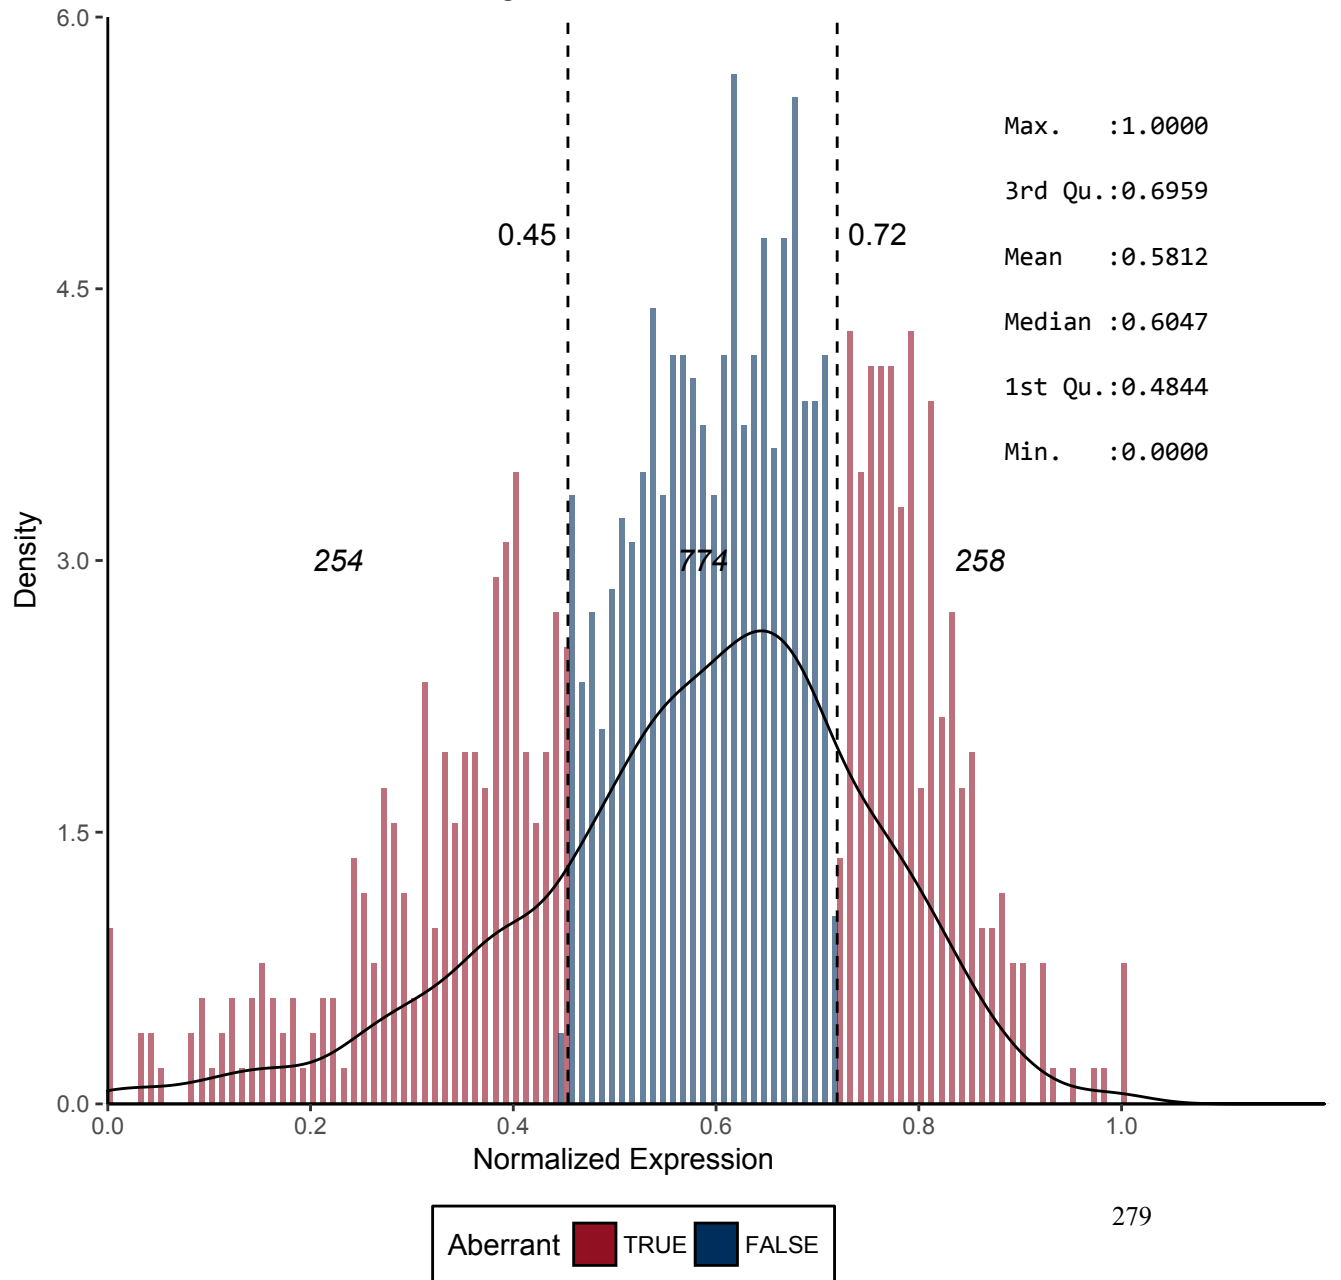

Figure 263 - CD258

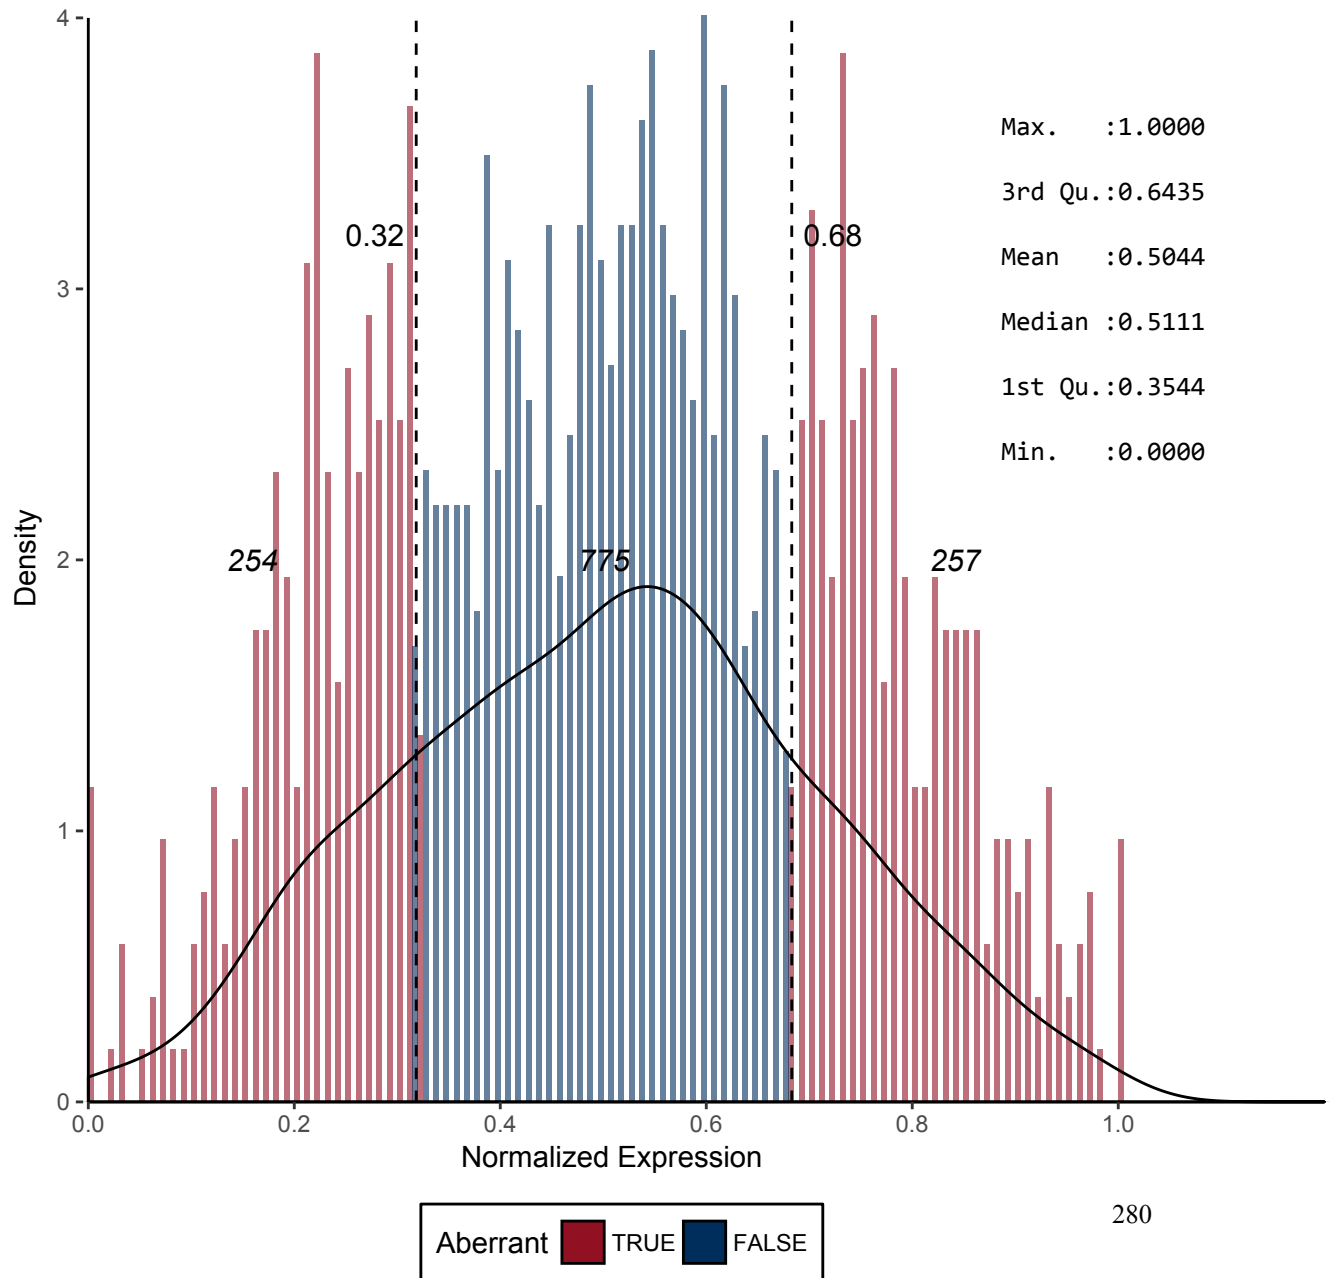



Figure 264 - CD262

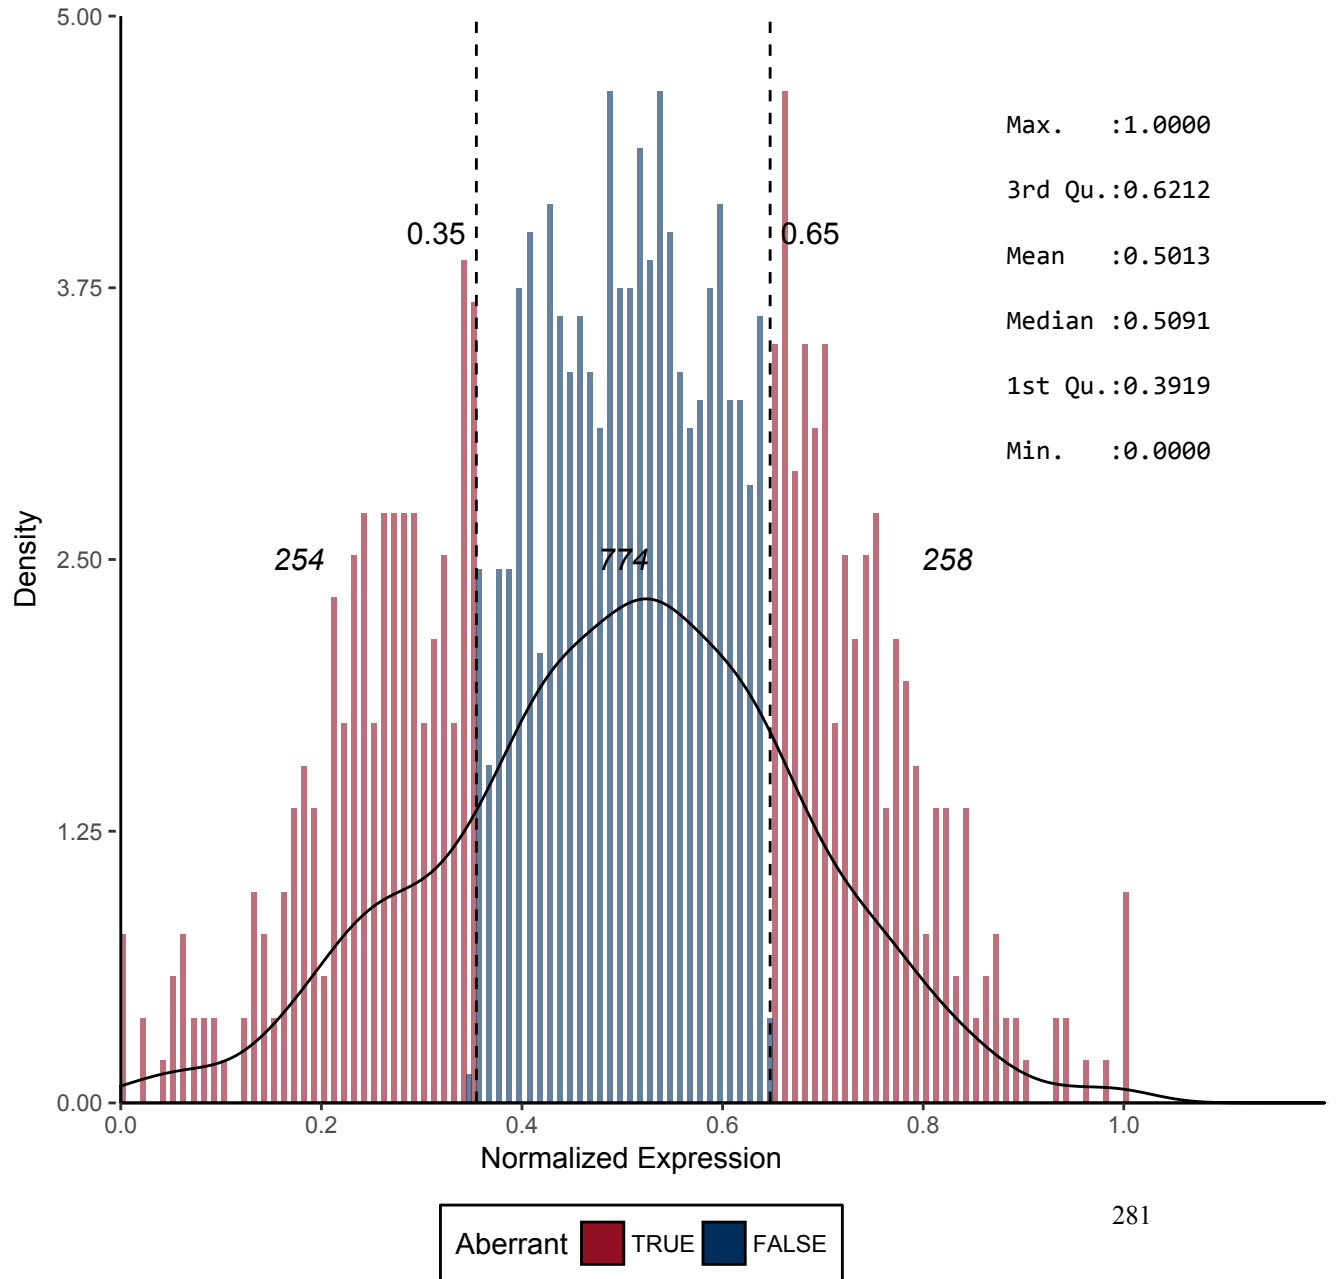

Figure 265 - CD263

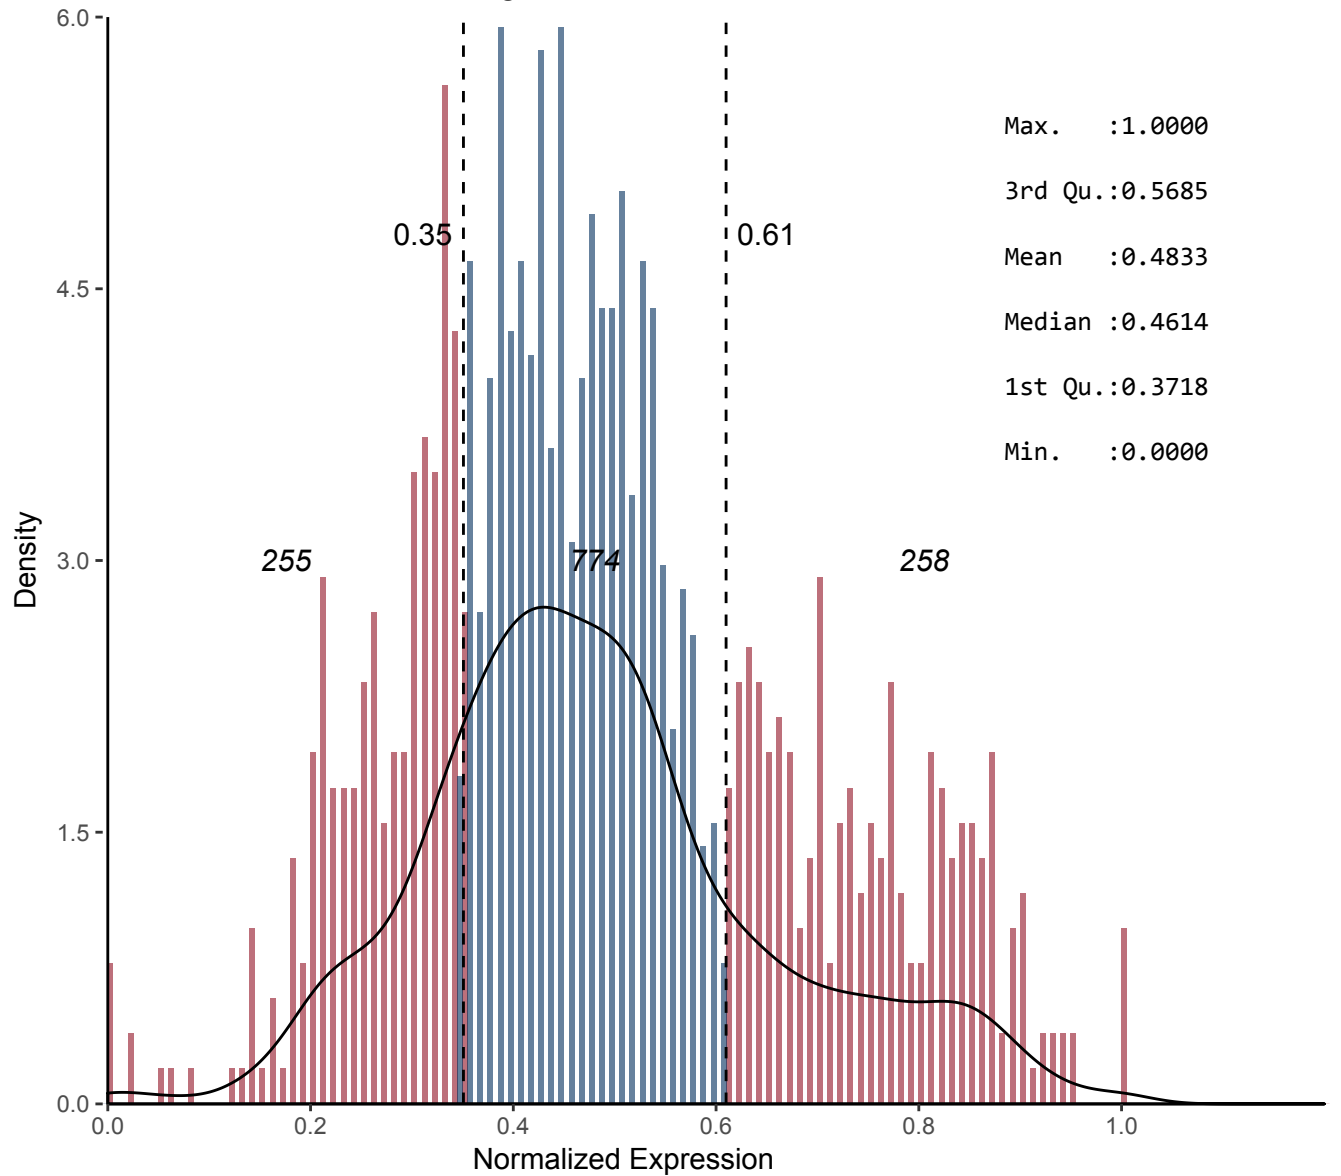

Aberrant TRUE FALSE

Figure 266 - CD264\*

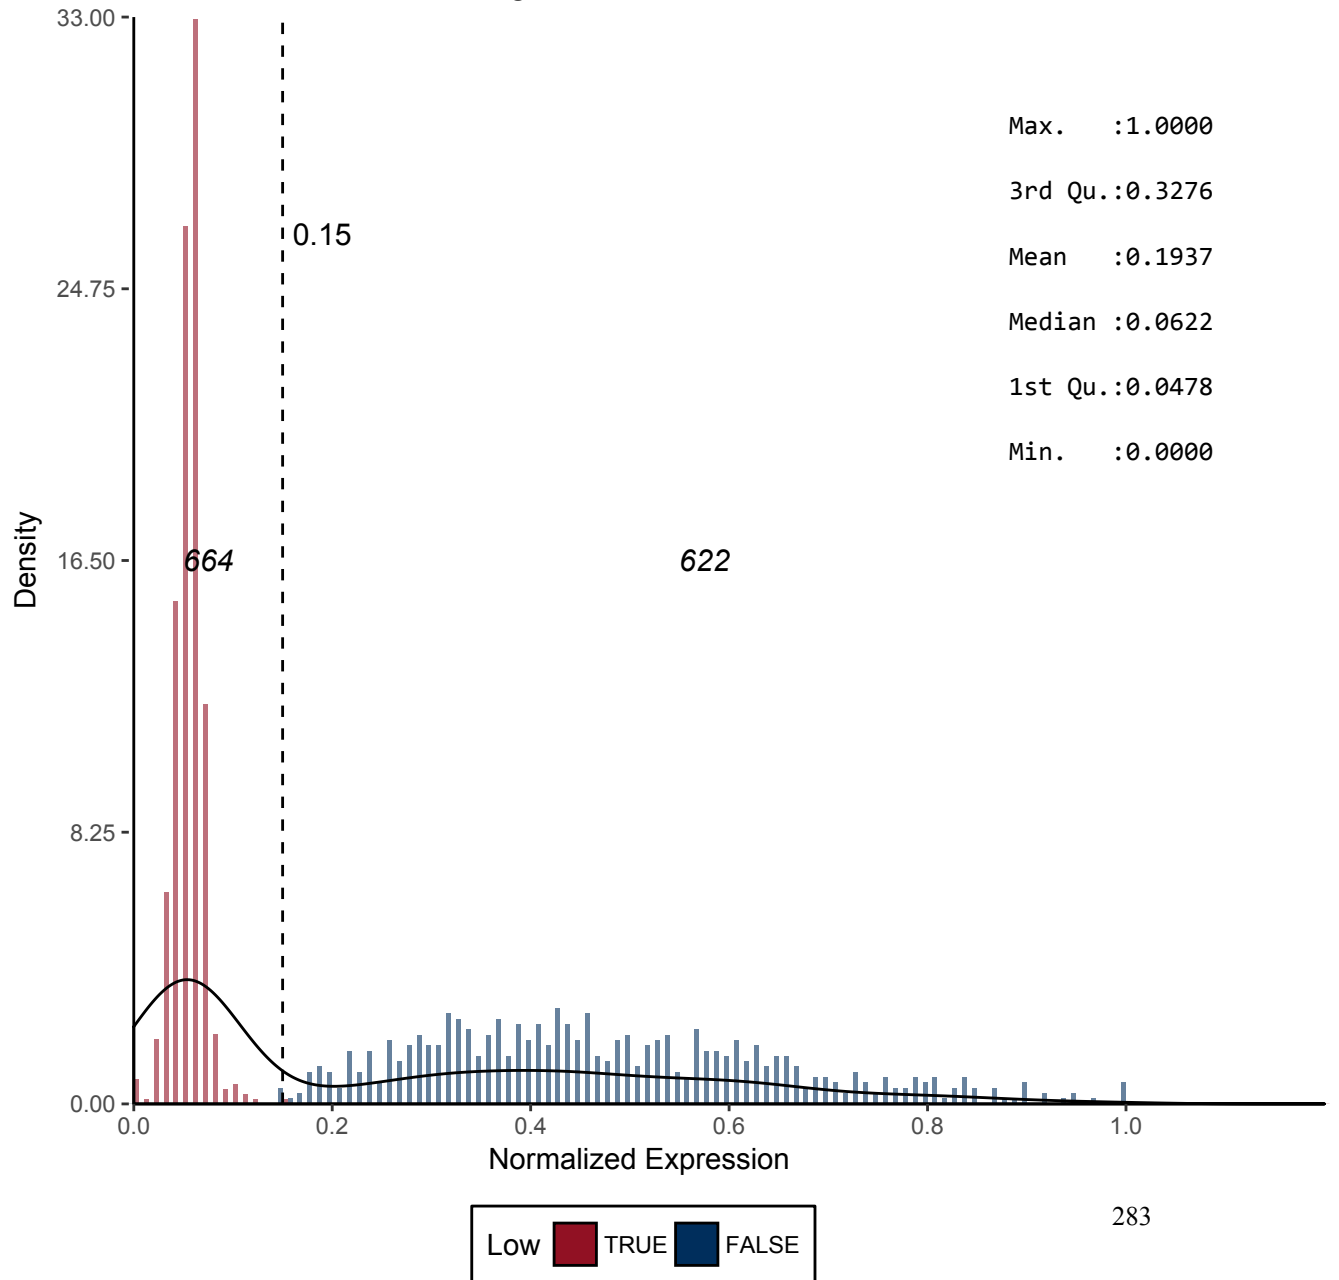

Figure 267 - CD265\*

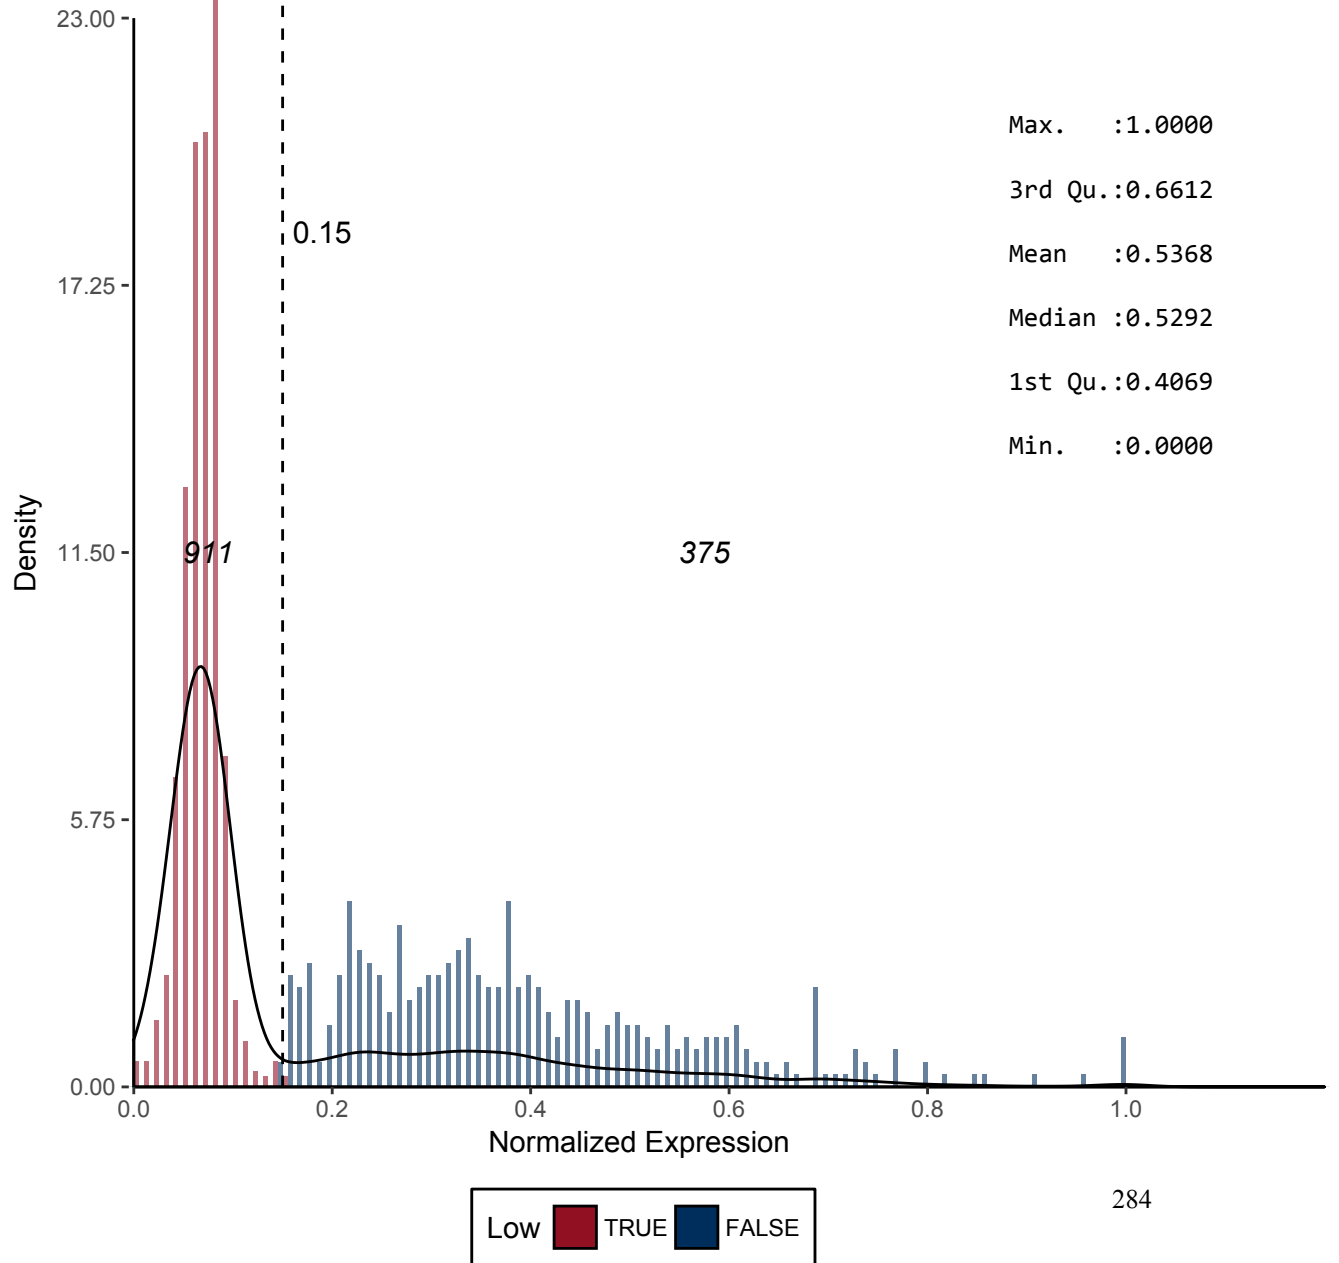

Figure 268 - CD266

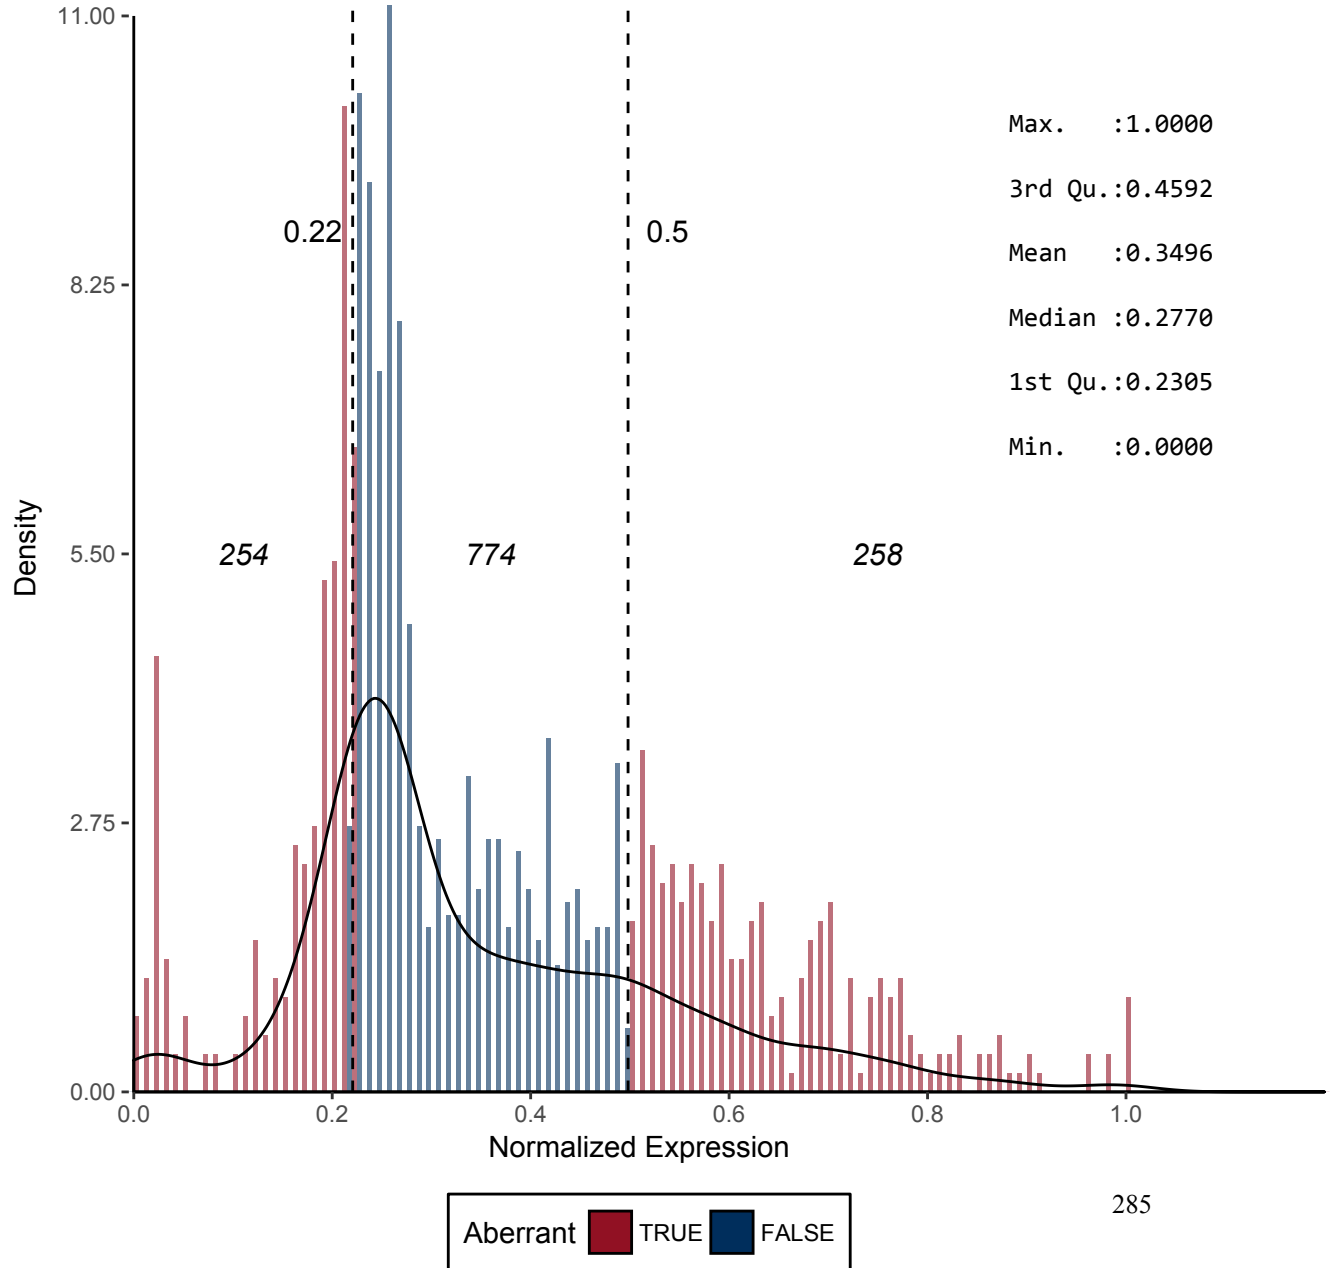

Figure 269 - CD267

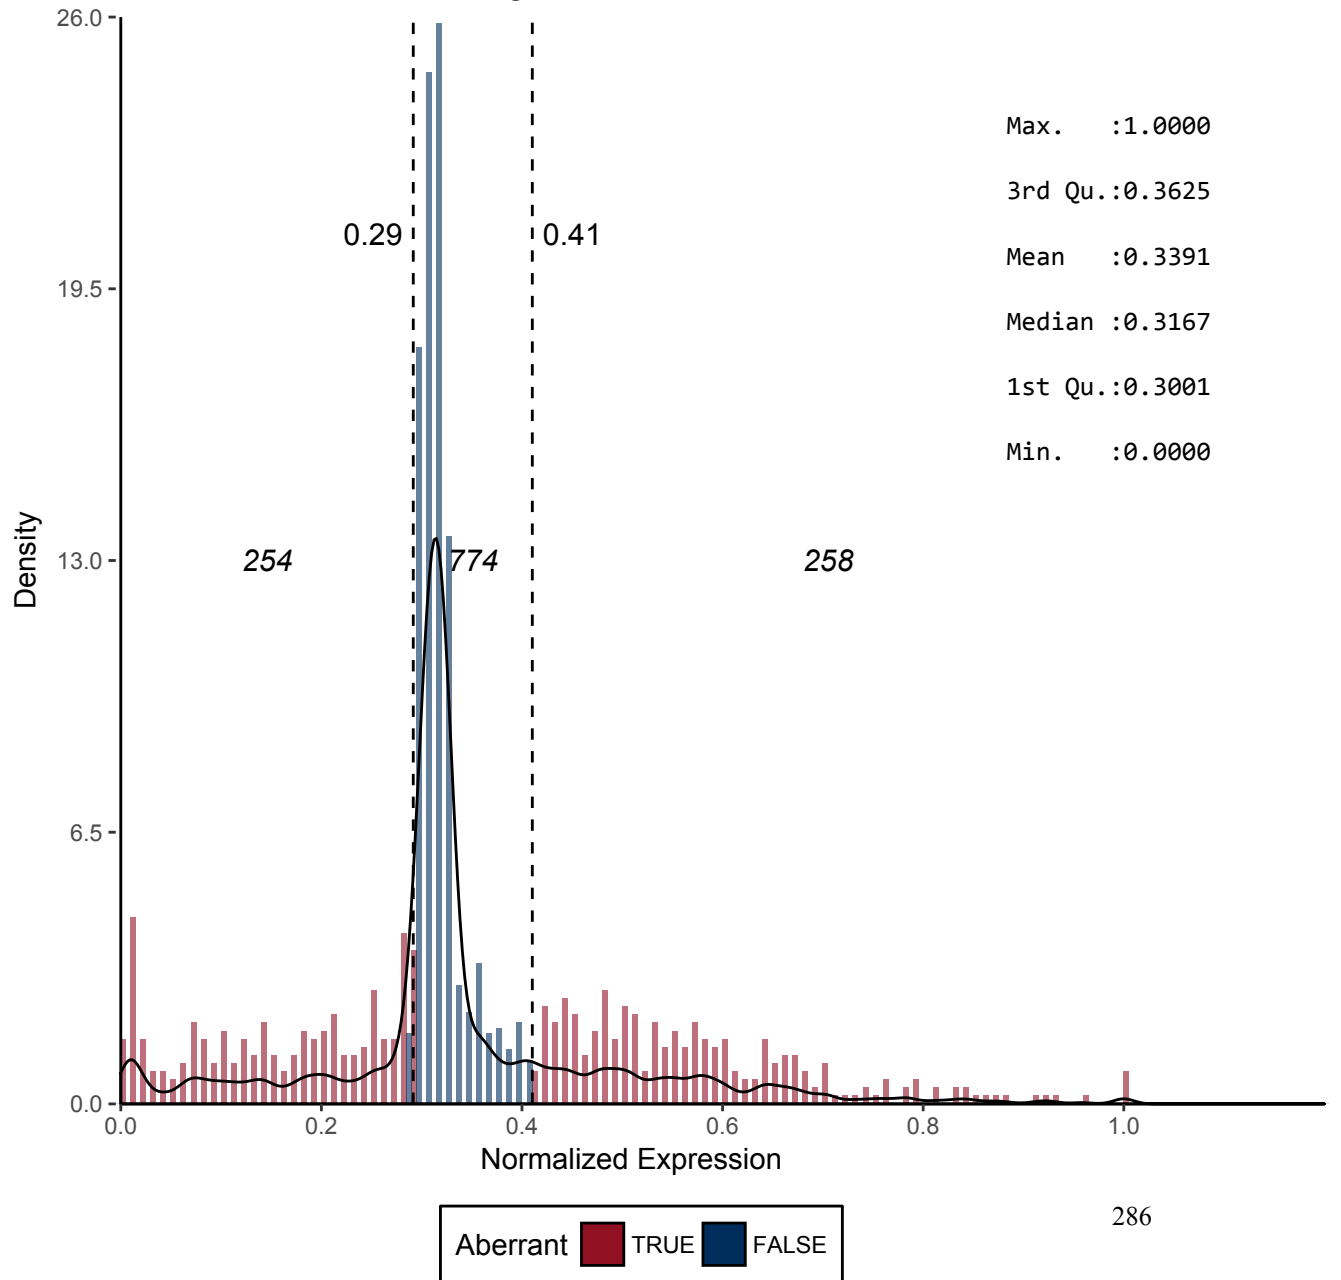

Figure 270 - CD269

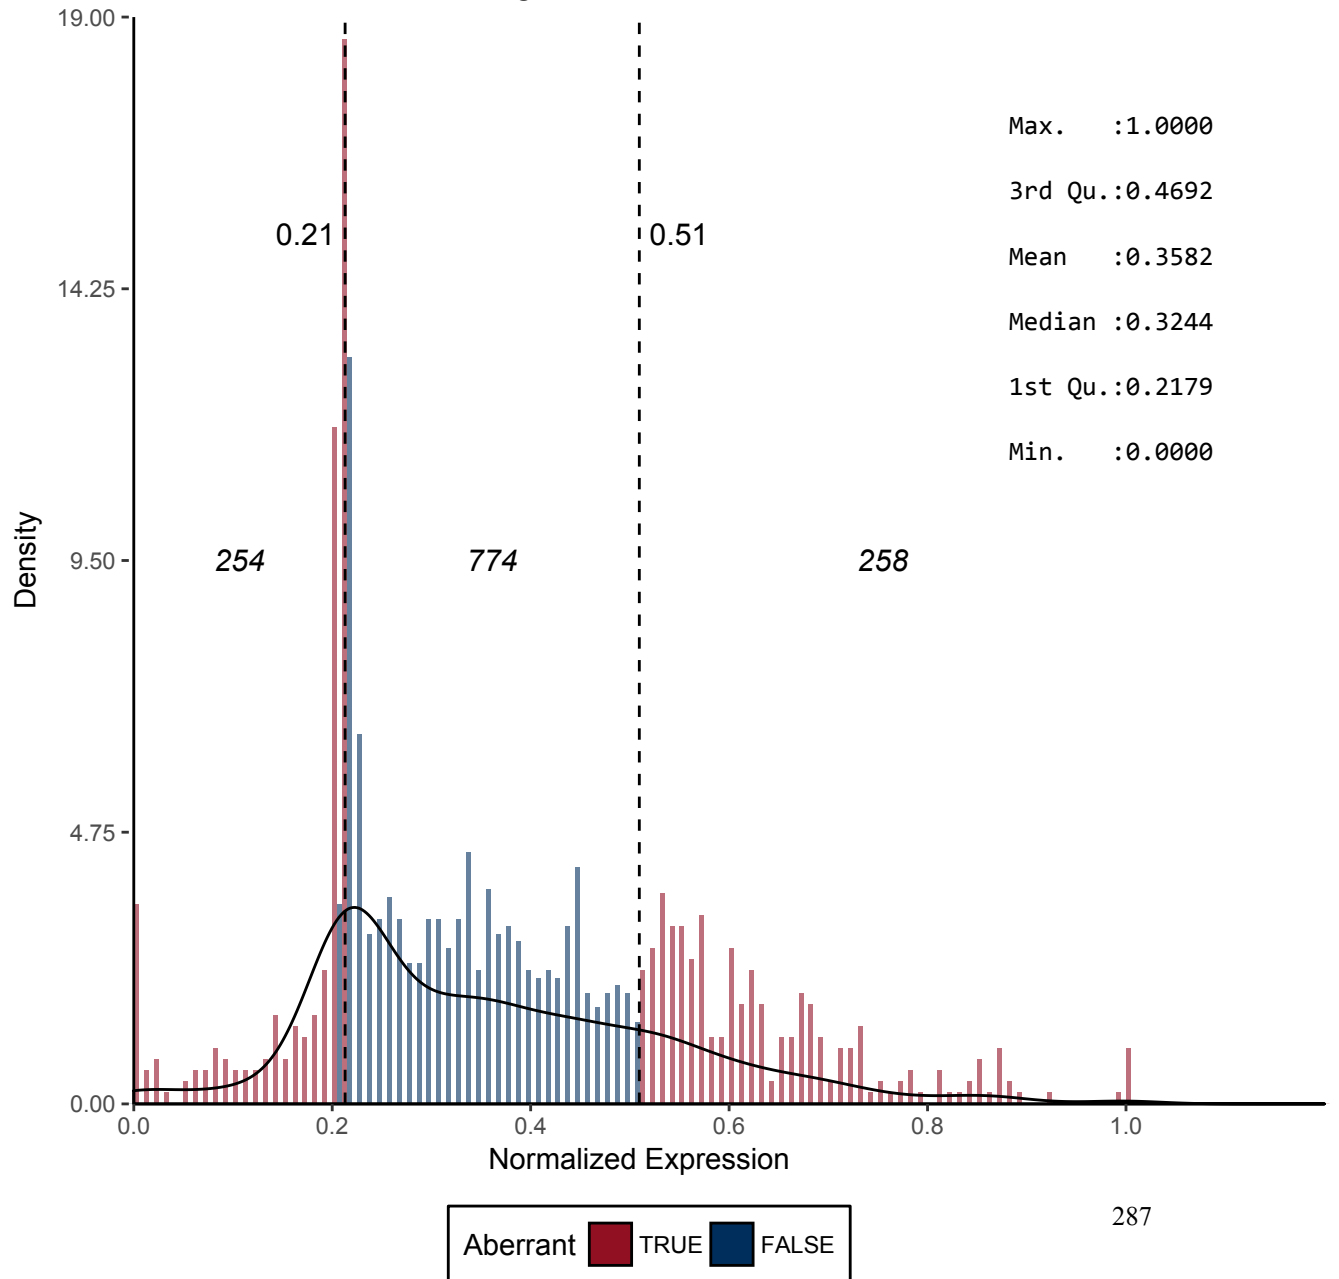

Figure 271 - CD270

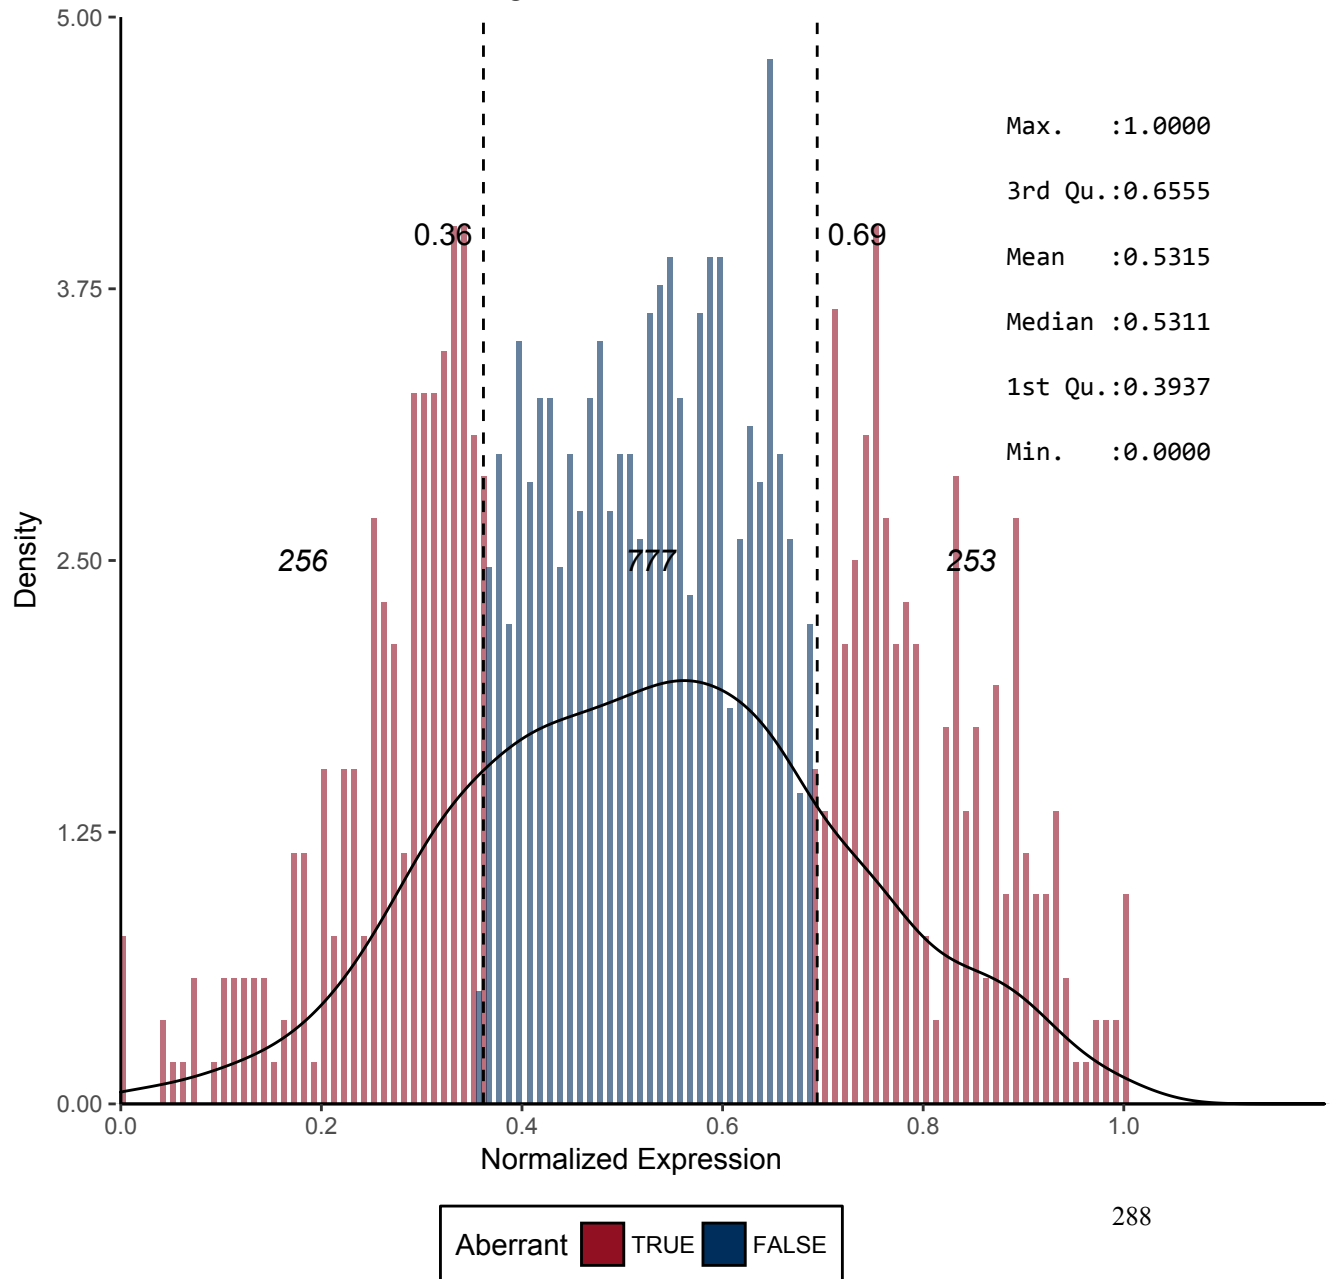



Figure 272 - CD271\*

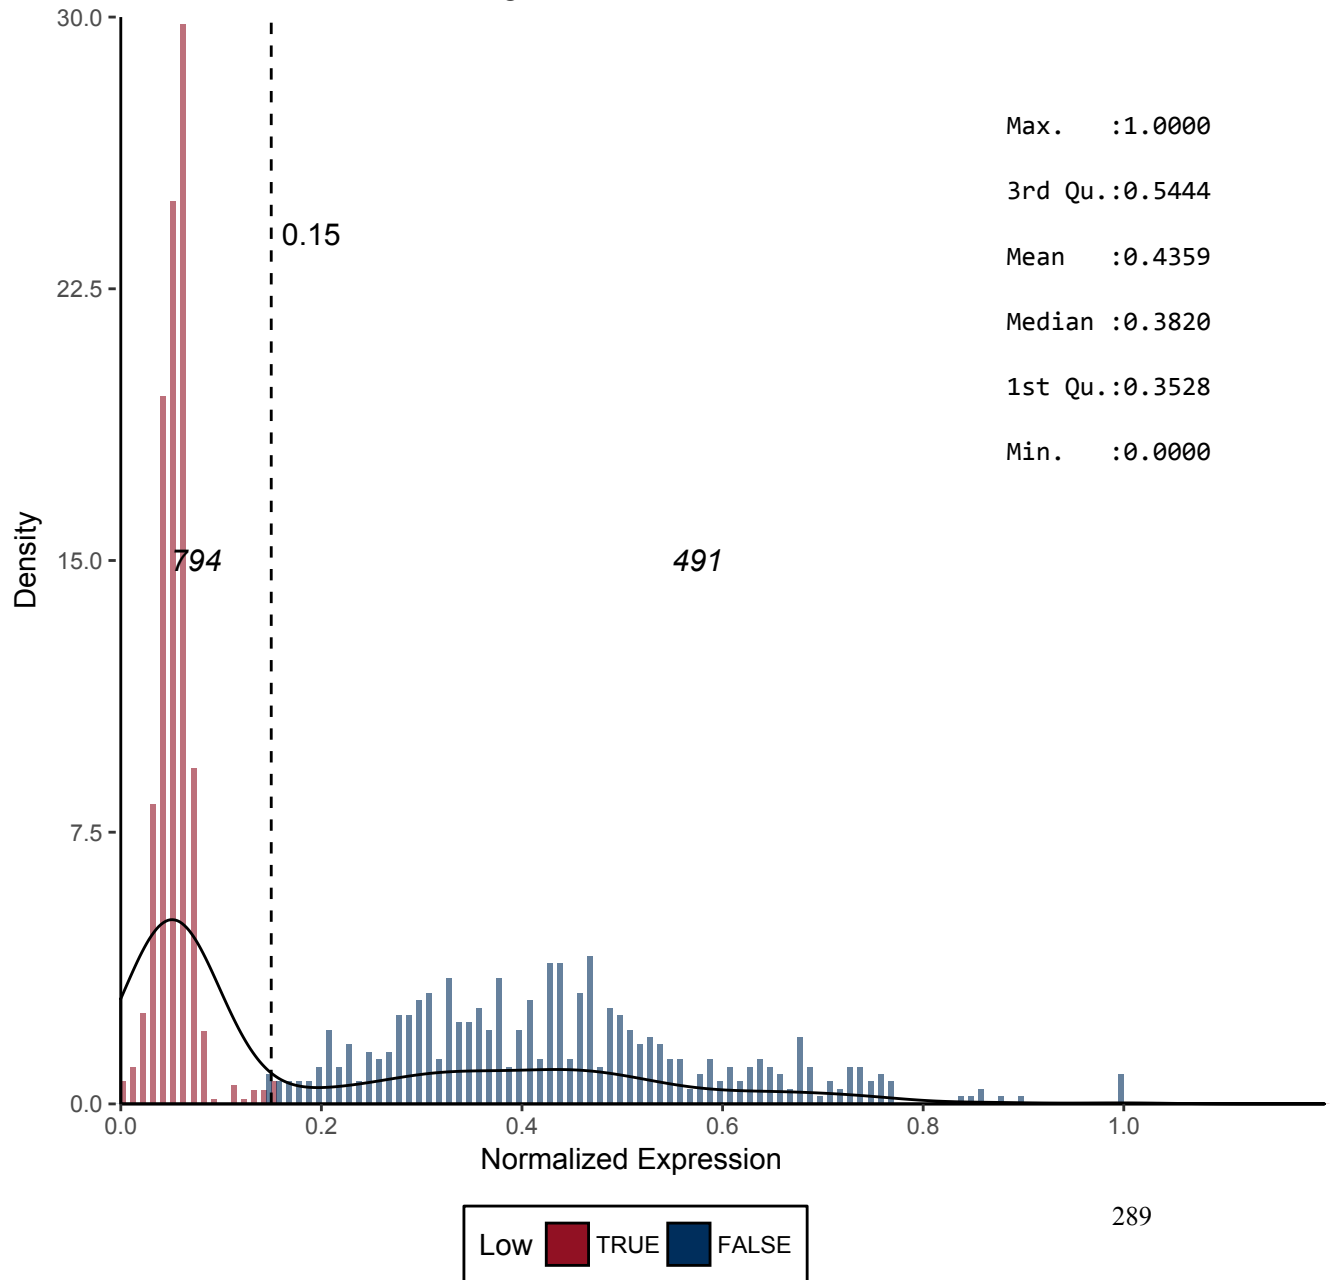

Figure 273 - CD272

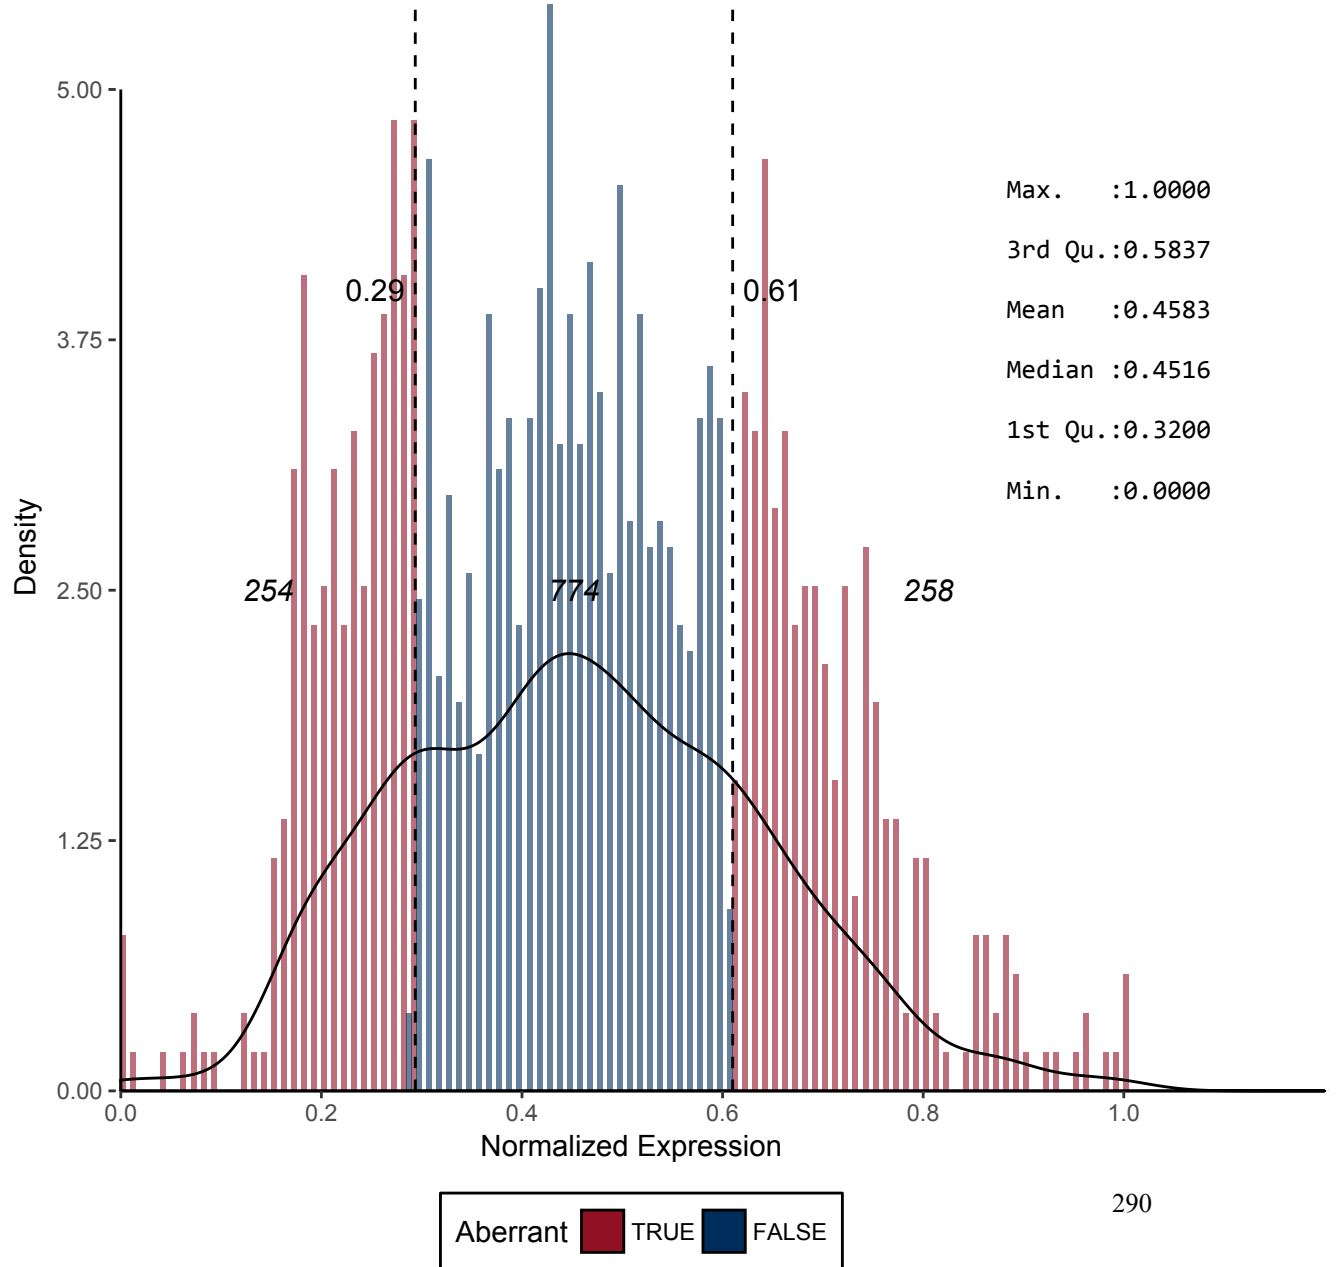

Figure 274 - CD273\*

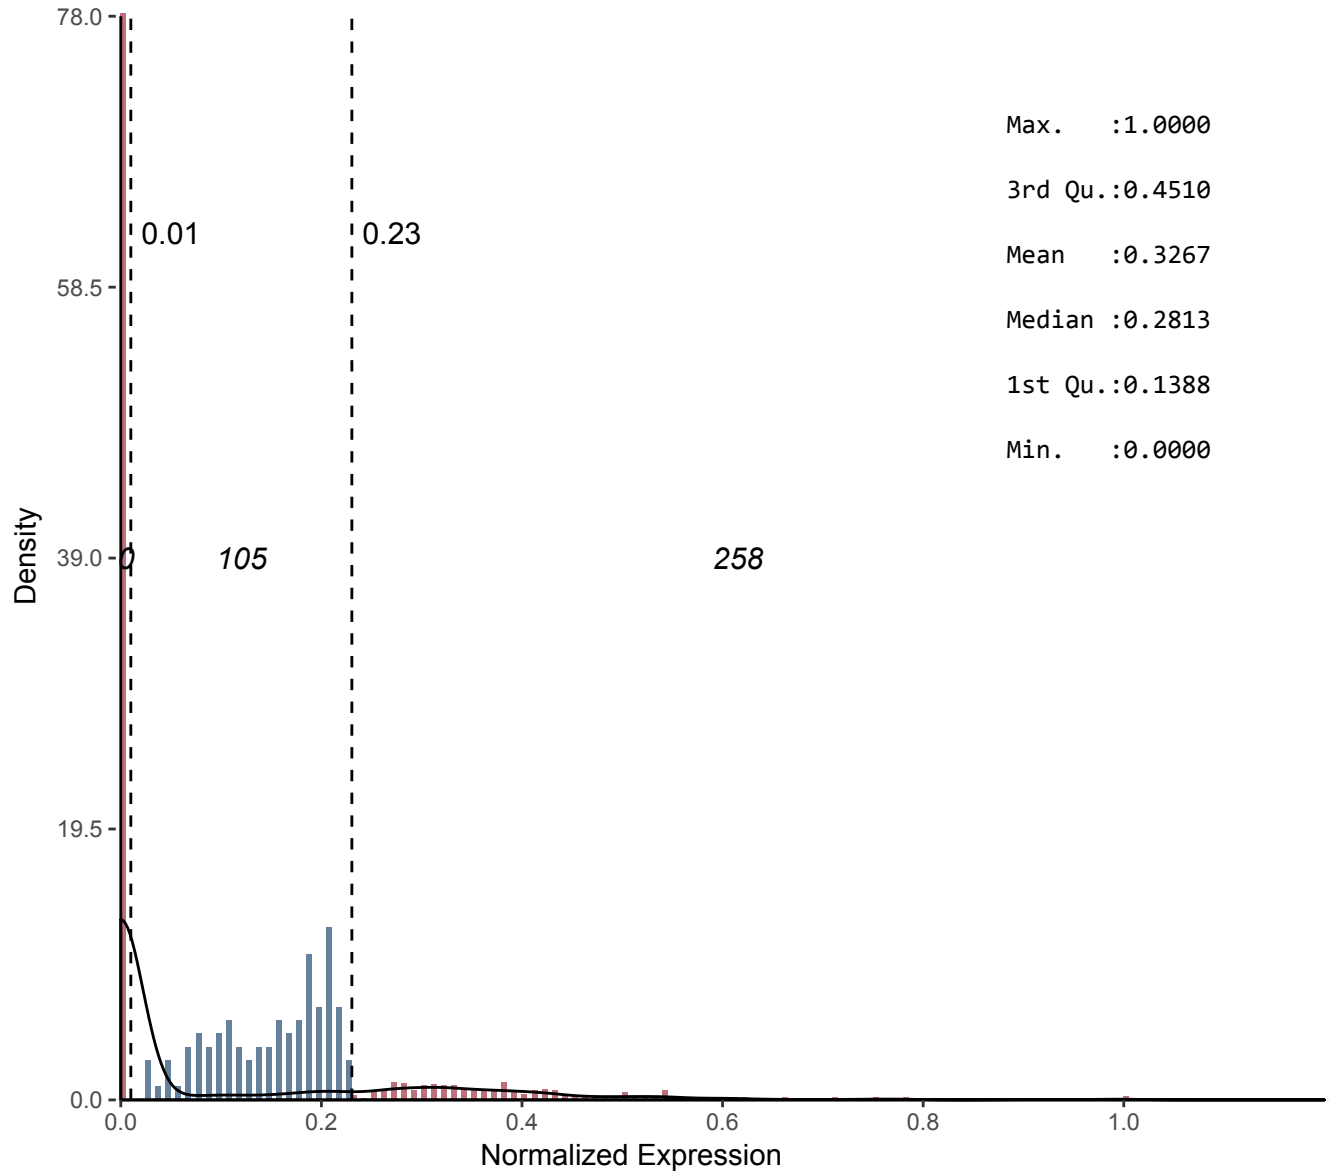

Aberrant TRUE FALSE

Figure 275 - CD274\*

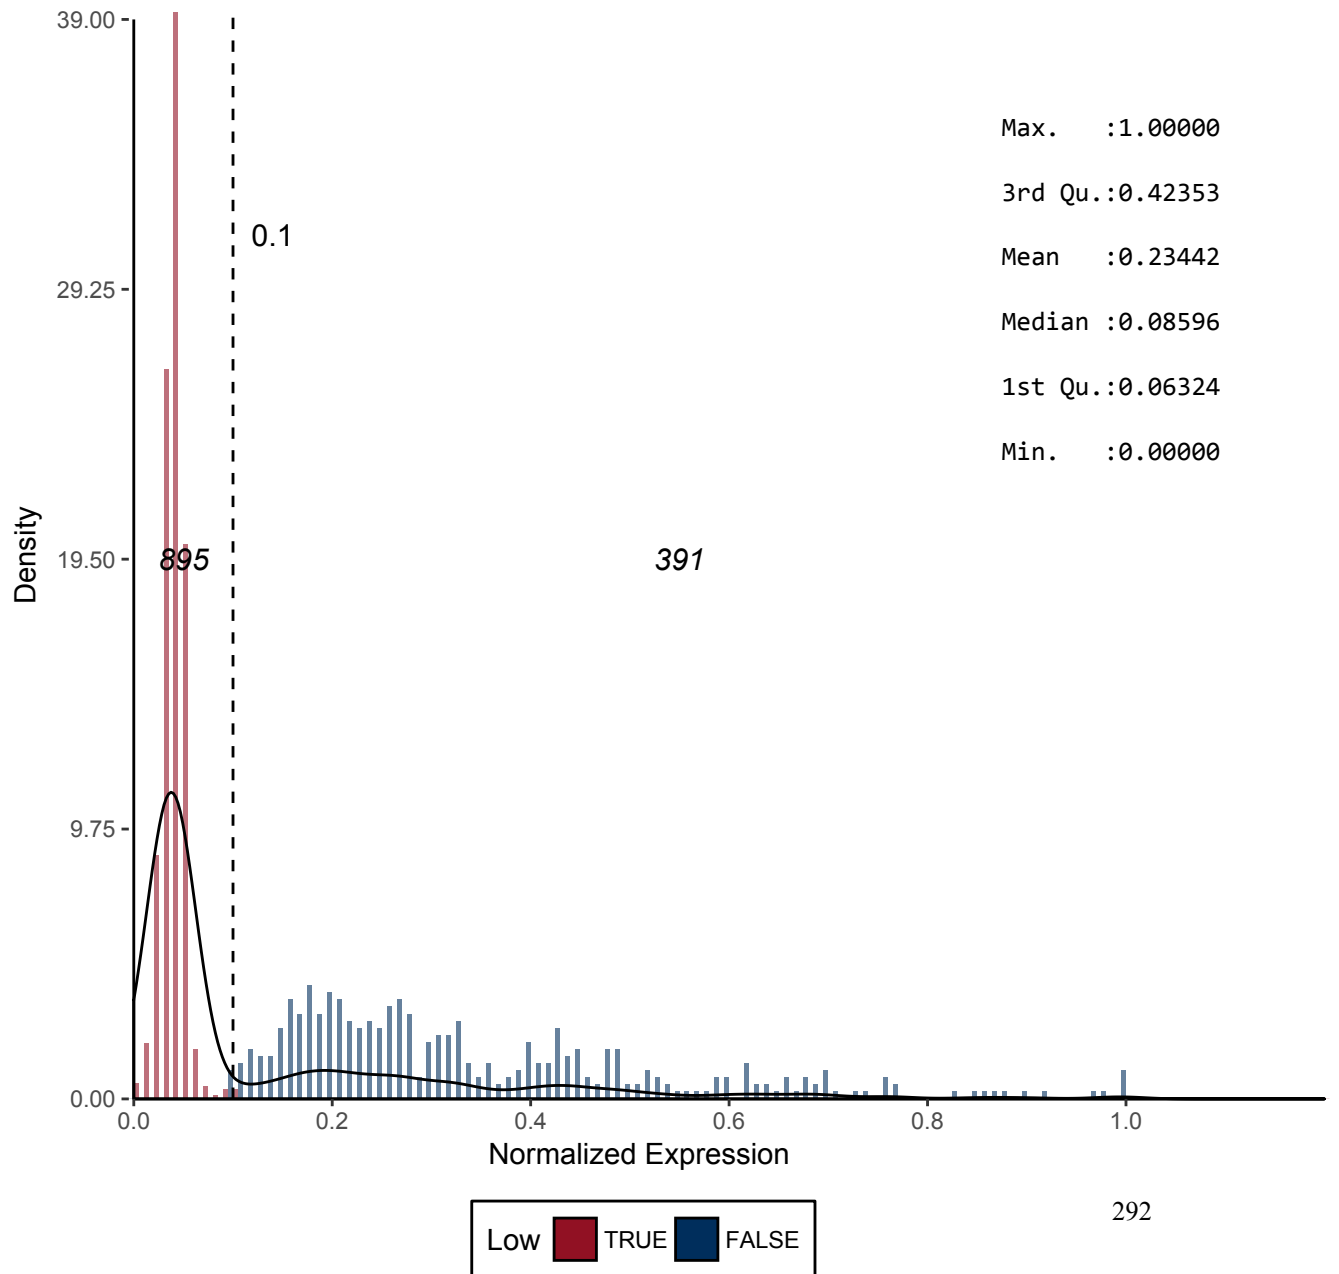

Figure 276 - CD276\*

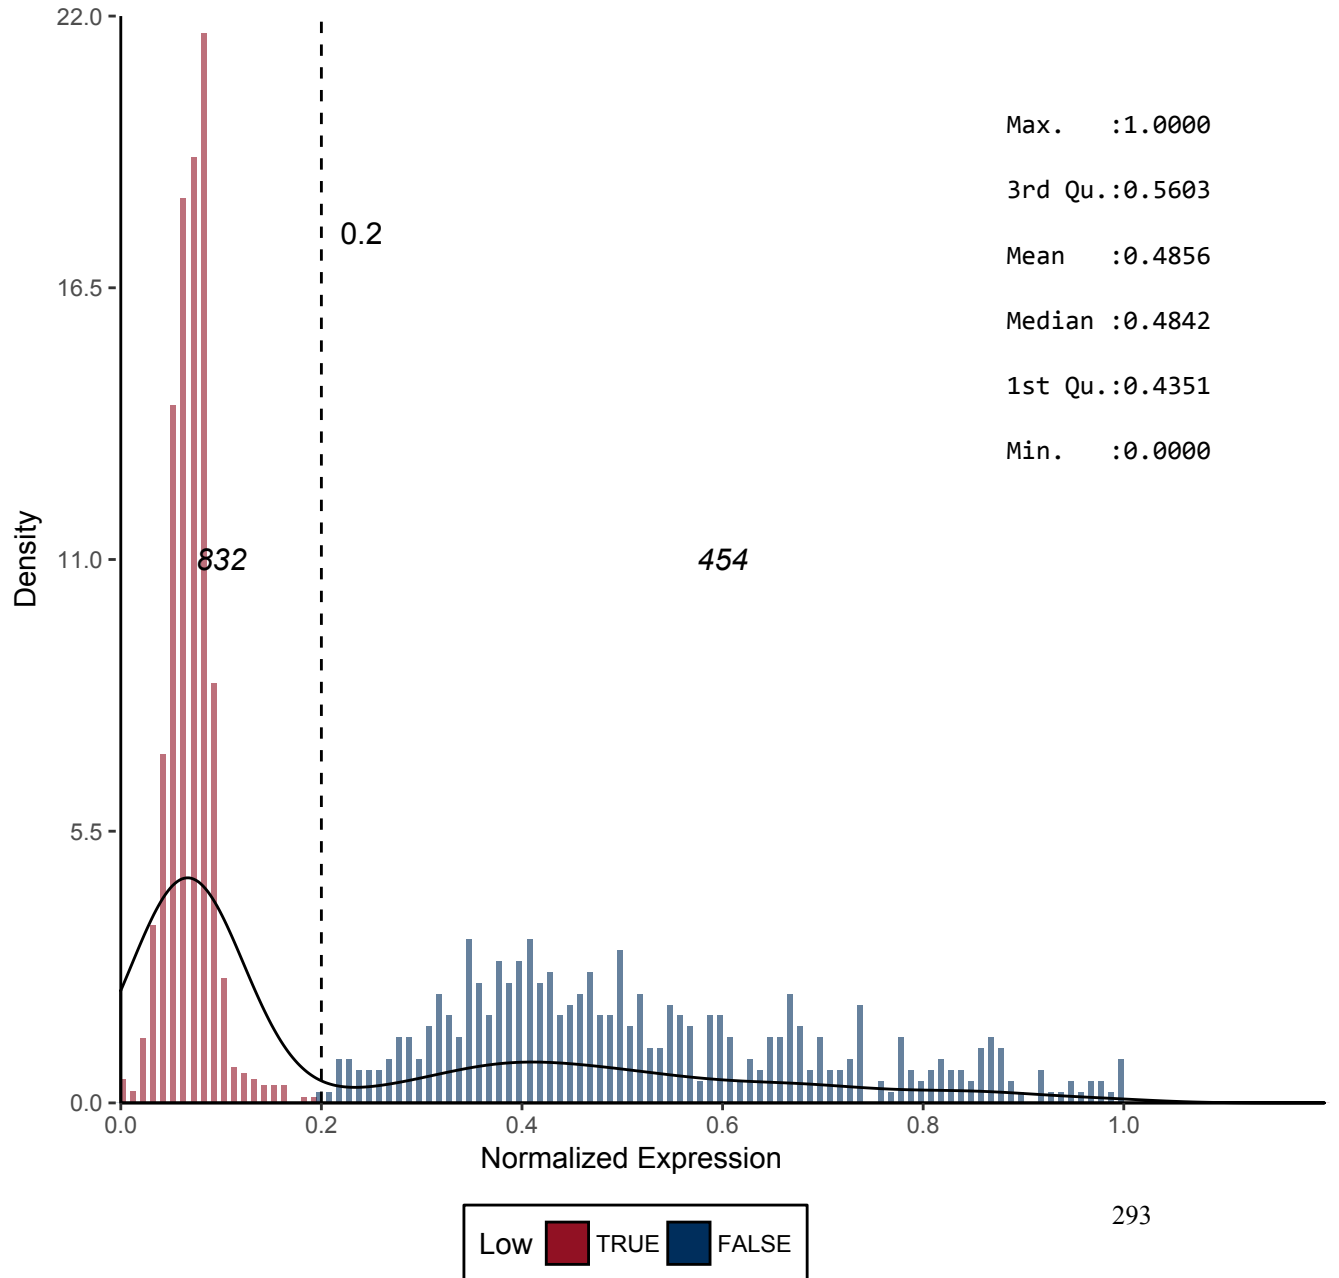

Figure 277 - CD277

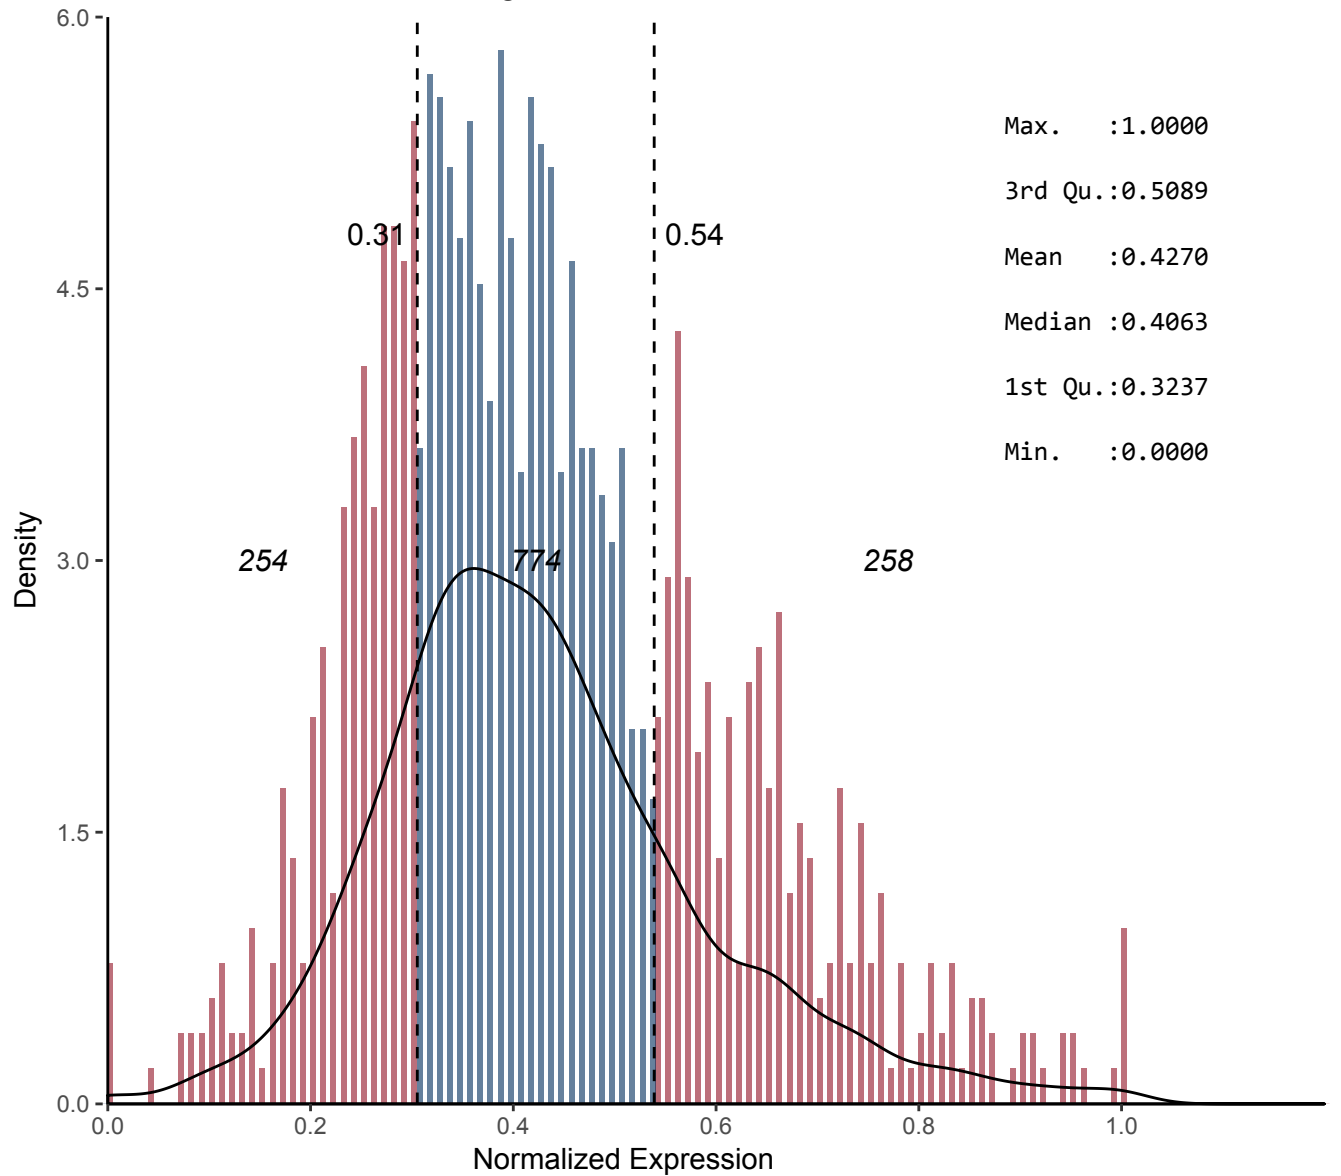

Aberrant TRUE FALSE

Figure 278 - CD278

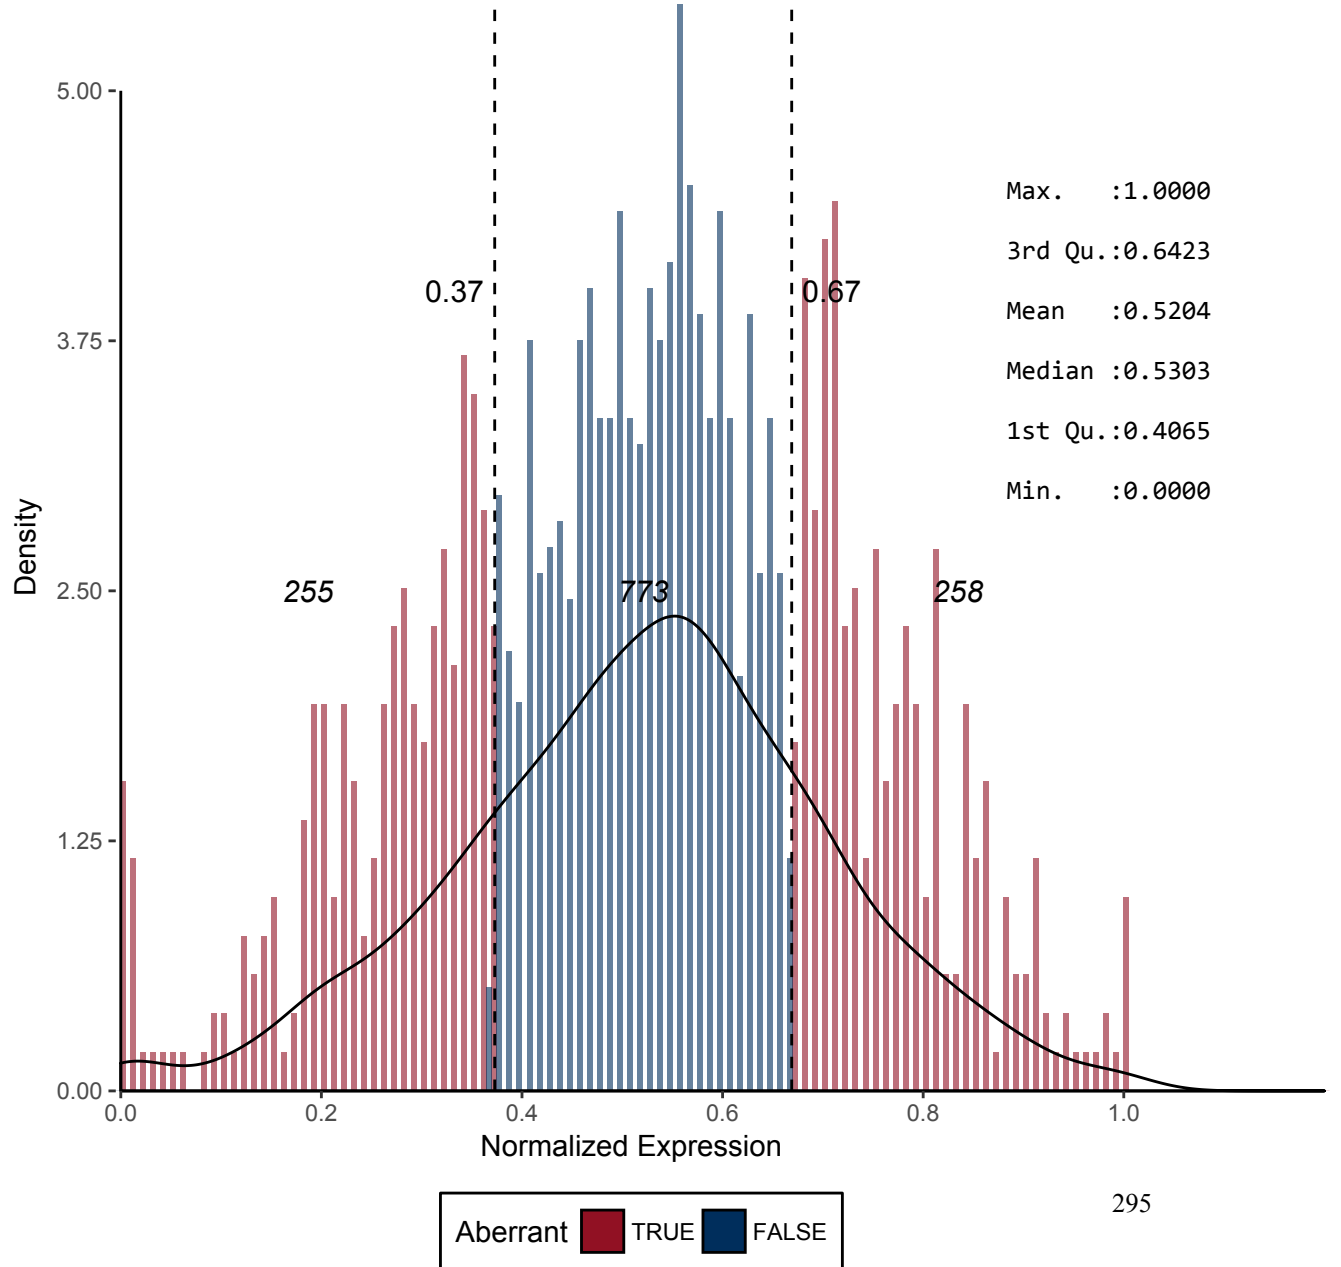

Figure 279 - CD279\*

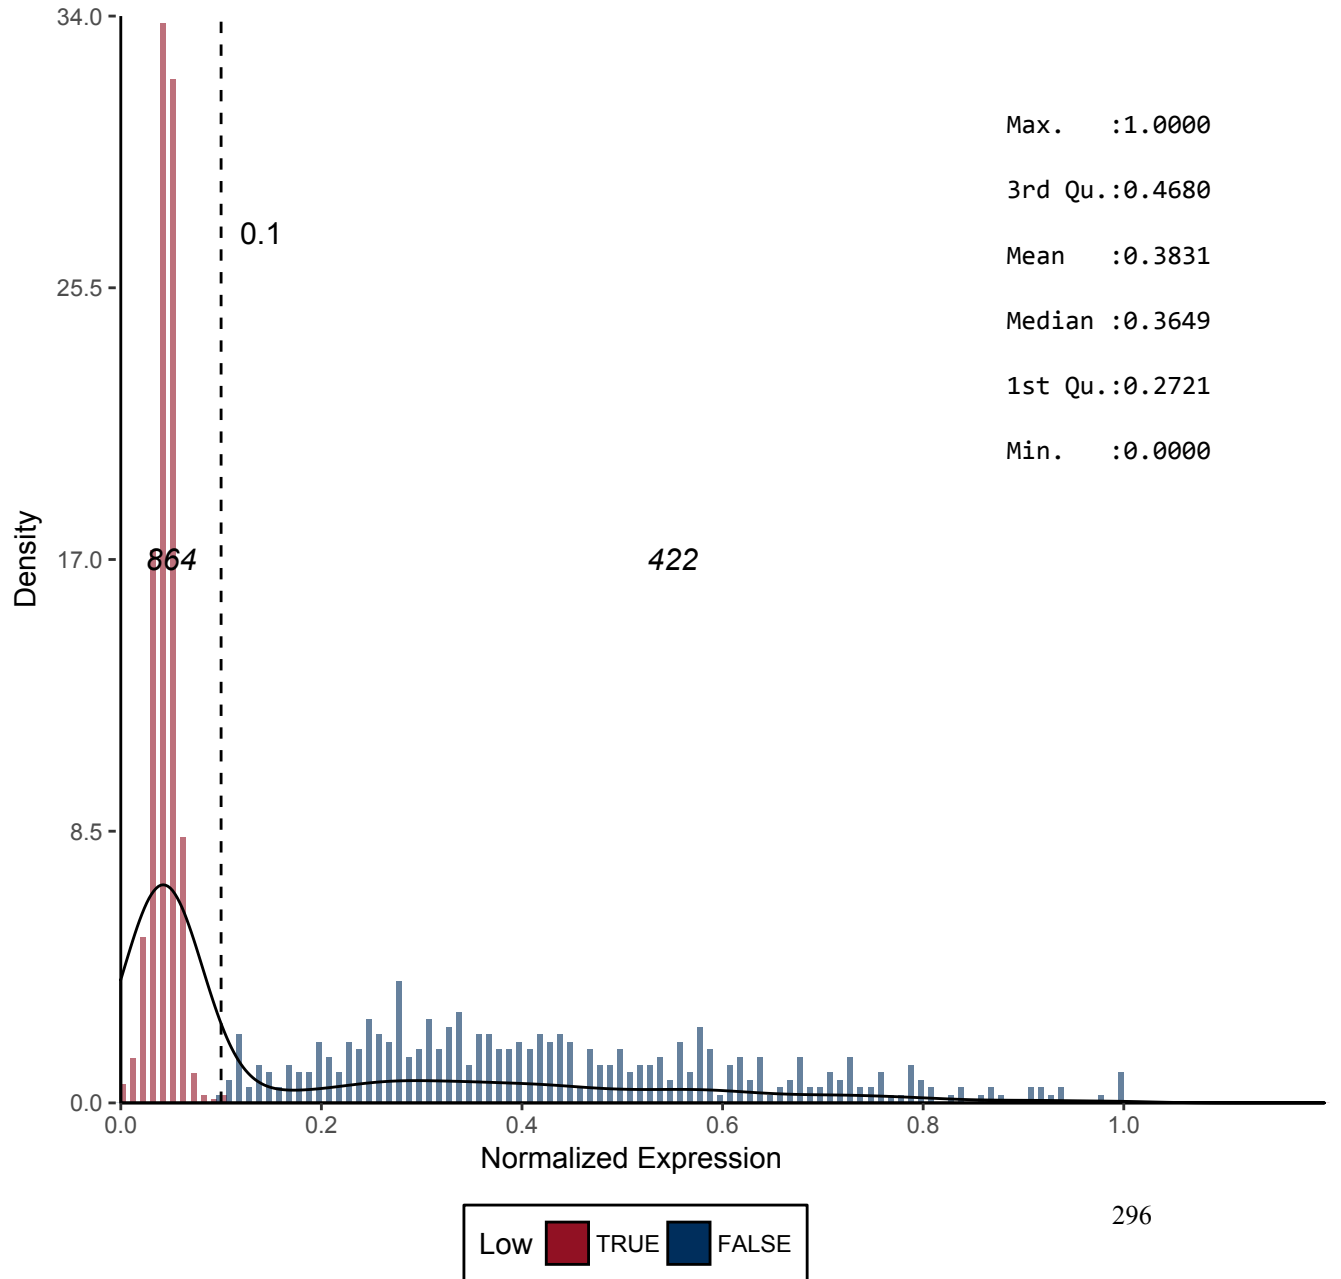



Figure 280 - CD280\*

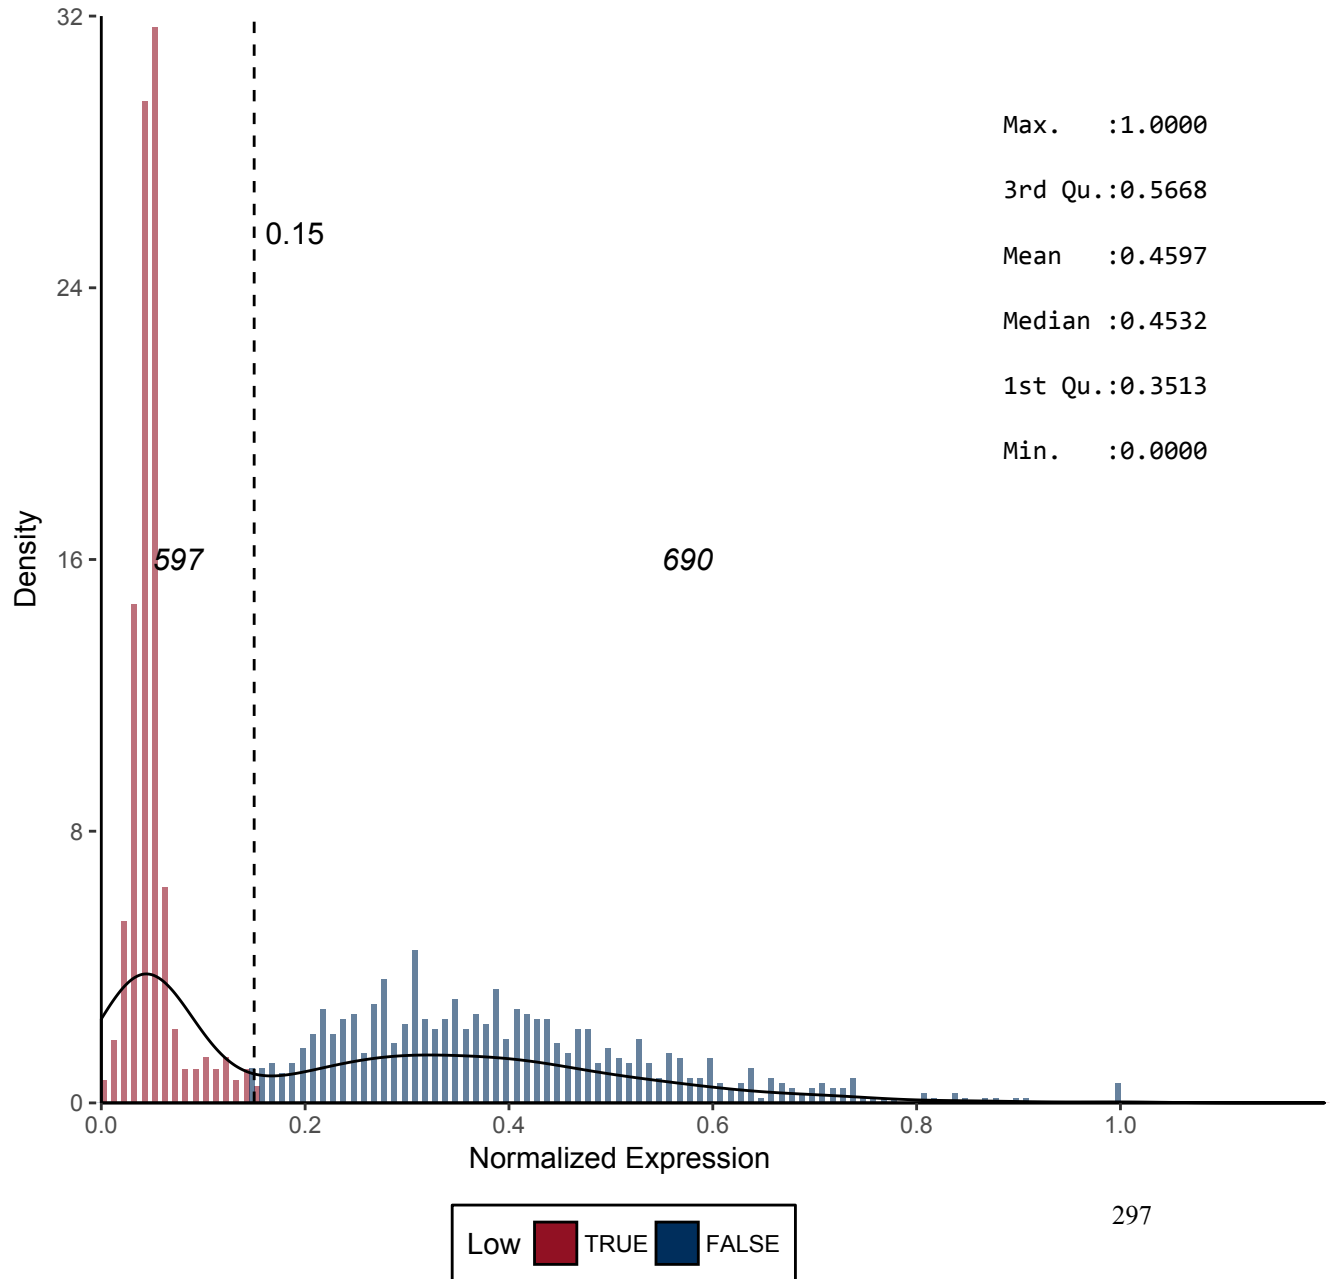

Figure 281 - CD281

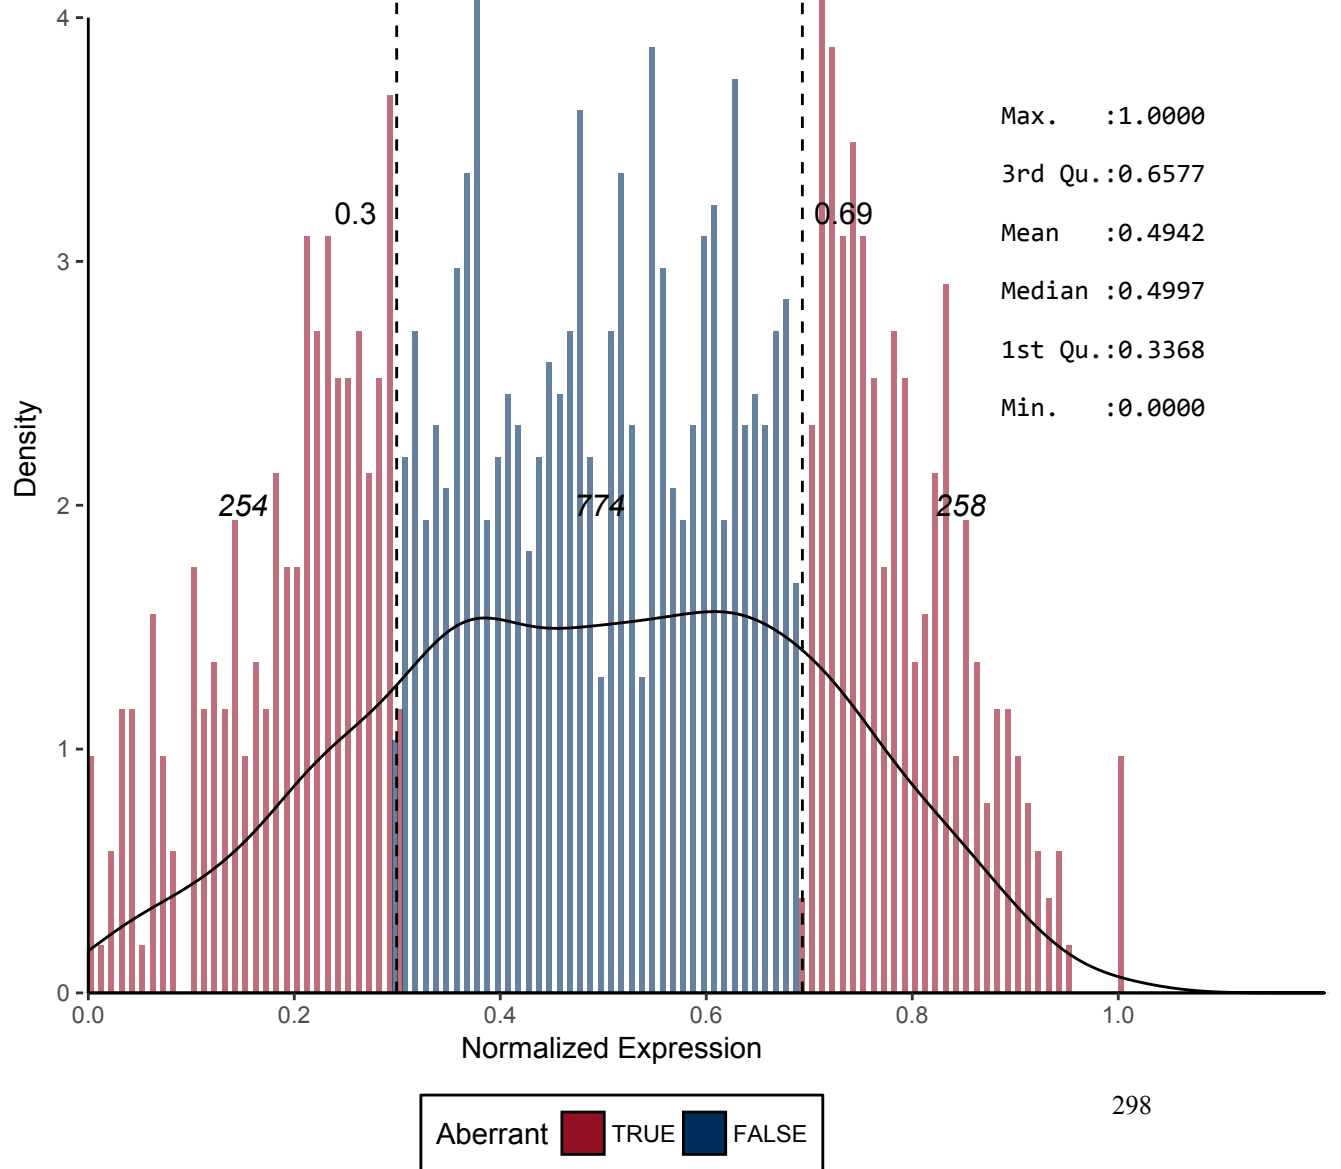

Figure 282 - CD282

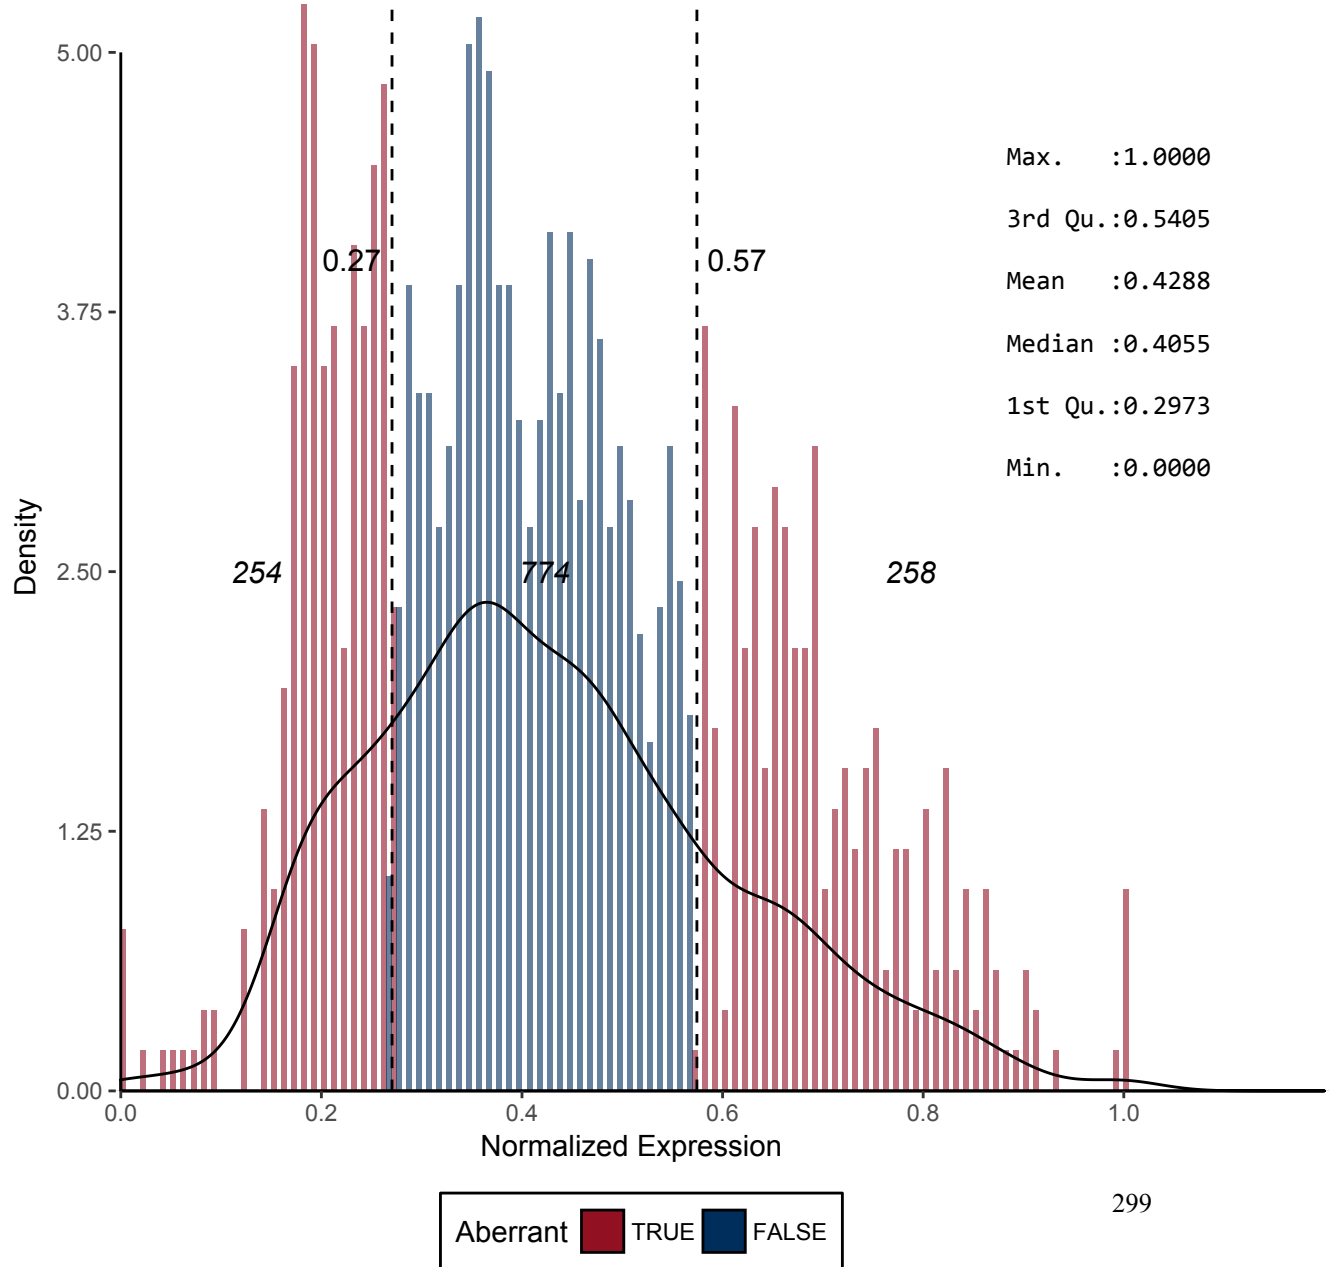

Figure 283 - CD283\*

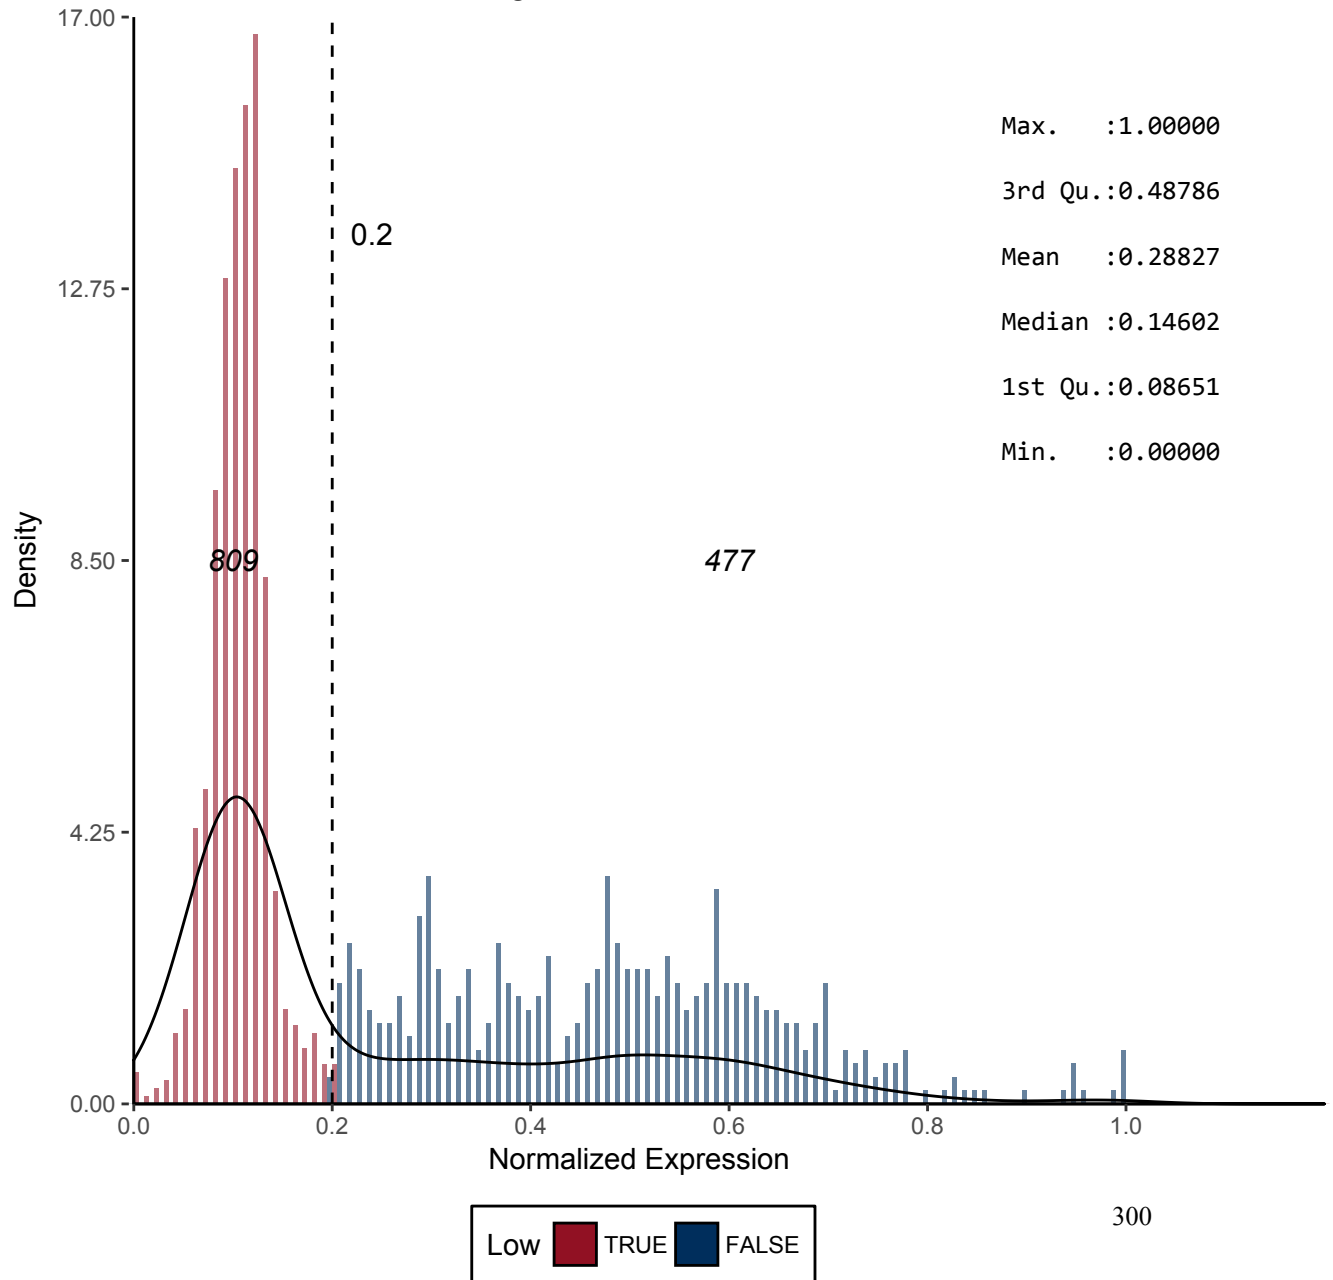

Figure 284 - CD284

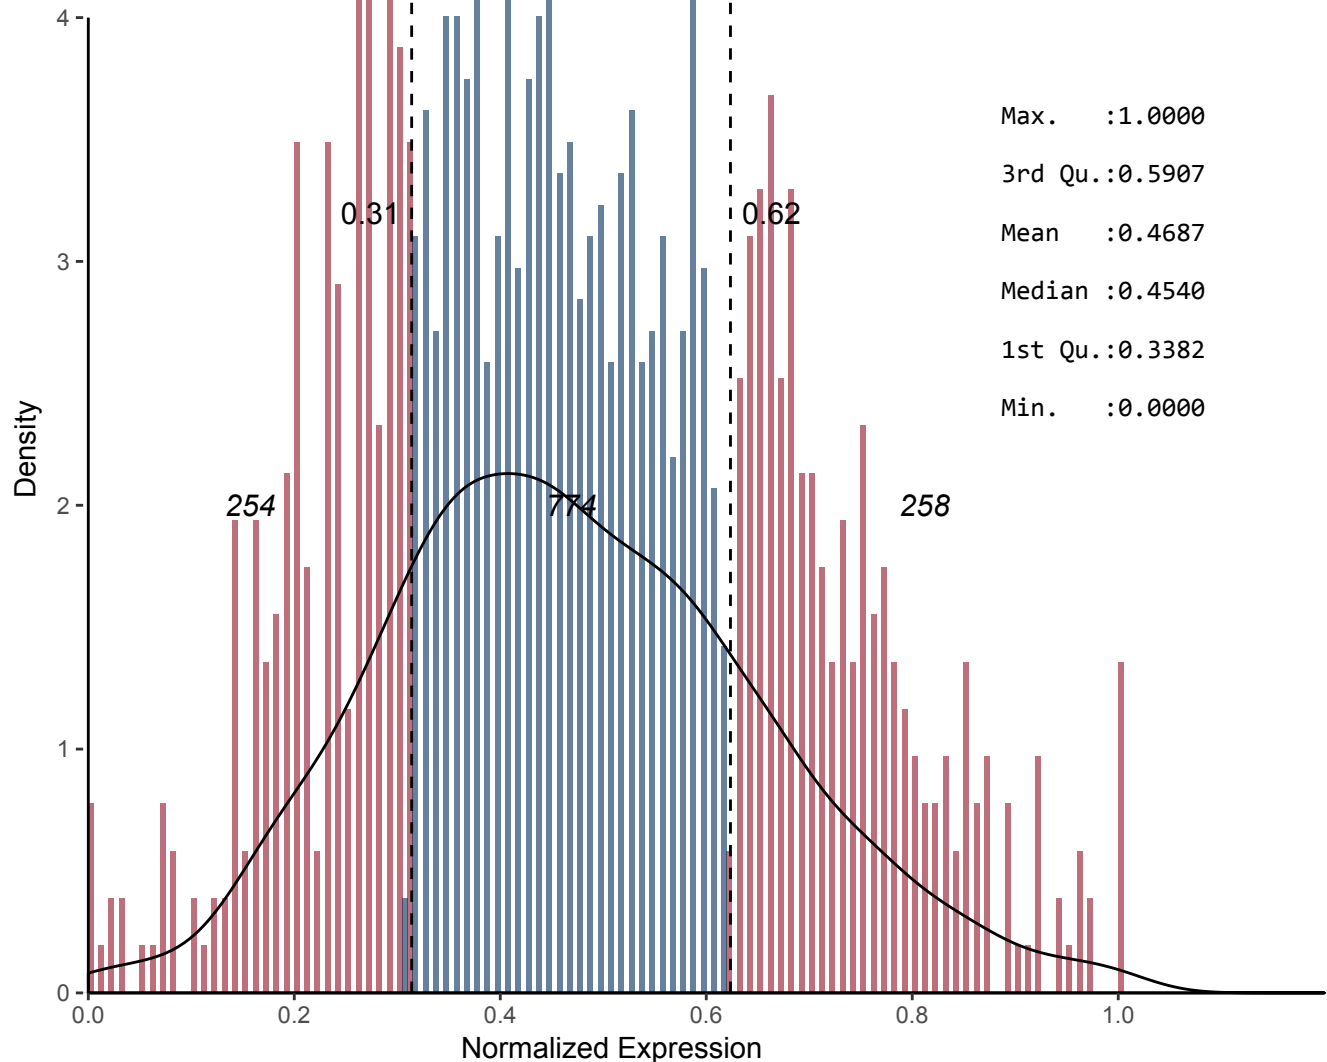

Aberrant TRUE FALSE

Figure 285 - CD286

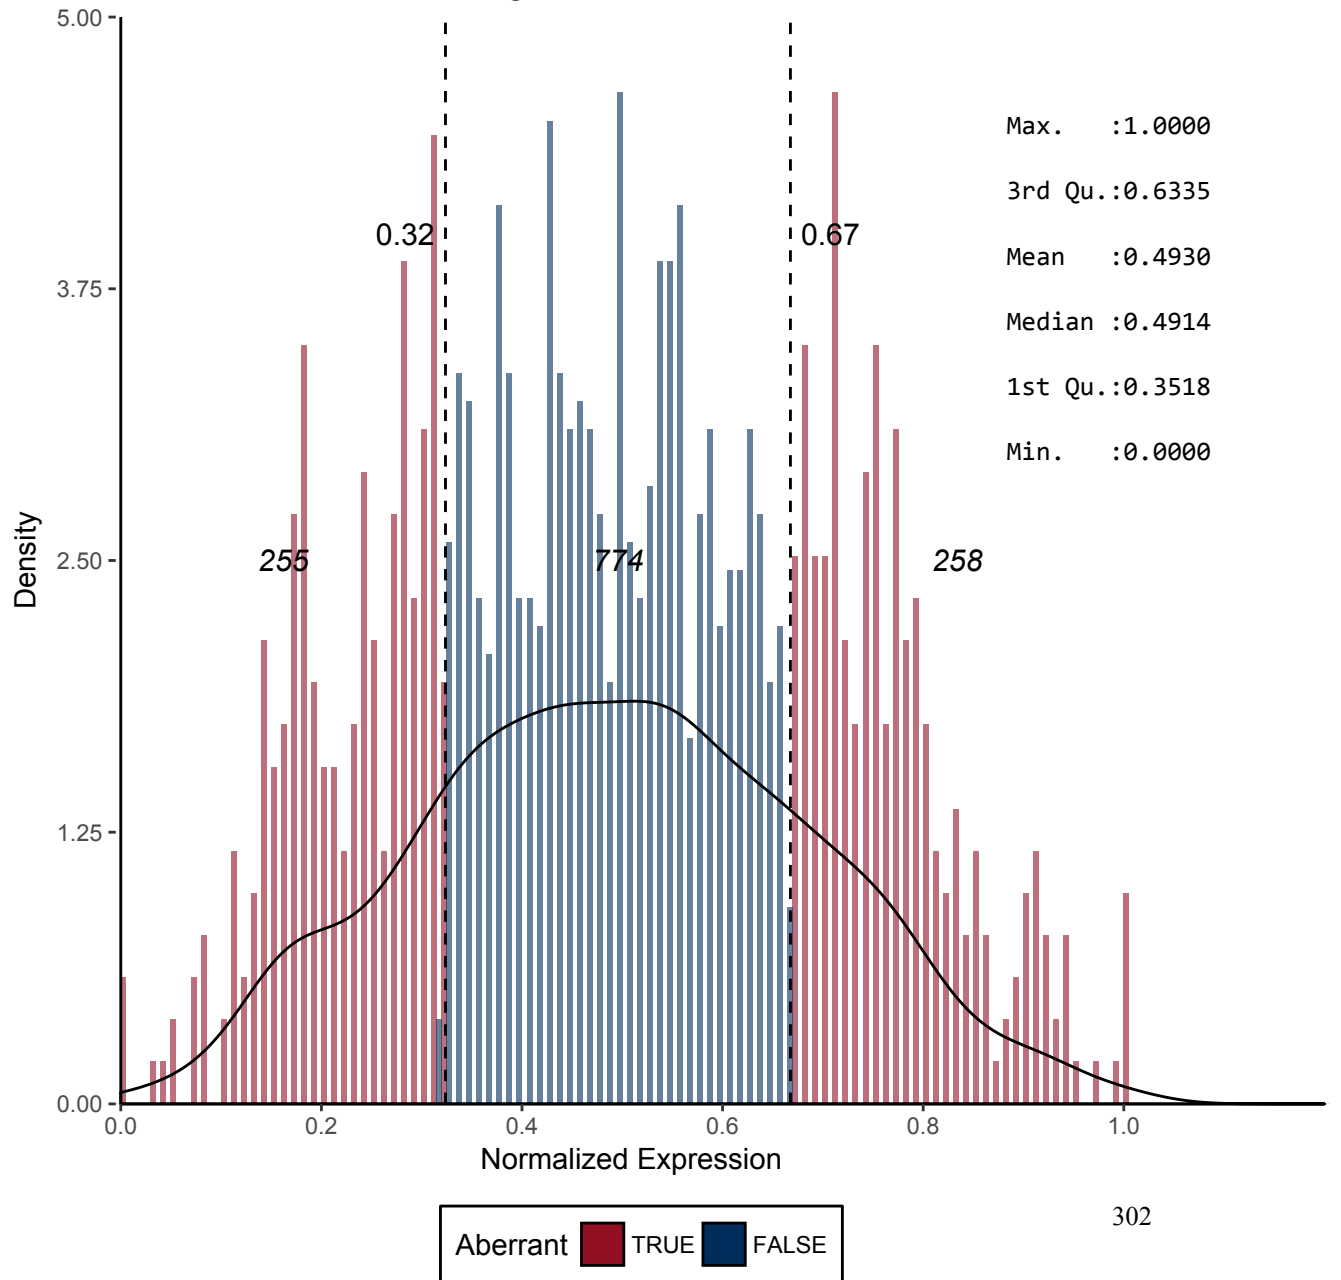

Figure 286 - CD288

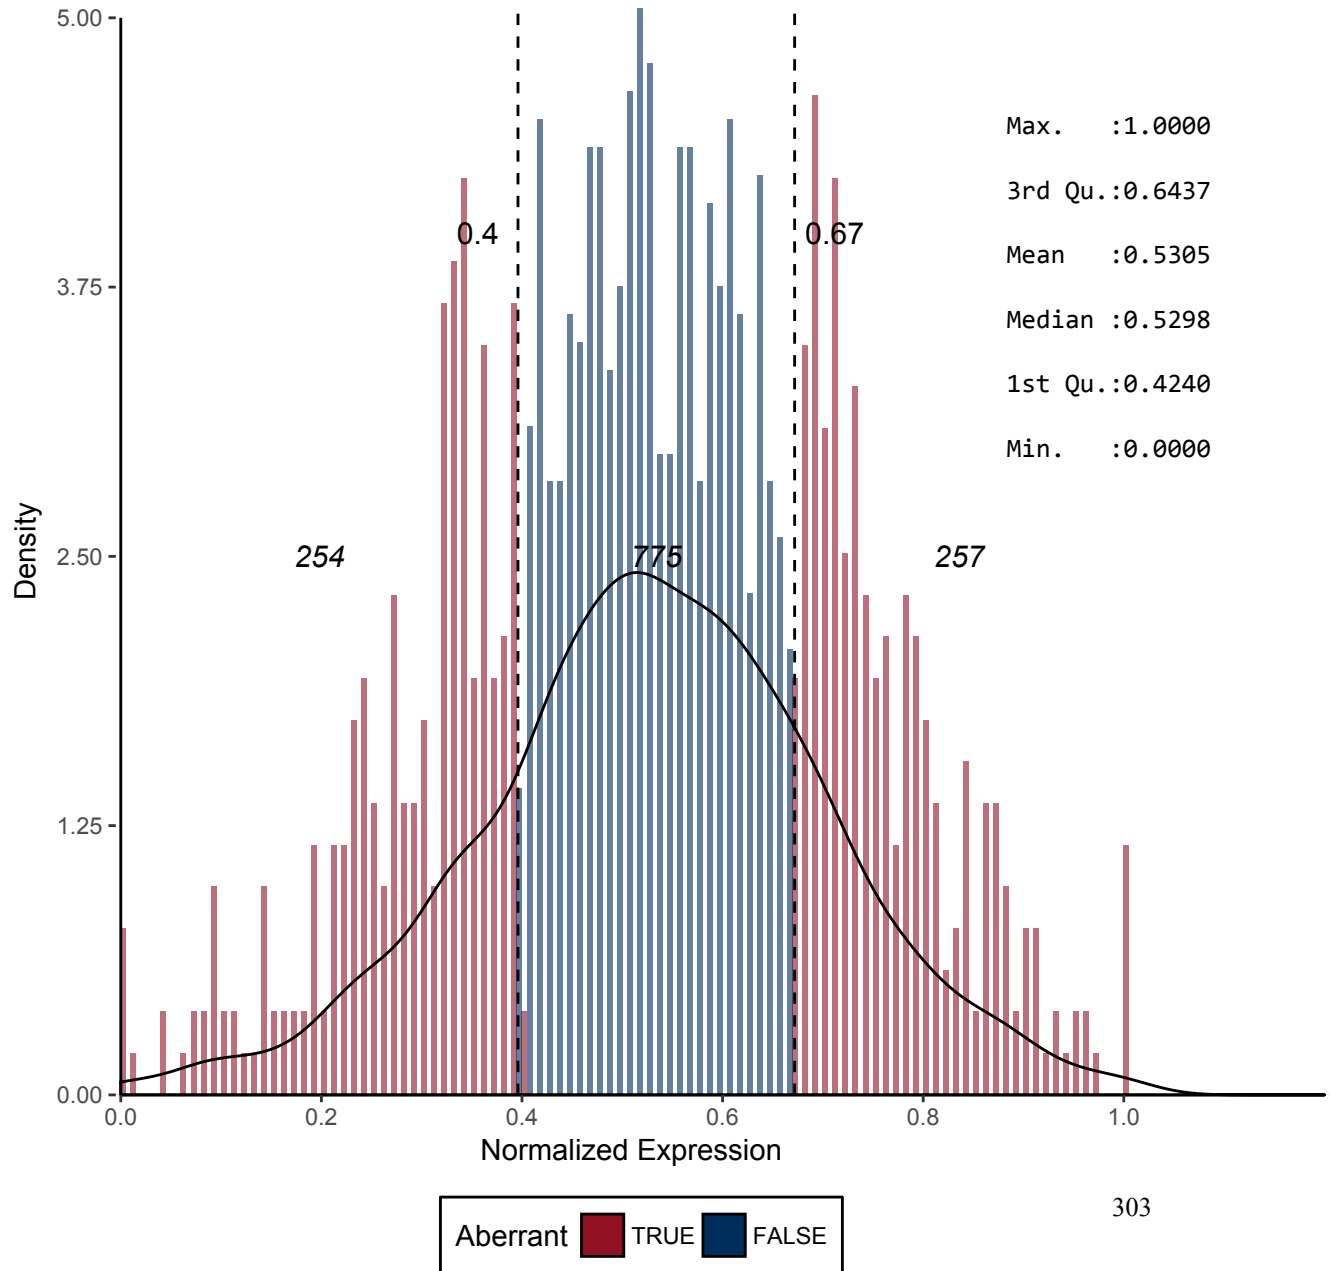

Figure 287 - CD289

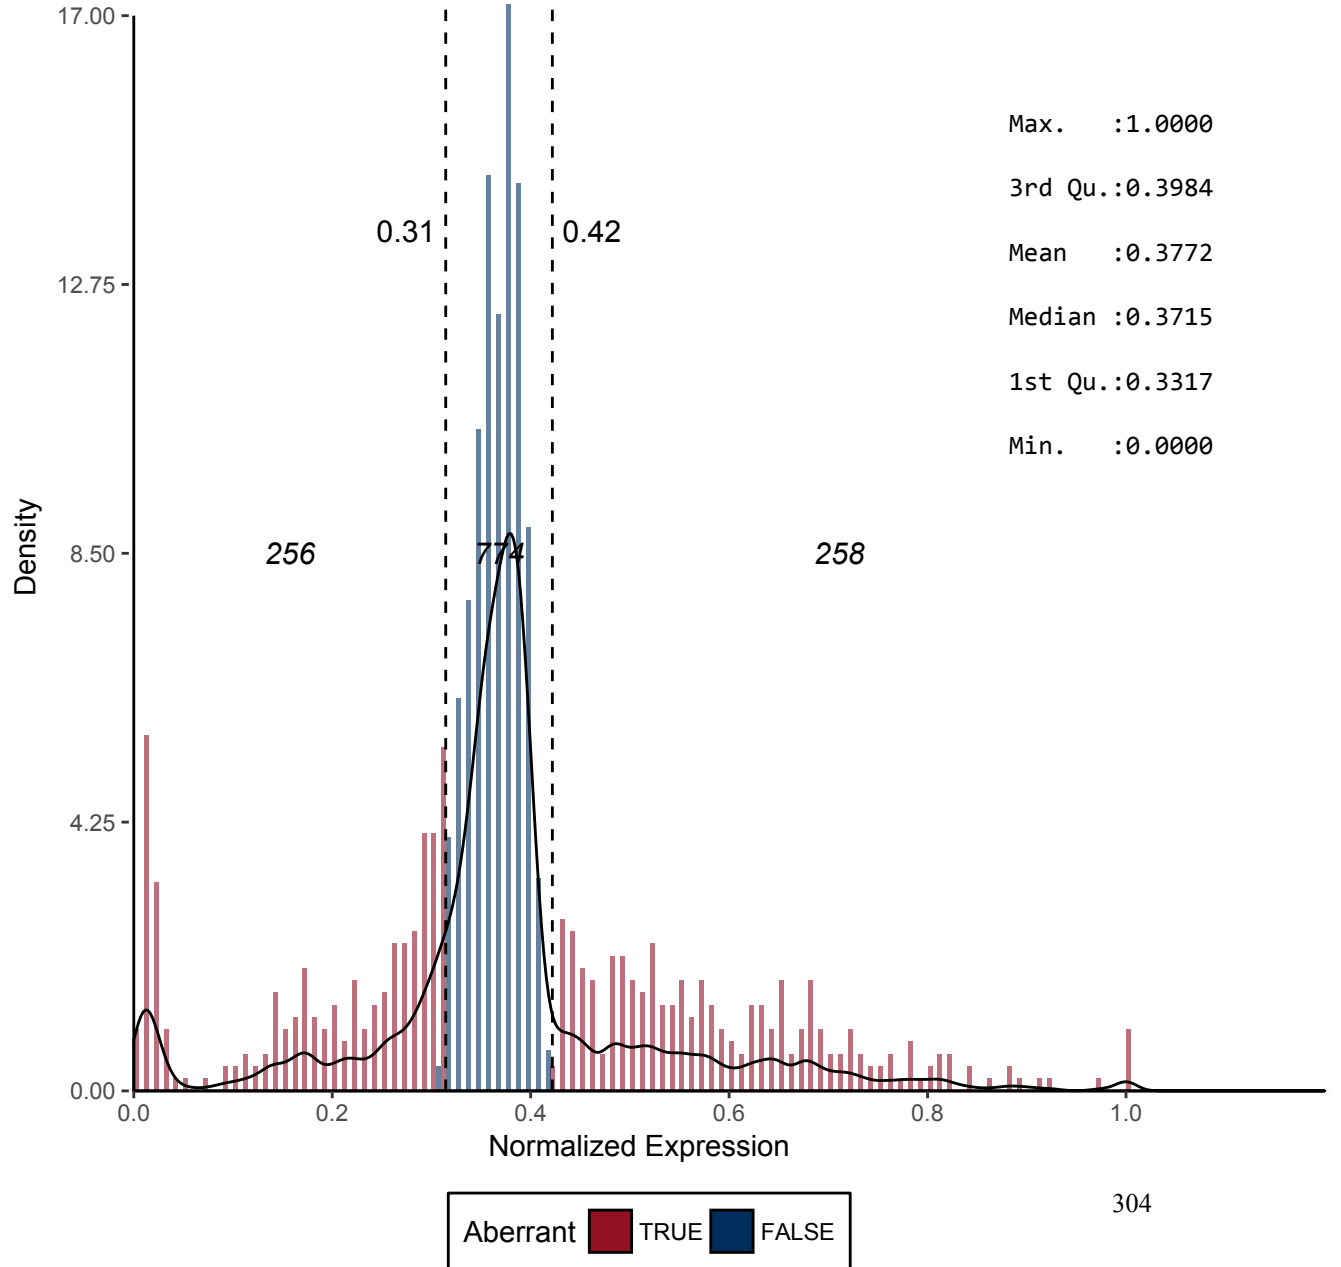



Figure 288 - CD290

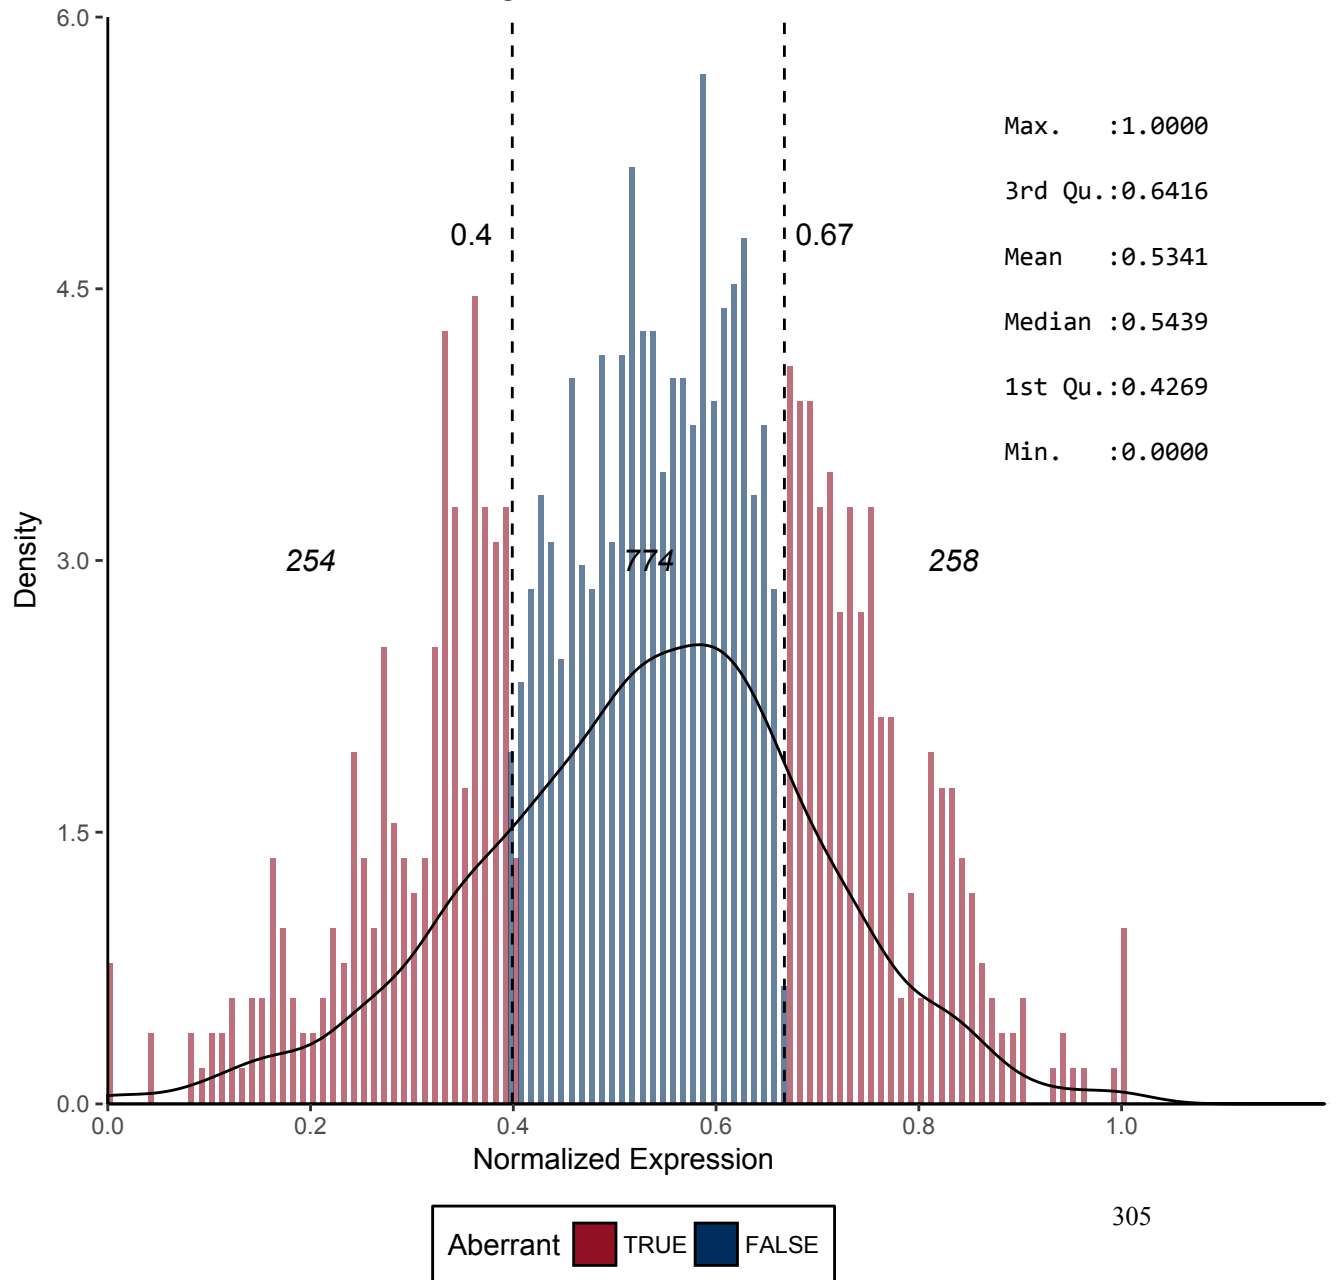

Figure 289 - CD292\*

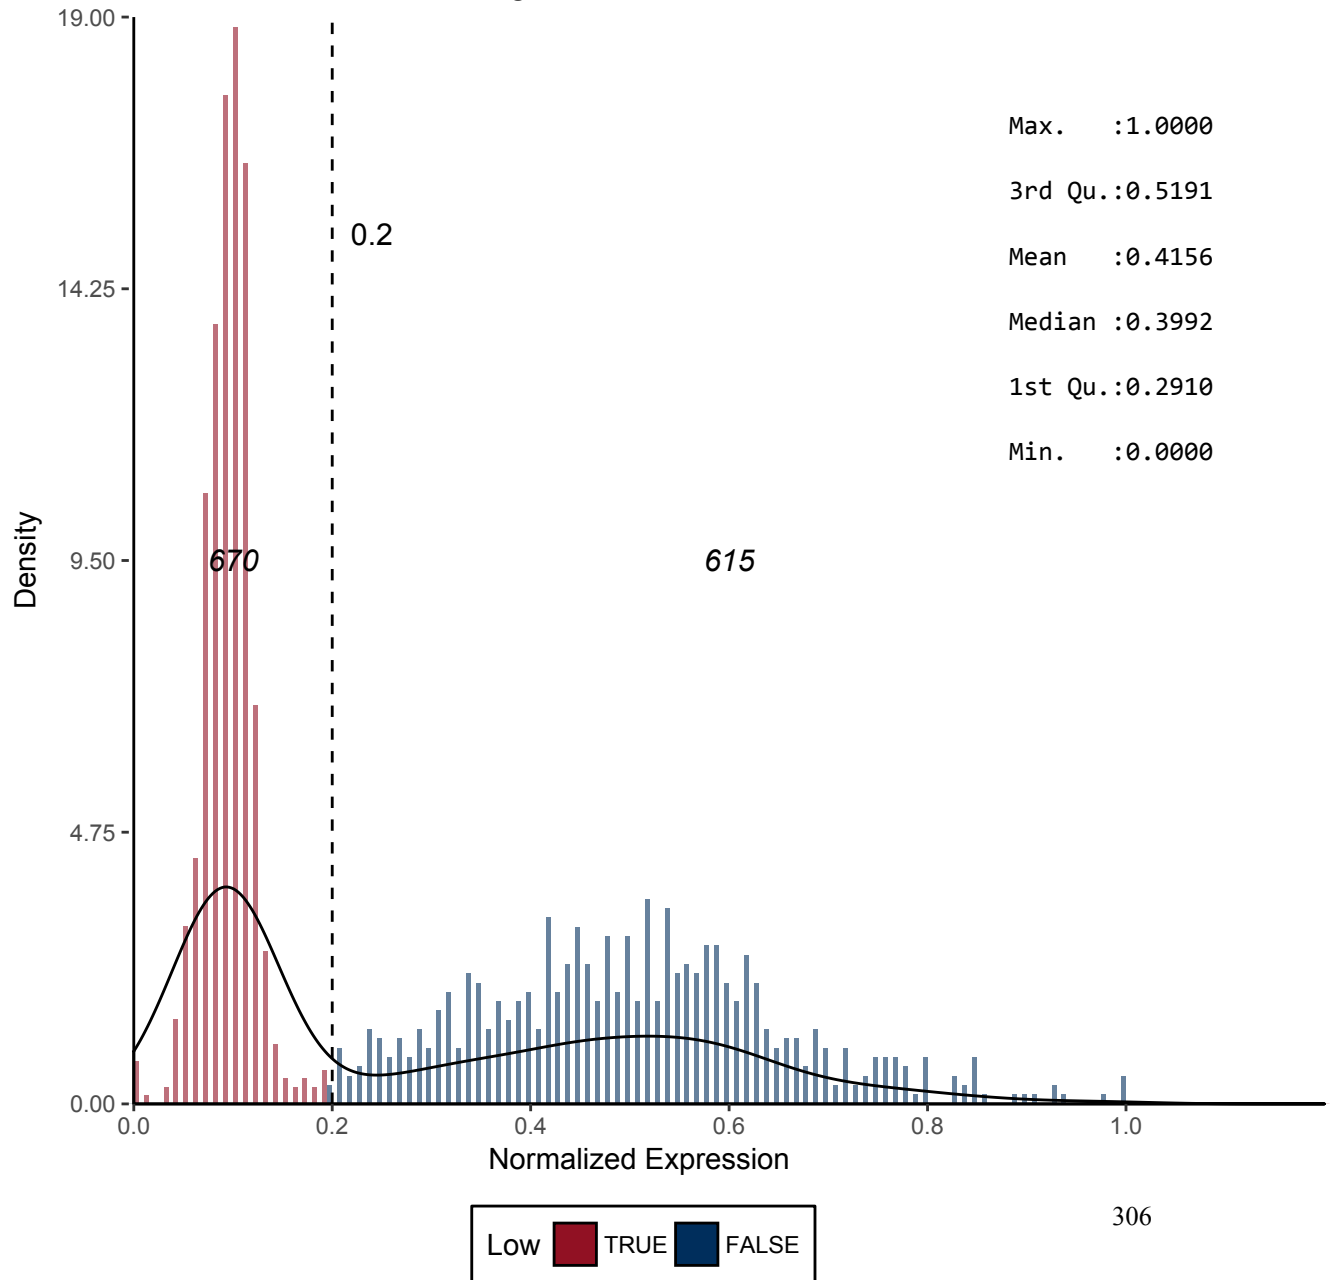

Figure 290 - CDW293\*

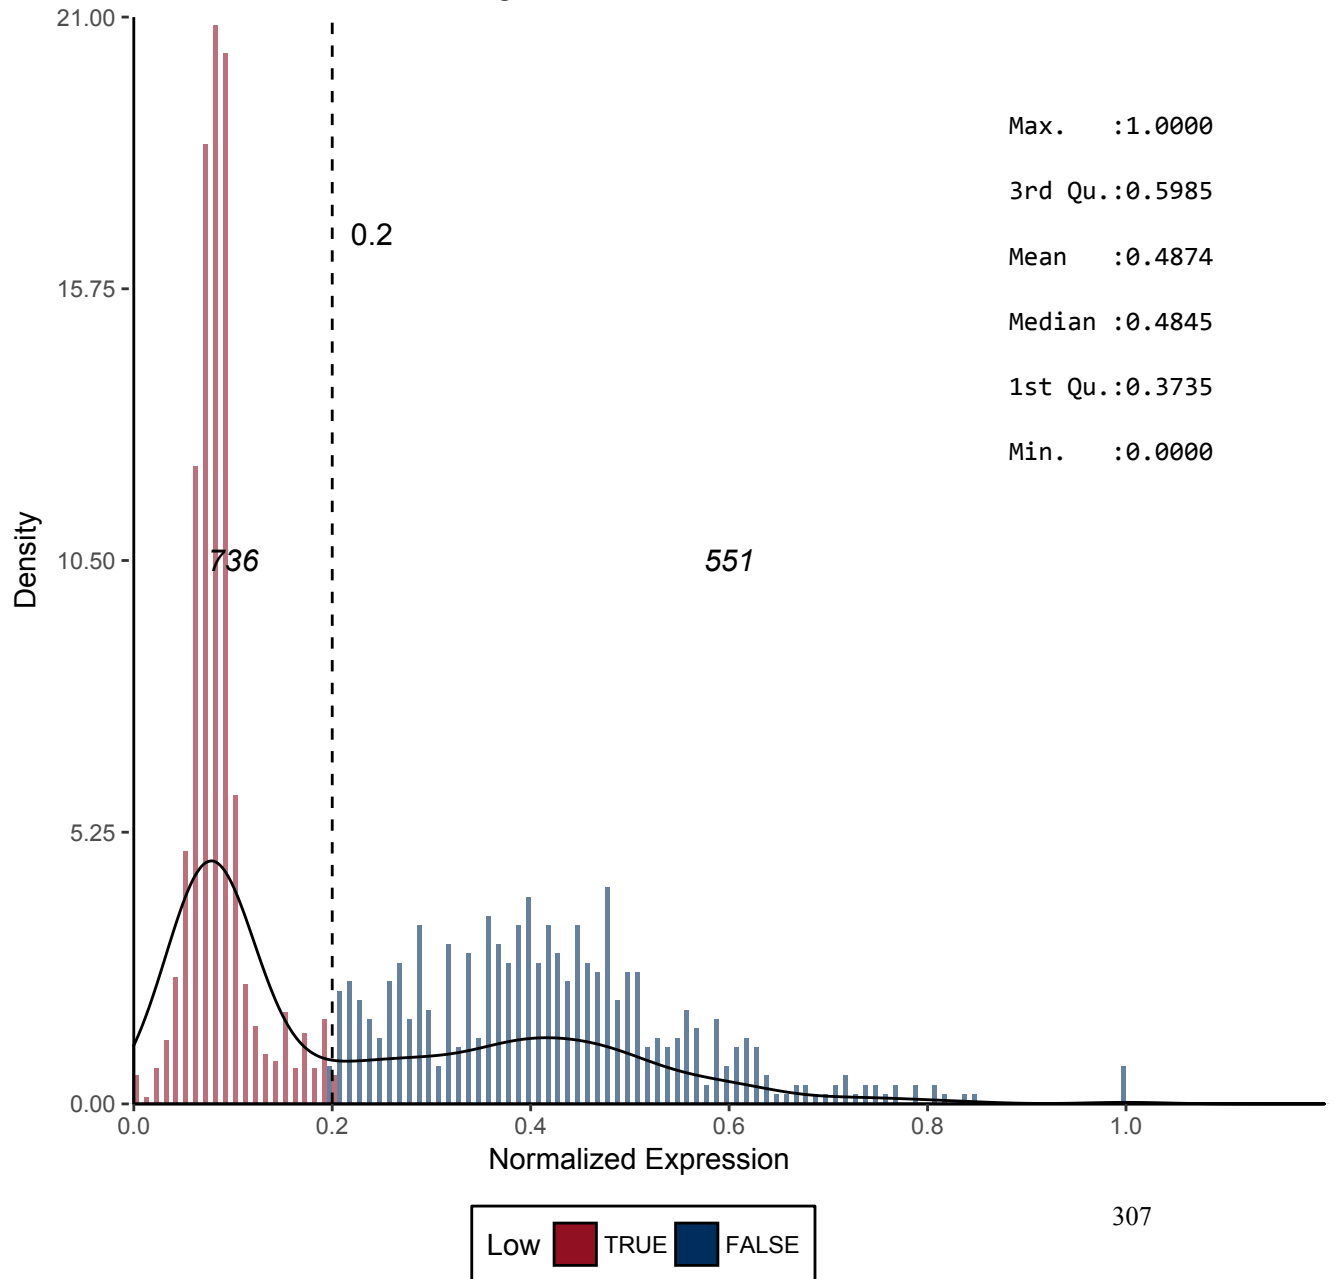

Figure 291 - CD294

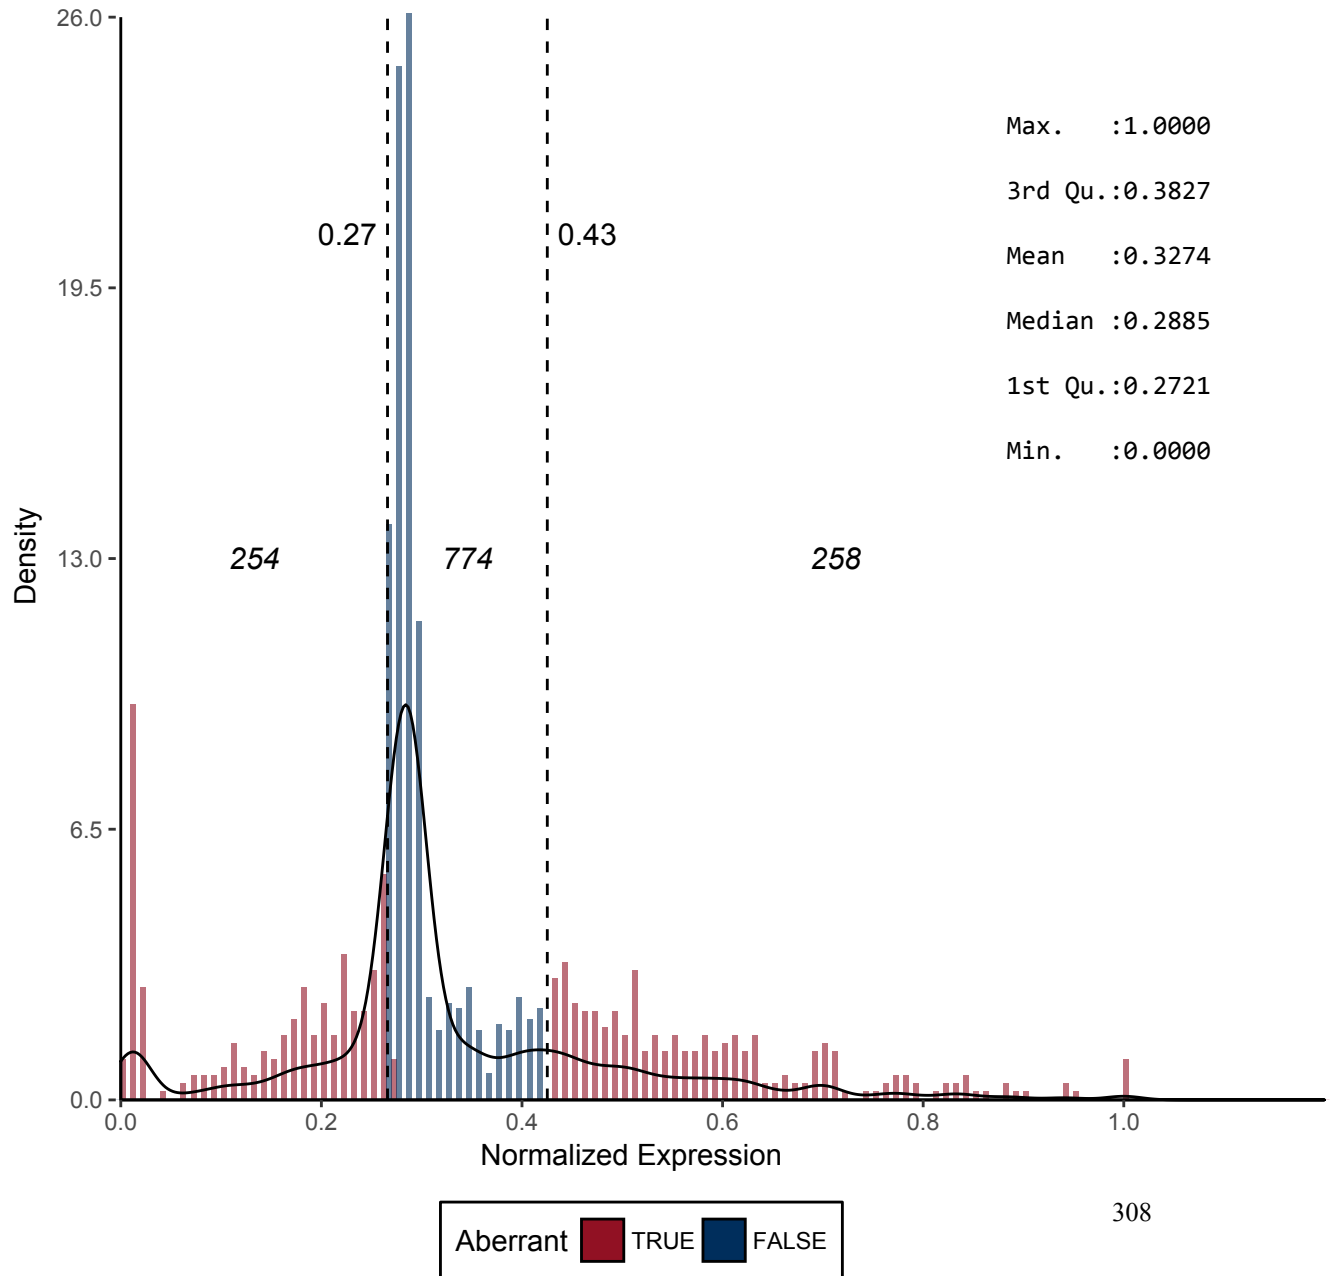

Figure 292 - CD295

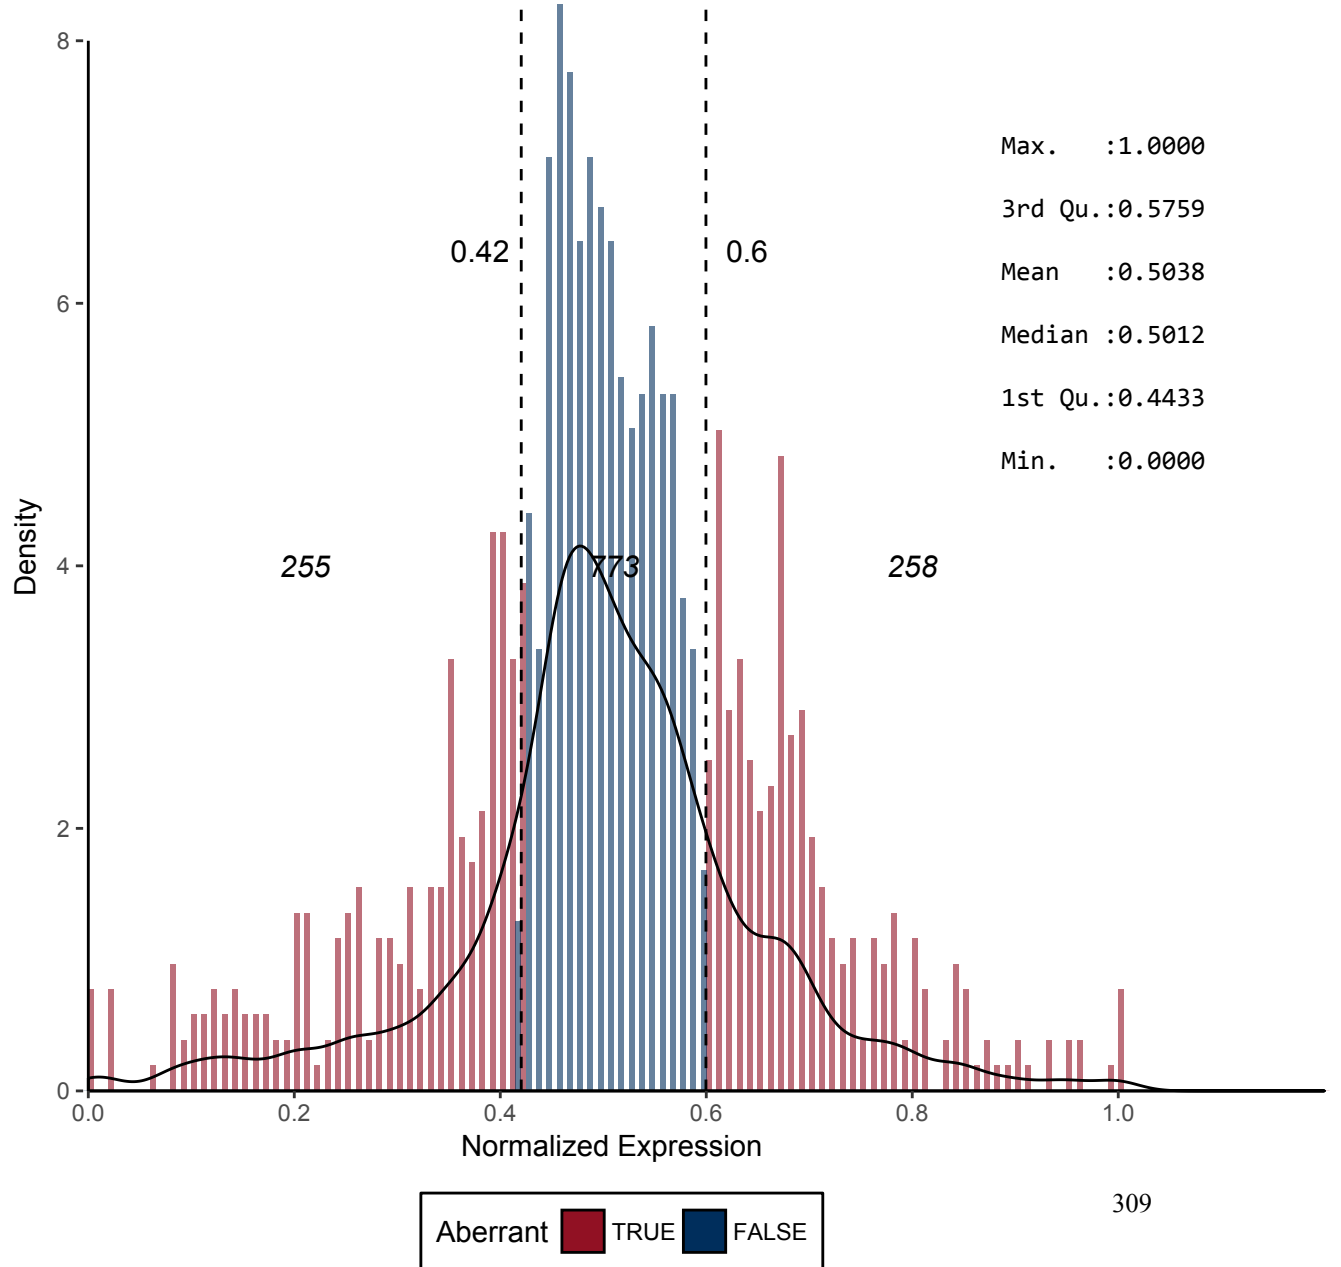

Figure 293 - CD296

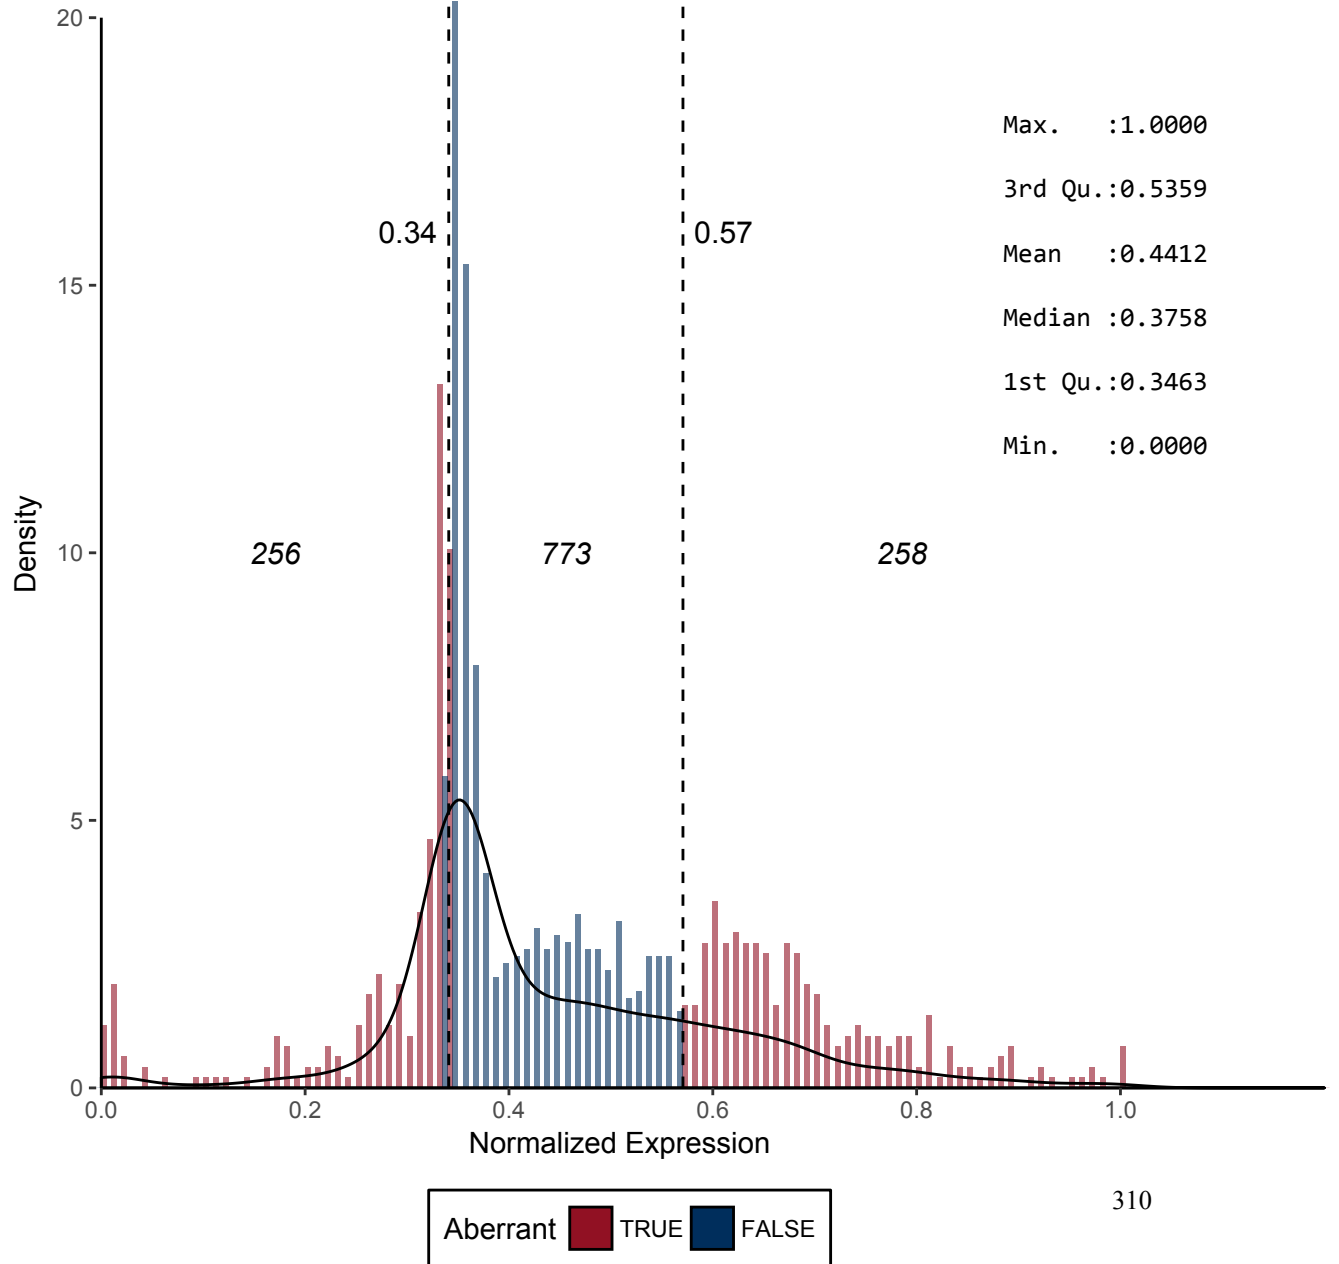

Figure 294 - CD297\*

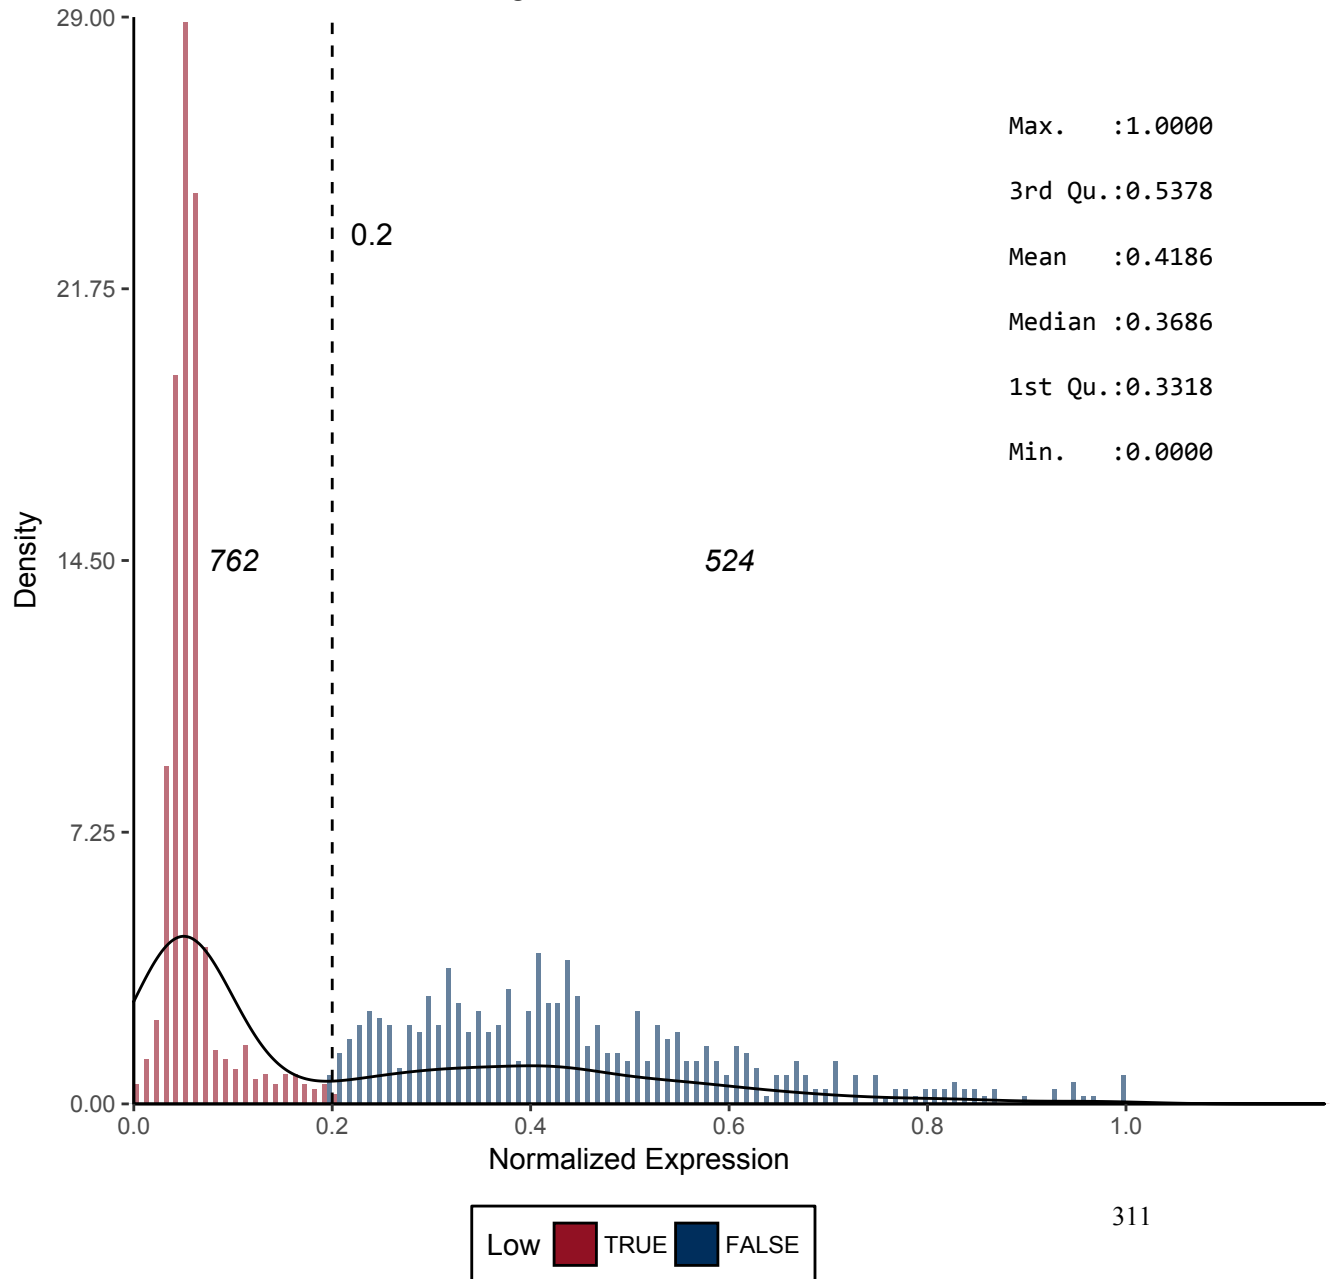

Figure 295 - CD298

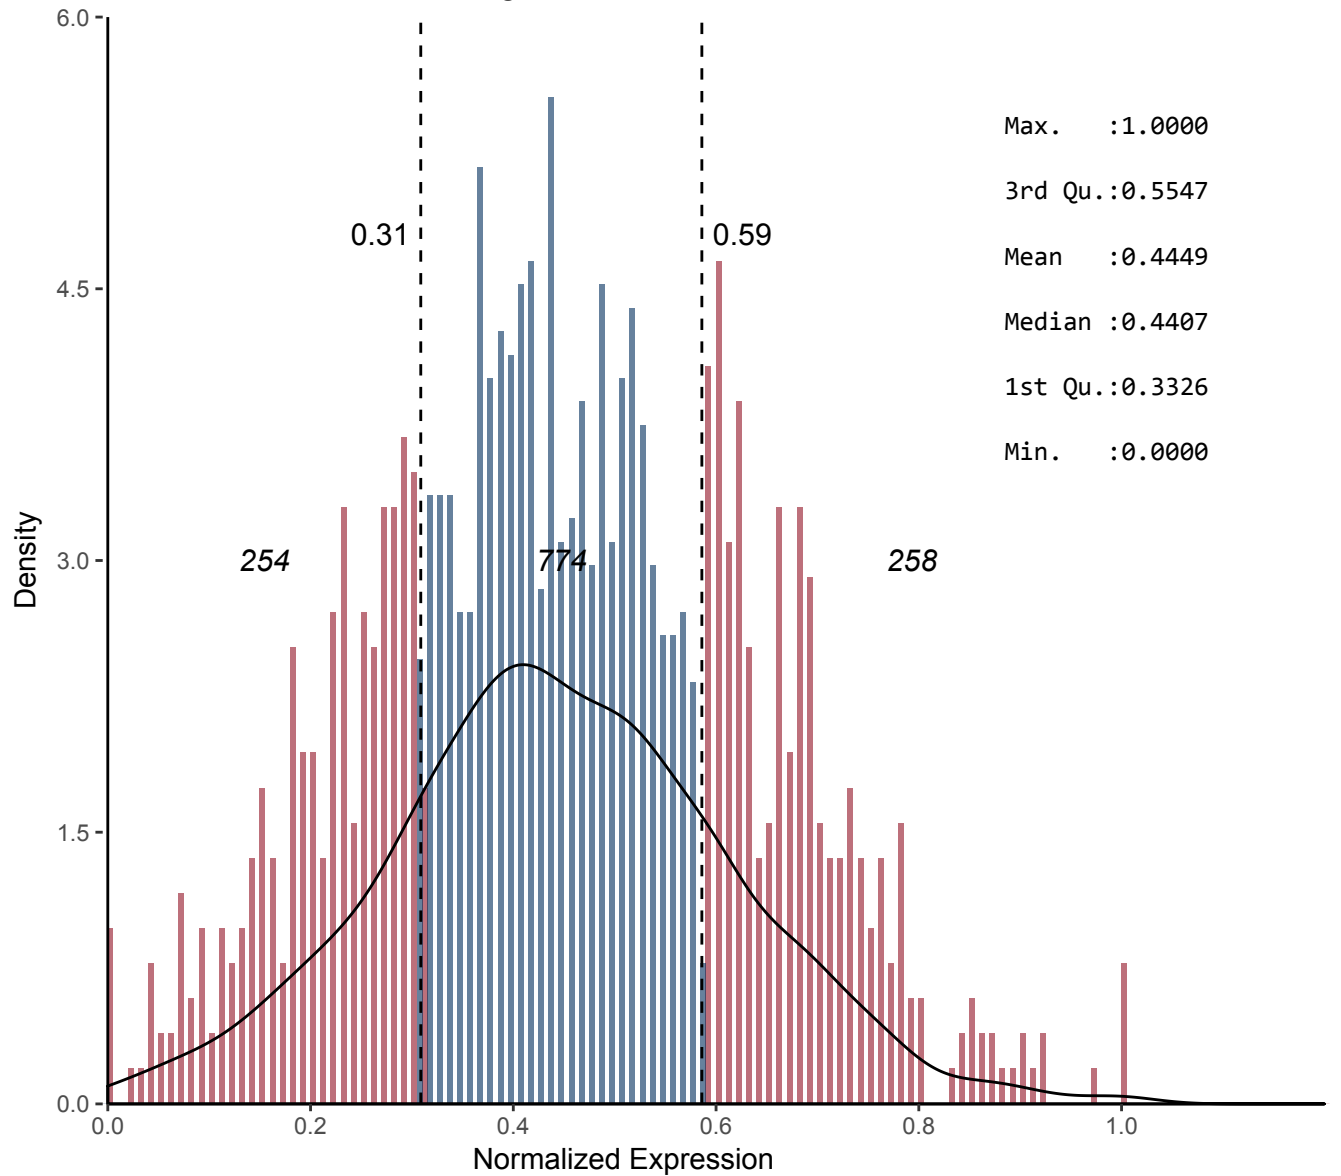

Aberrant TRUE FALSE



Figure 296 - CD299\*

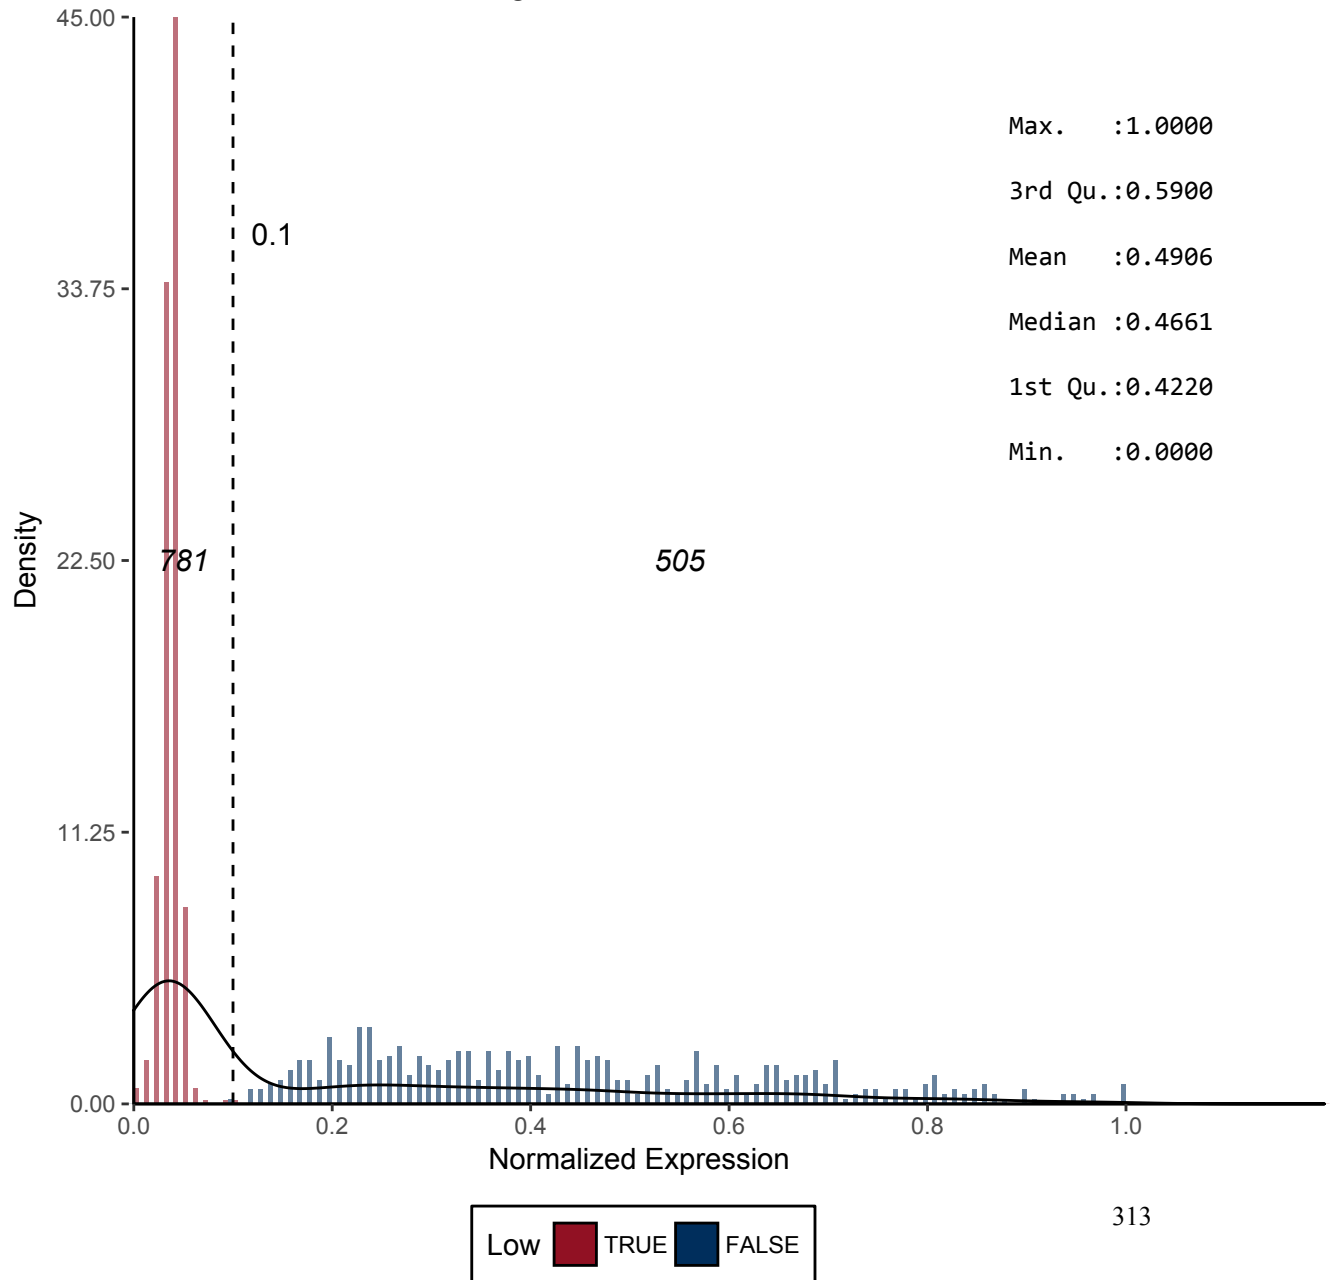

Figure 297 - CD300A

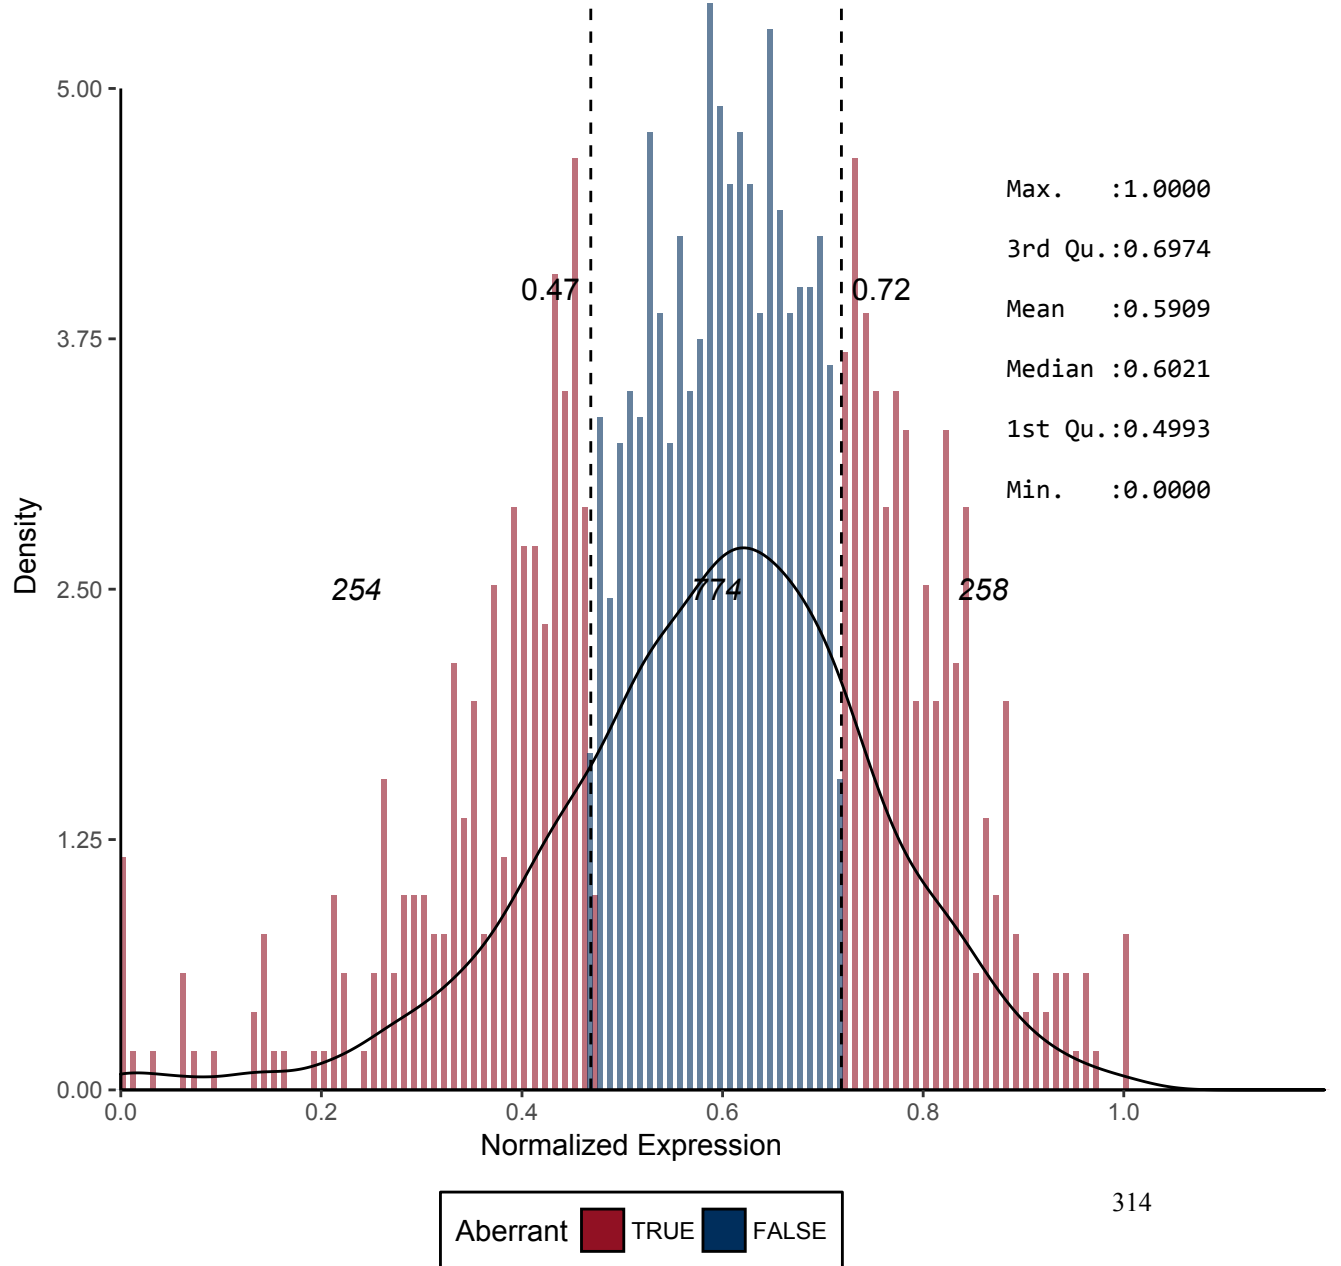

Figure 298 - CD300C

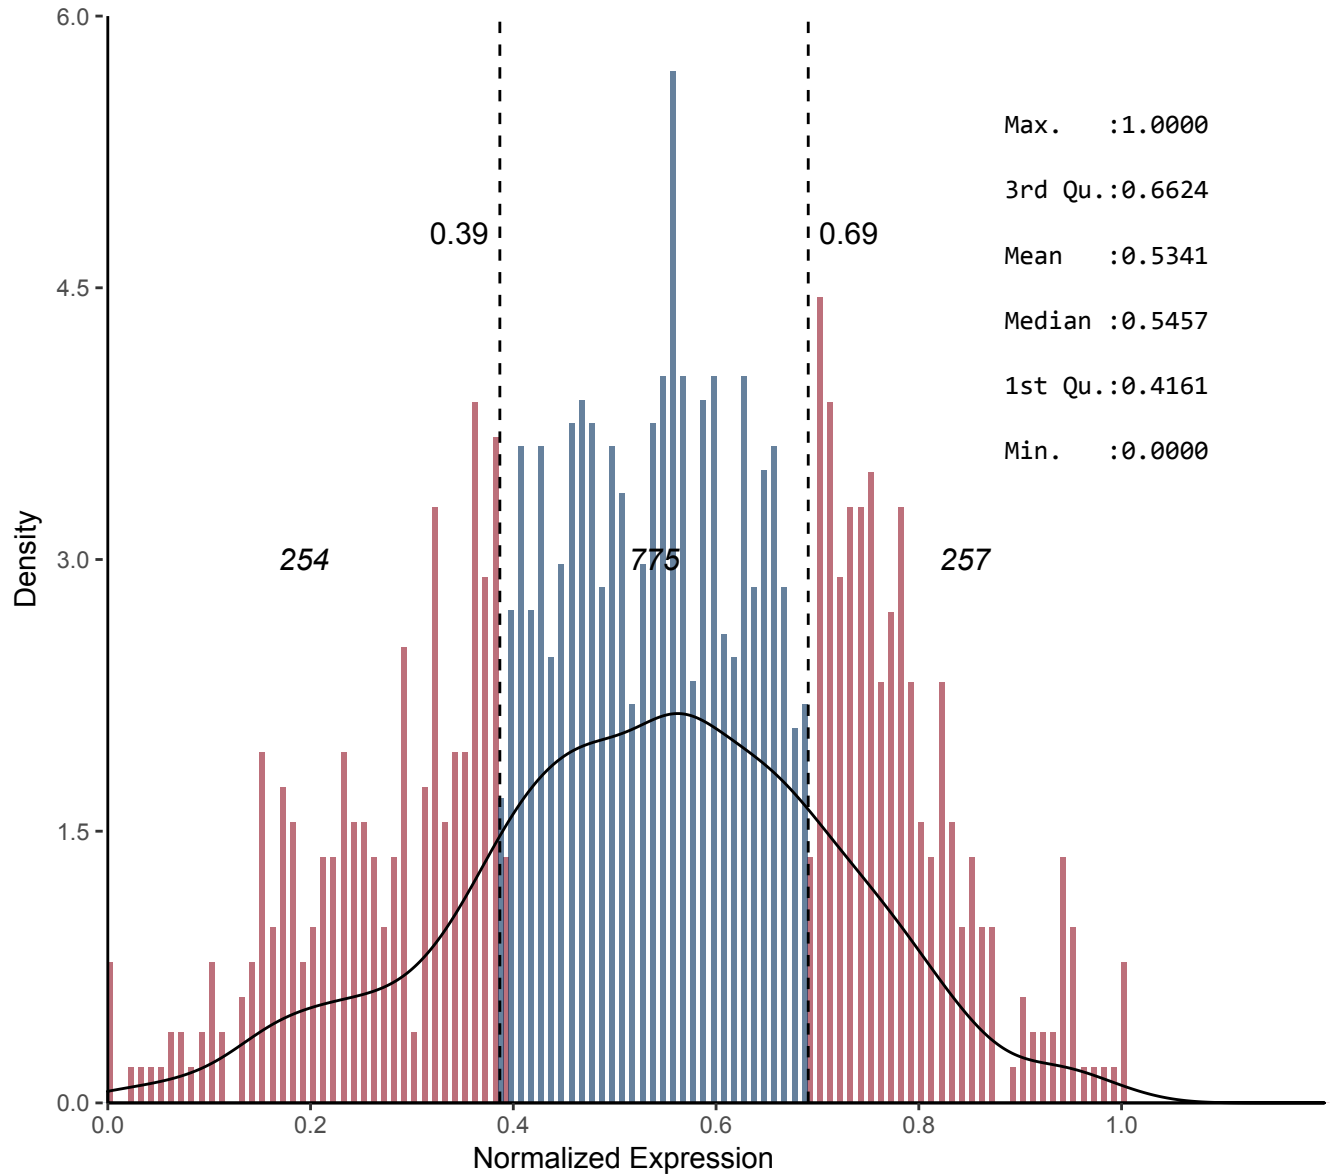

Aberrant TRUE FALSE

Figure 299 - CD301

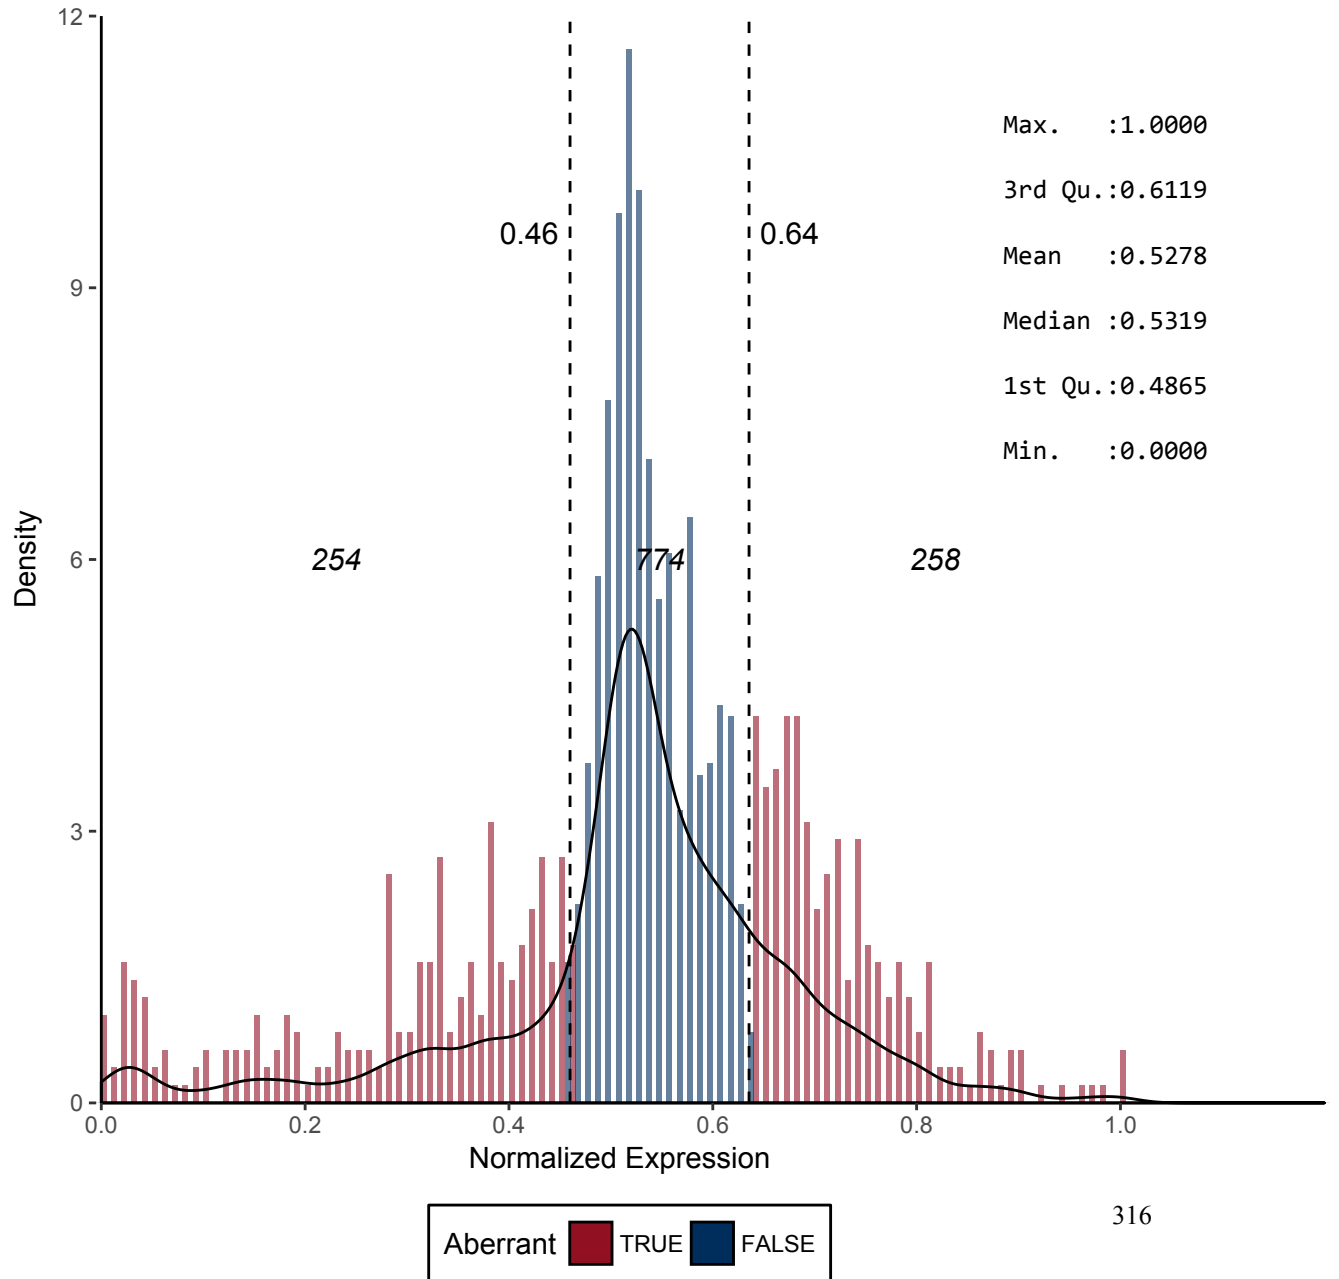

Figure 300 - CD304\*

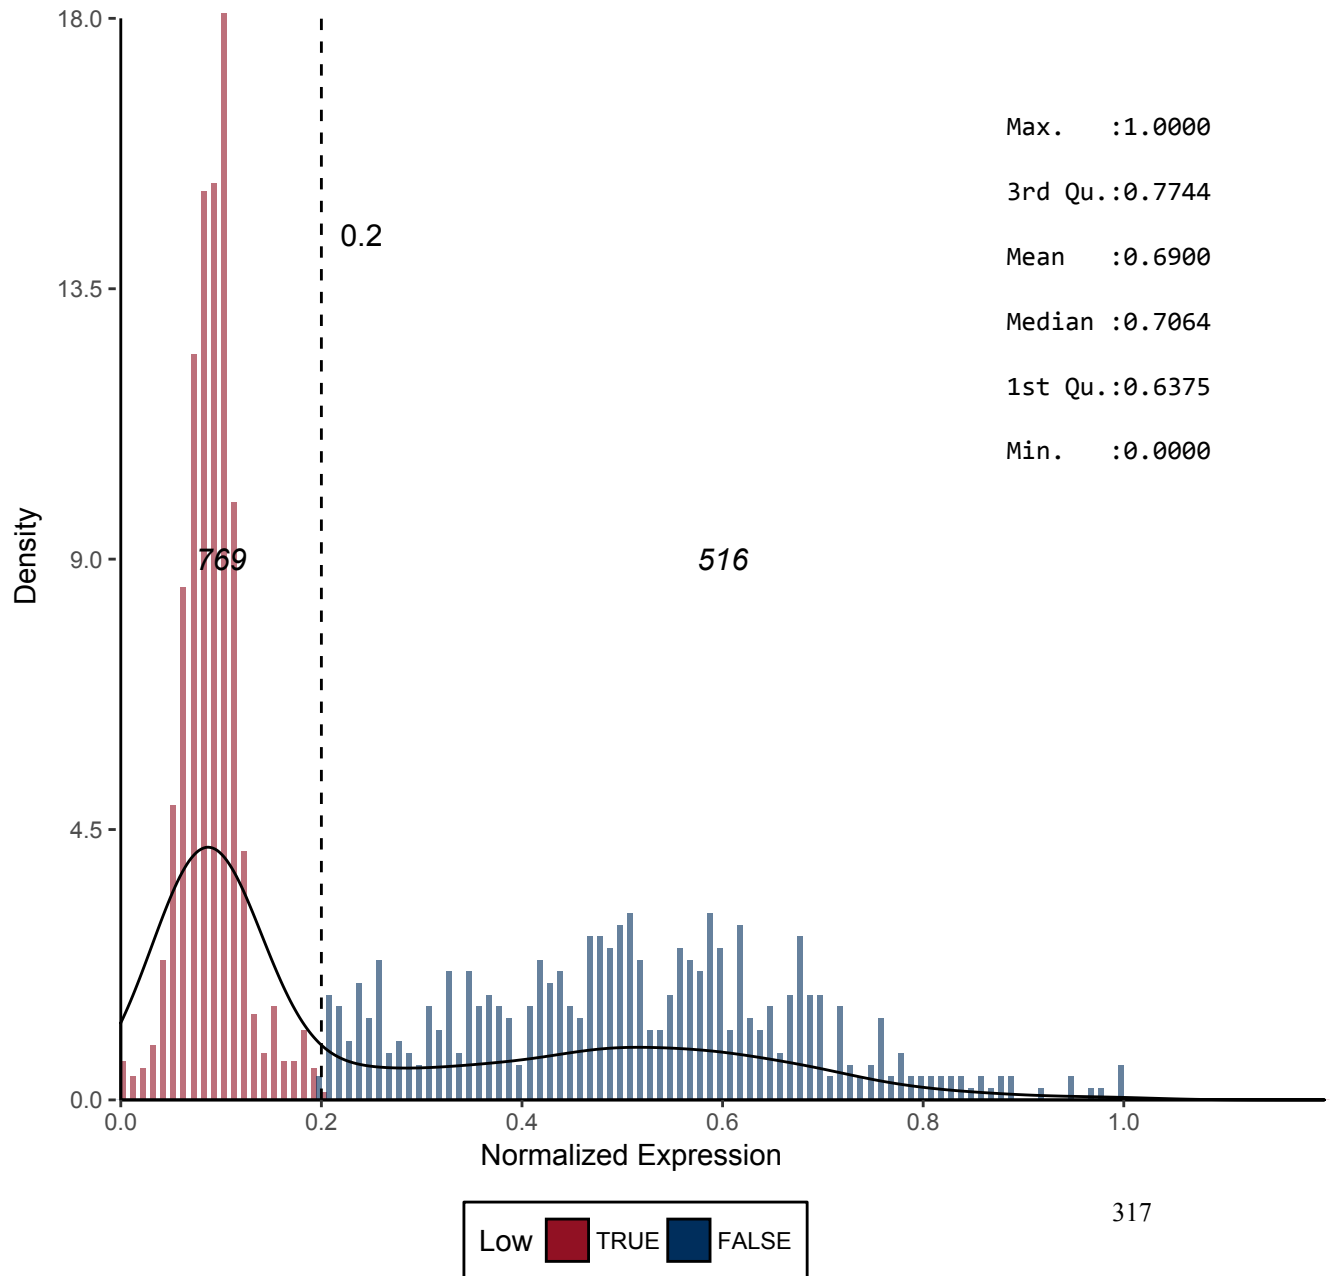

Figure 301 - CD305

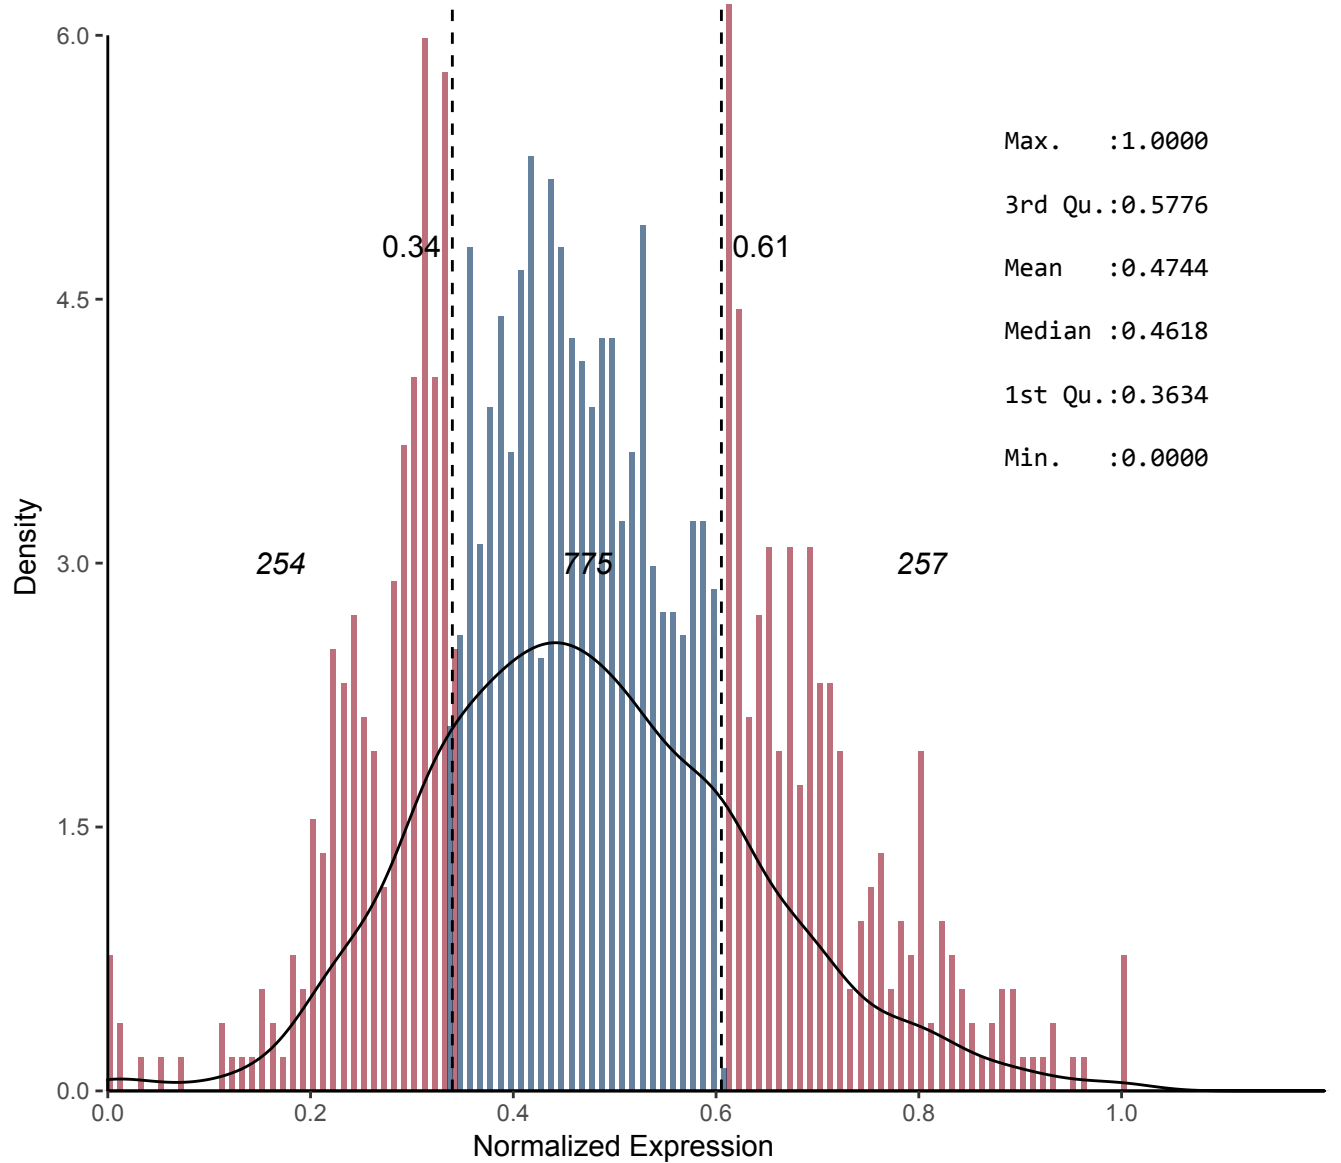

Aberrant TRUE FALSE

Figure 302 - CD306

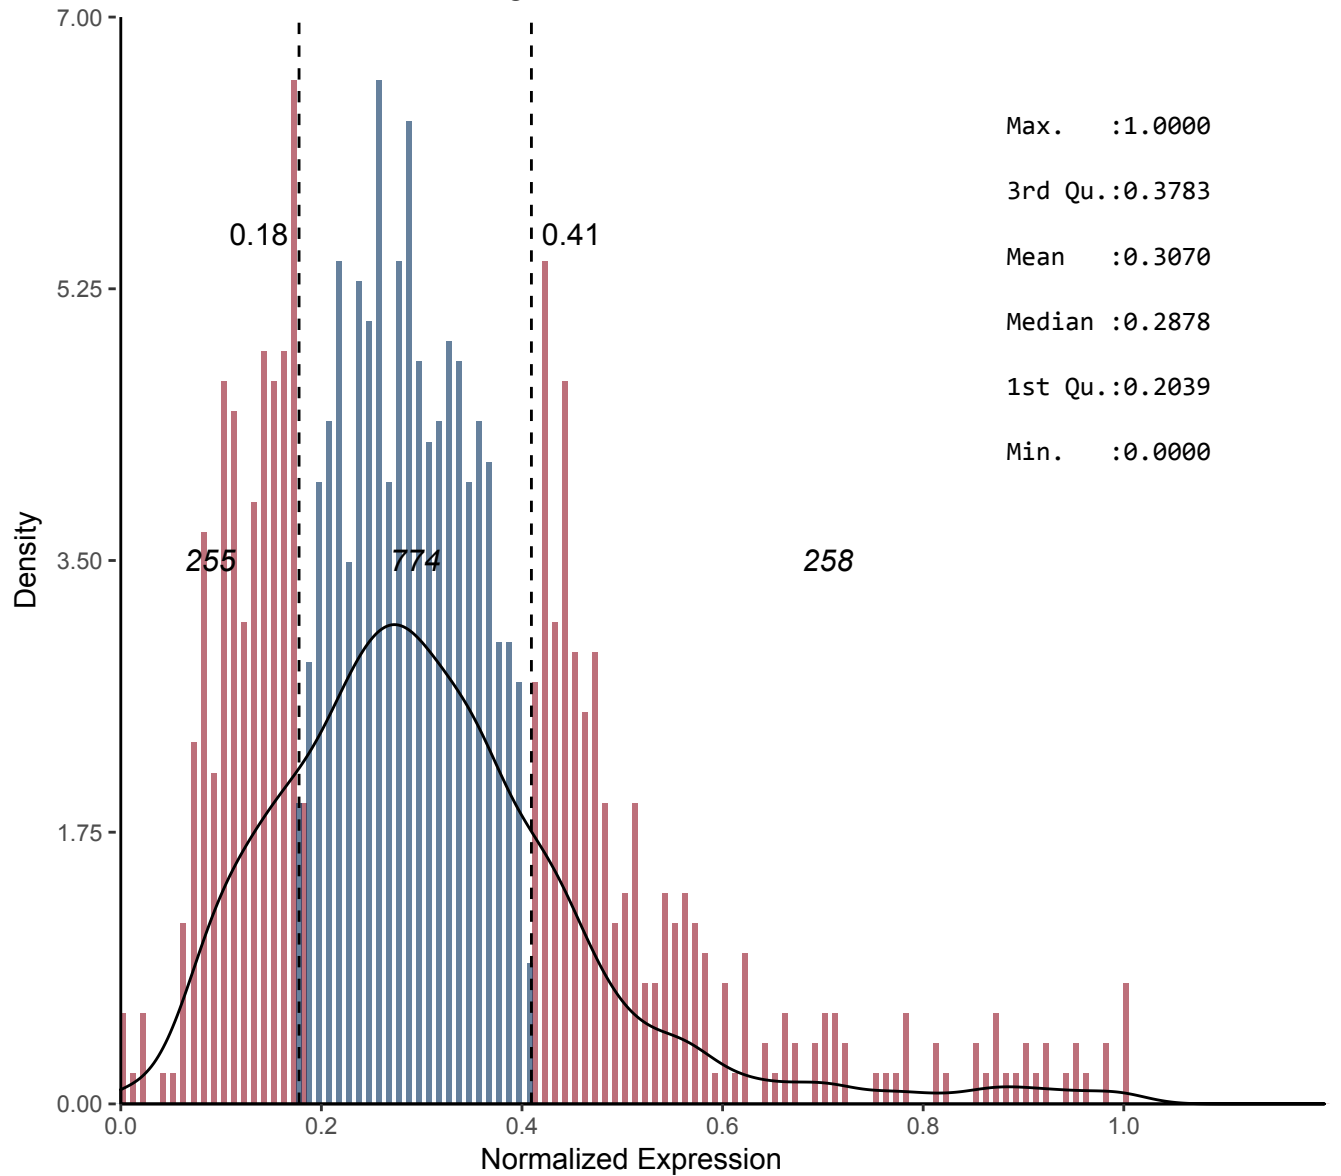

Aberrant TRUE FALSE

Figure 303 - CD307A\*

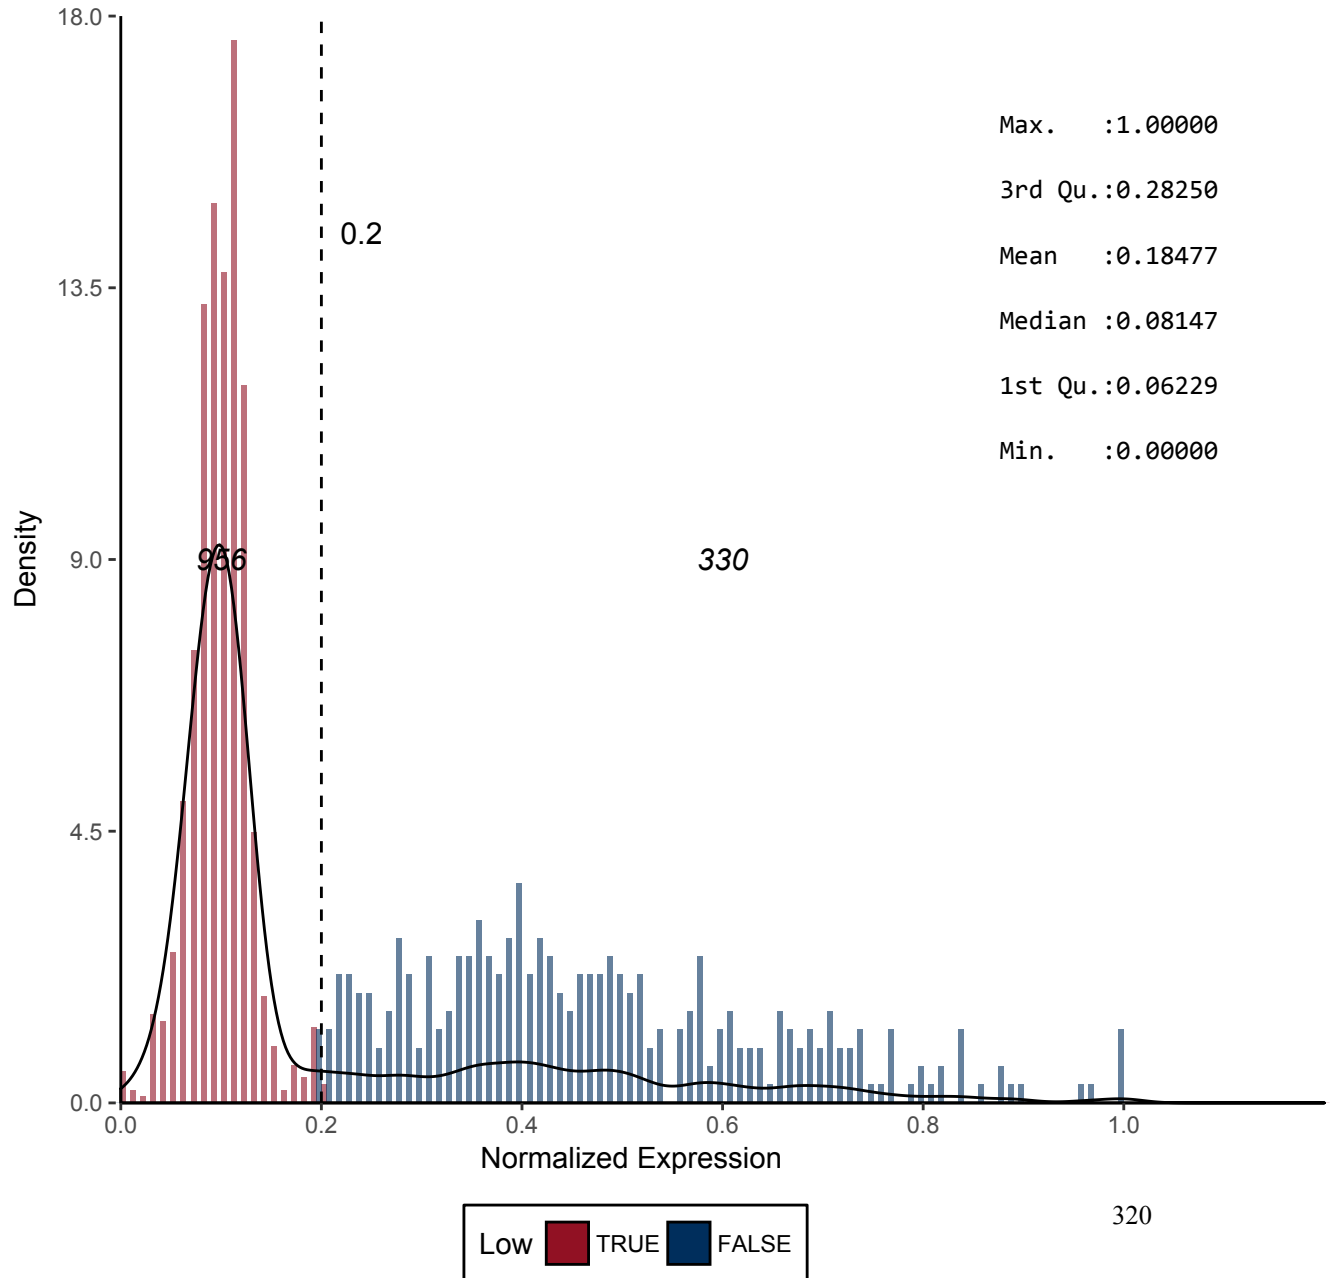



Figure 304 - CD307B

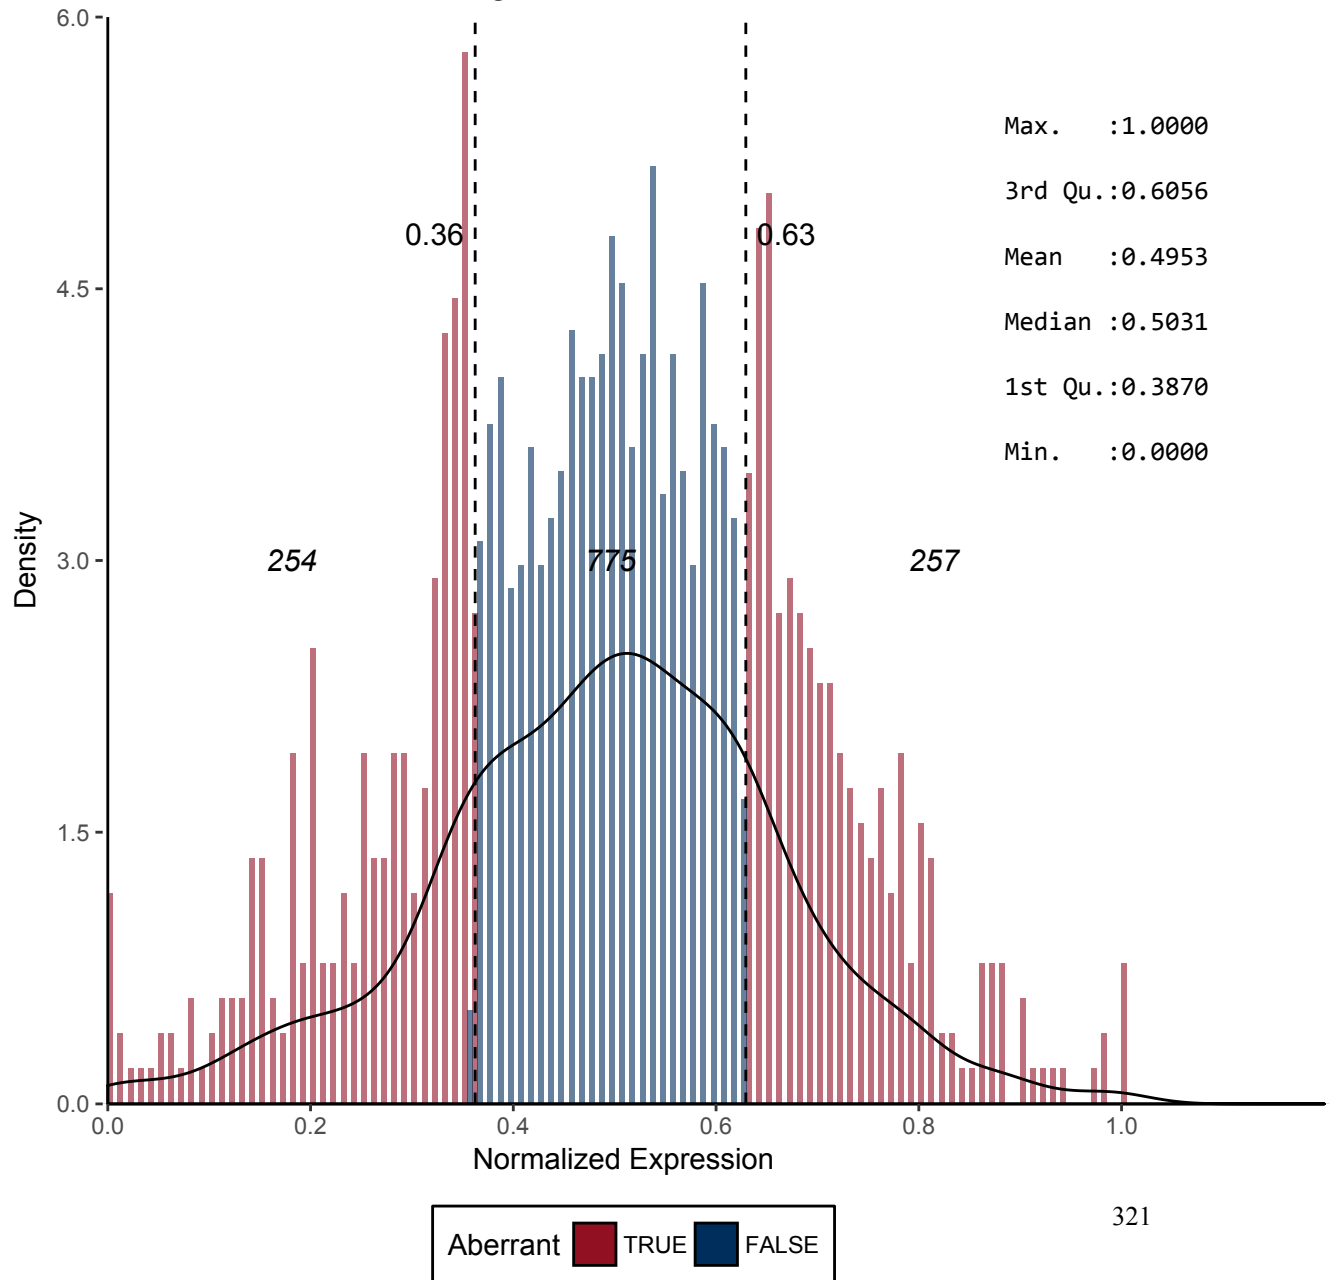

Figure 305 - CD307C

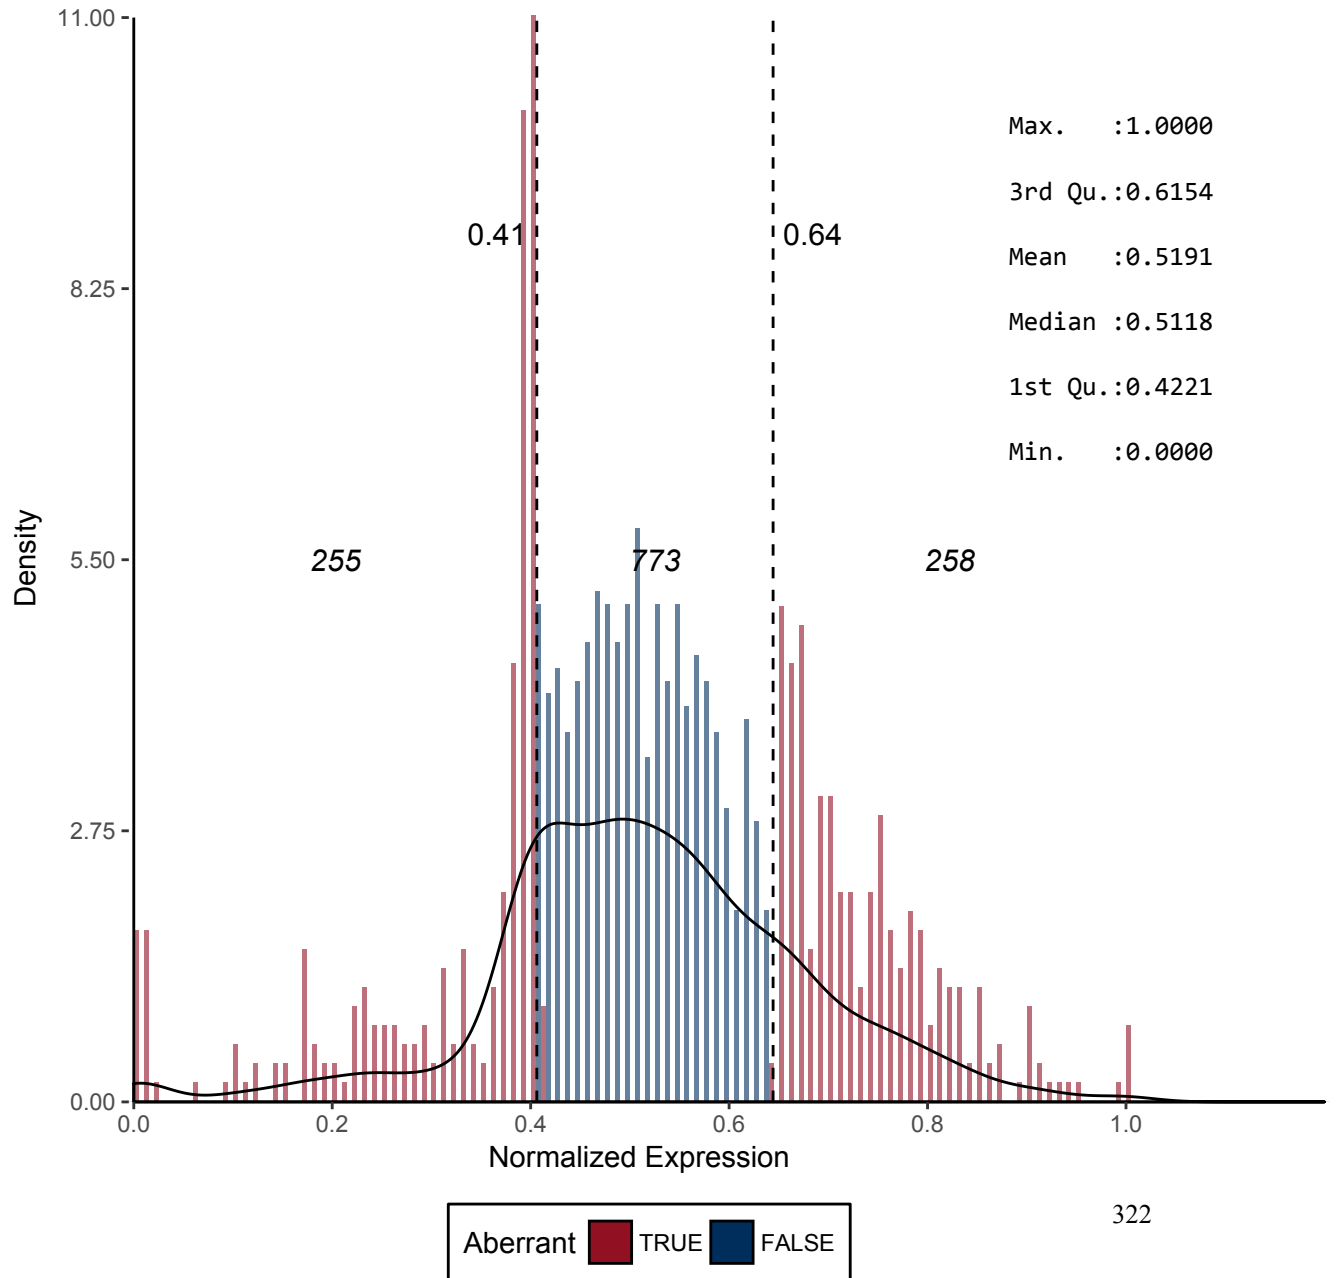

Figure 306 - CD307D\*

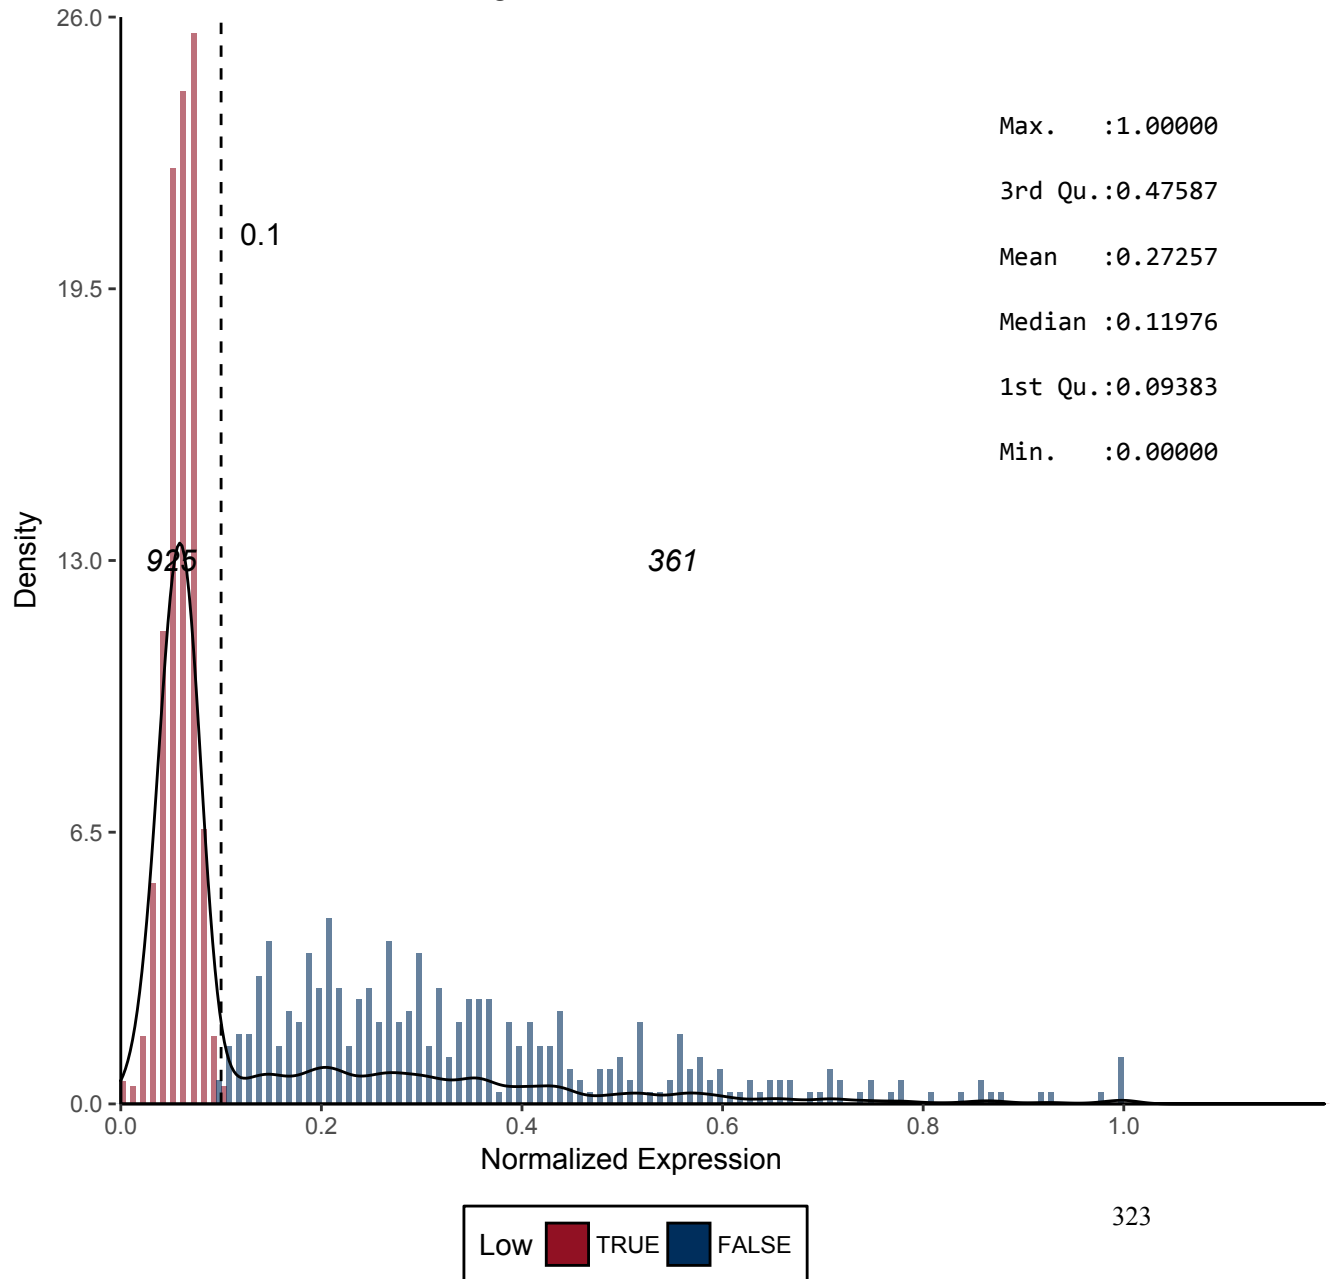

Figure 307 - CD307E

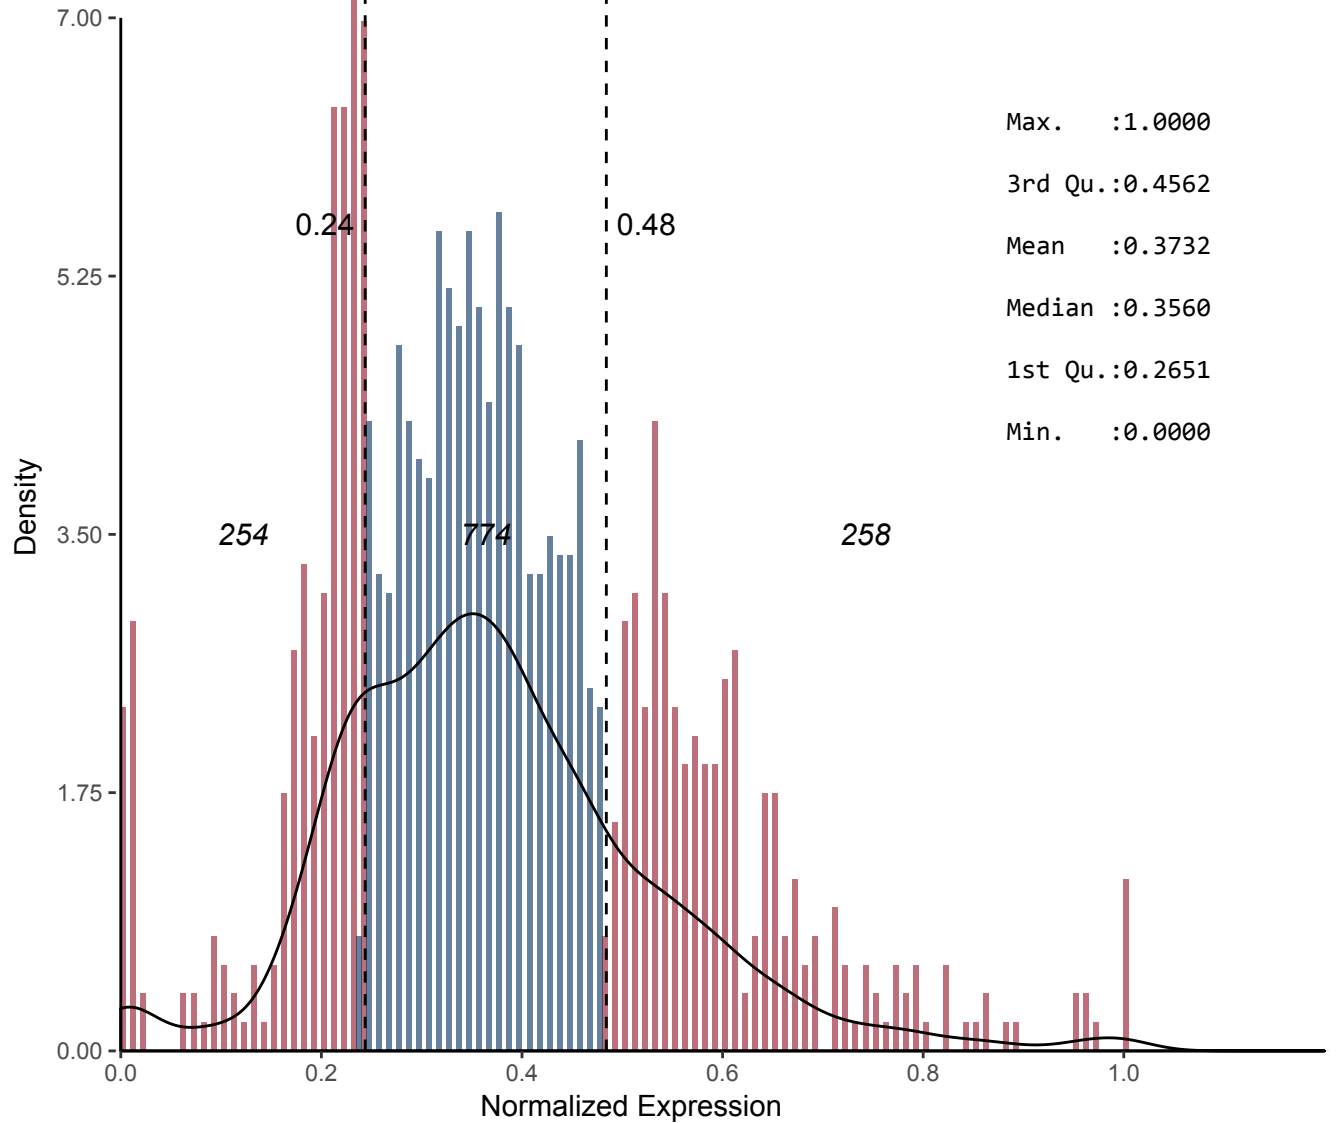

Aberrant TRUE FALSE

Figure 308 - CD308

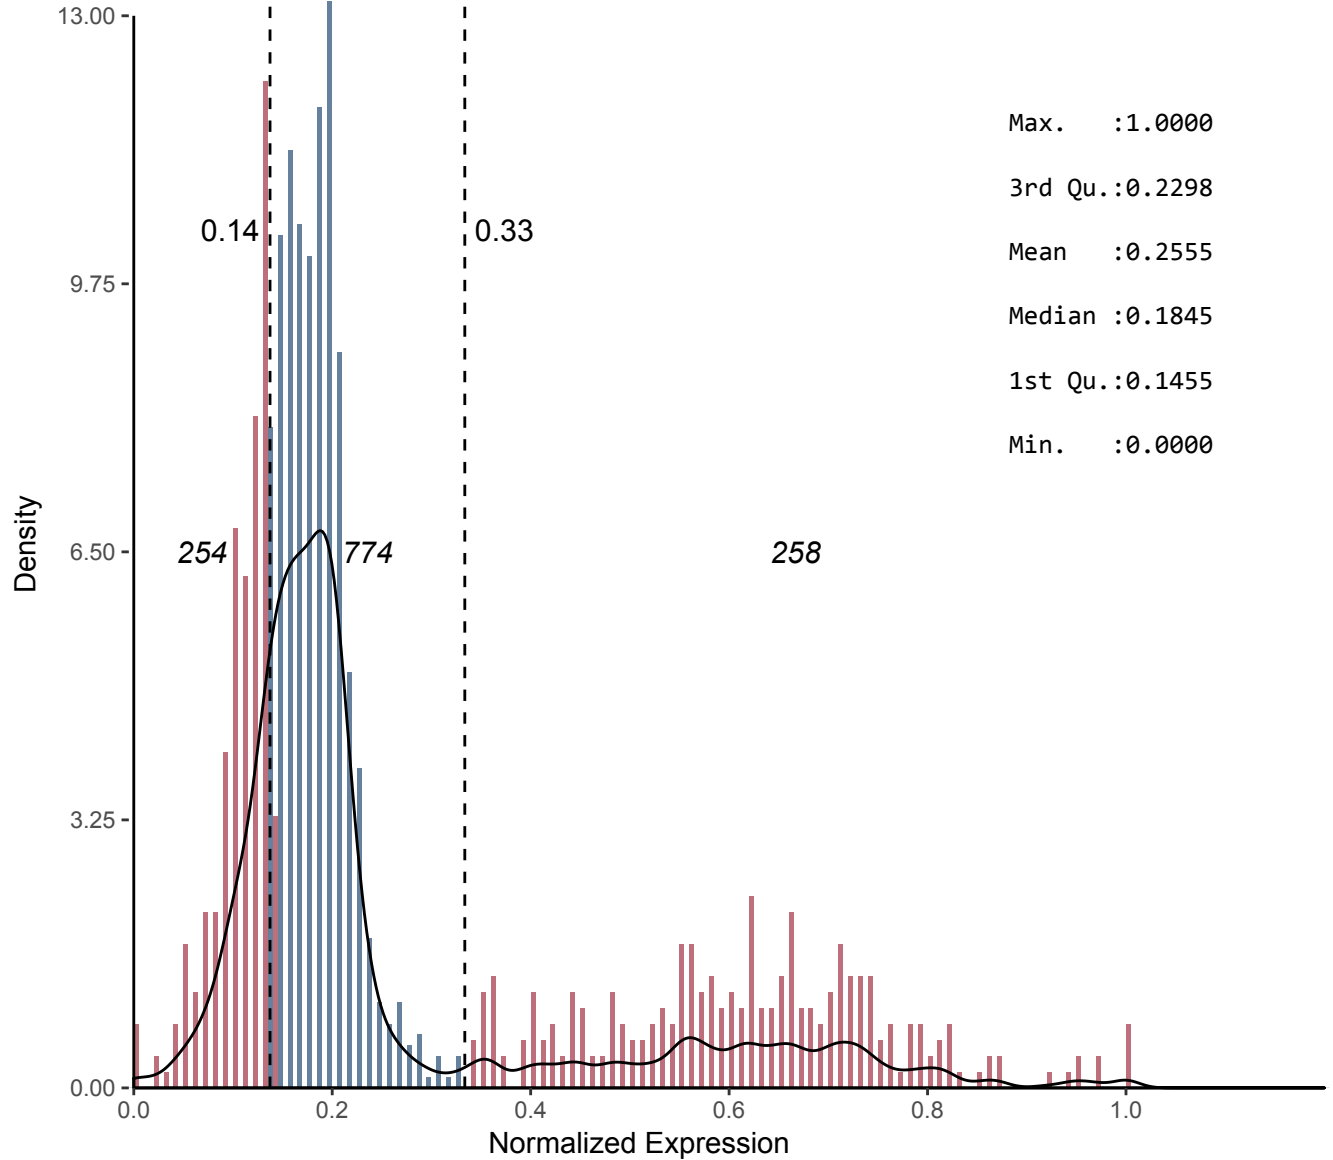

Aberrant ■ TRUE ■ FALSE

Figure 309 - CD309\*

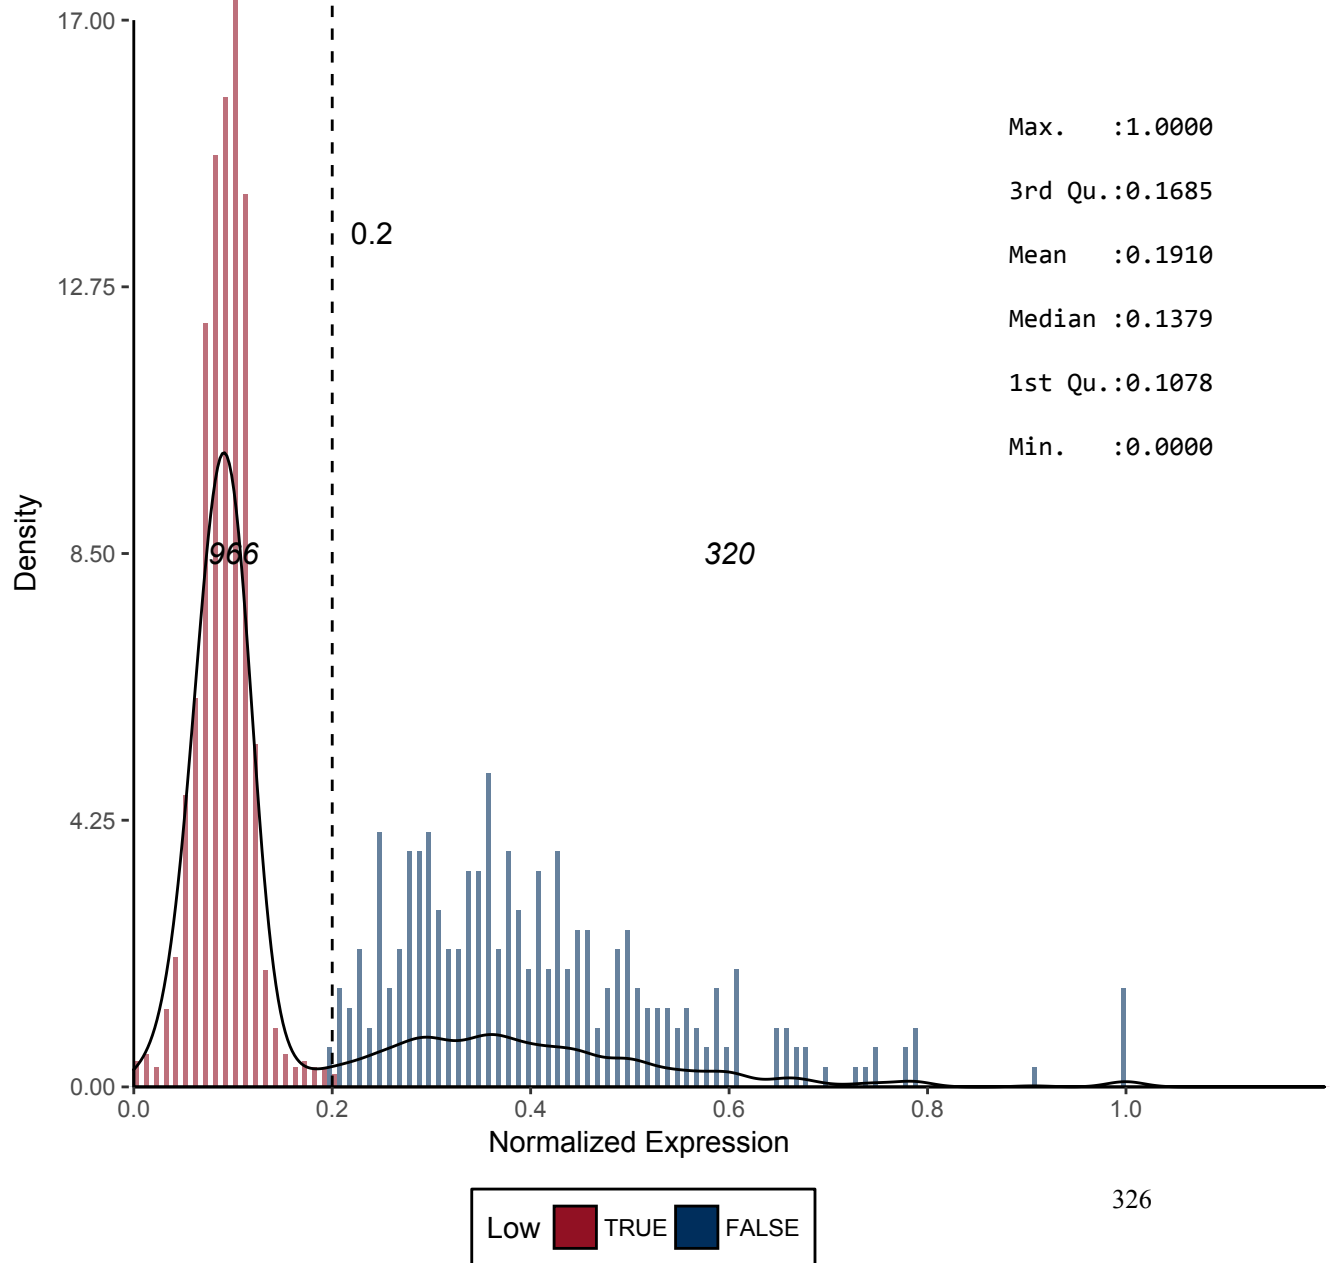

Figure 310 - CD312

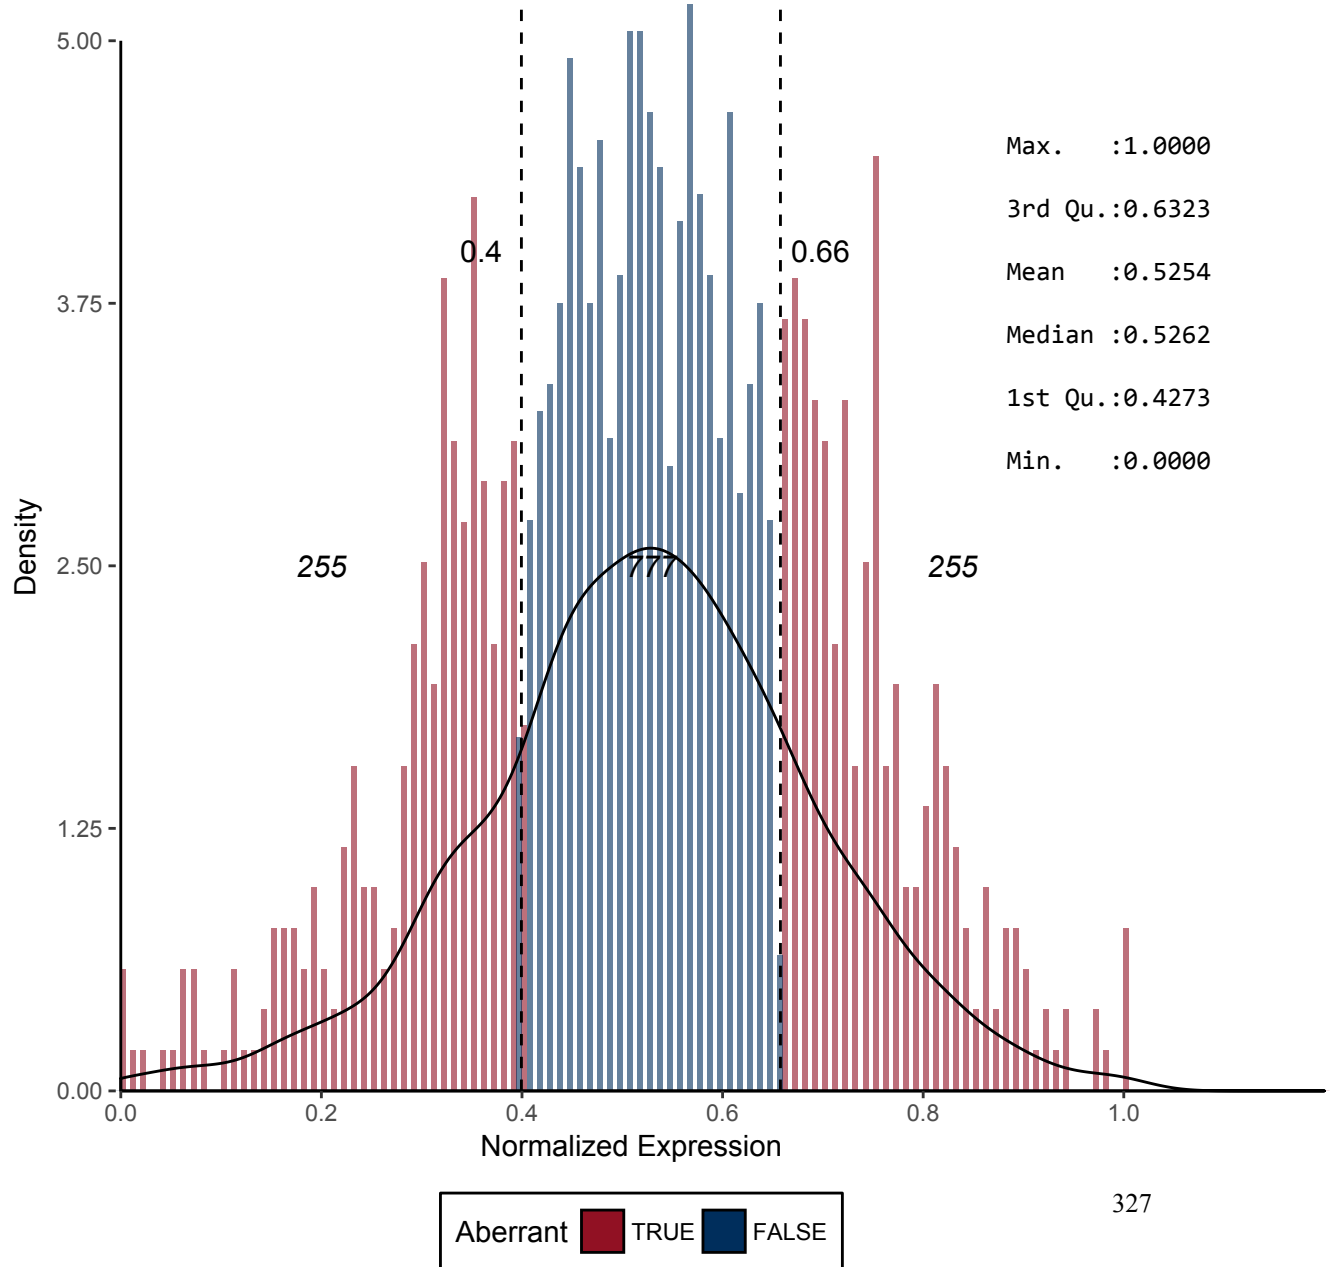

Figure 311 - CD315\*

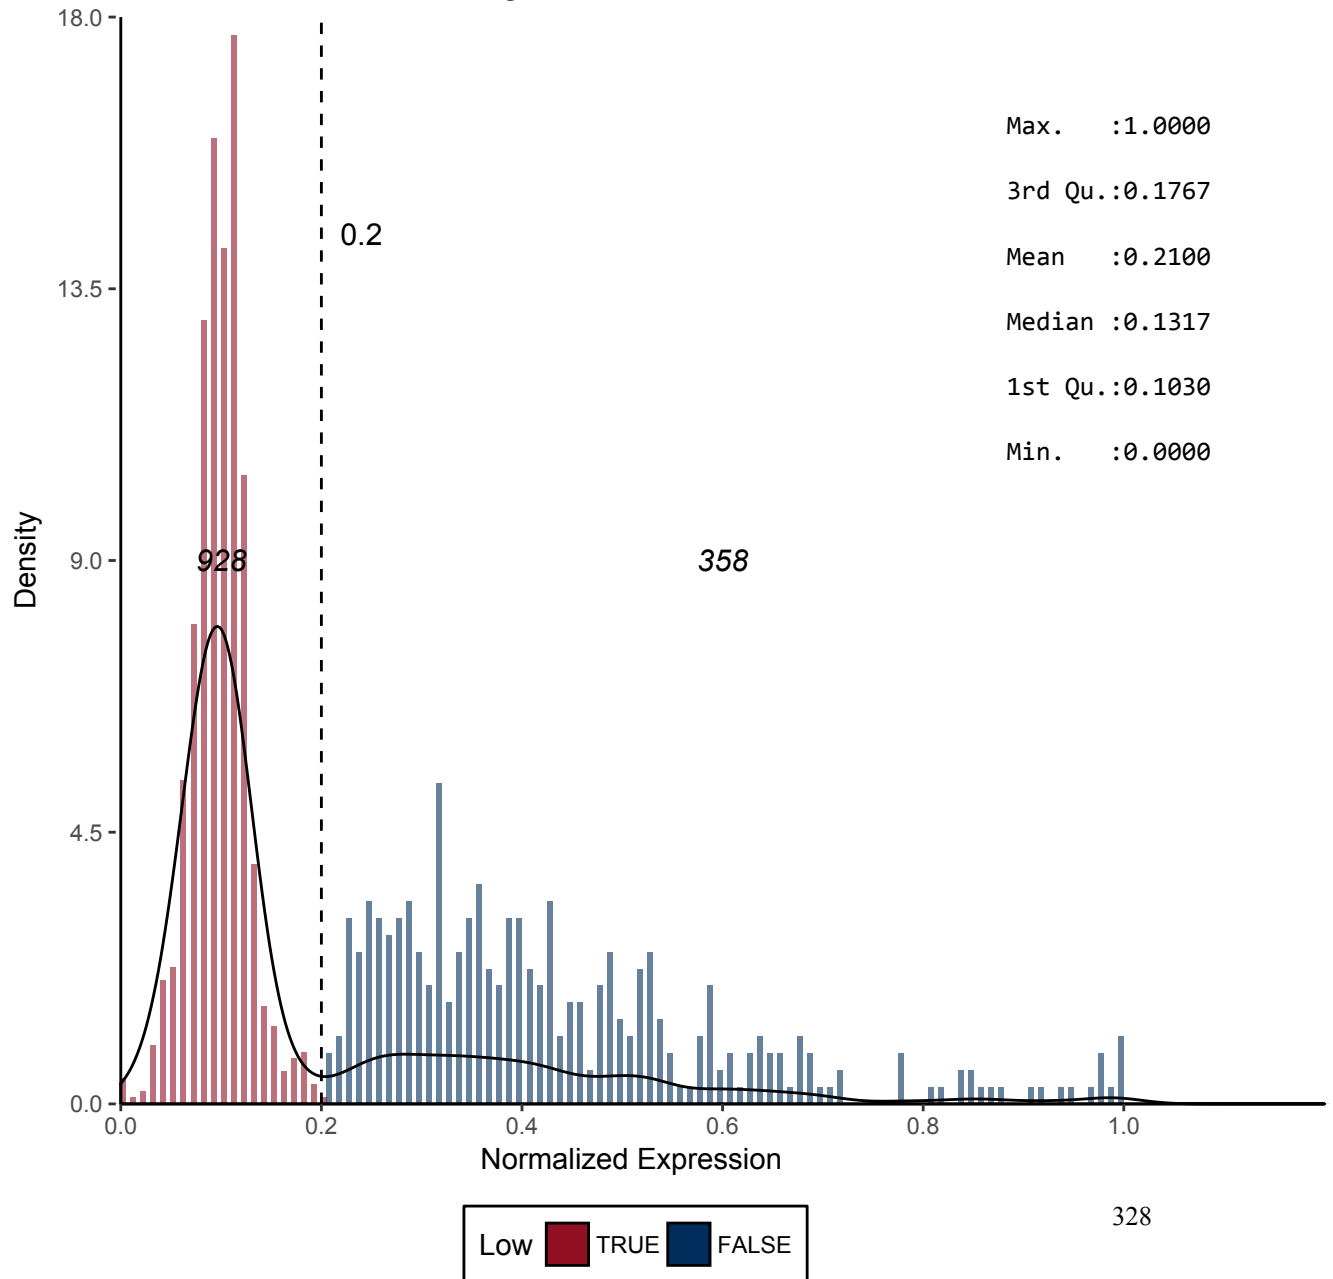



Figure 312 - CD316\*

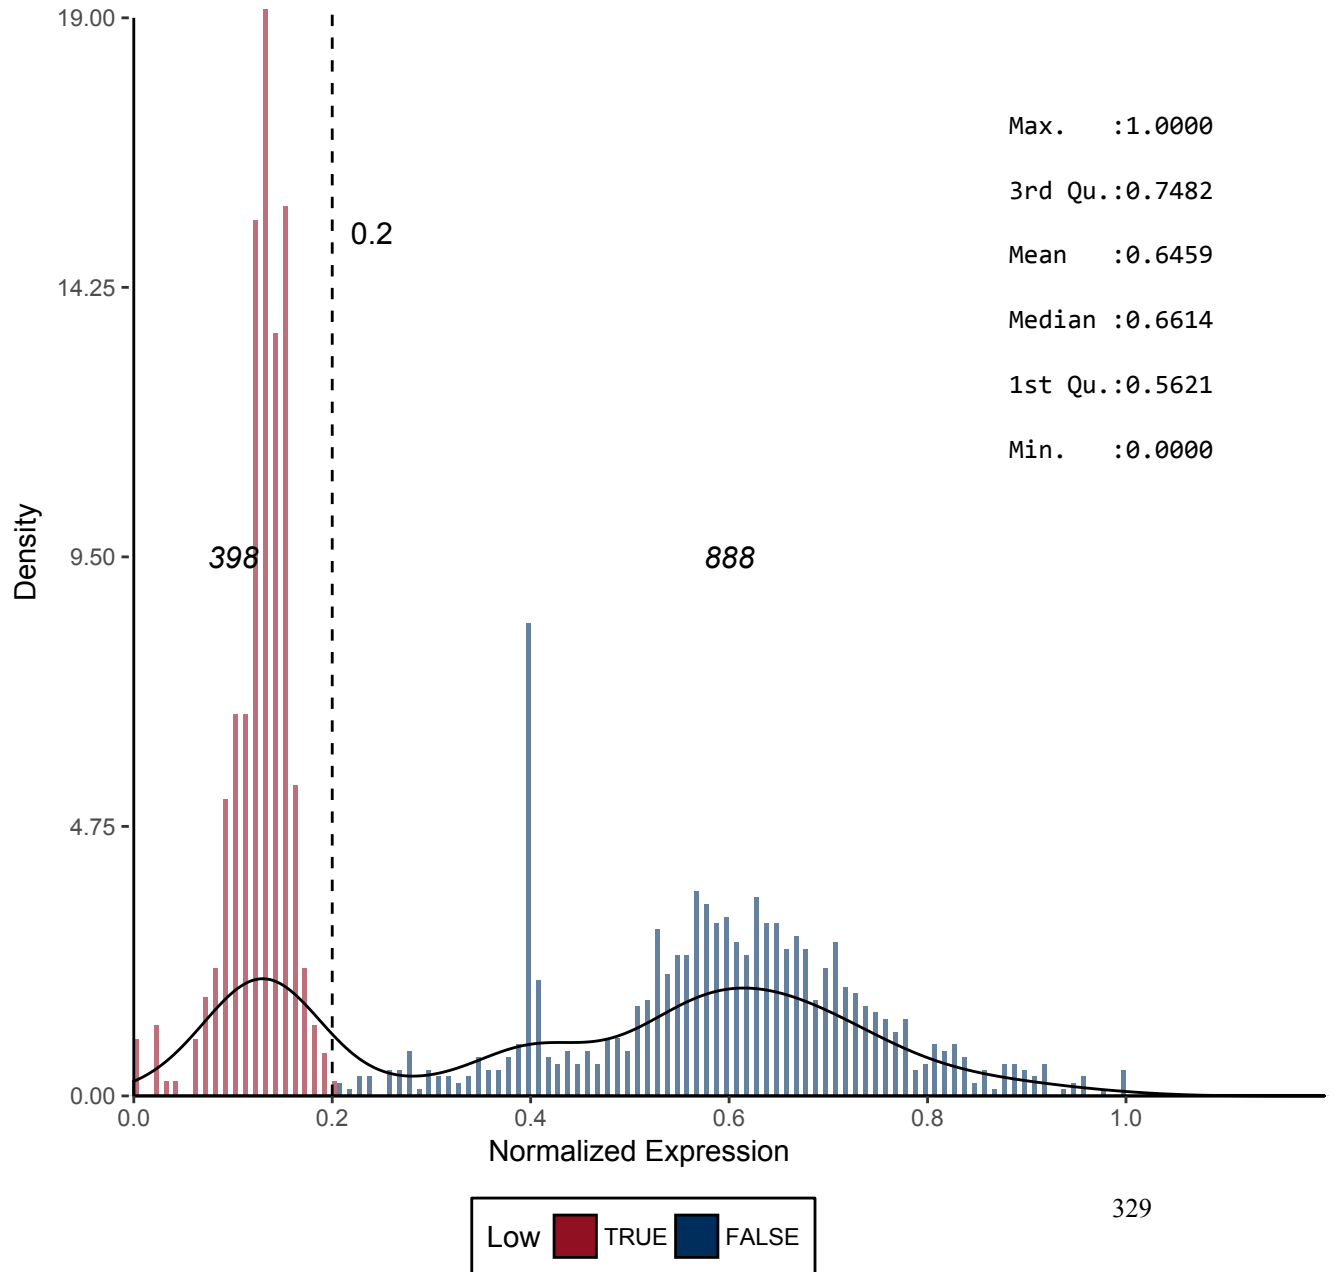

Figure 313 - CD317

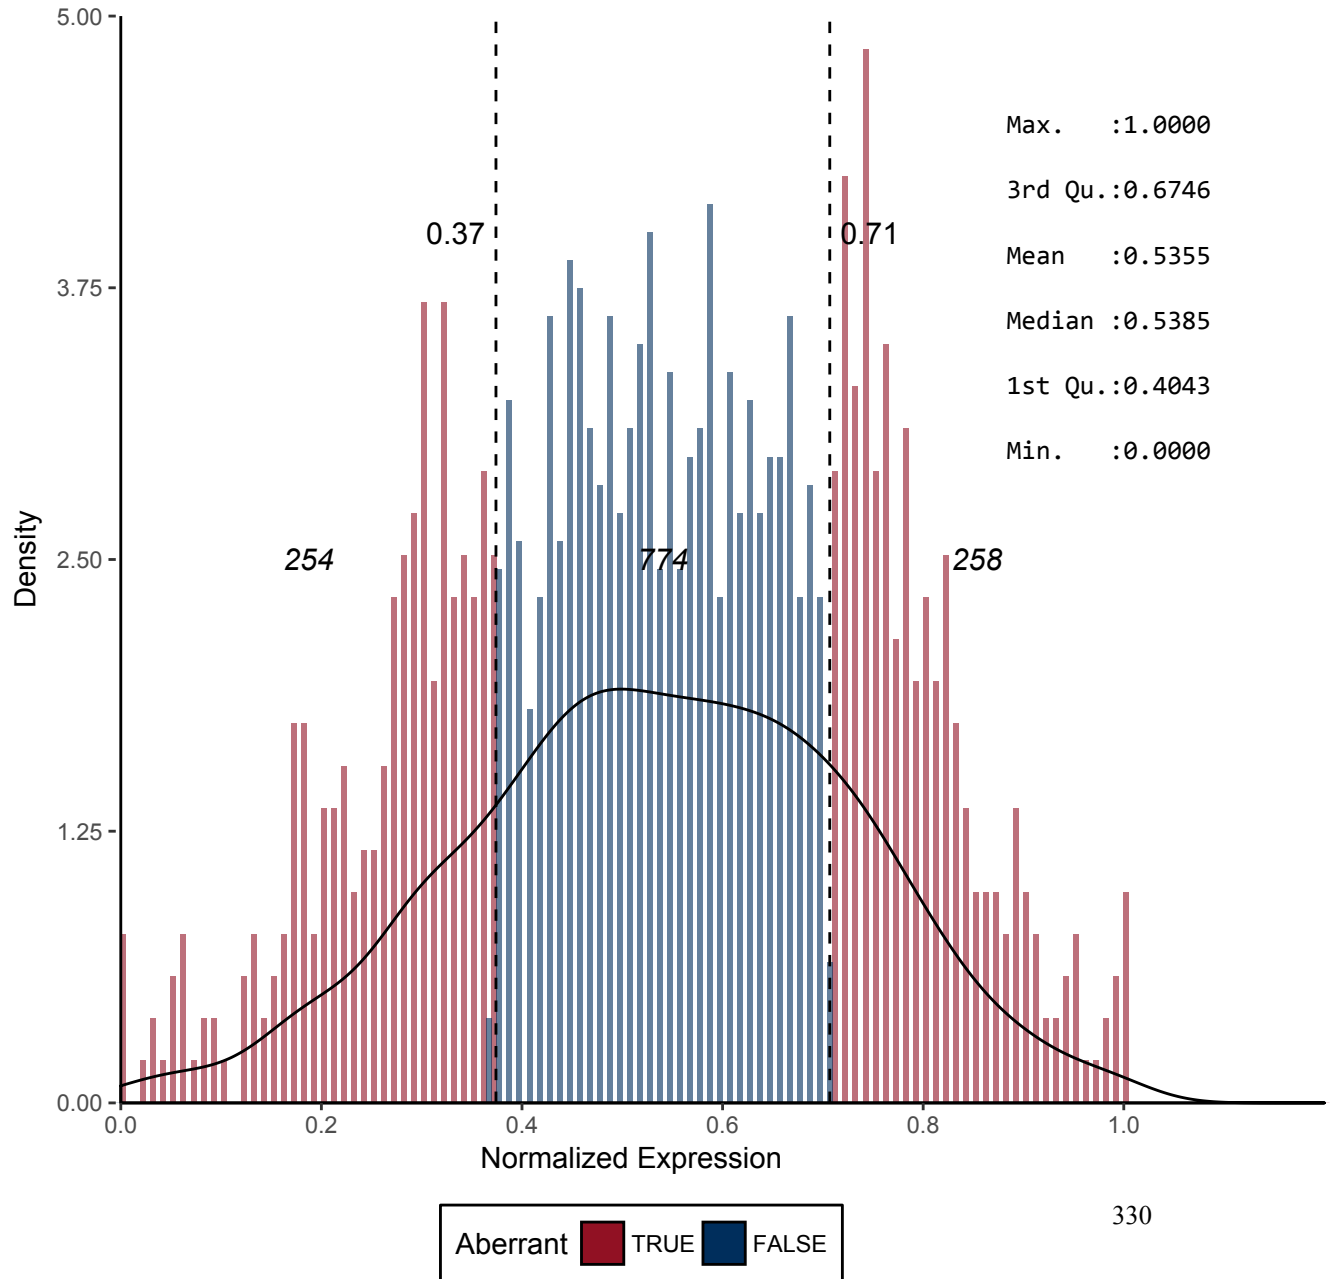

Figure 314 - CD318\*

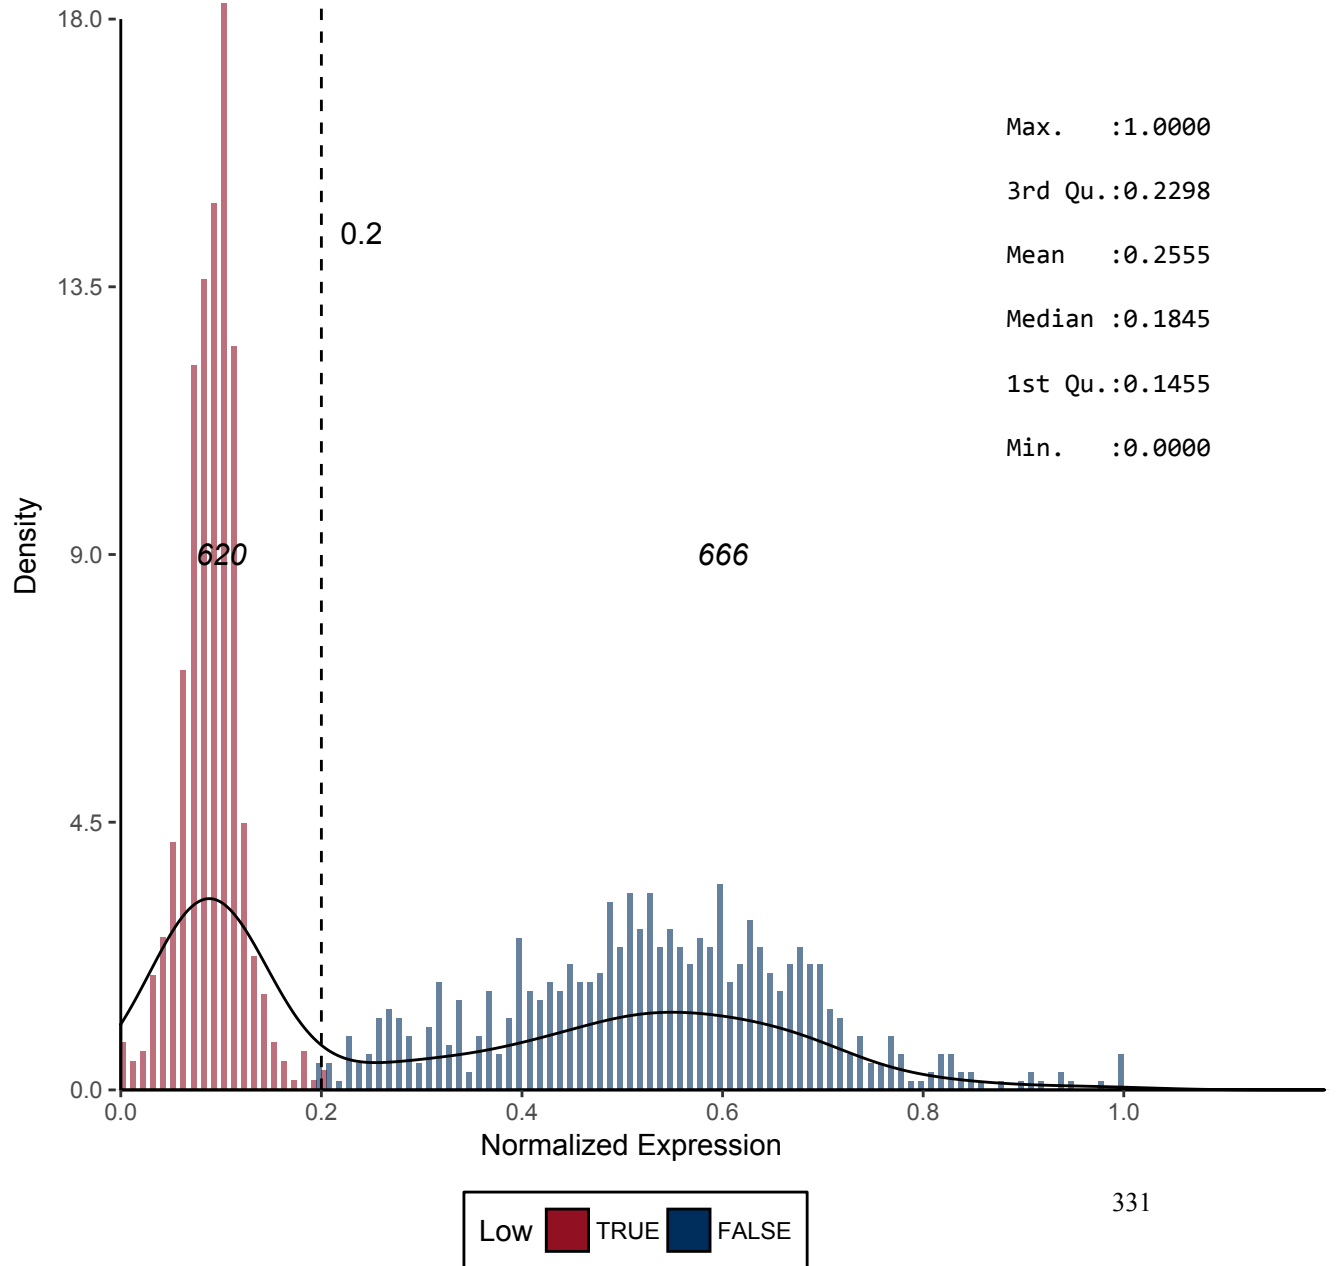

Figure 315 - CD319

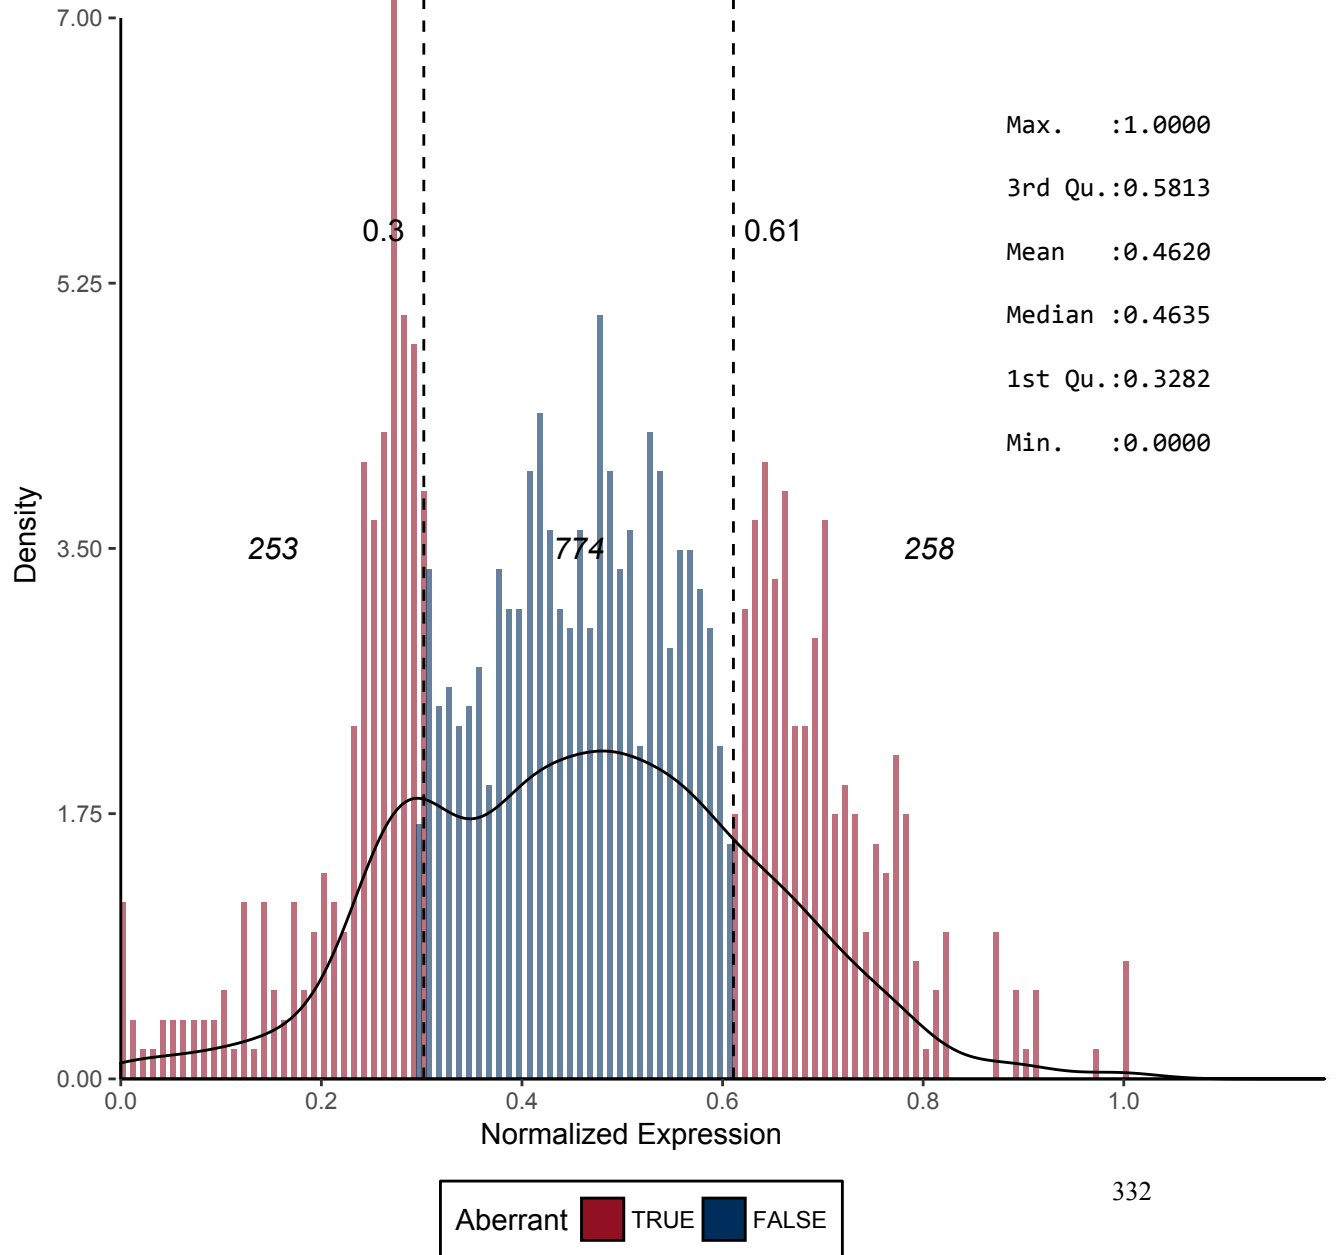

Figure 316 - CD320

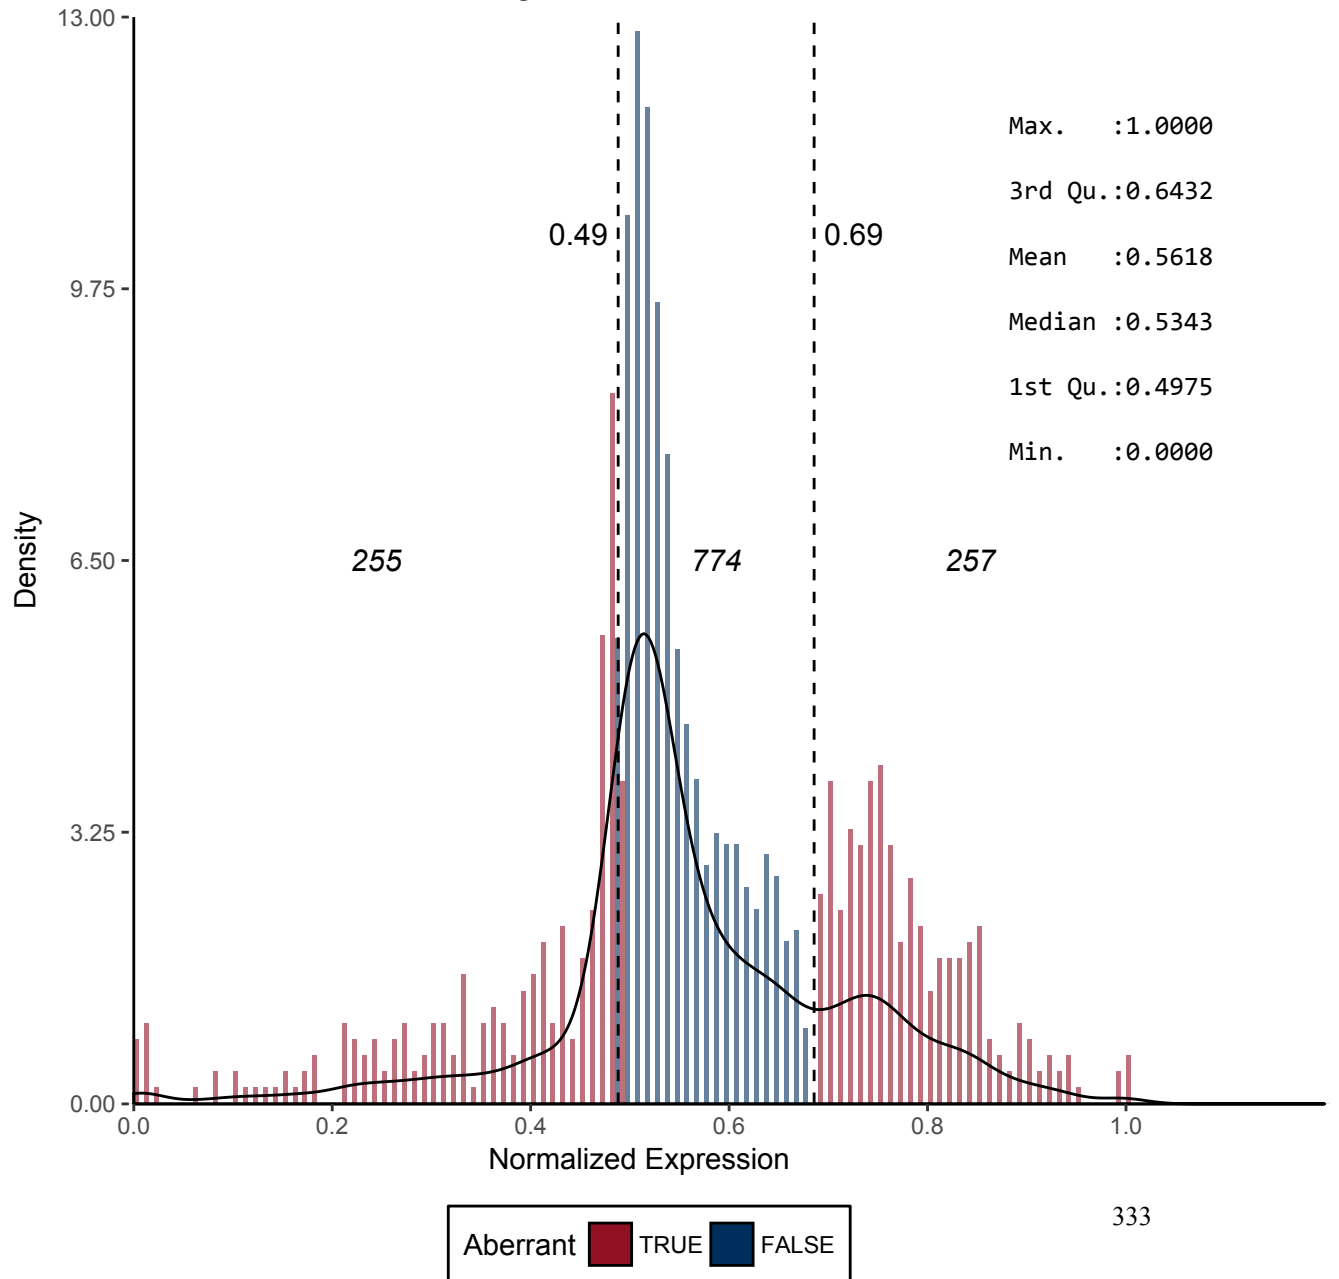

Figure 317 - CD321

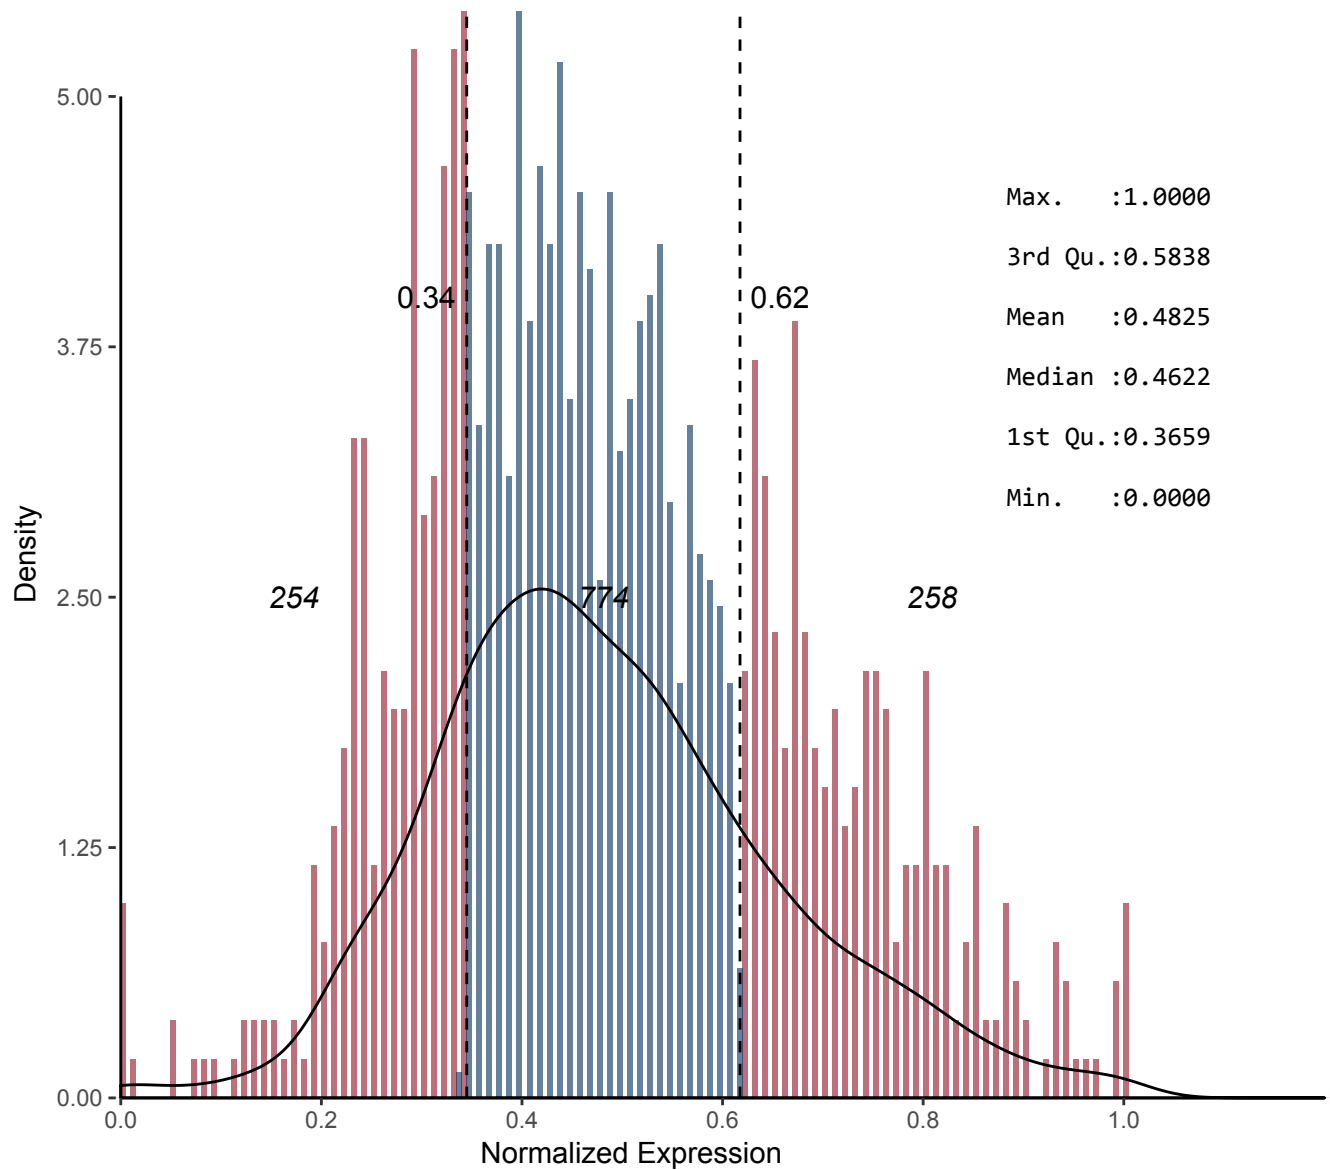

Aberrant TRUE FALSE

Figure 318 - CD322\*

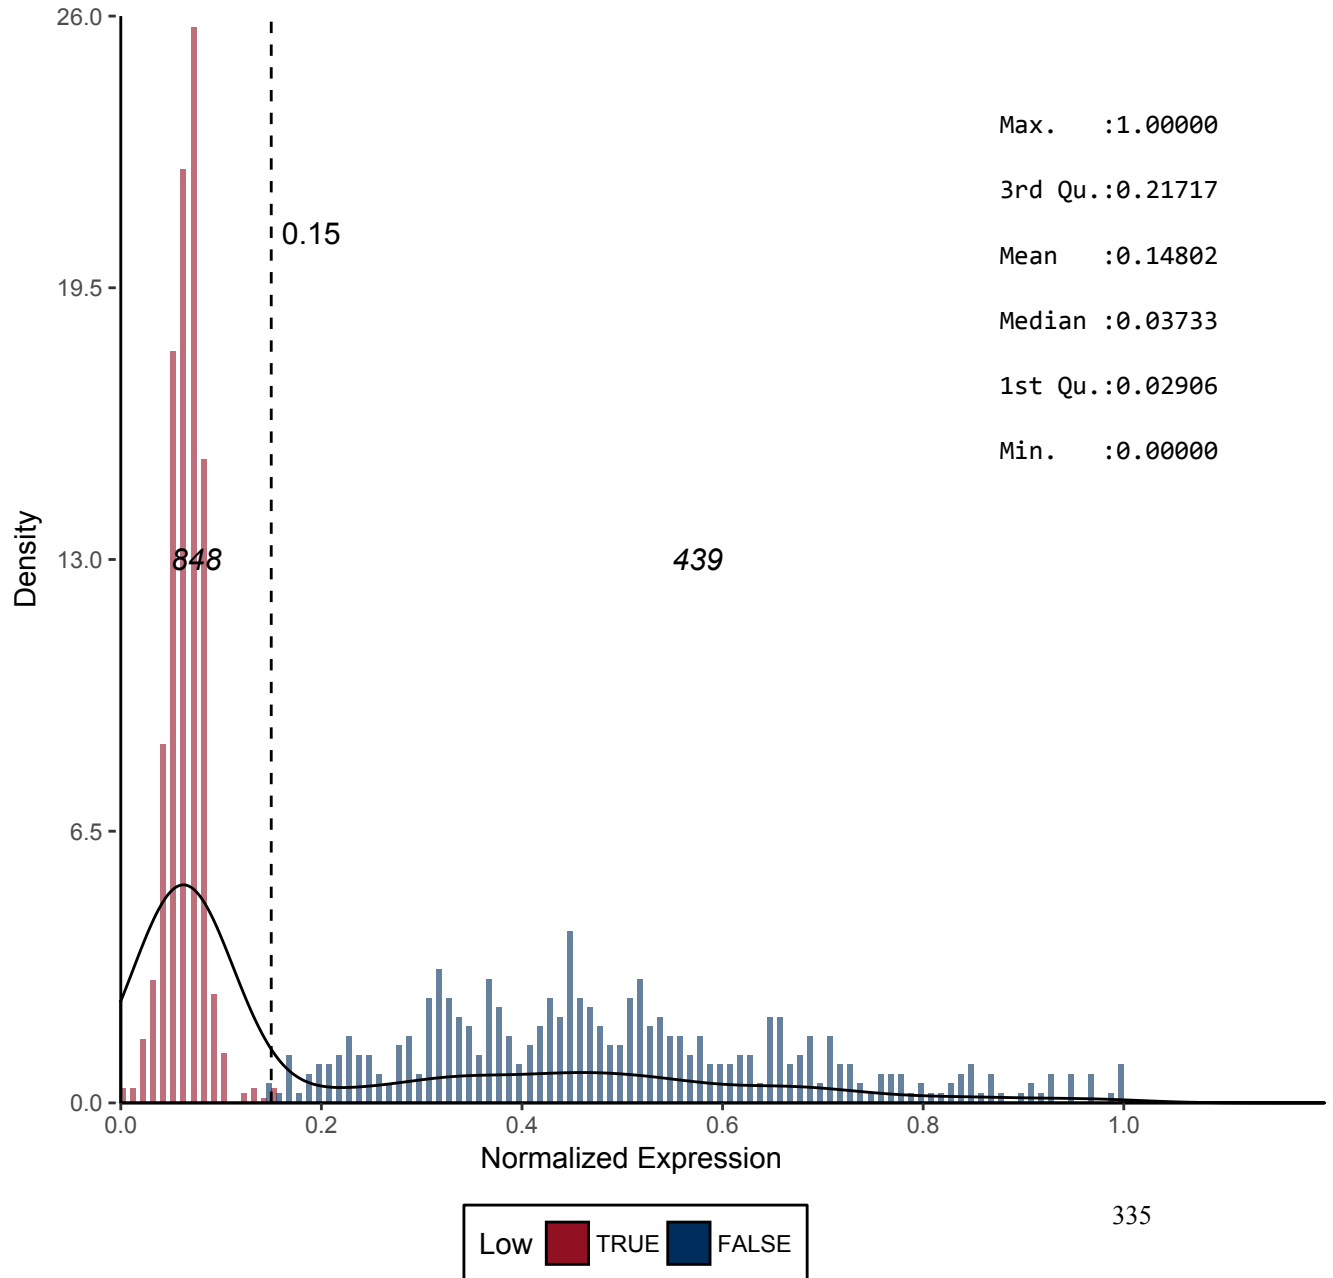

Figure 319 - CD324\*

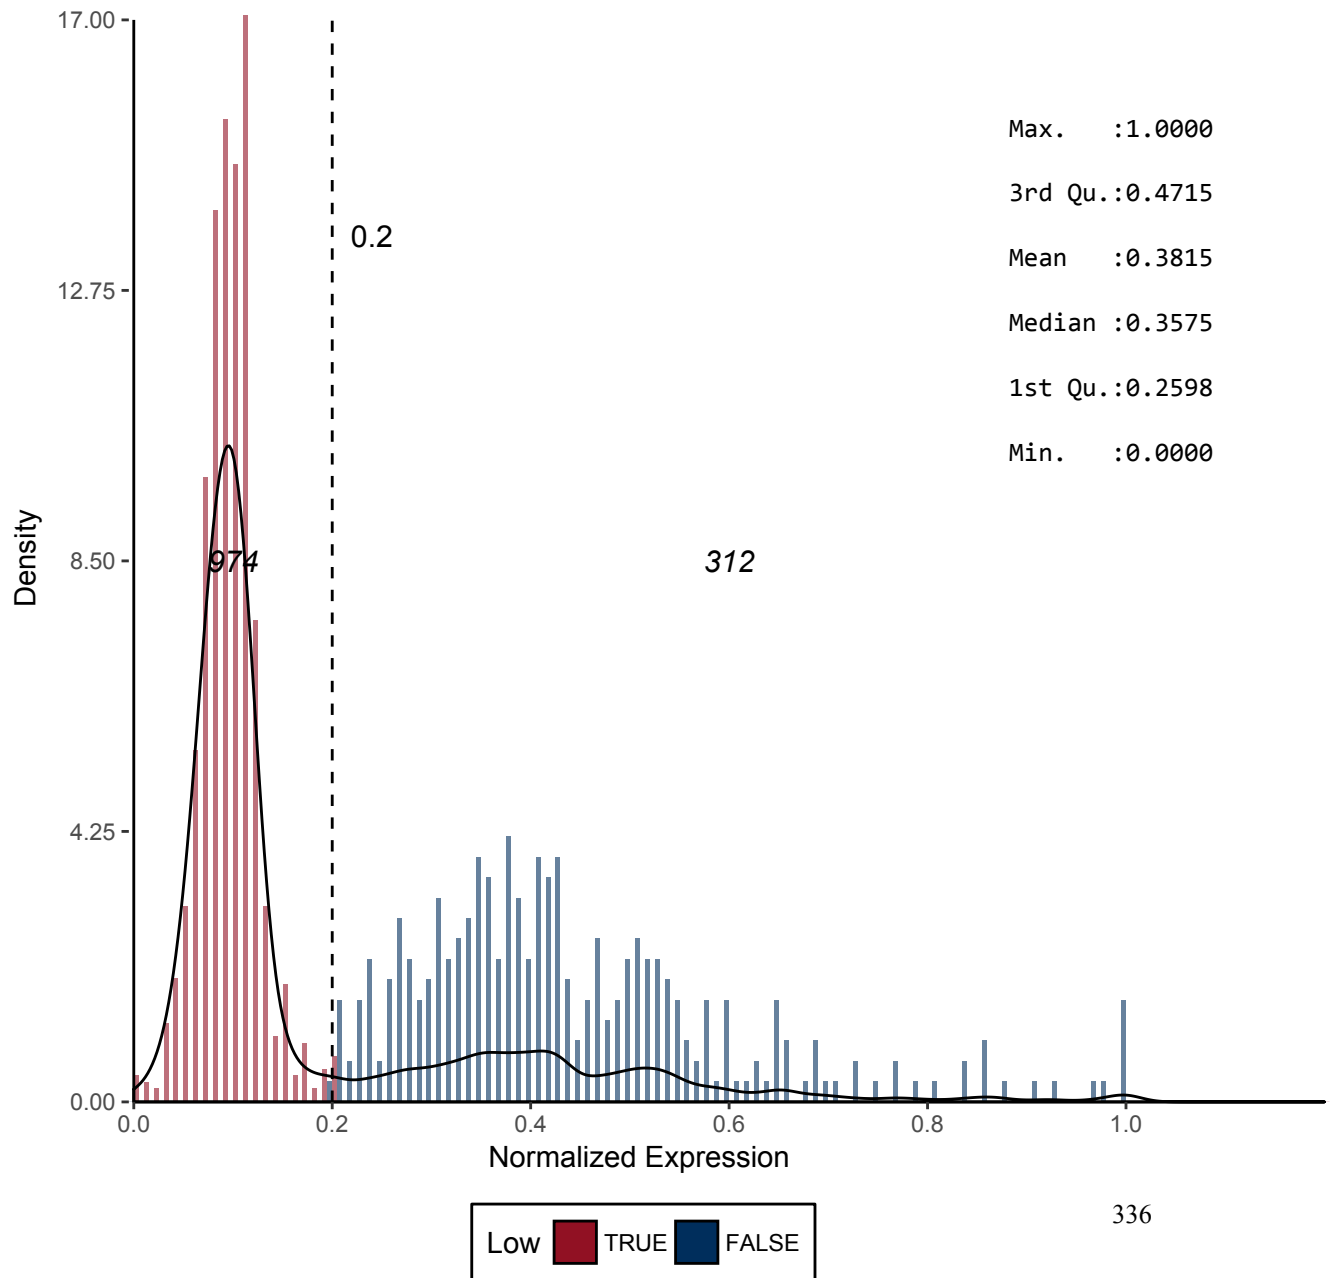



Figure 320 - CD325

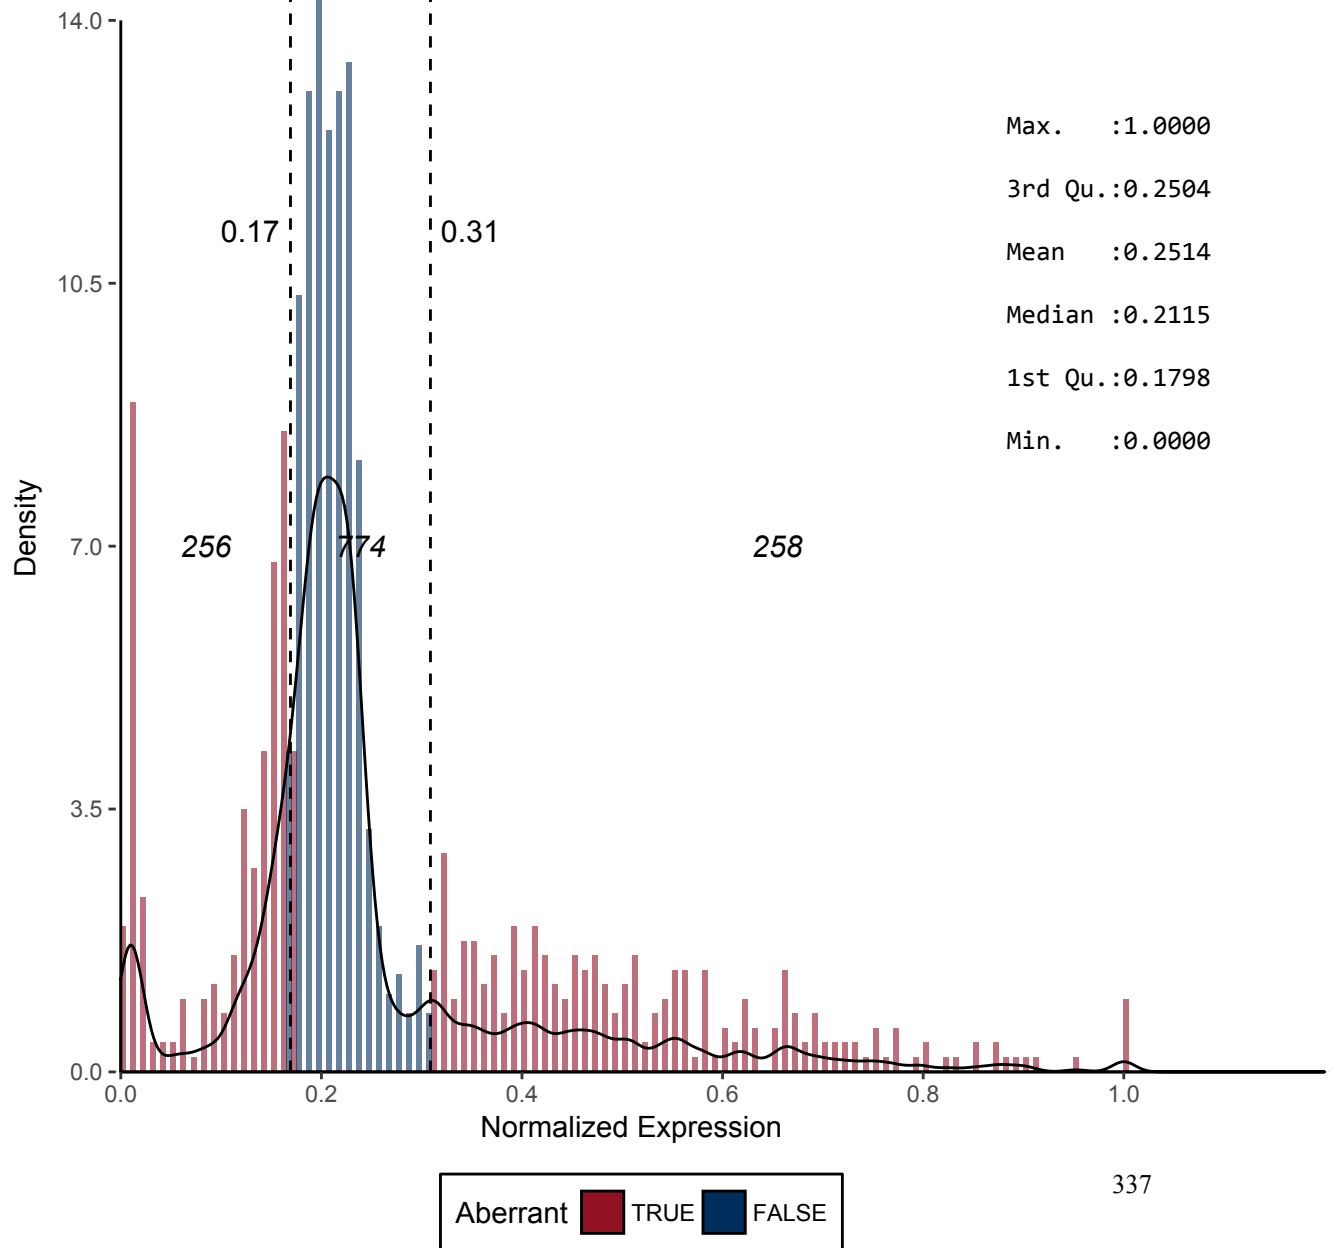

Figure 321 - CD326\*

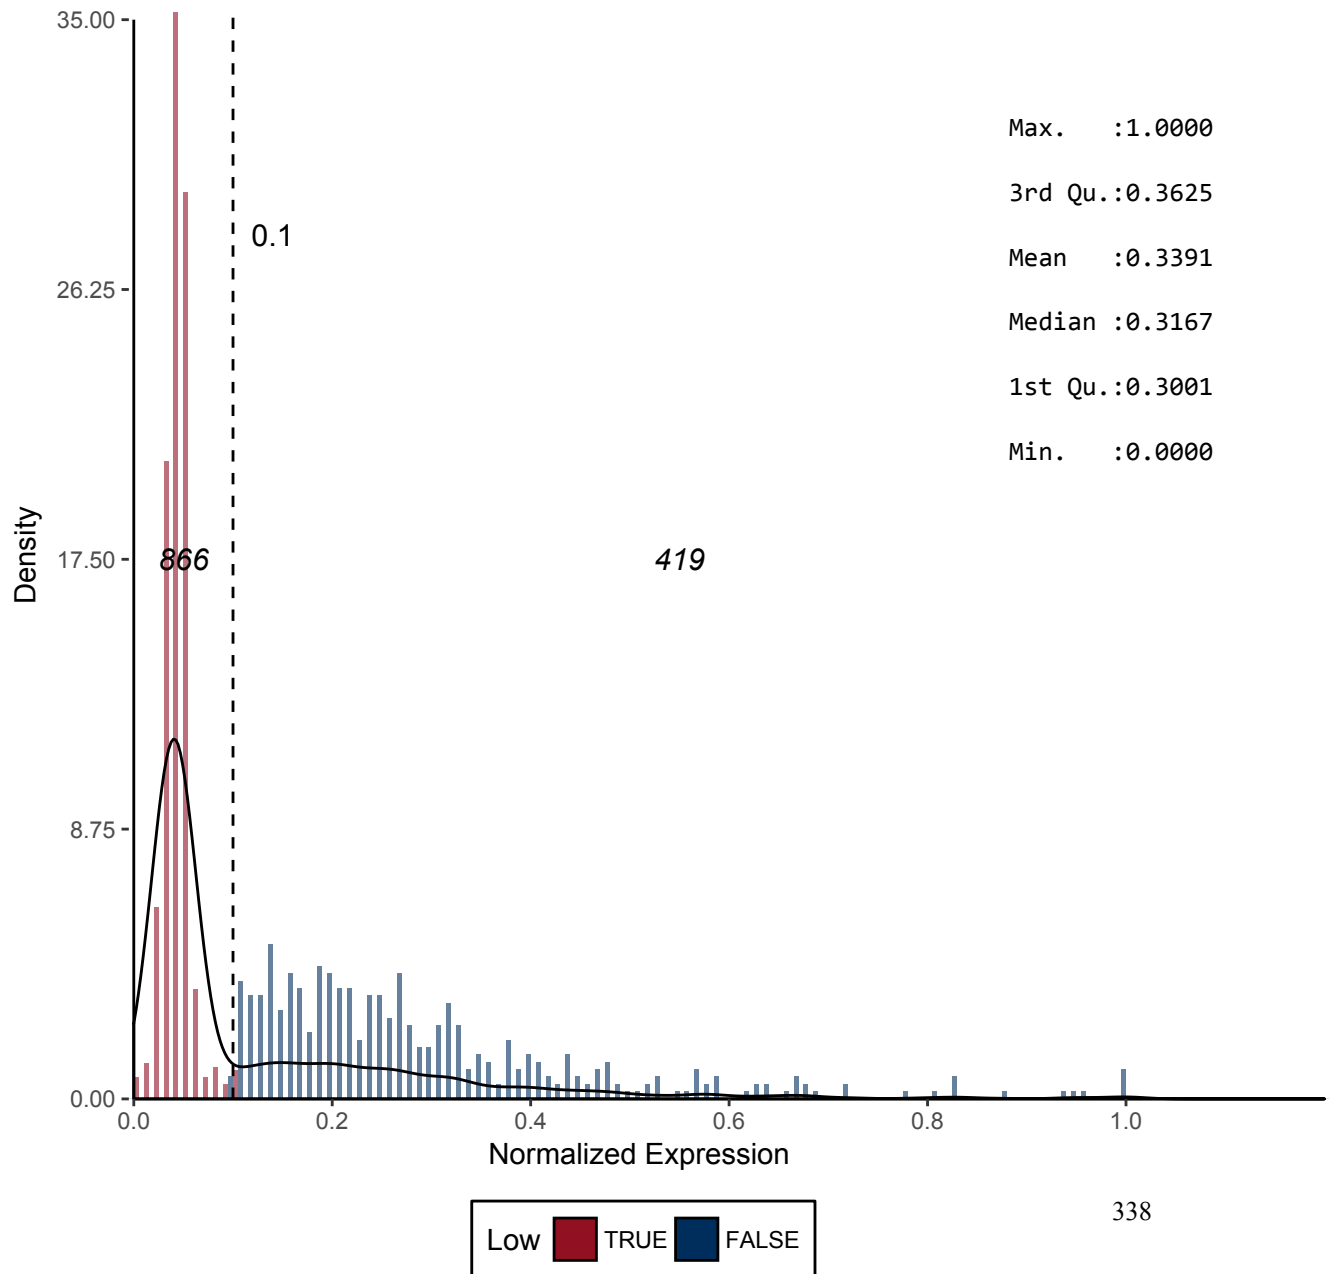

Figure 322 - CD327

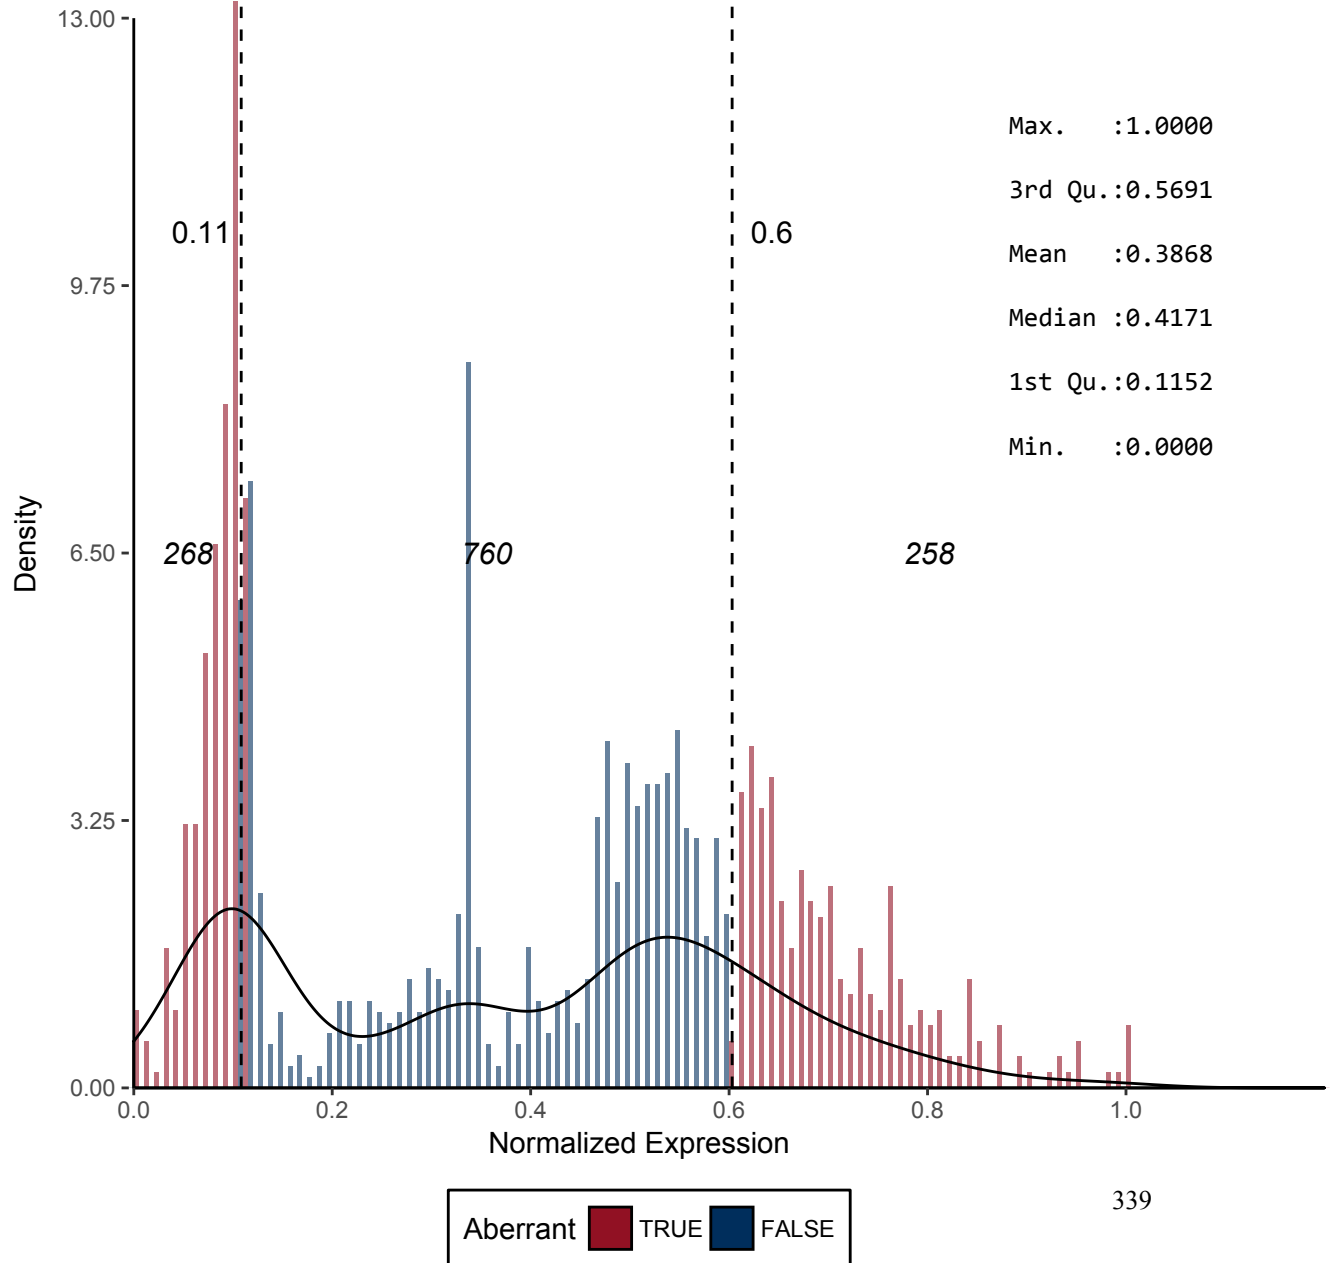

Figure 323 - CD328

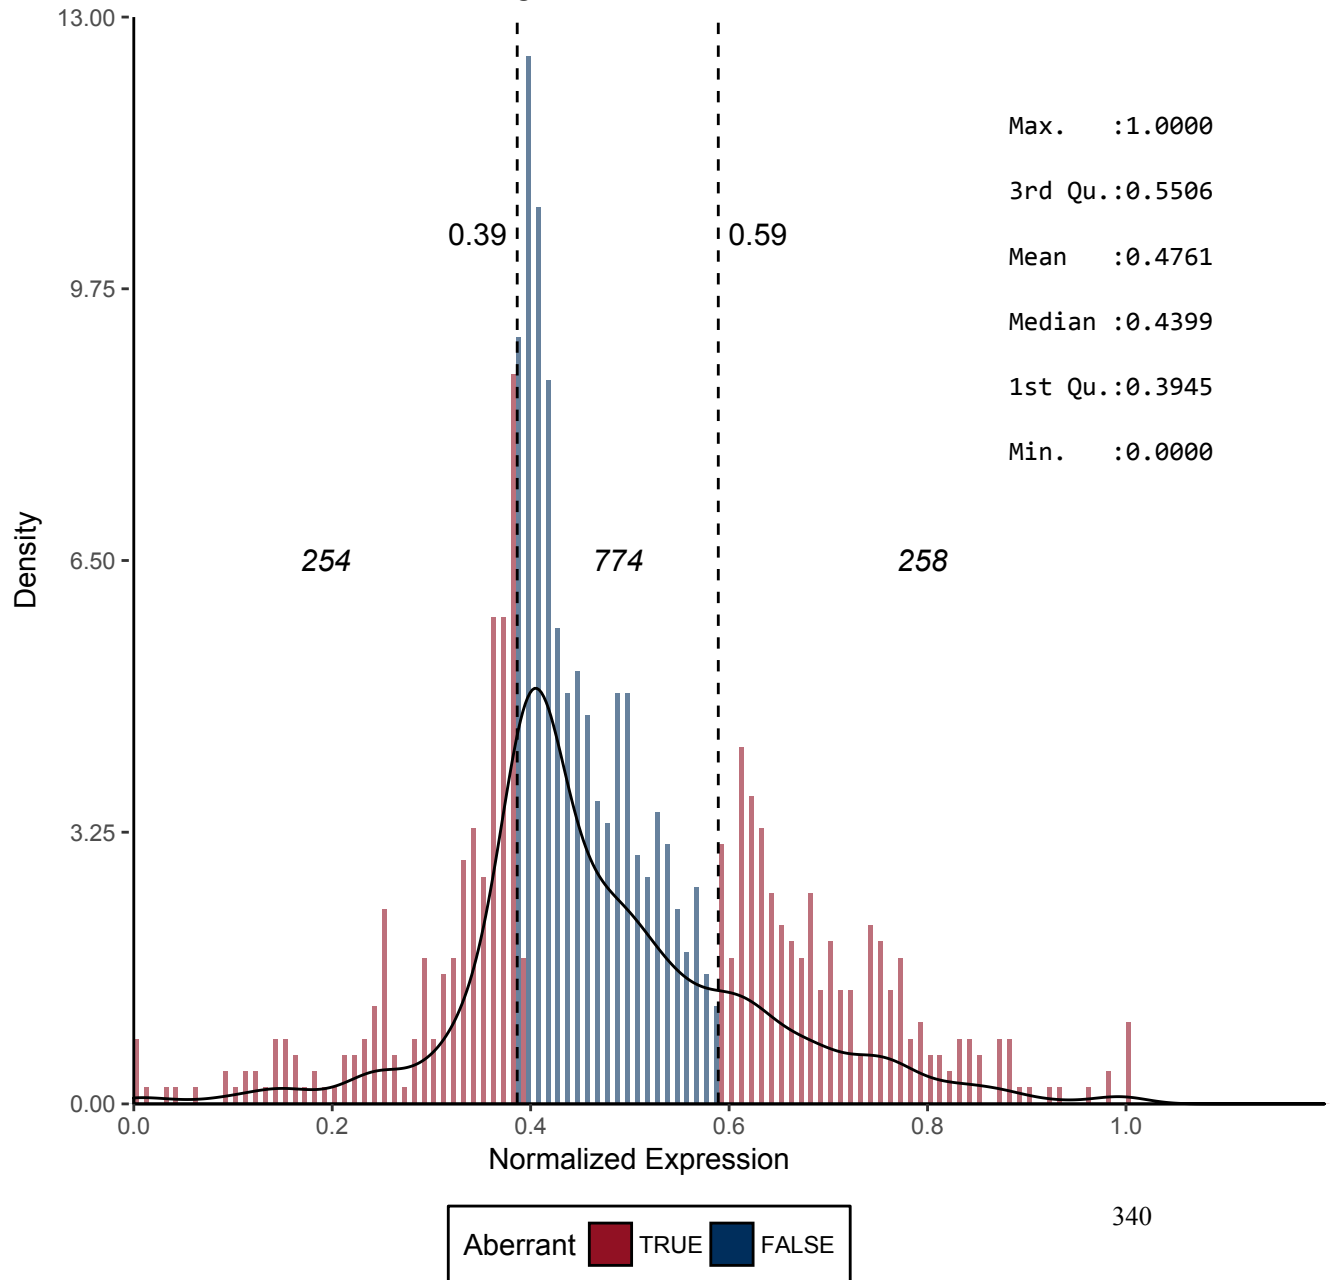

Figure 324 - CD329

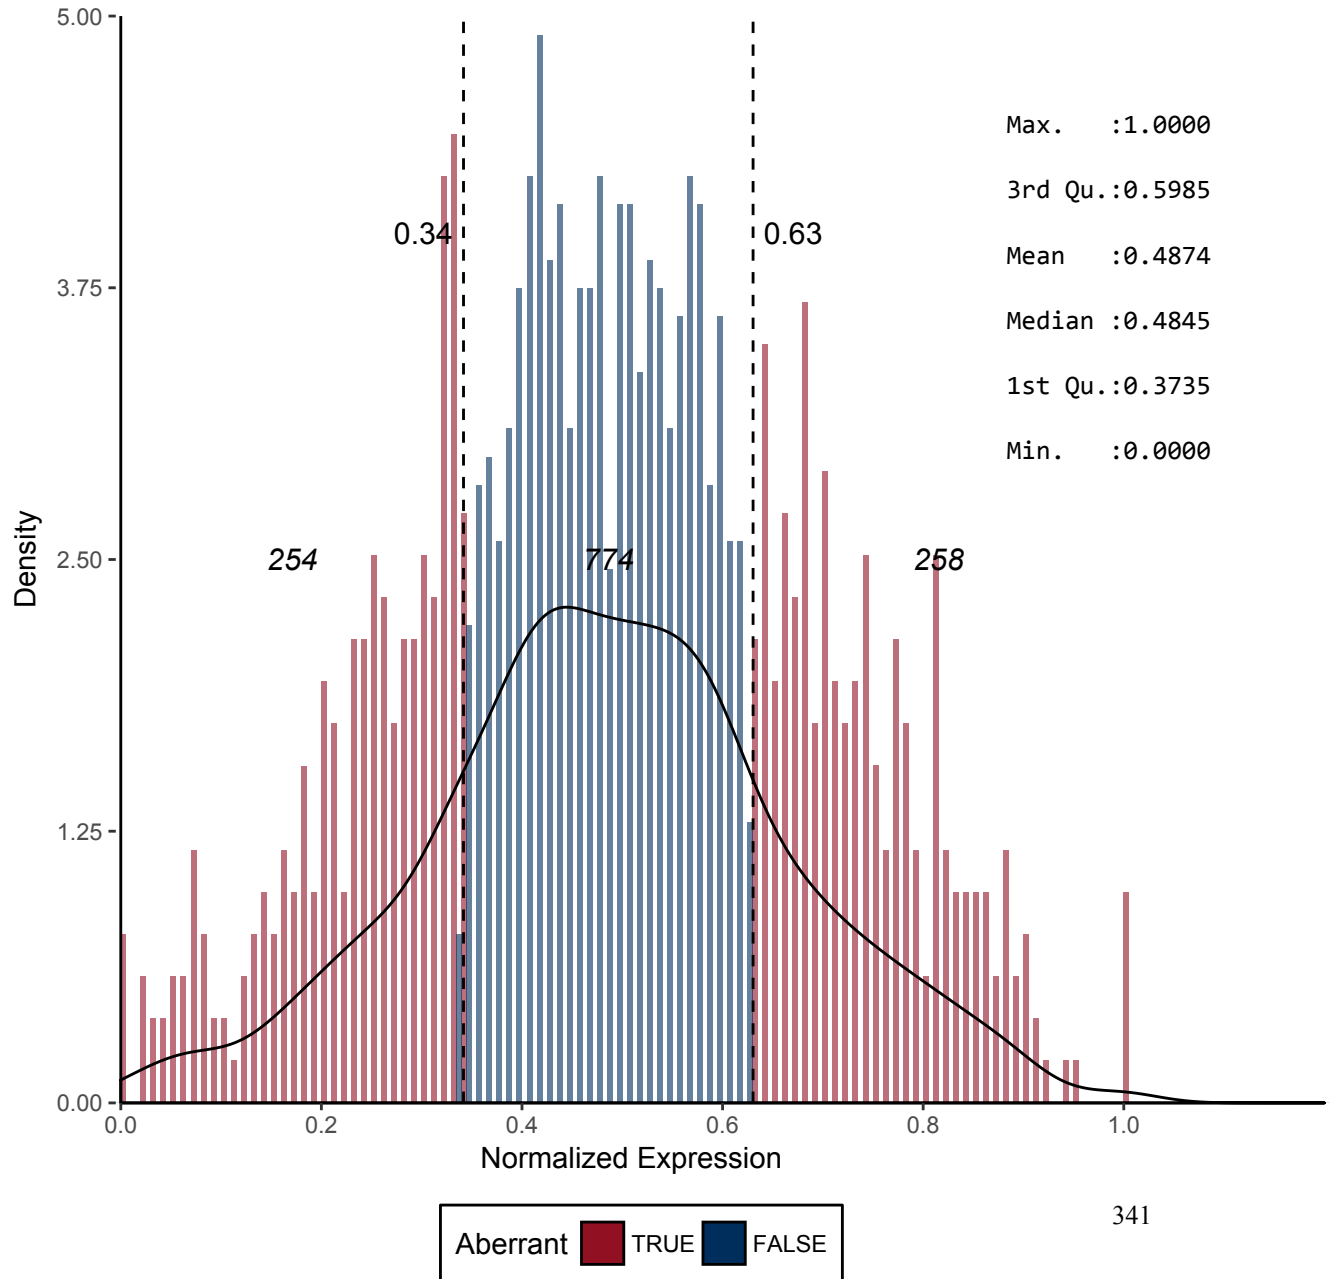

Figure 325 - CD331\*

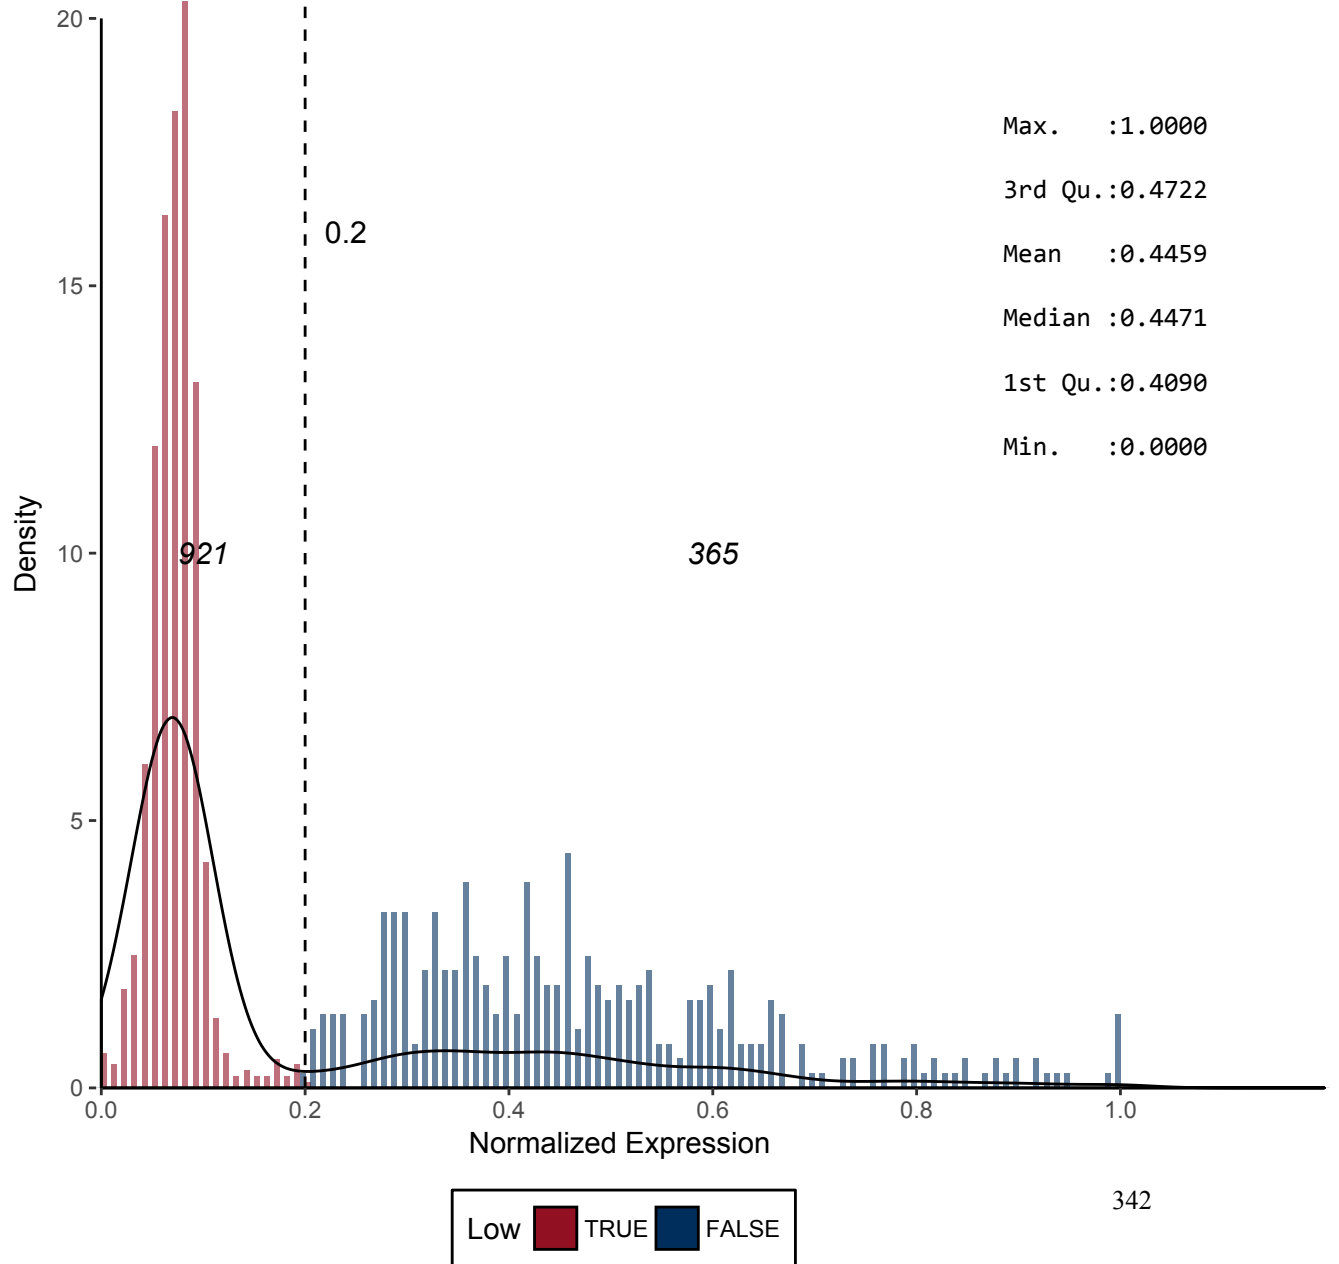

Figure 326 - CD332

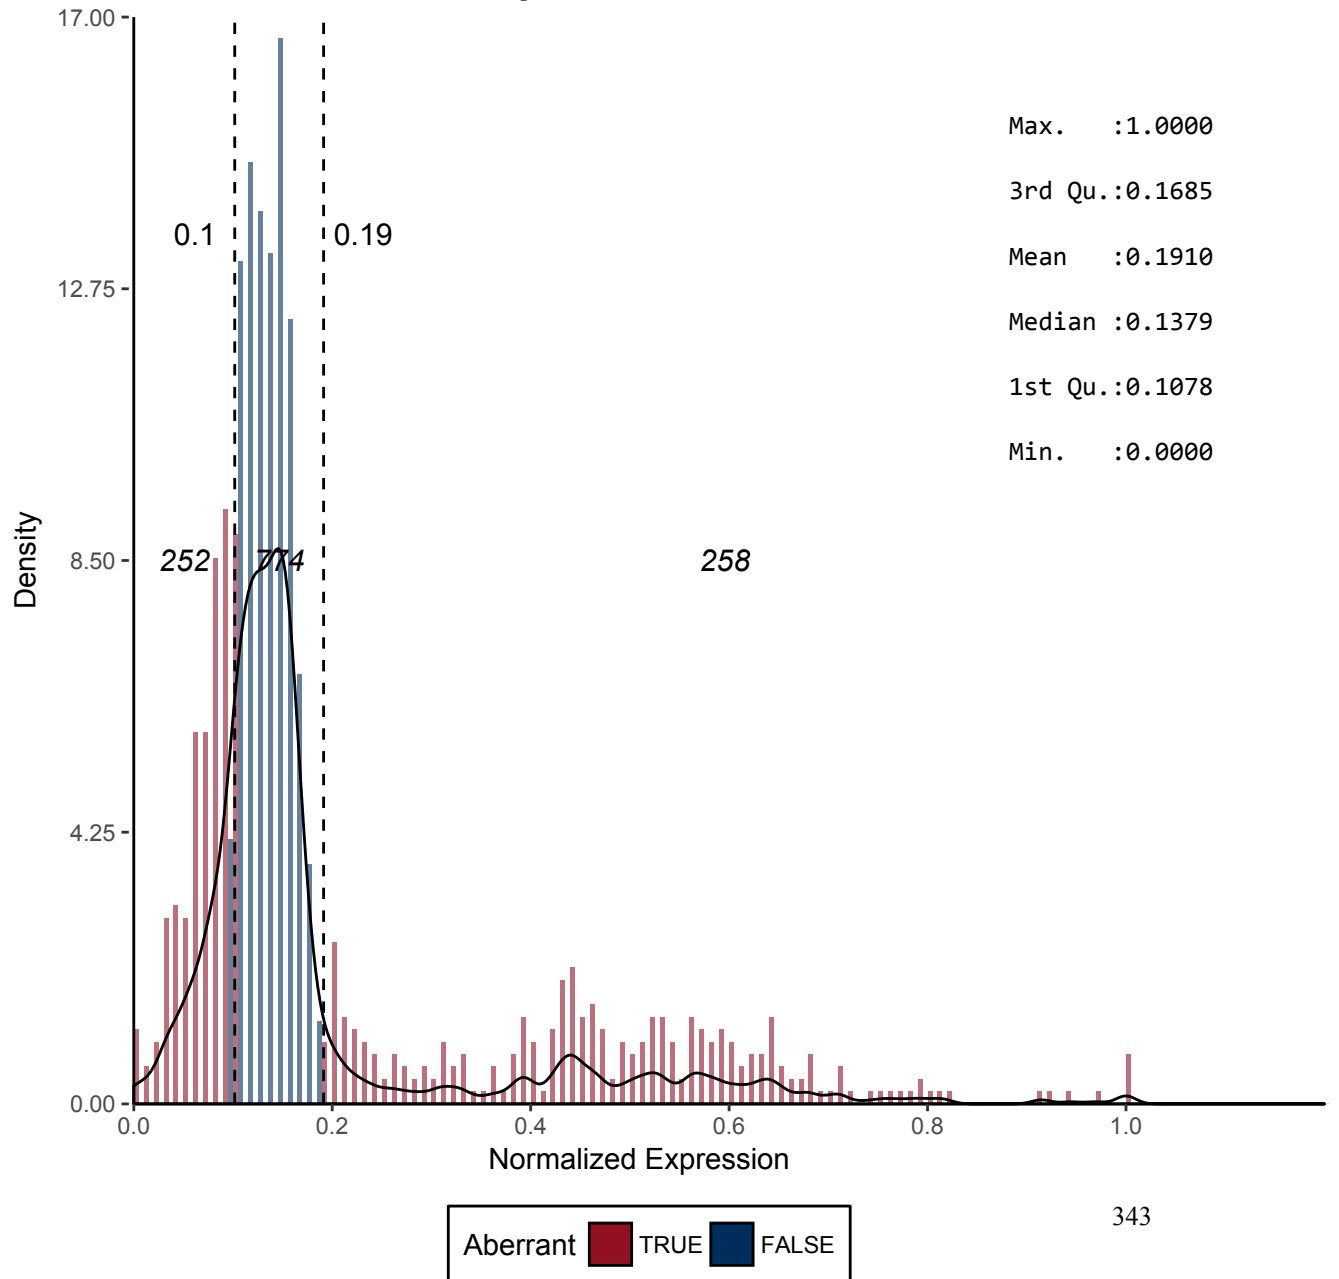

Figure 327 - CD333\*

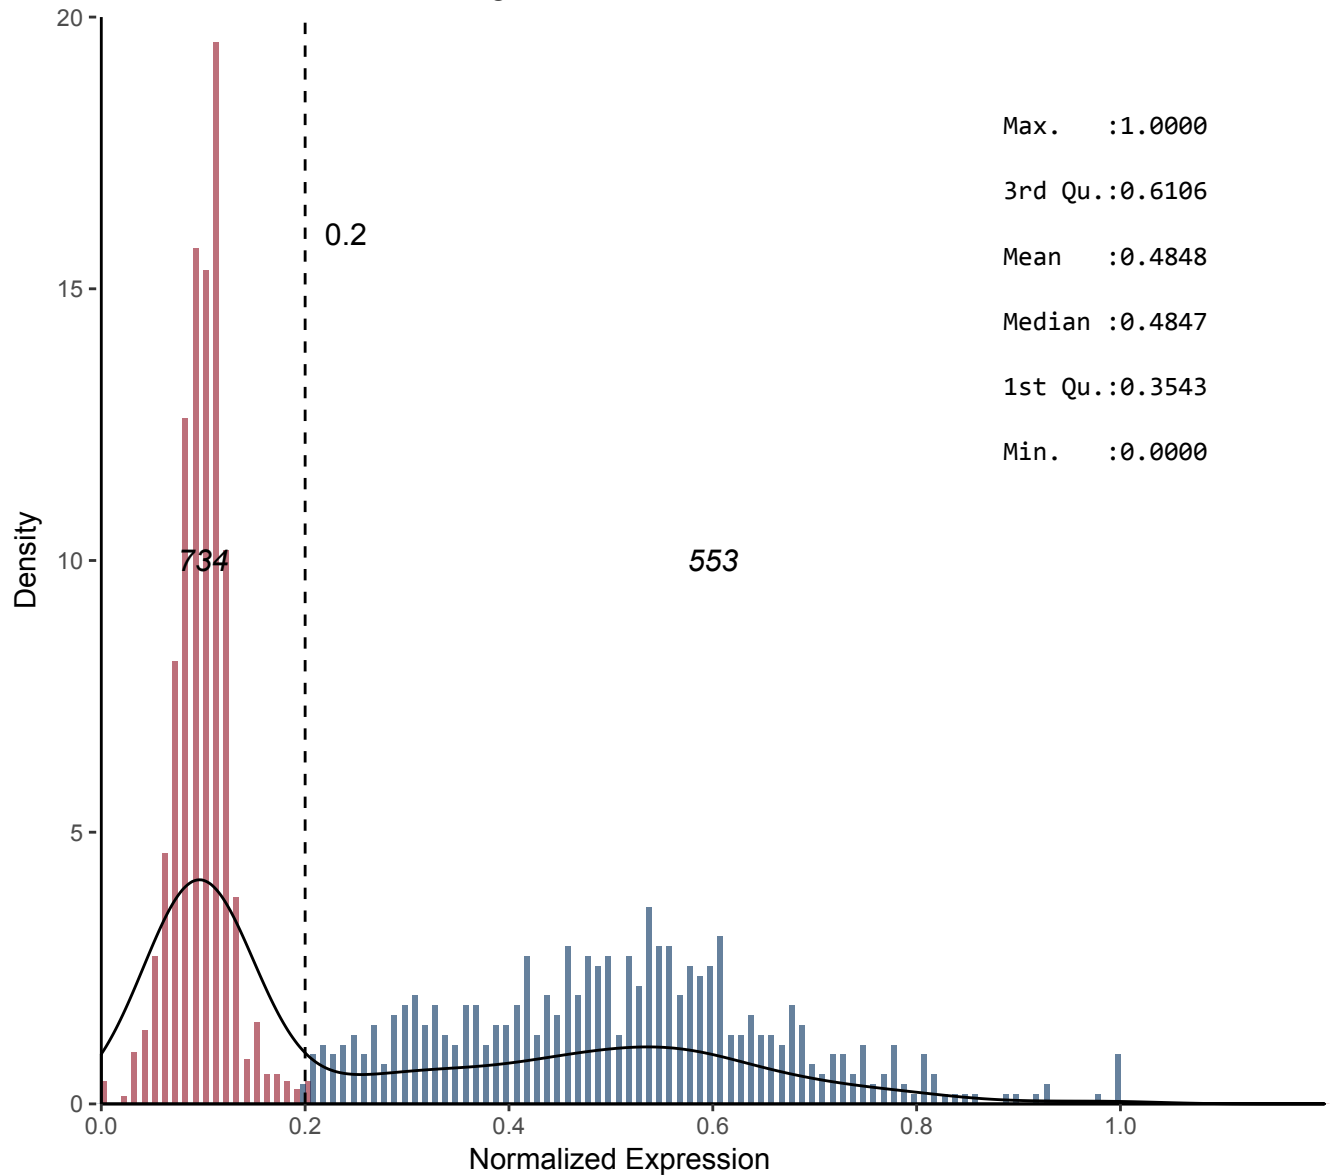

Low ■ TRUE ■ FALSE

344



Figure 328 - CD334\*

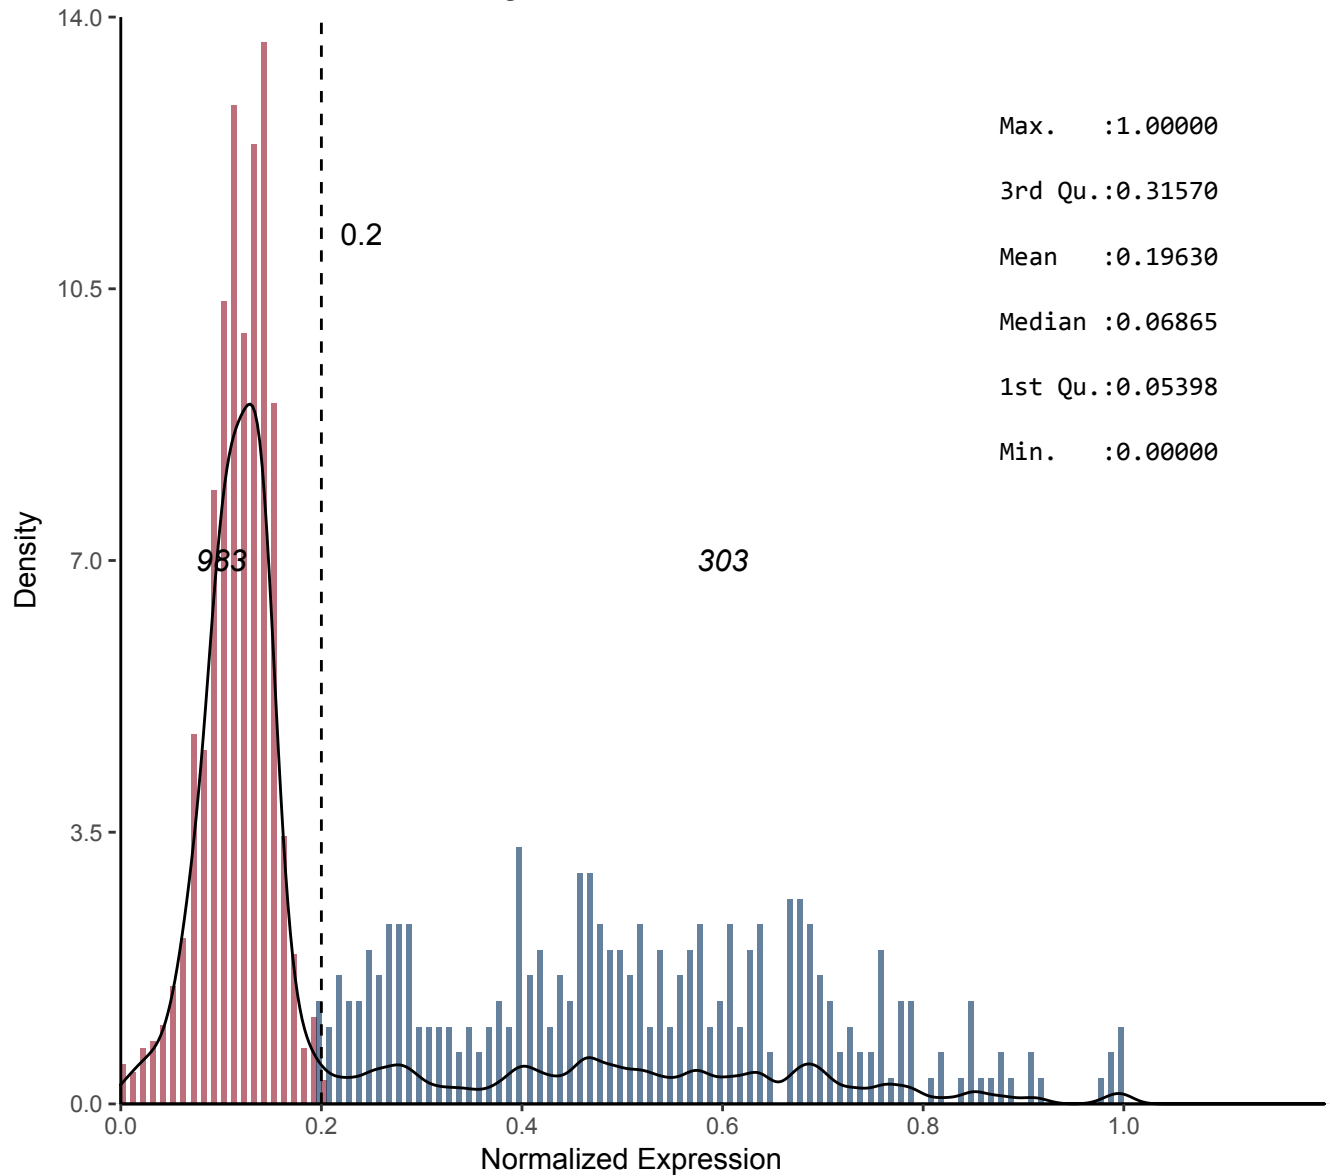

Low ■ TRUE ■ FALSE

Figure 329 - CD335\*

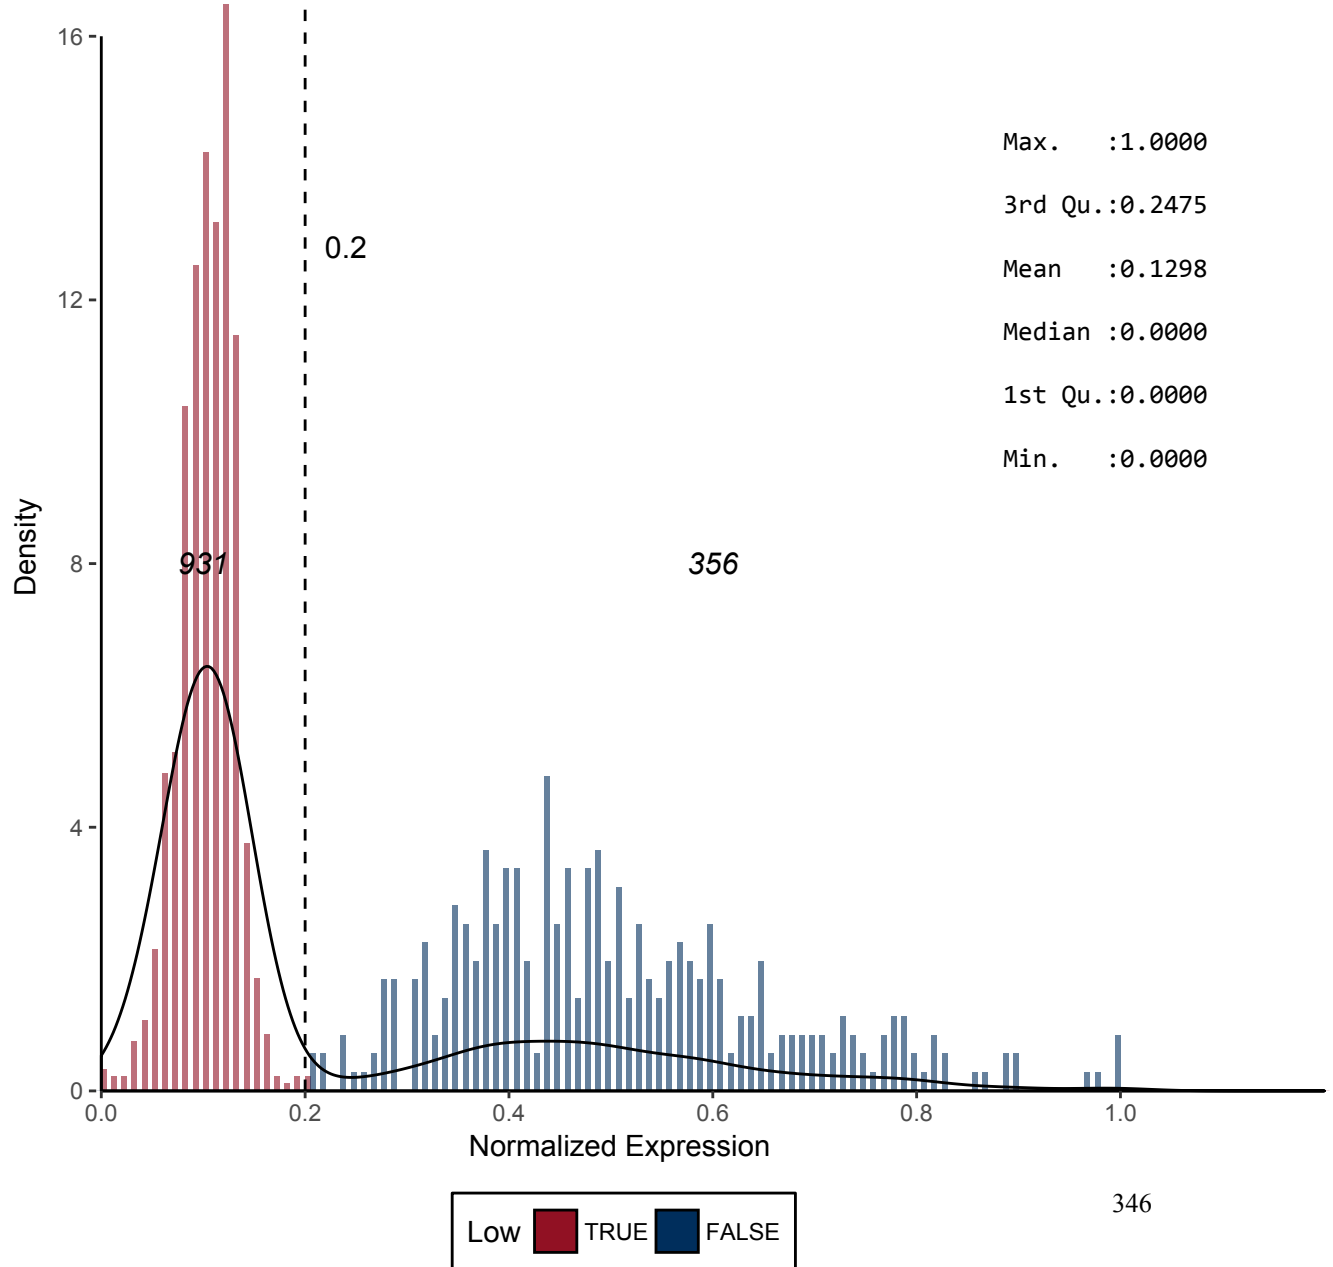

Figure 330 - CD336\*

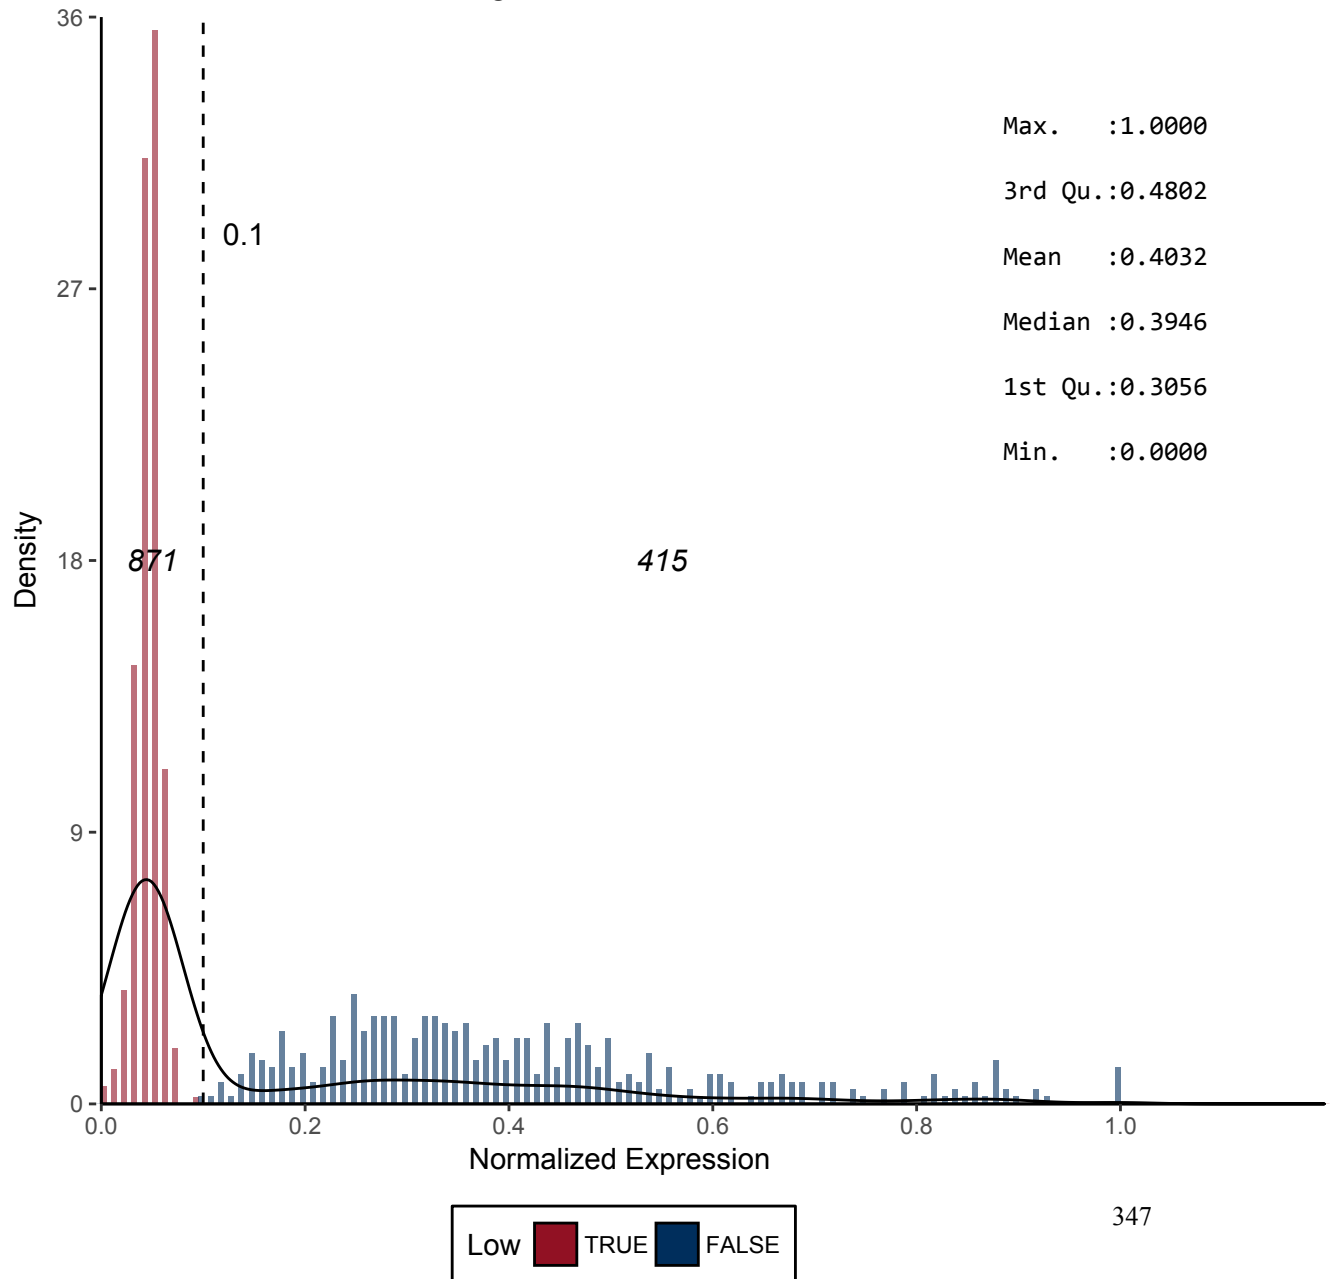

Figure 331 - CD337

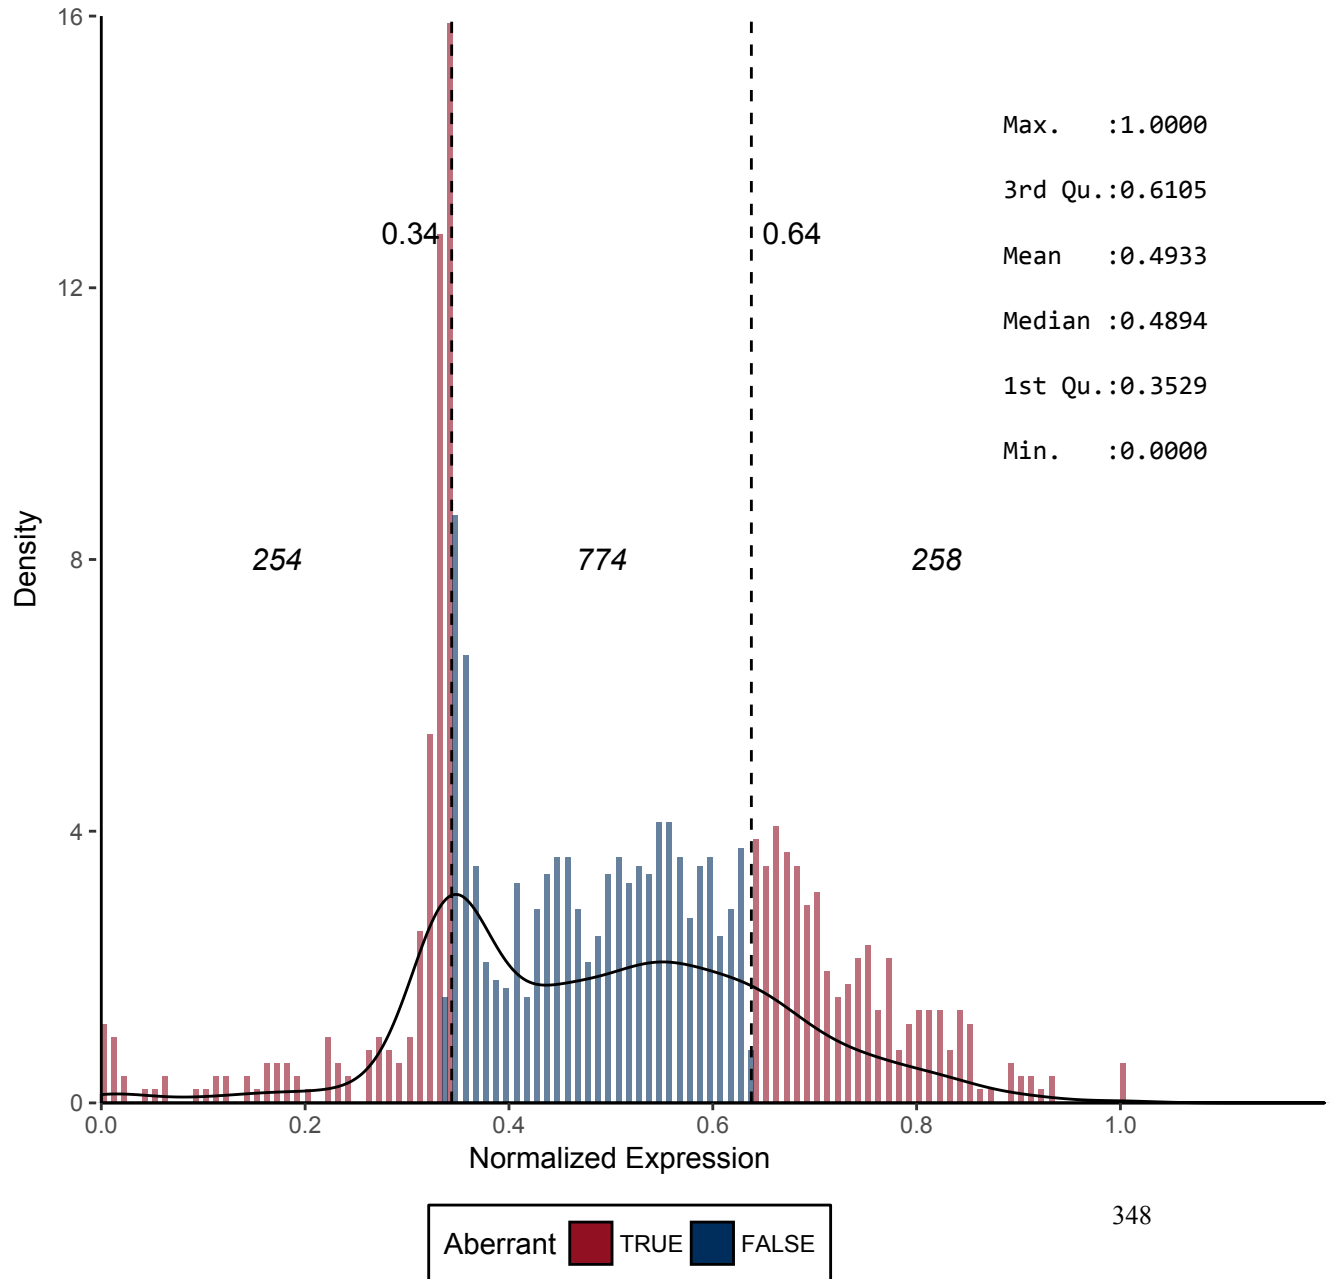

Figure 332 - CD338\*

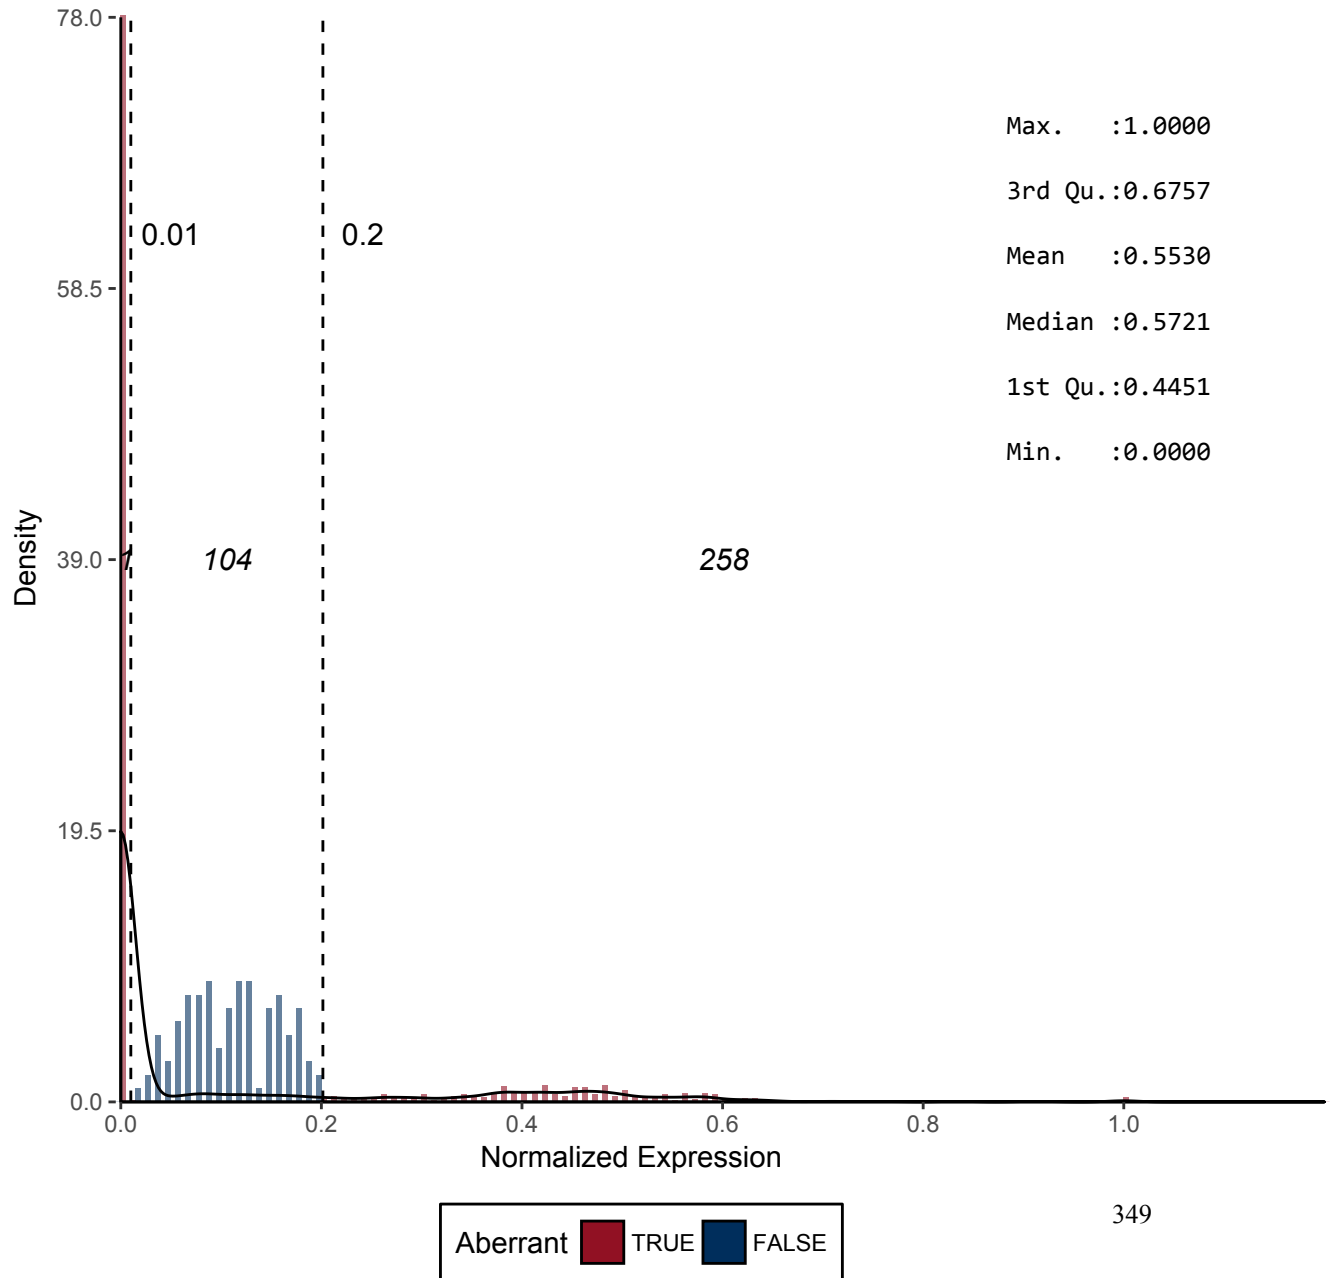

Figure 333 - CD339\*

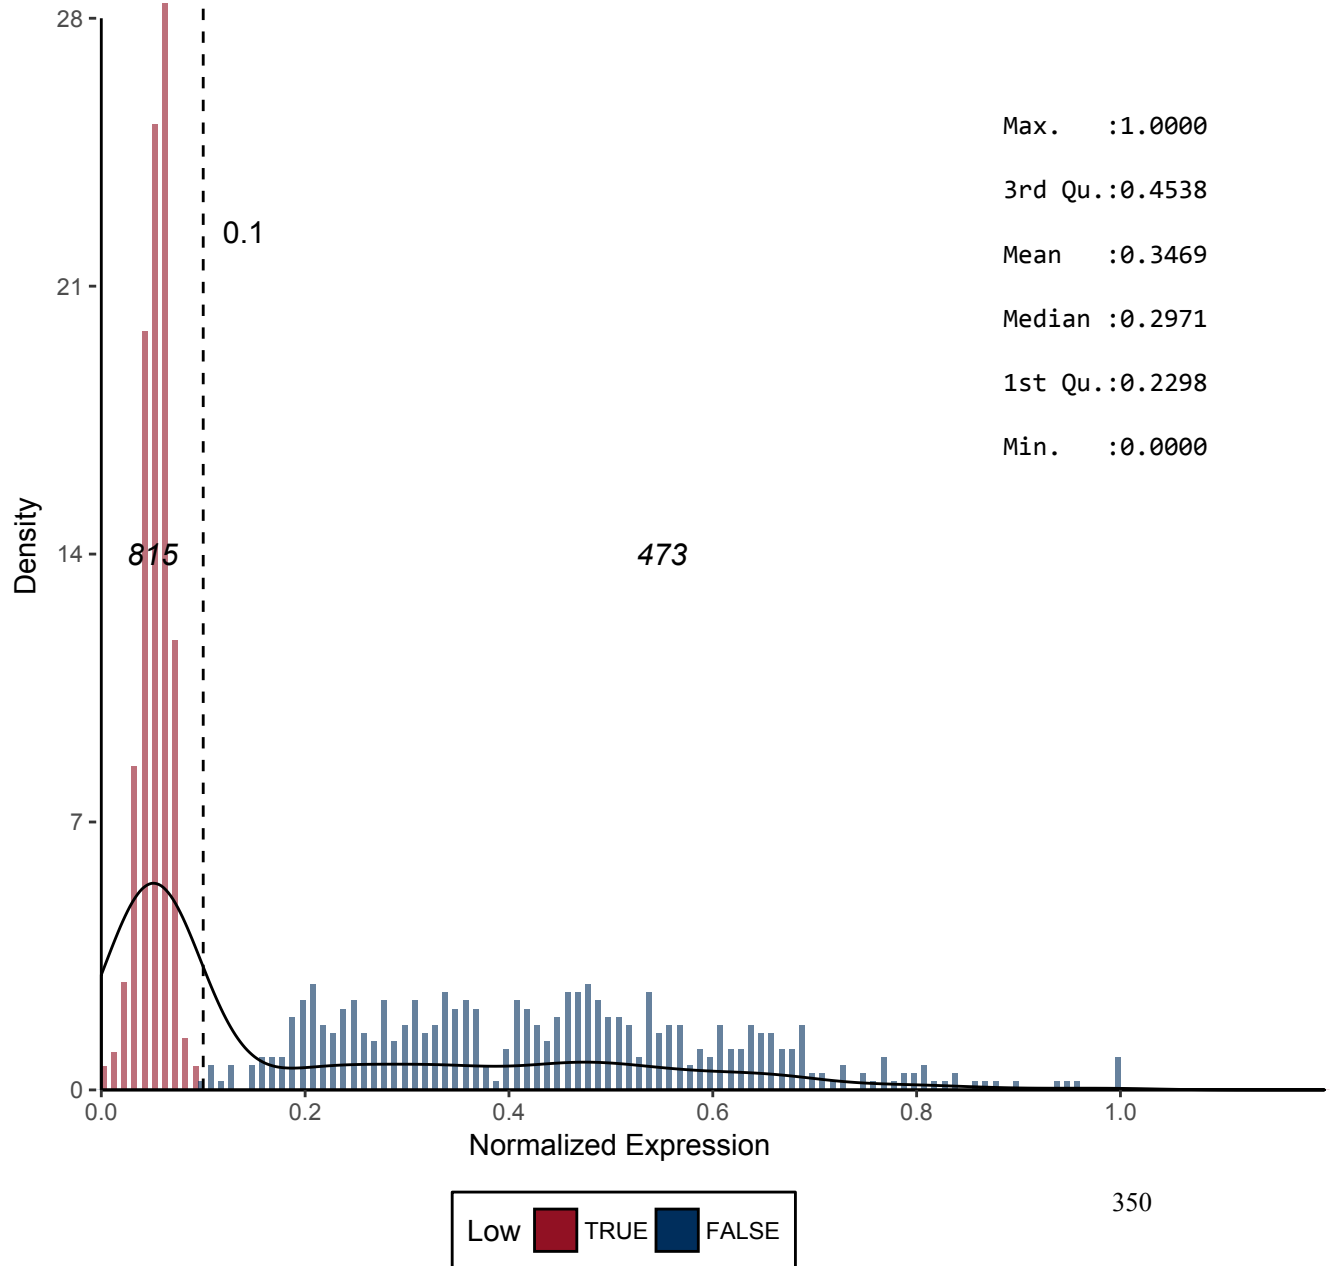

Figure 334 - CD340

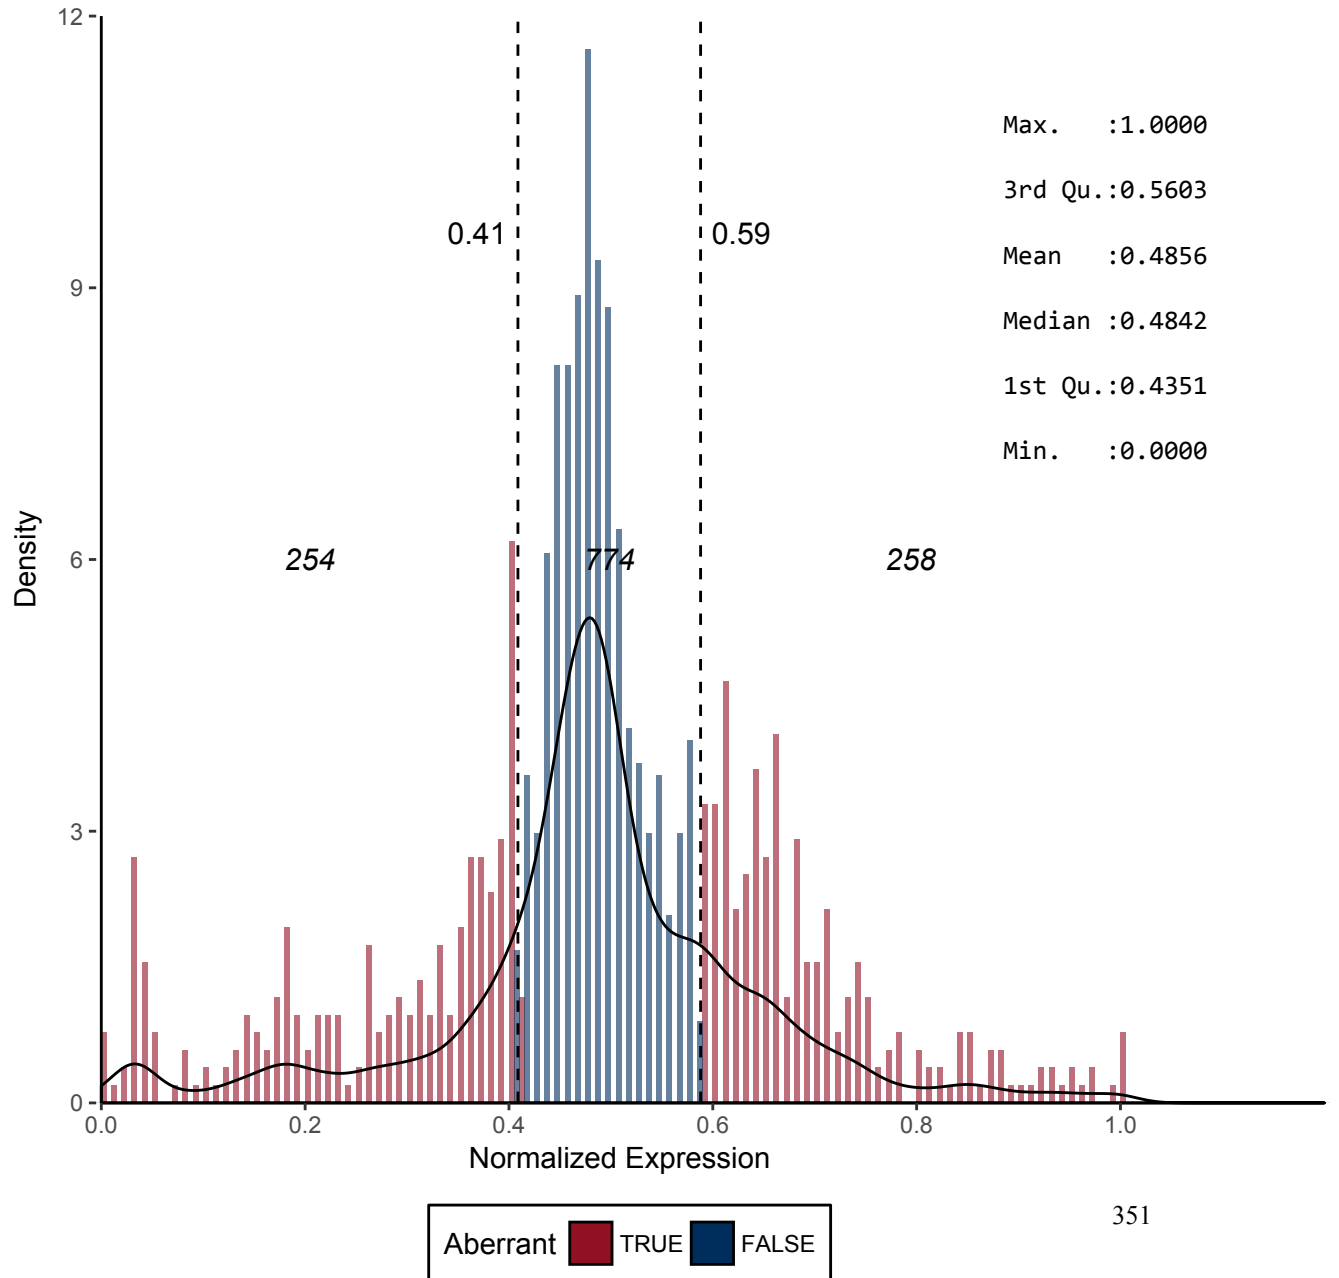

Figure 335 - CD344\*

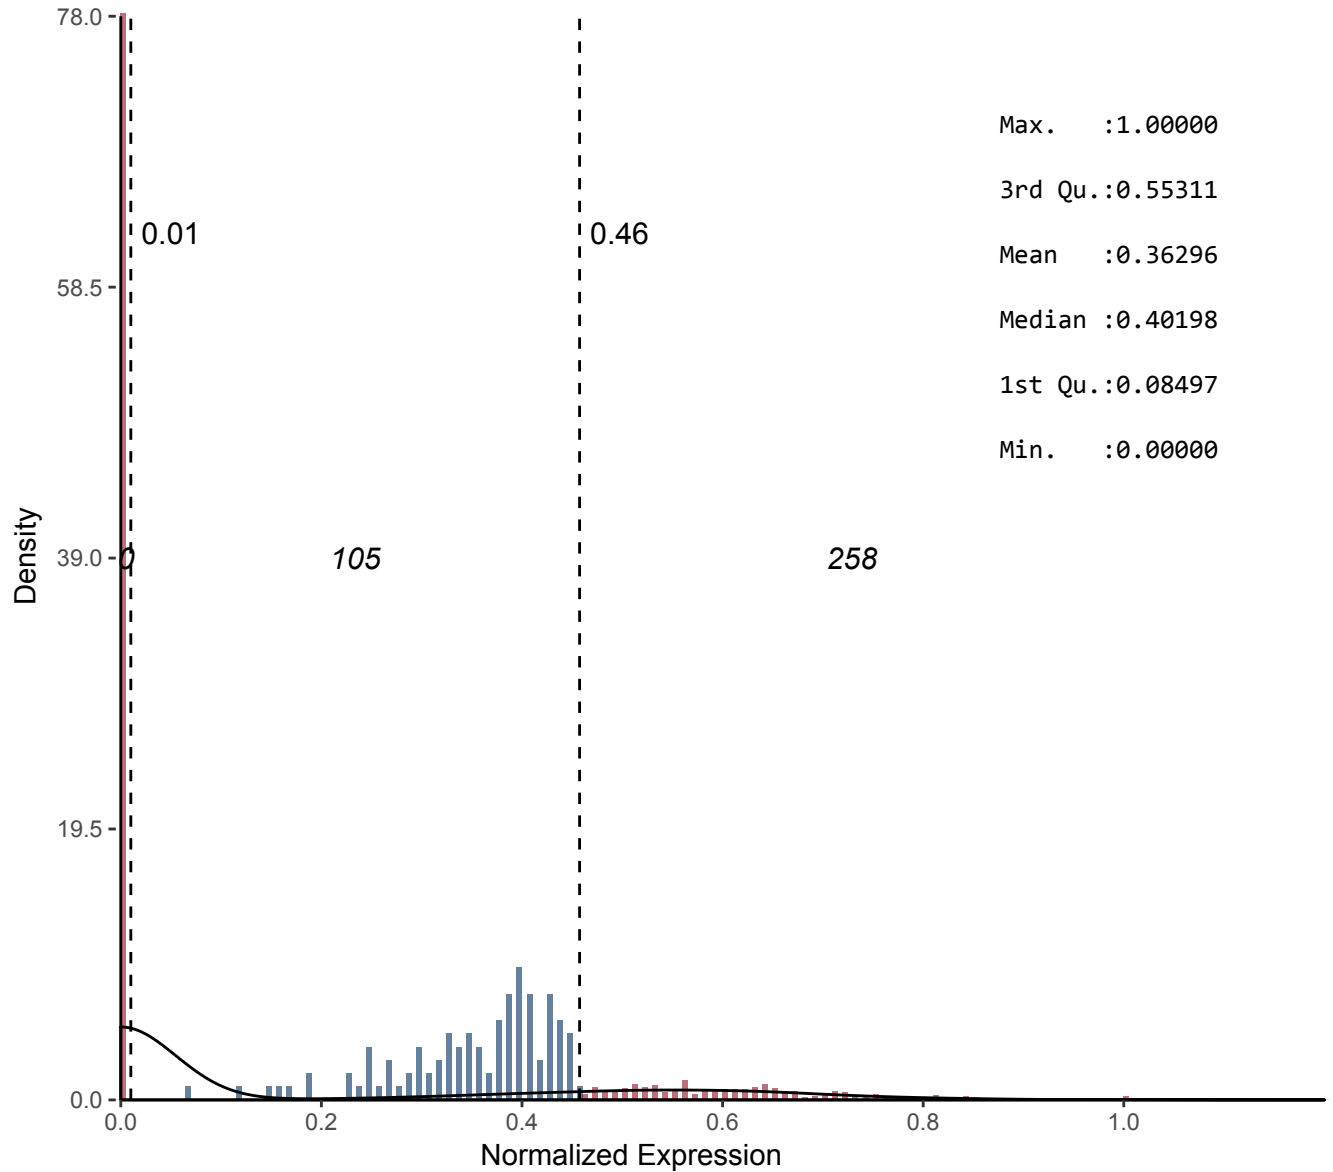



Figure 336 - CD349\*

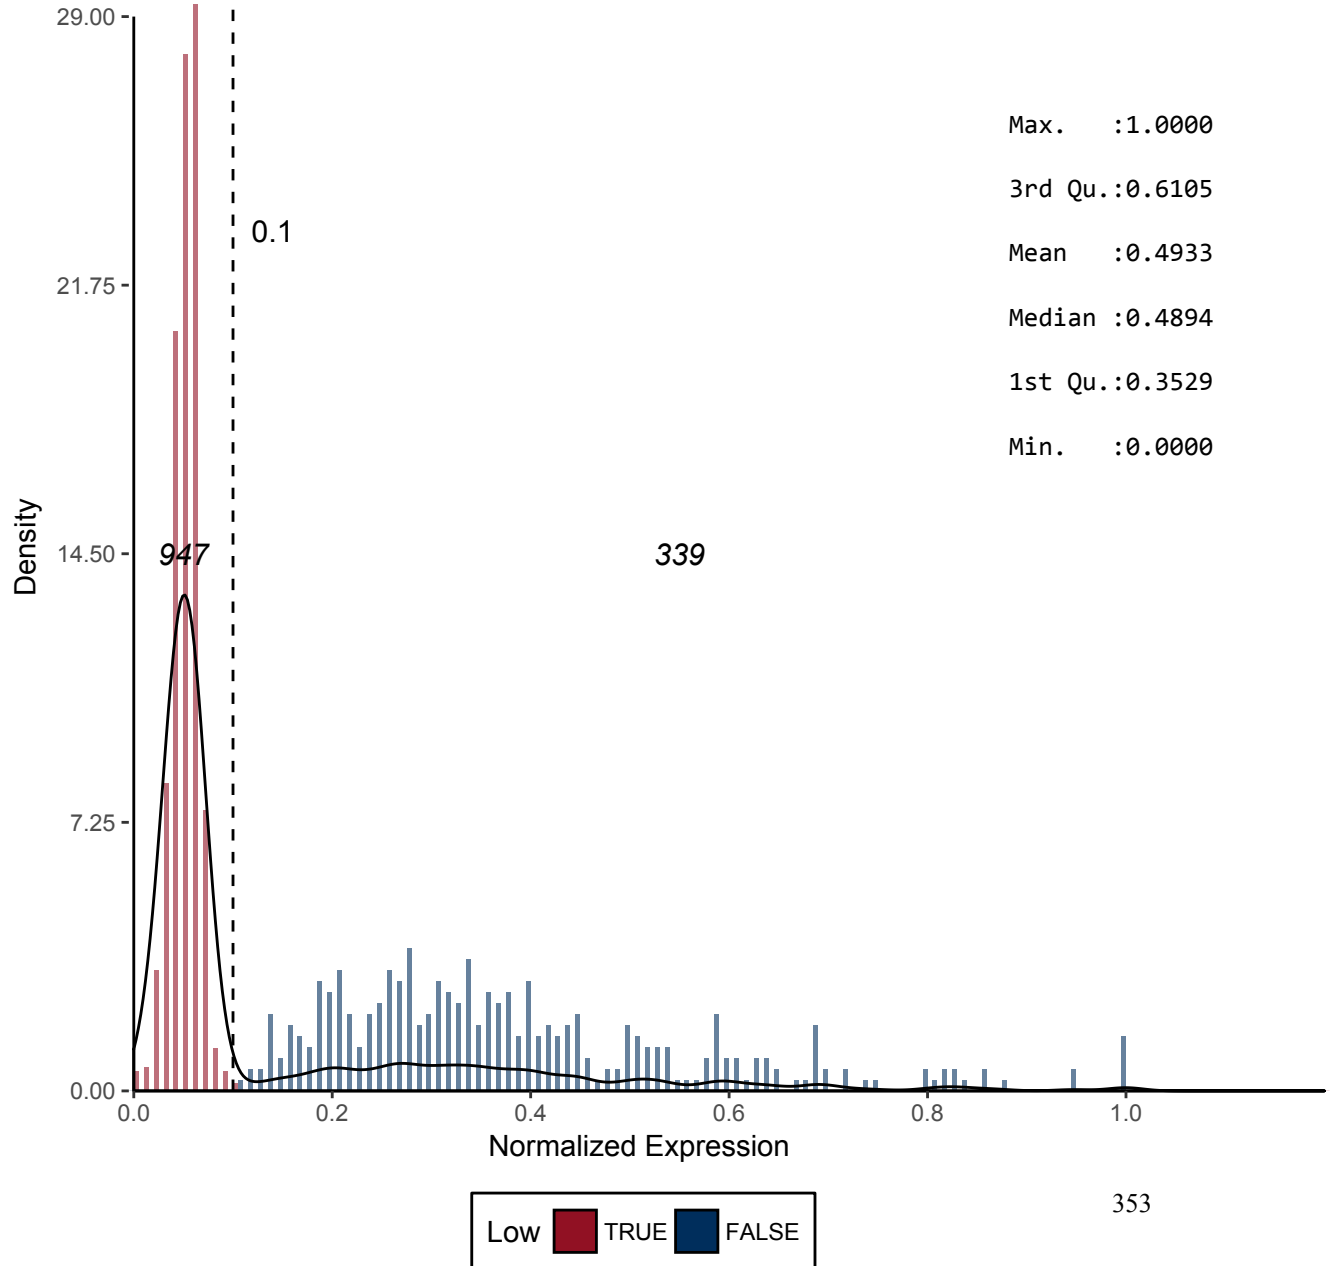

Figure 337 - CD350\*

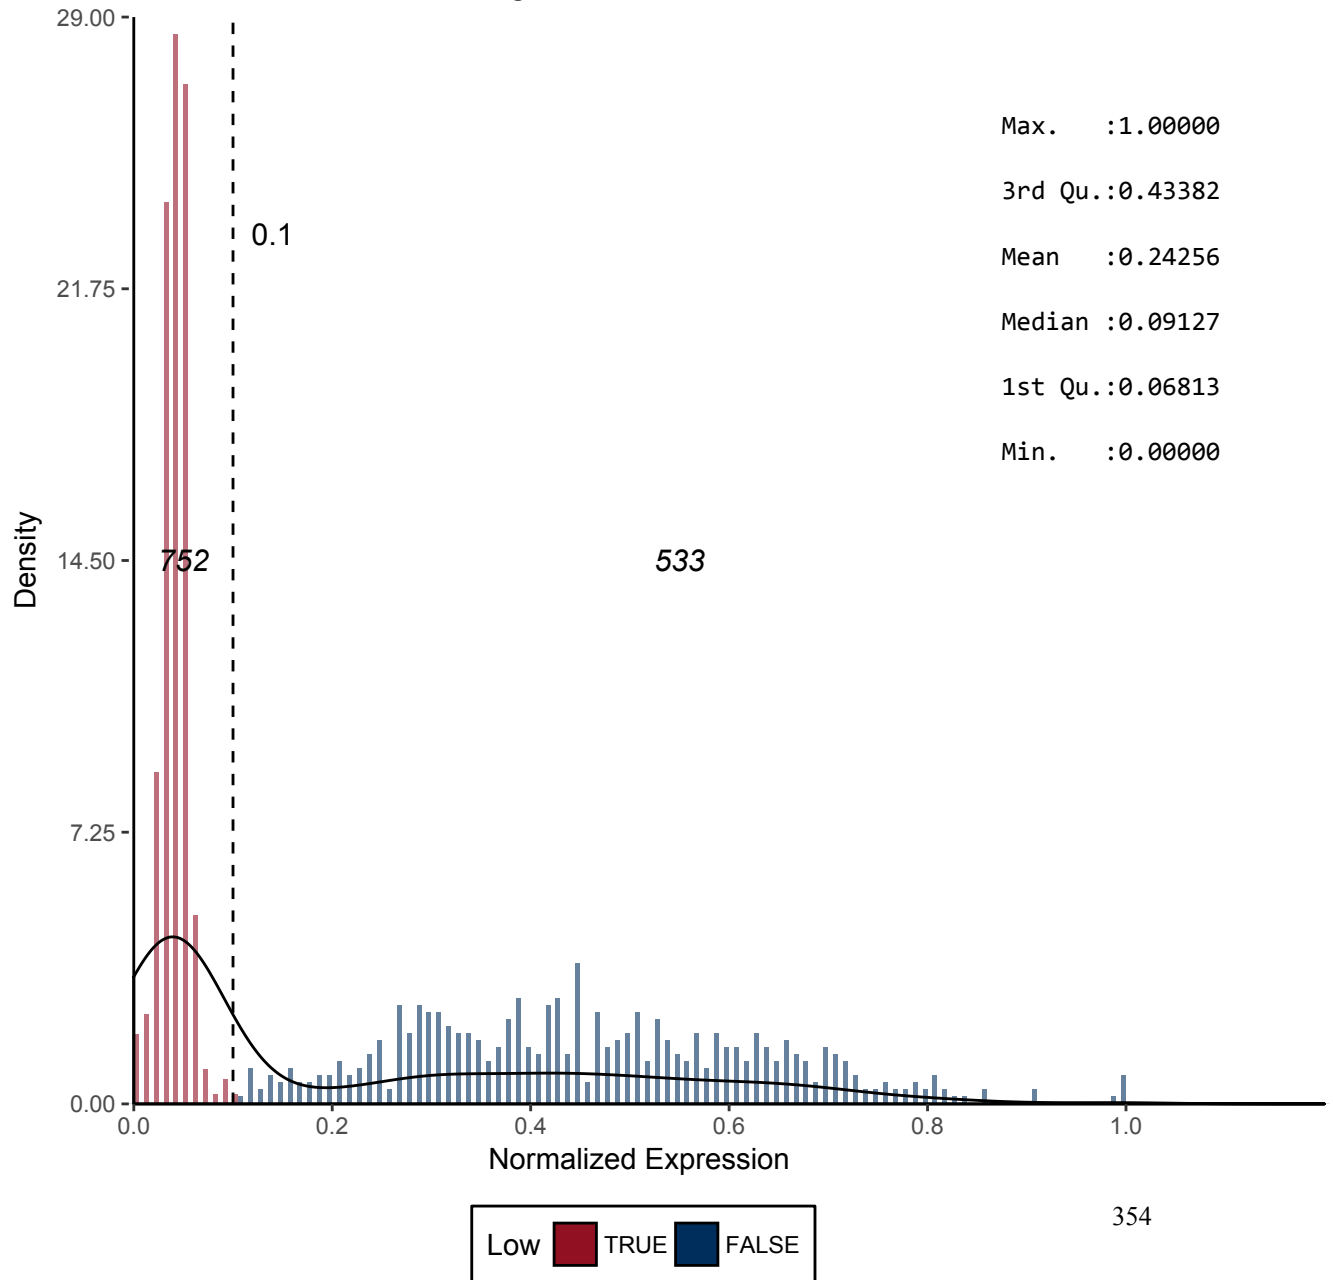

Figure 338 - CD351

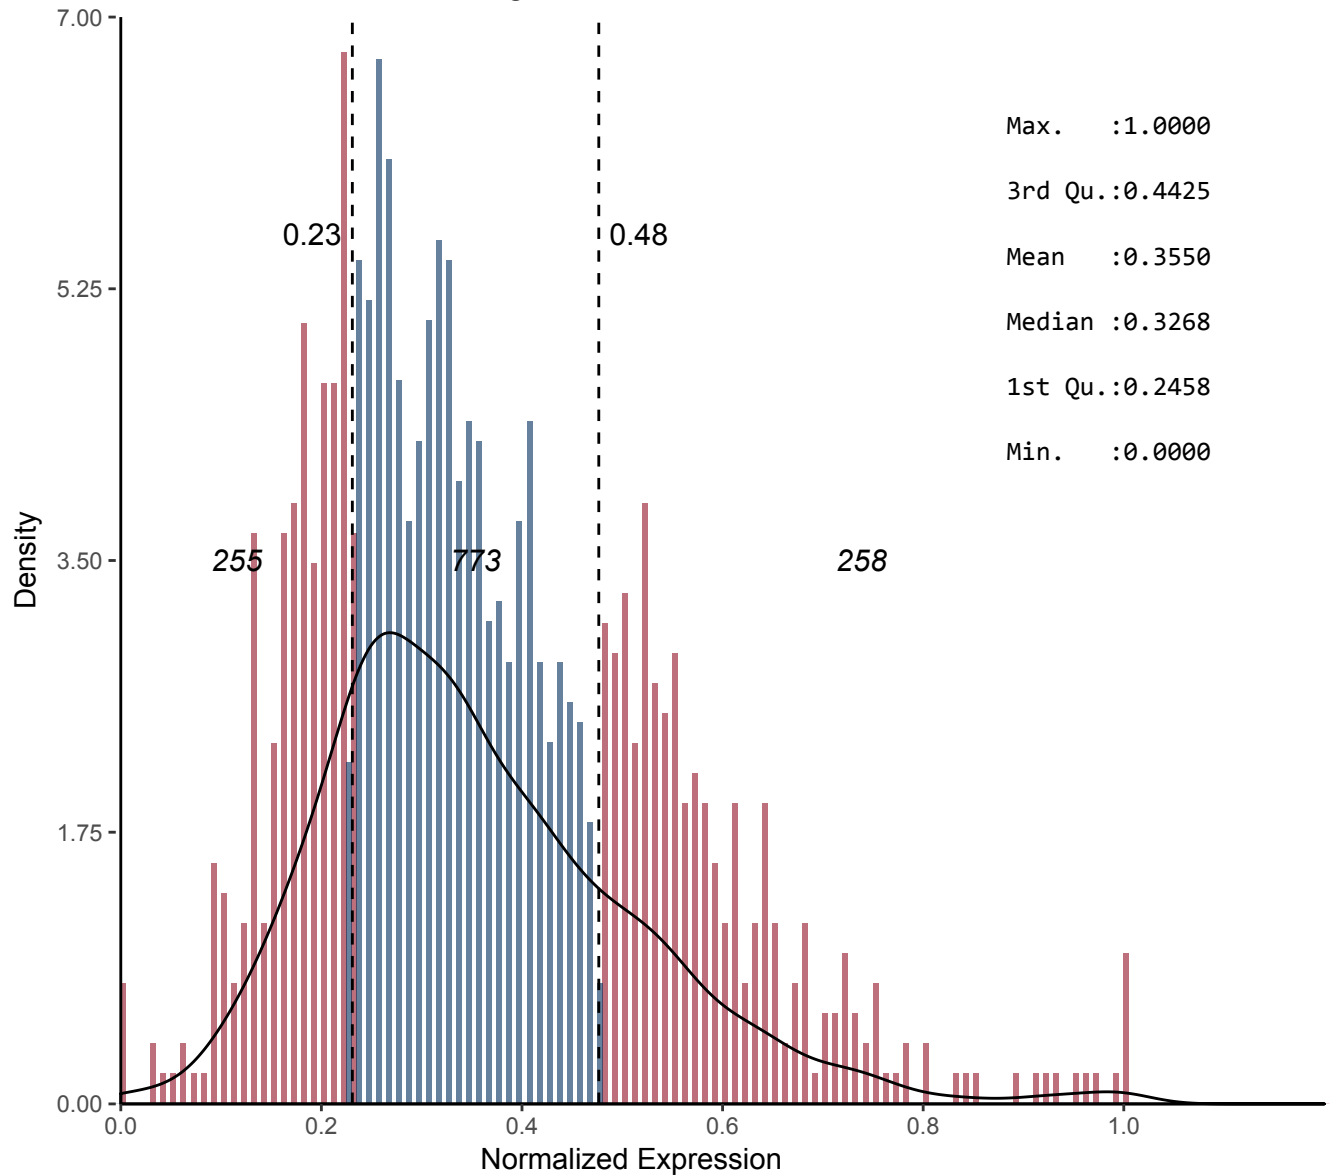

Figure 339 - CD353\*

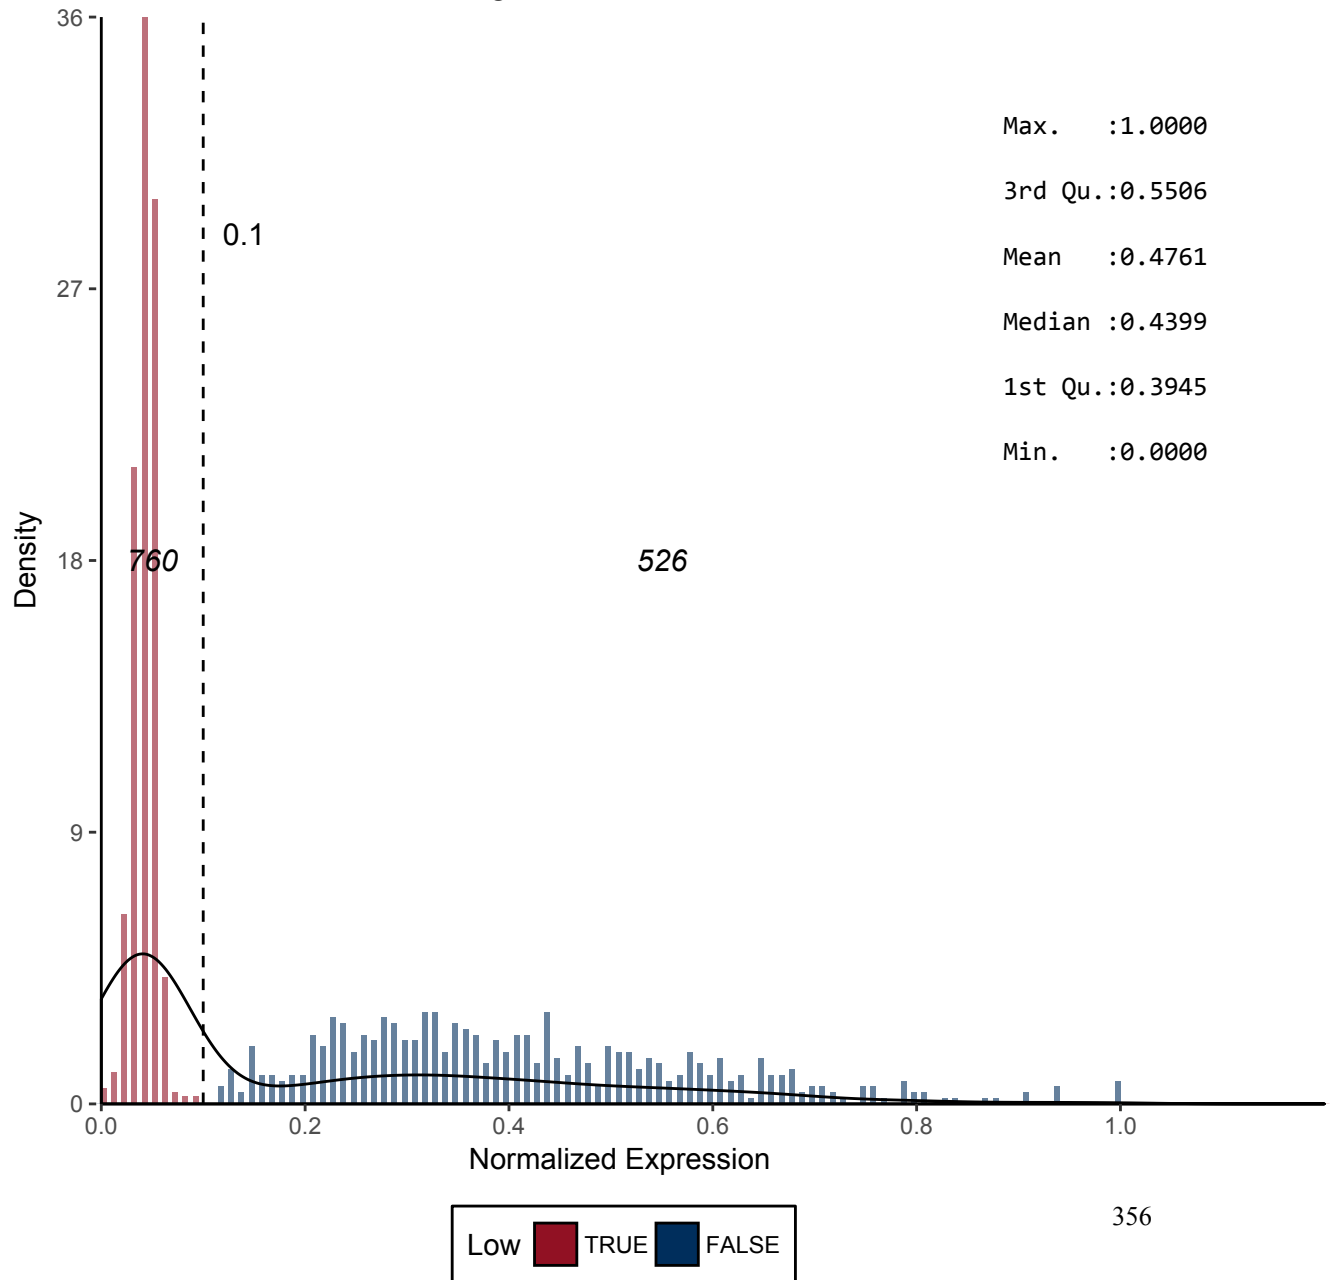

Figure 340 - CD354

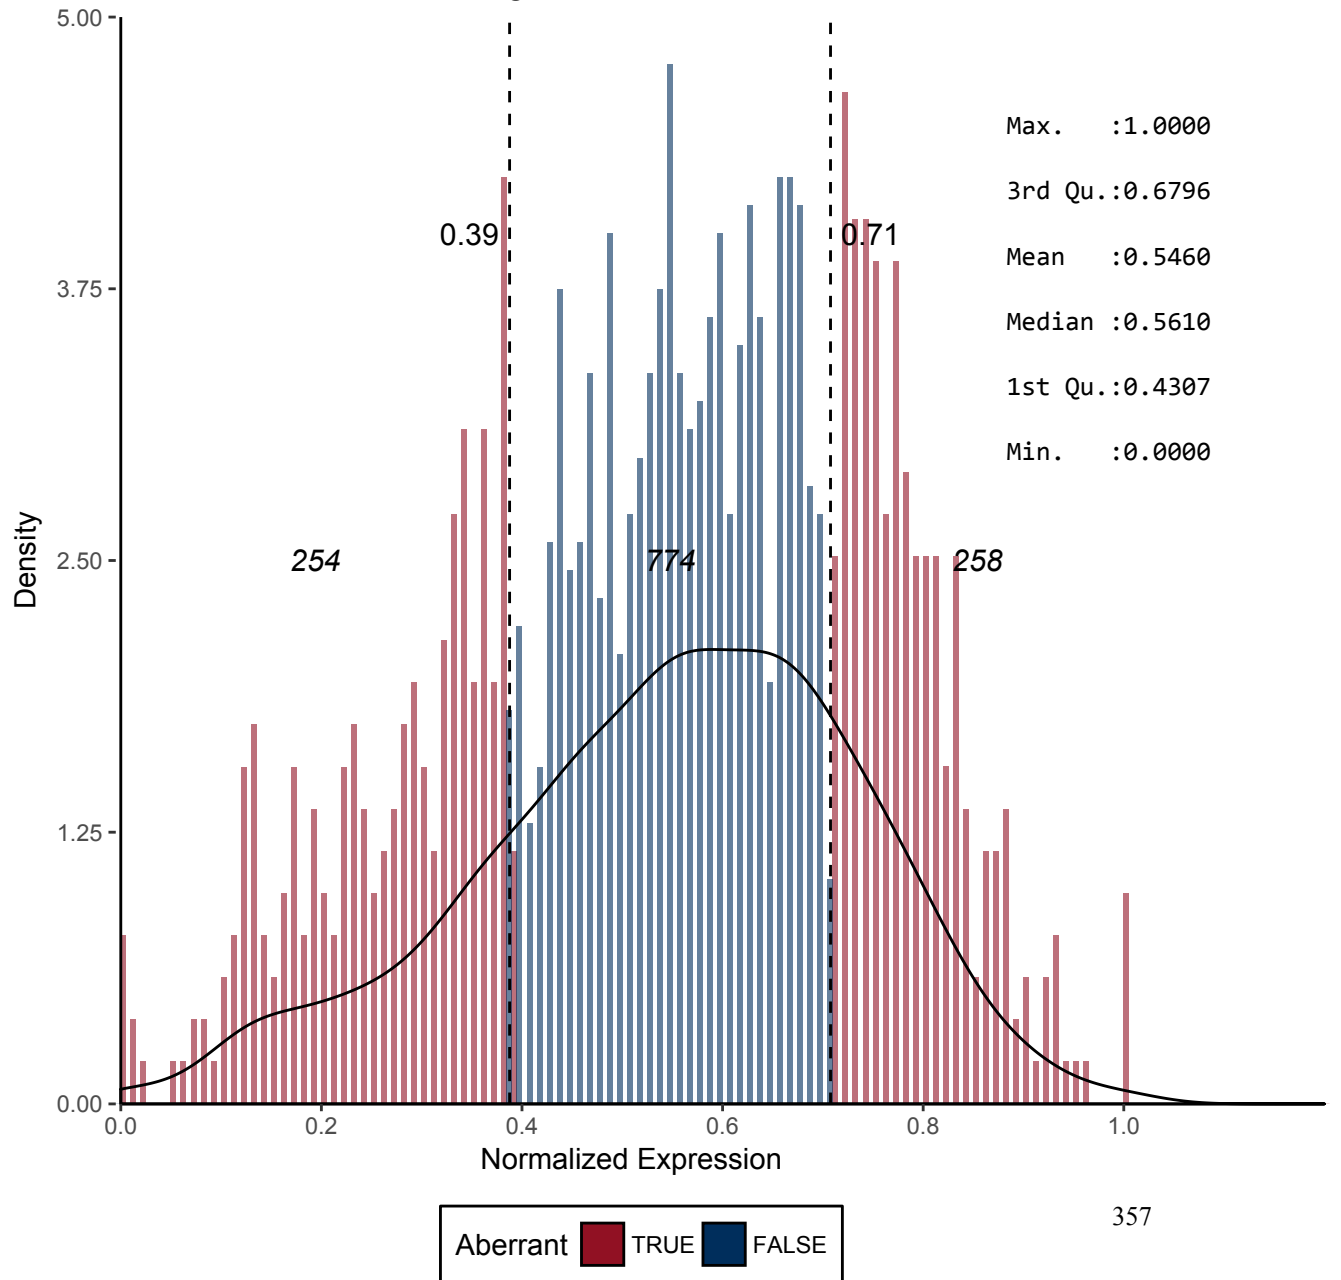

Figure 341 - CD355\*

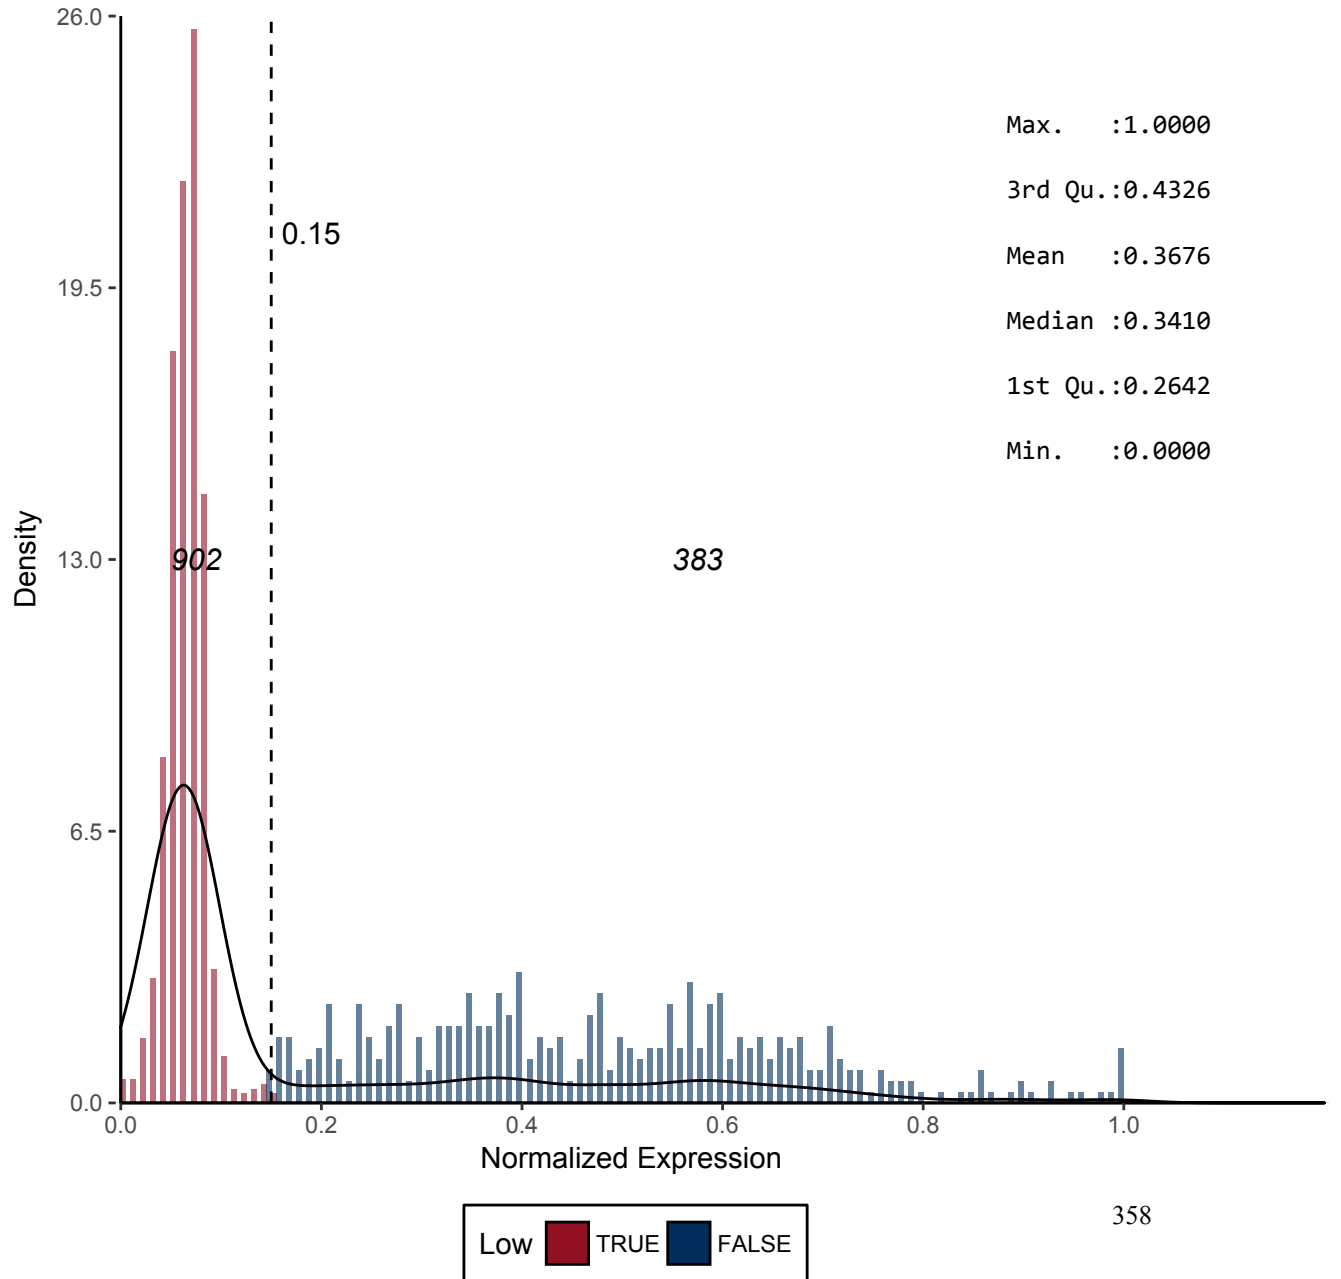

Figure 342 - CD357\*

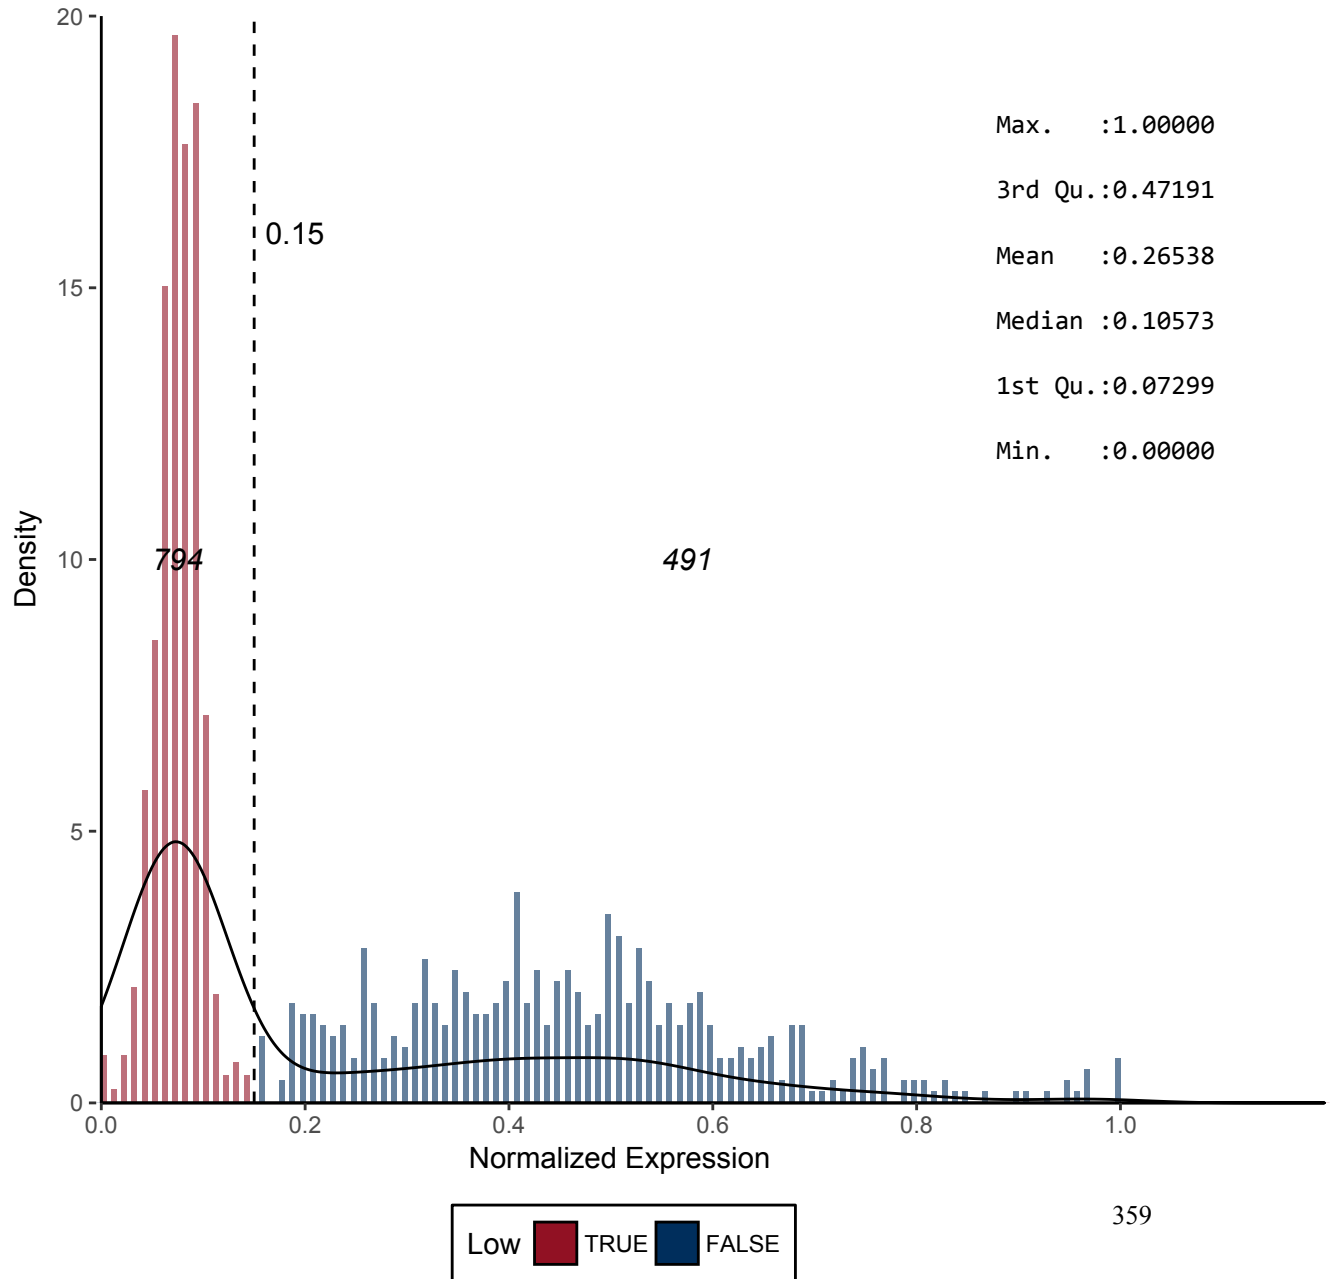

Figure 343 - CD358

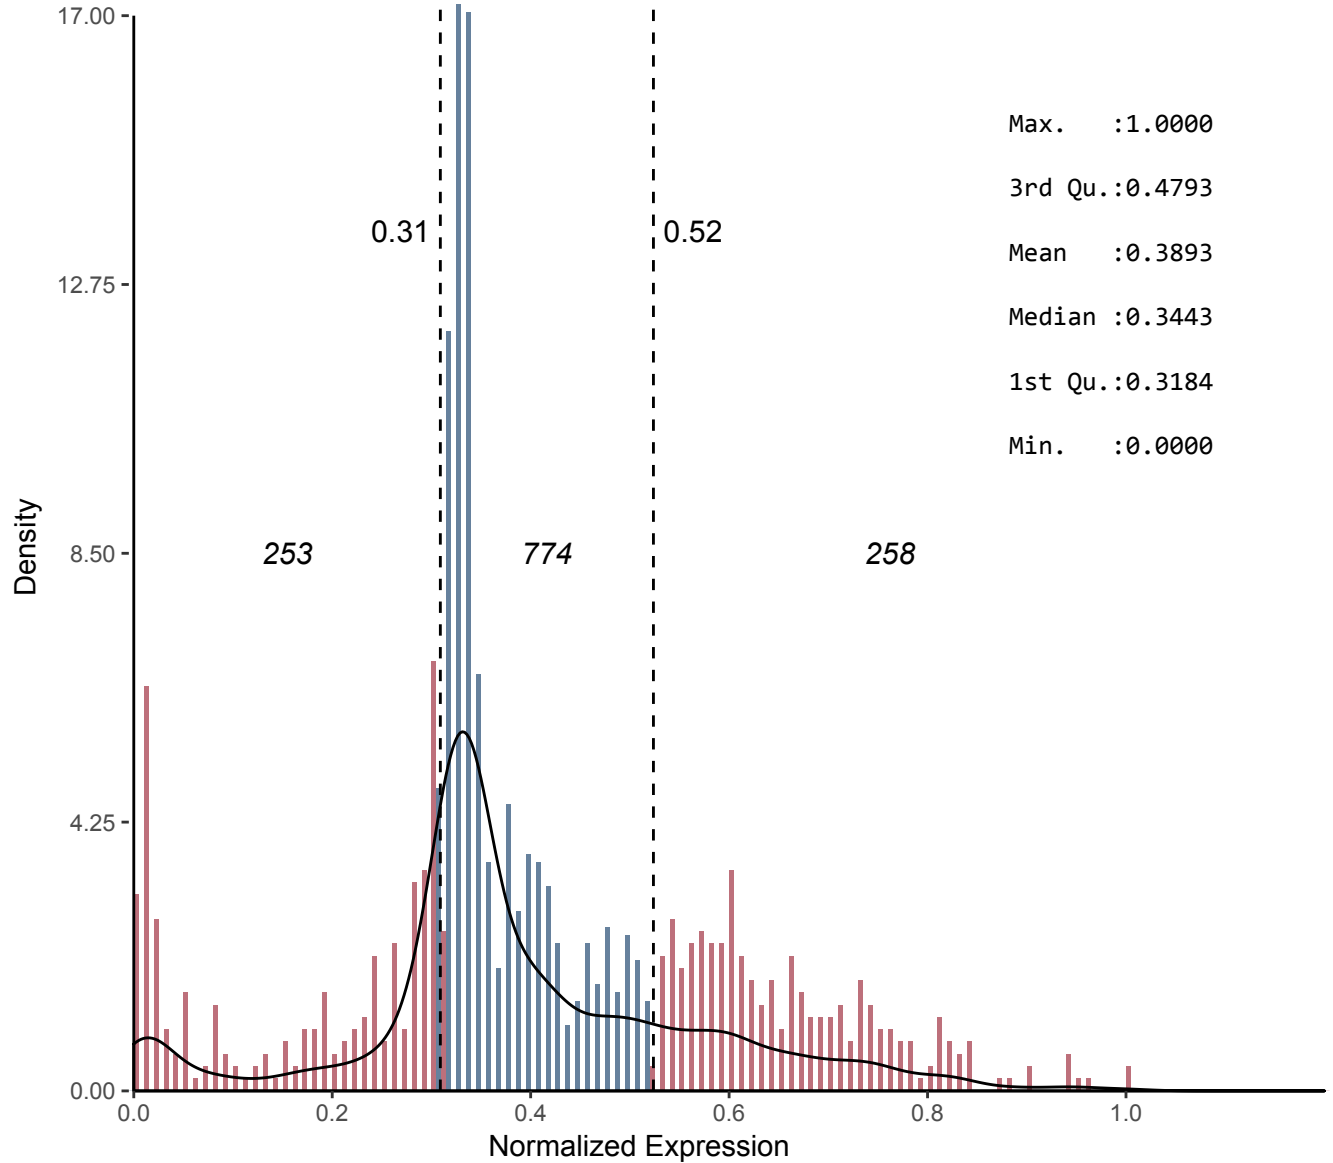

Aberrant ■ TRUE ■ FALSE



Figure 344 - CD360

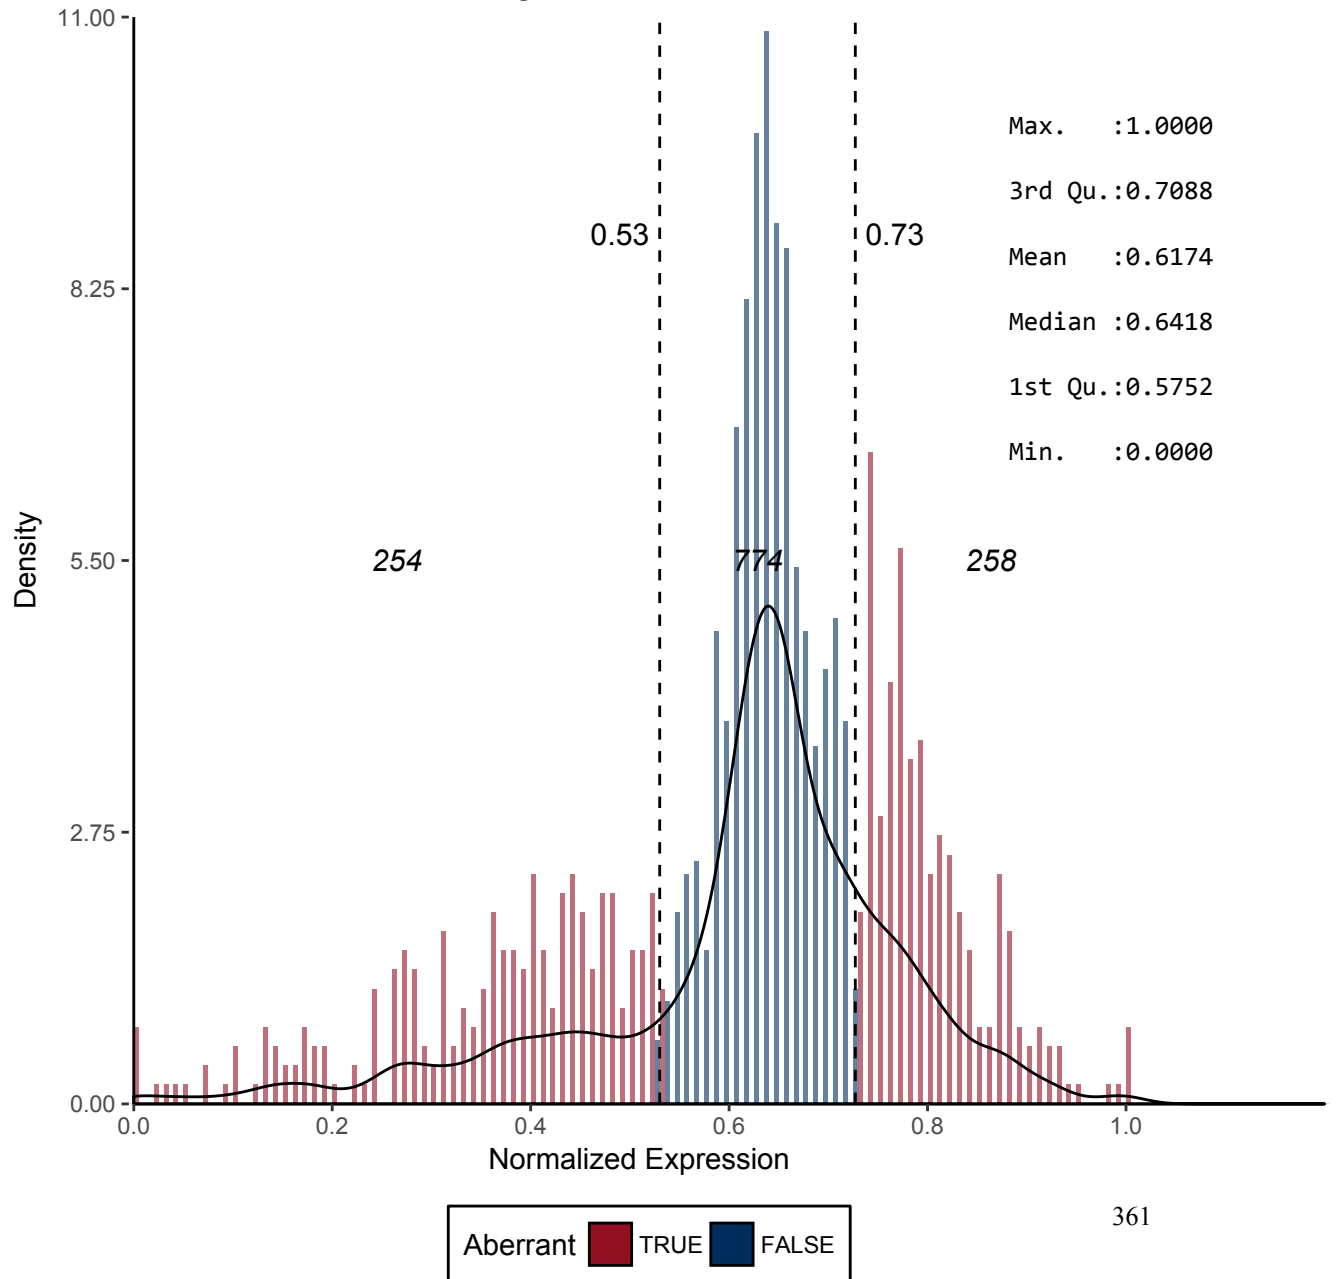

Figure 345 - CD361

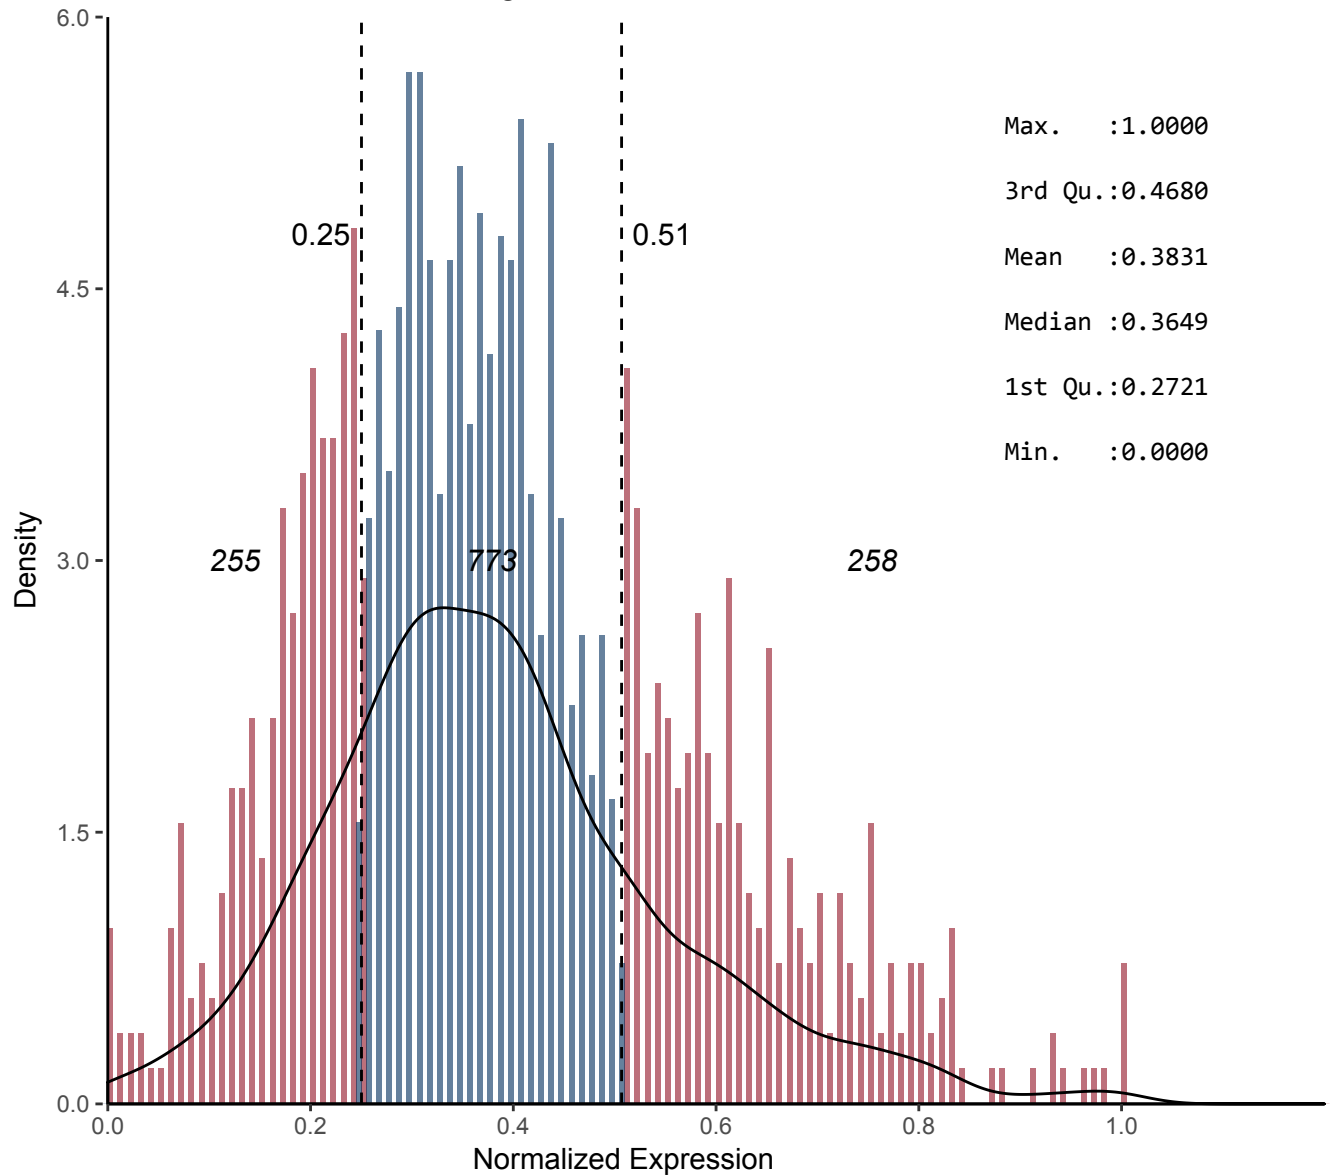

Aberrant TRUE FALSE

Figure 346 - CD362

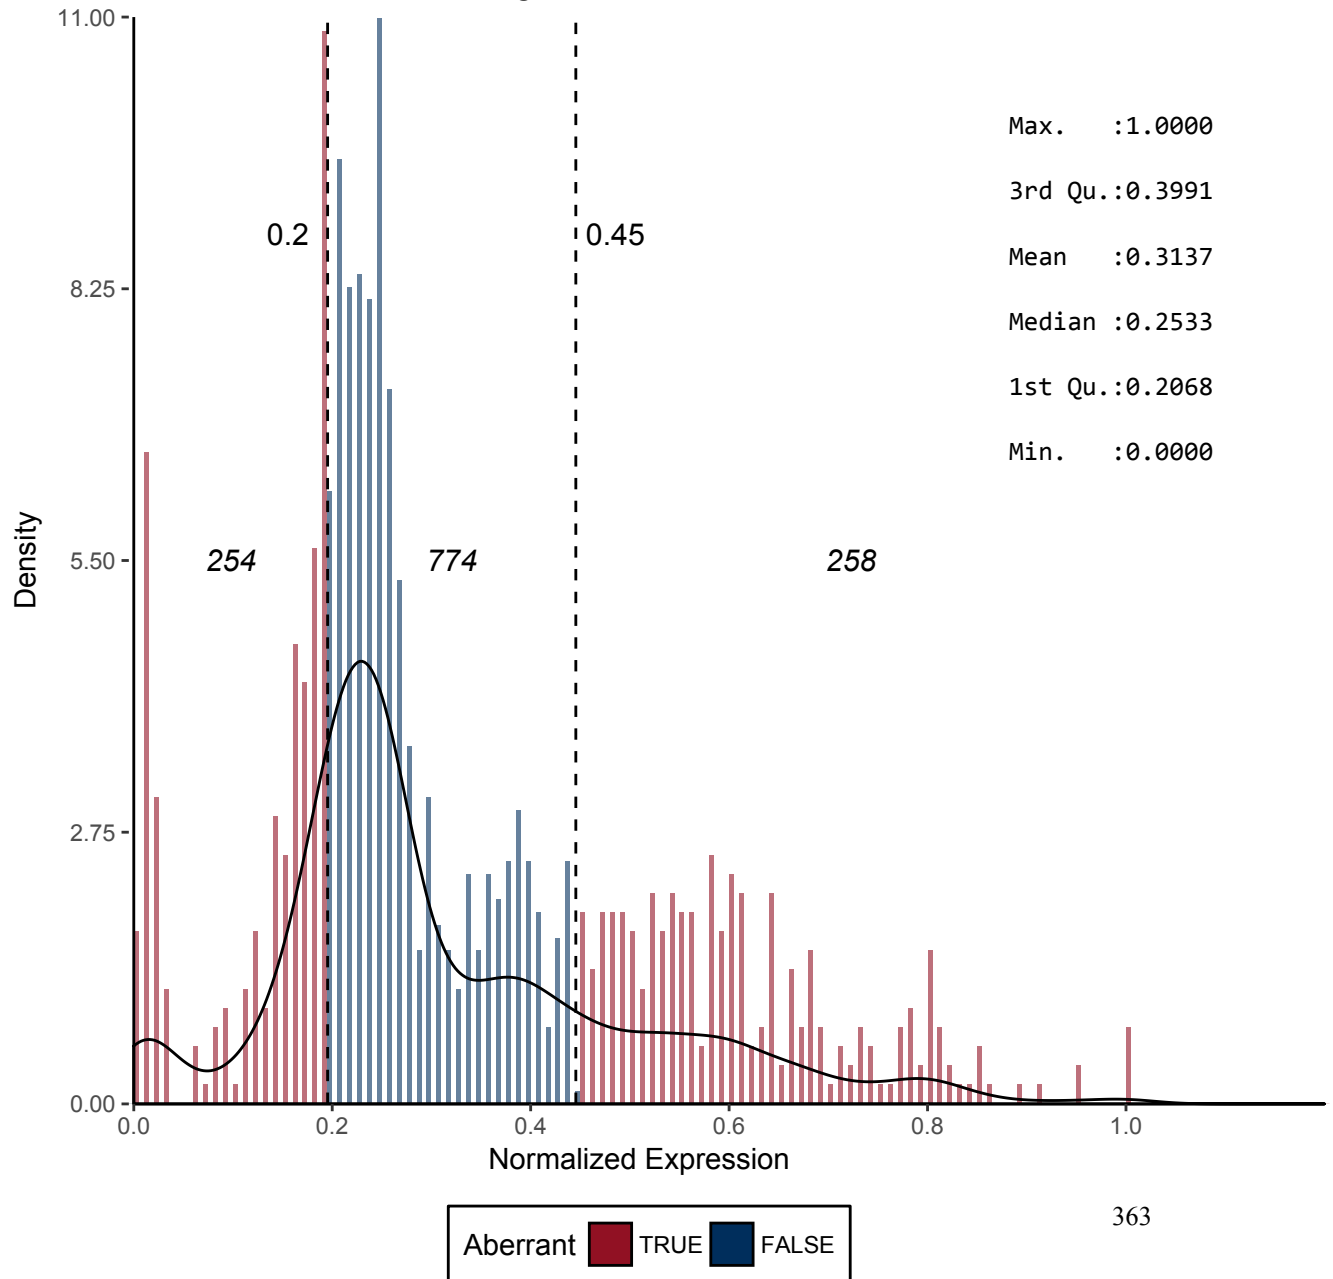

Figure 347 - CD363

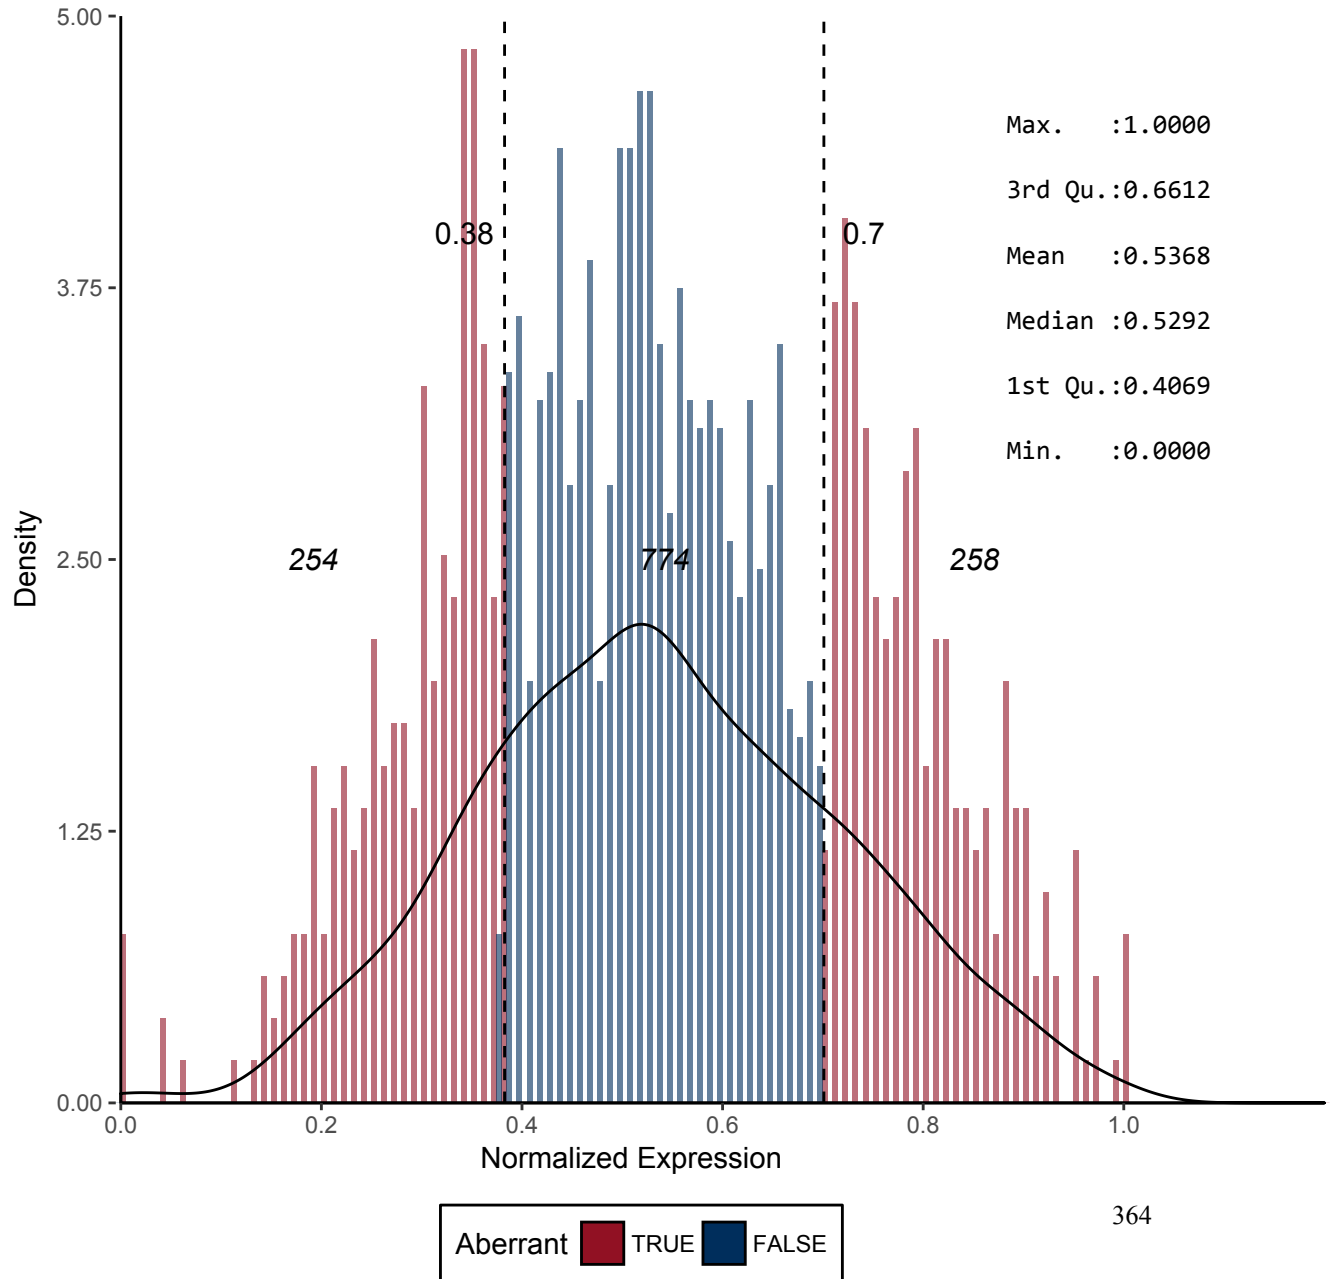

Figure 348 - CD364

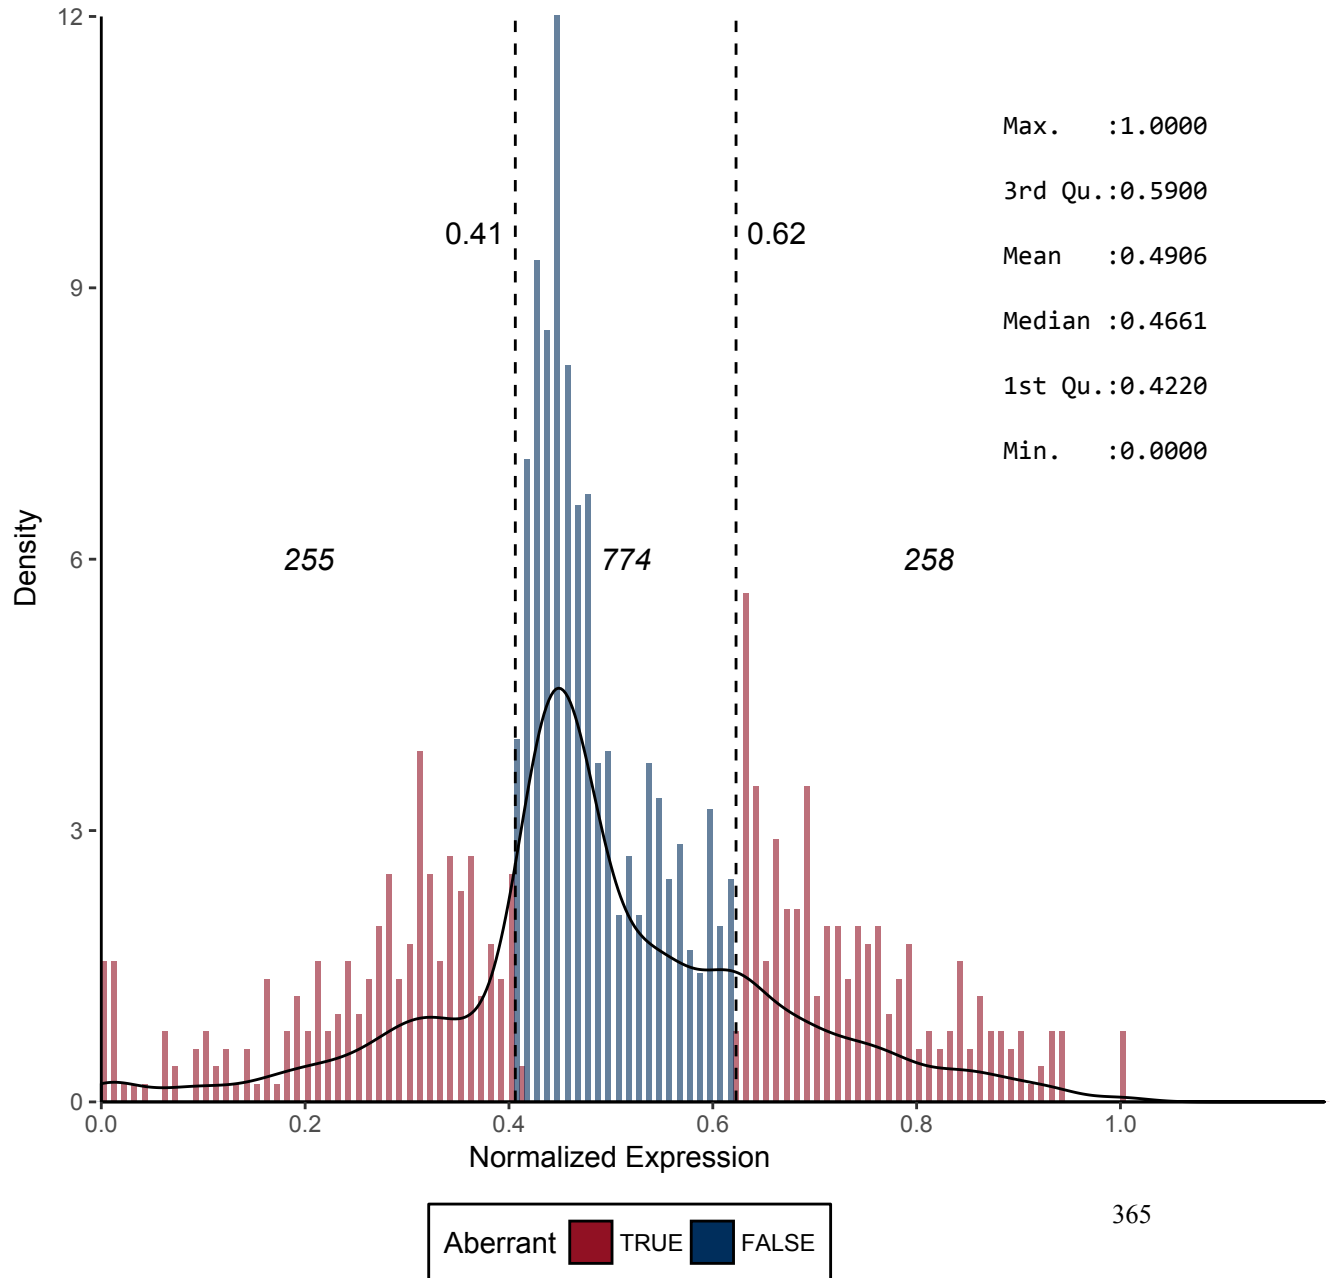

Figure 349 - CD366

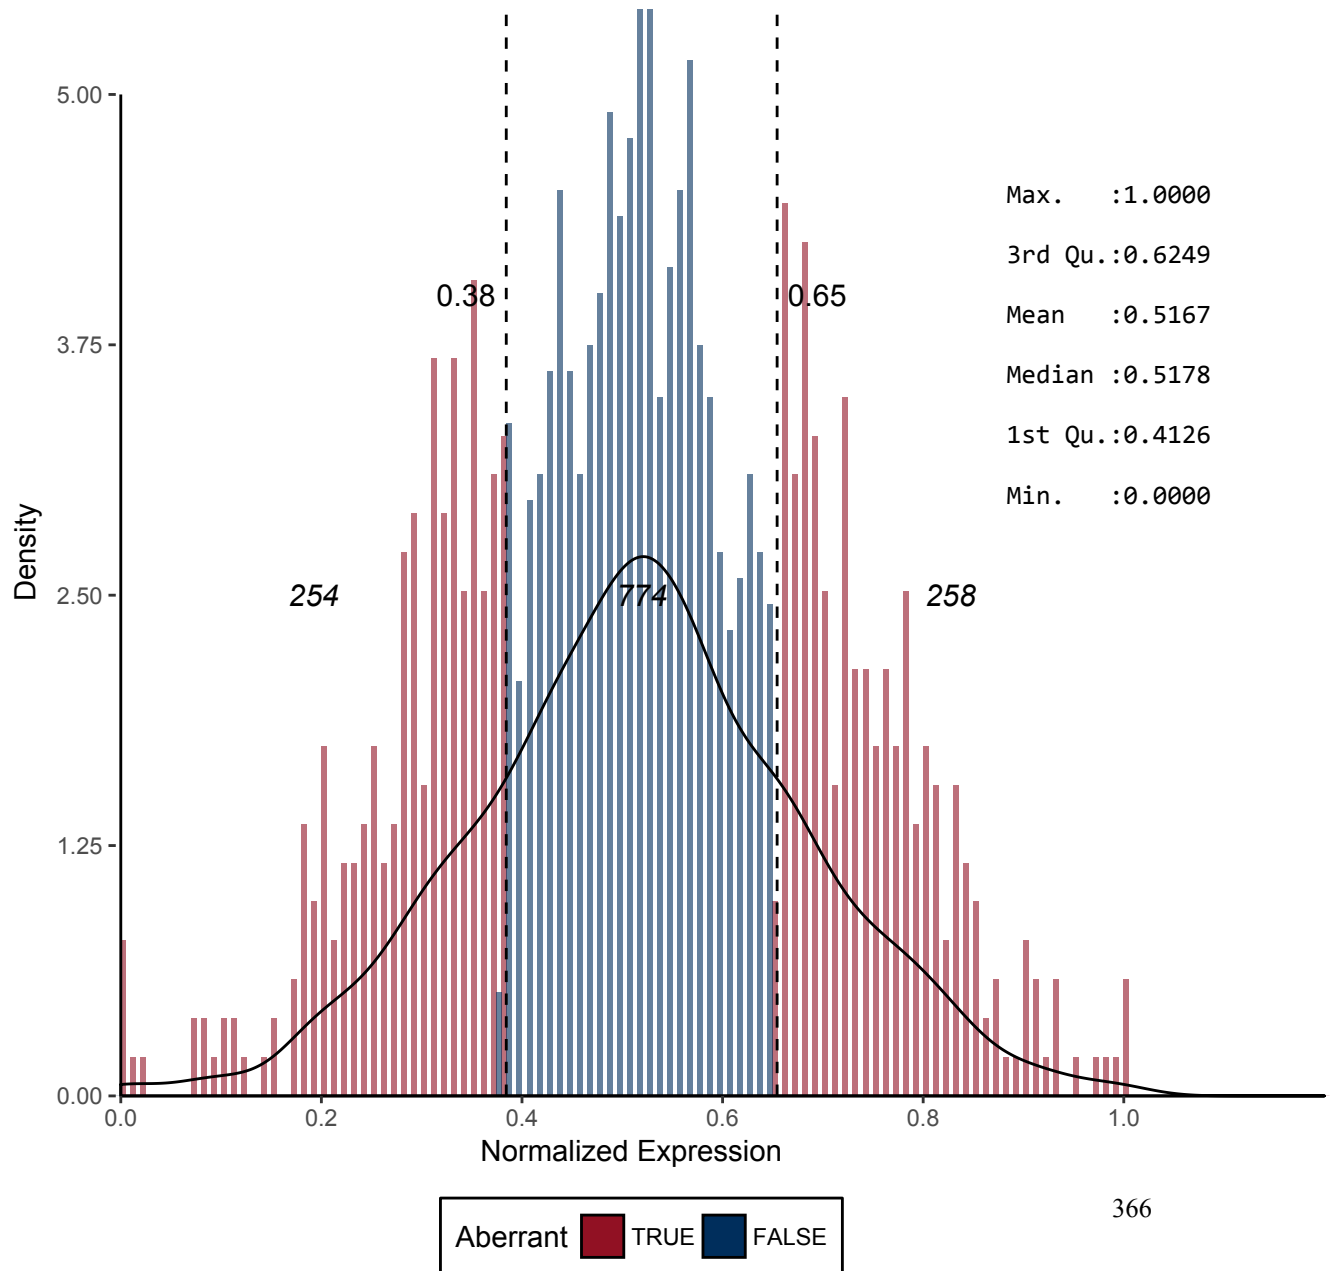

Figure 350 - CD367

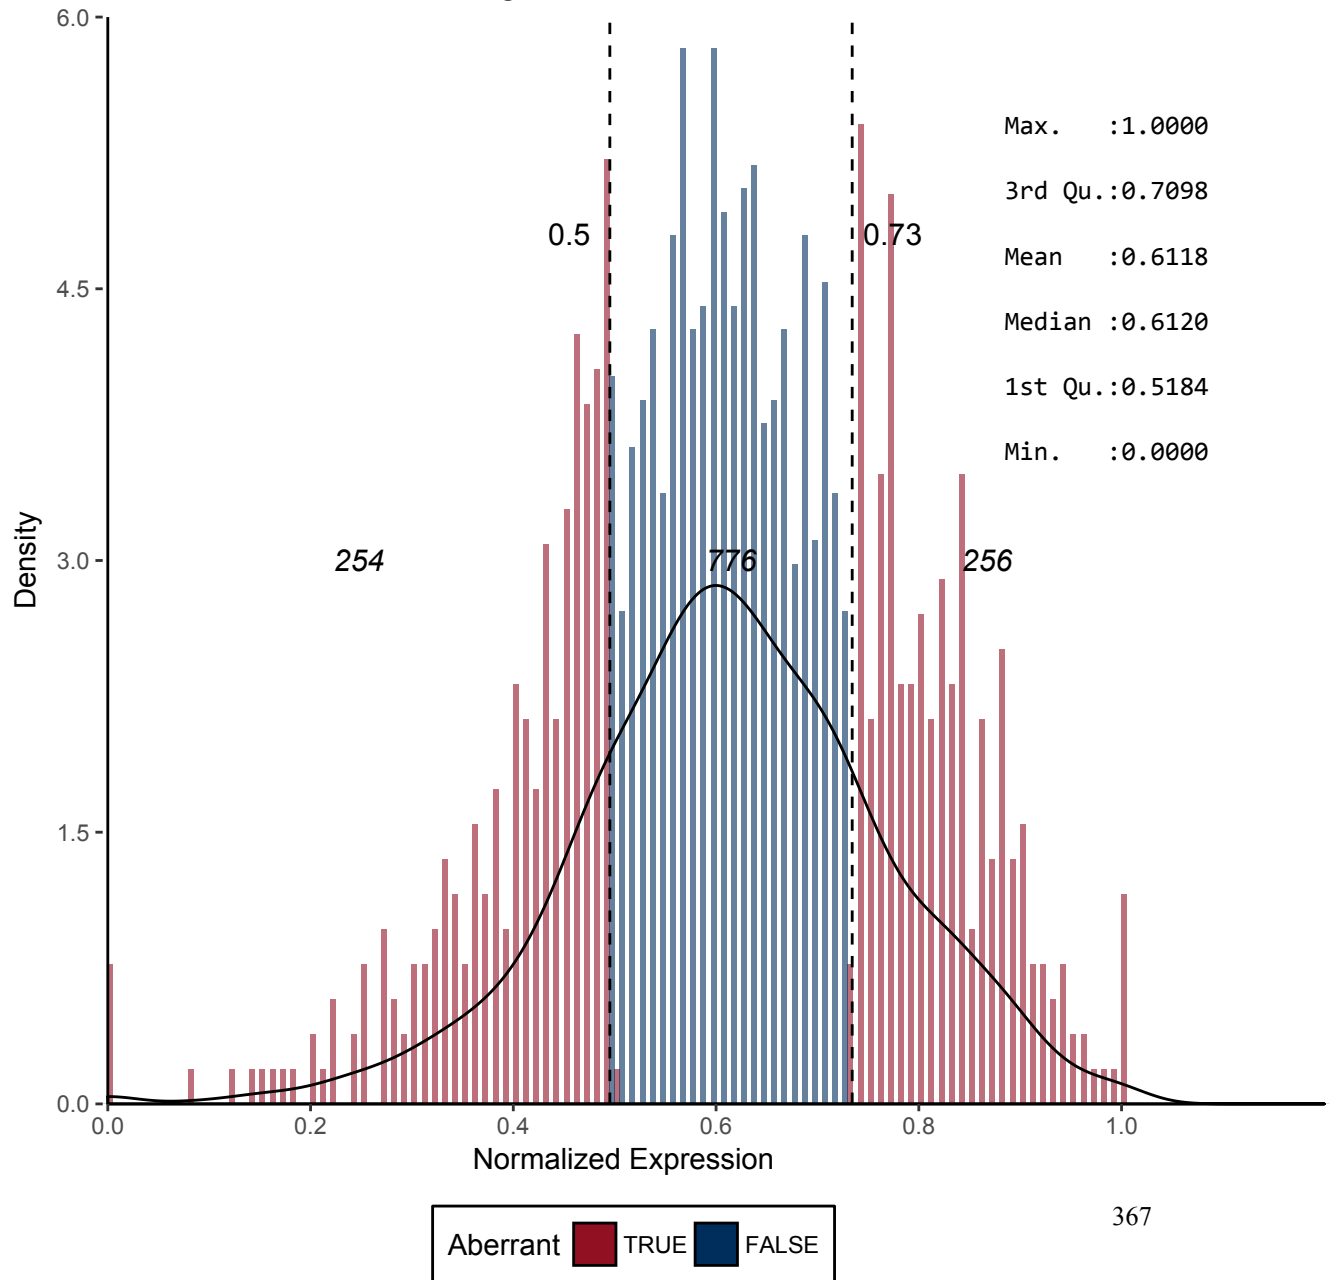

Figure 351 - CD369

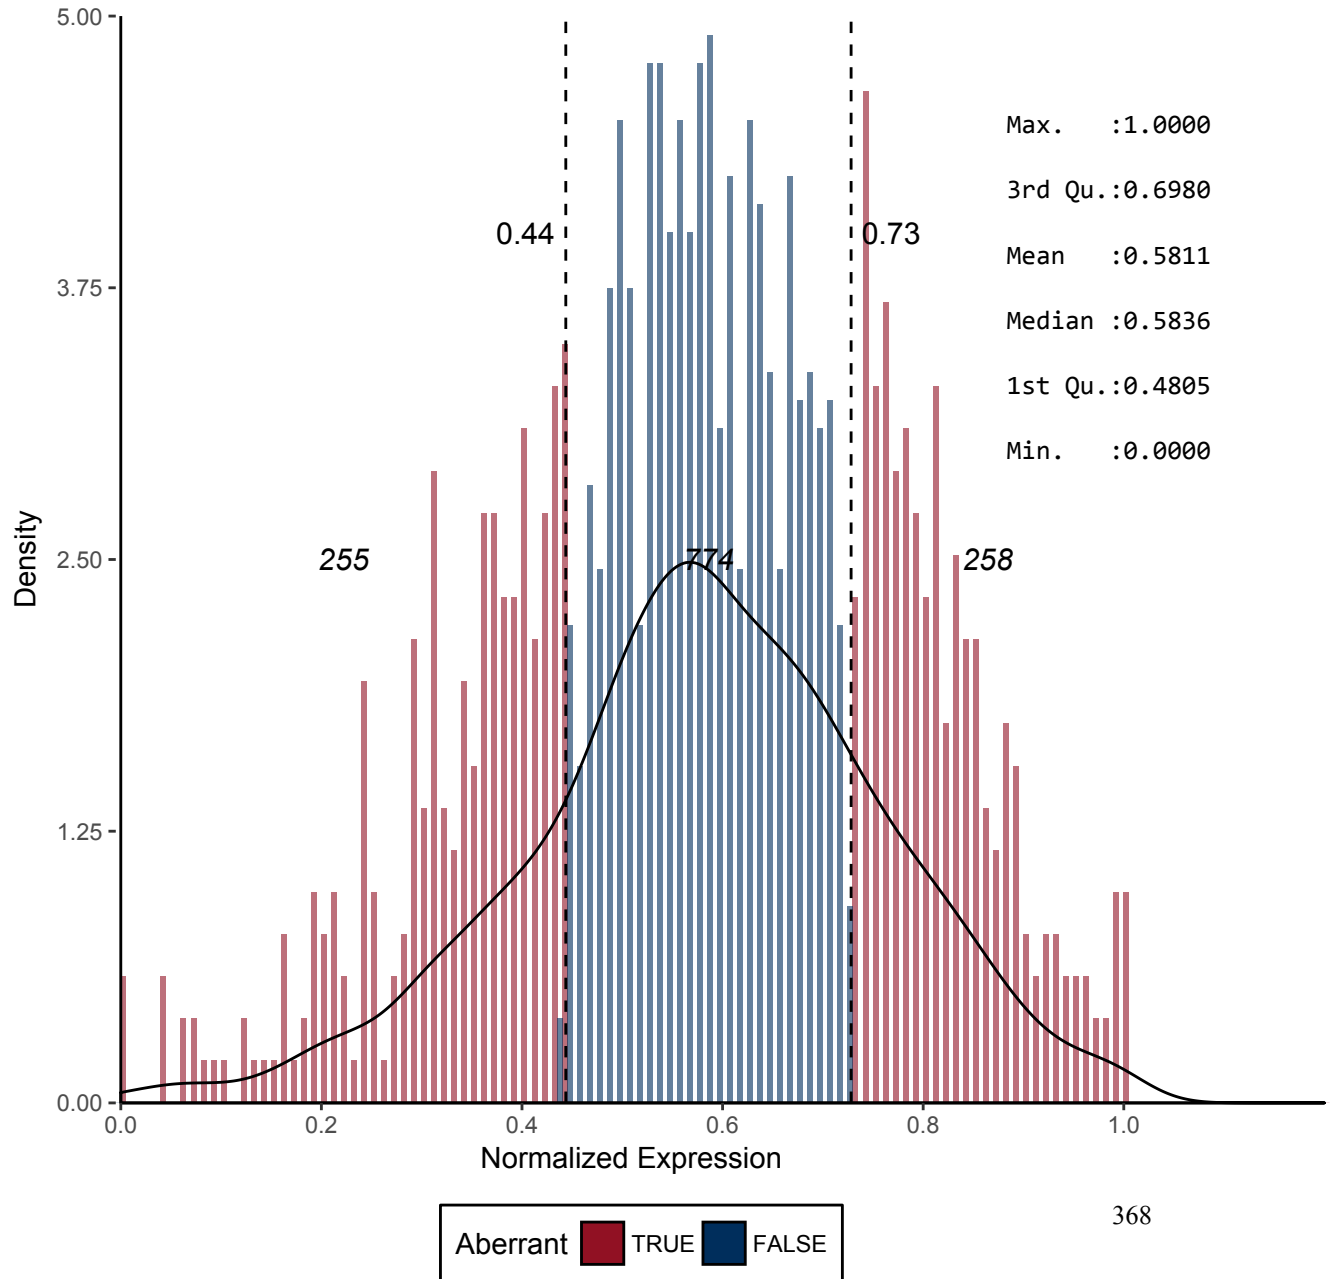

Source: https://www.biorxiv.org/content/10.1101/277145v1.full.pdf
